# Supplementary material
Source: PubMed Central journal article supplement (PMC6773552)

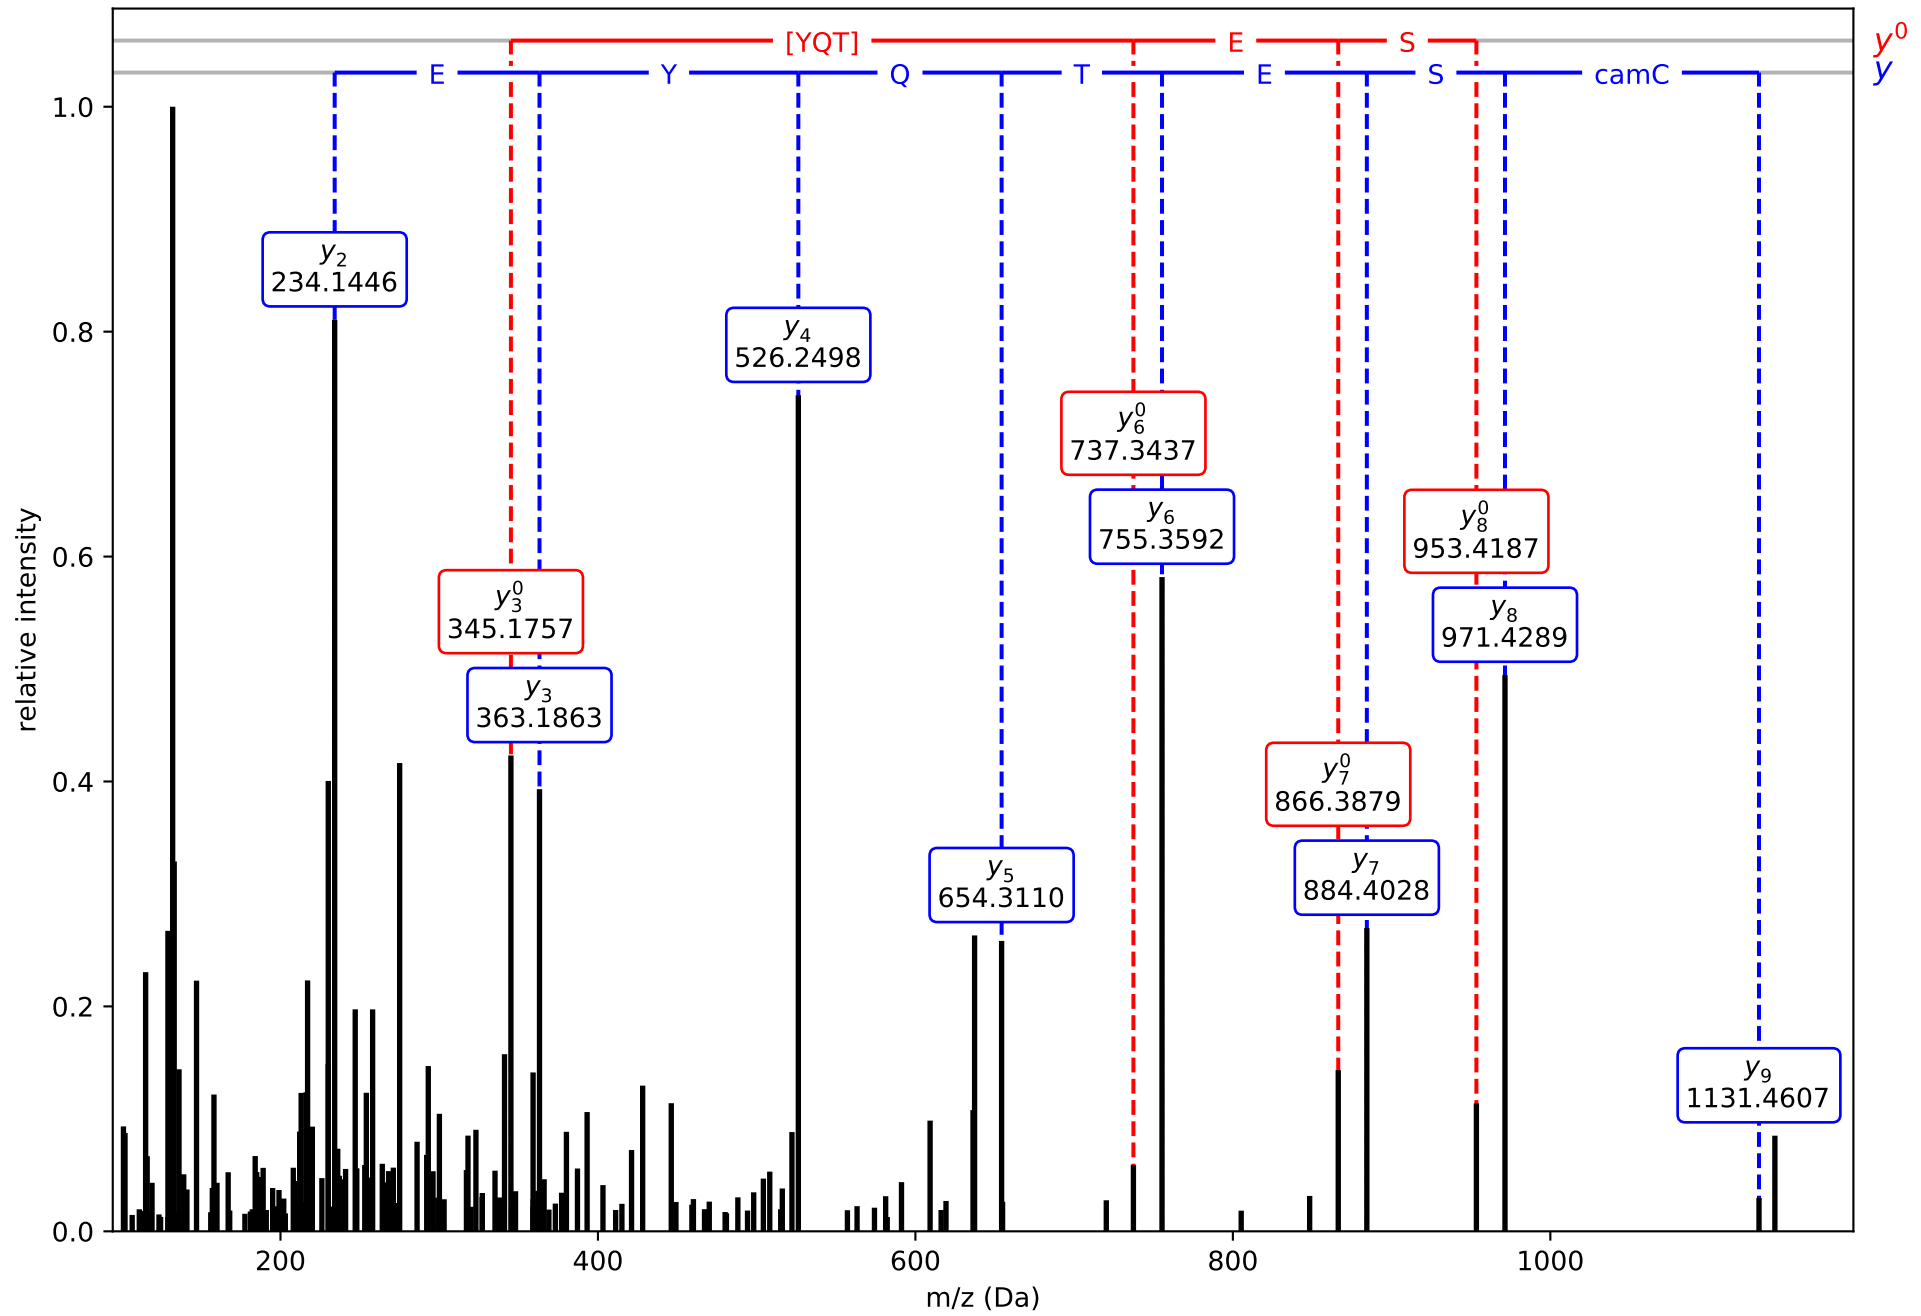



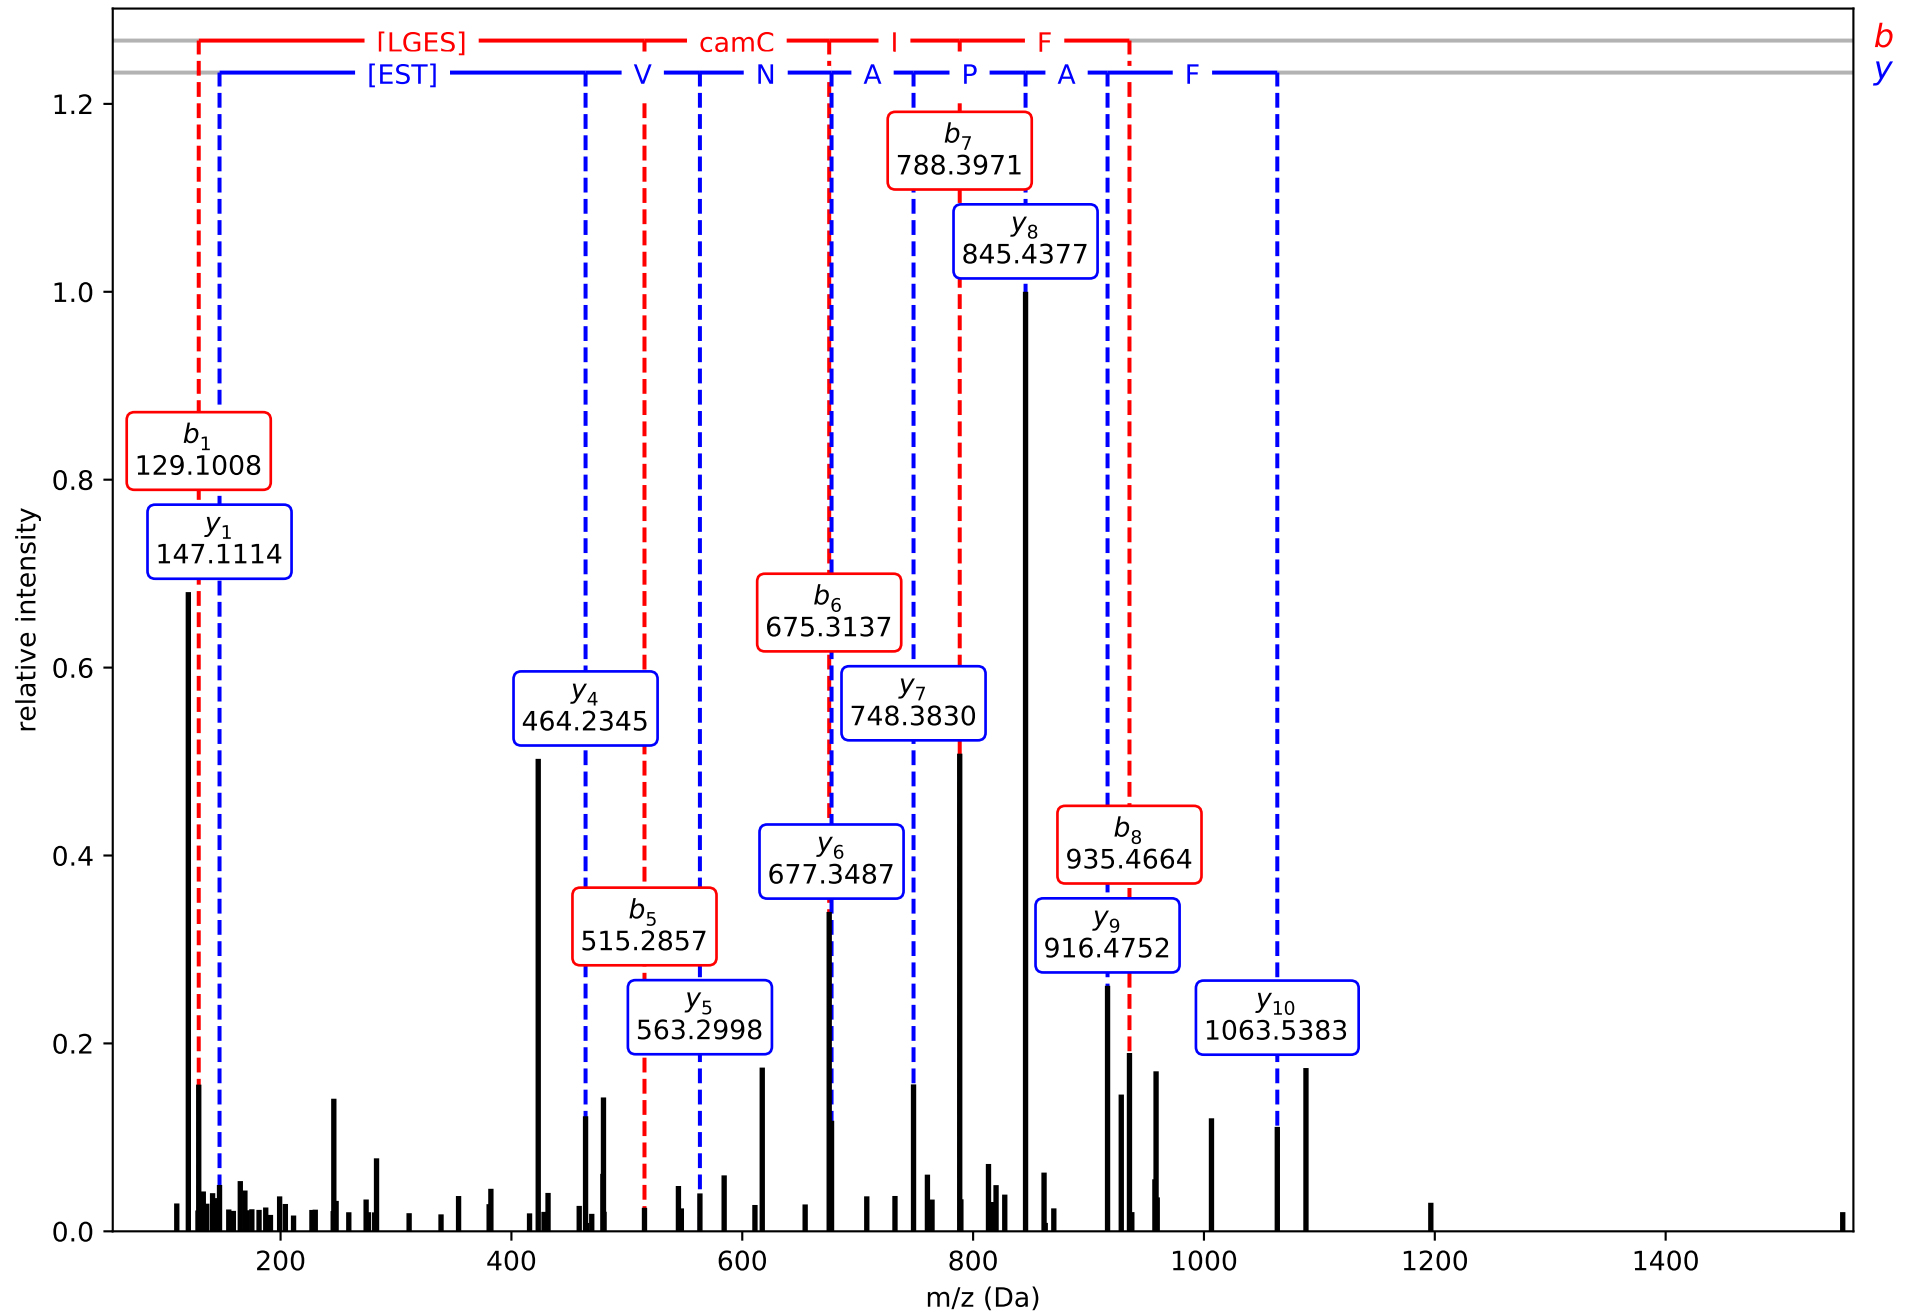

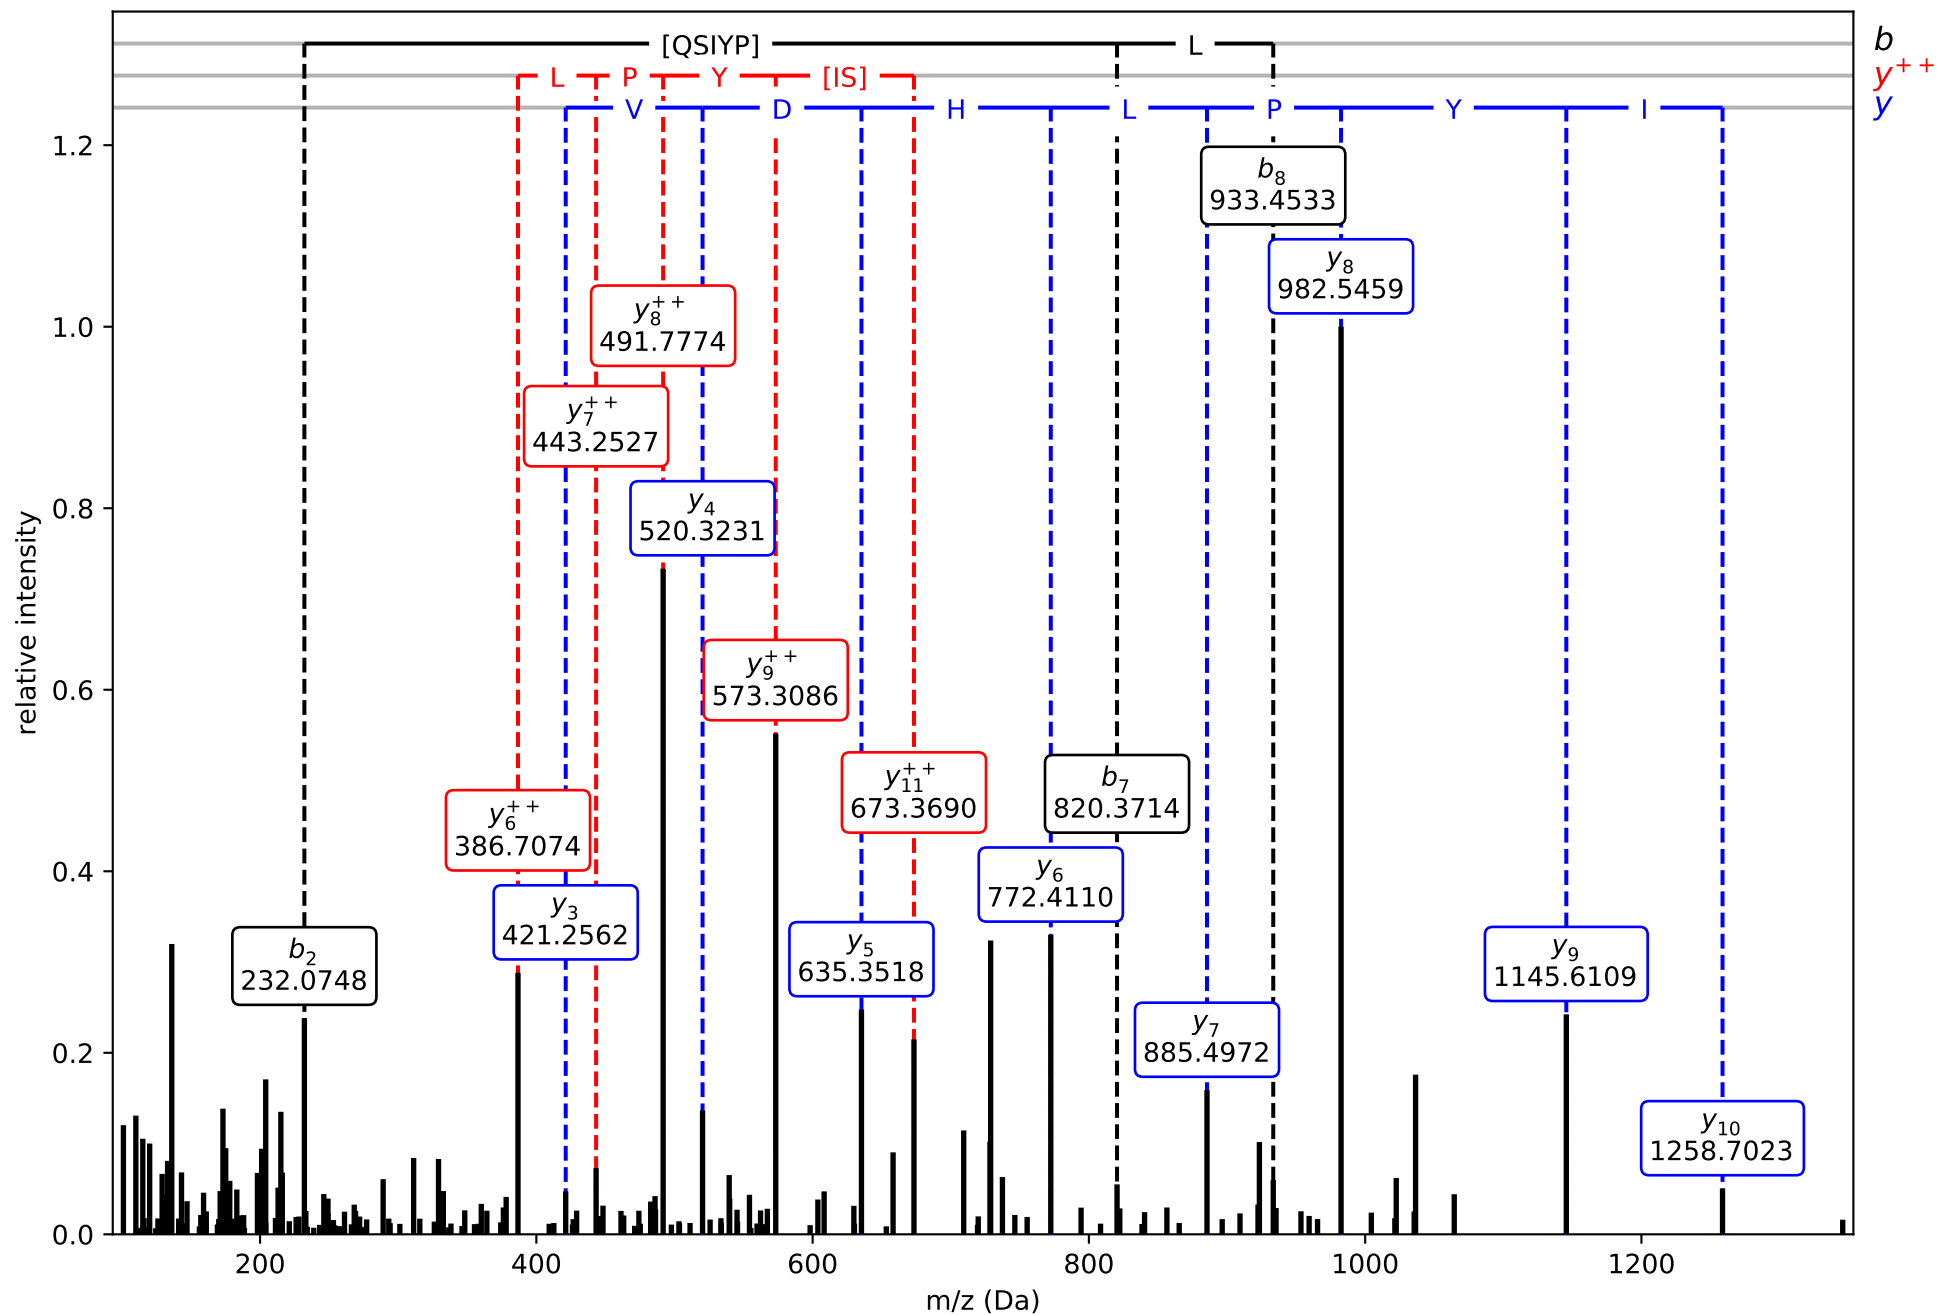

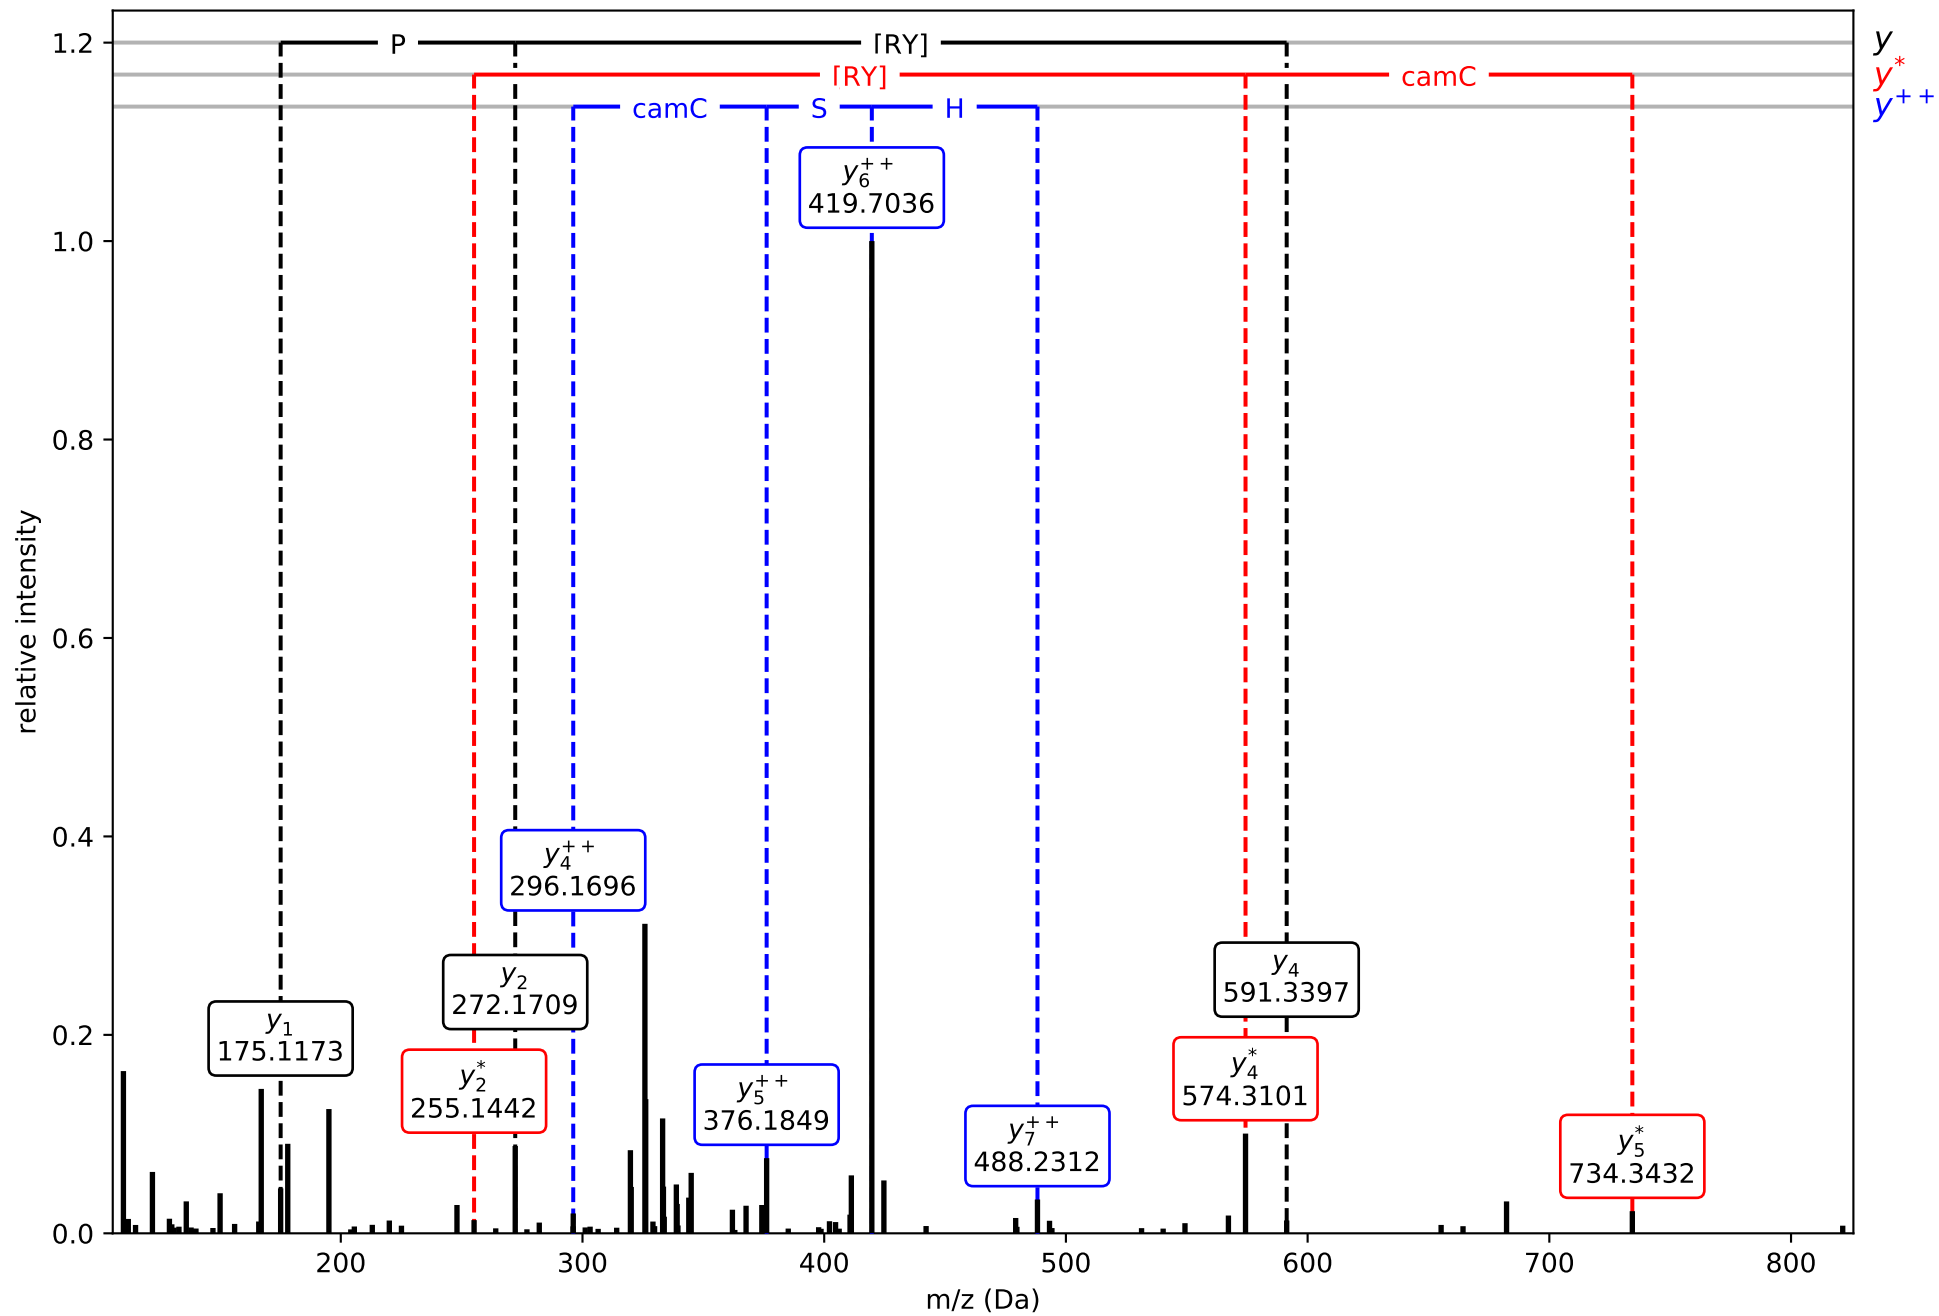

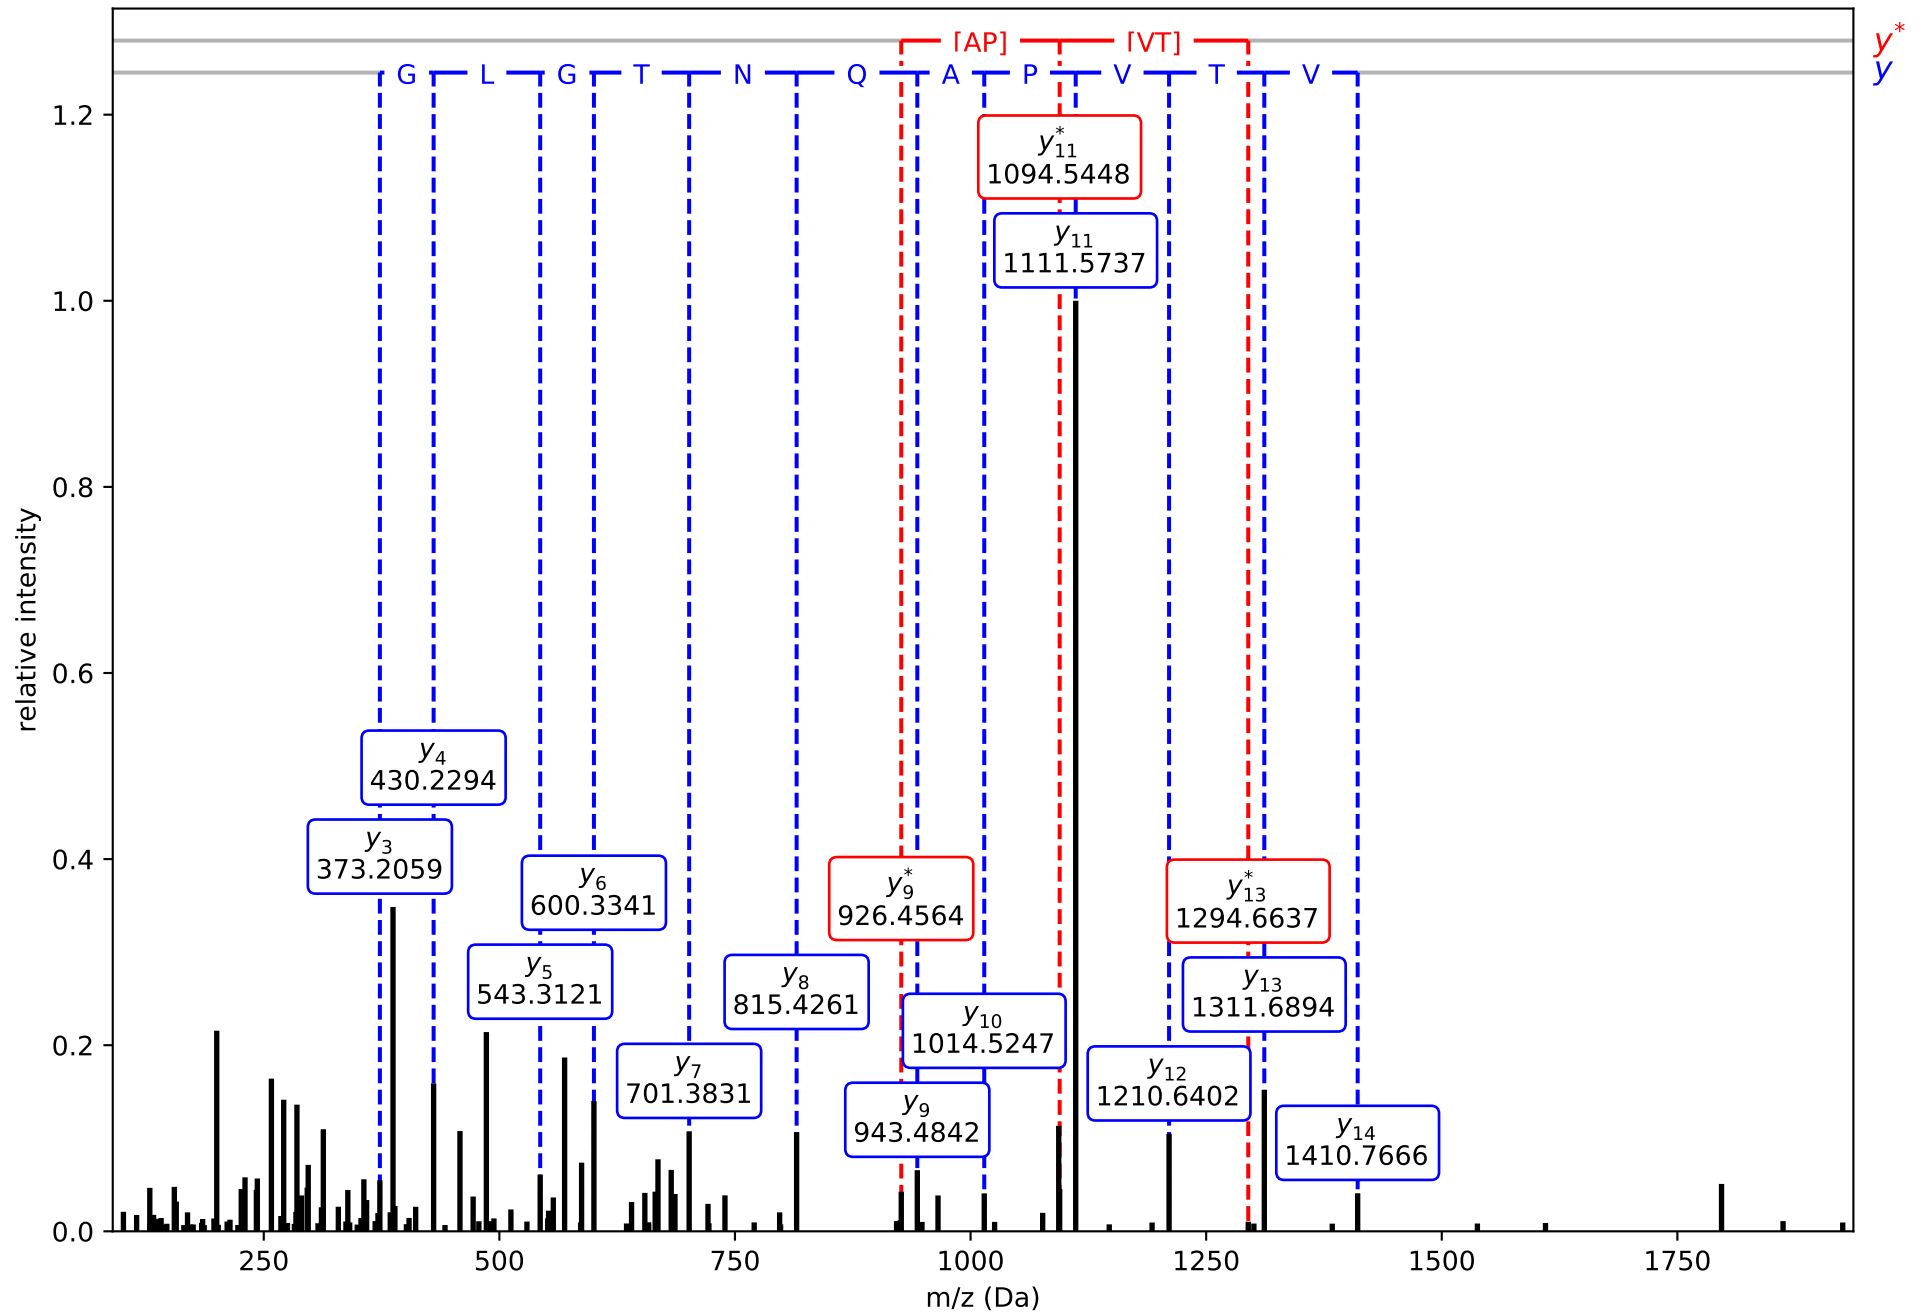

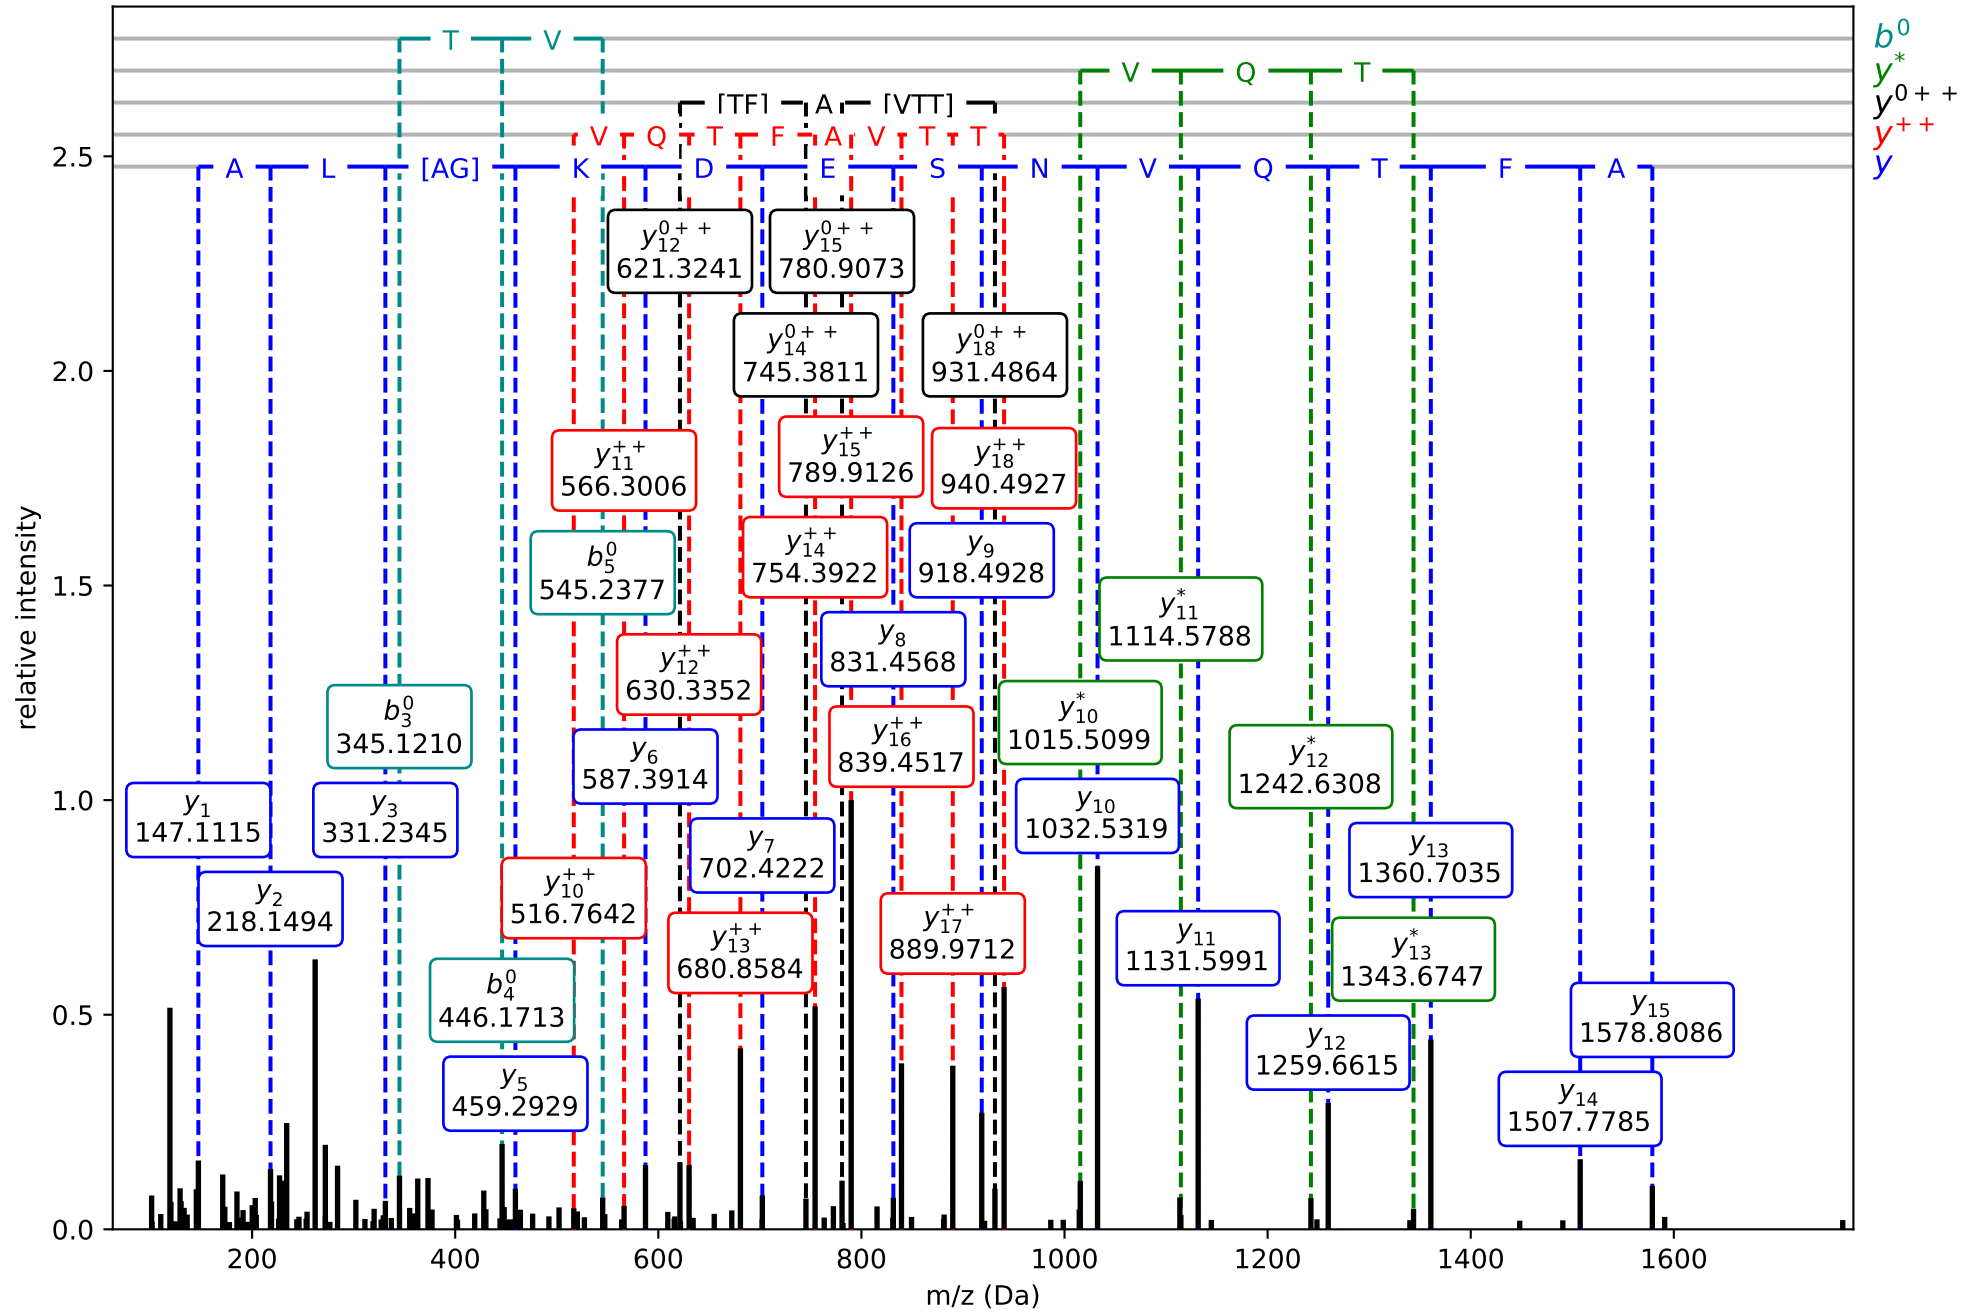

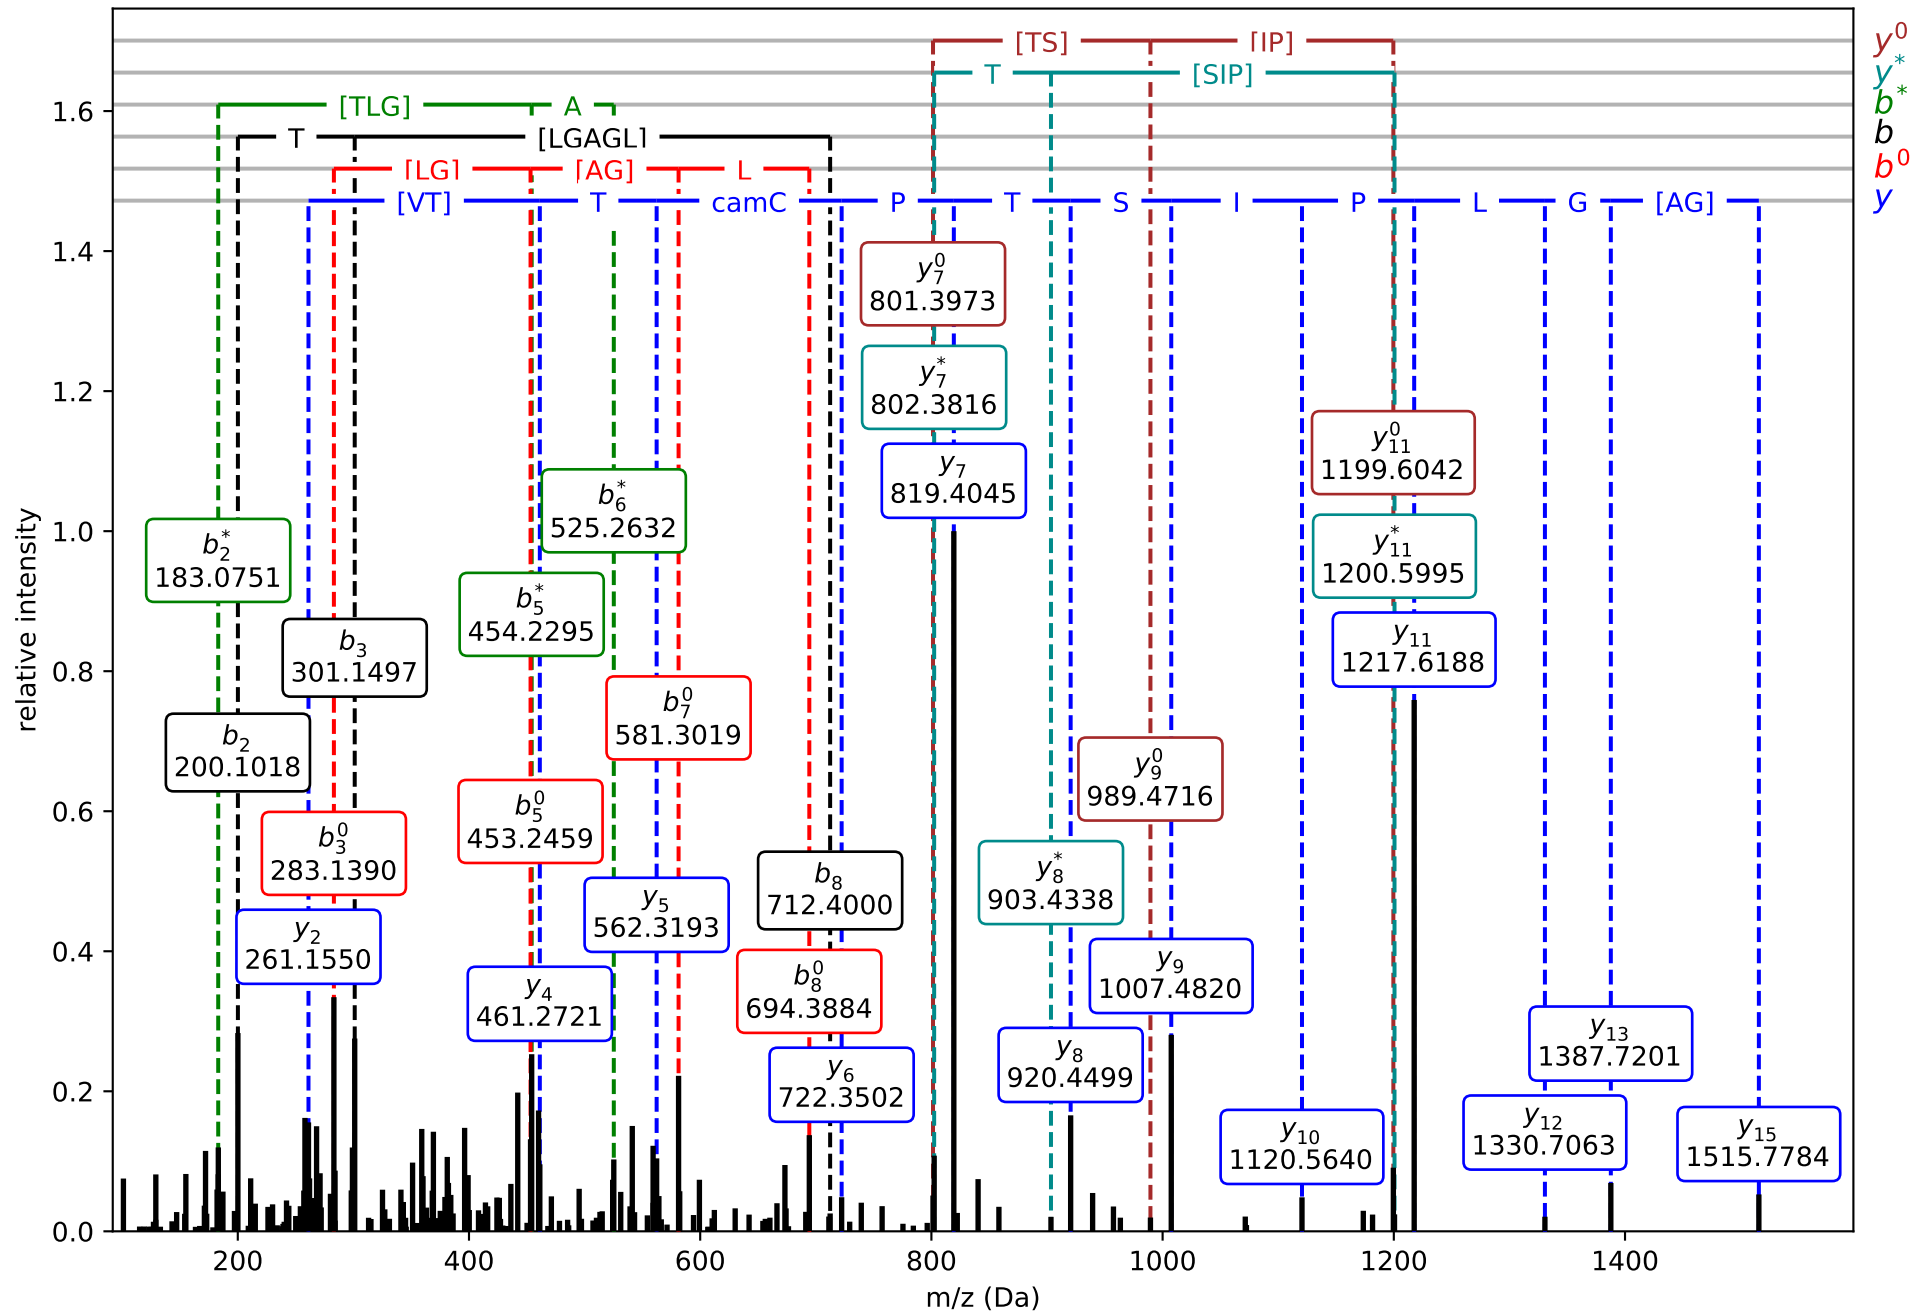



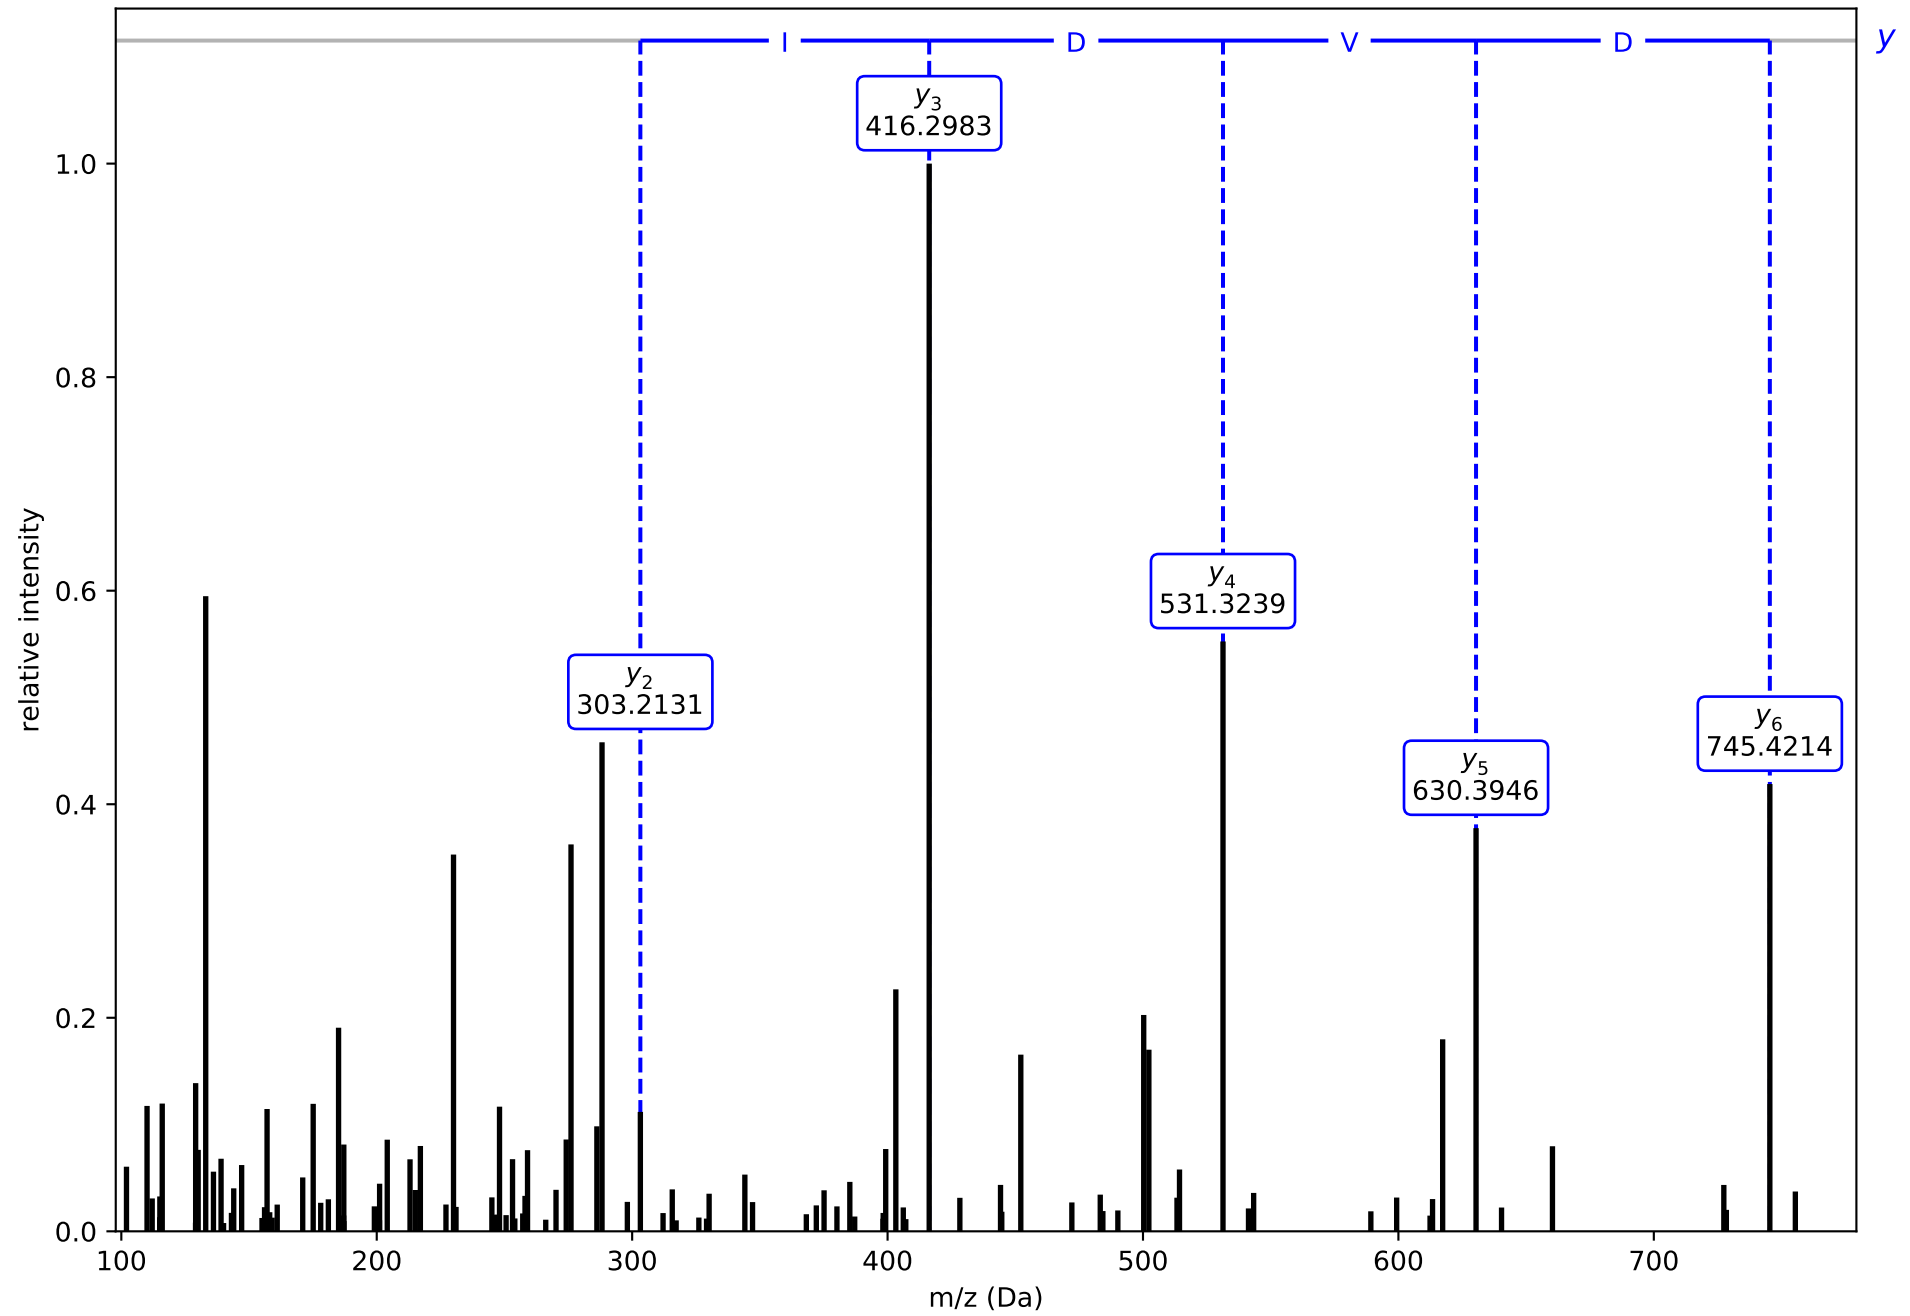

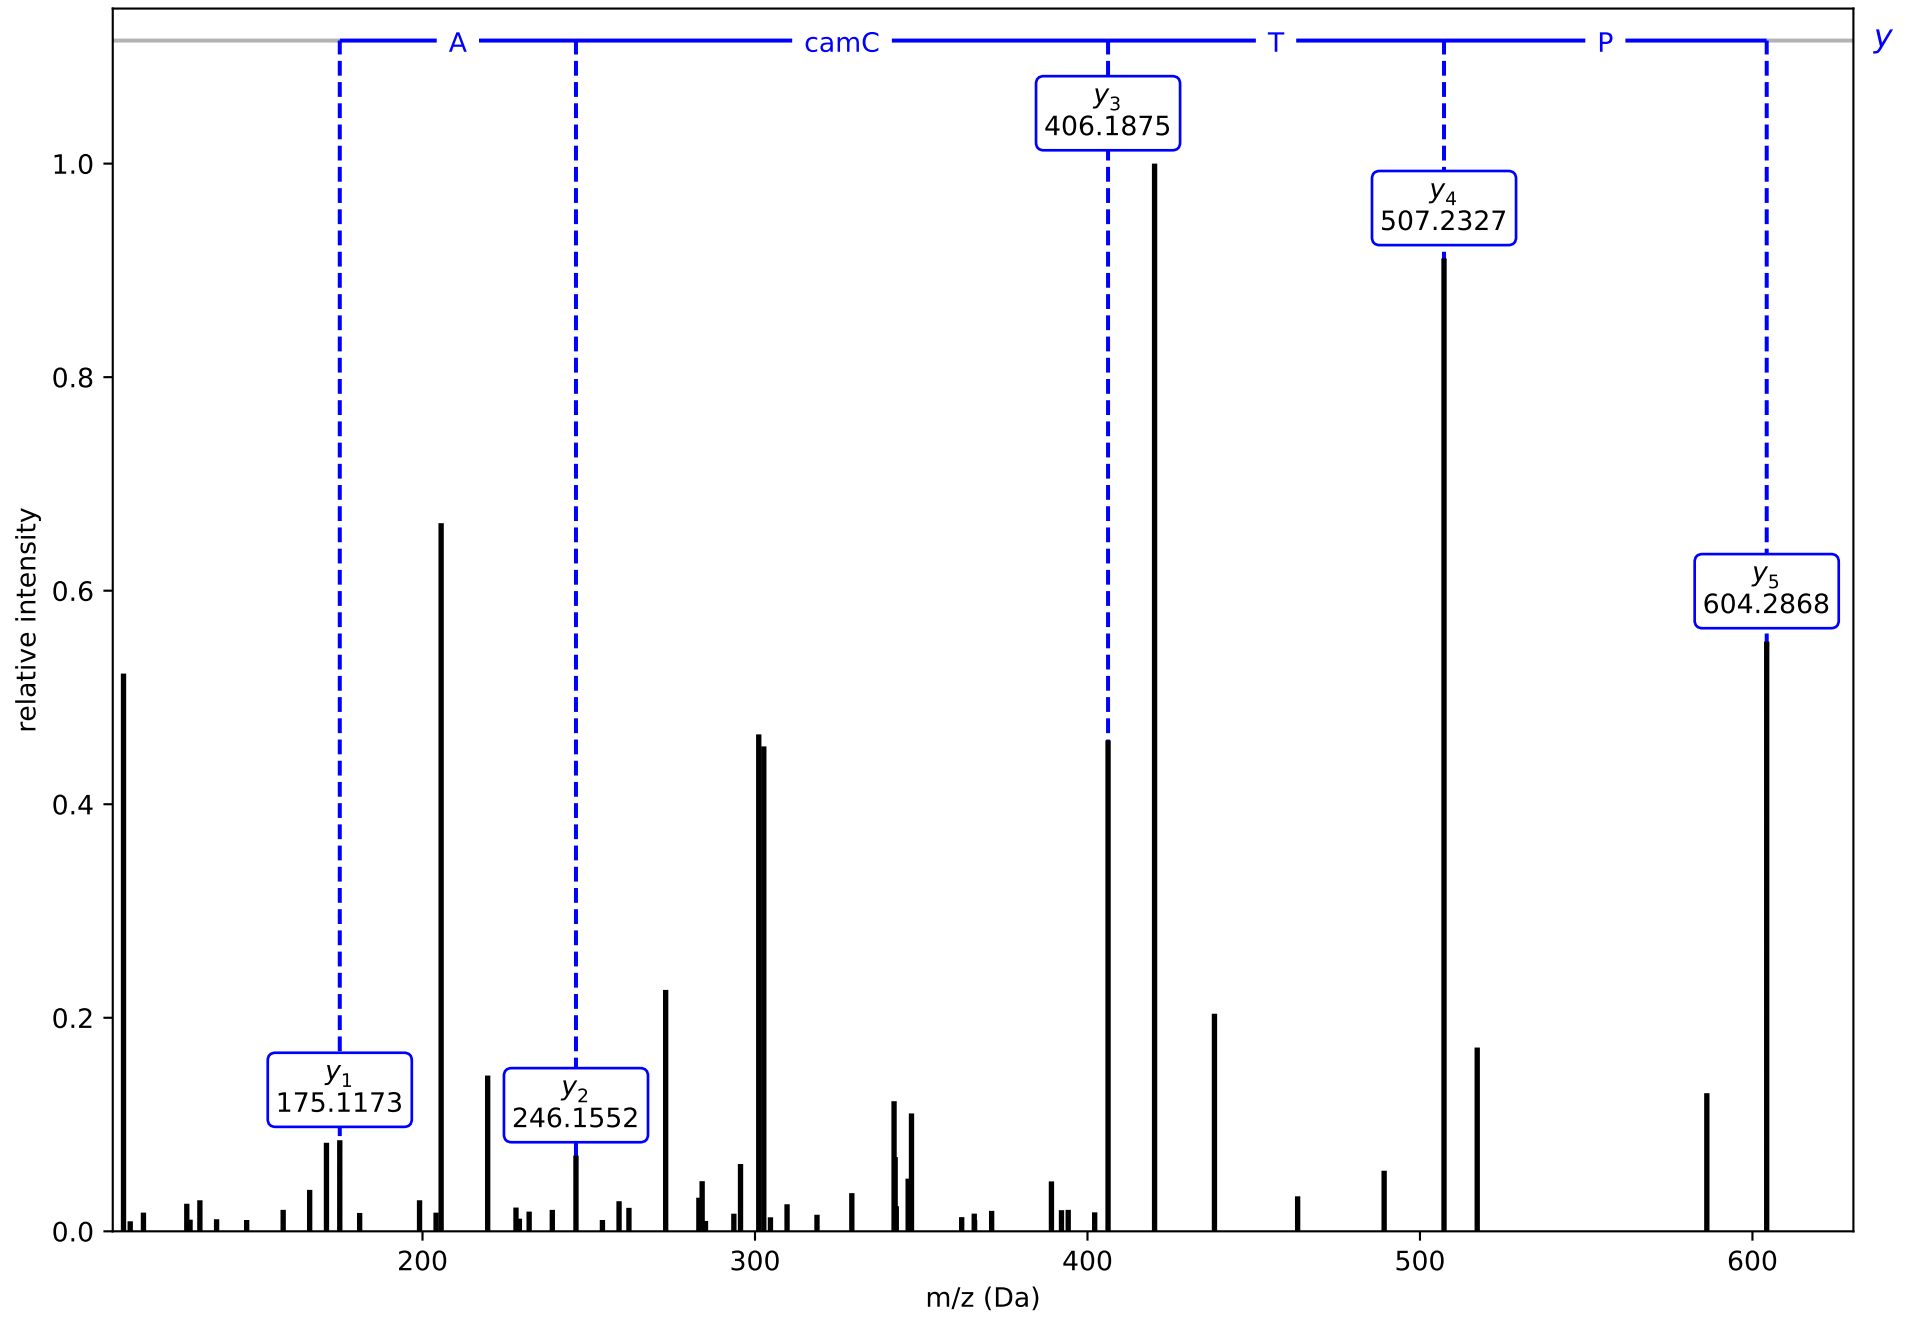

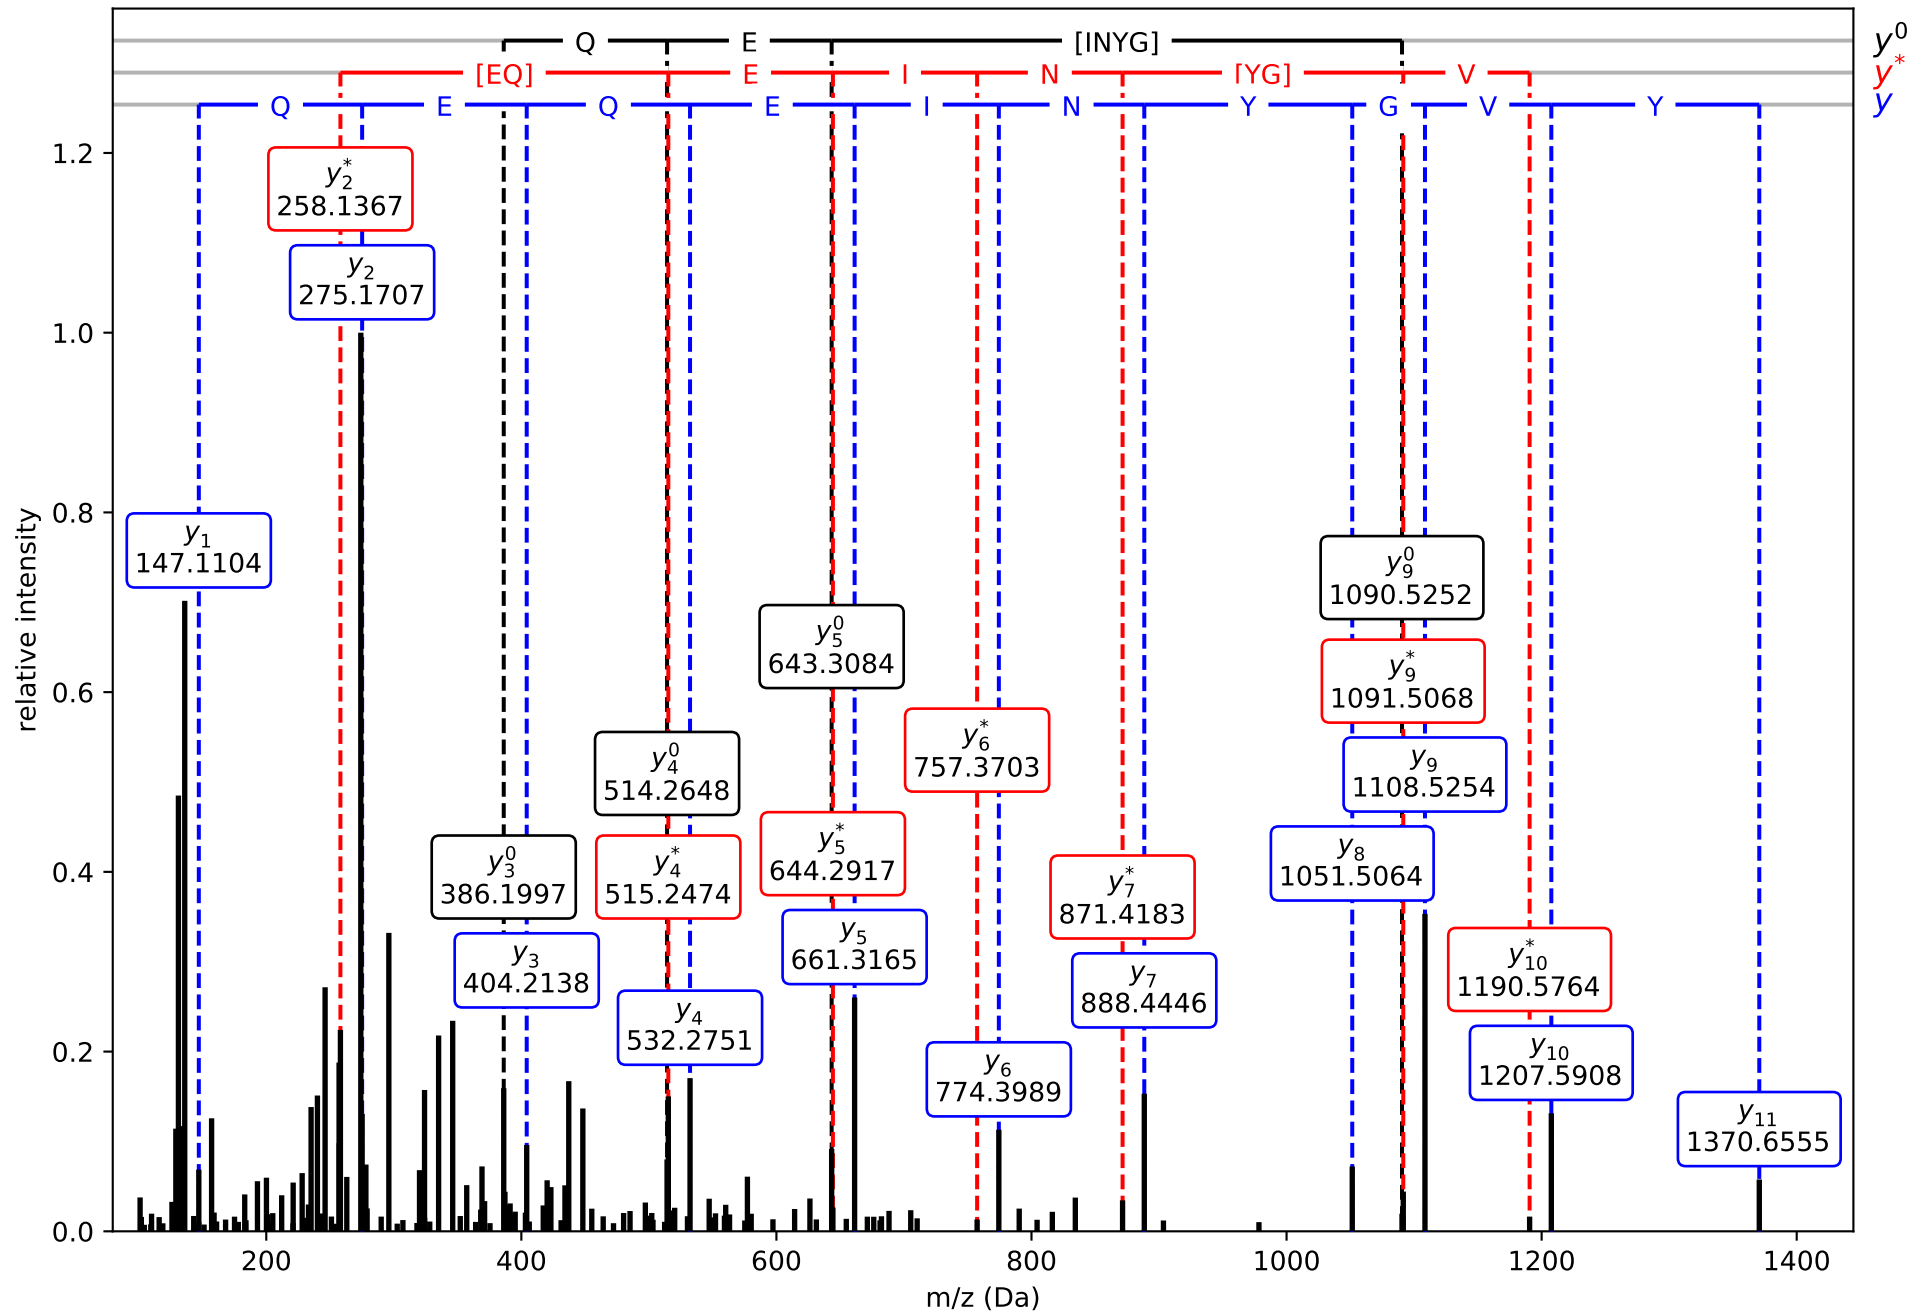

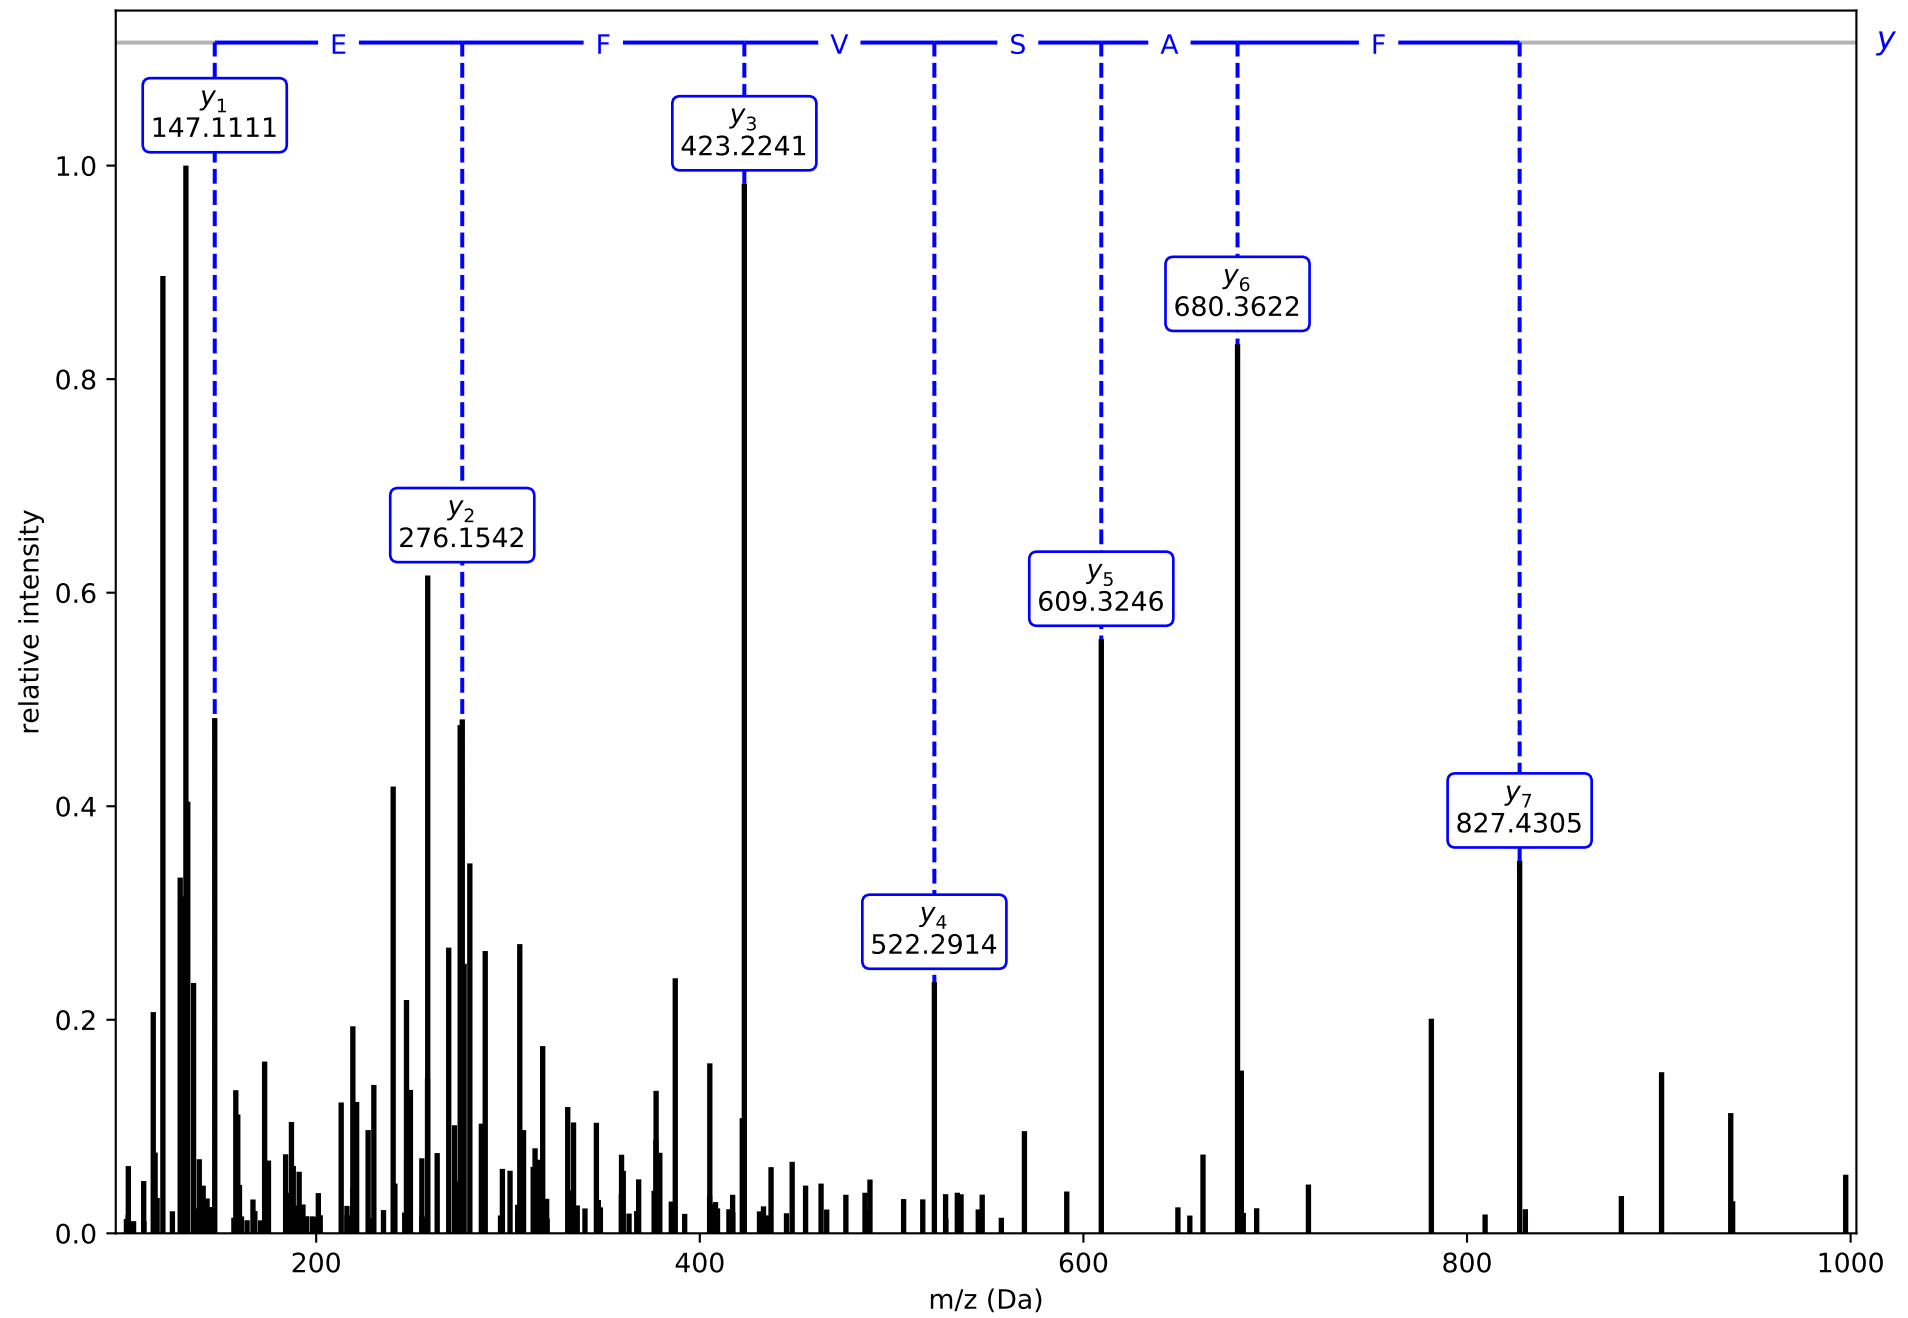

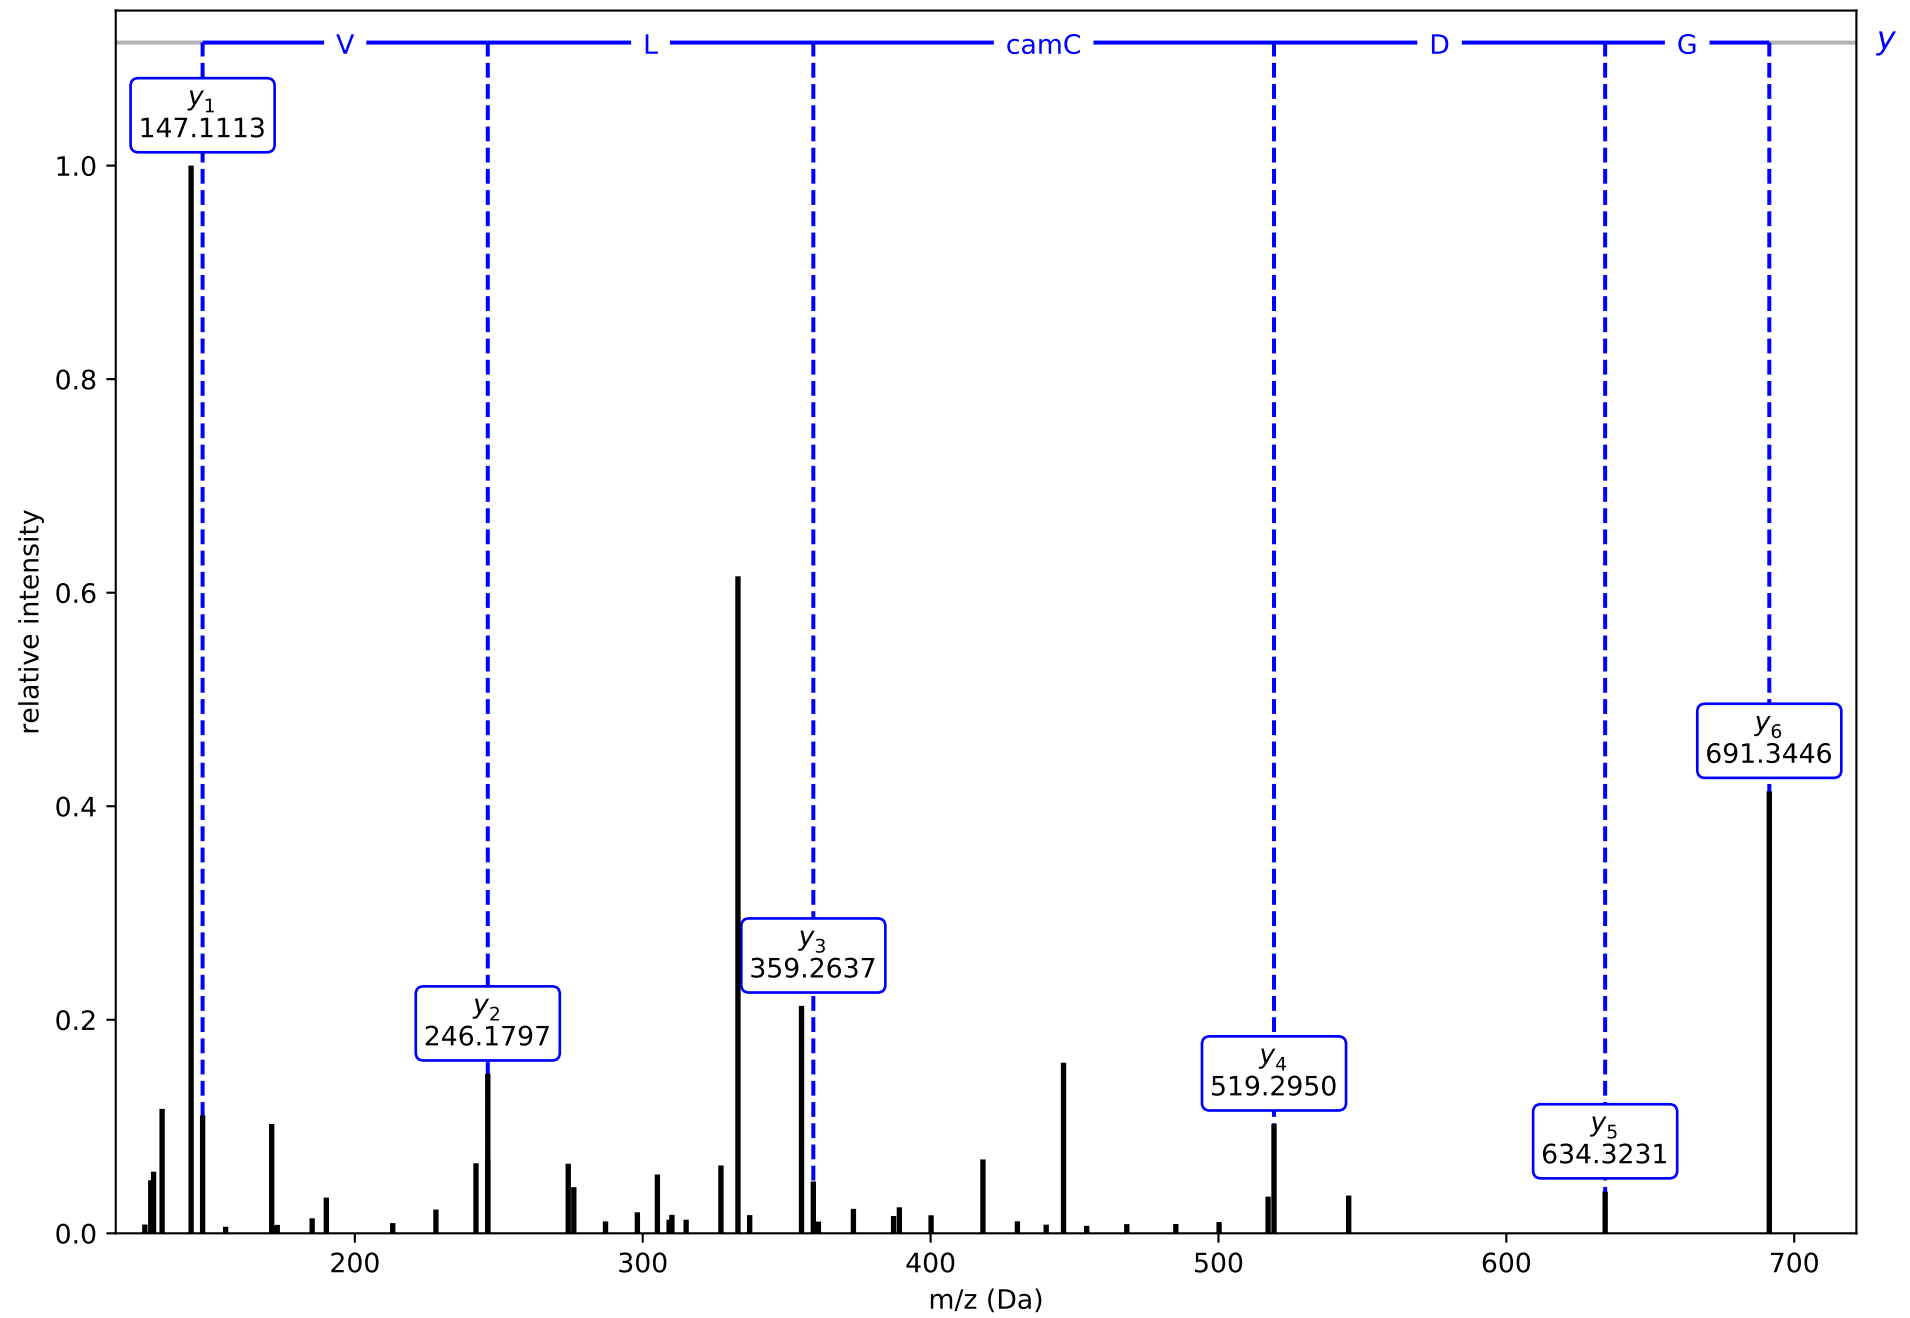

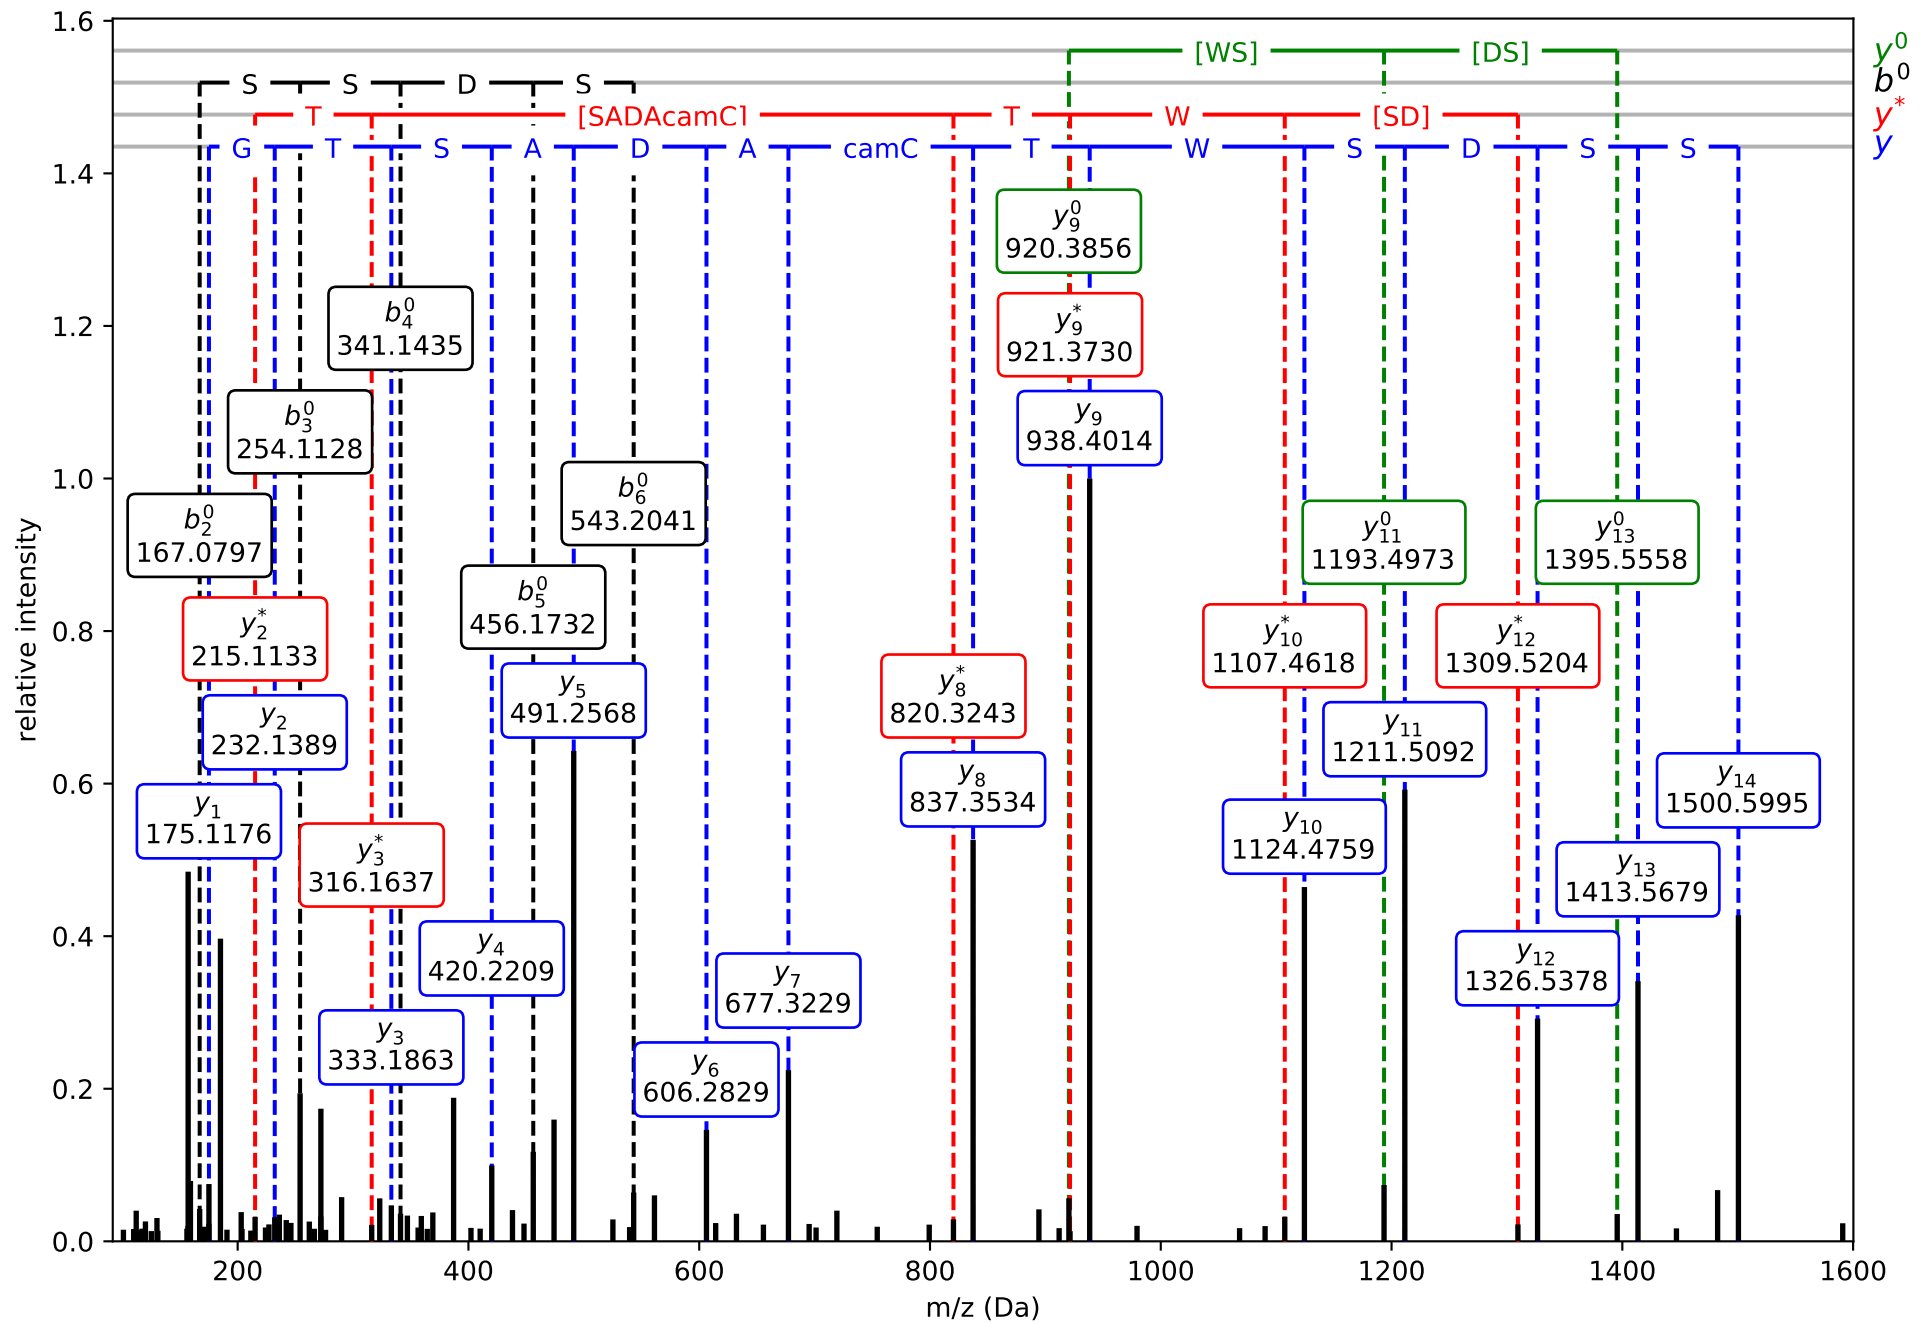

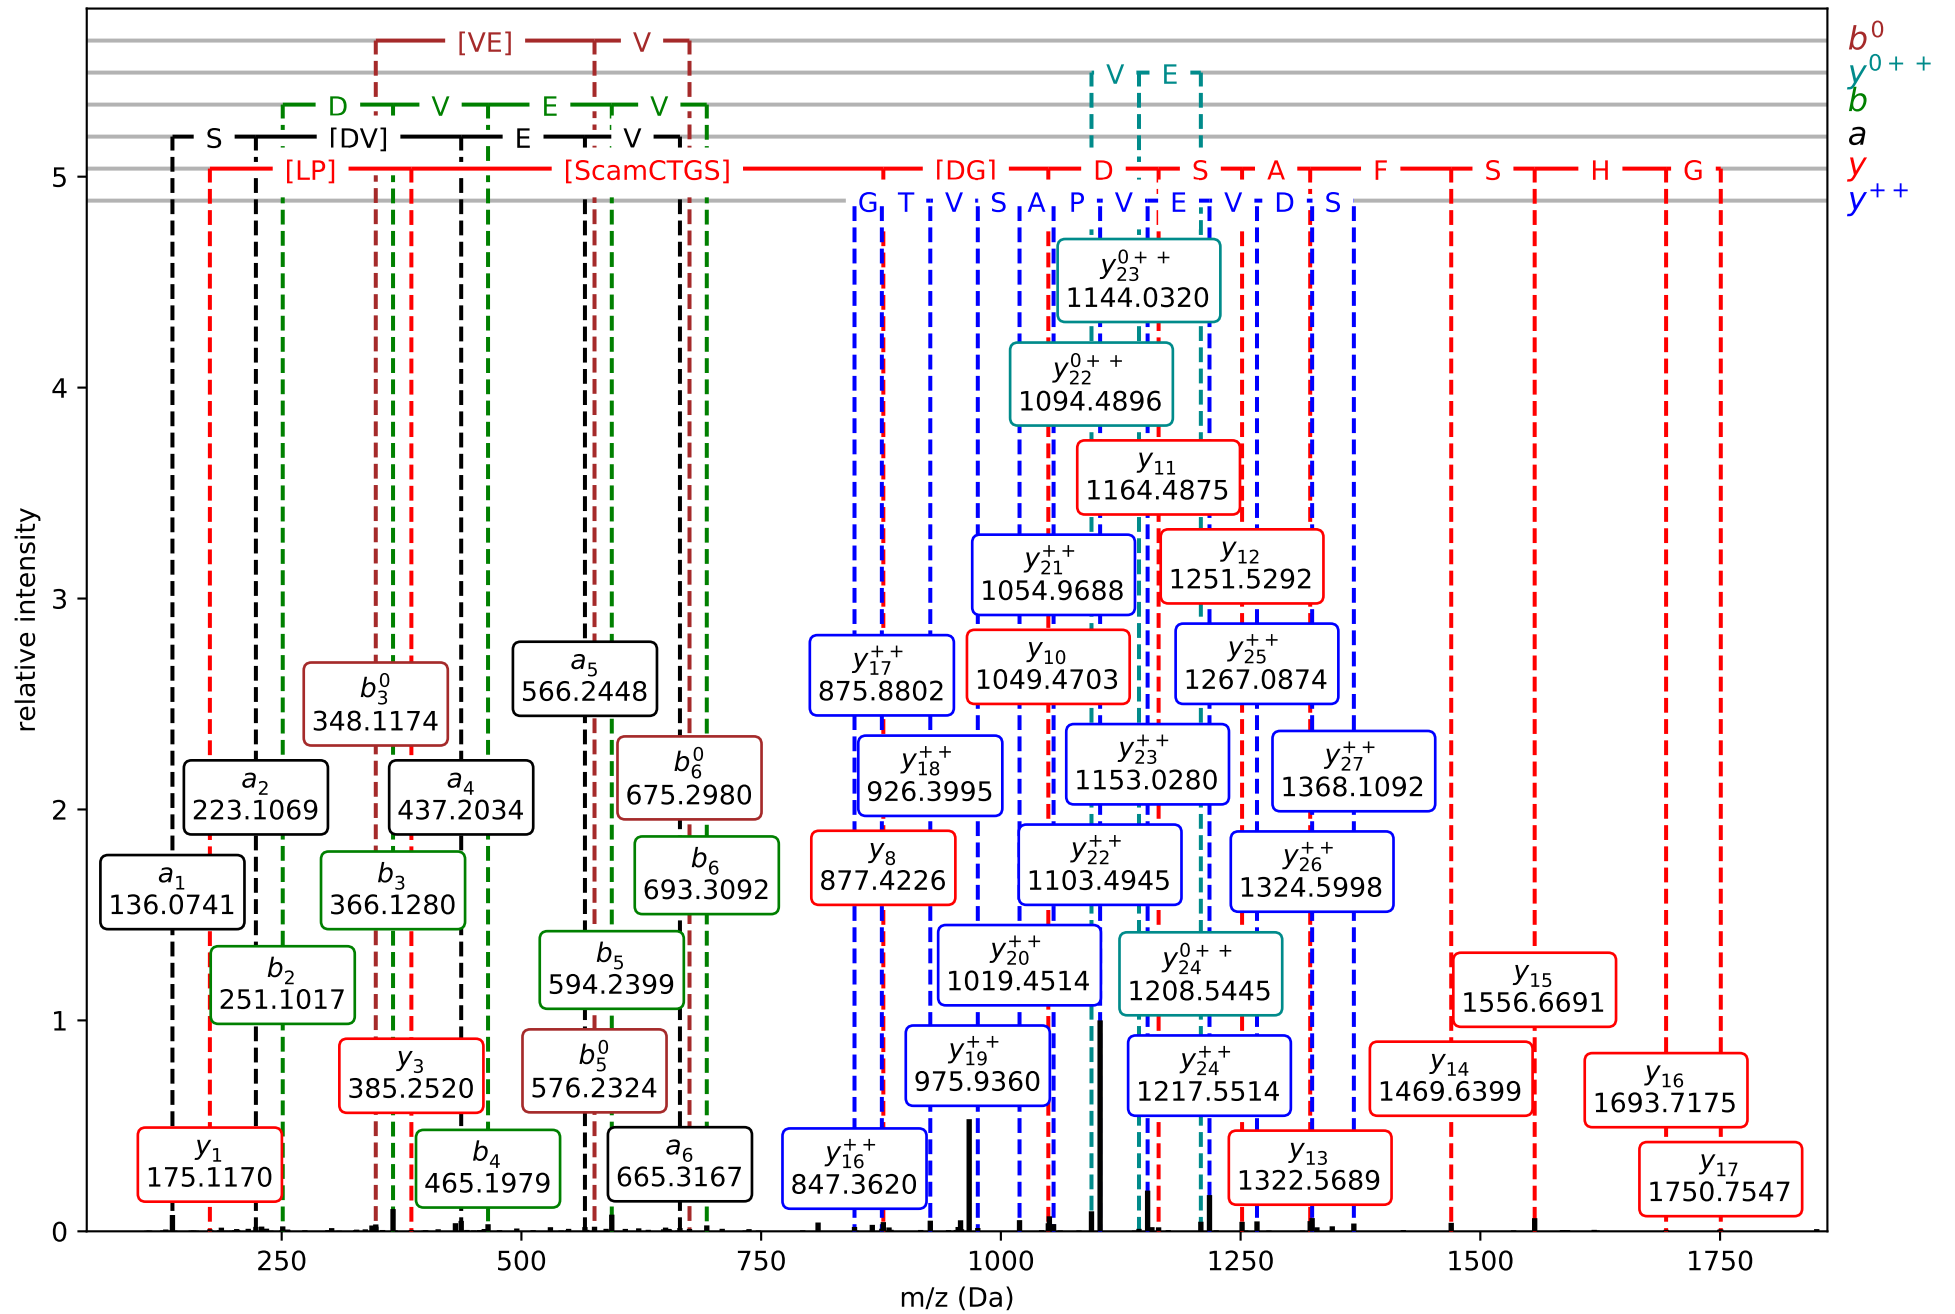

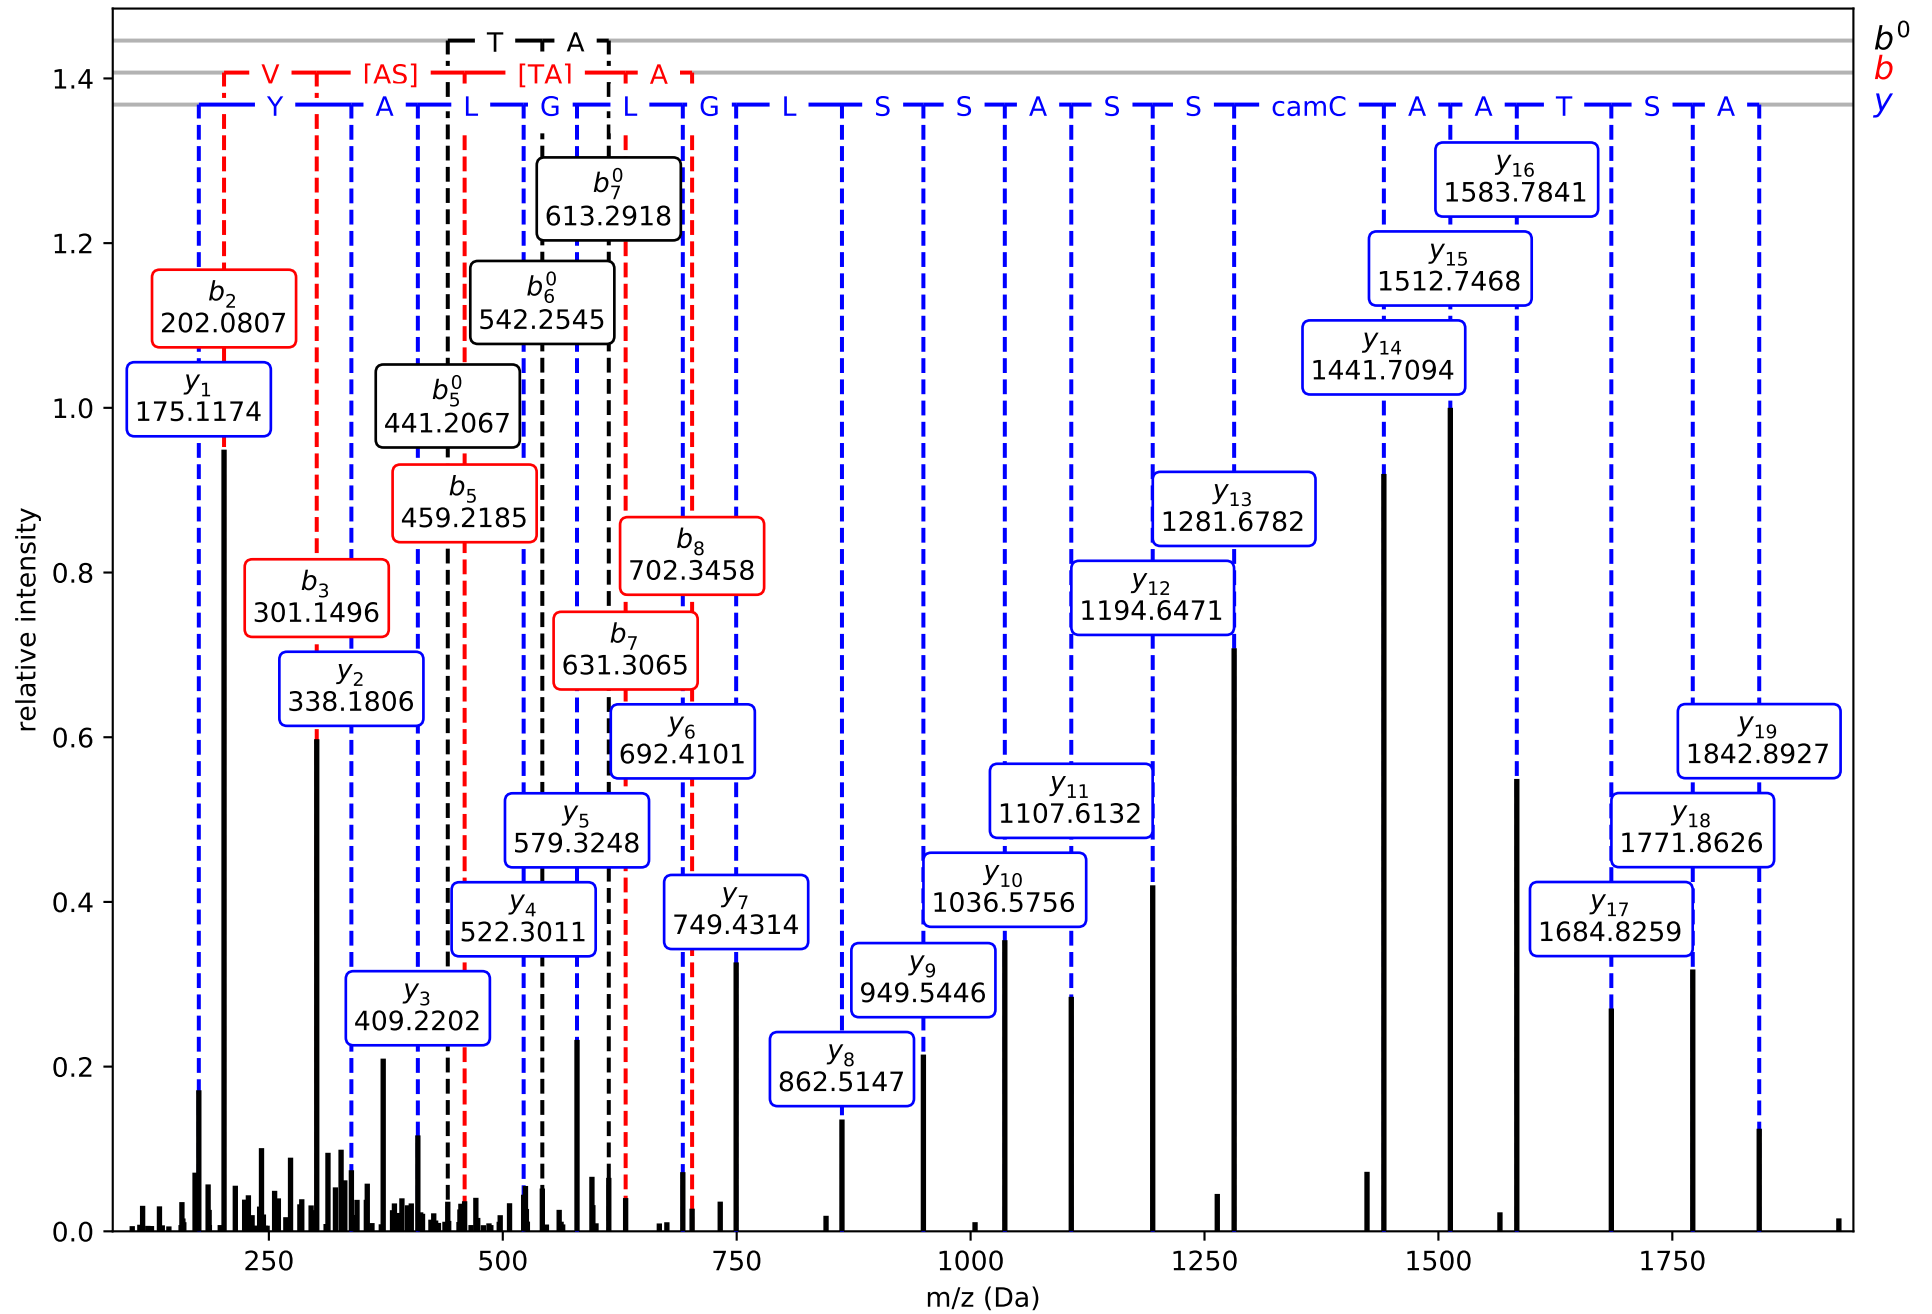



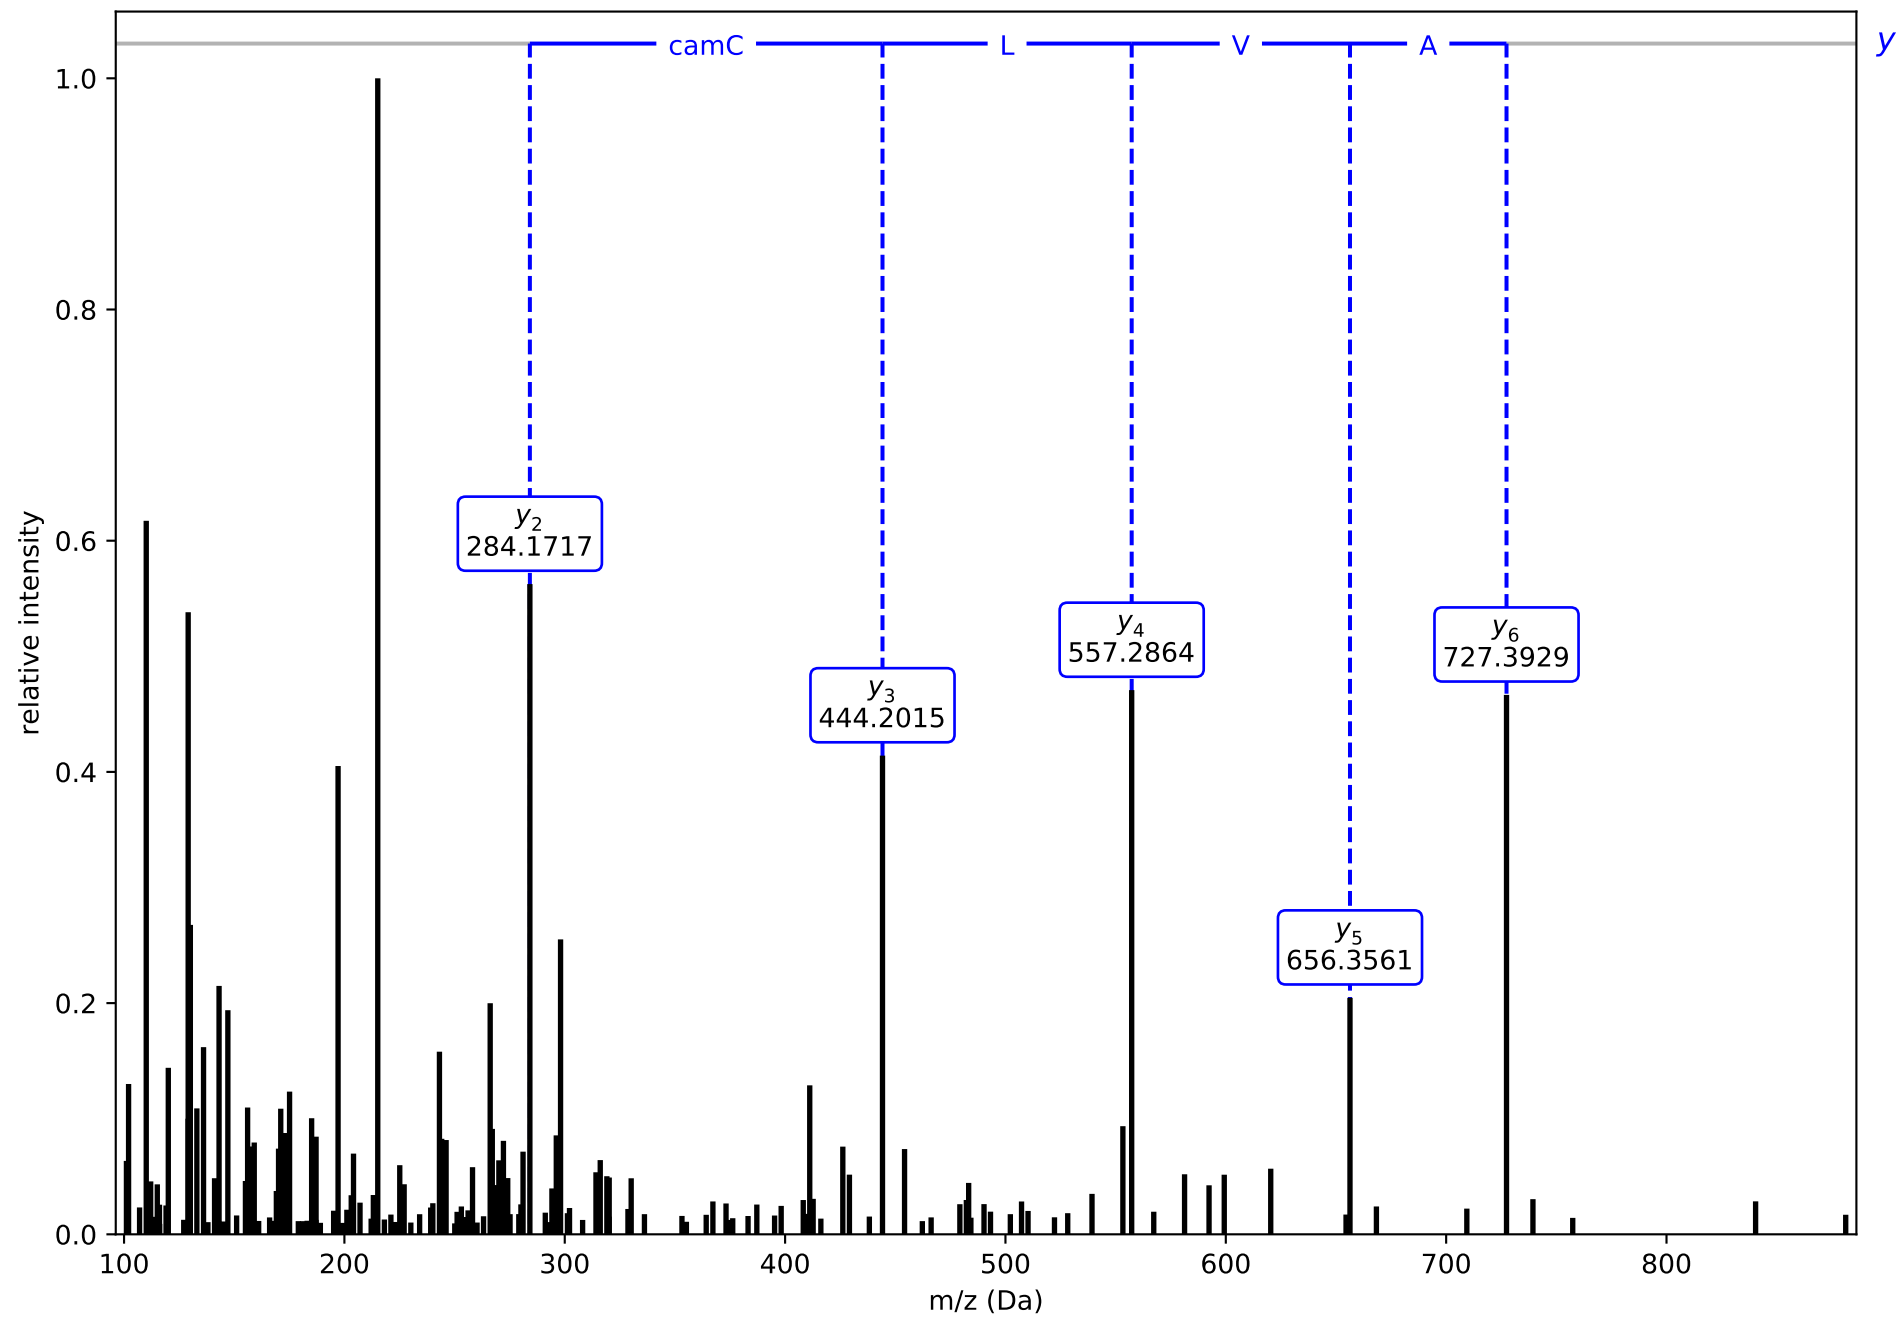

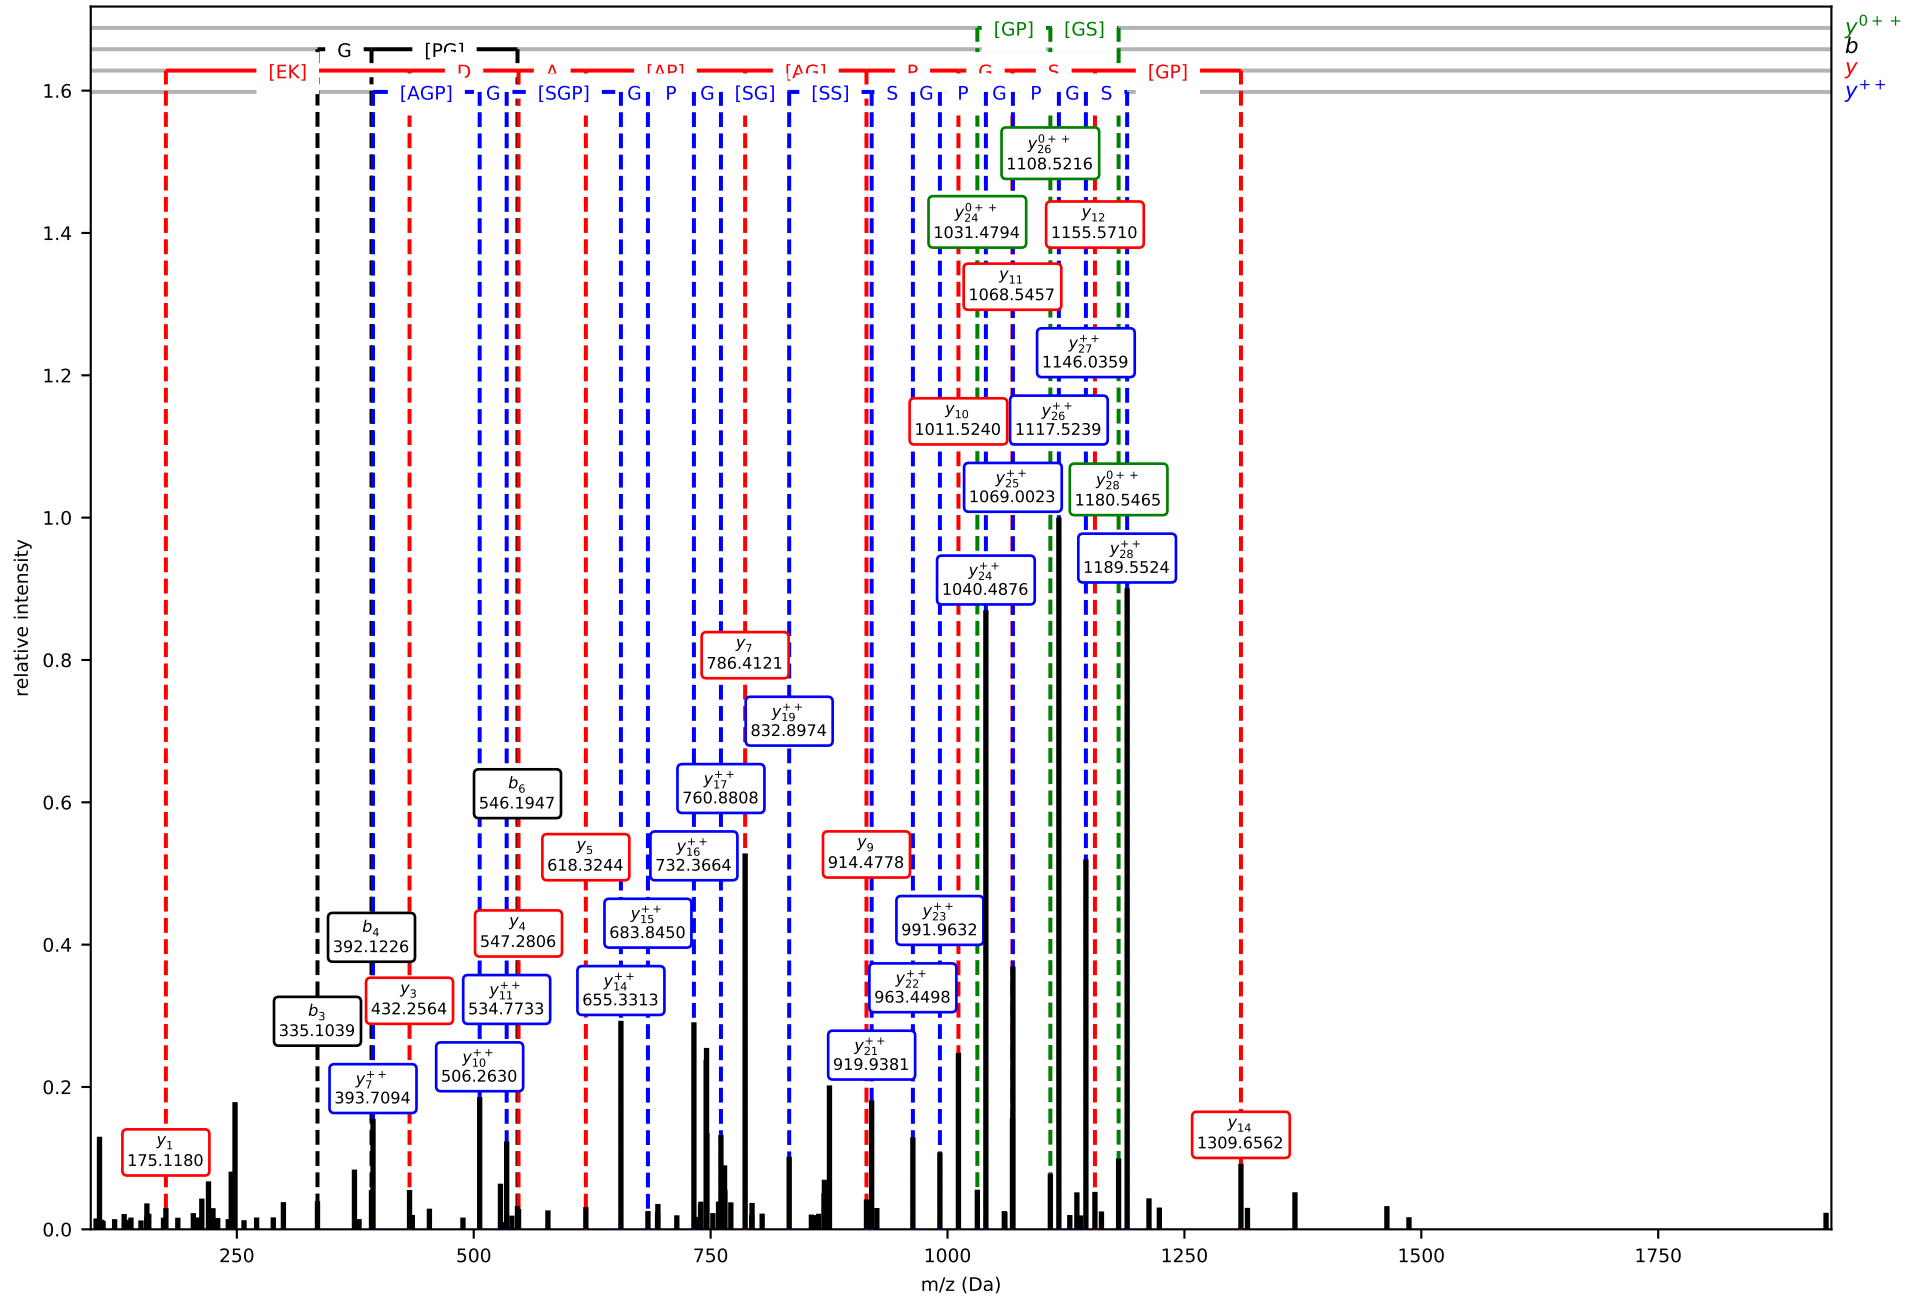

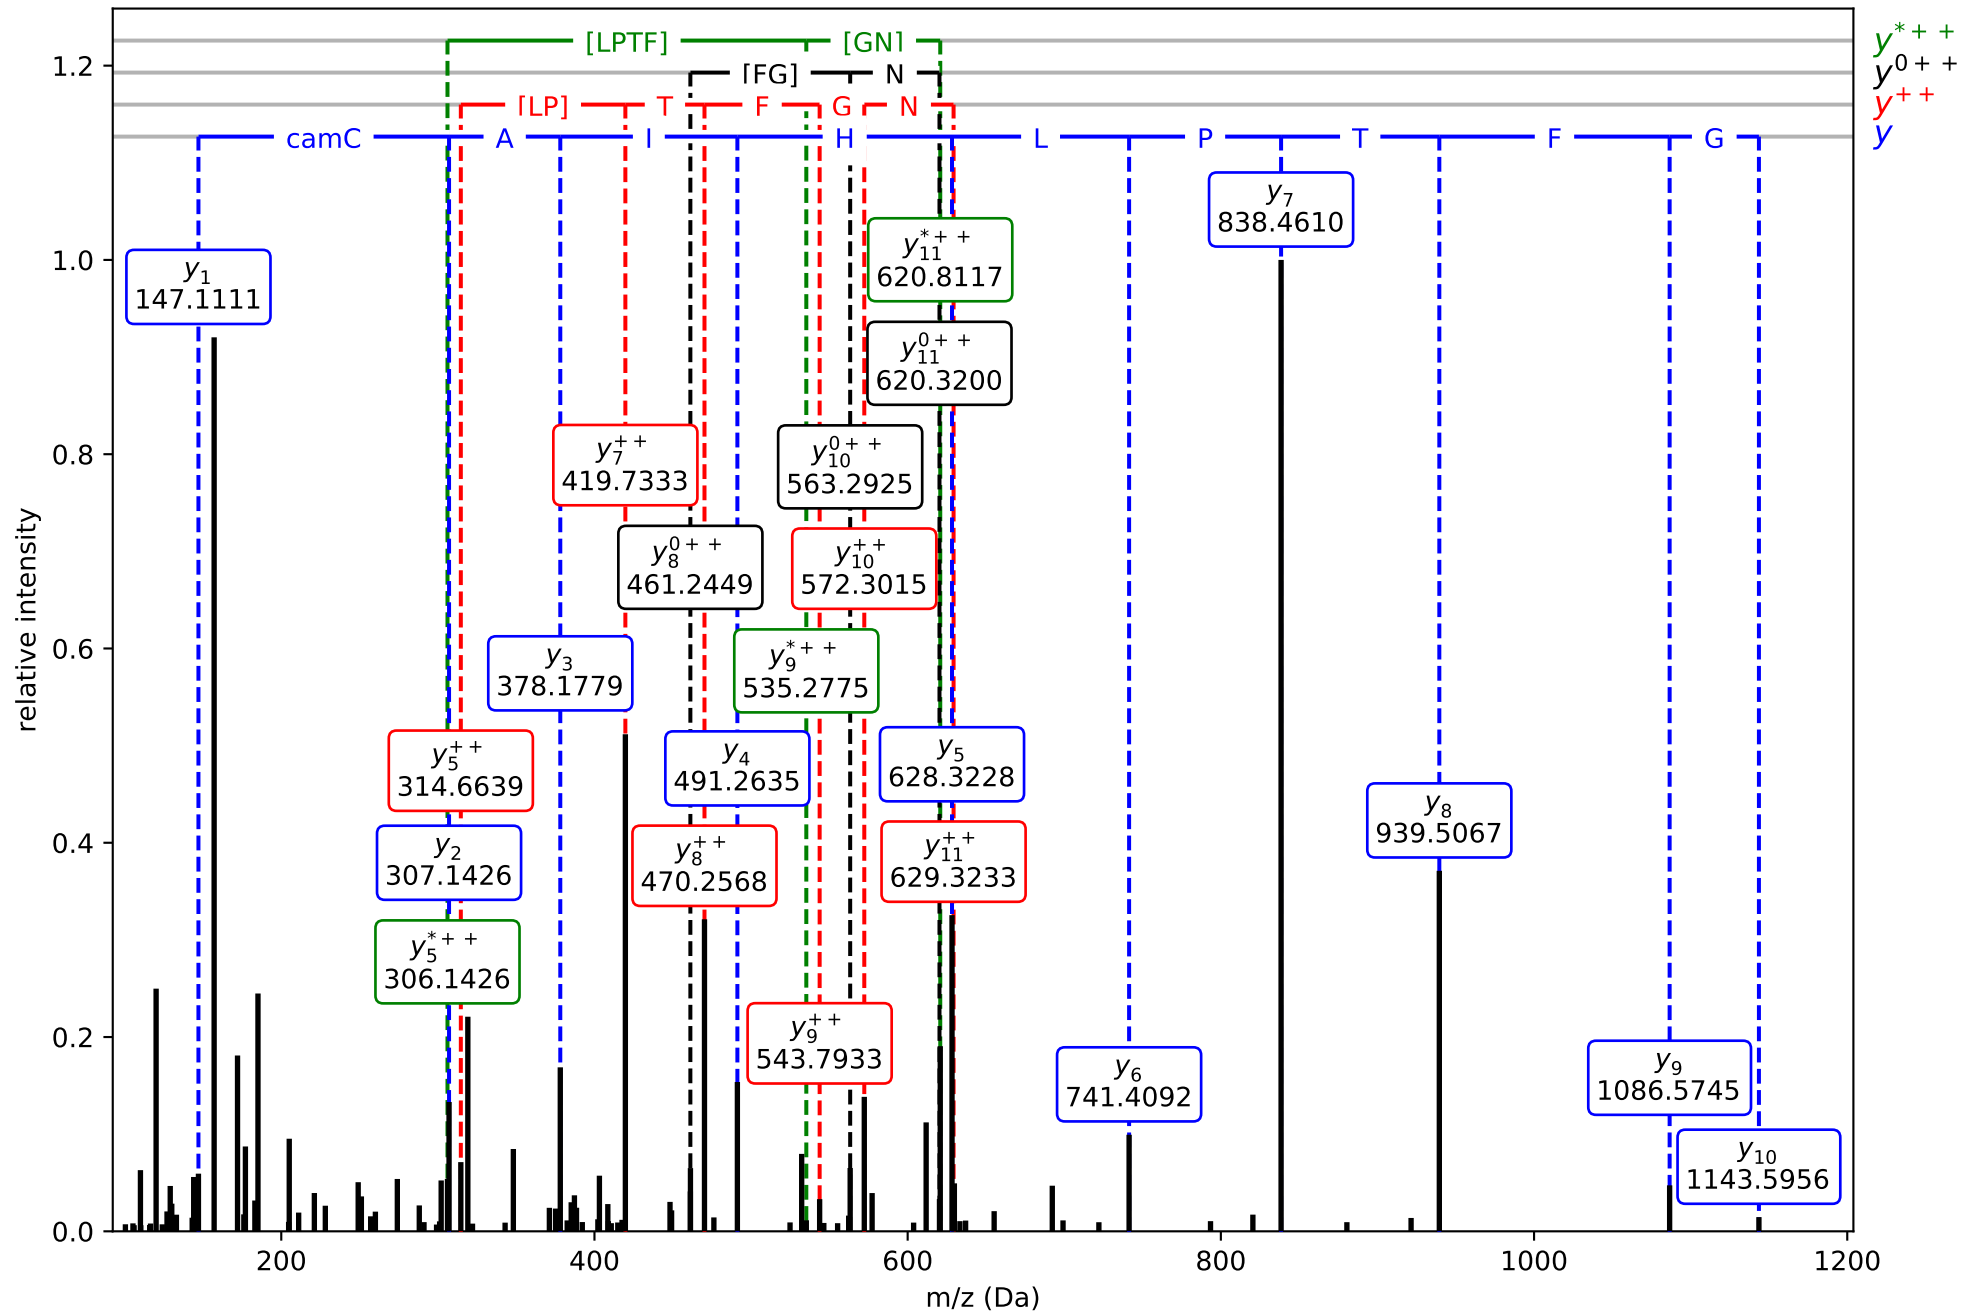

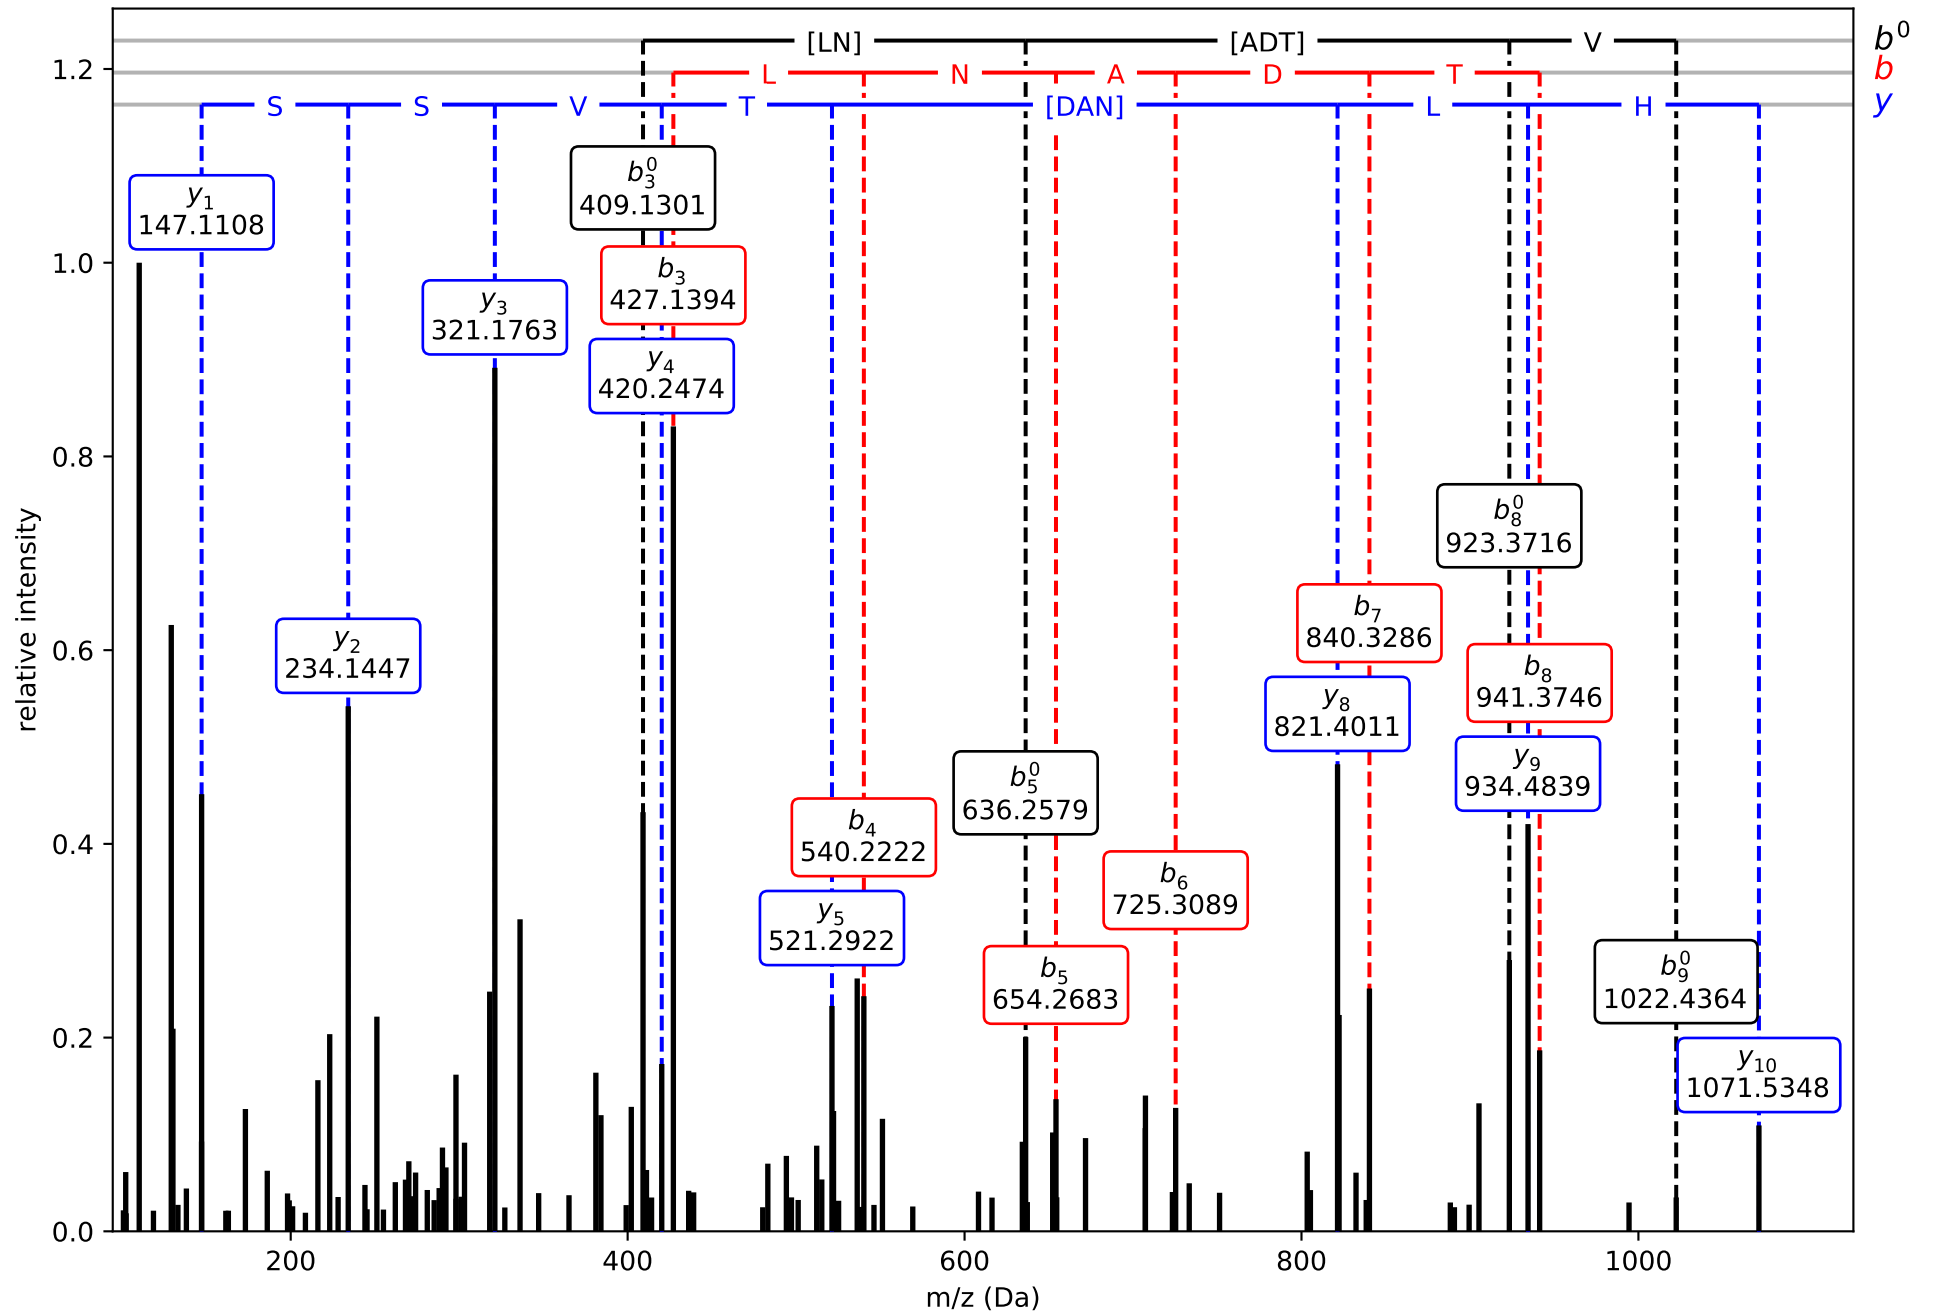

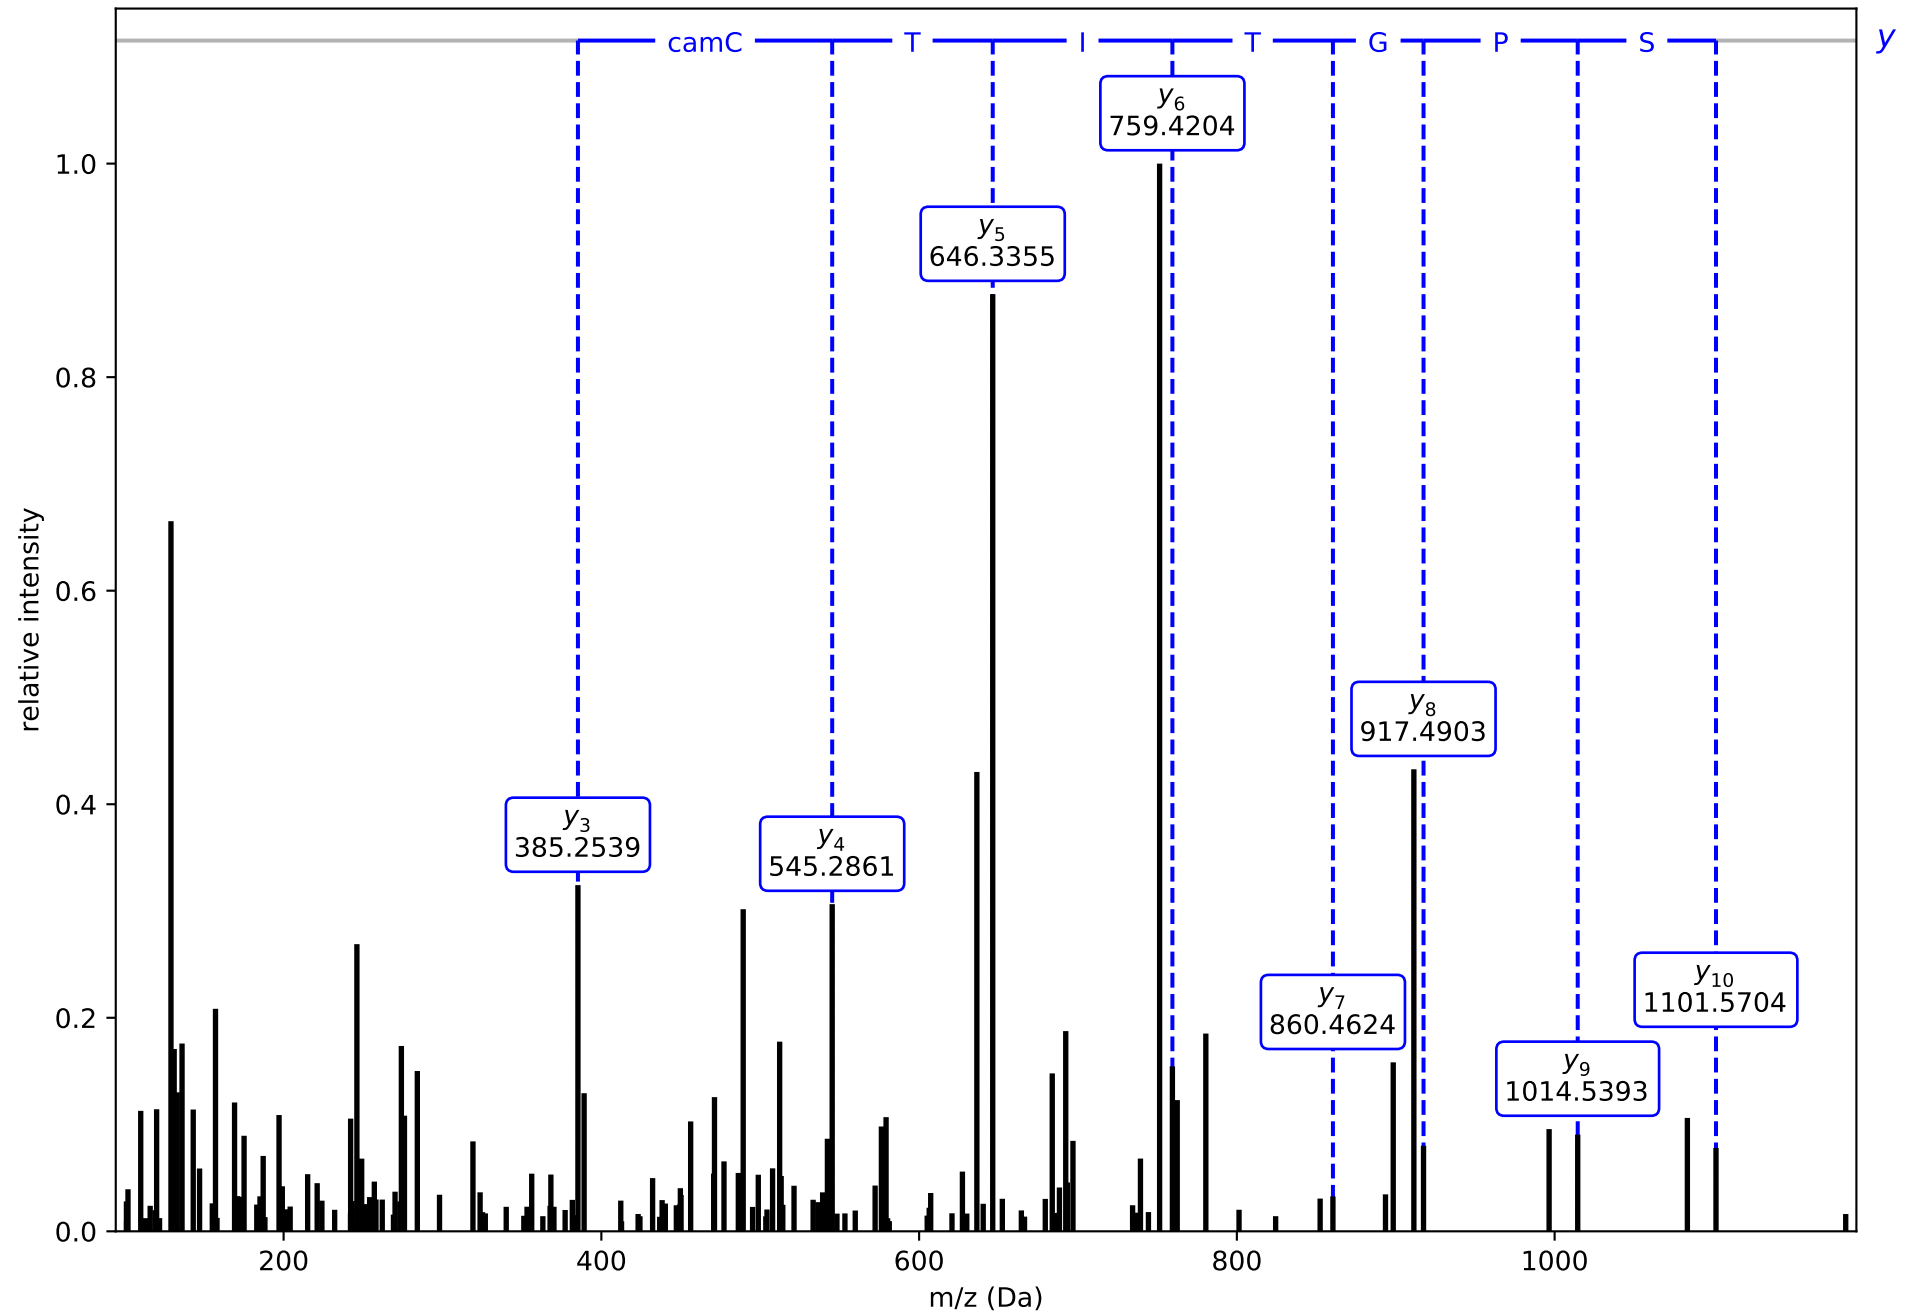

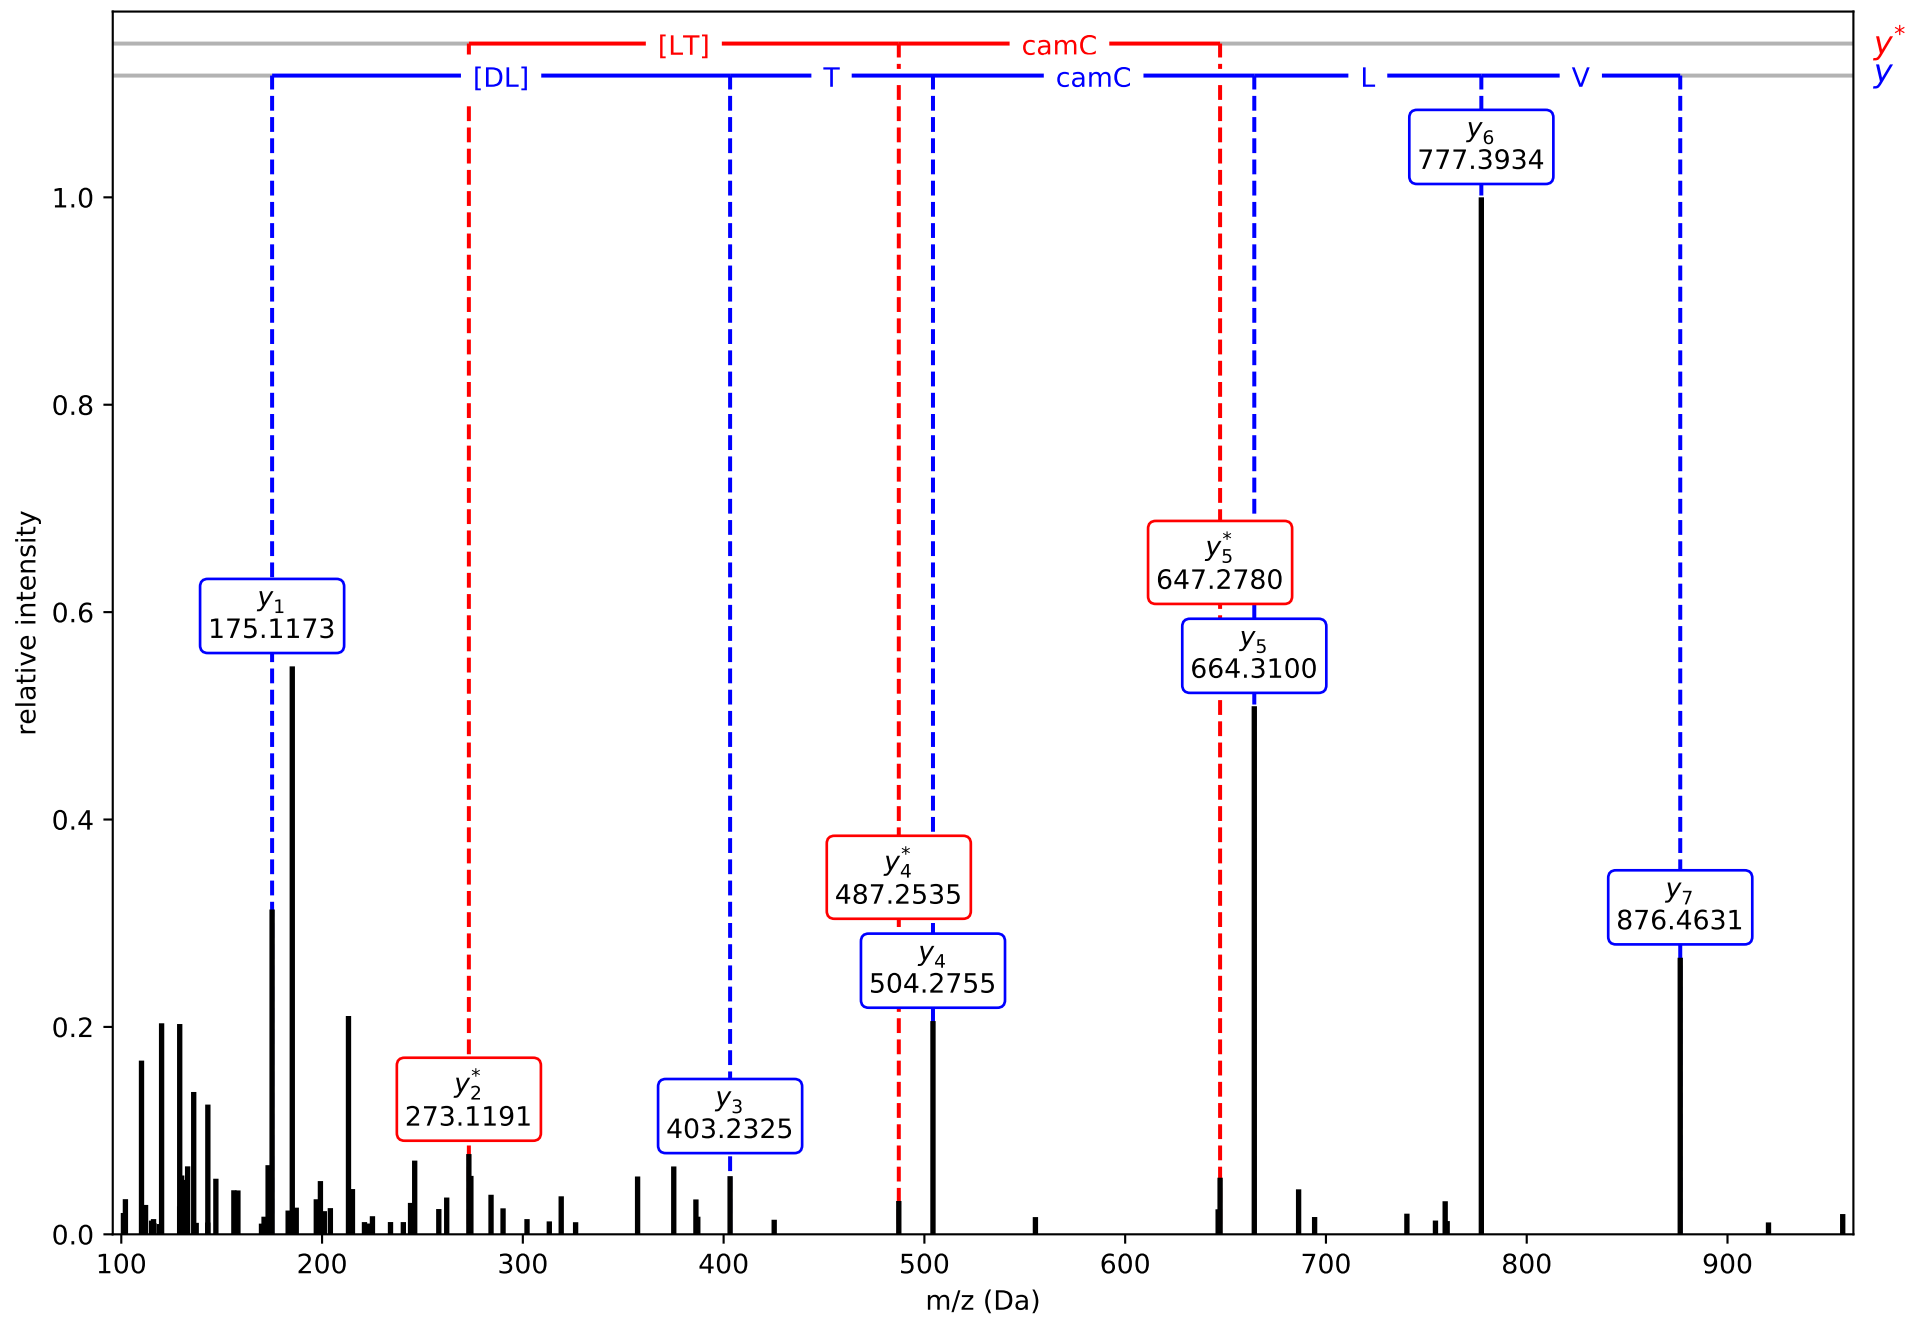

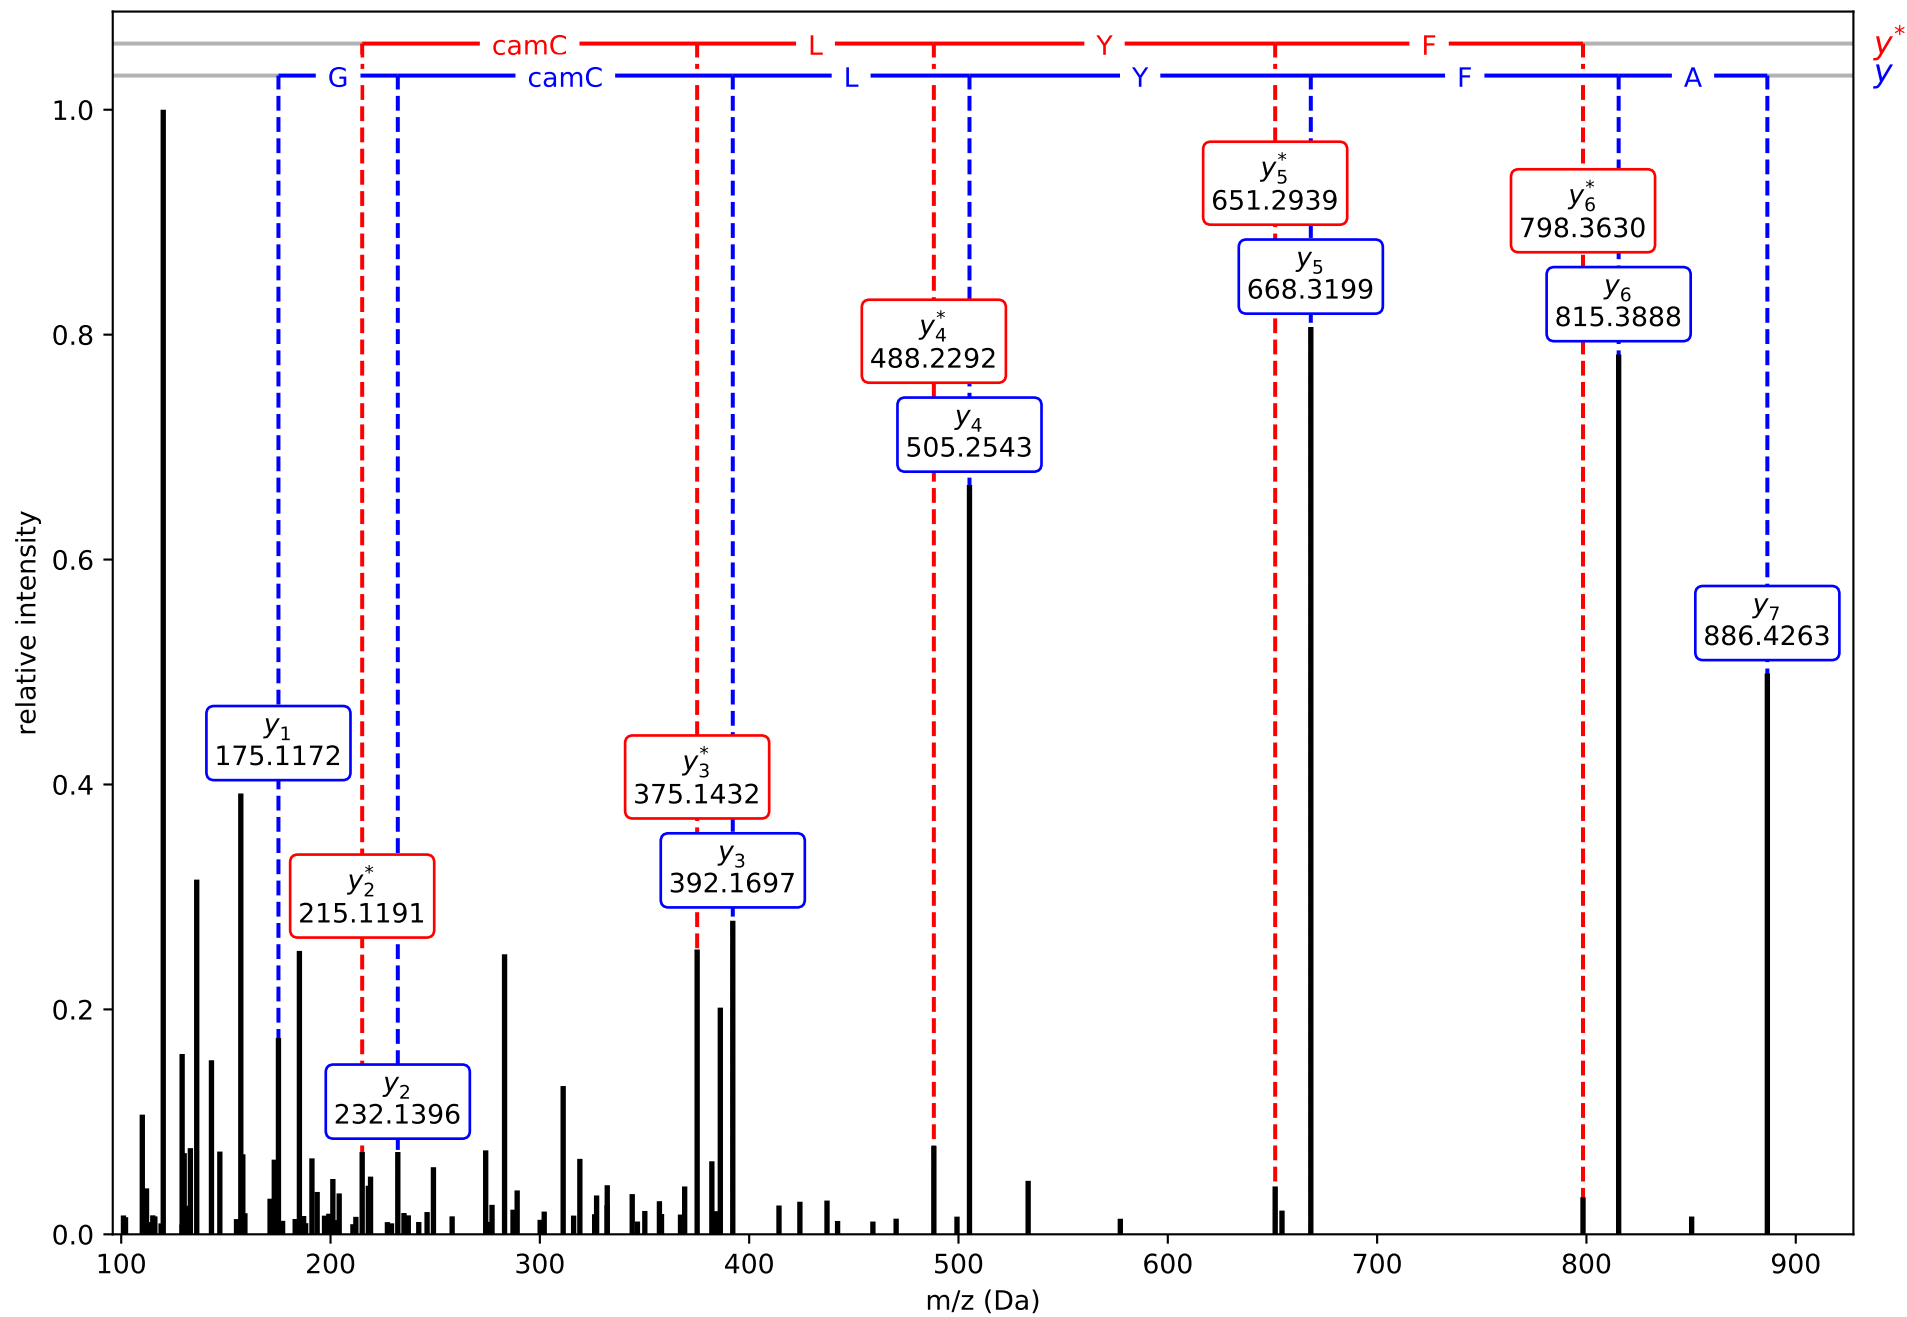

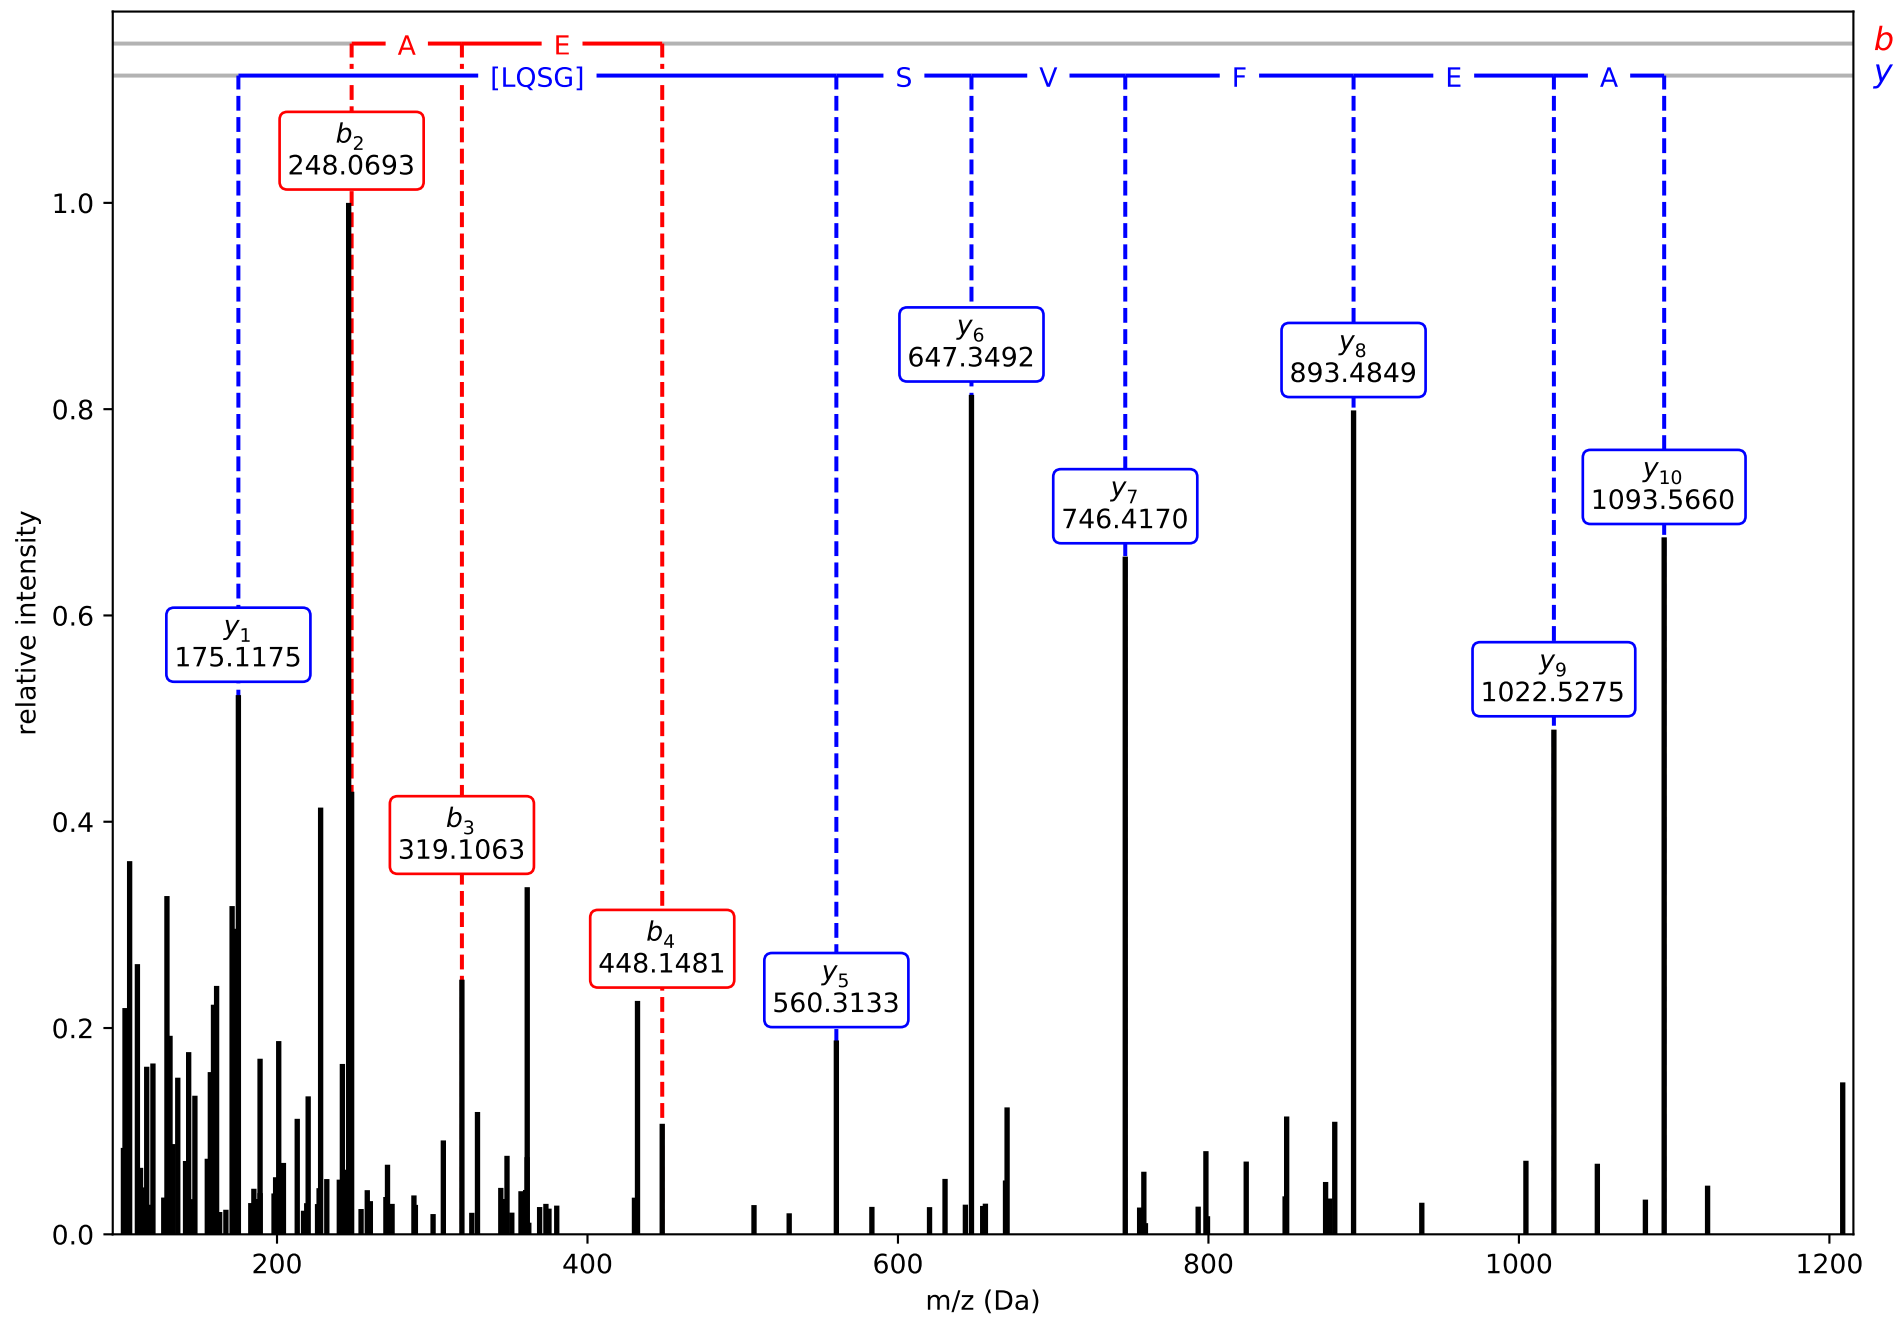



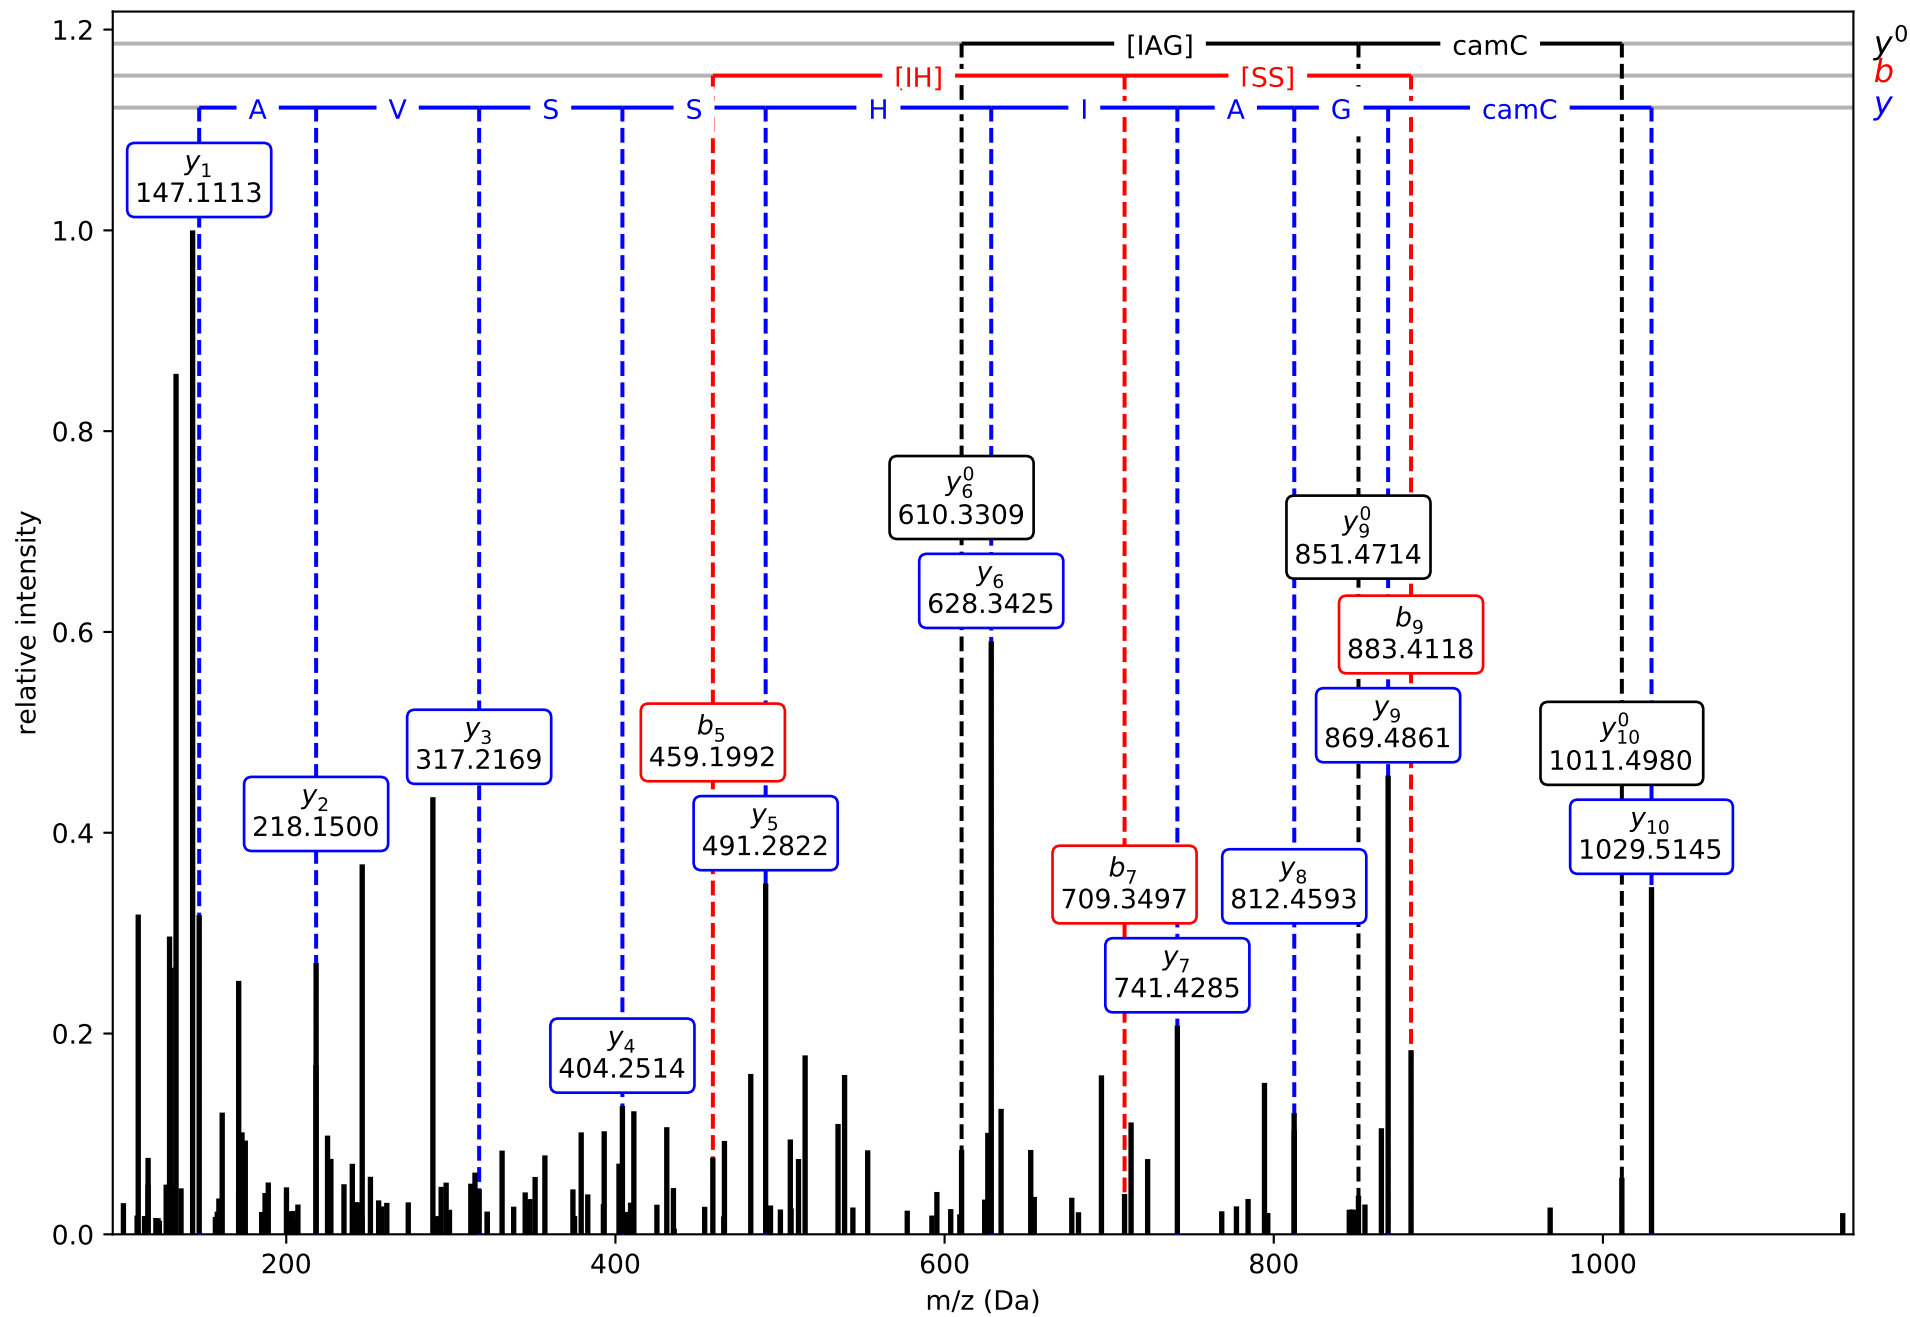

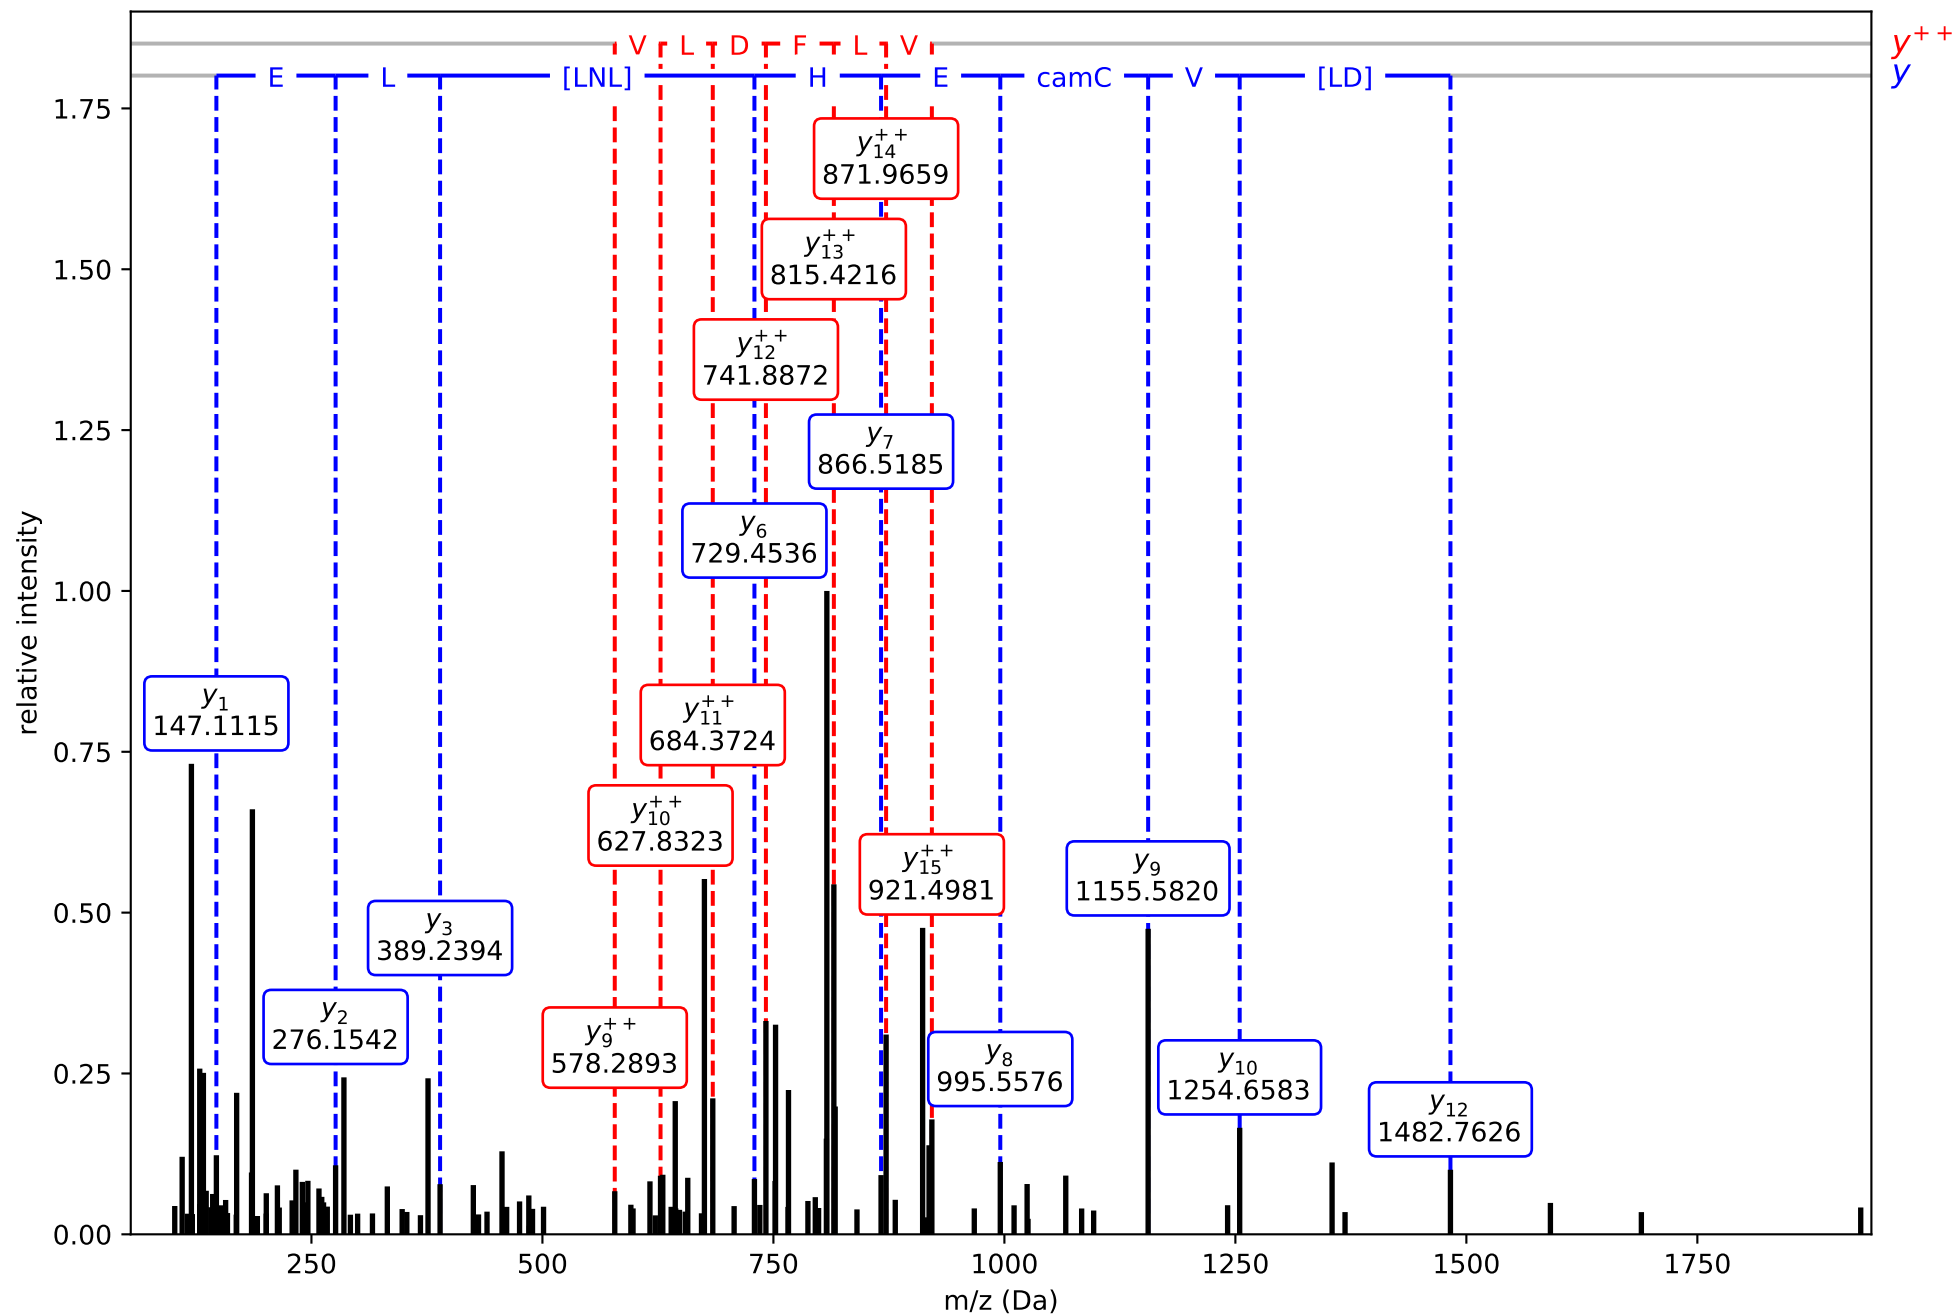

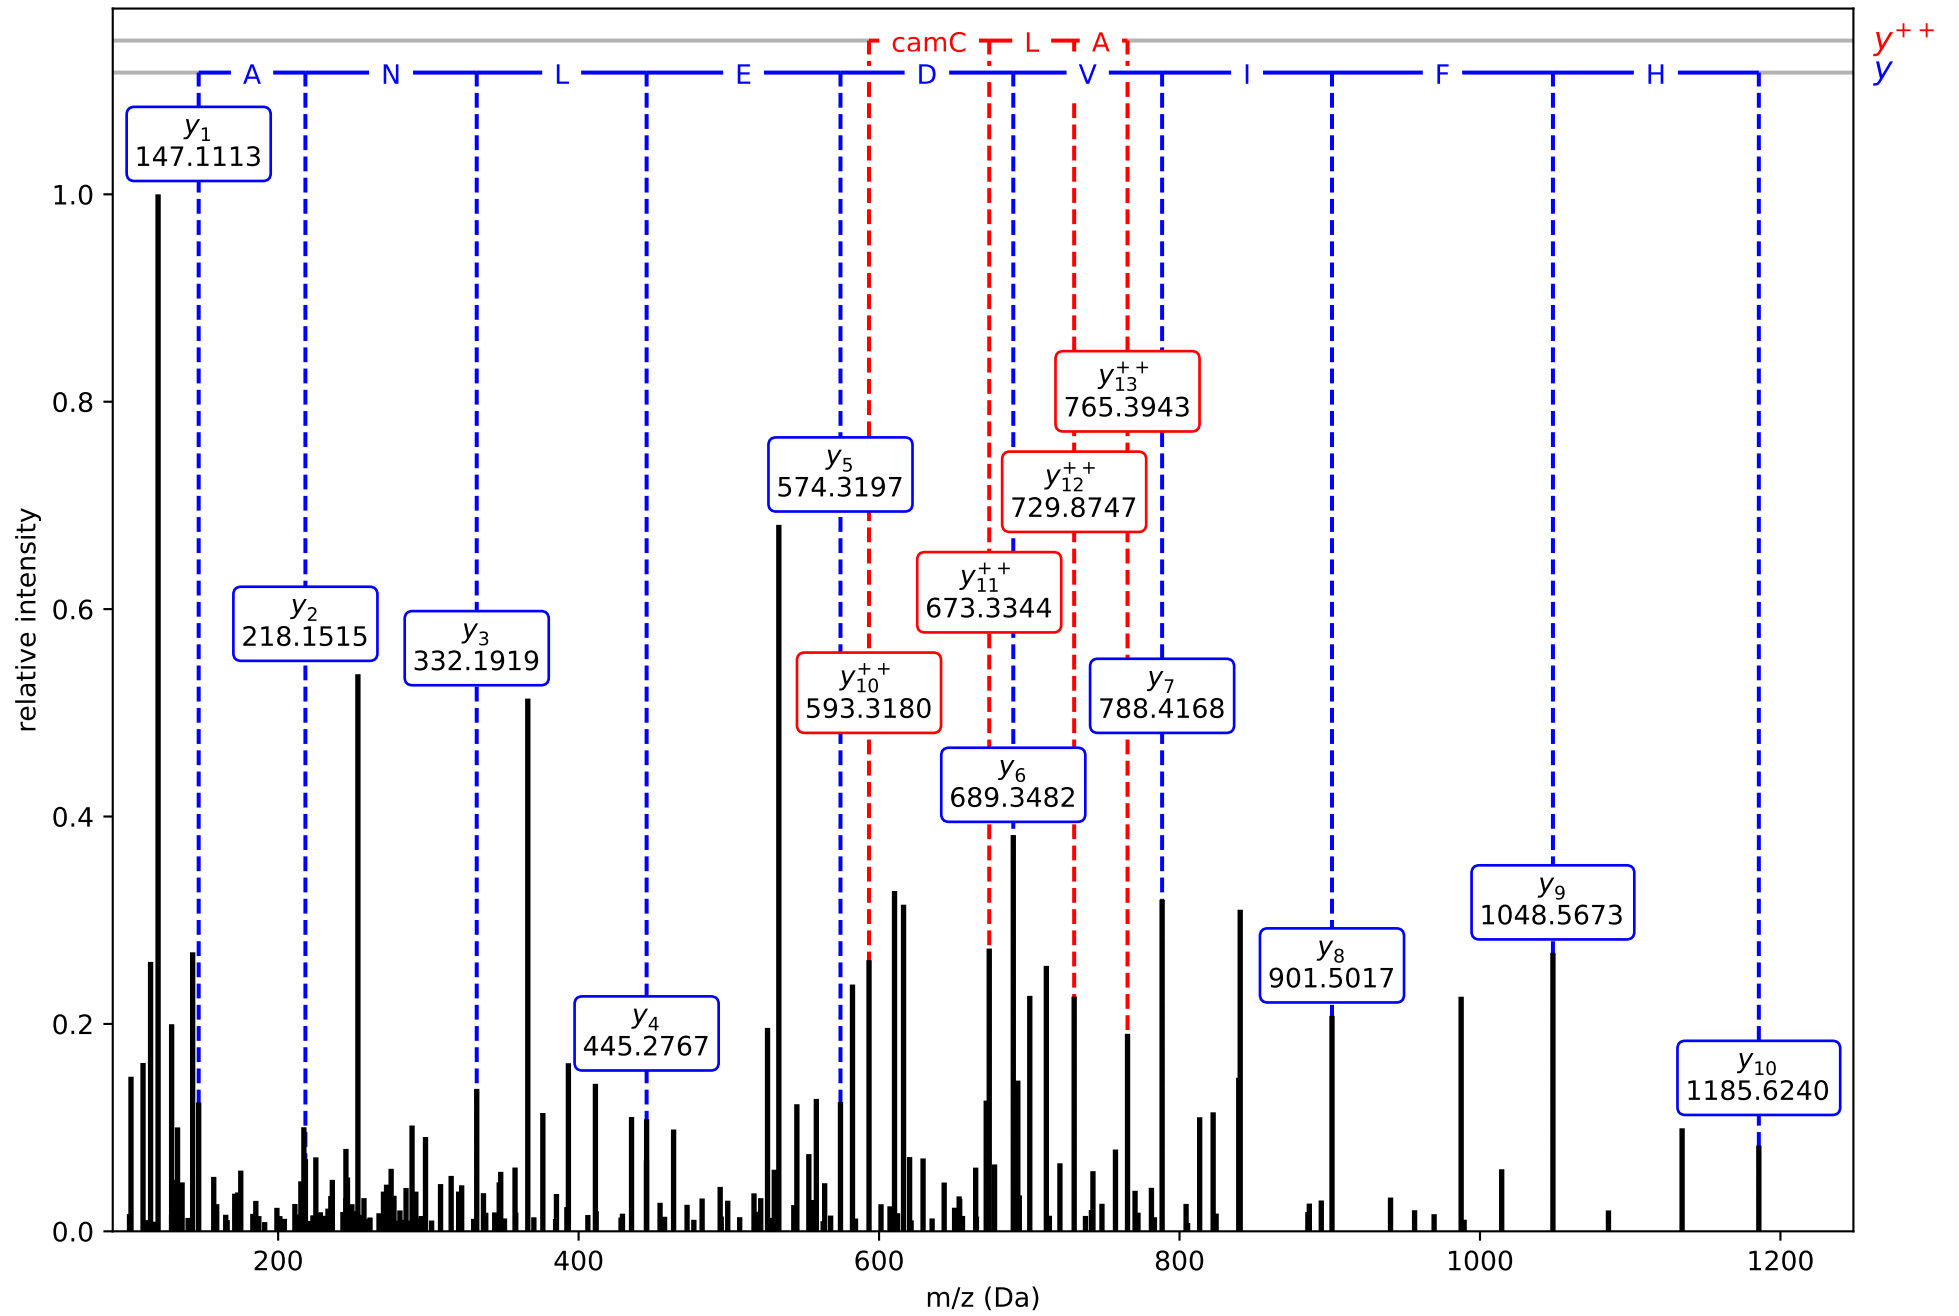

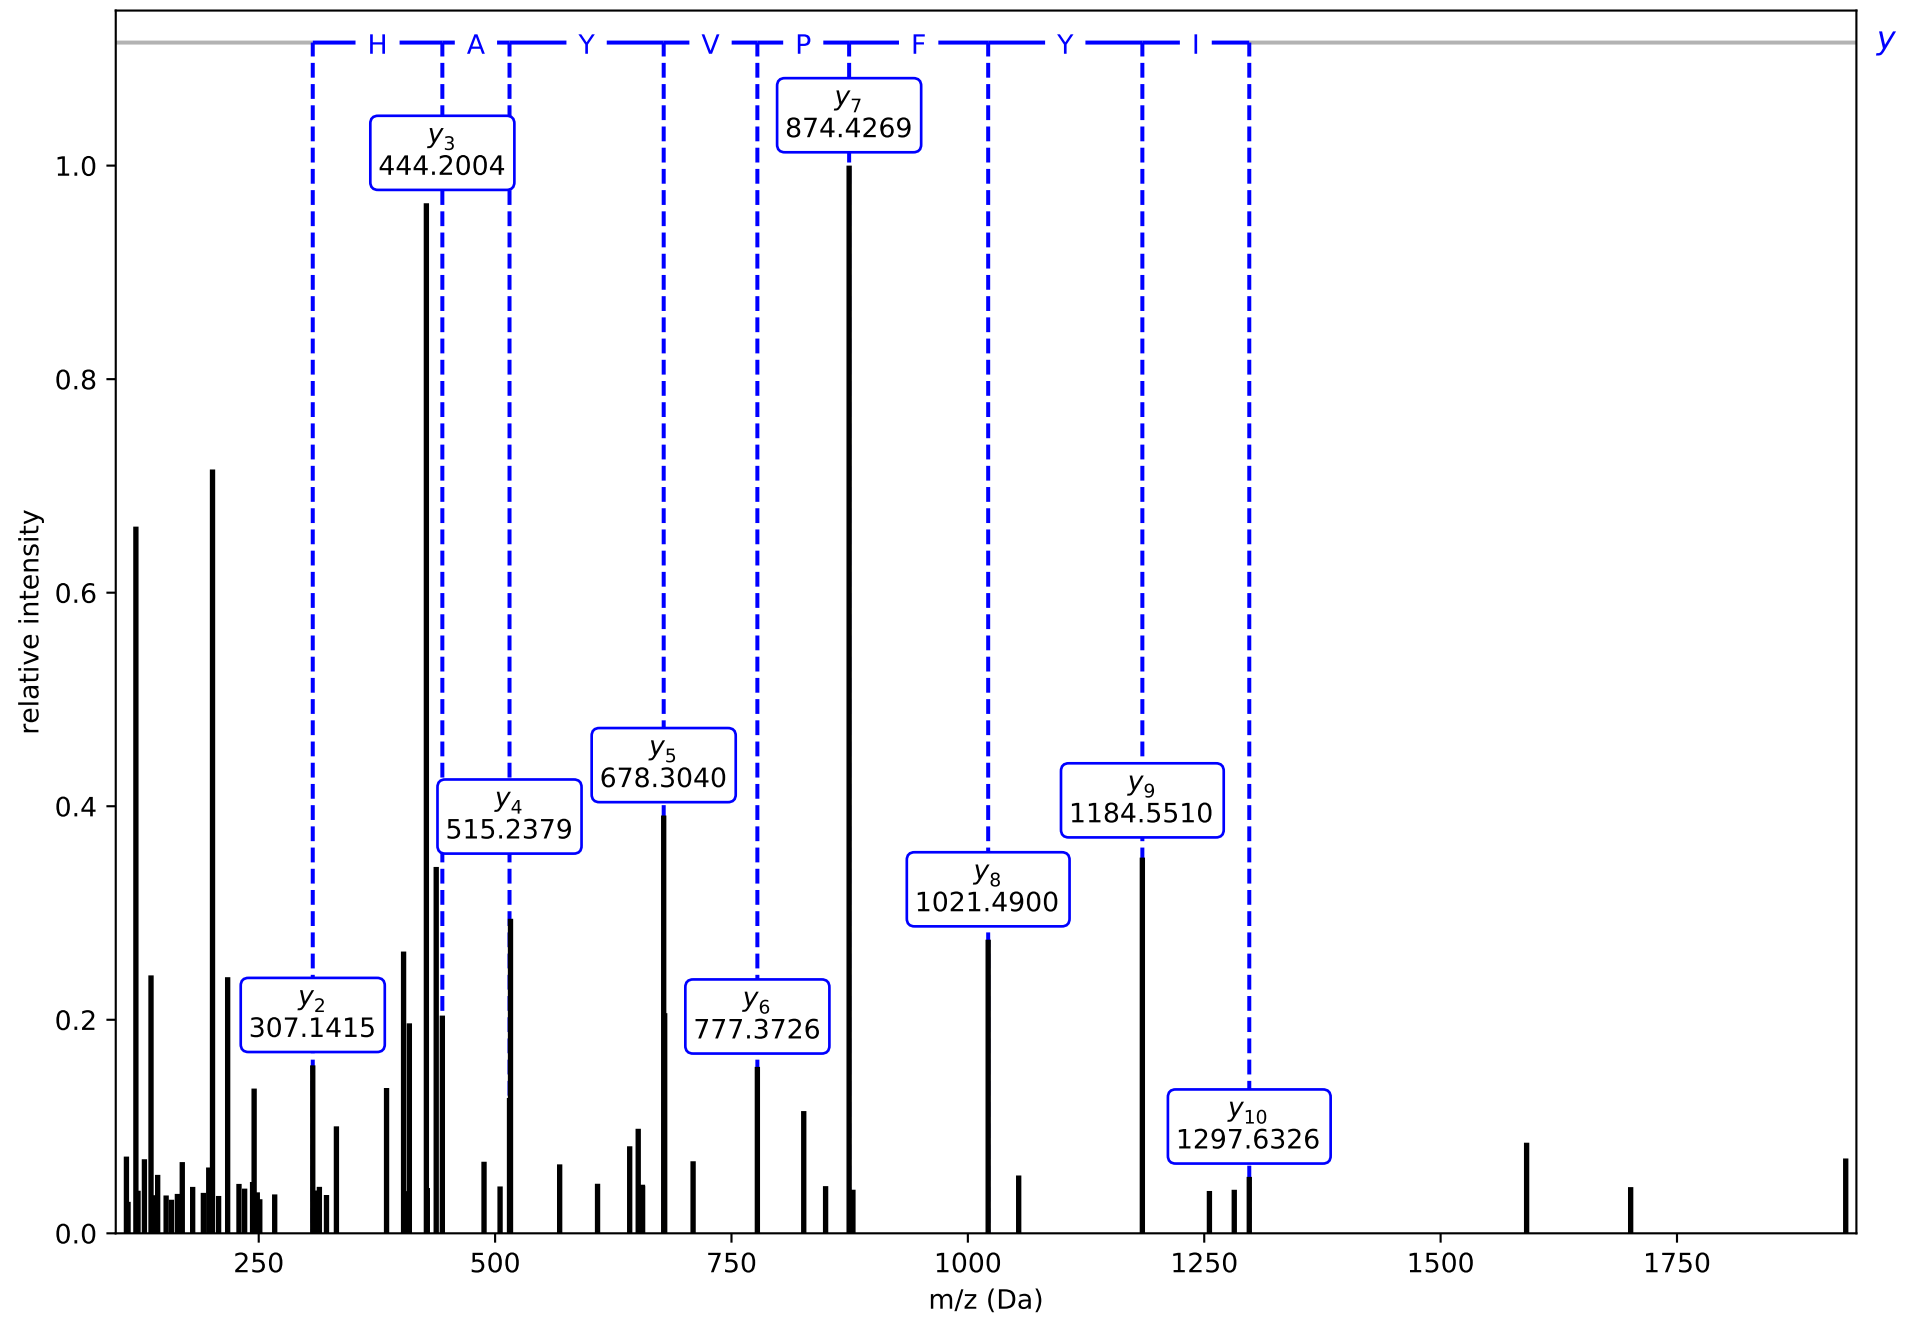

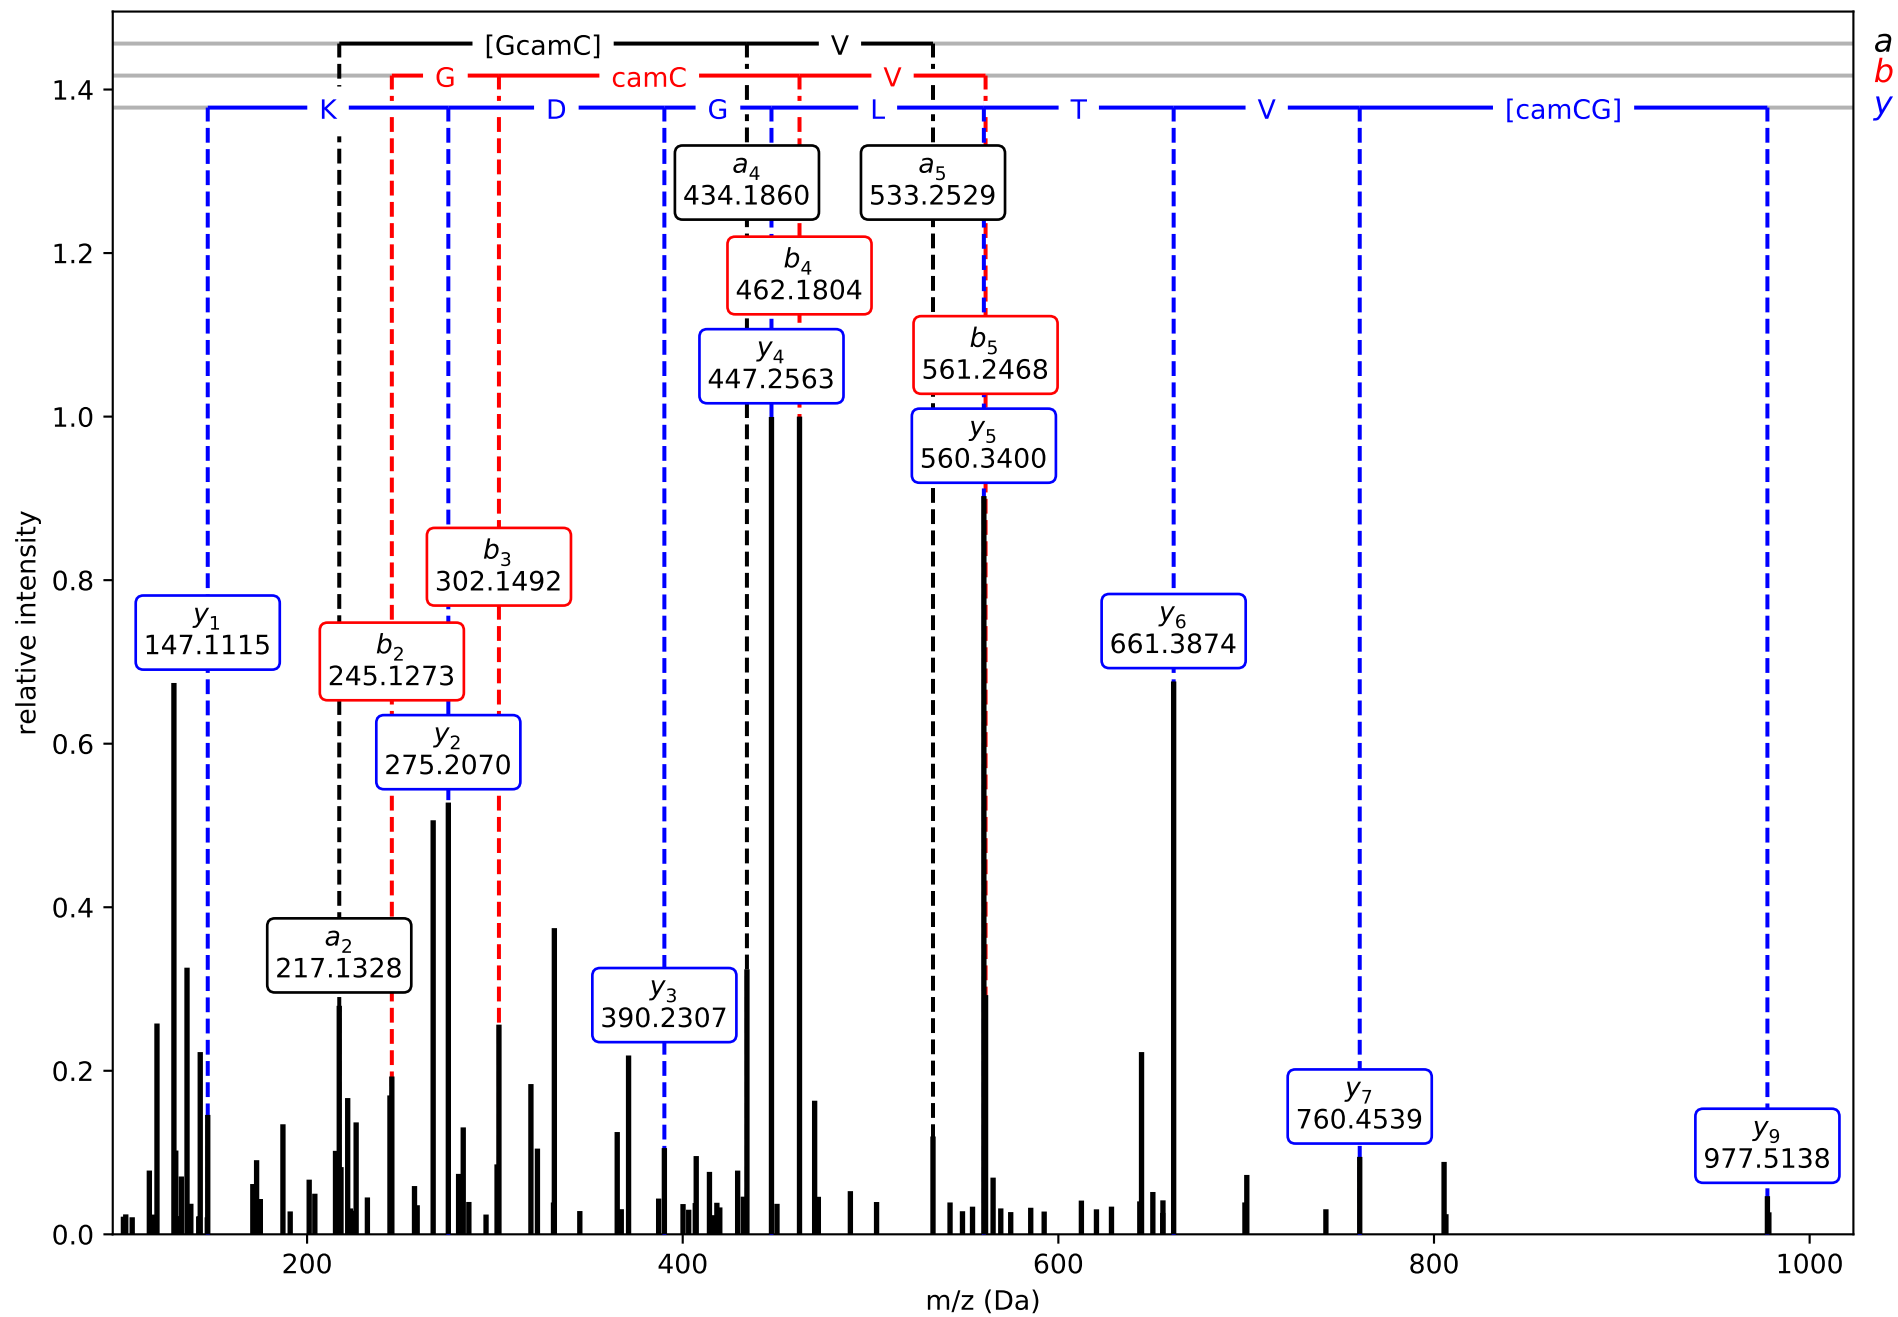

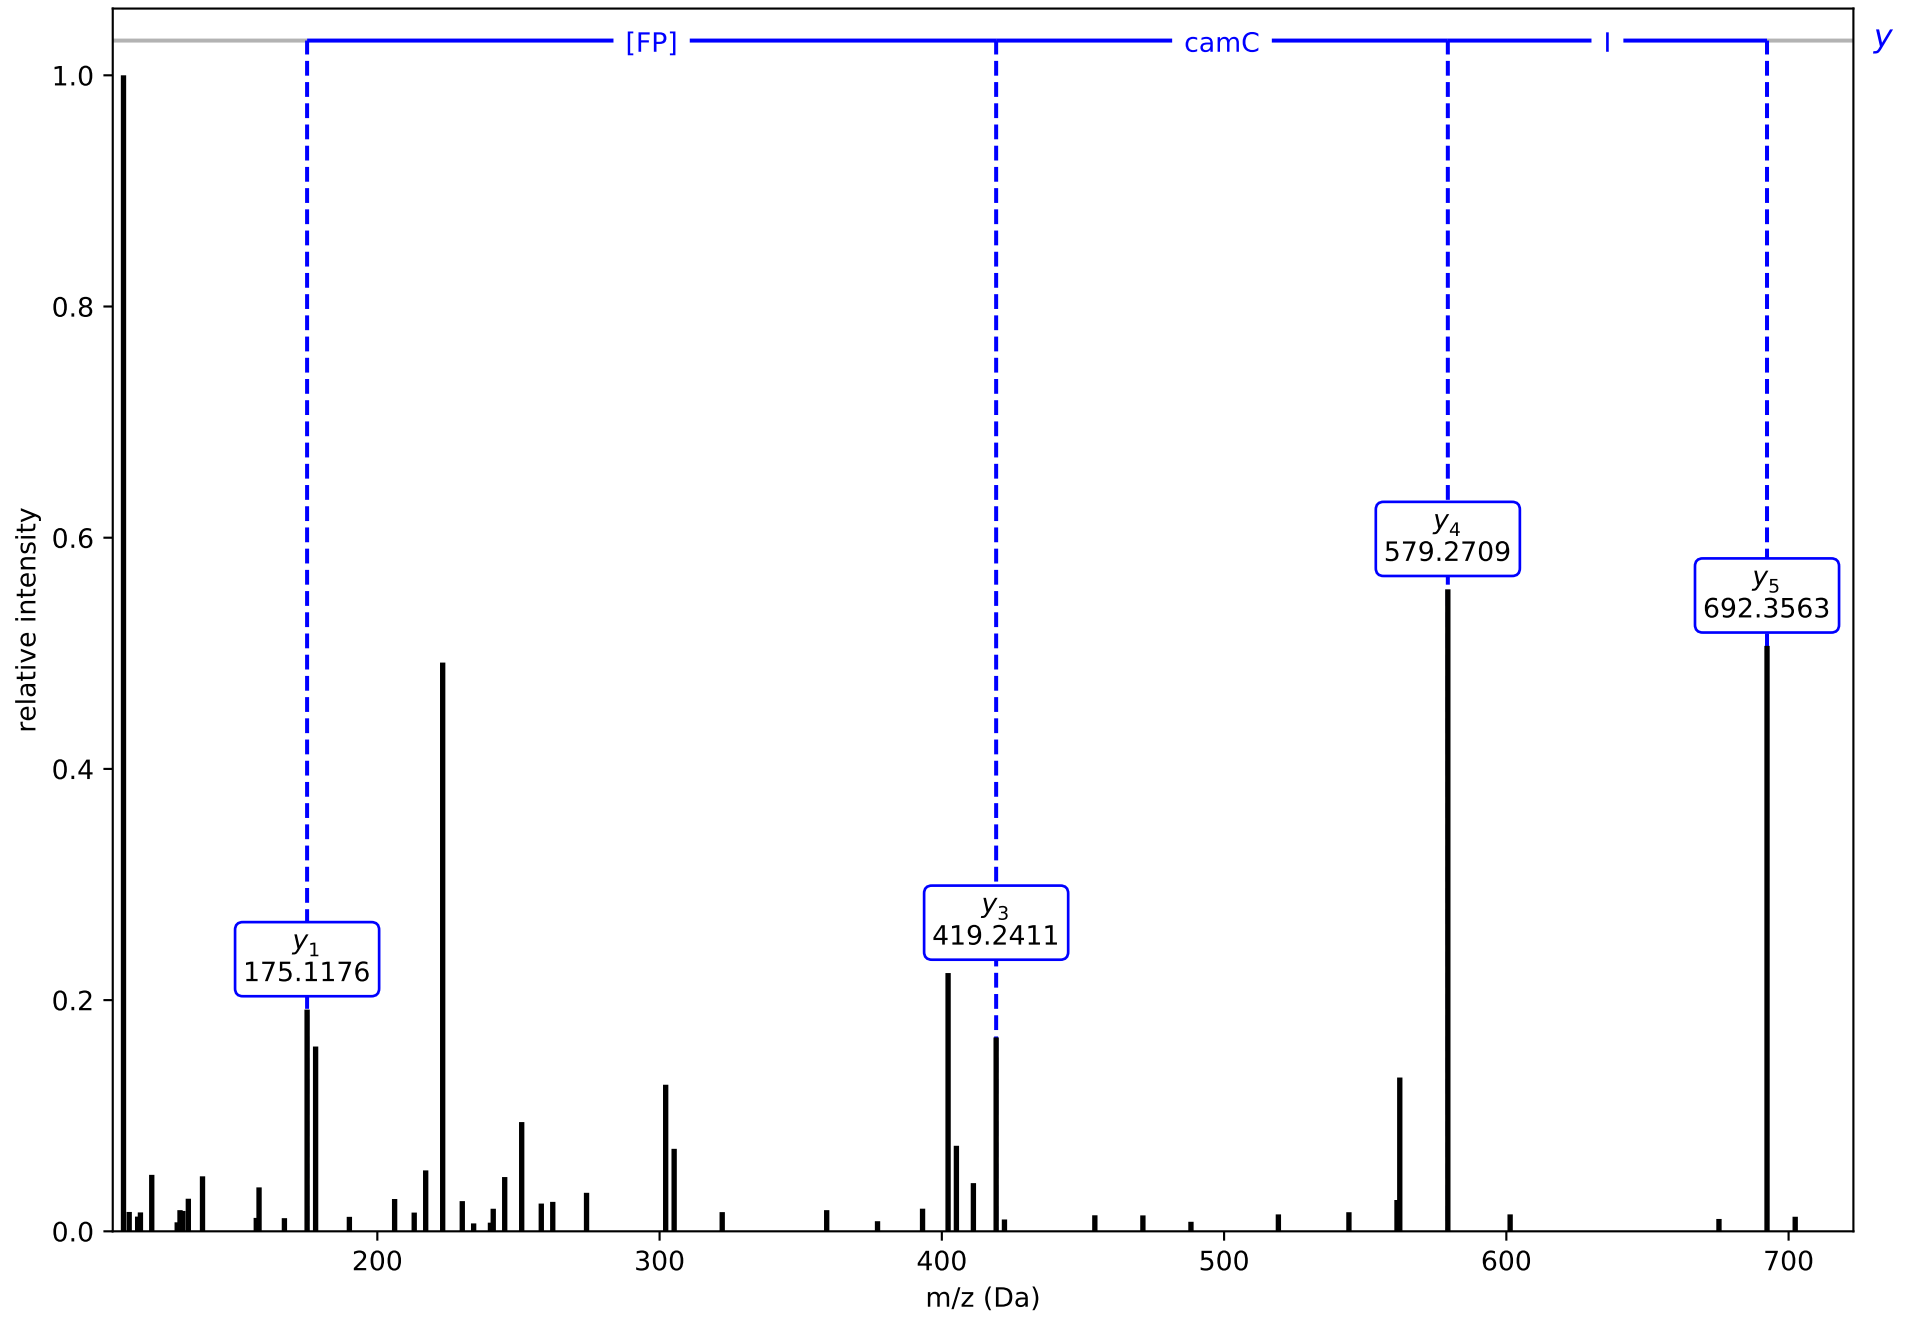

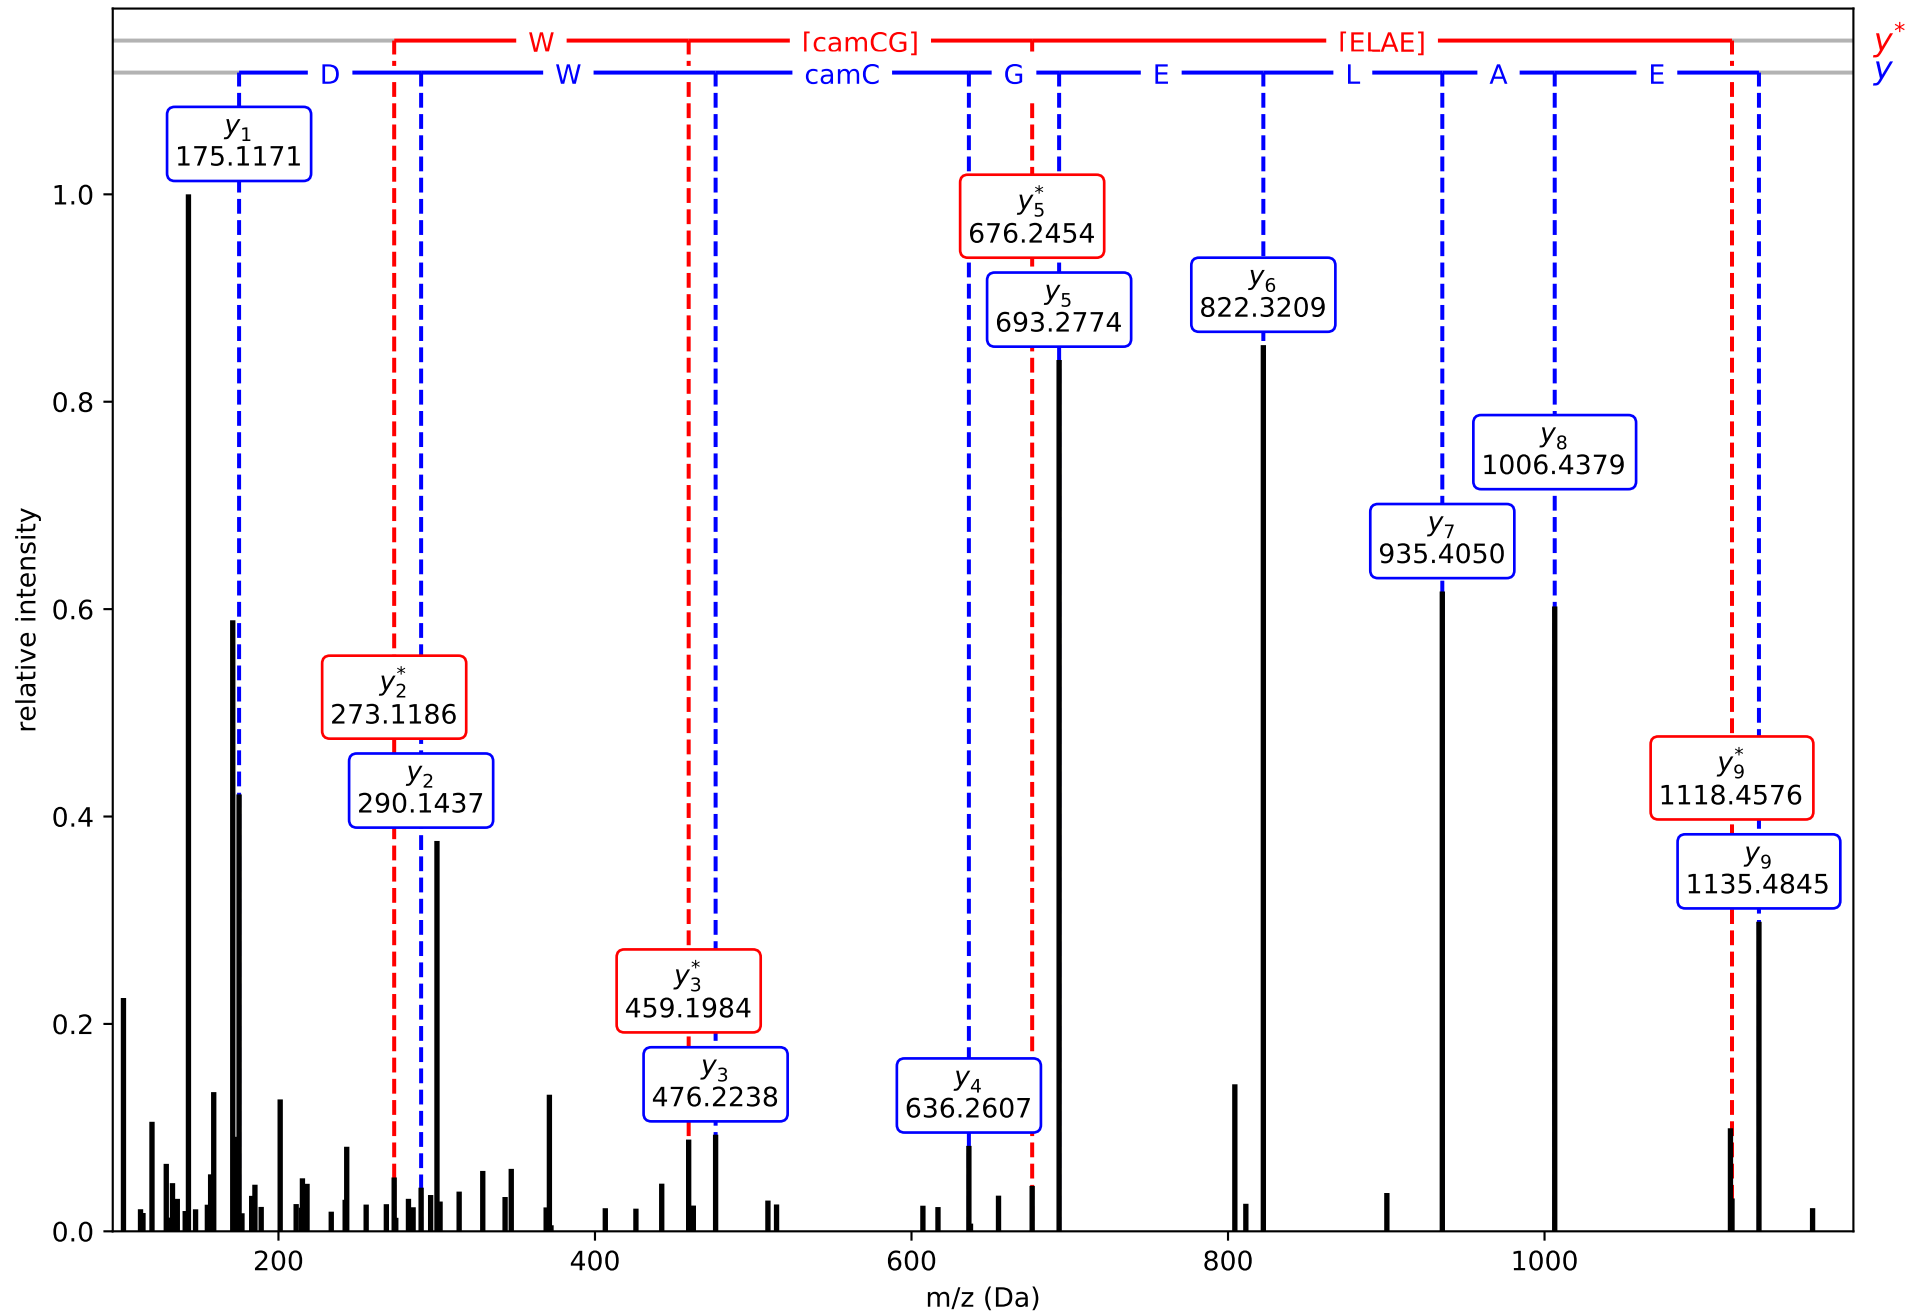

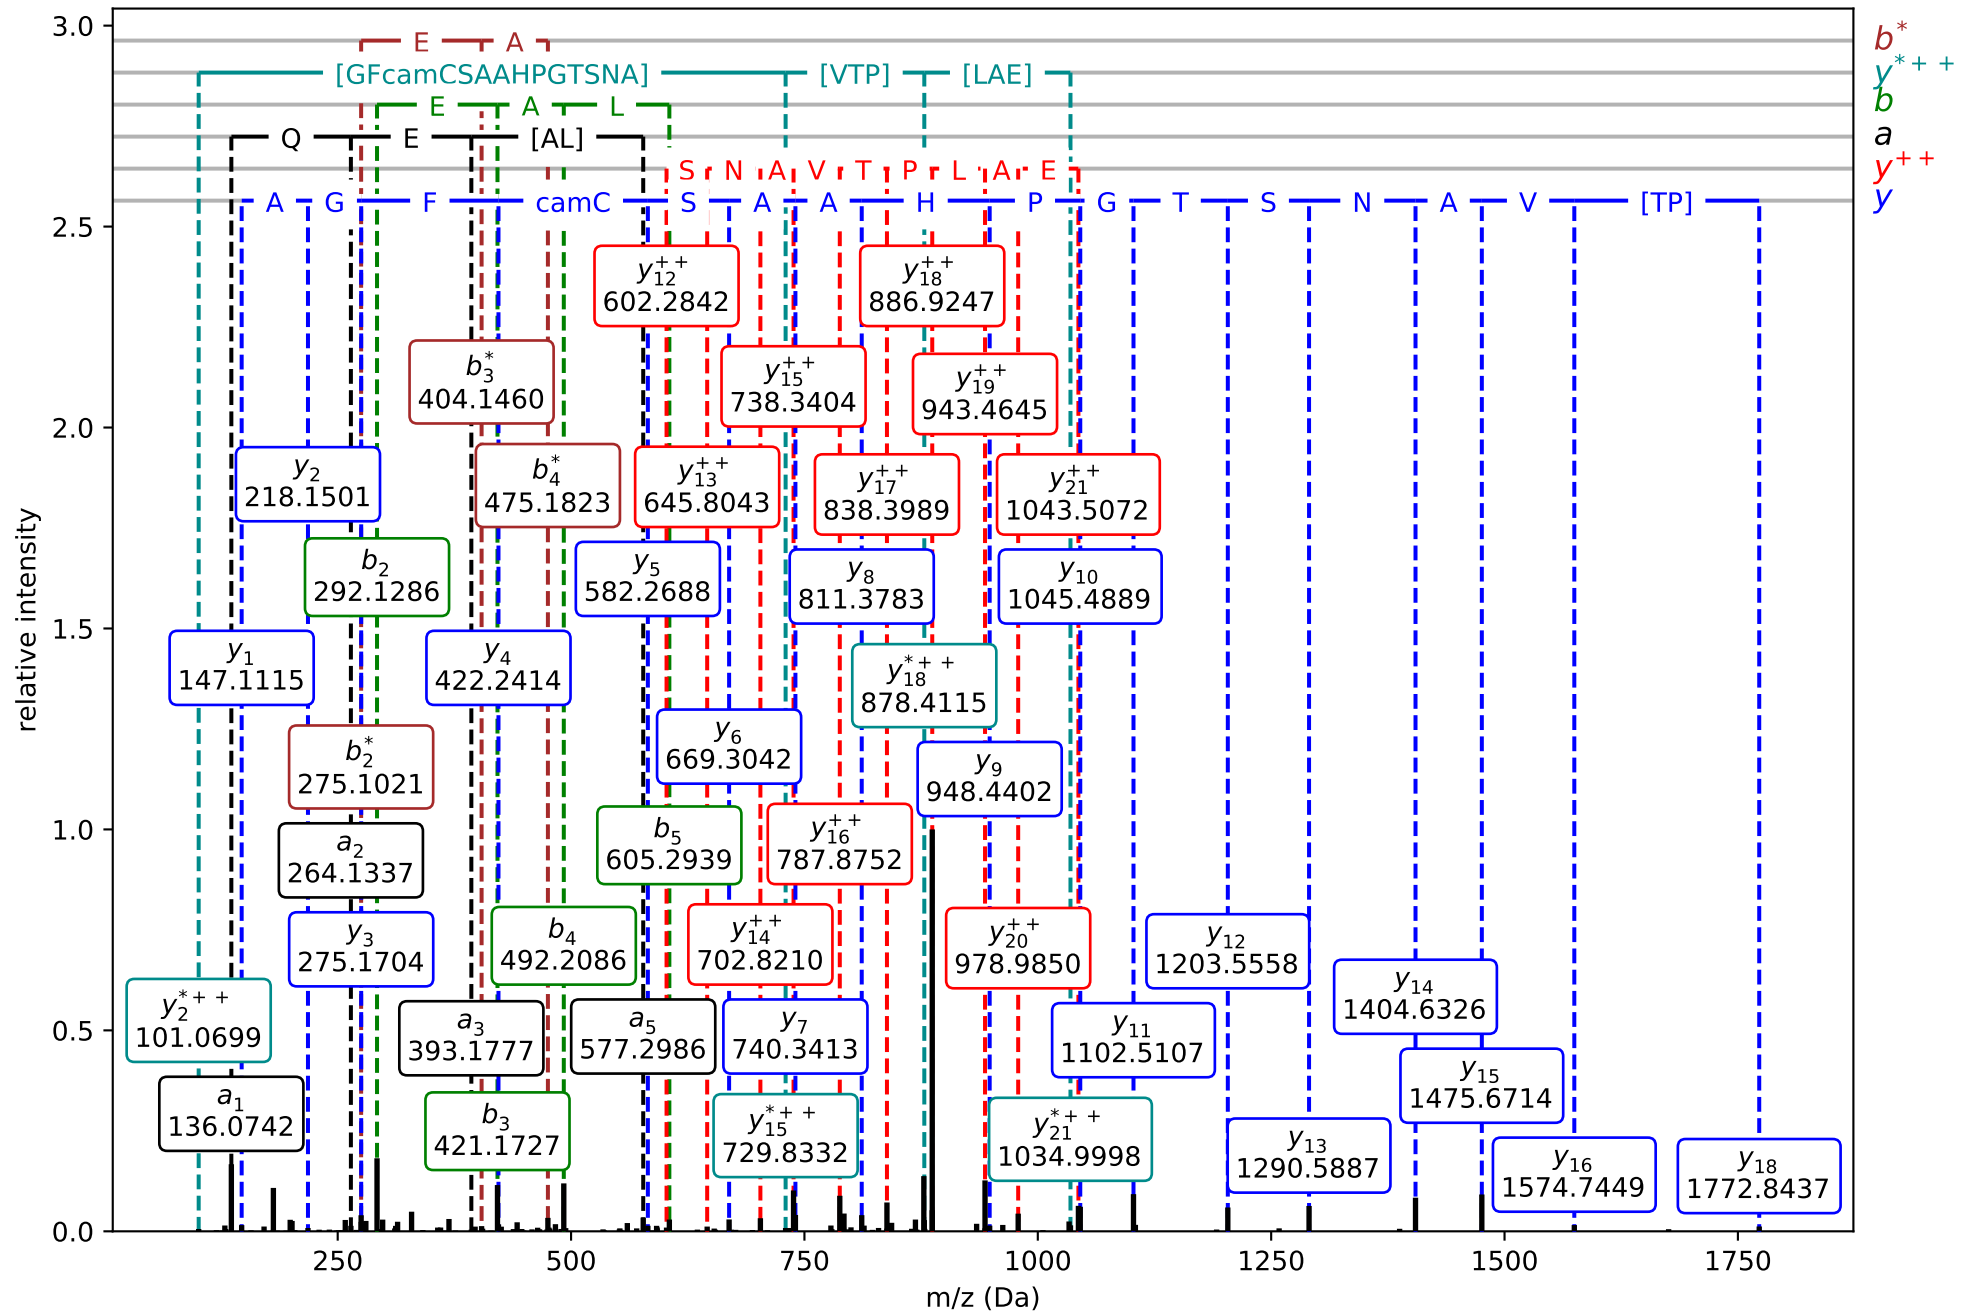



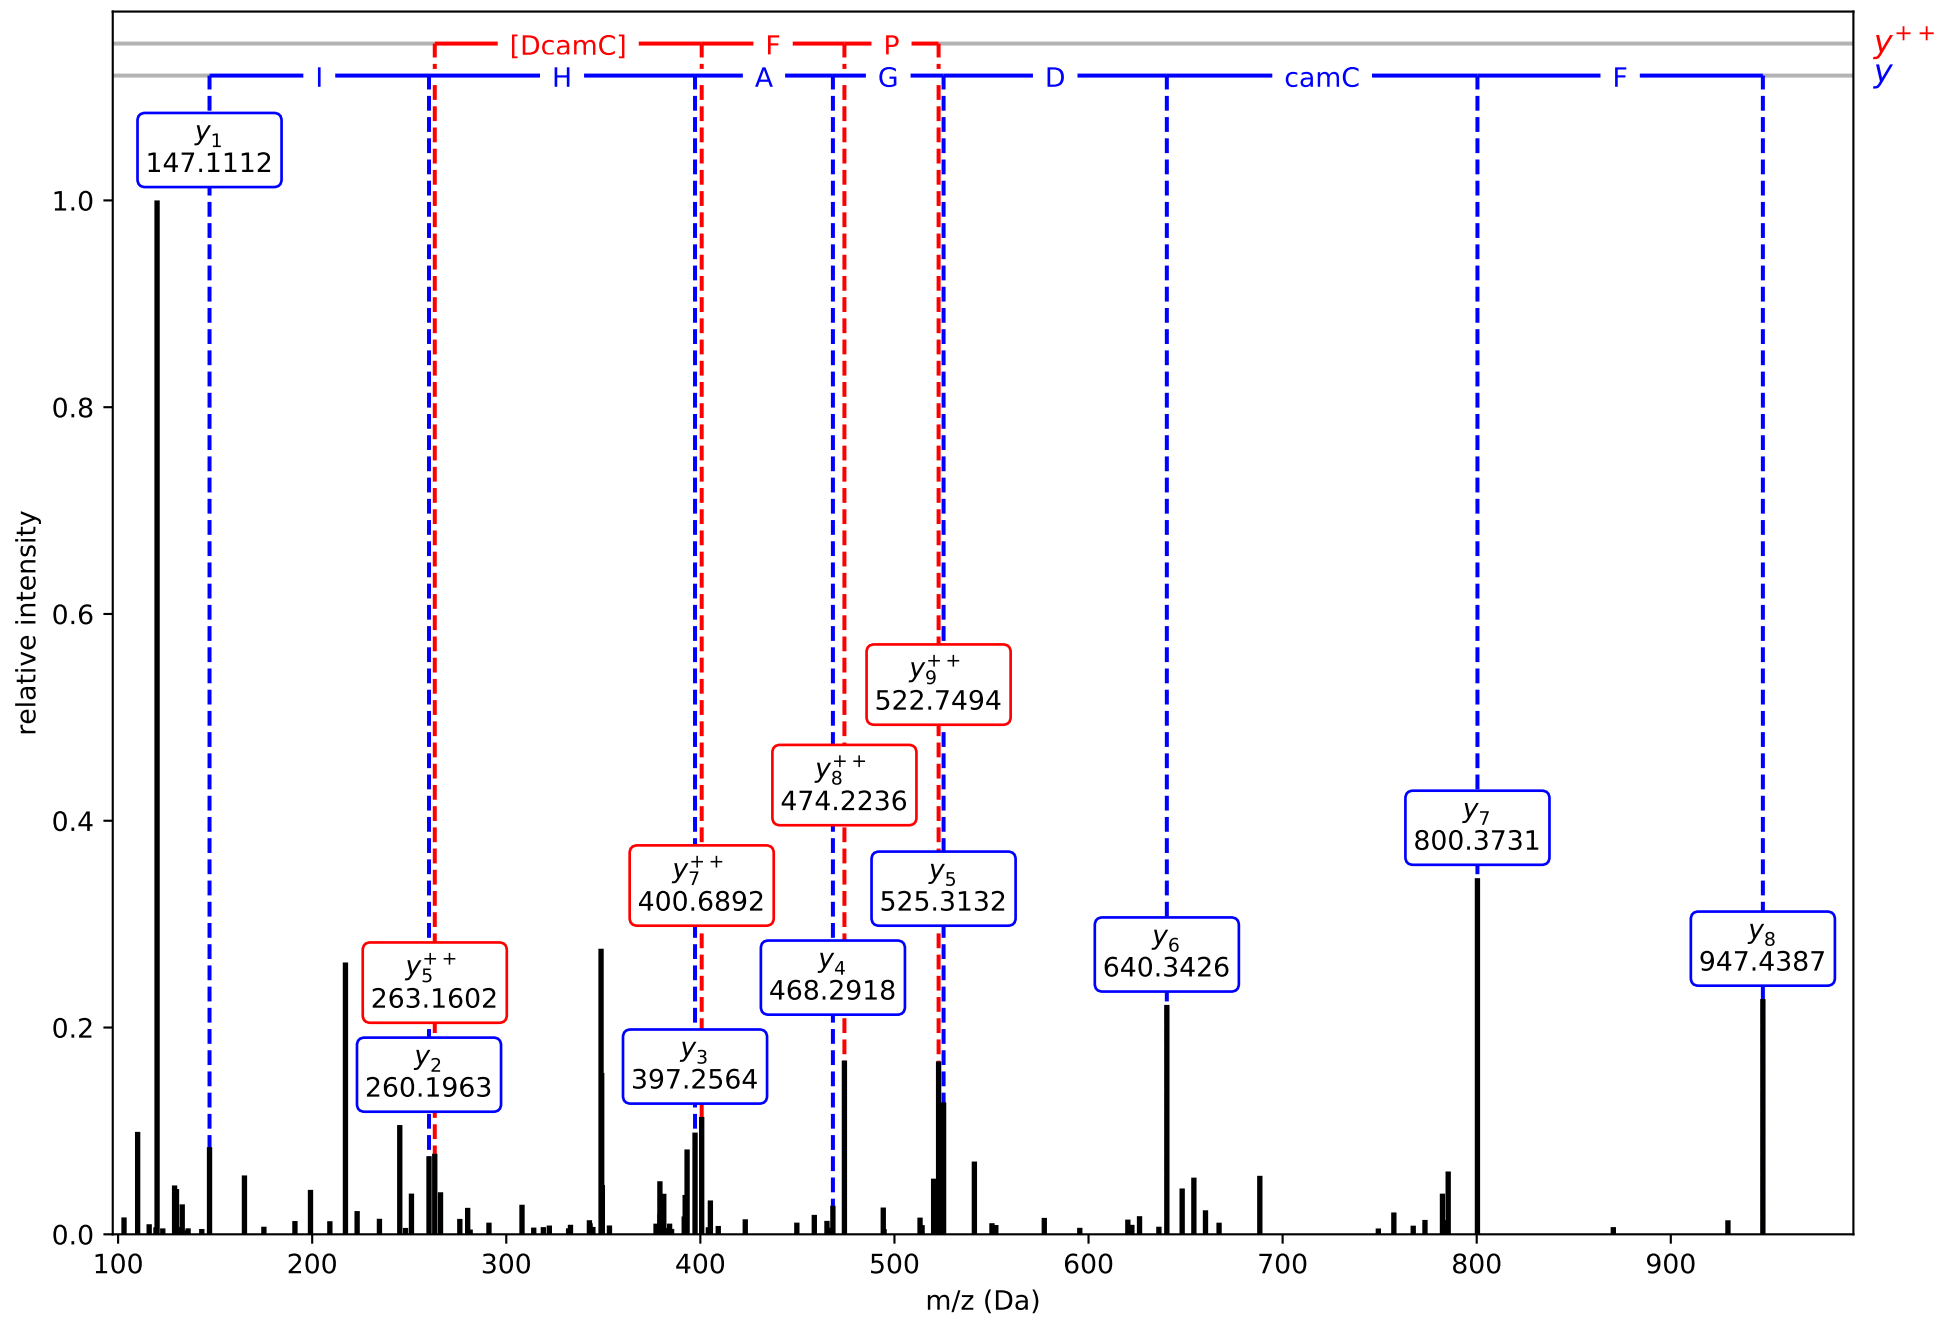

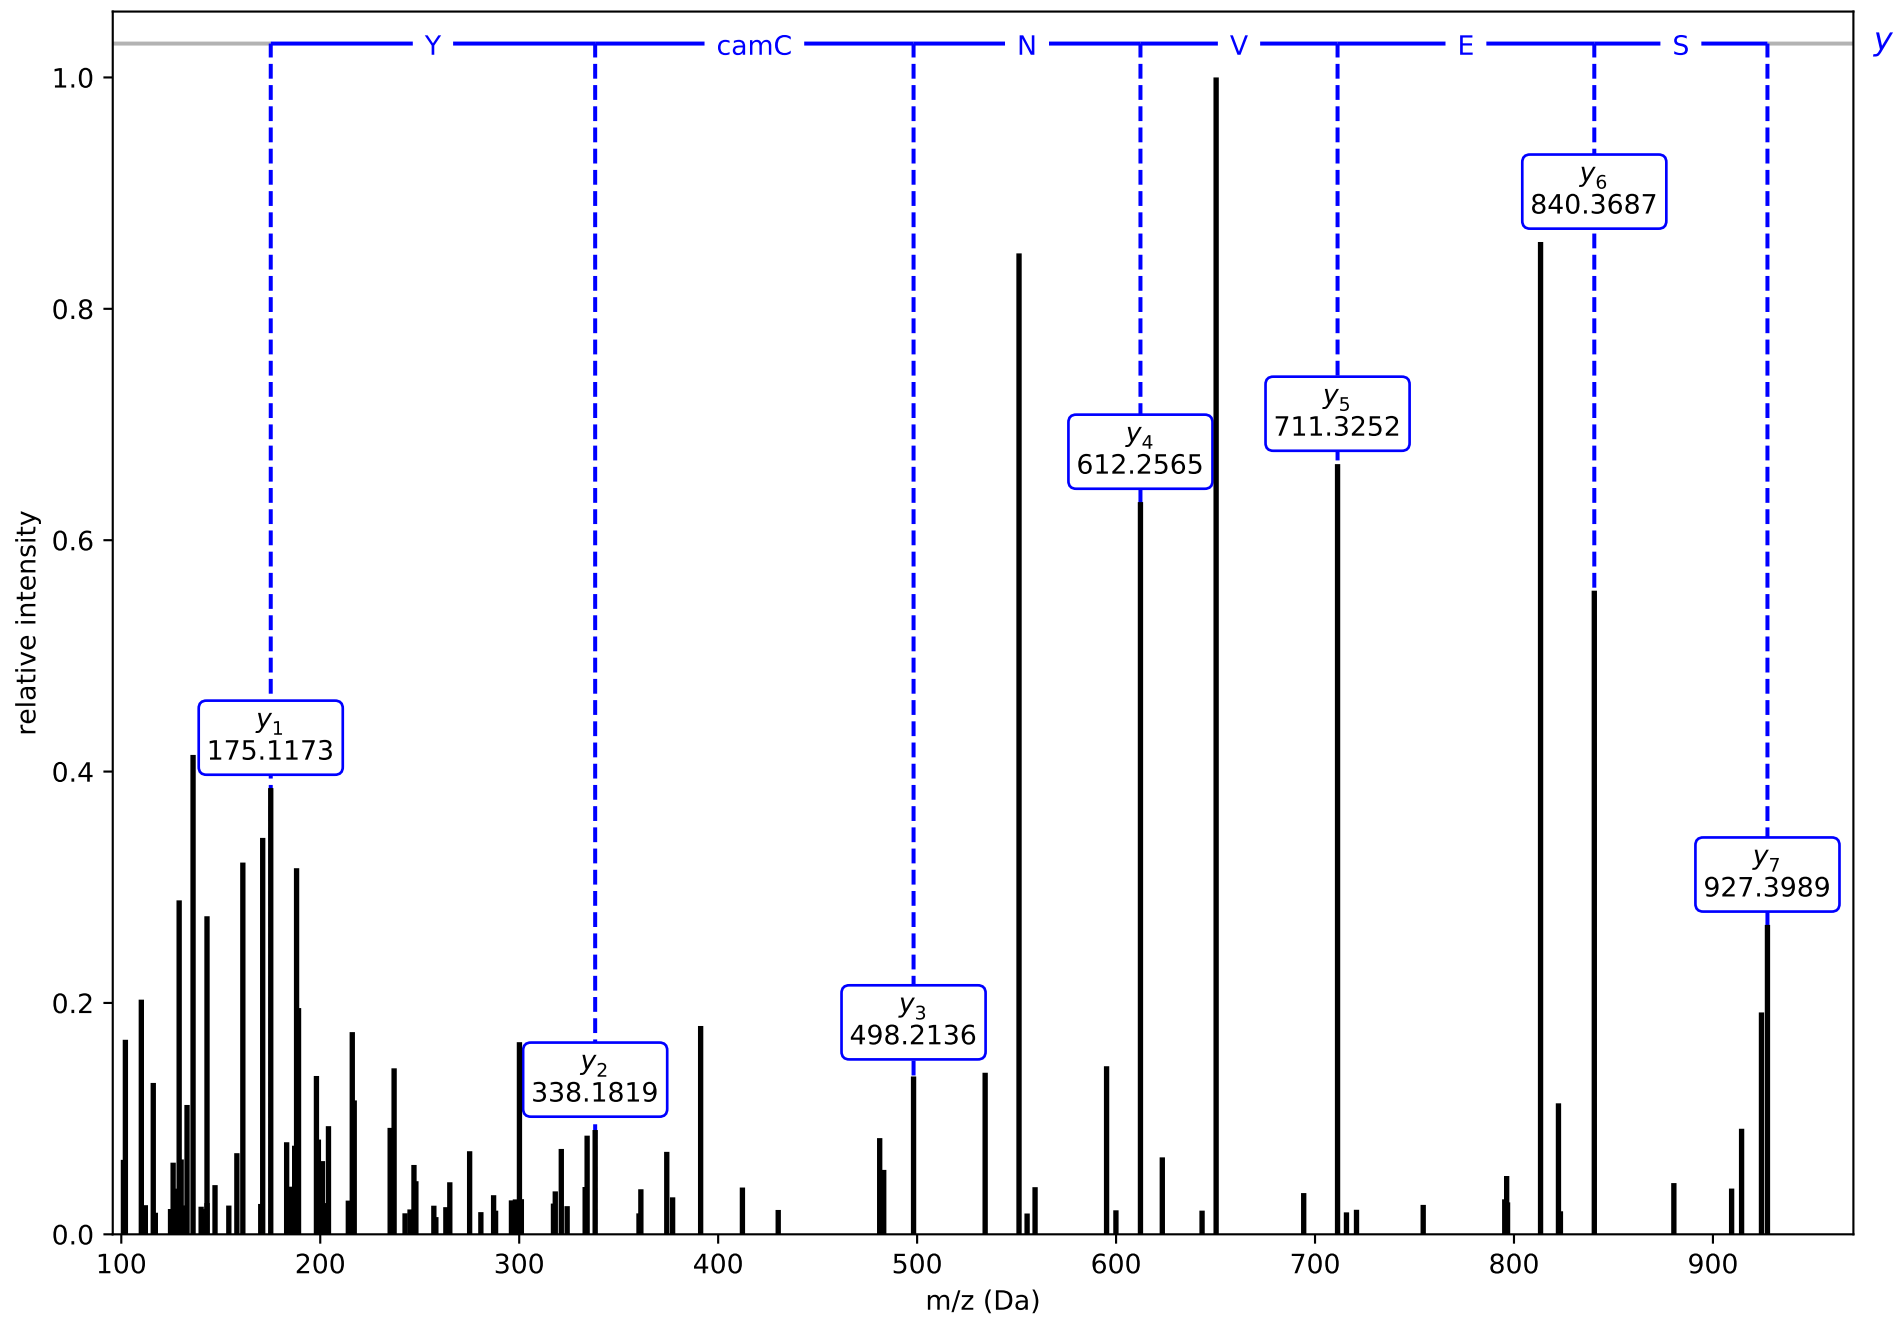

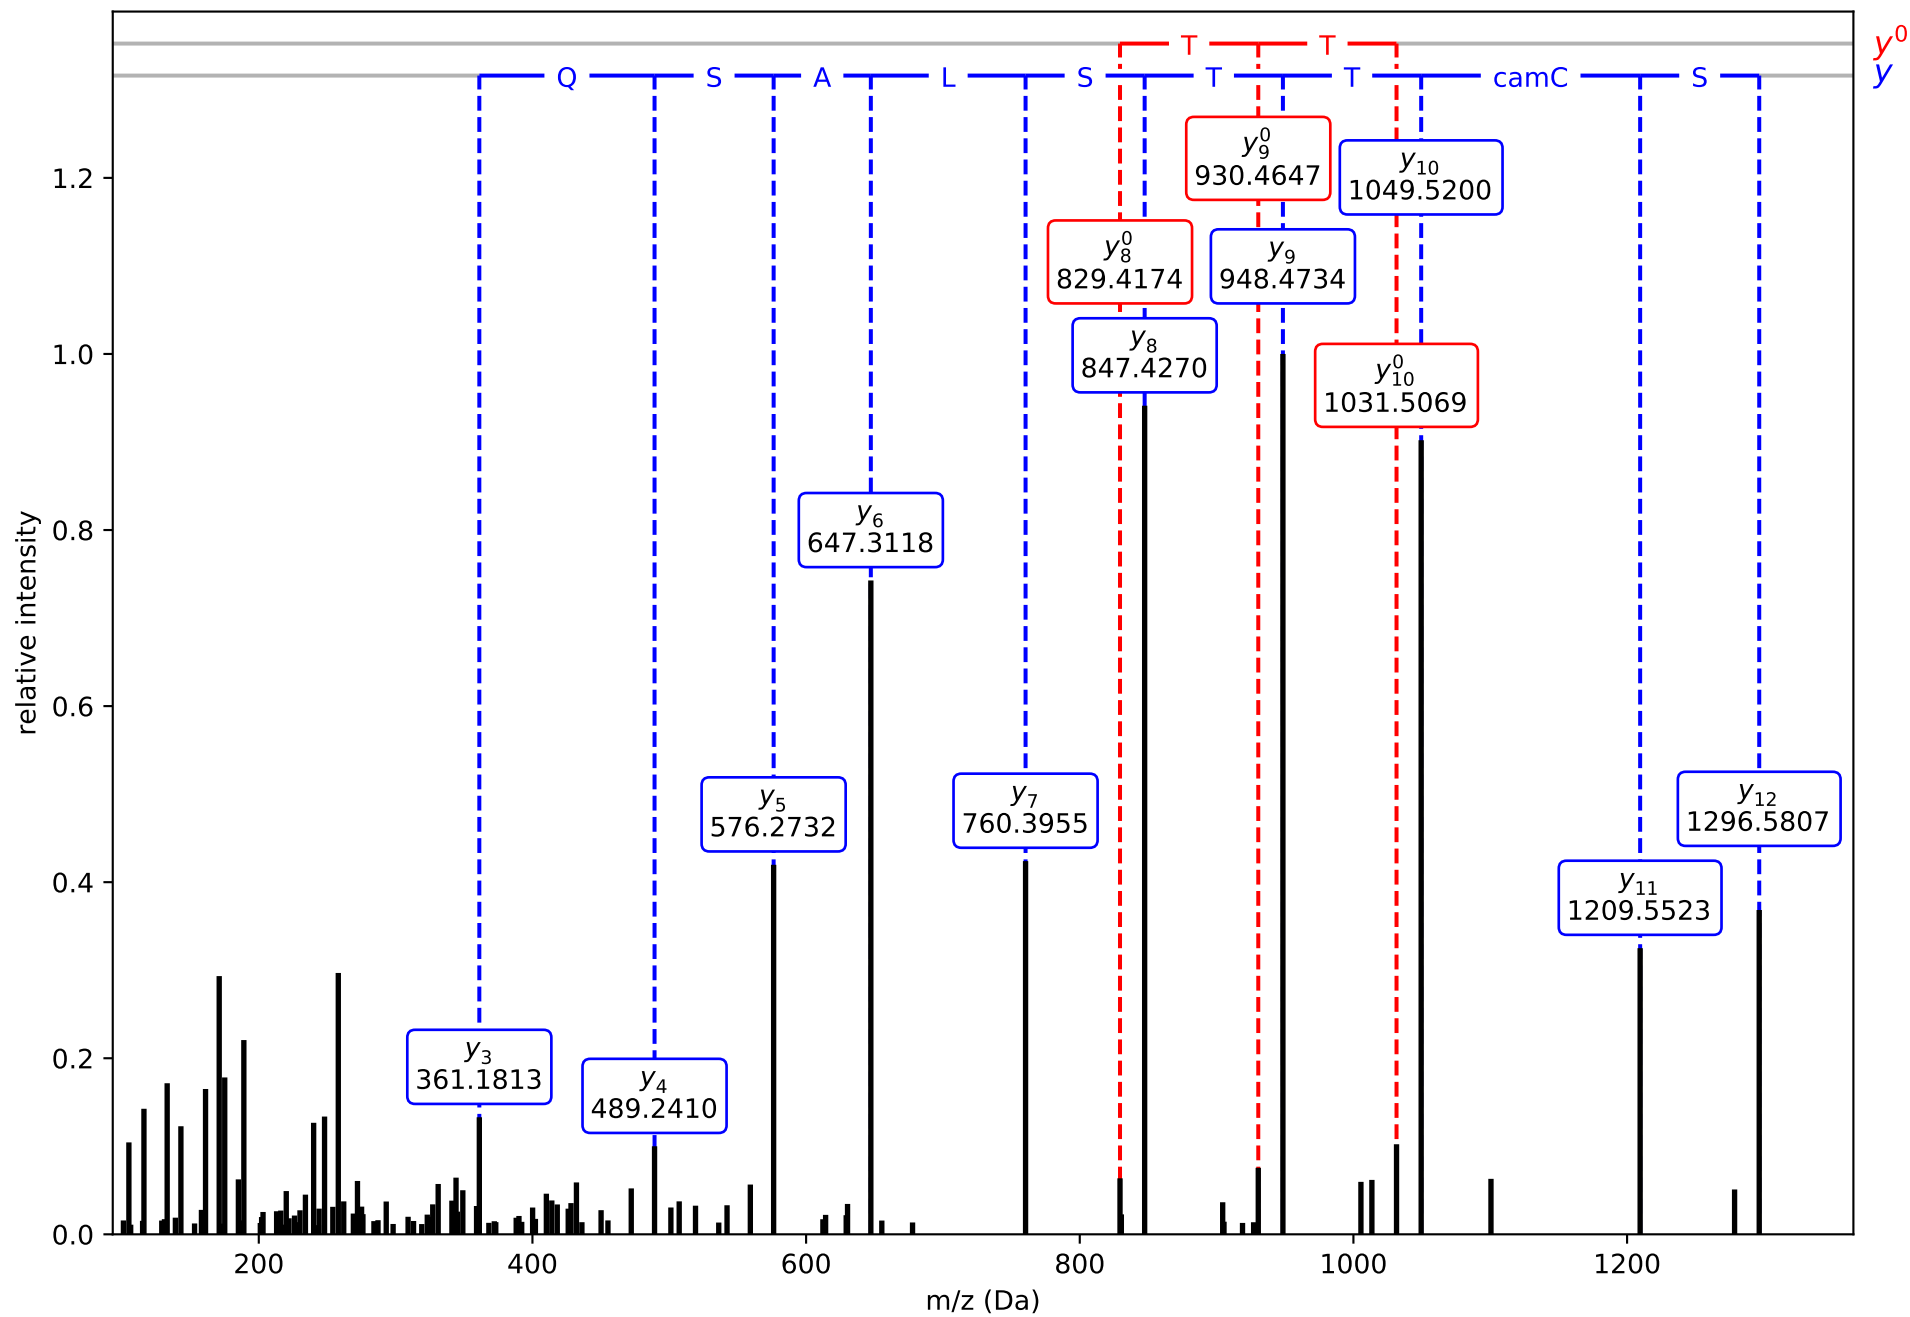

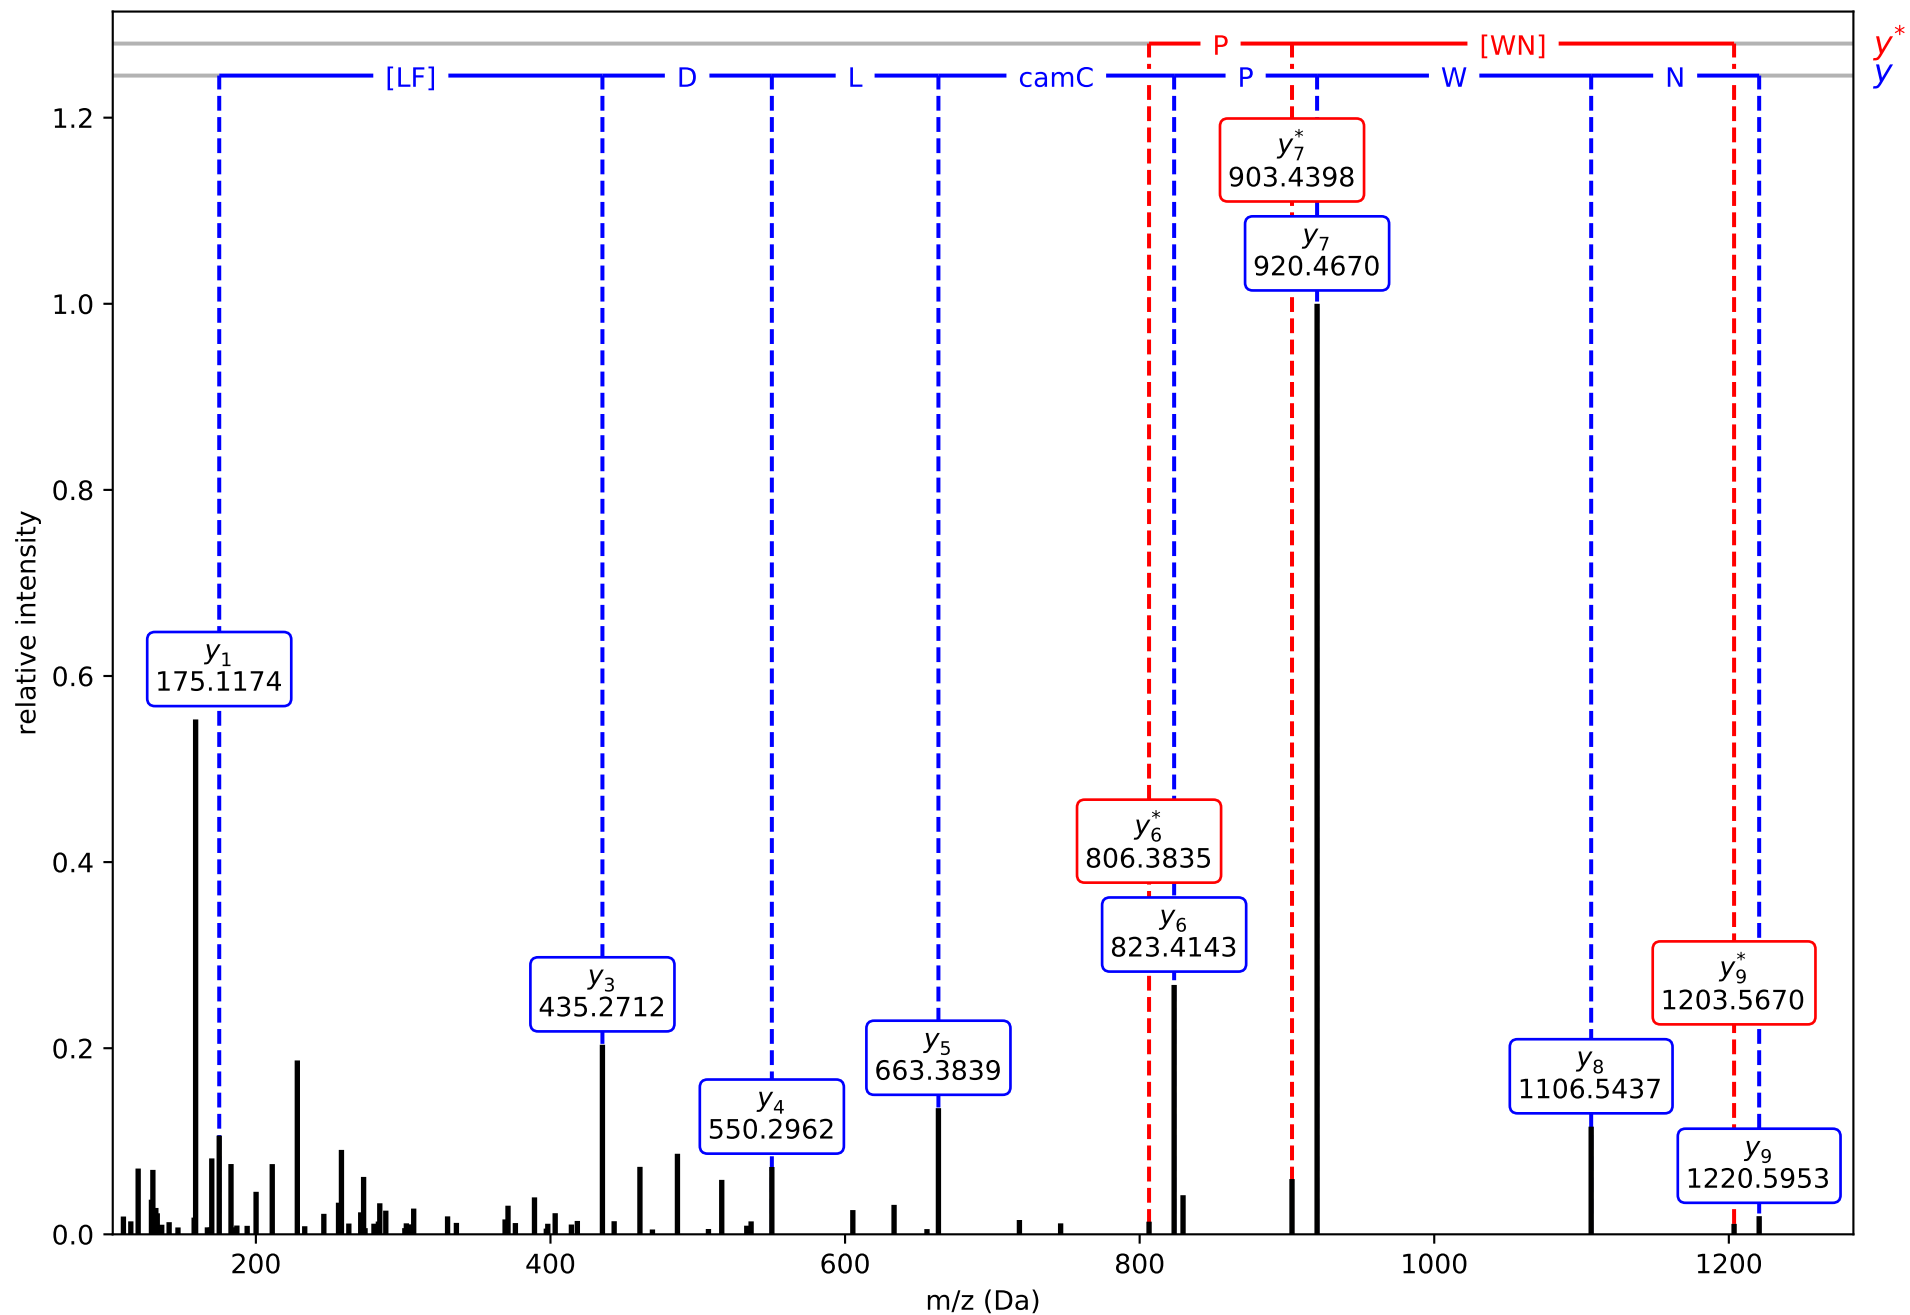

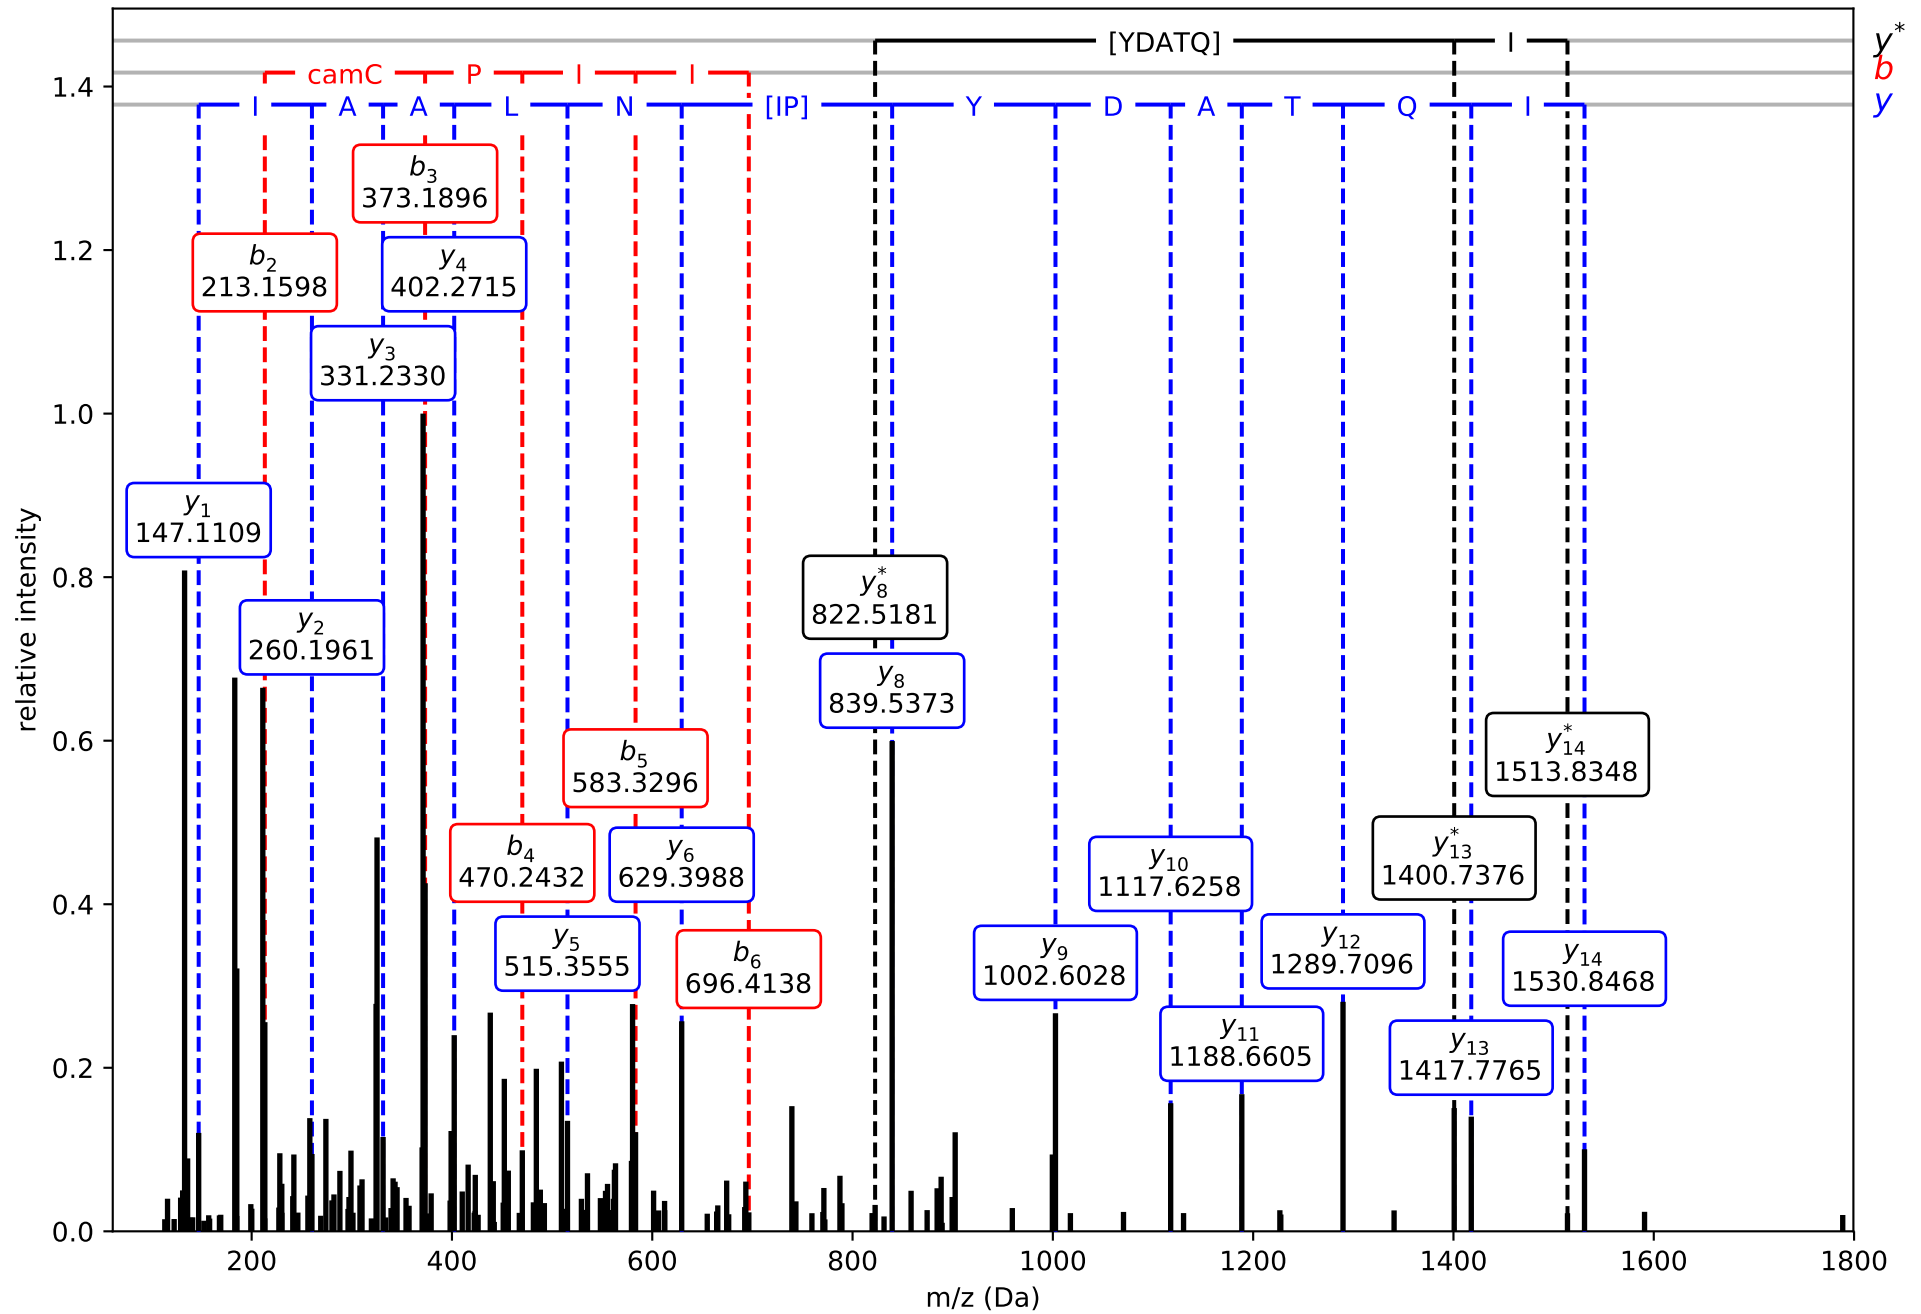

Q8BRT1 : SLLVAGAAQYDcamCFFQHLR

parent: 699.3535, 3+

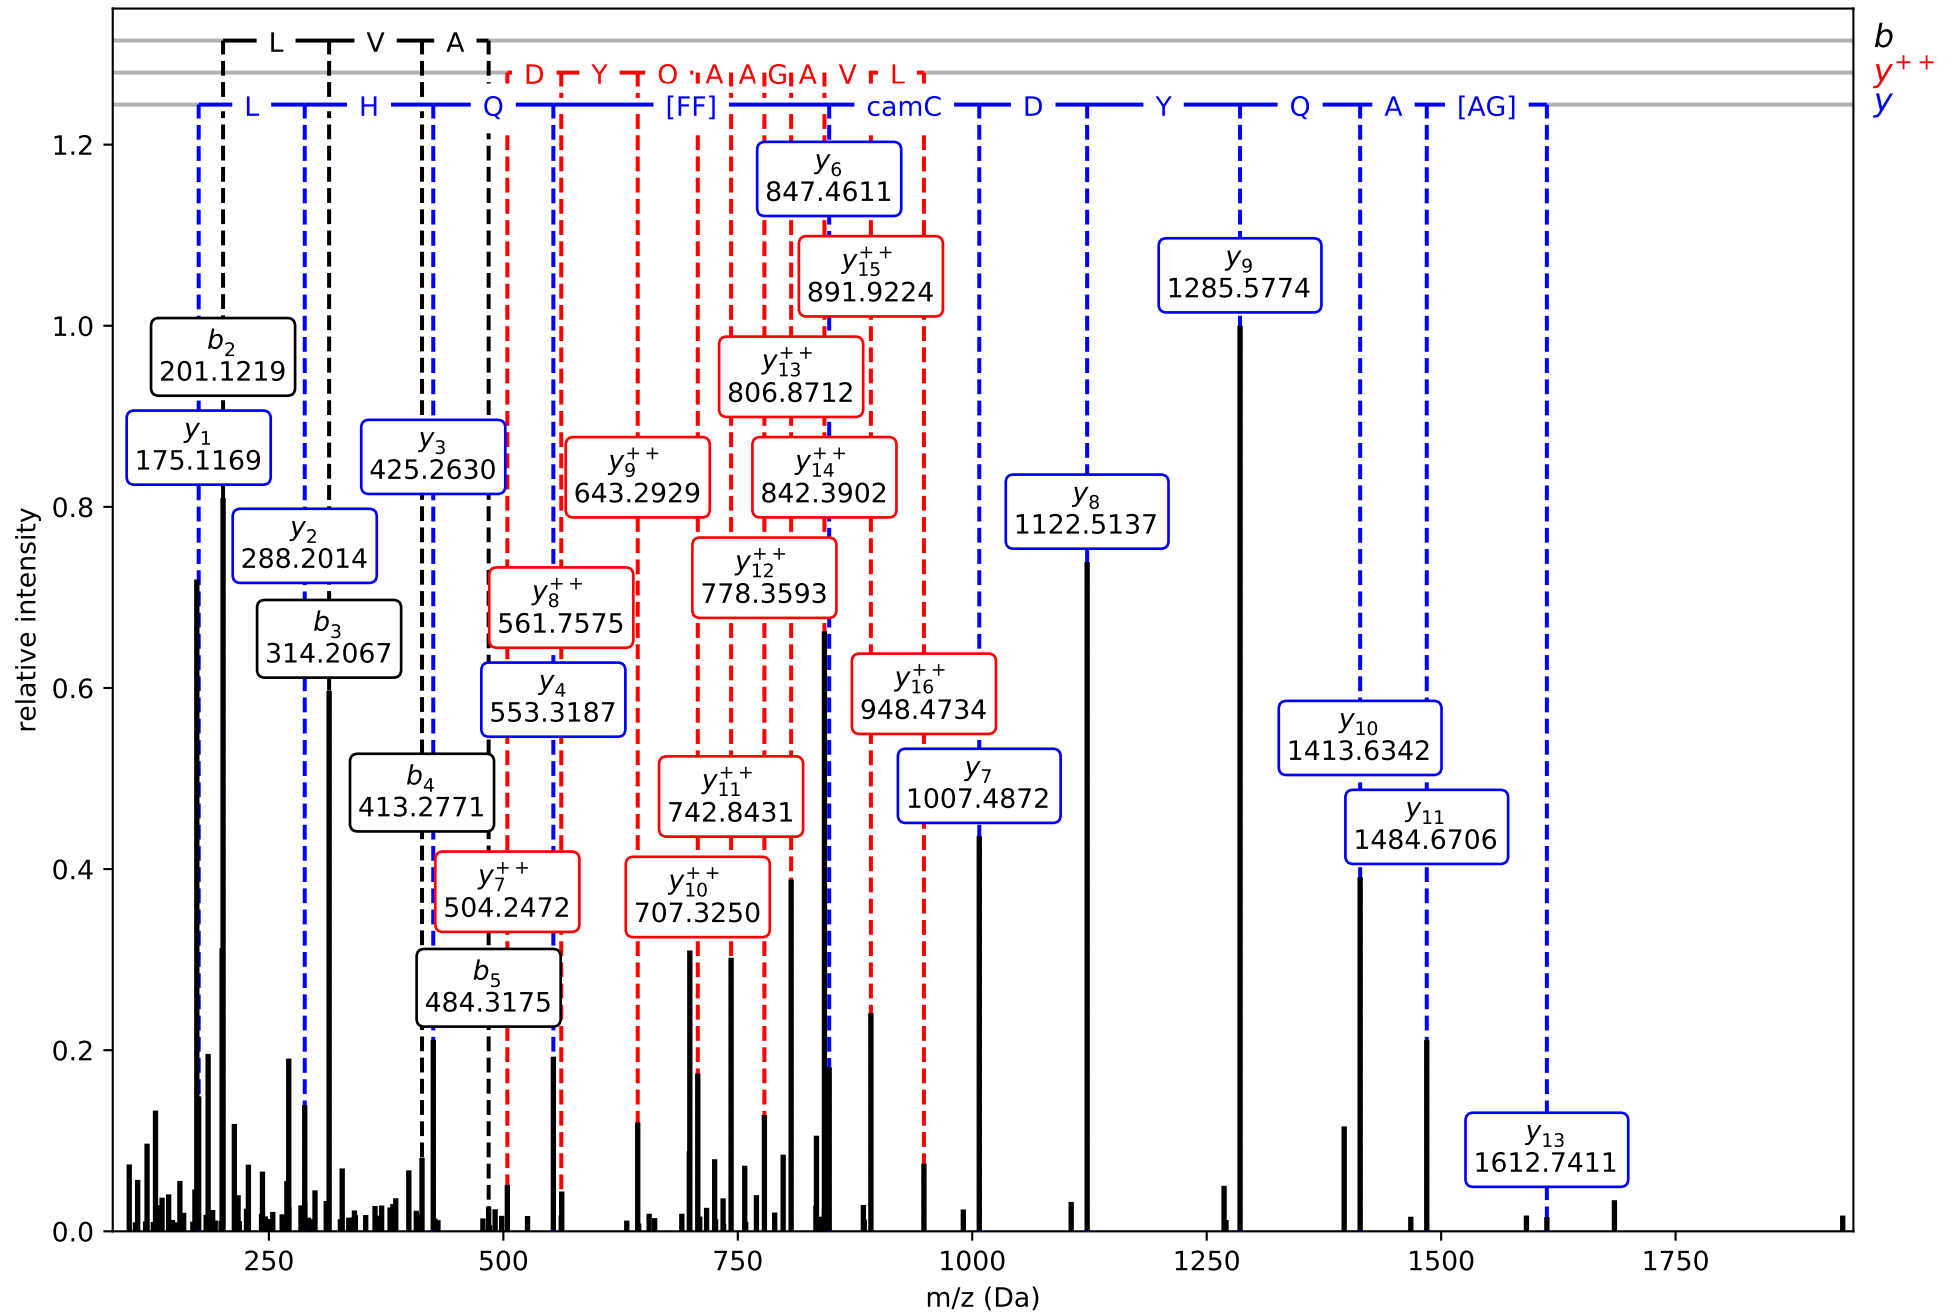

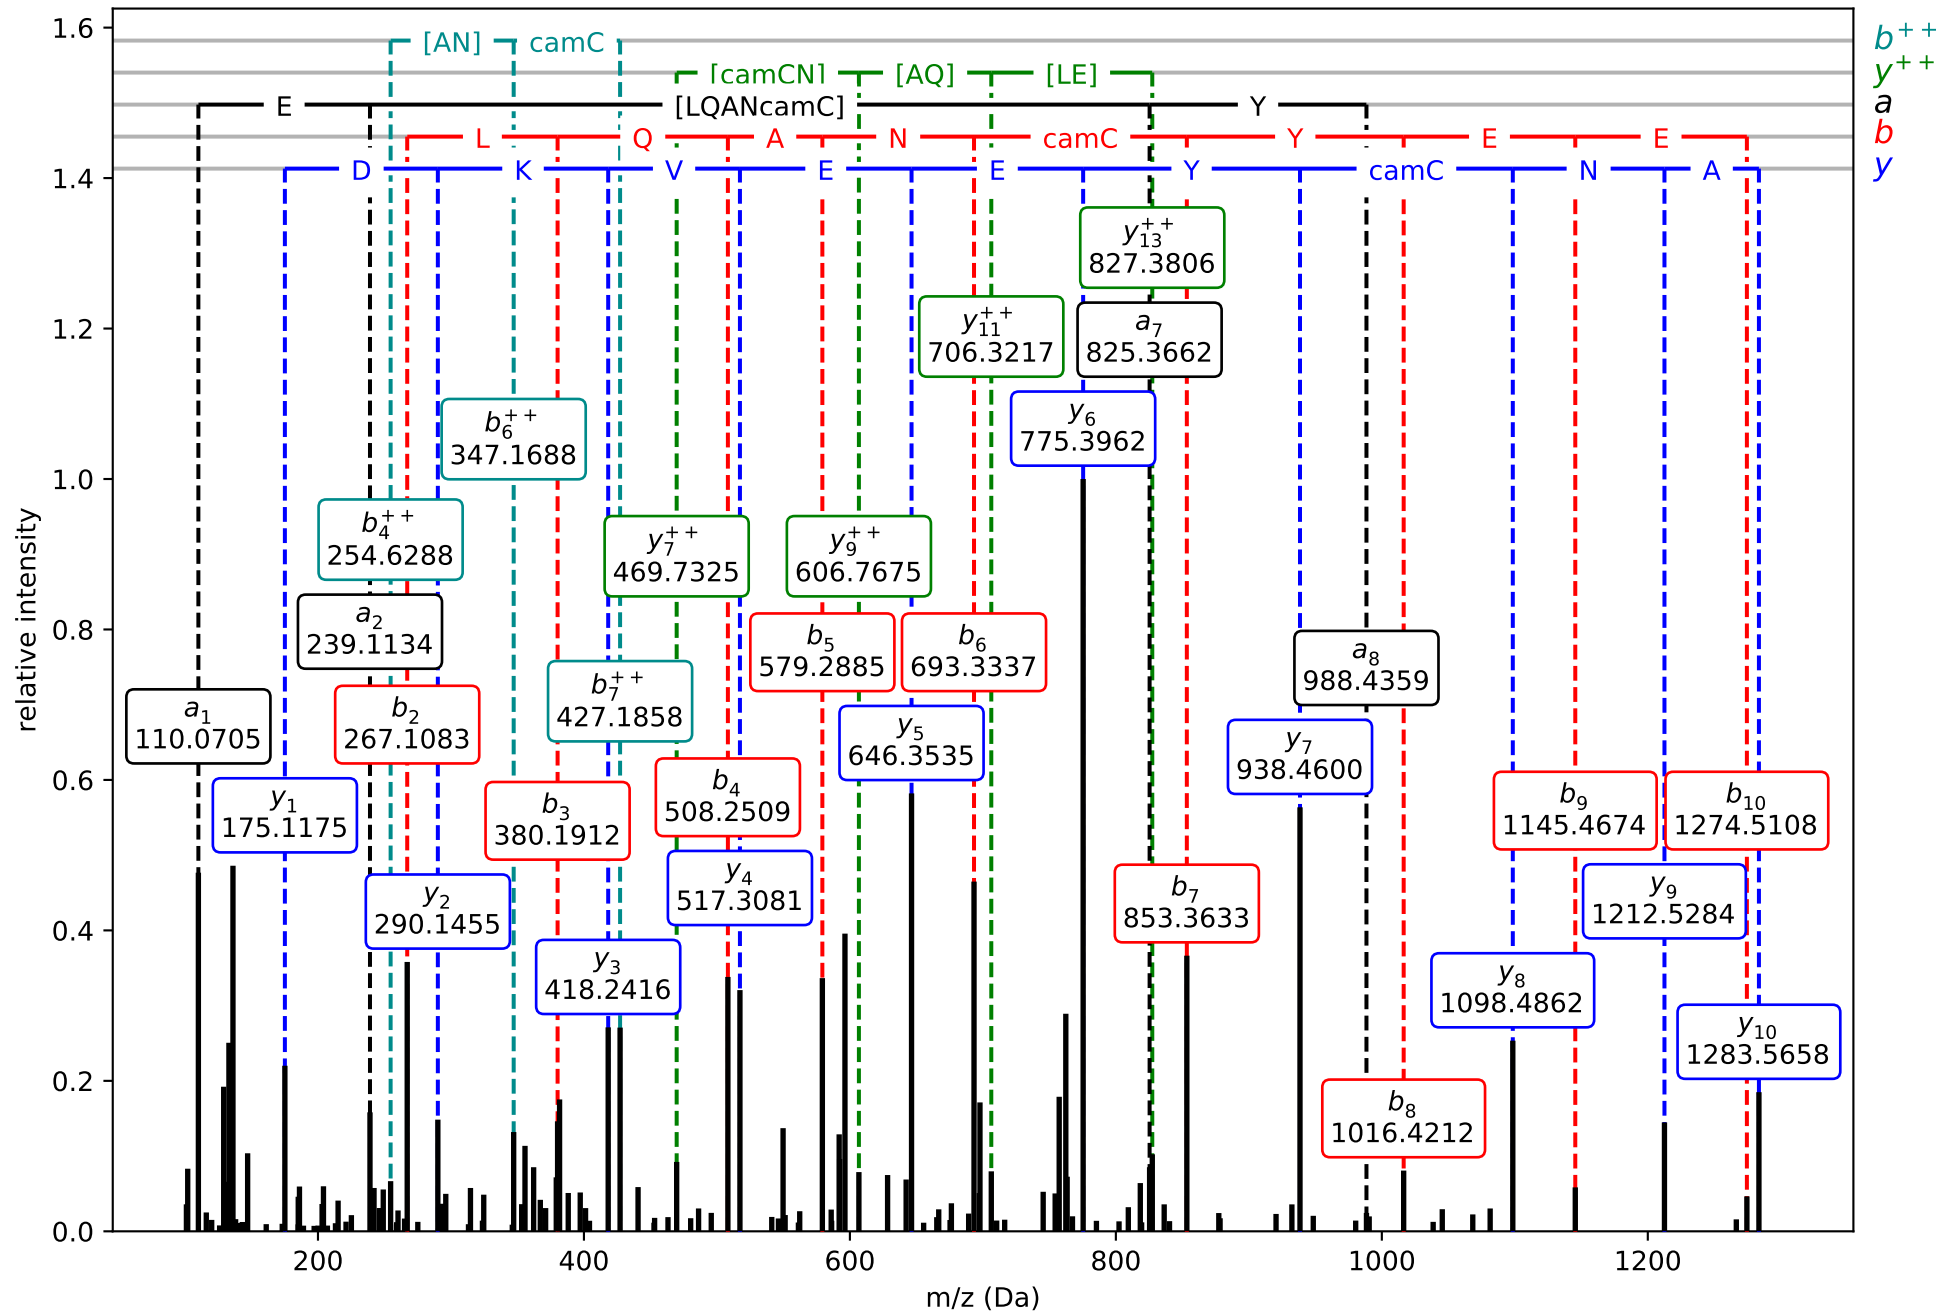

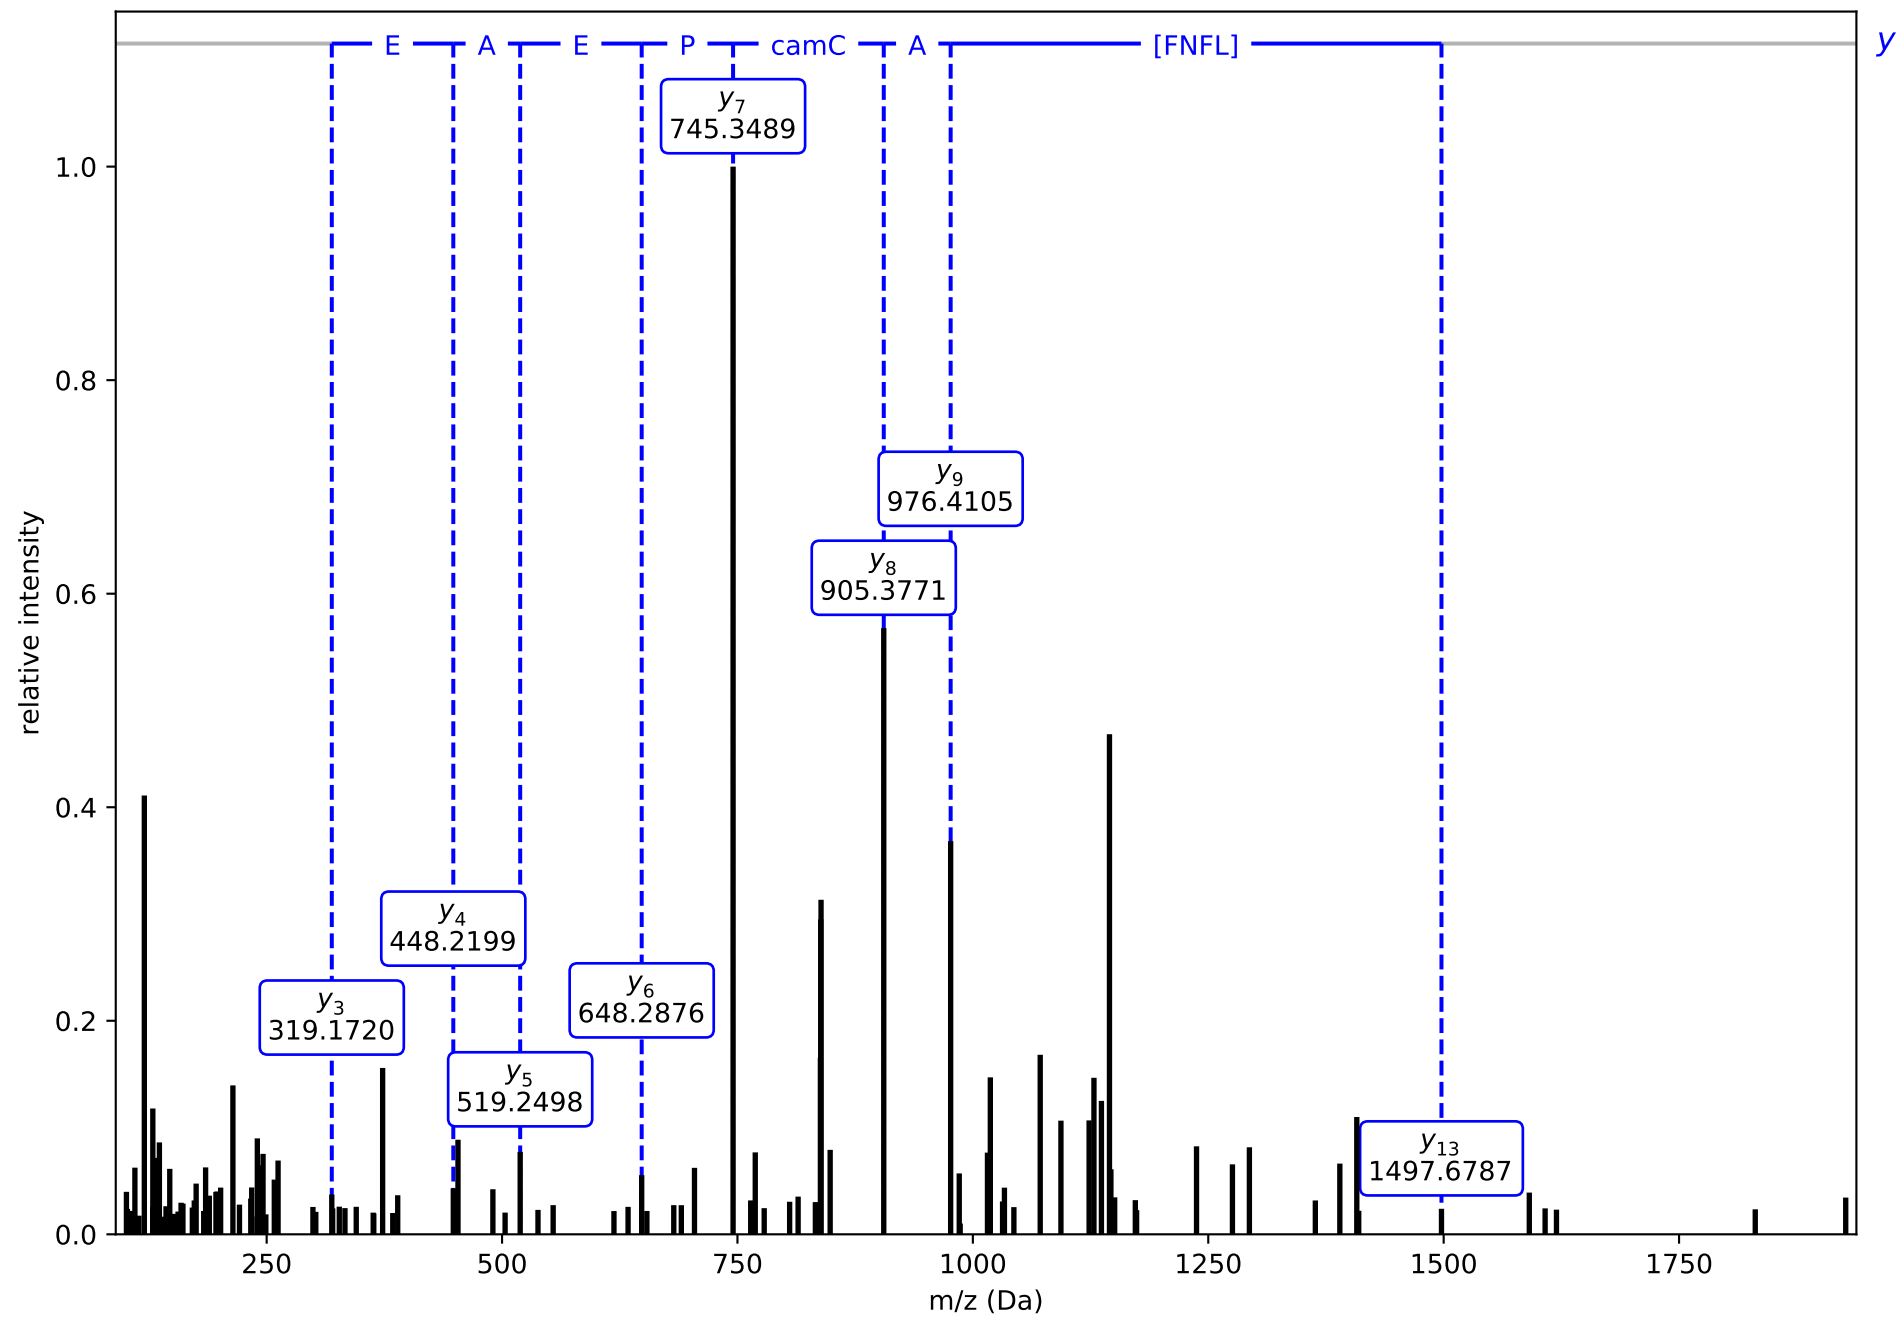



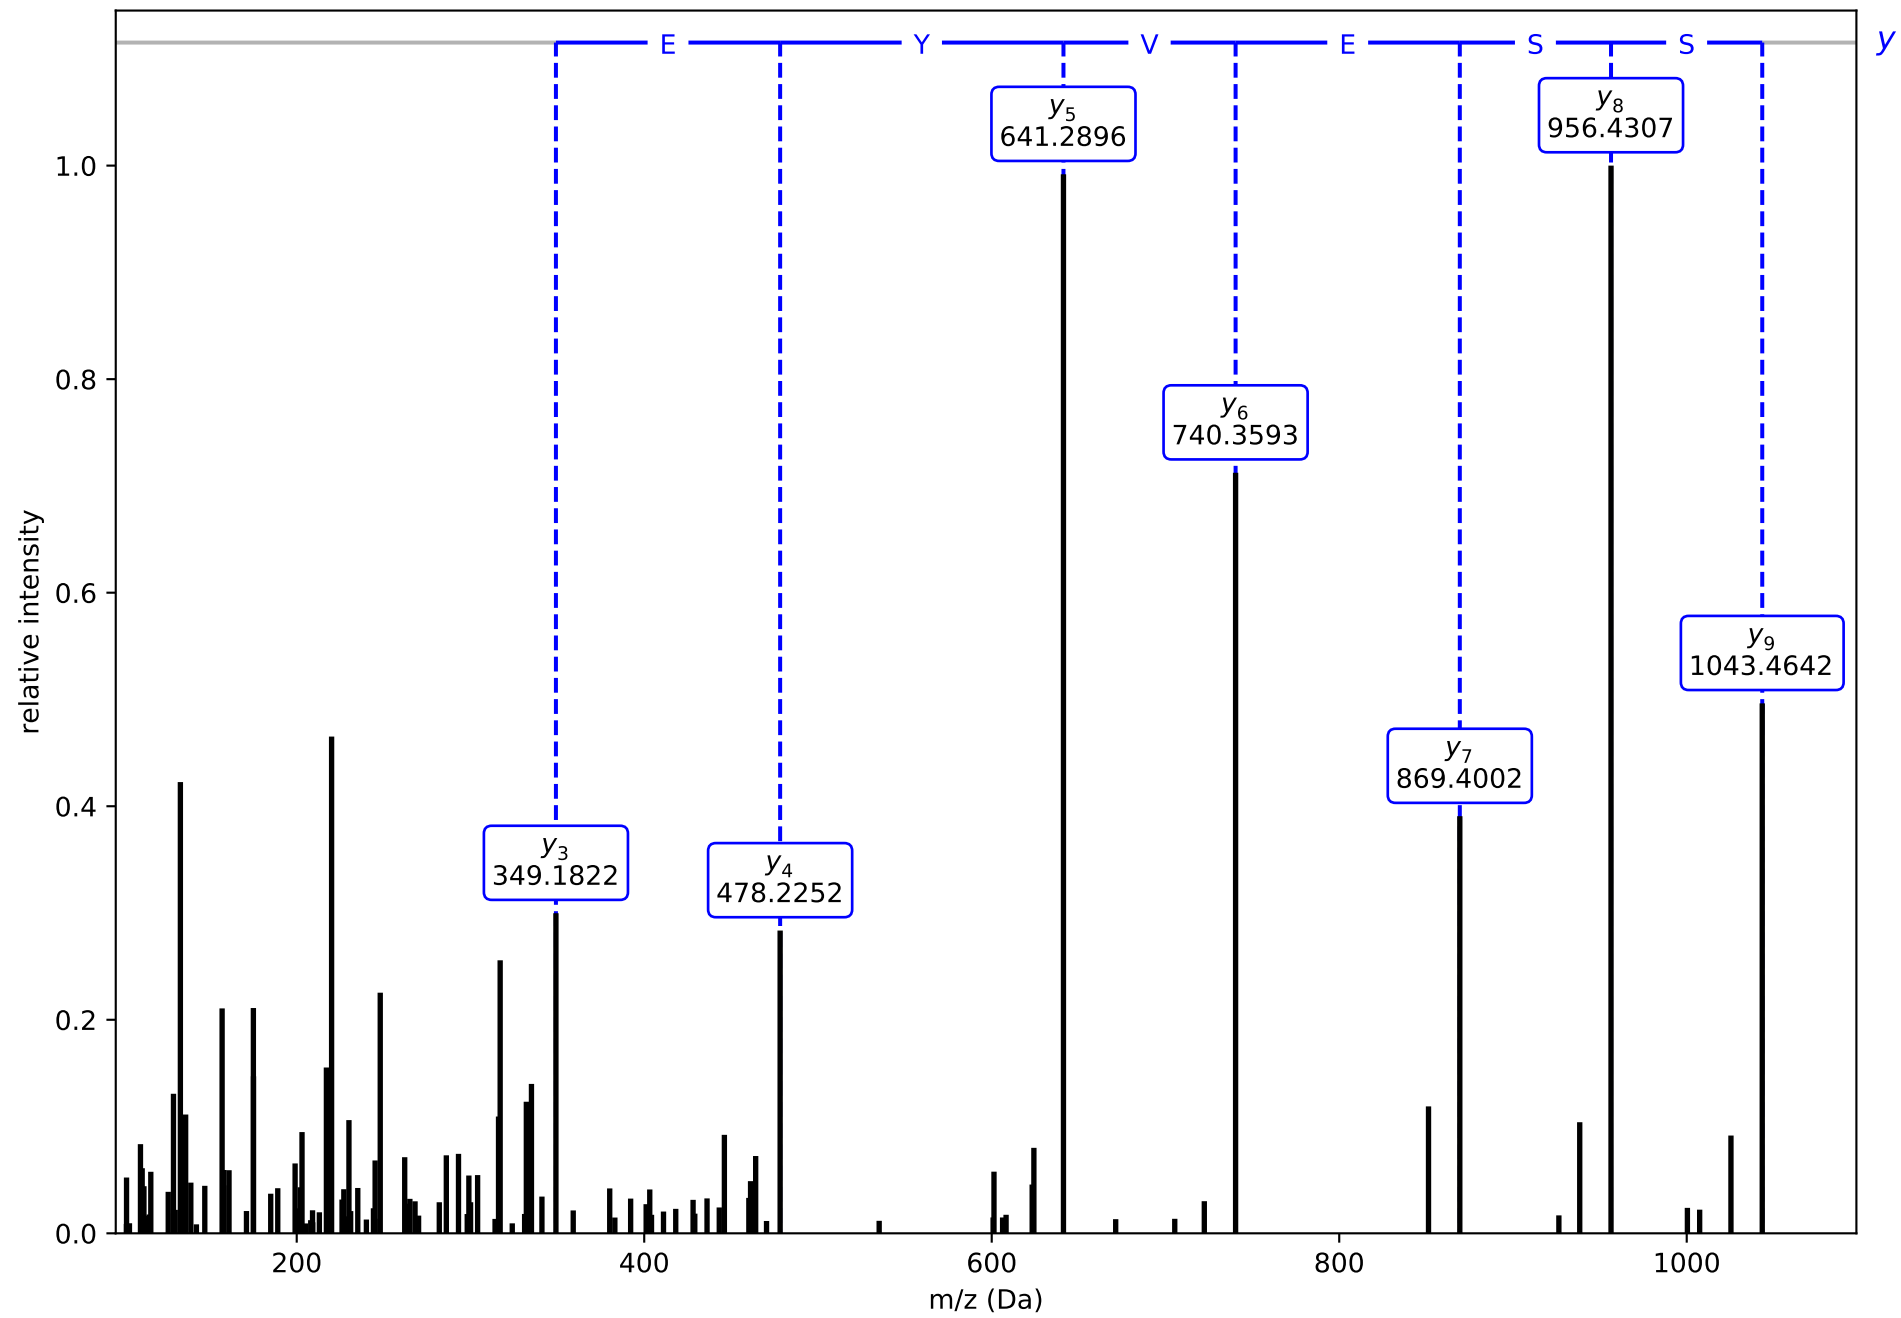

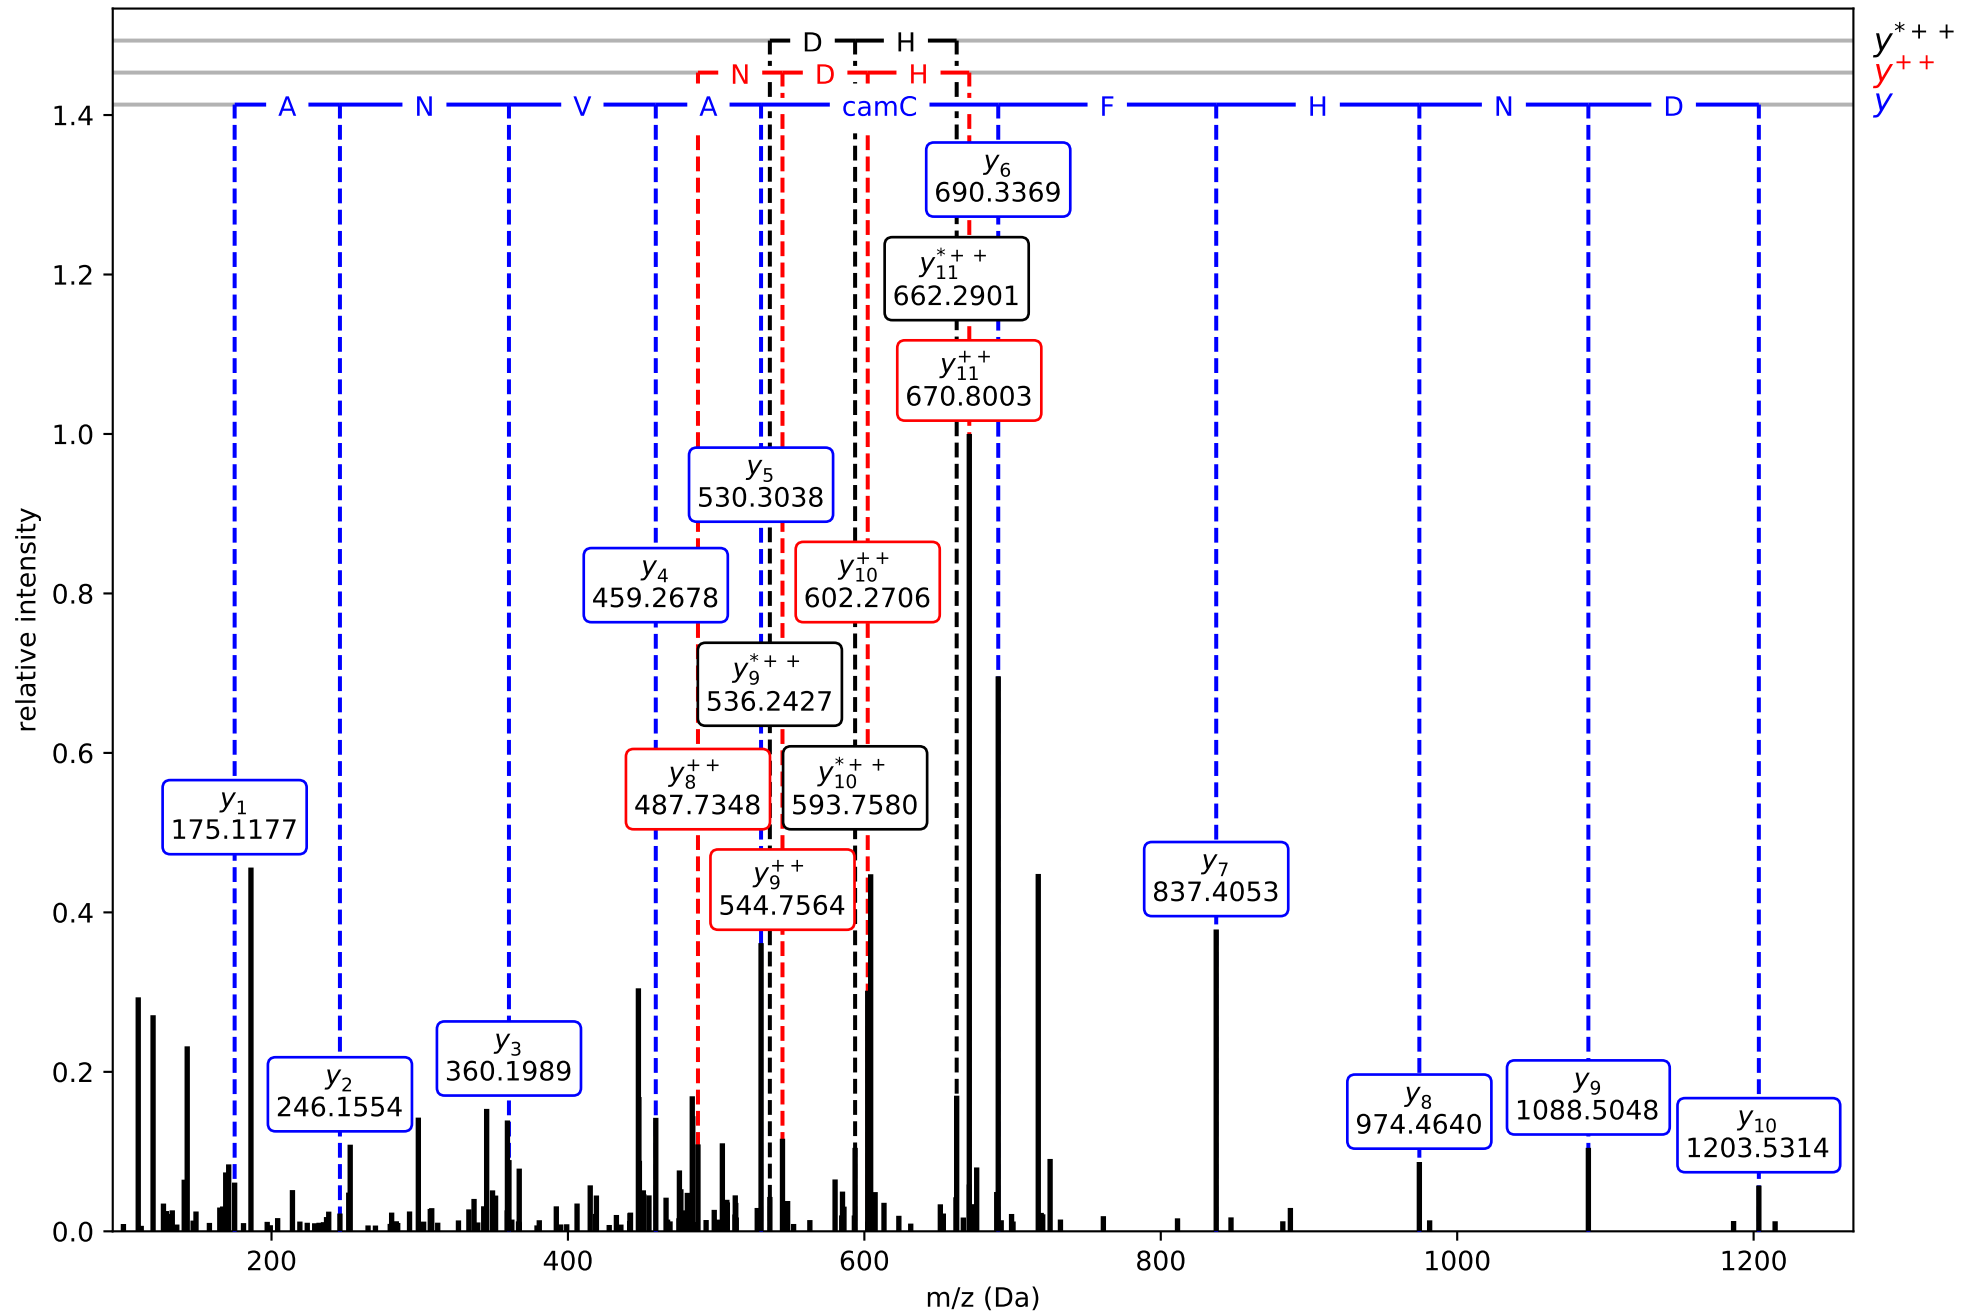

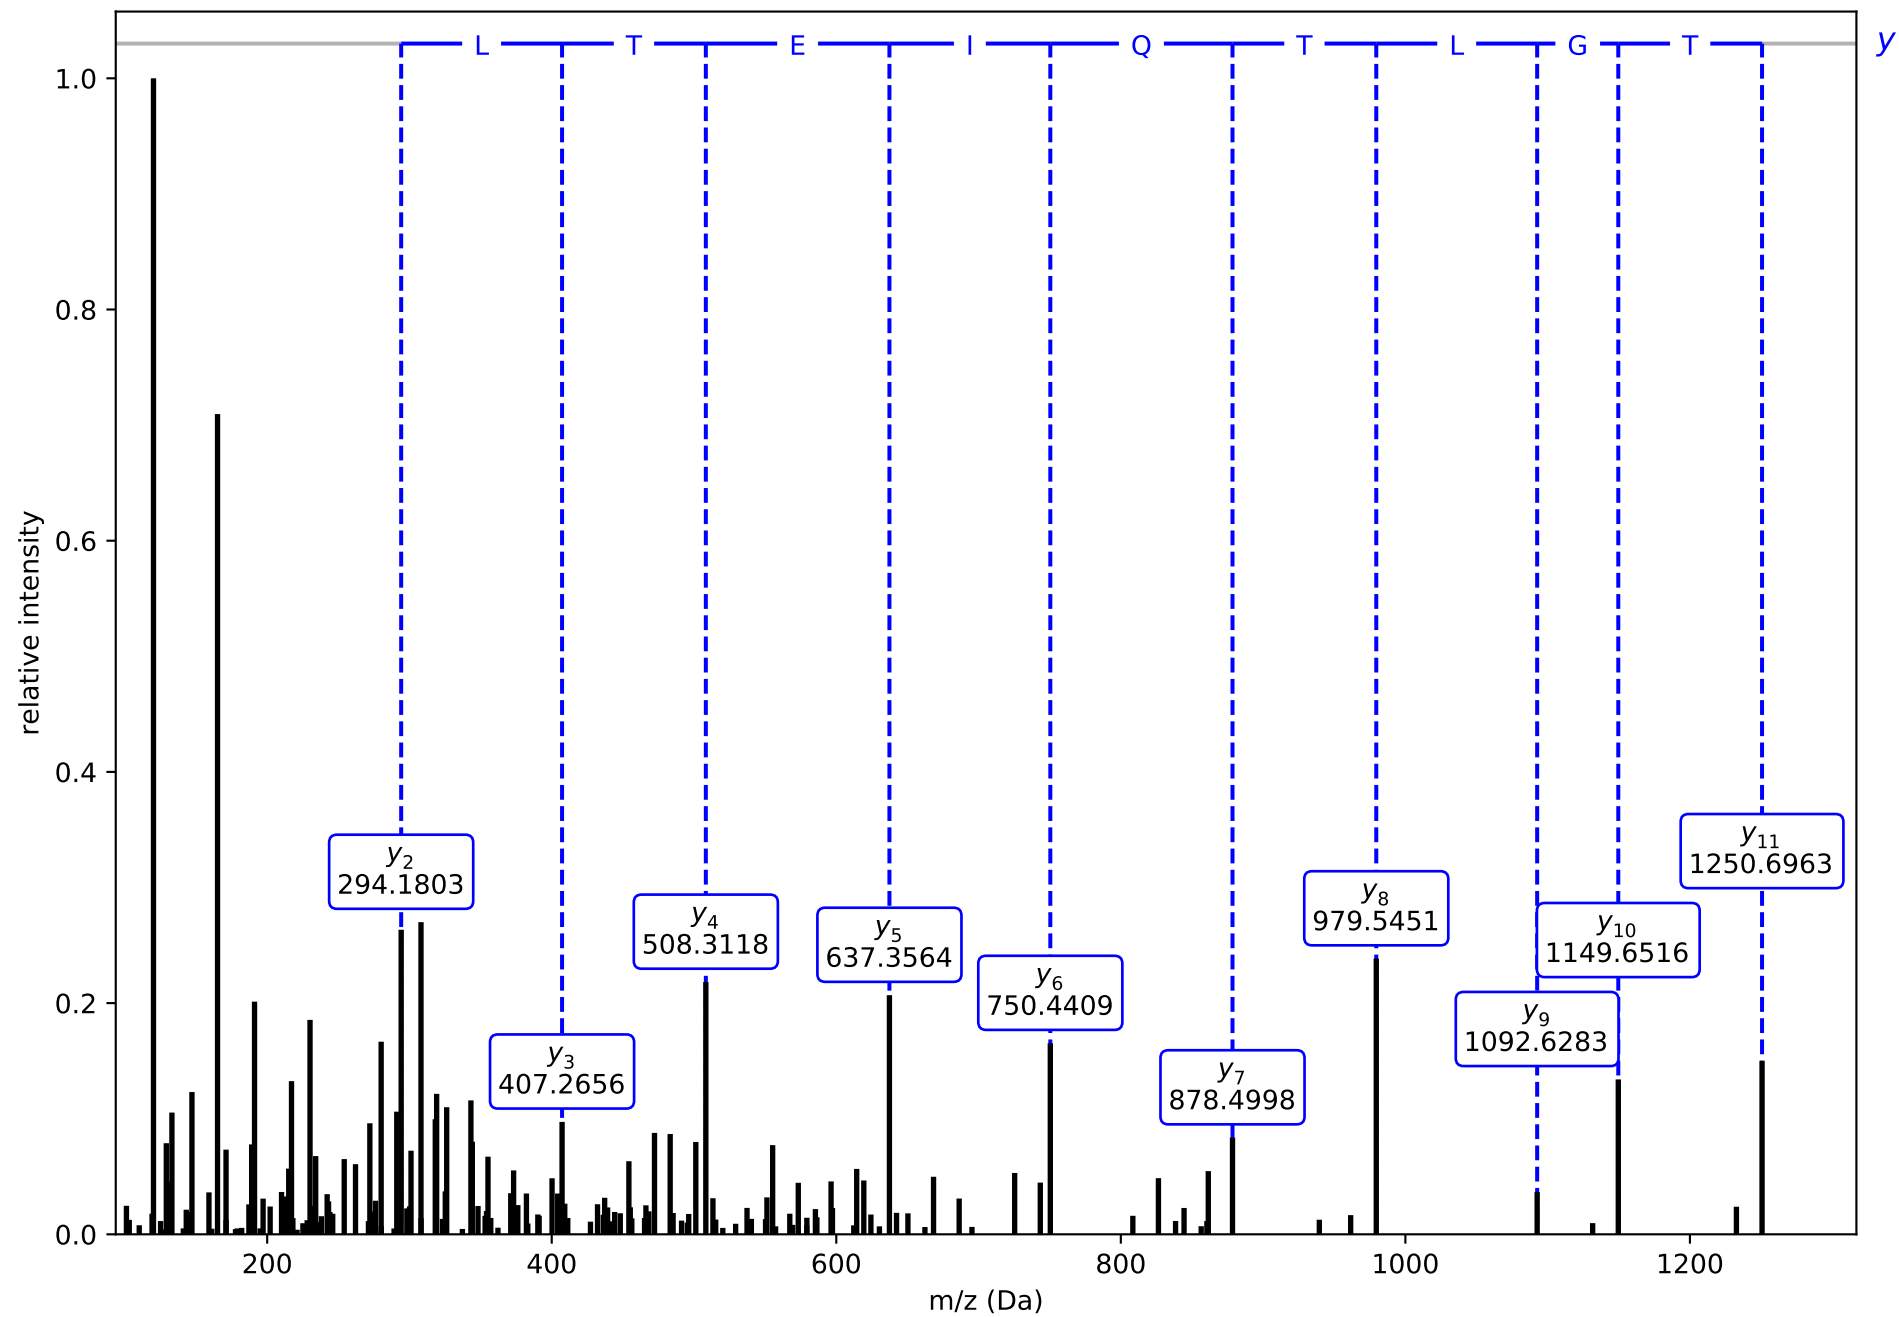

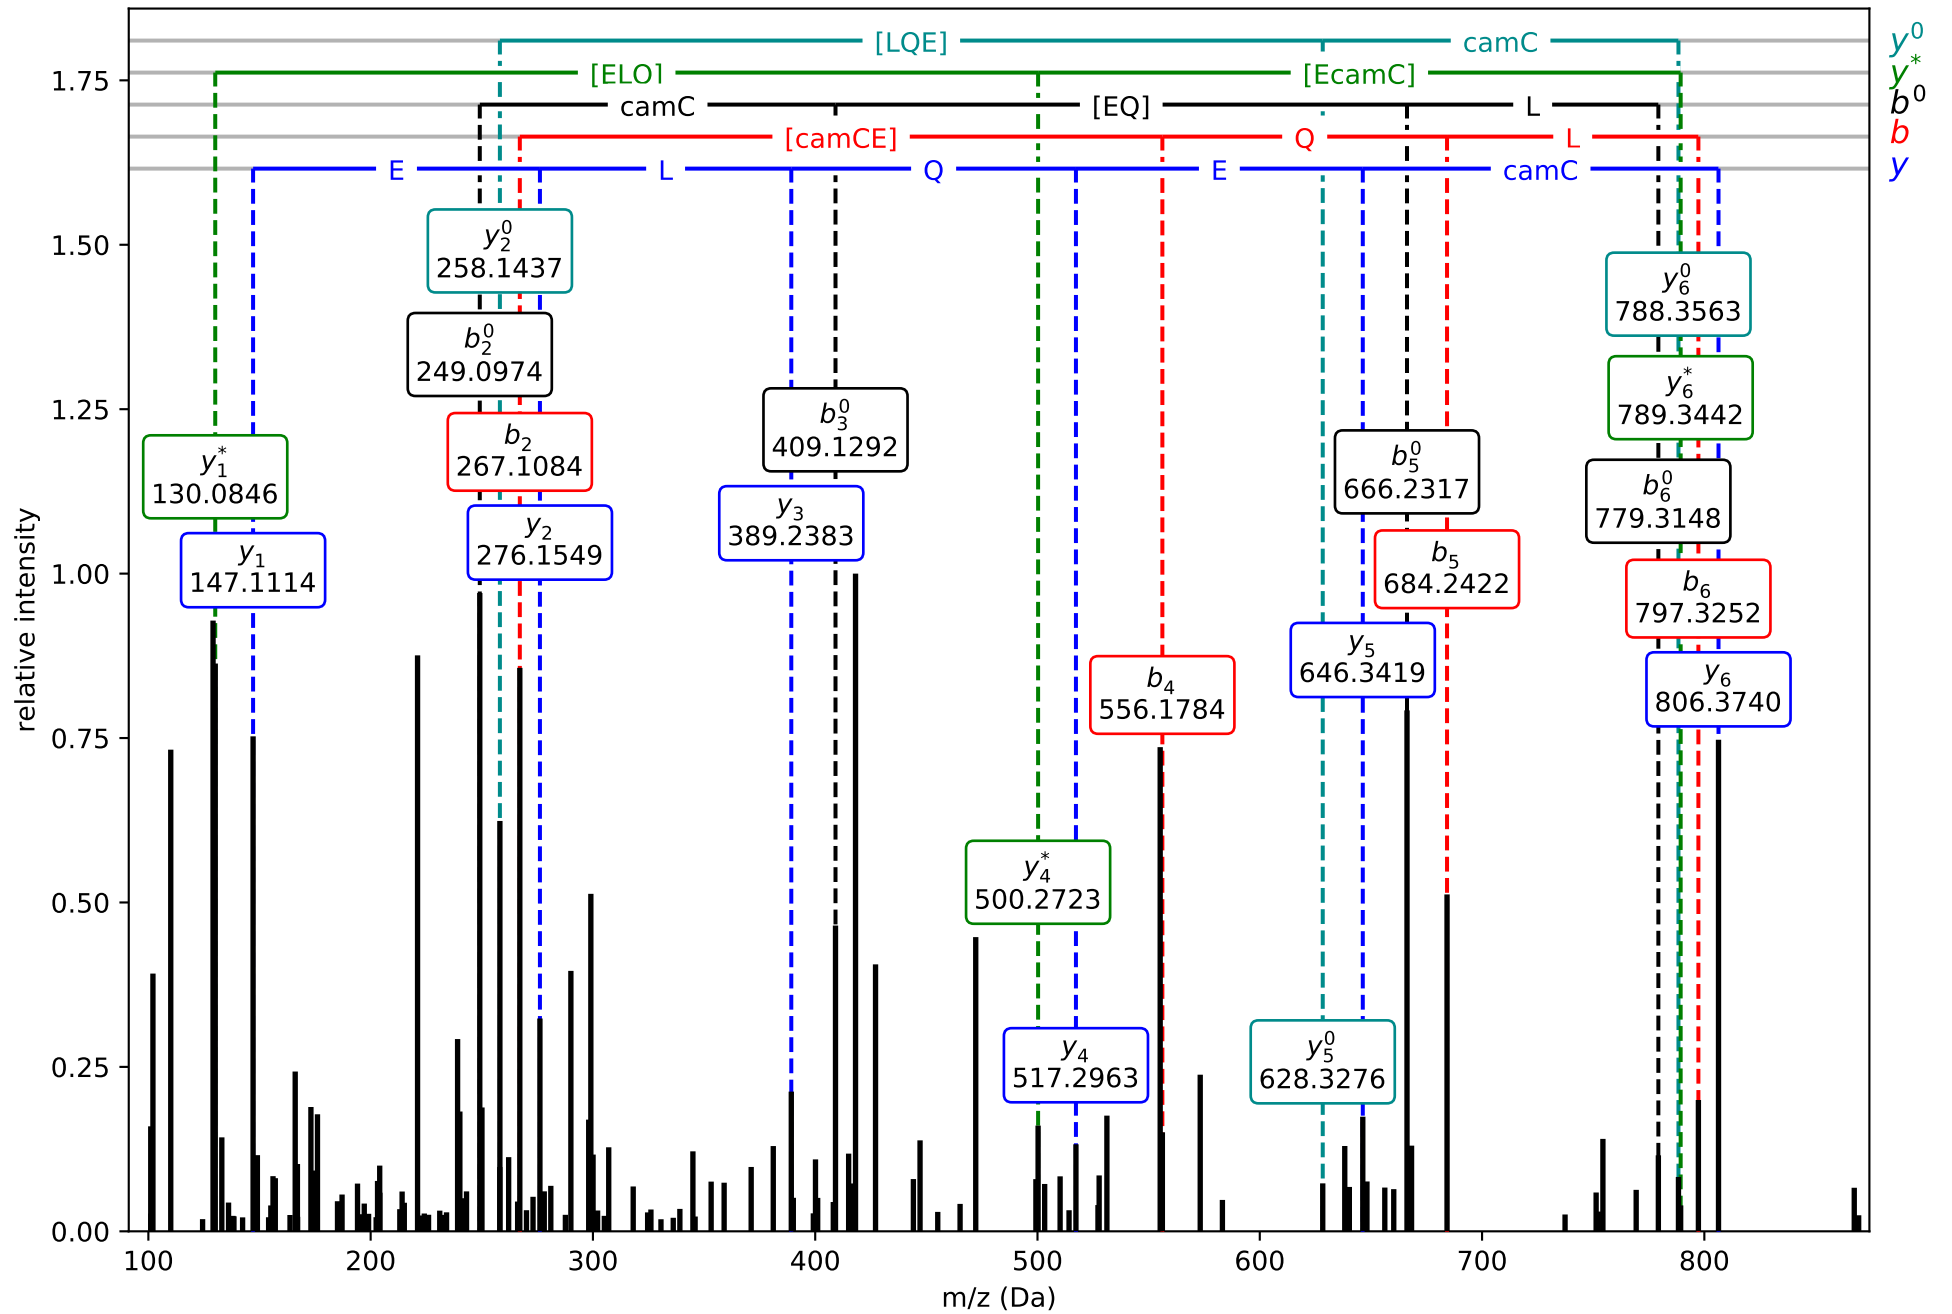

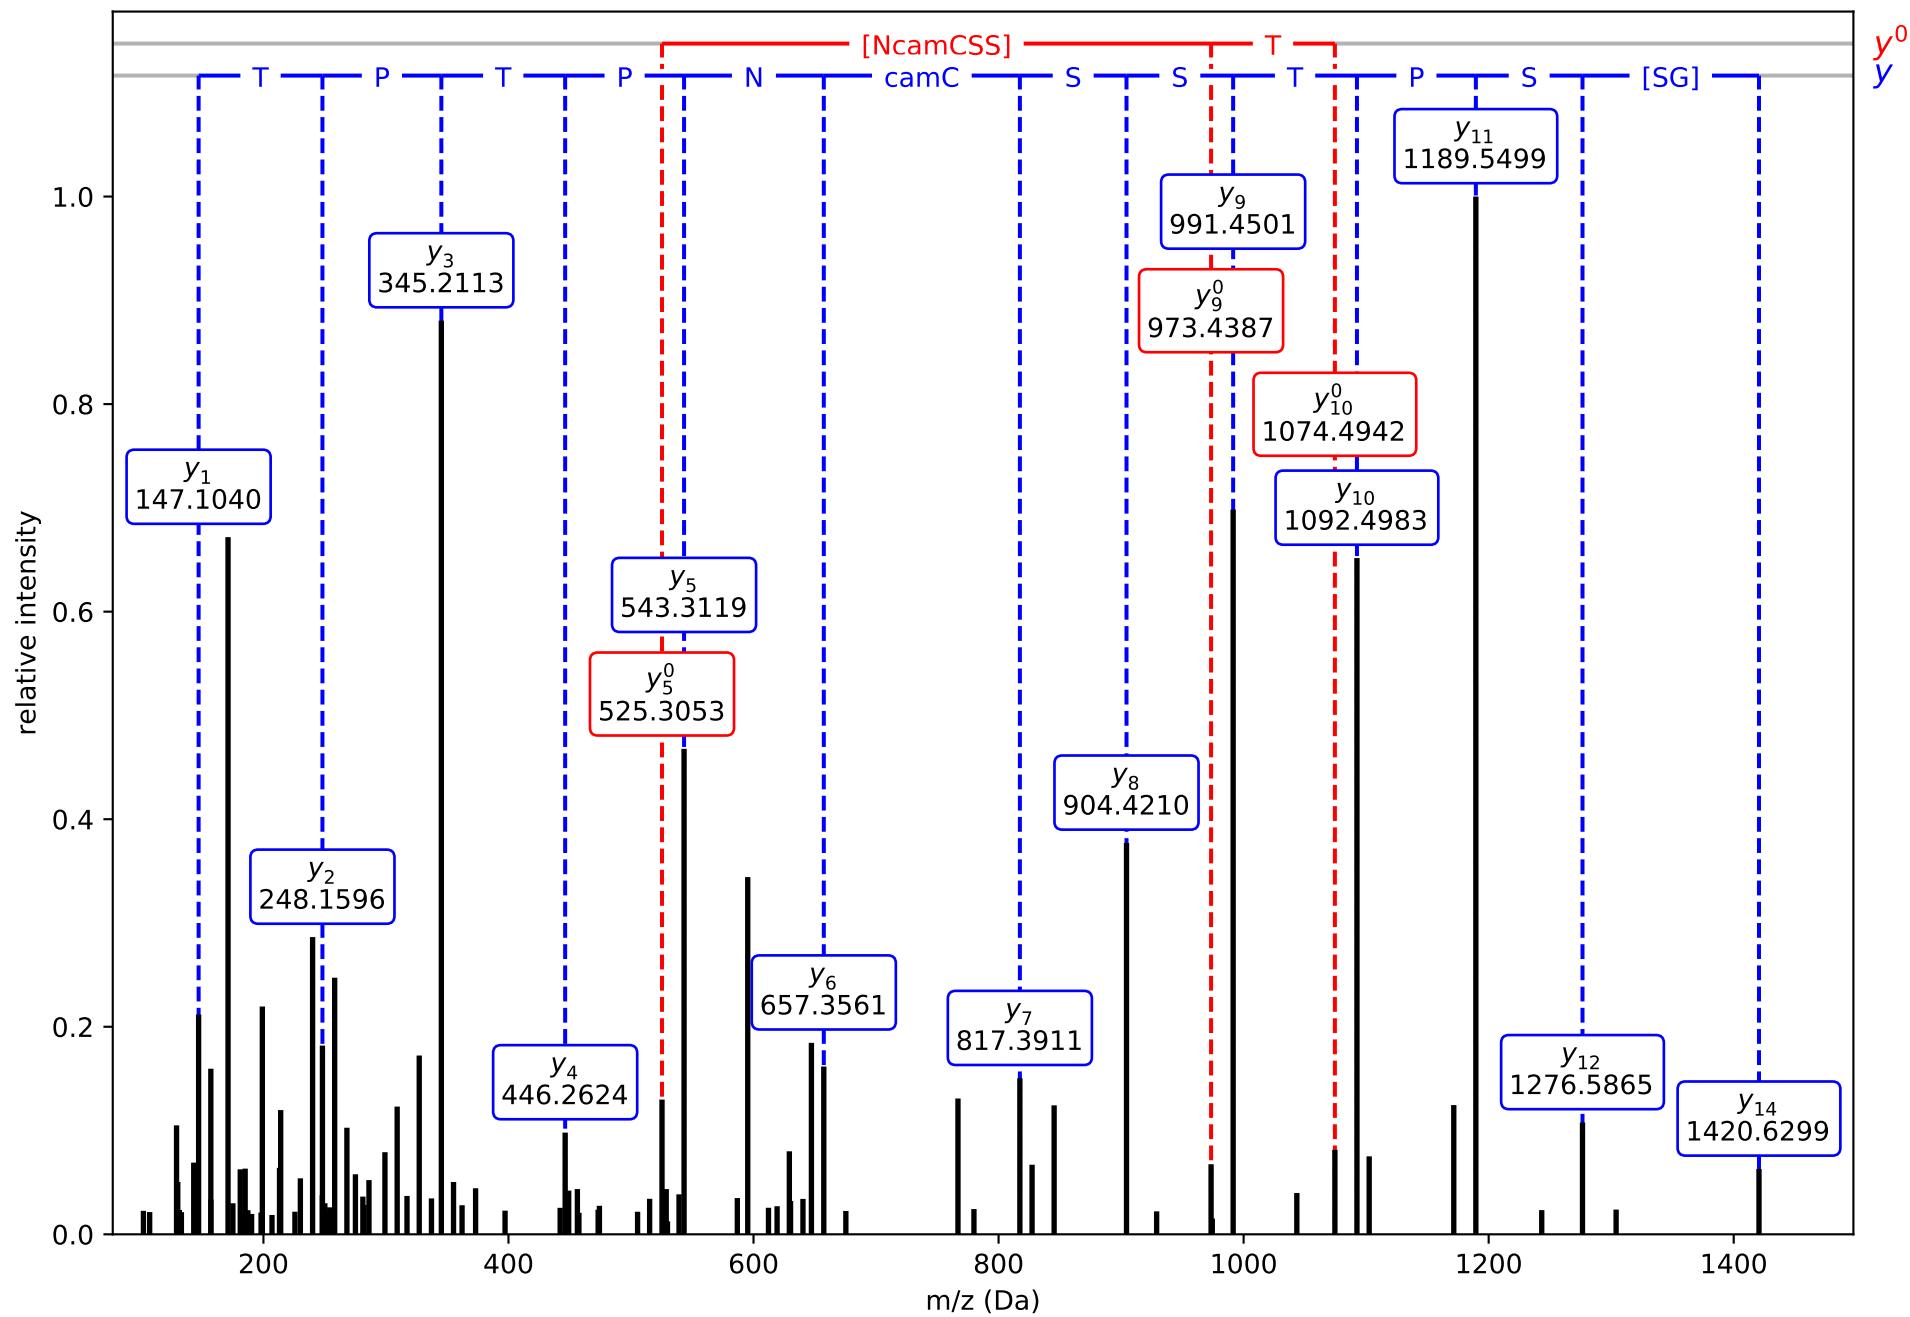

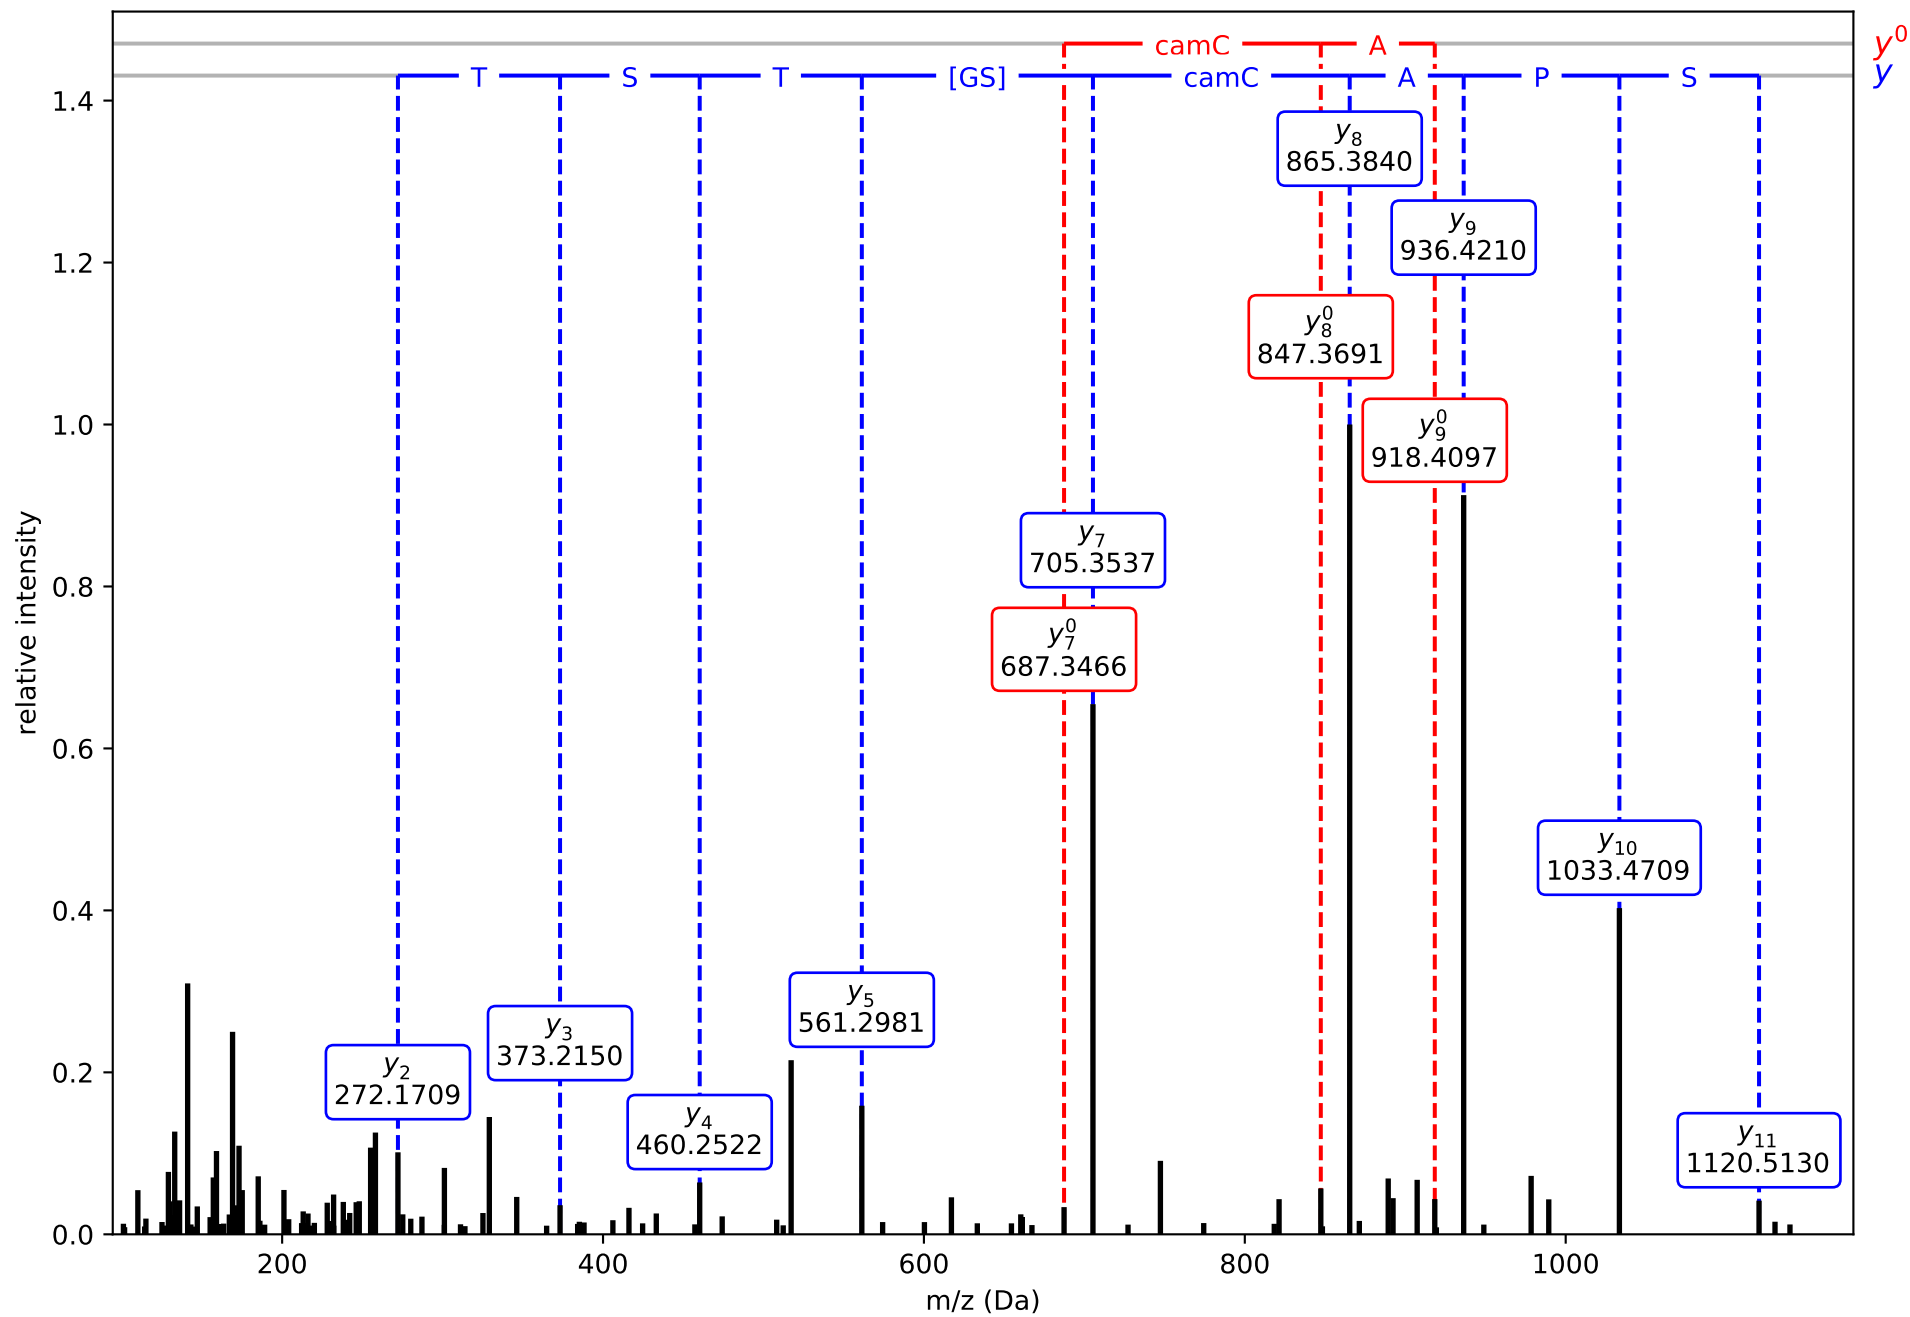

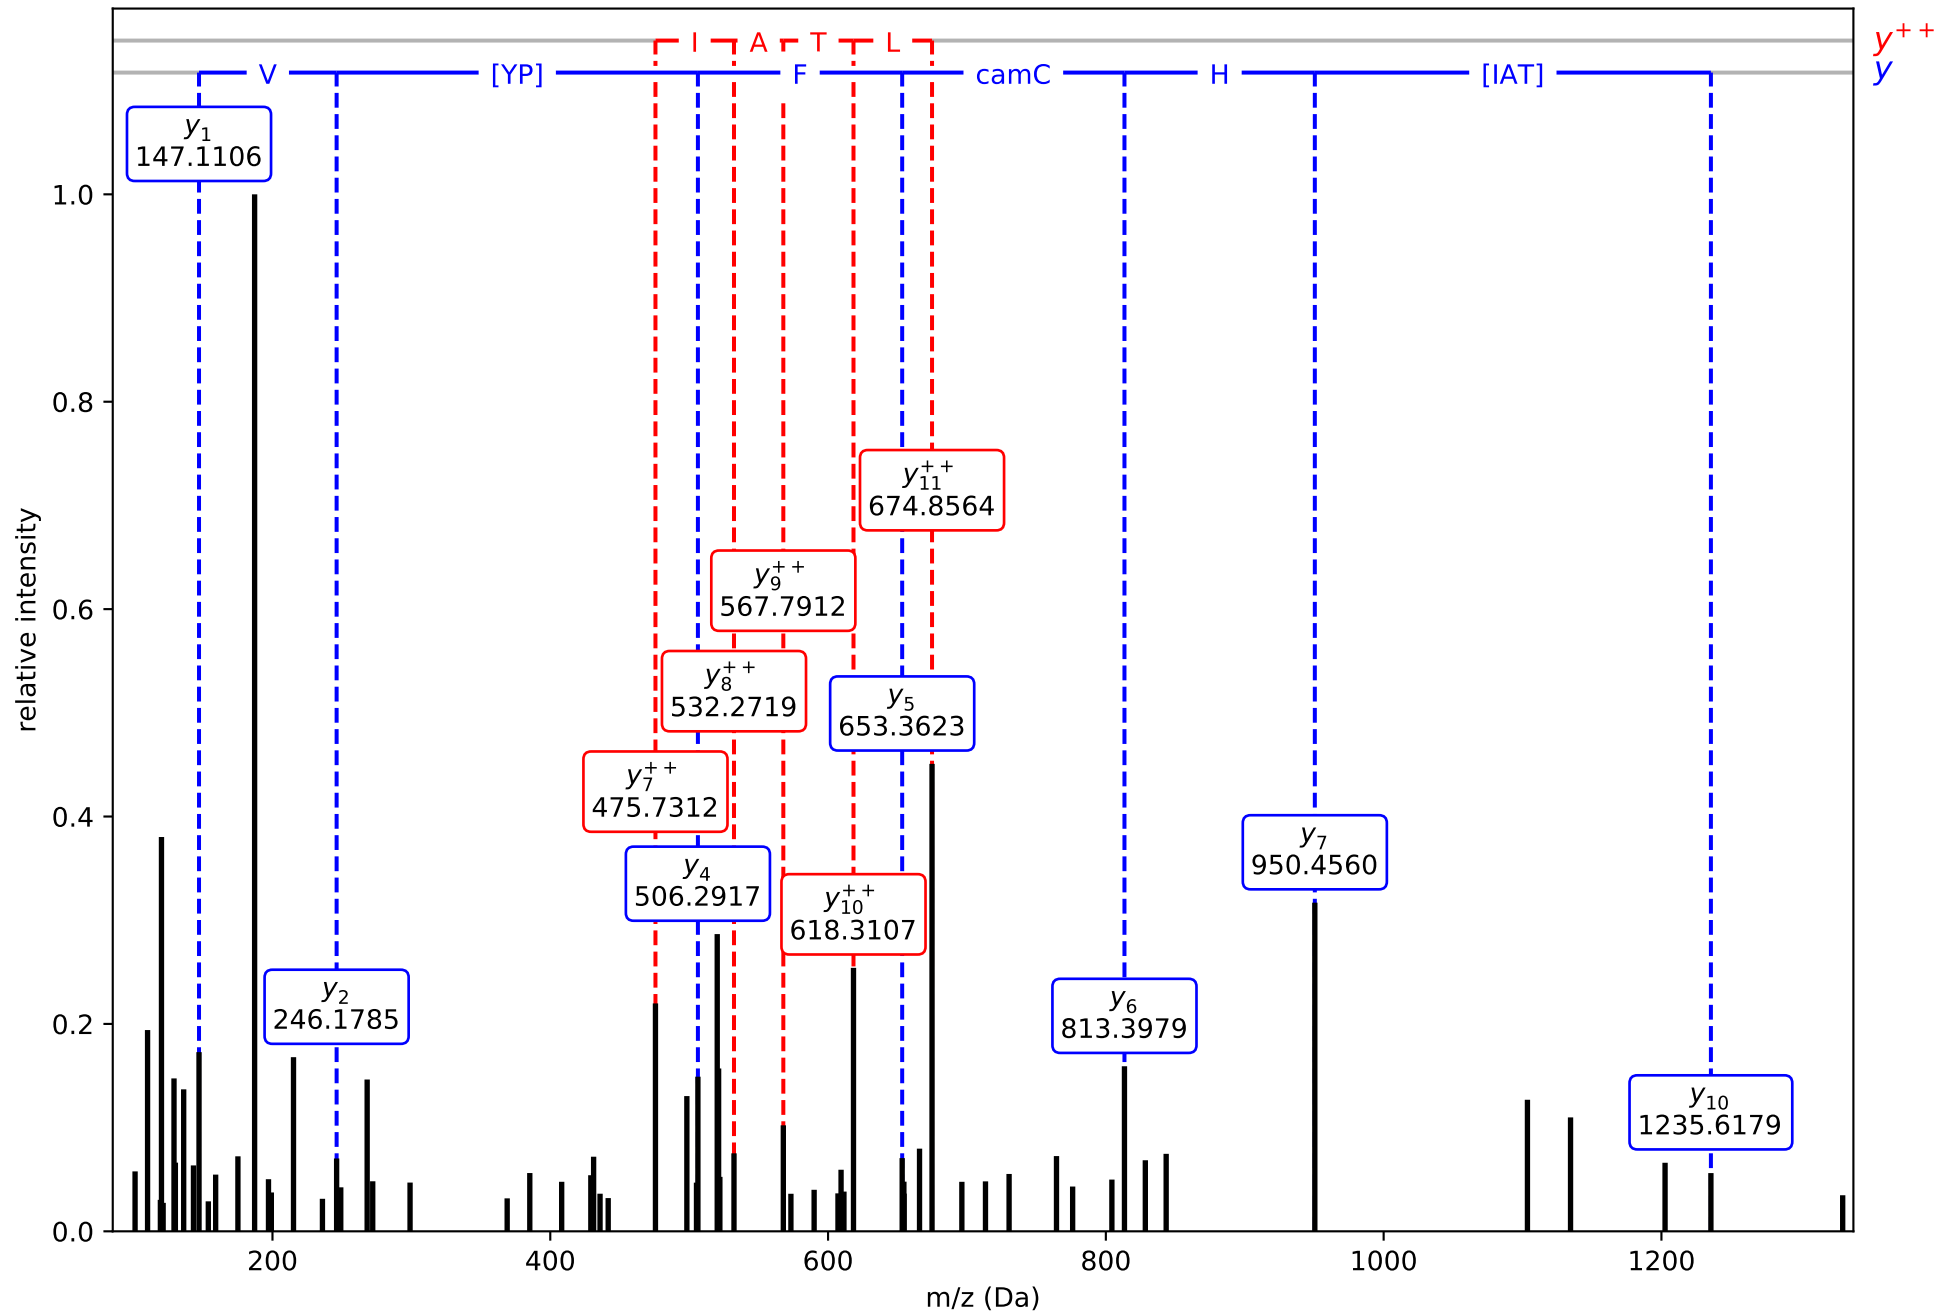

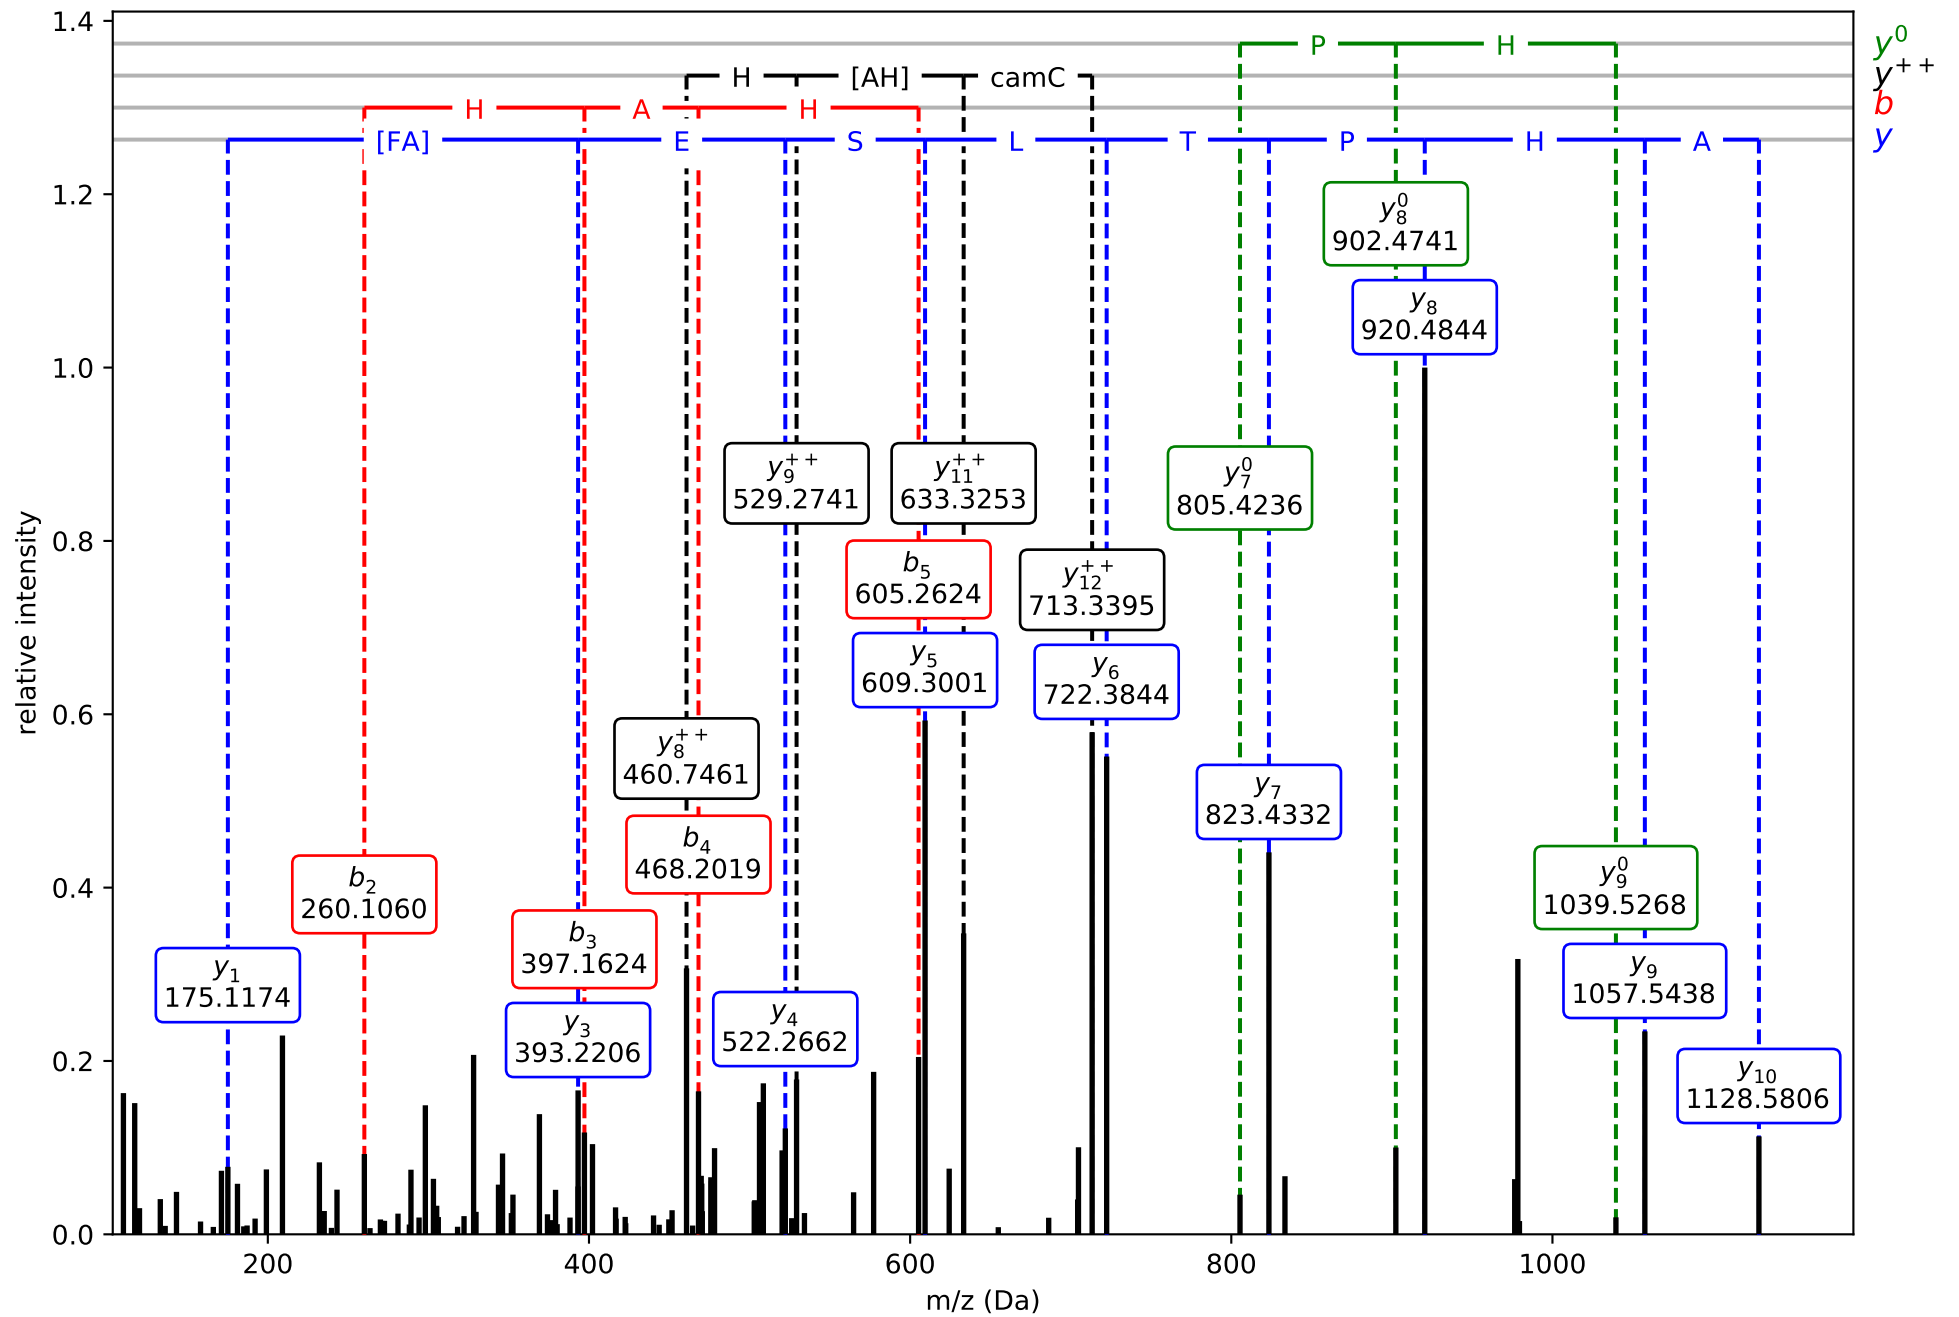



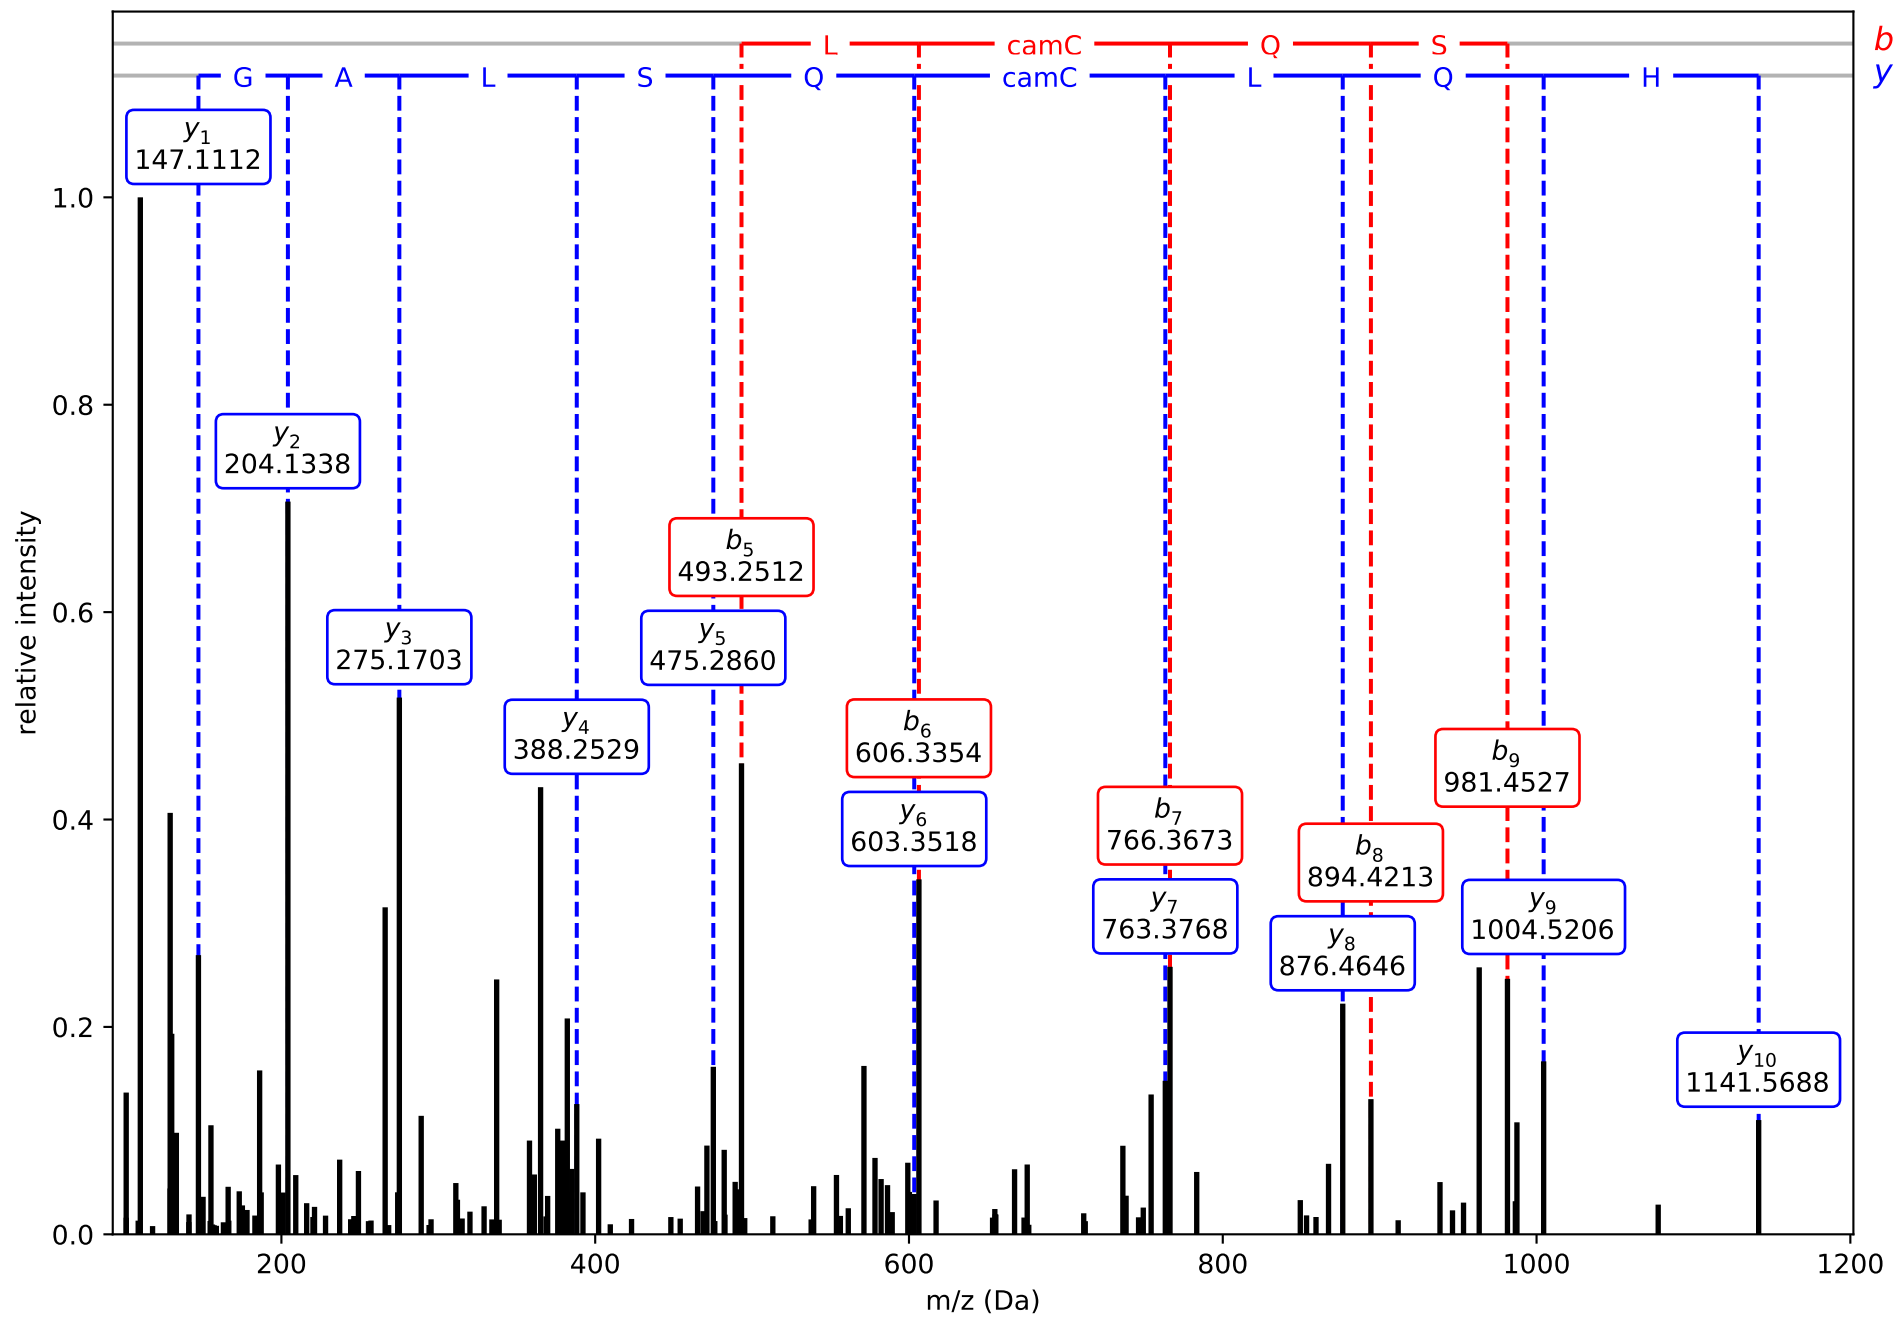

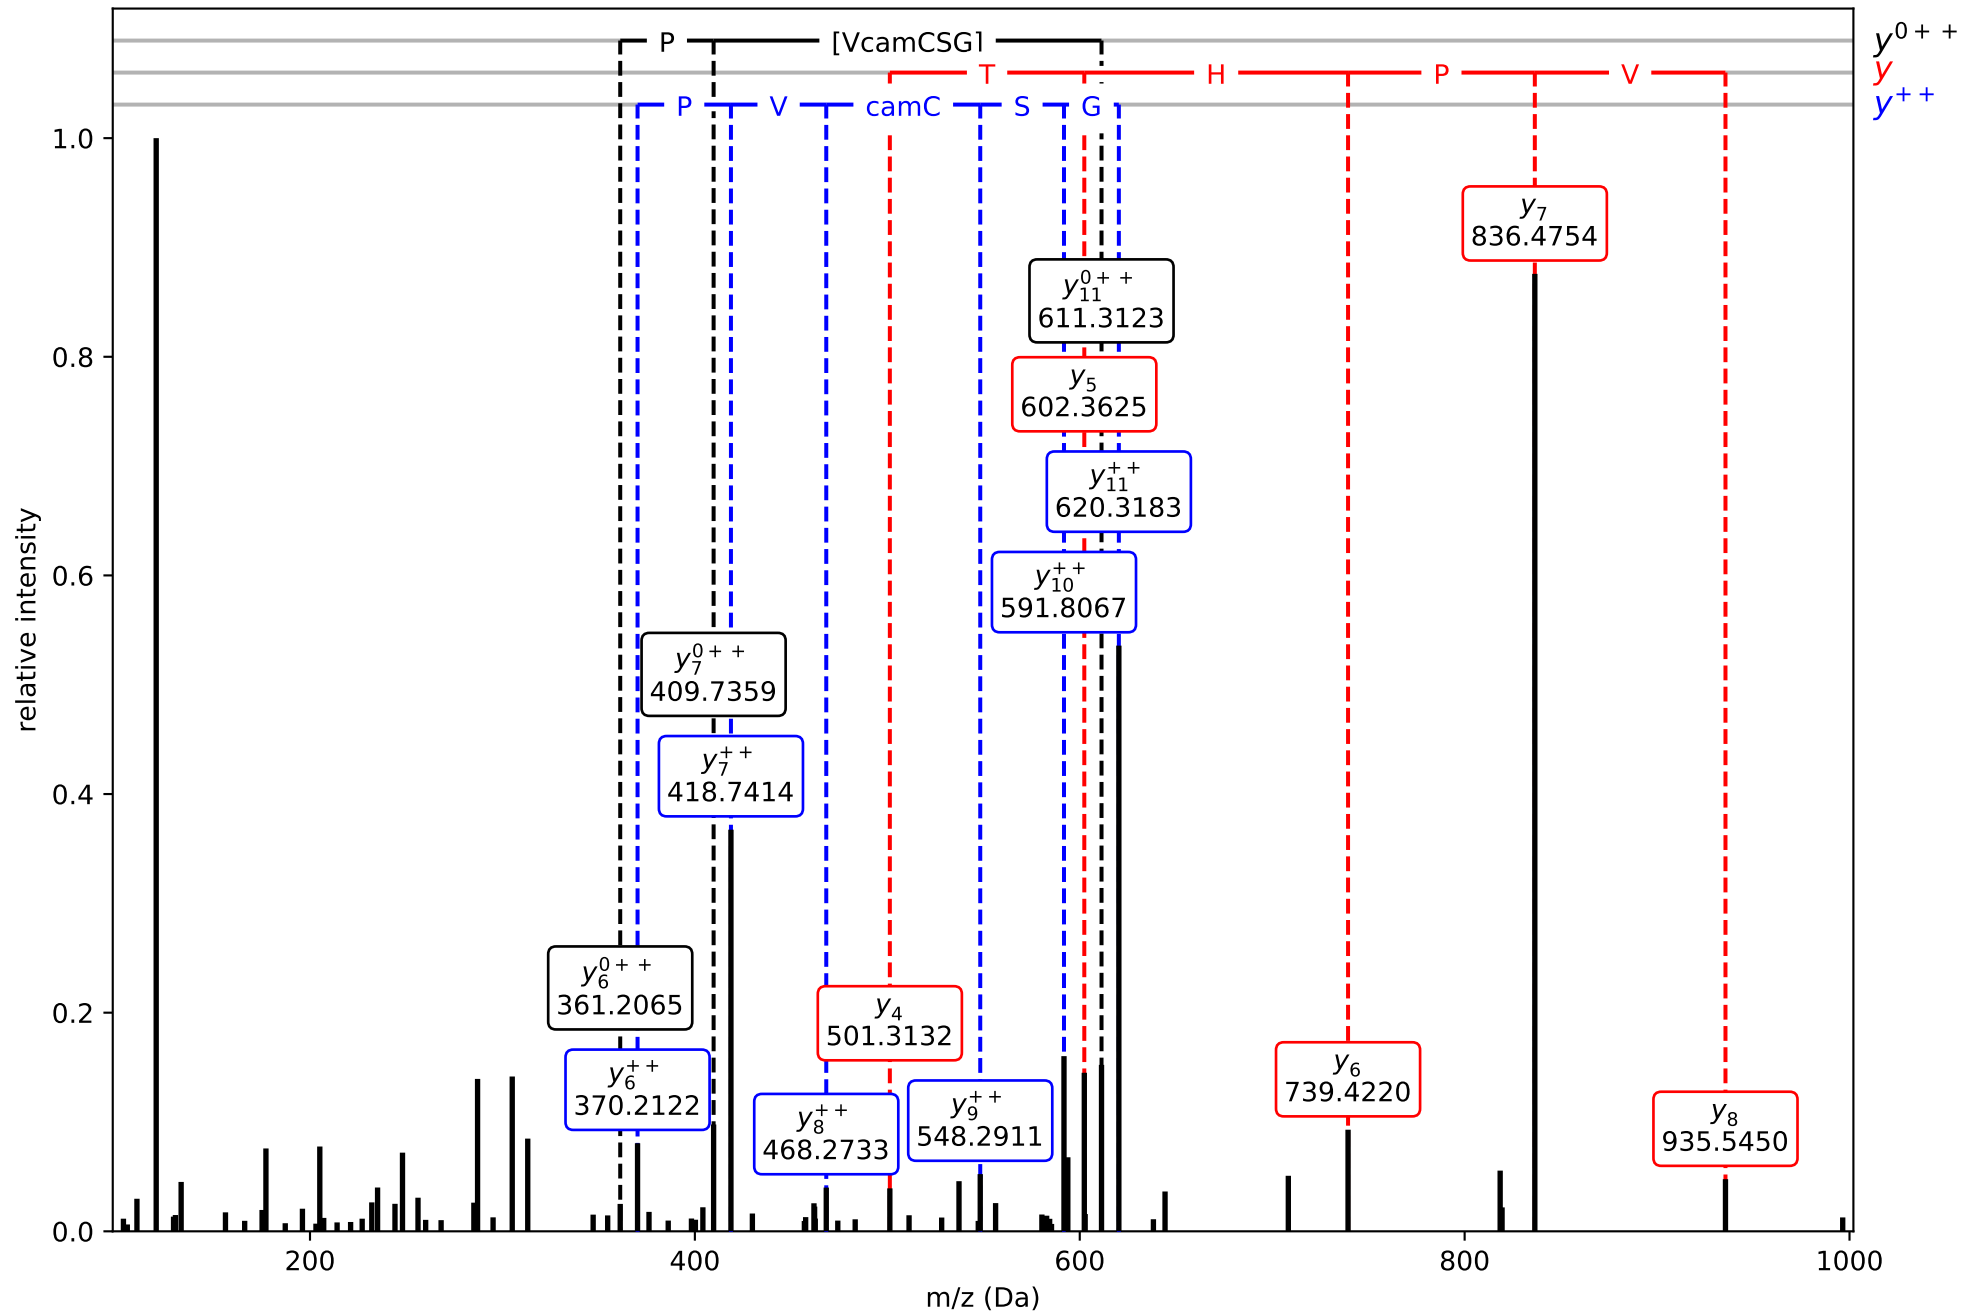

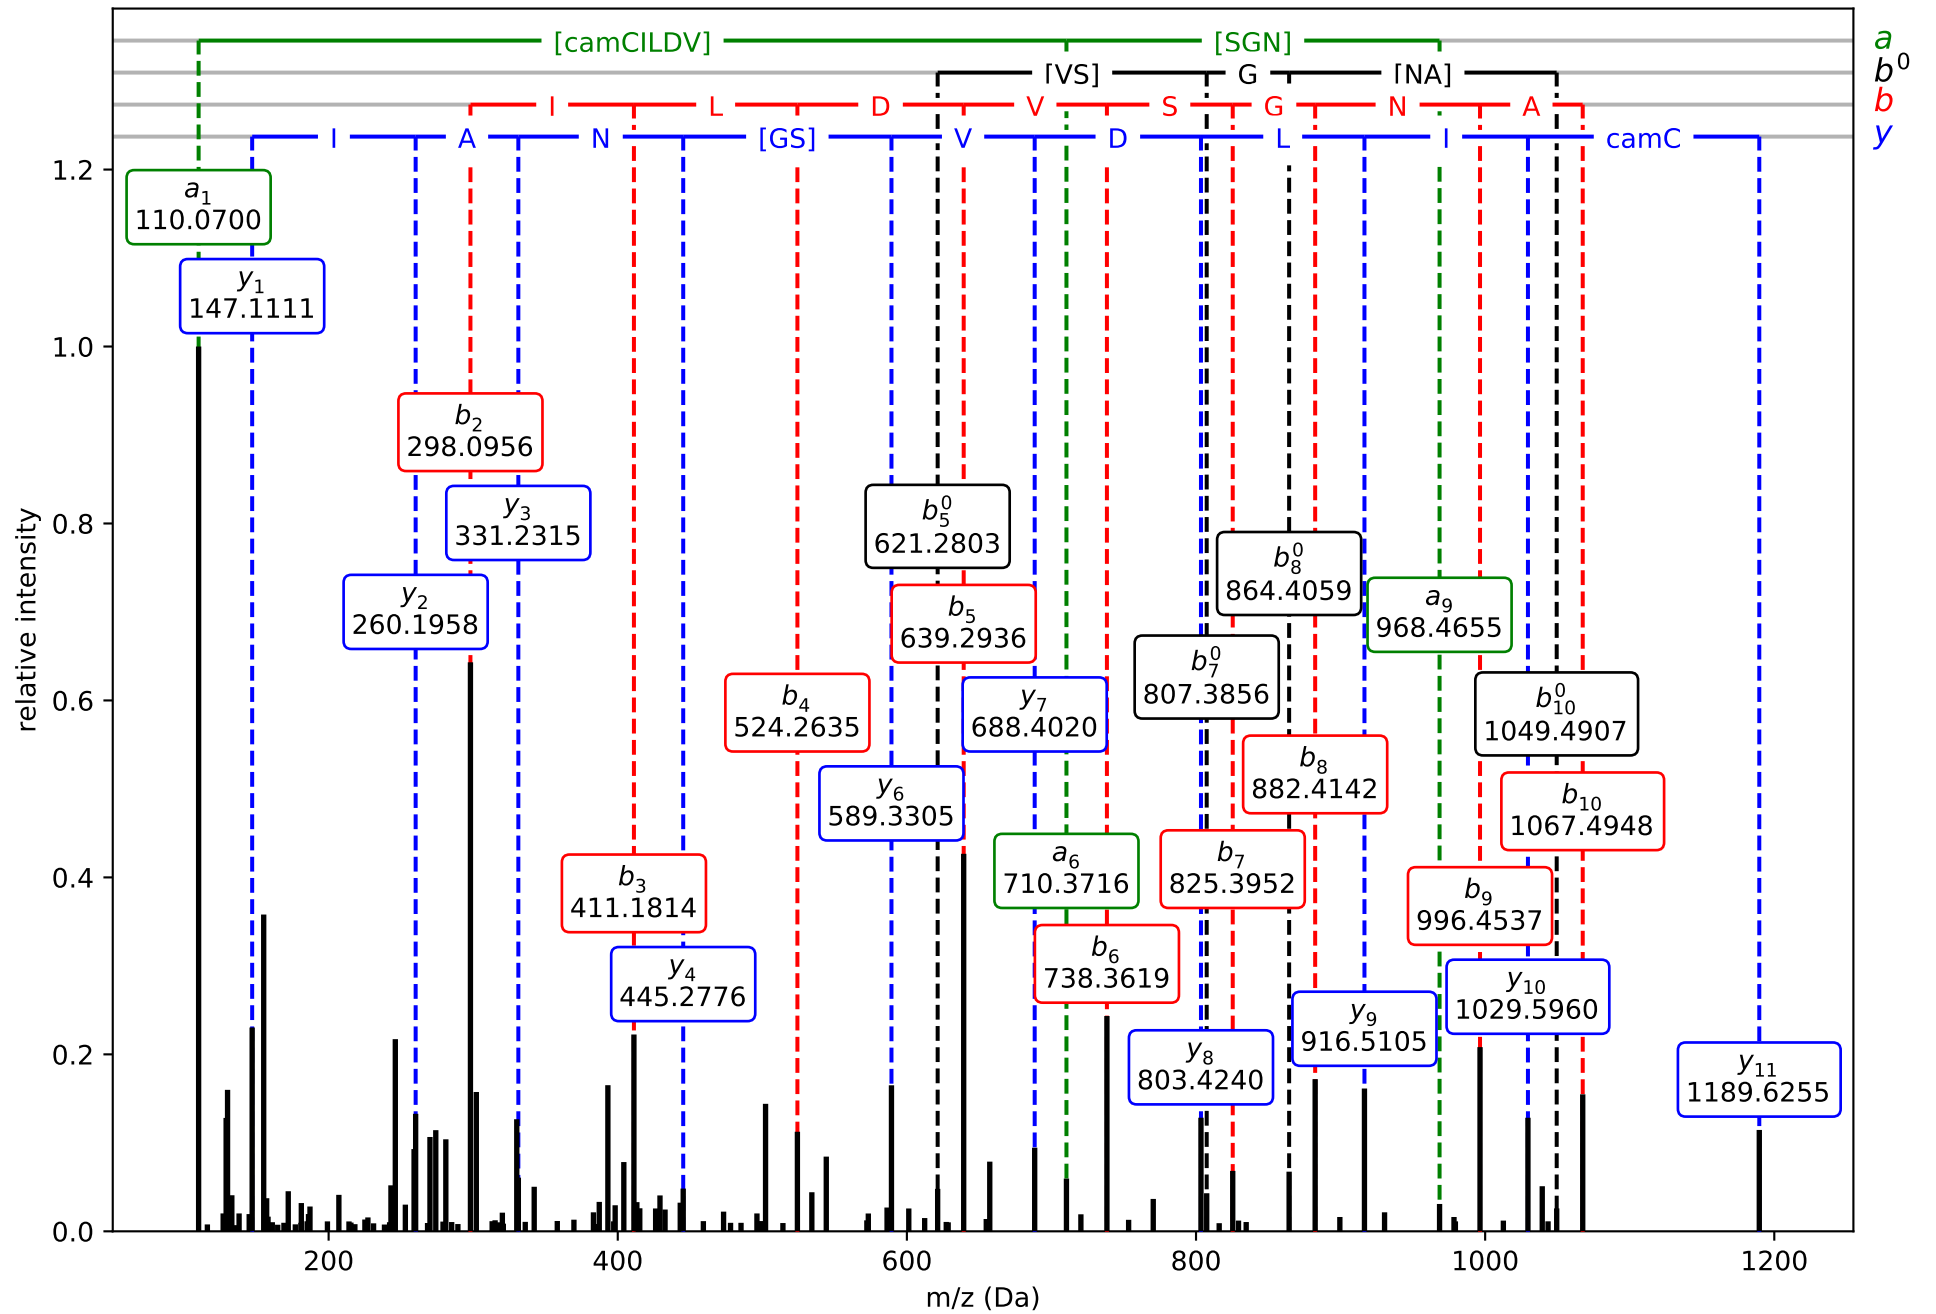

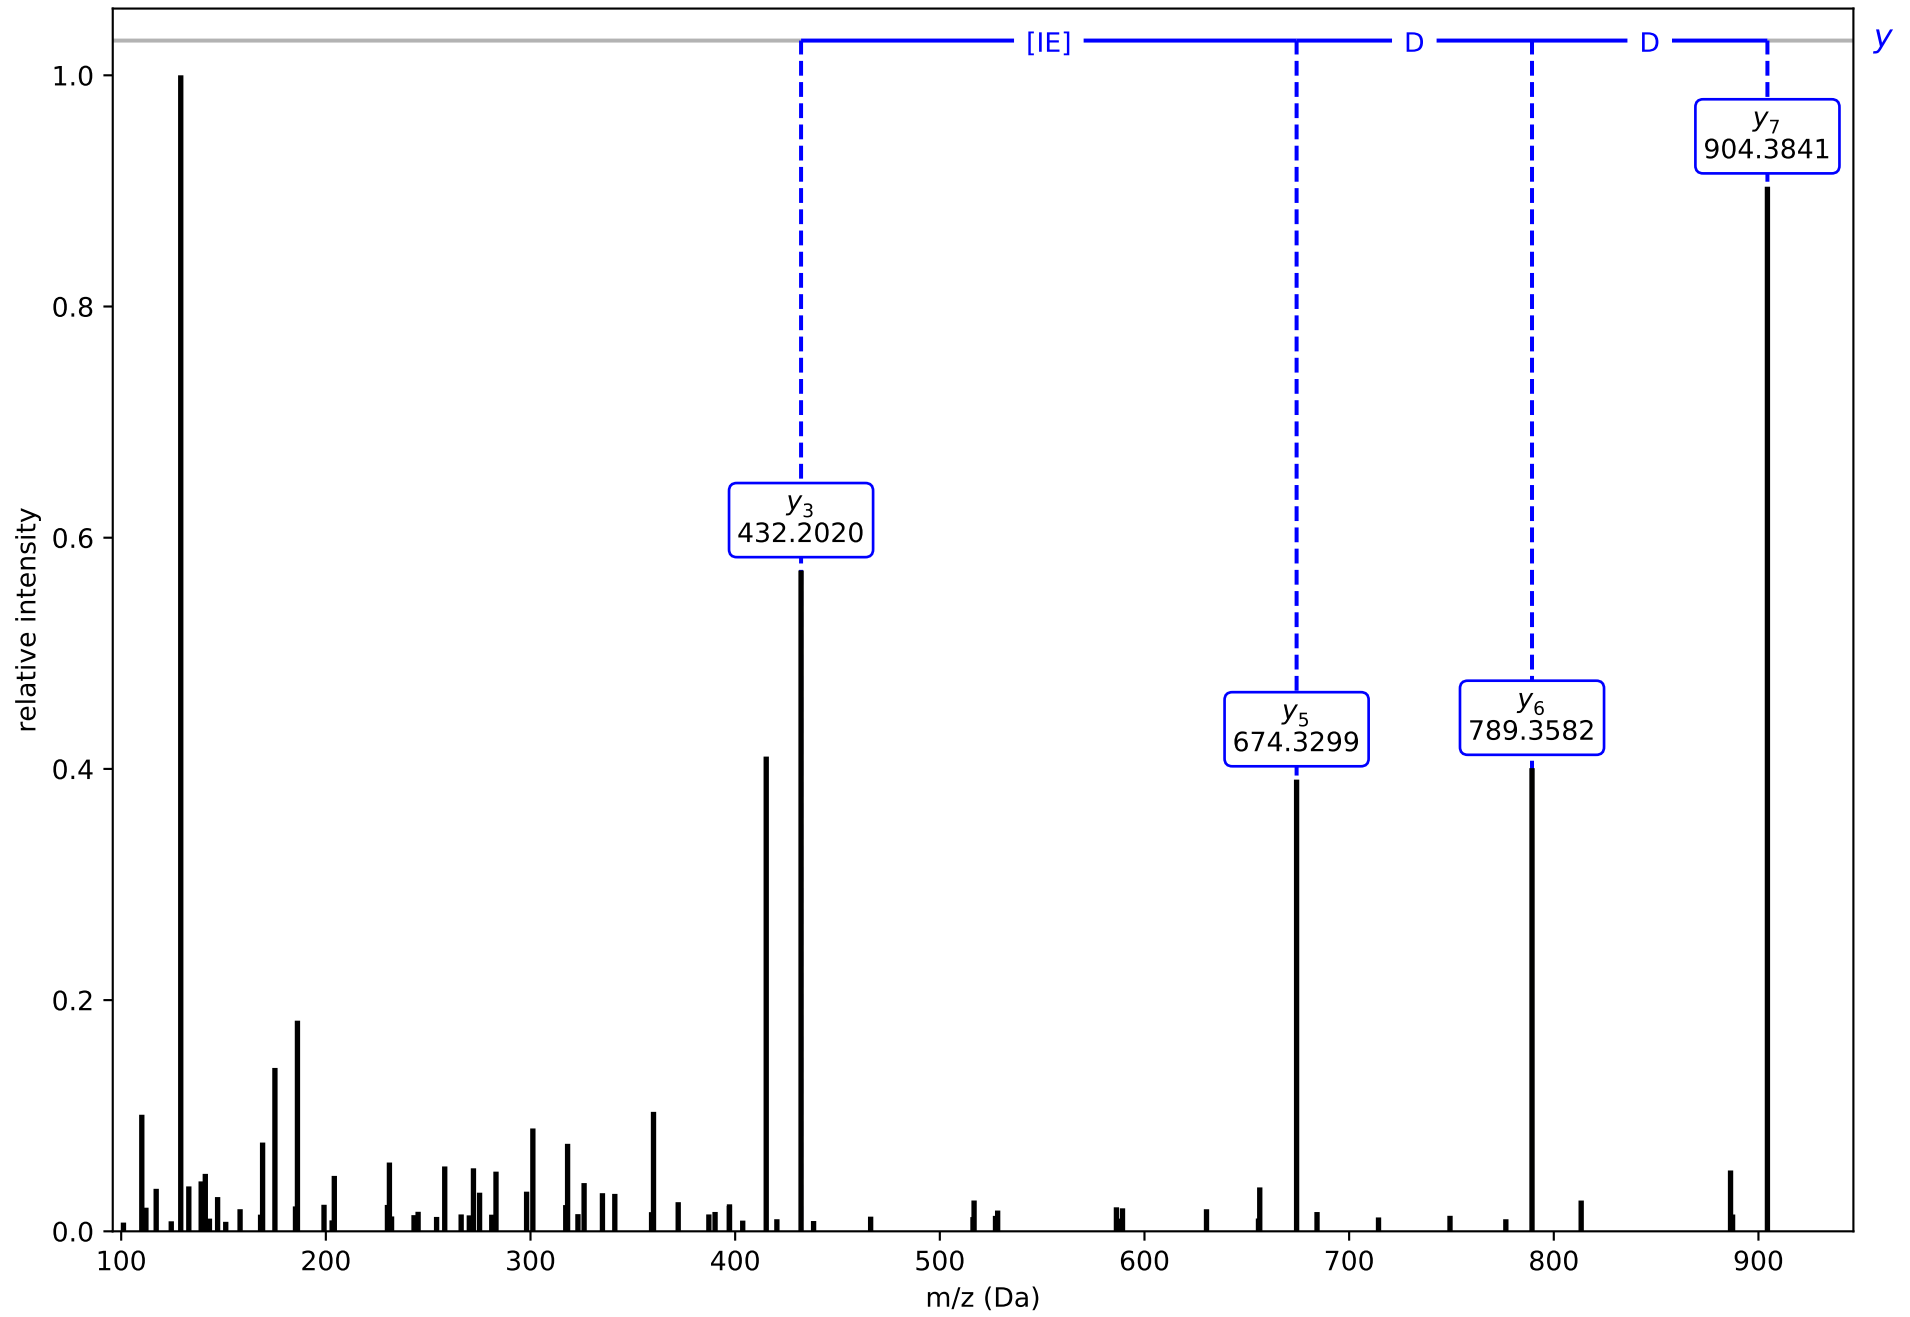

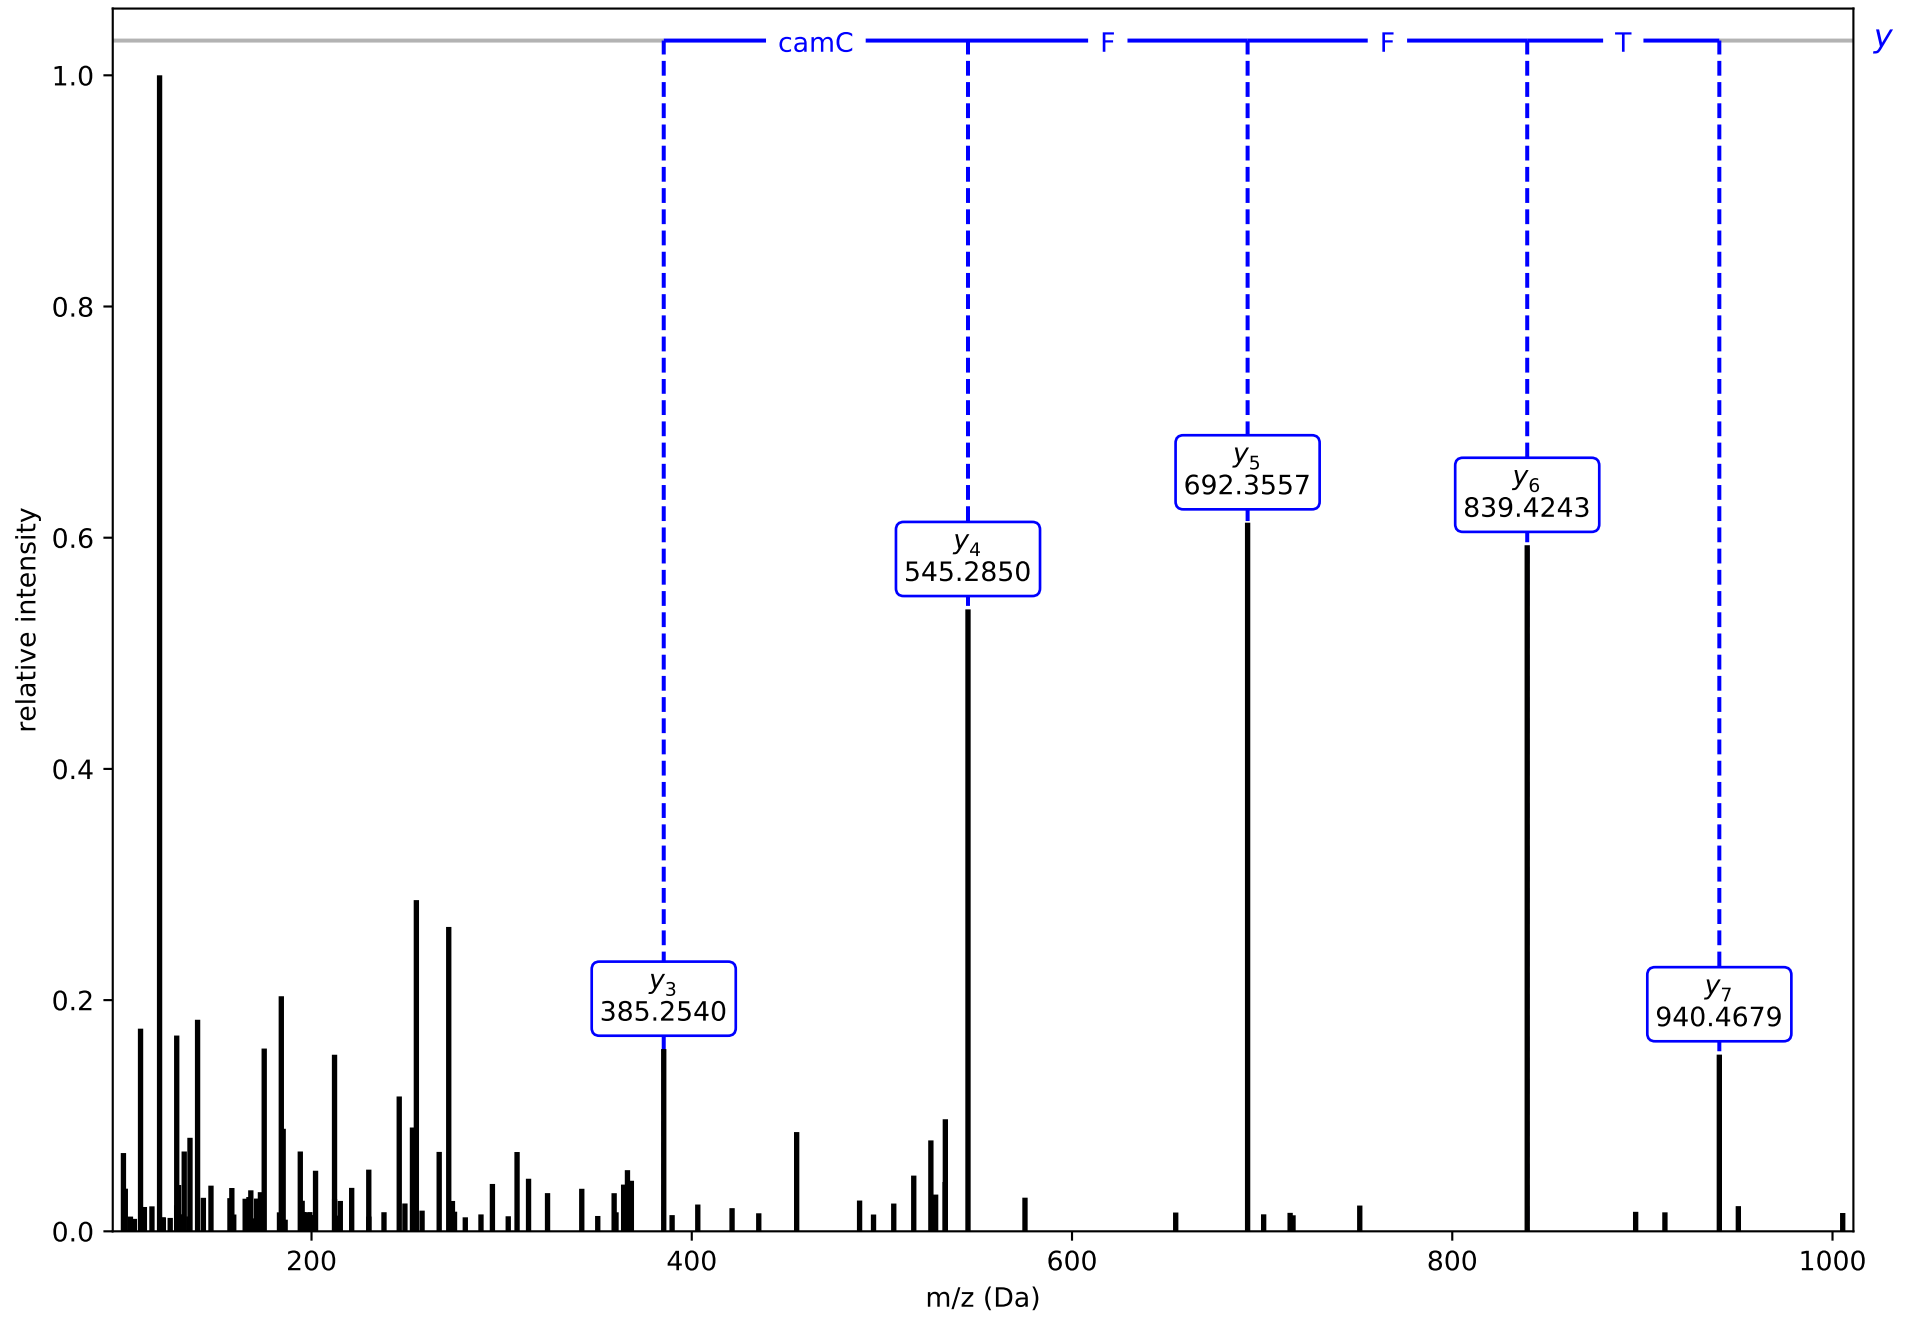

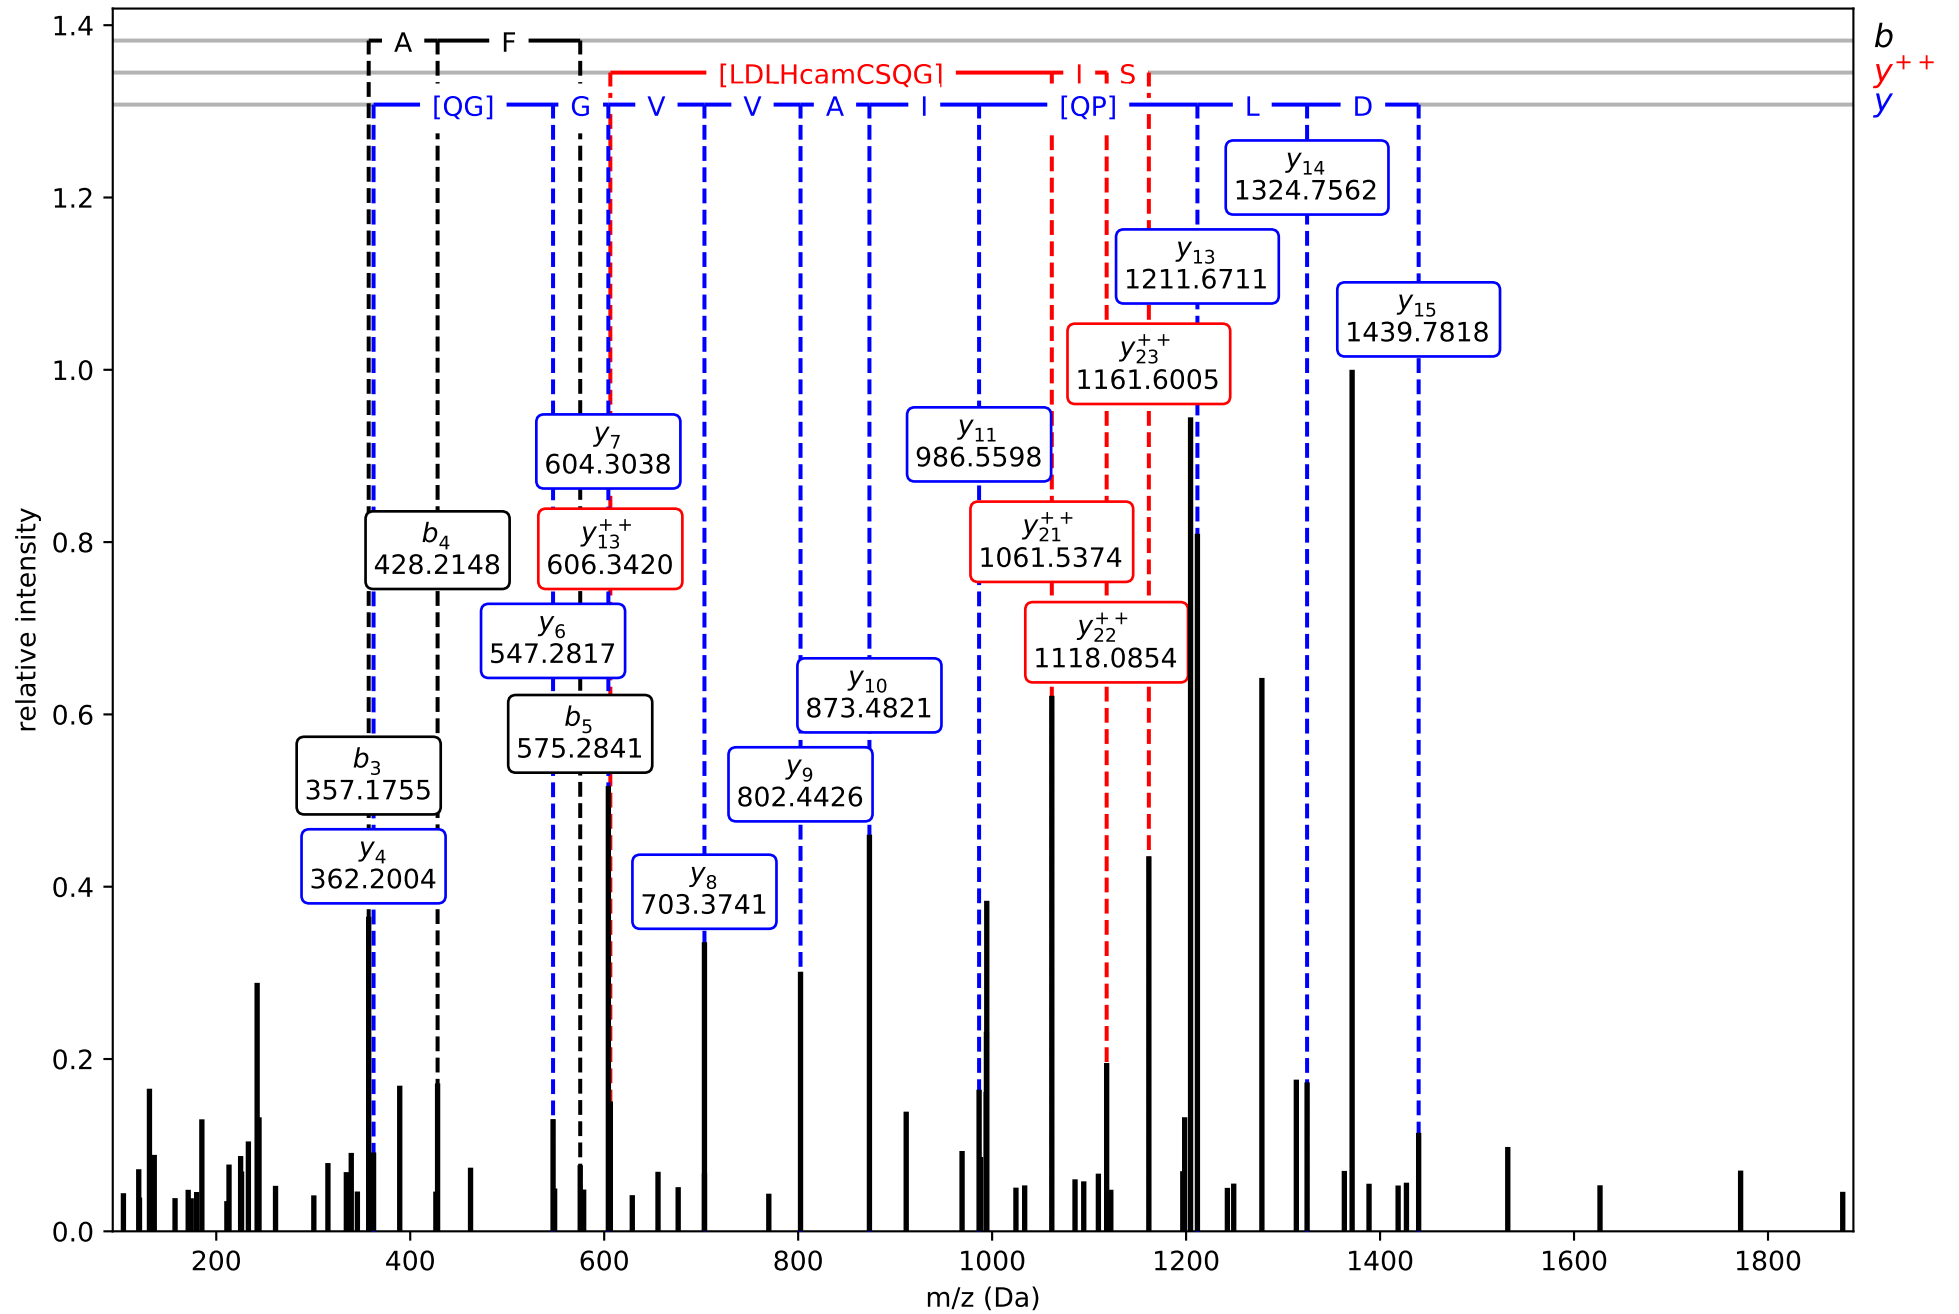

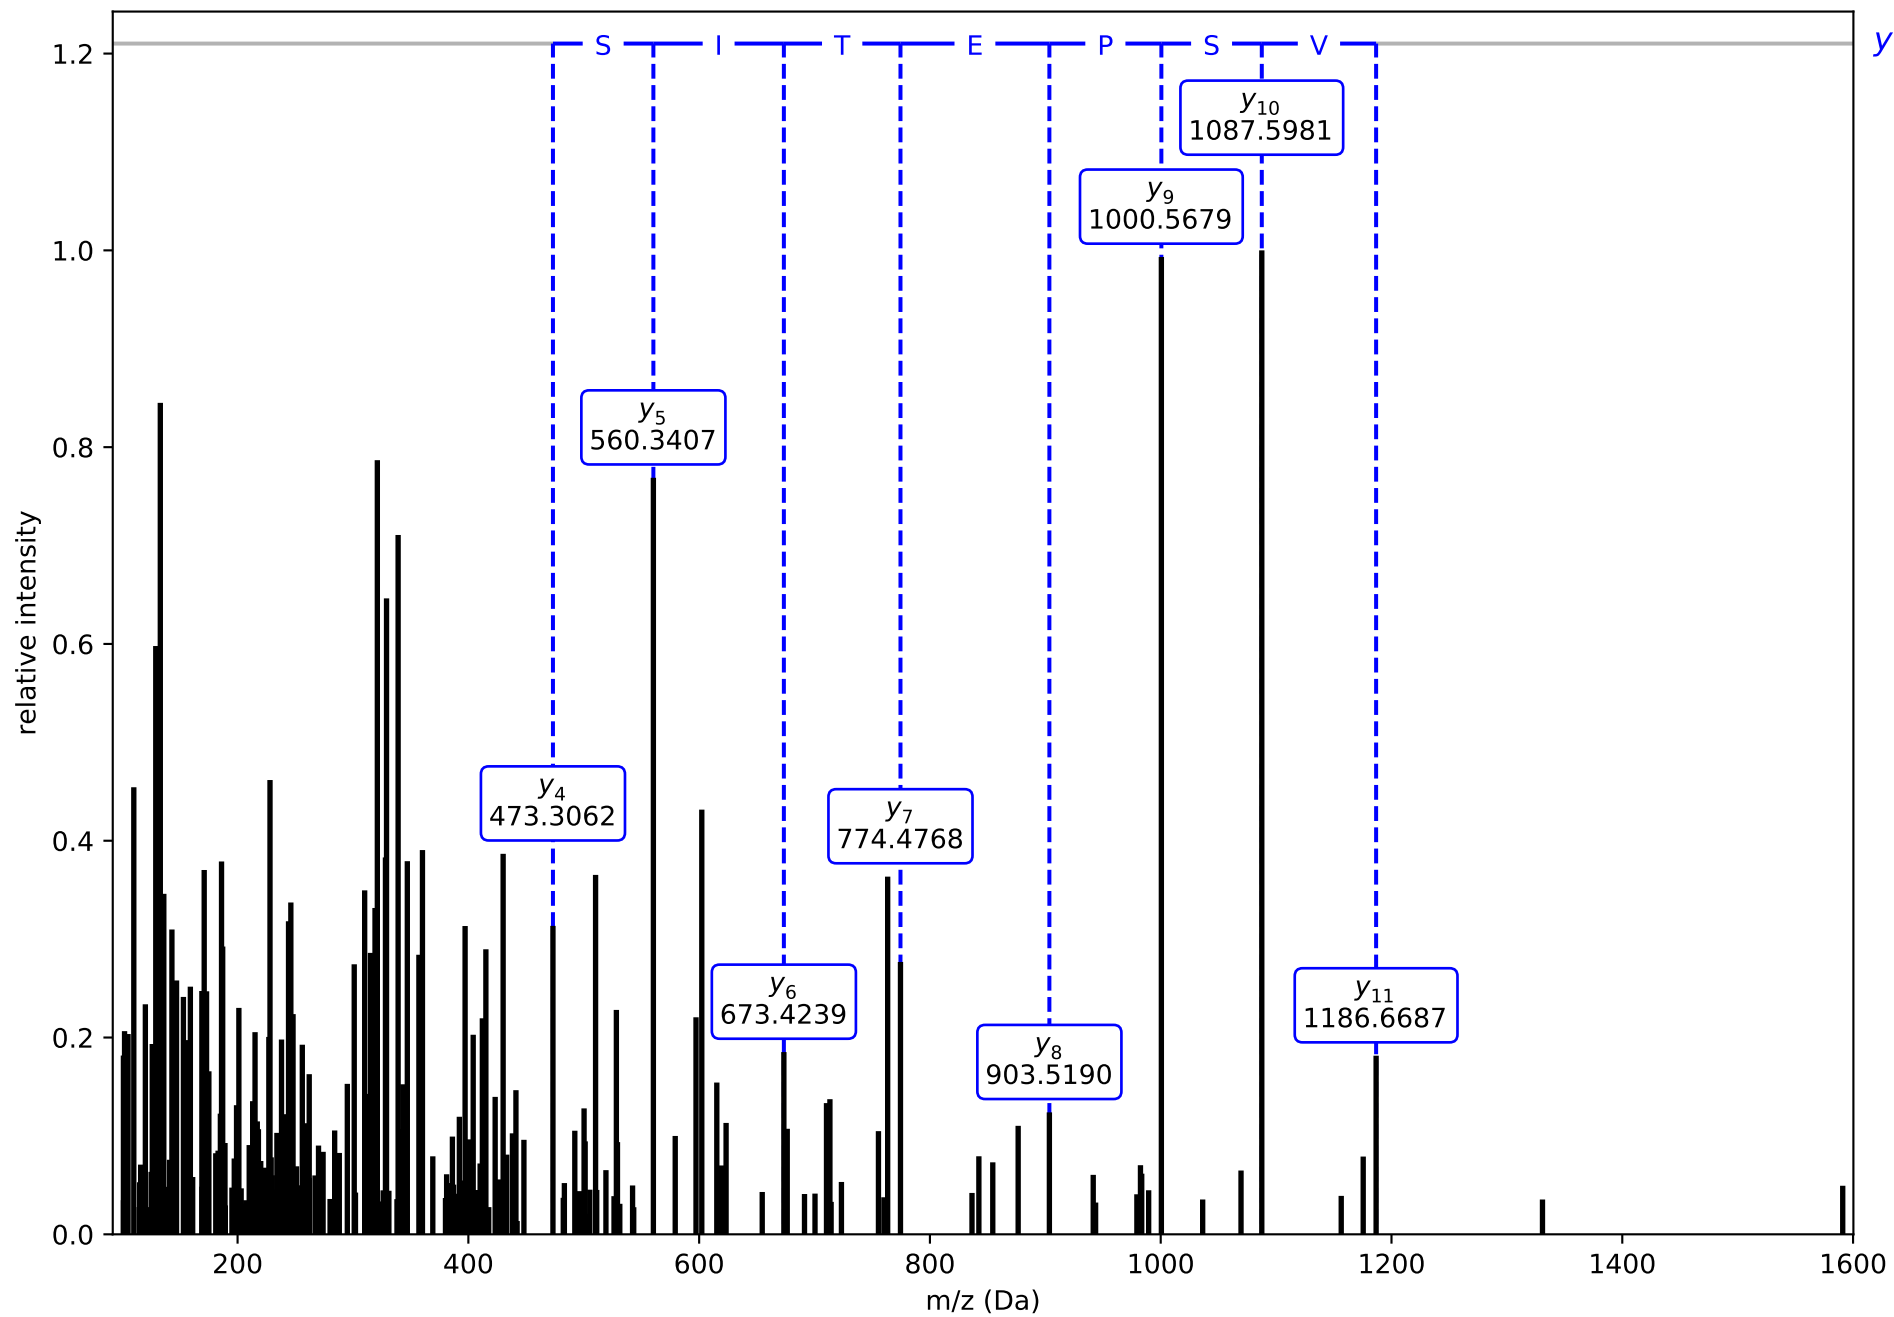

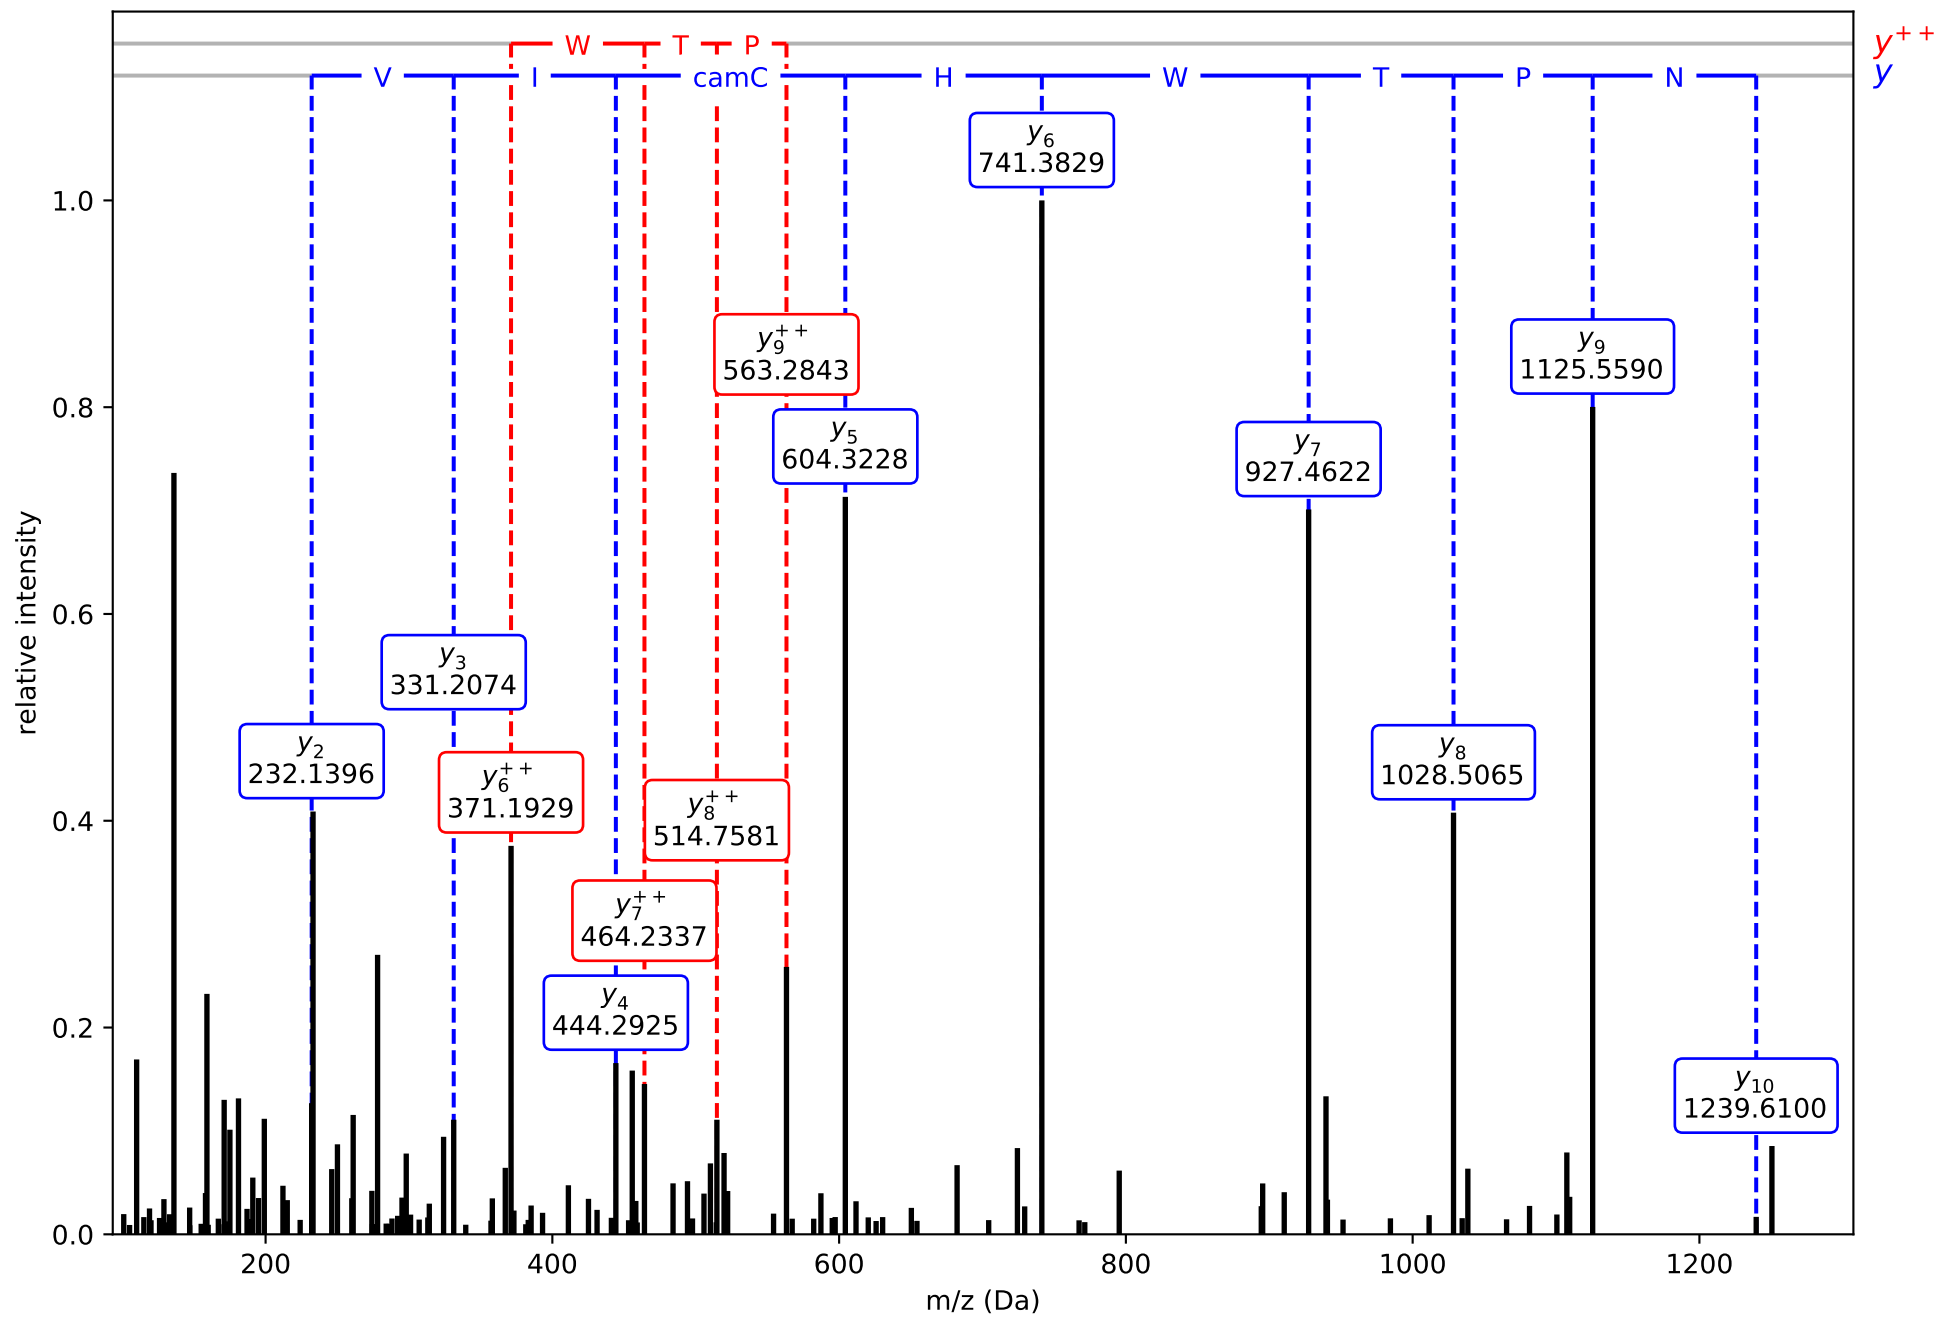



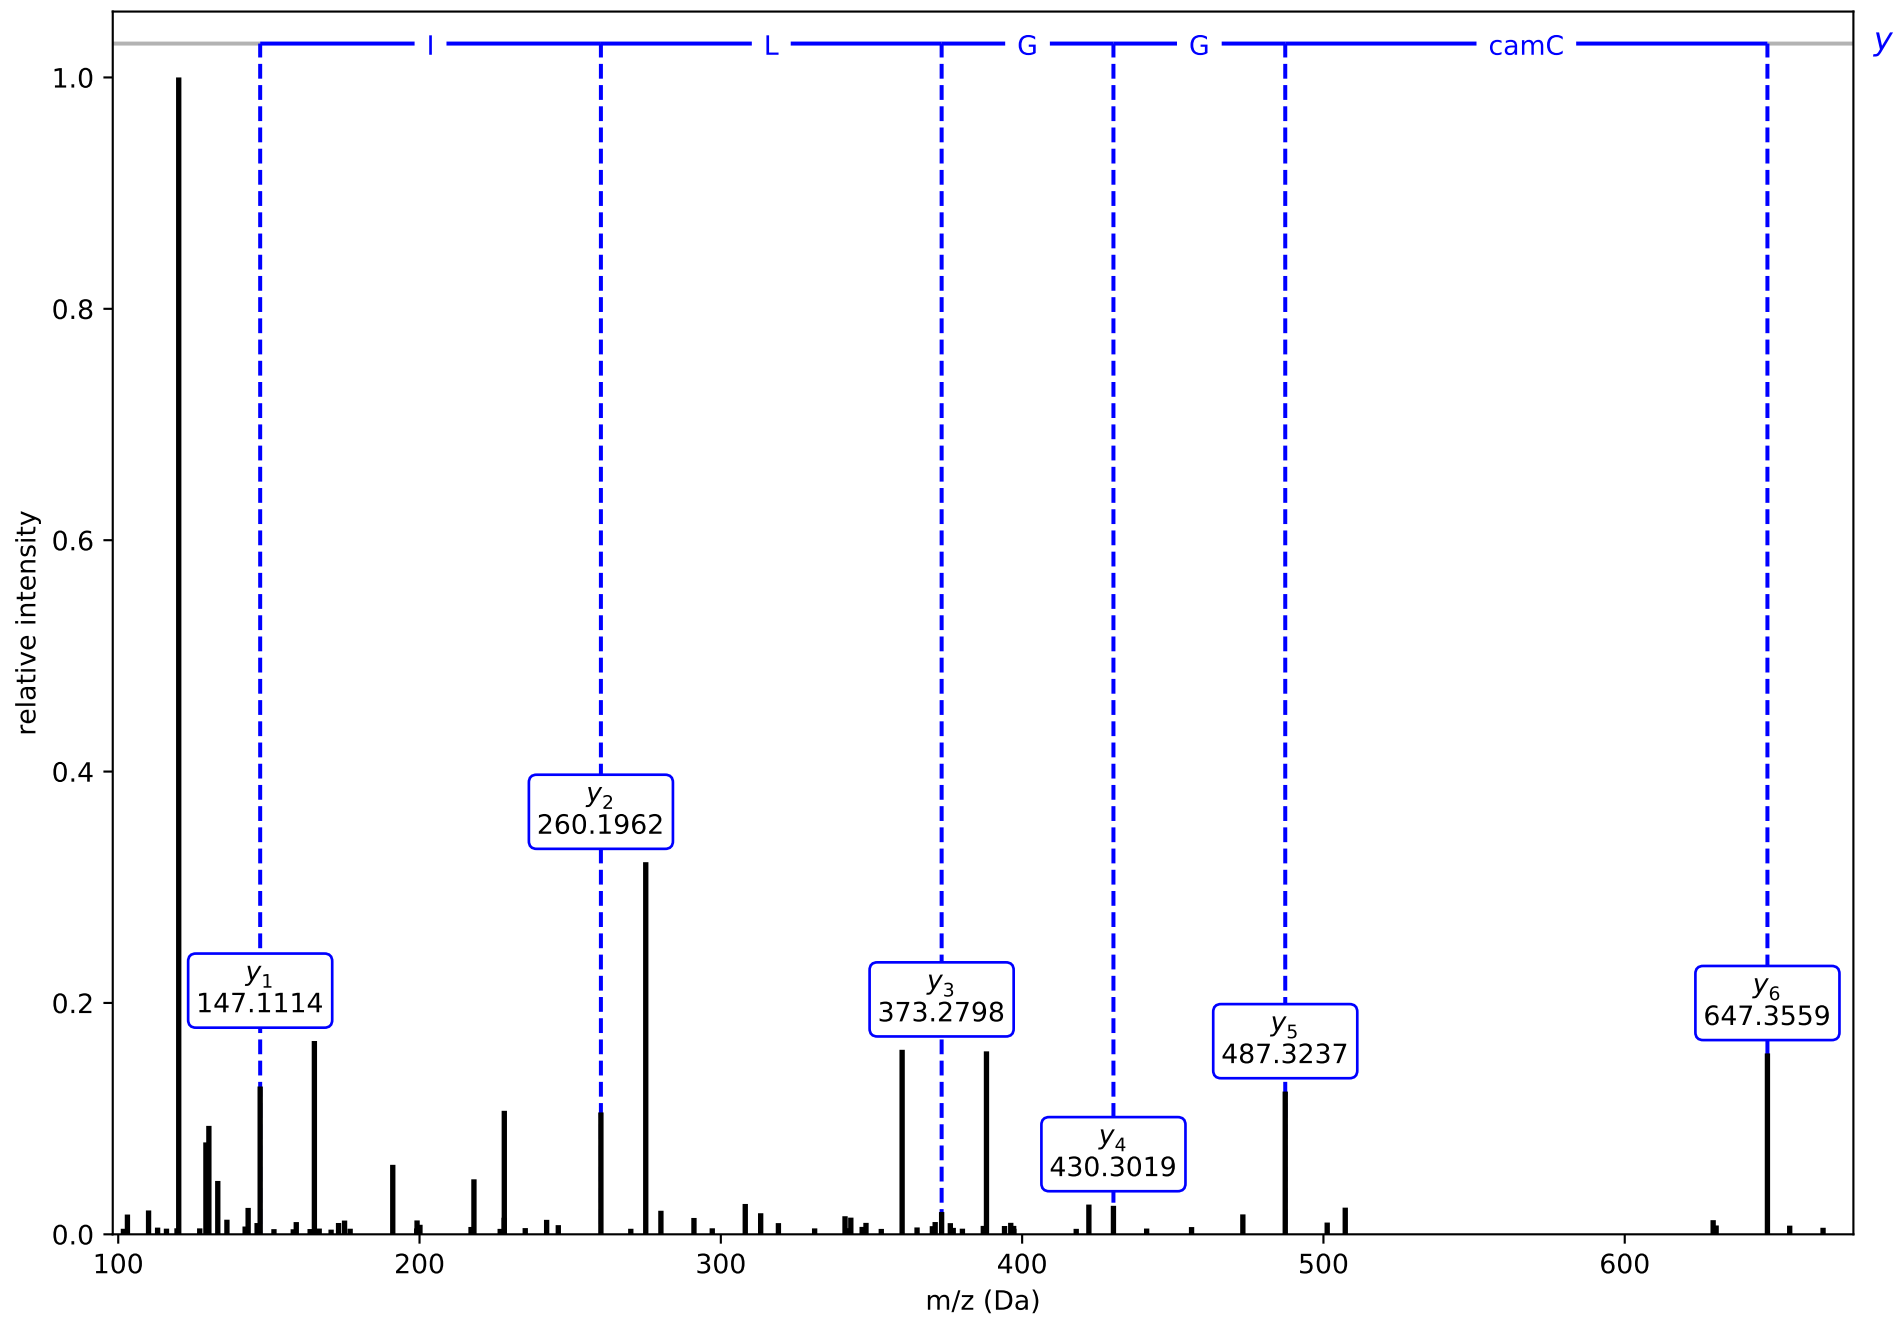

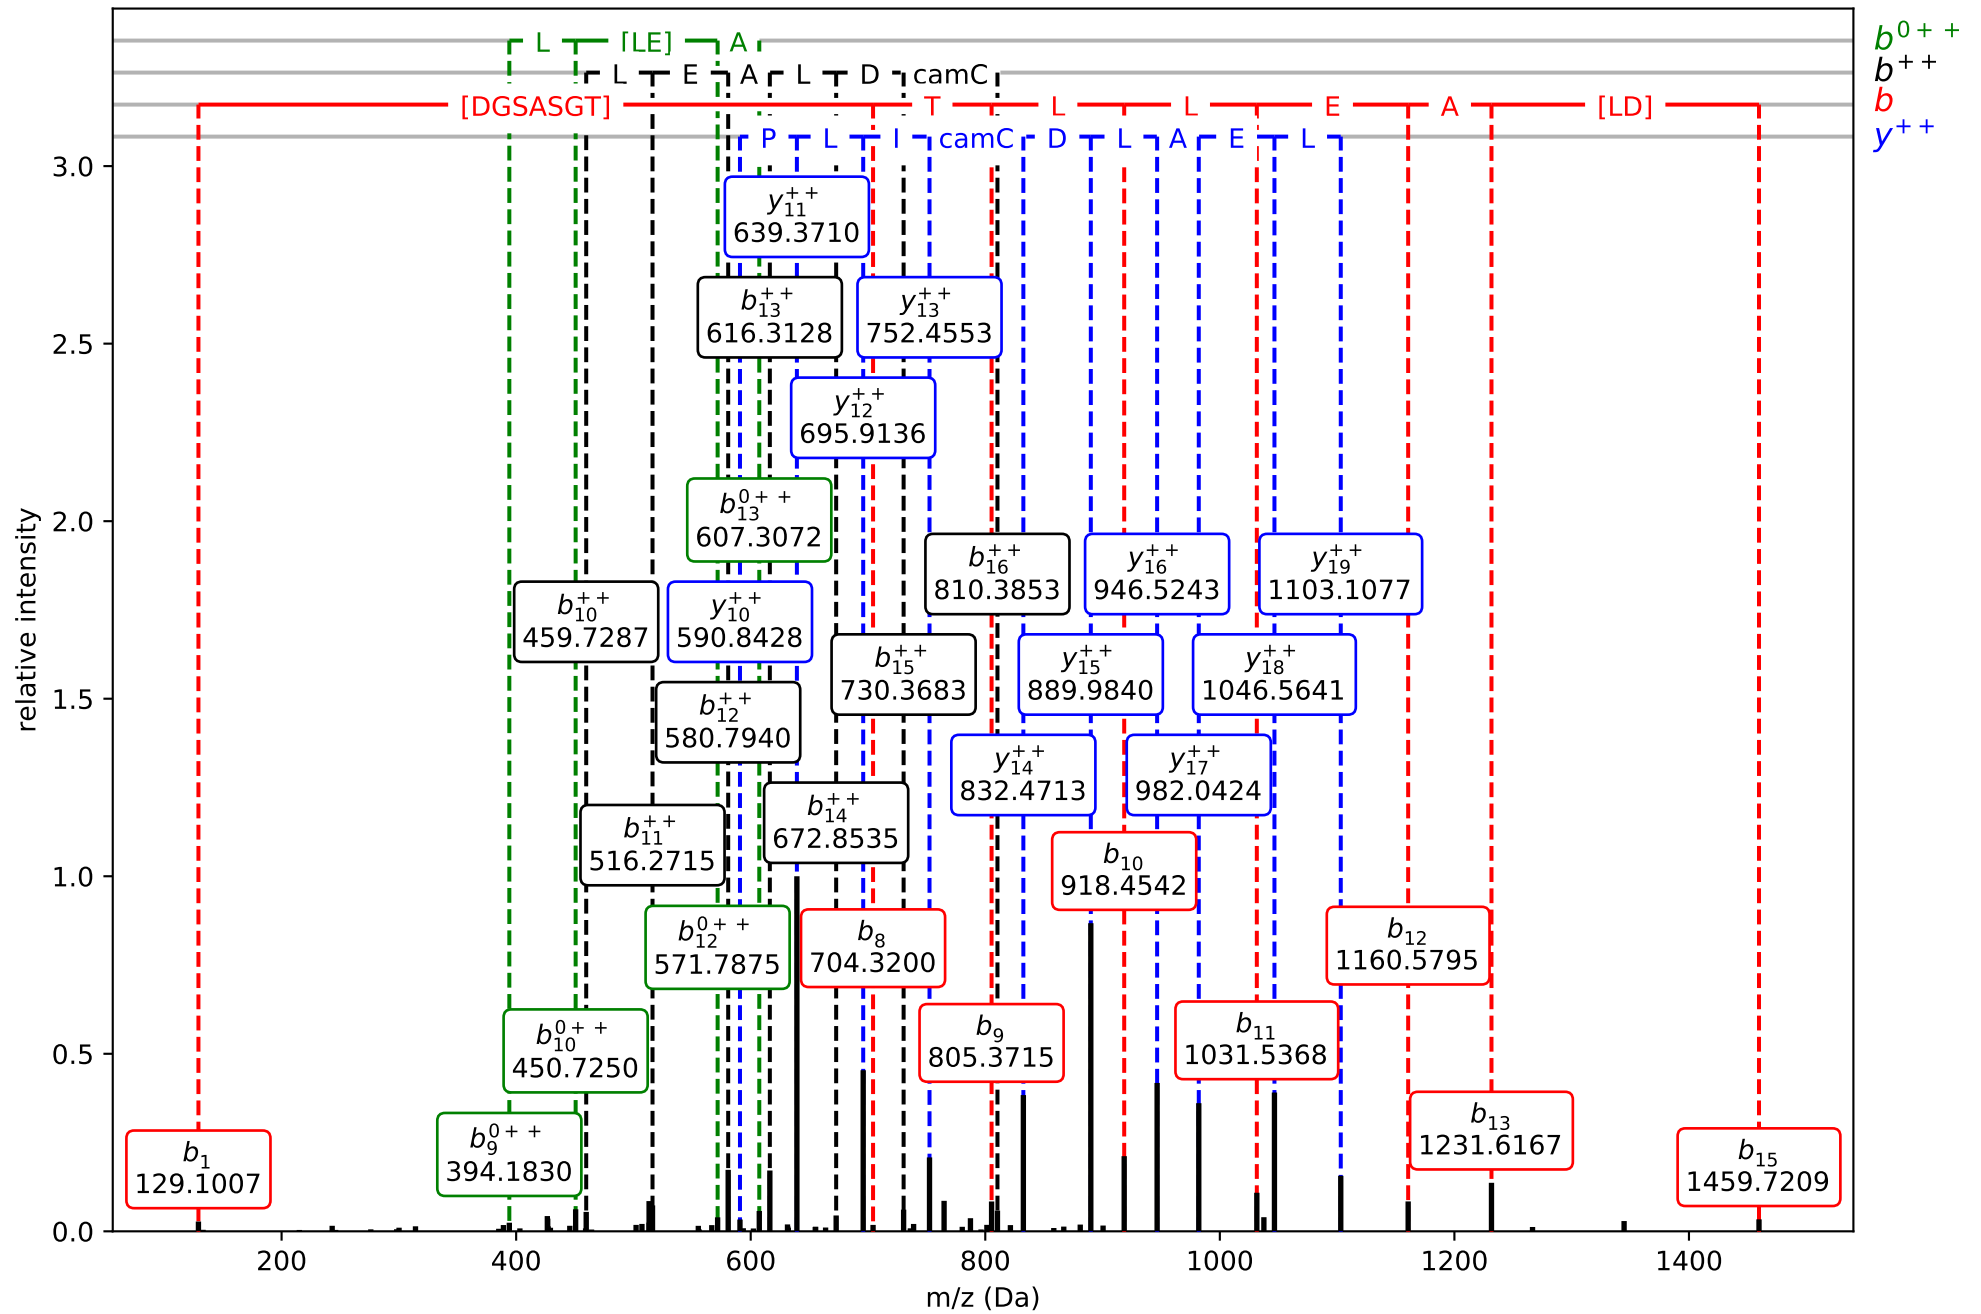

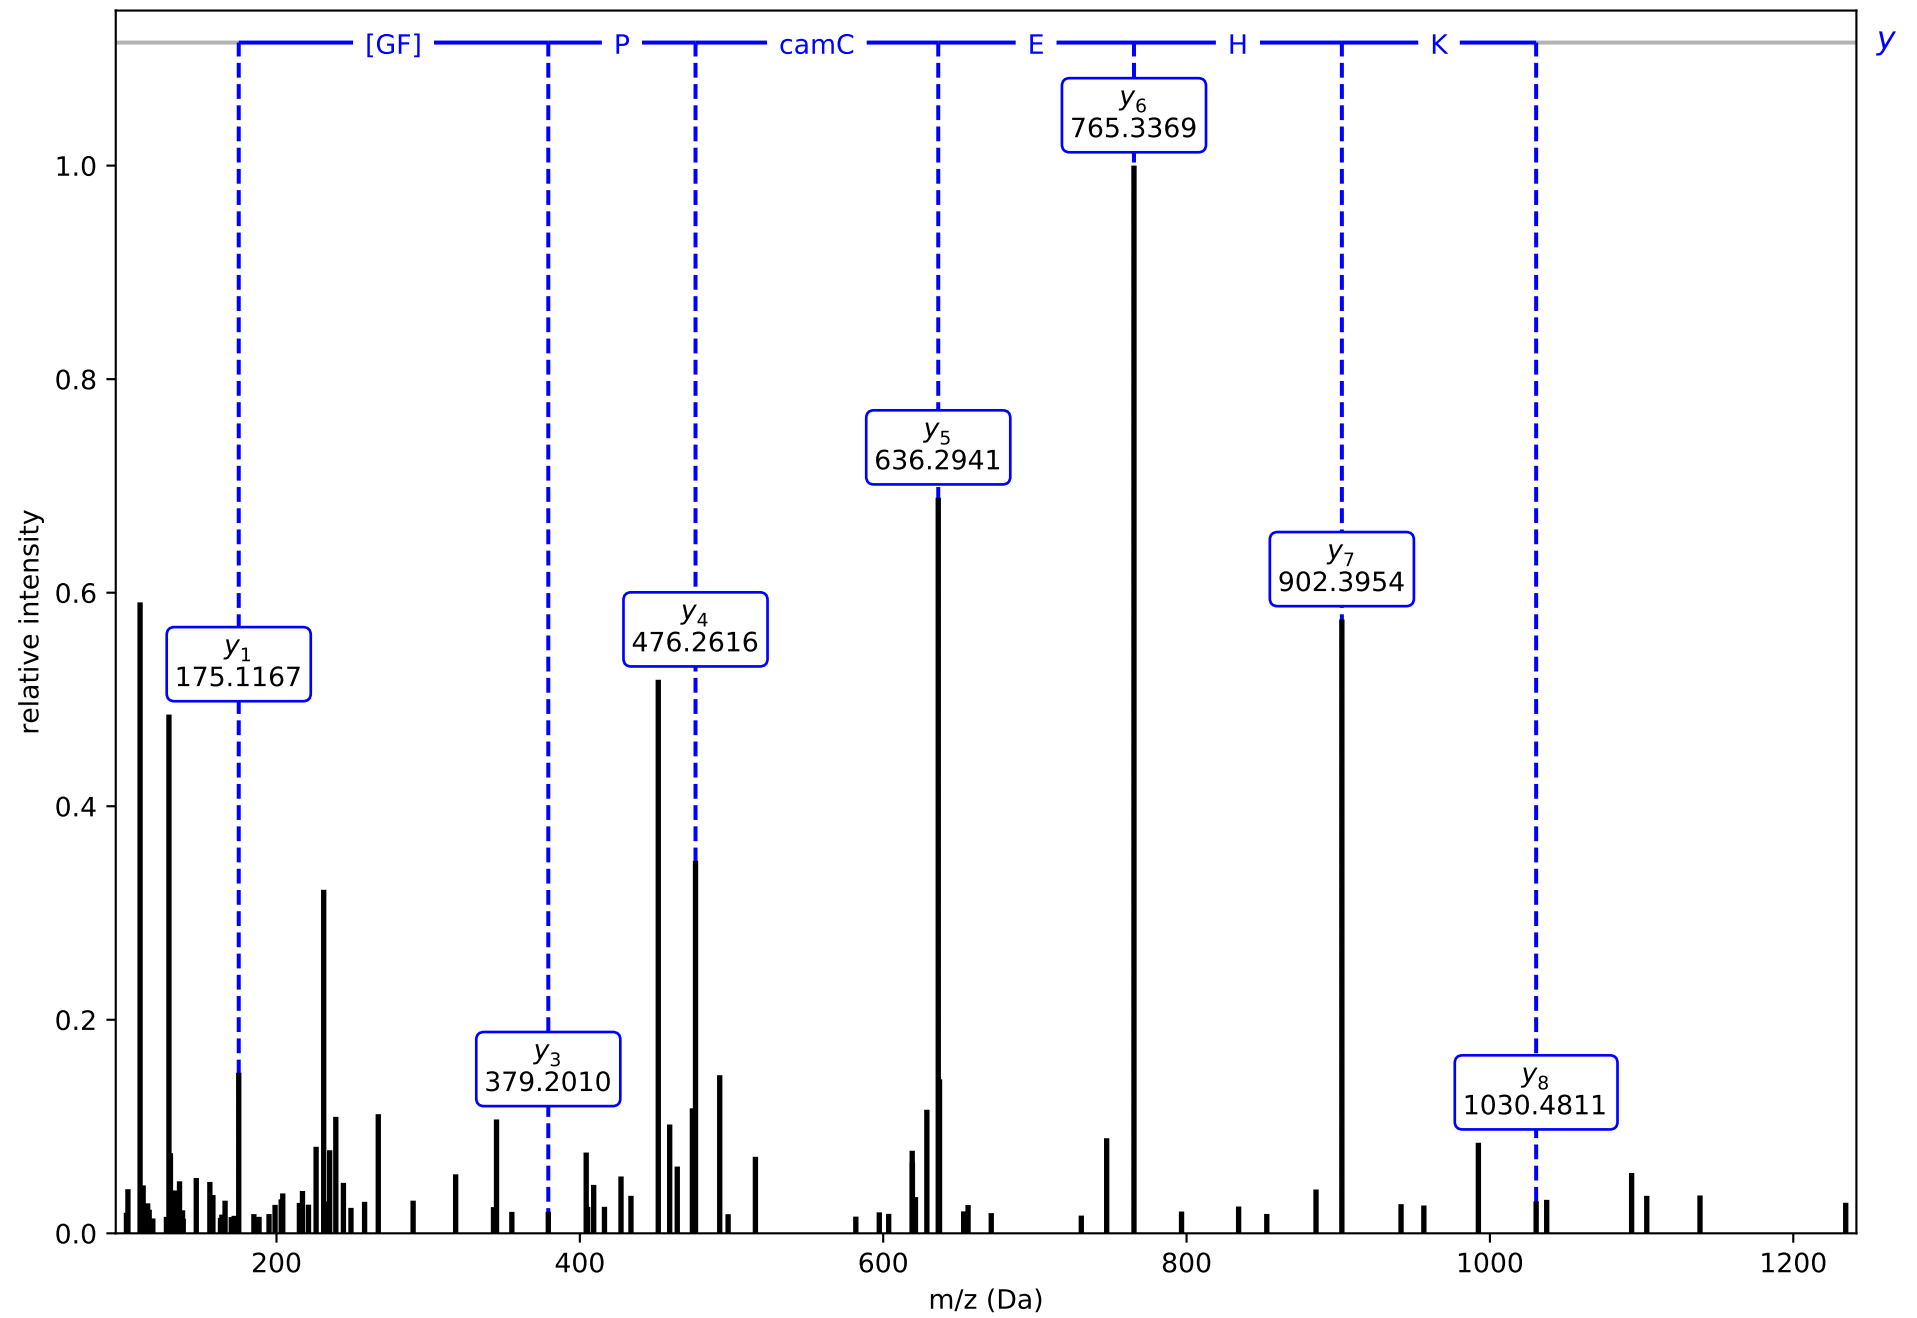

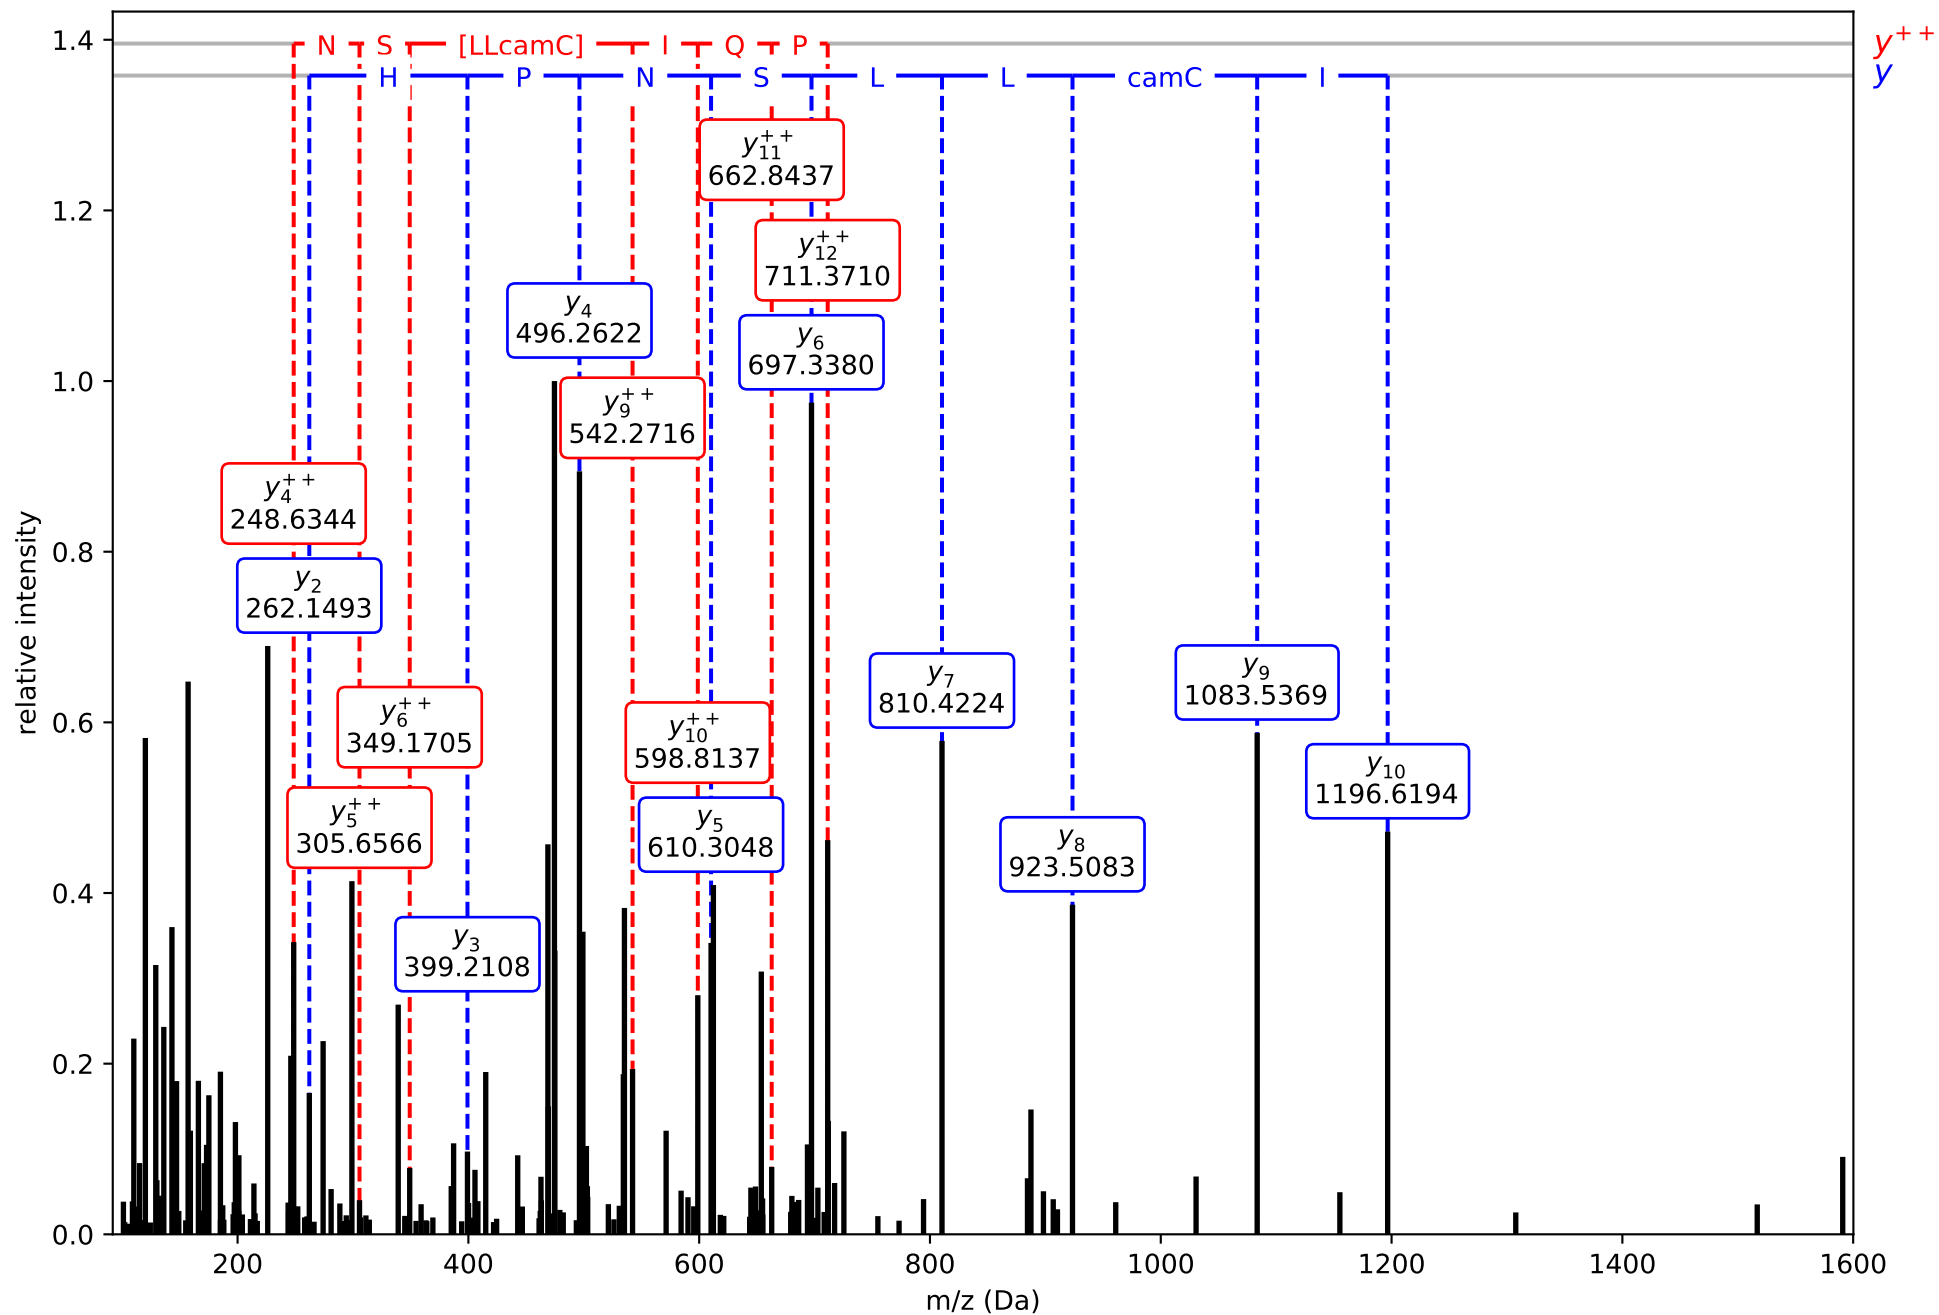

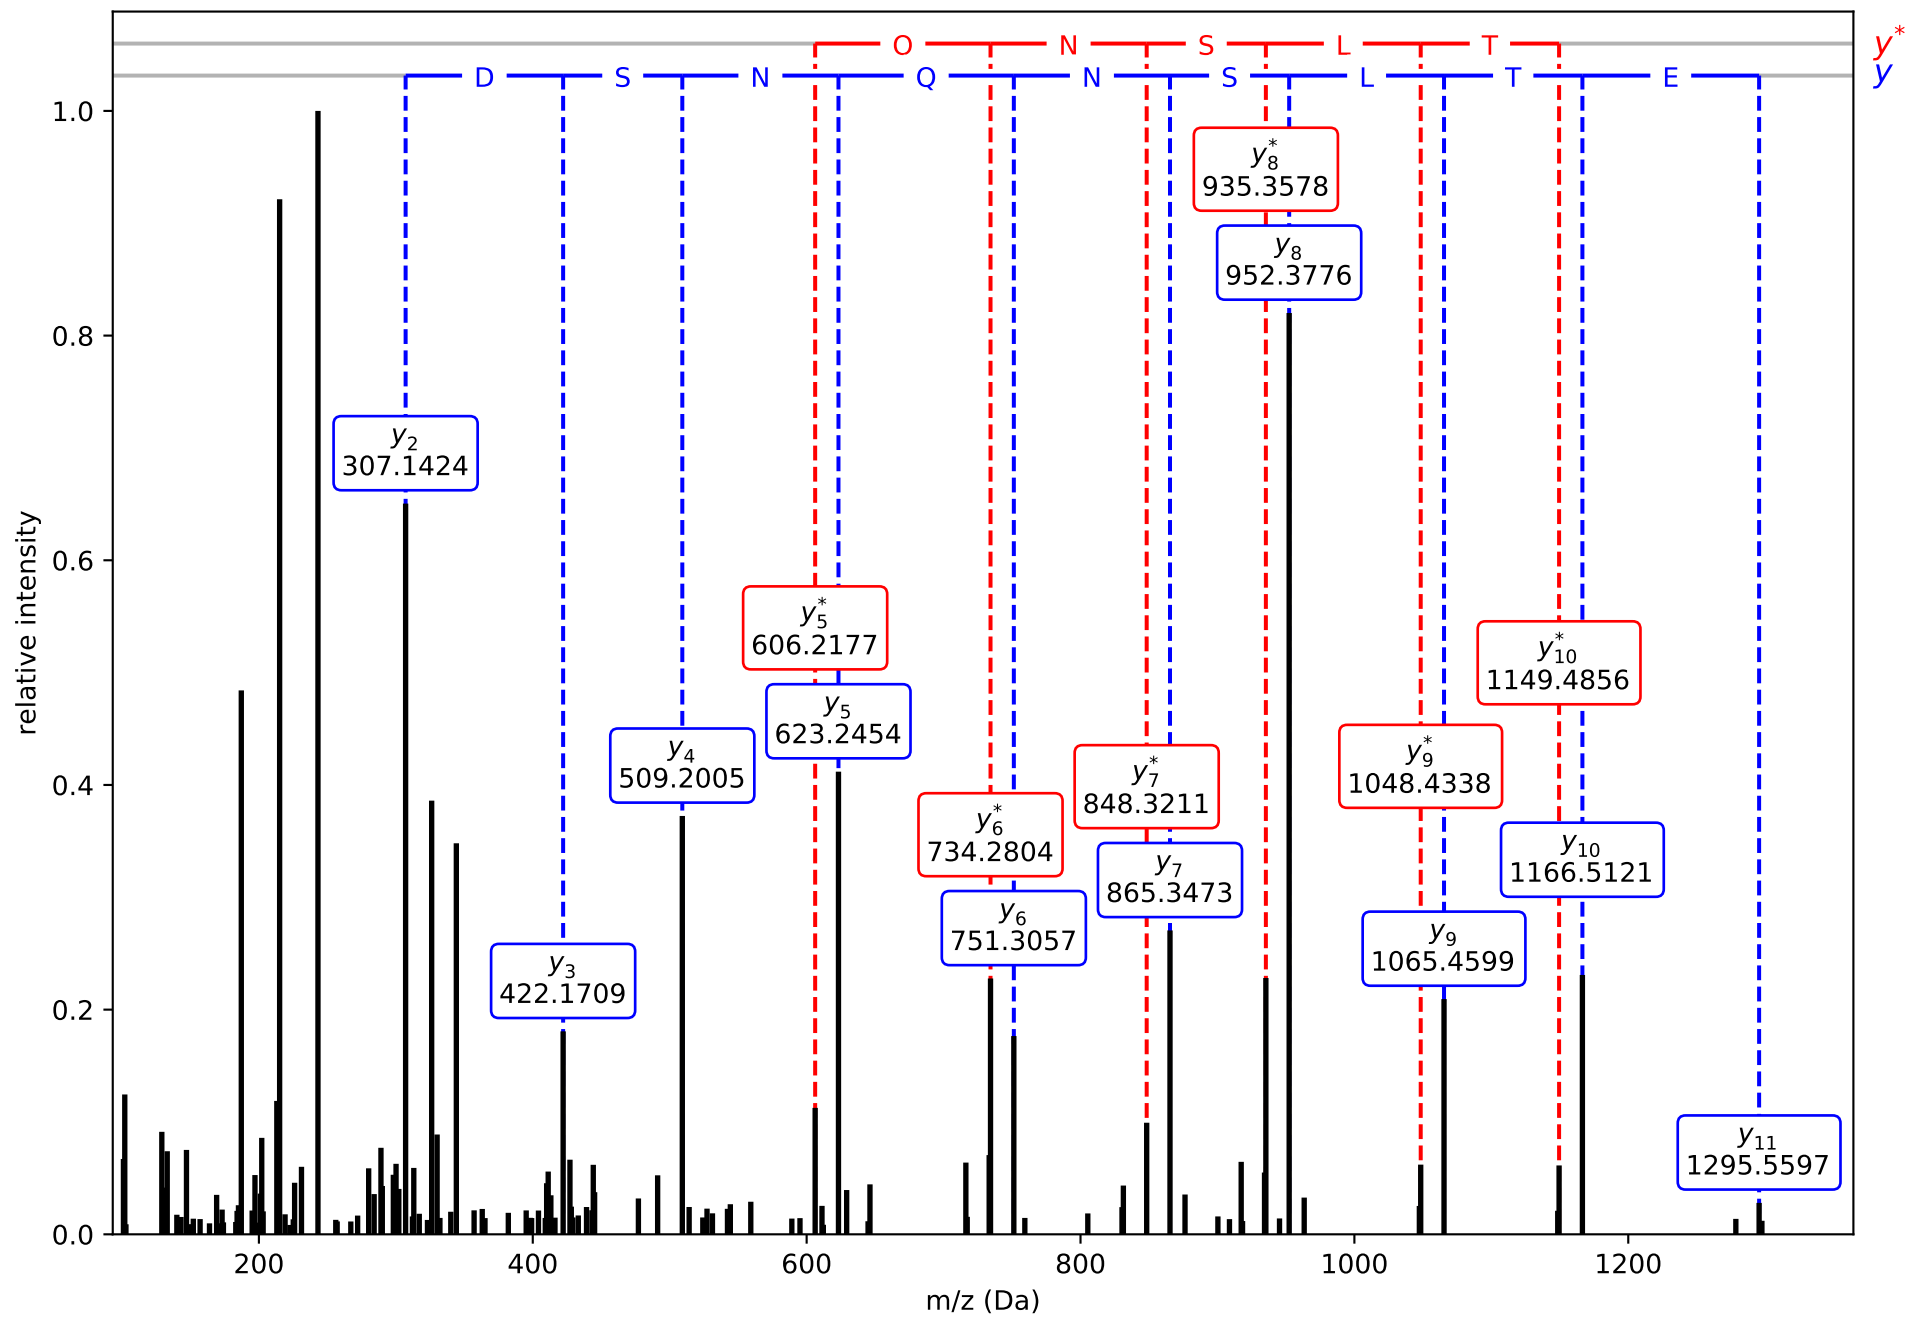

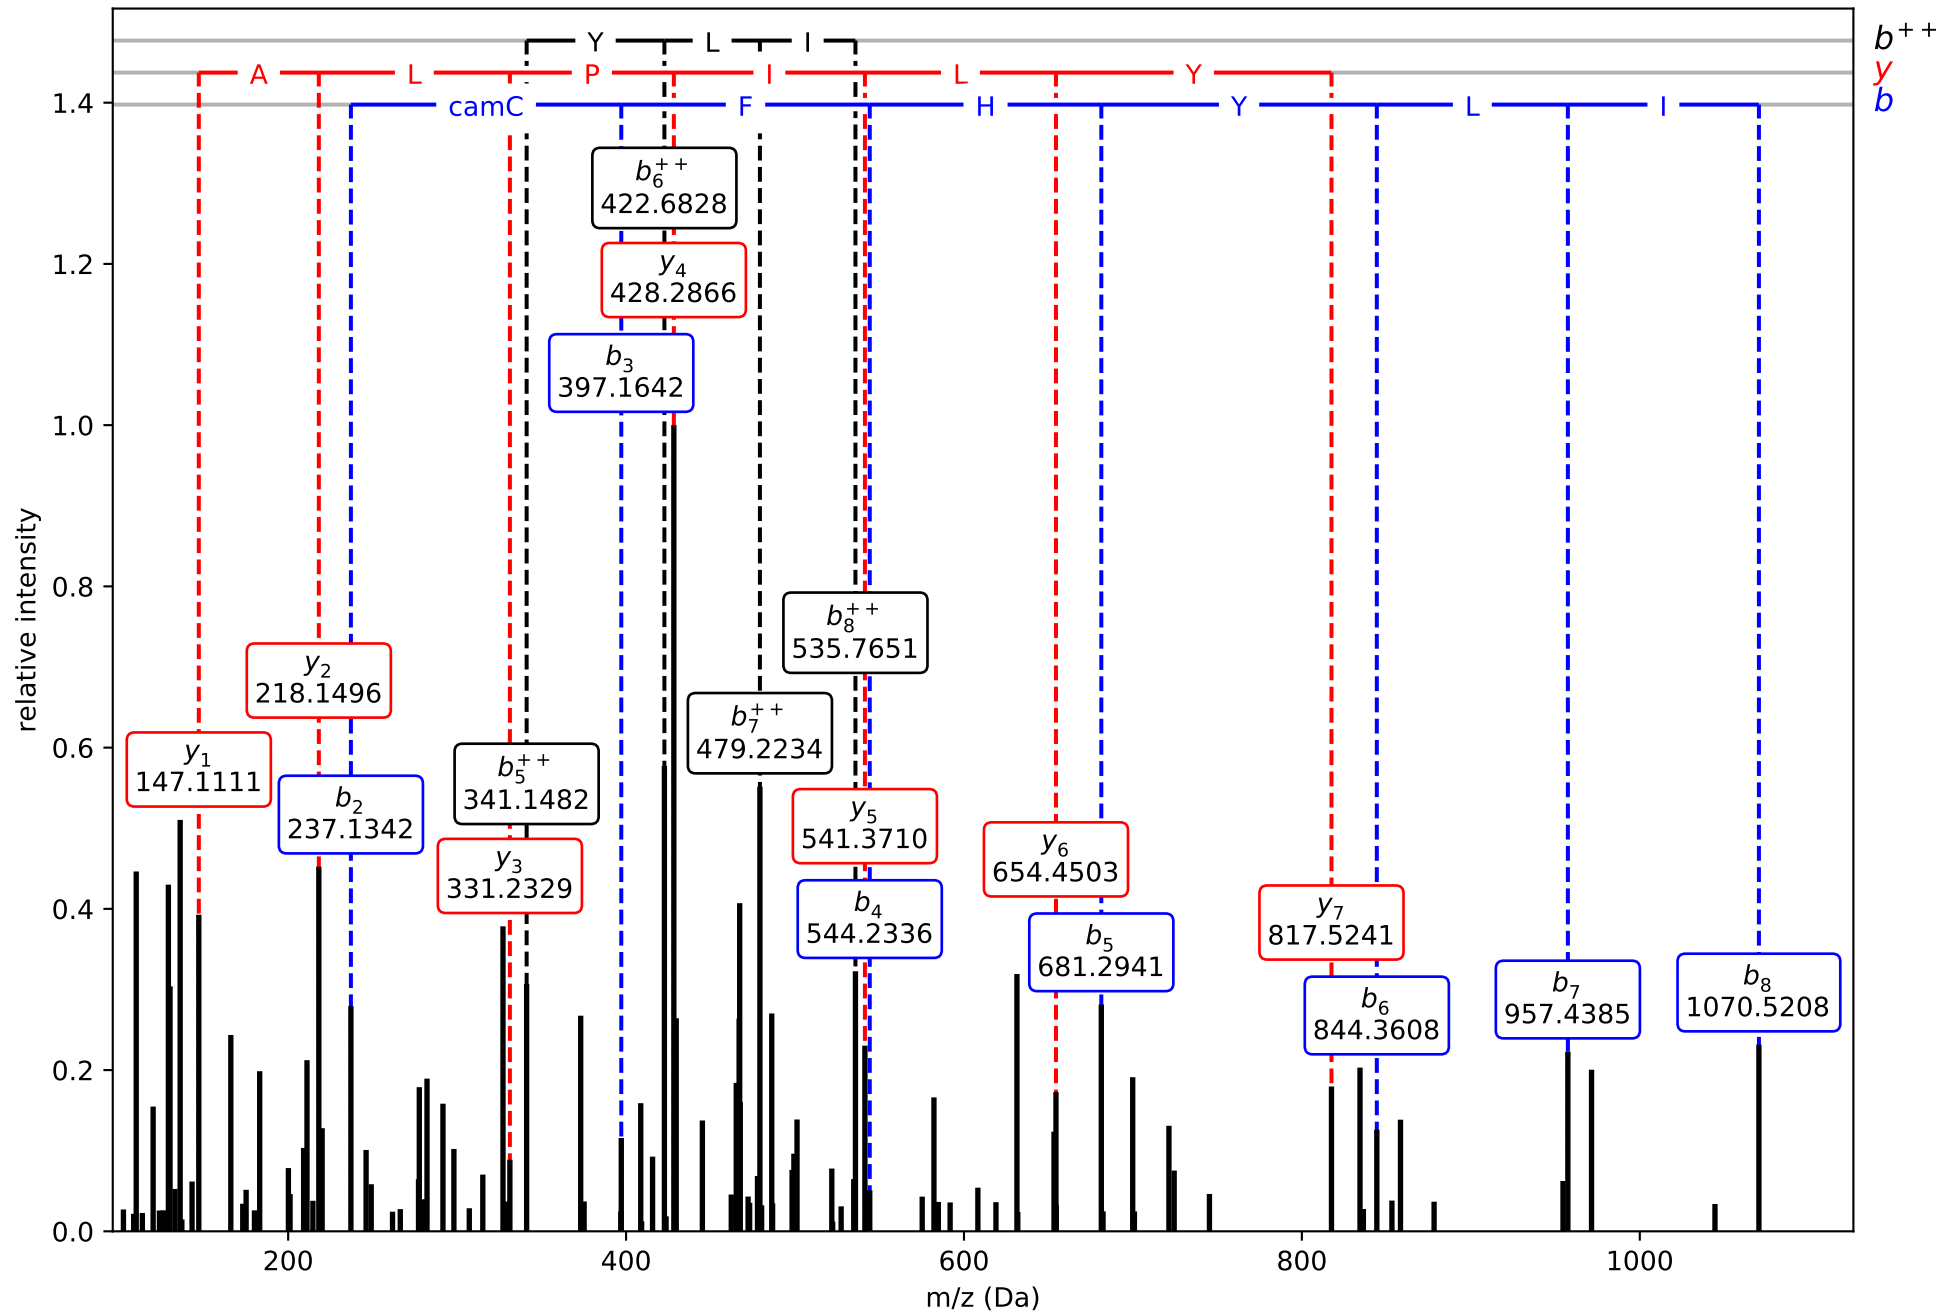

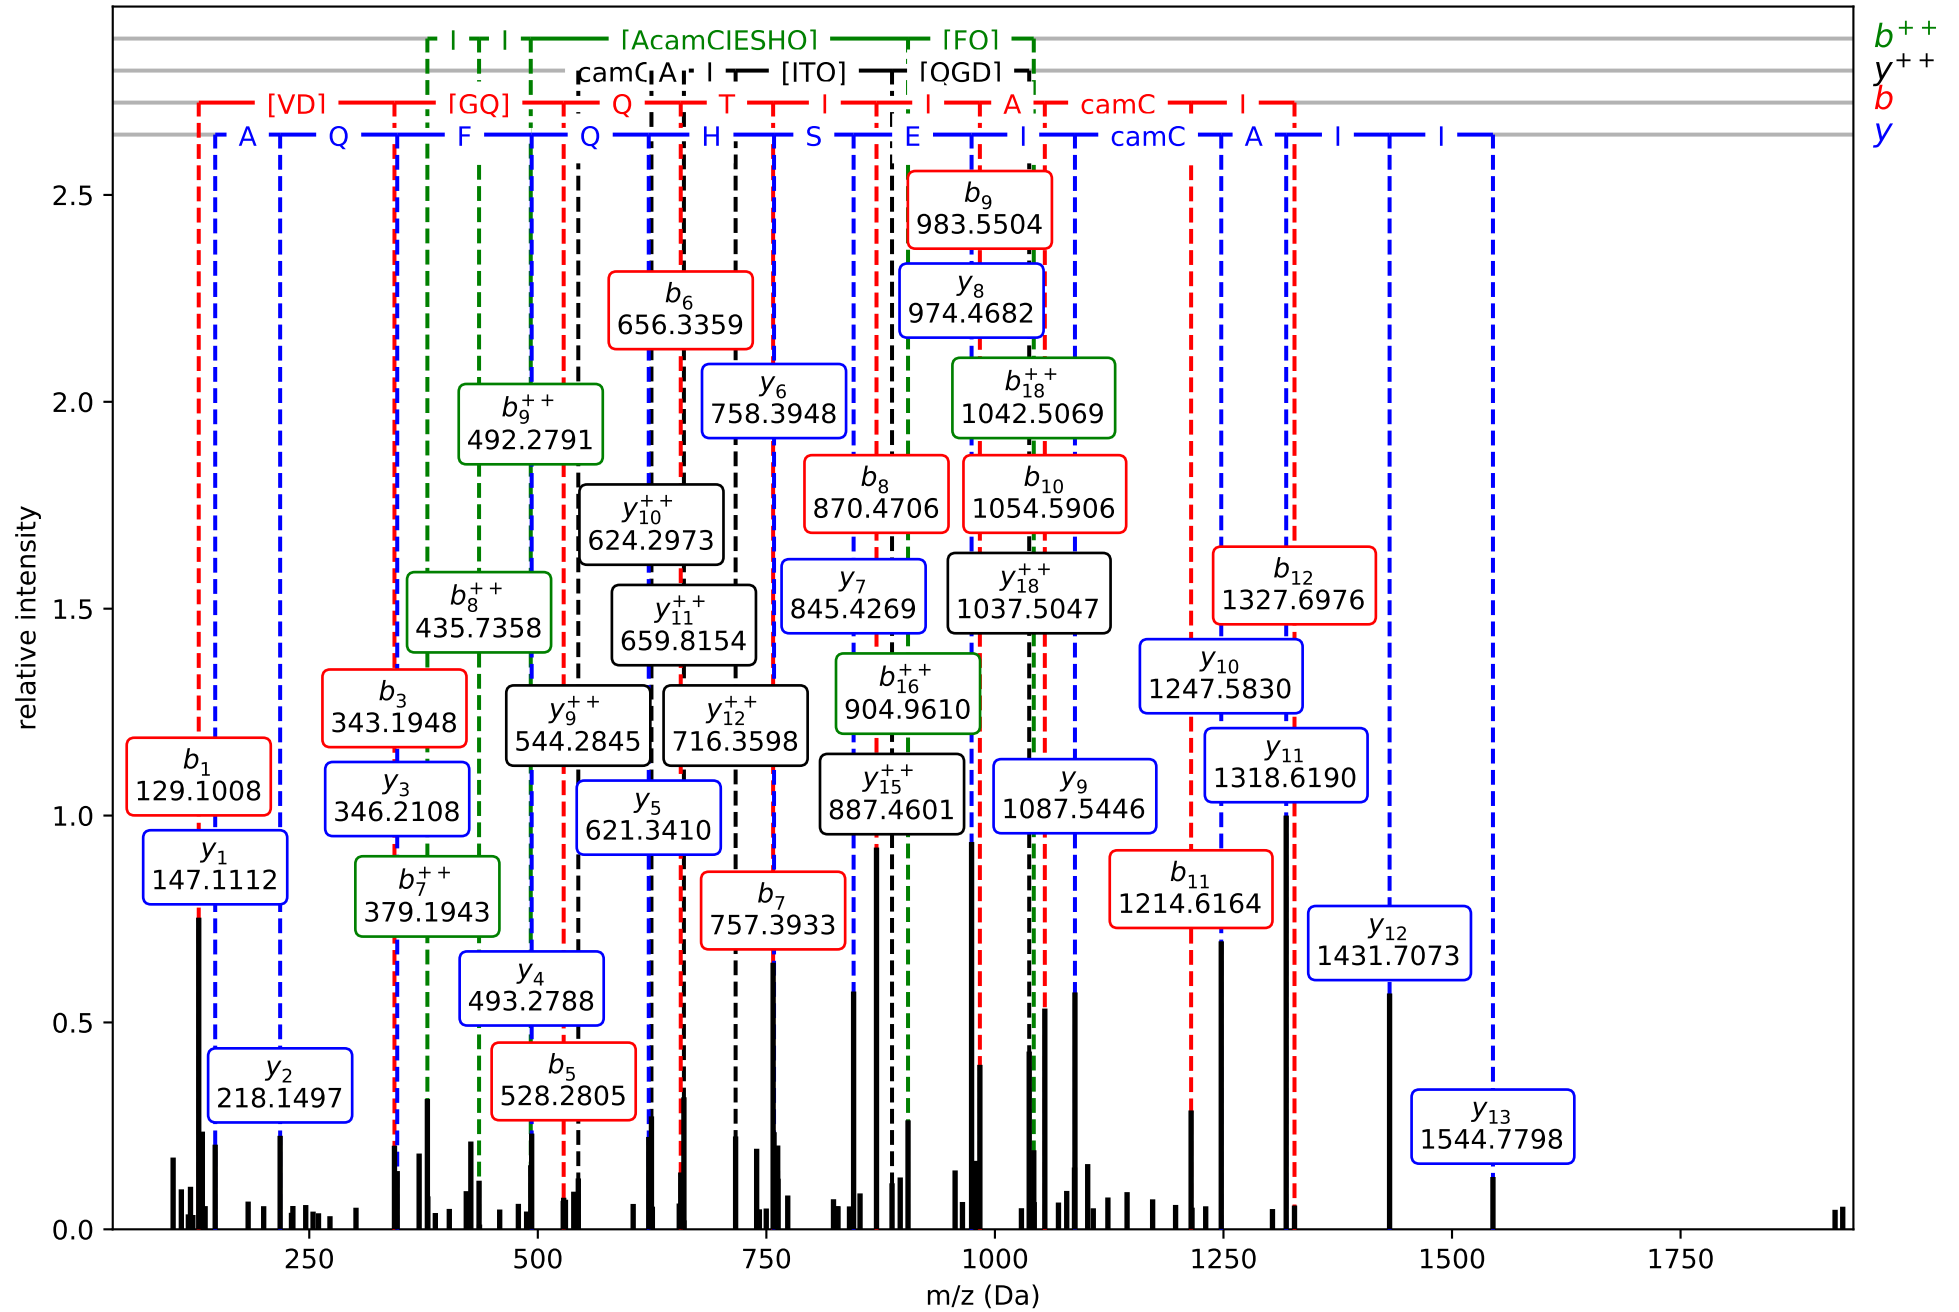

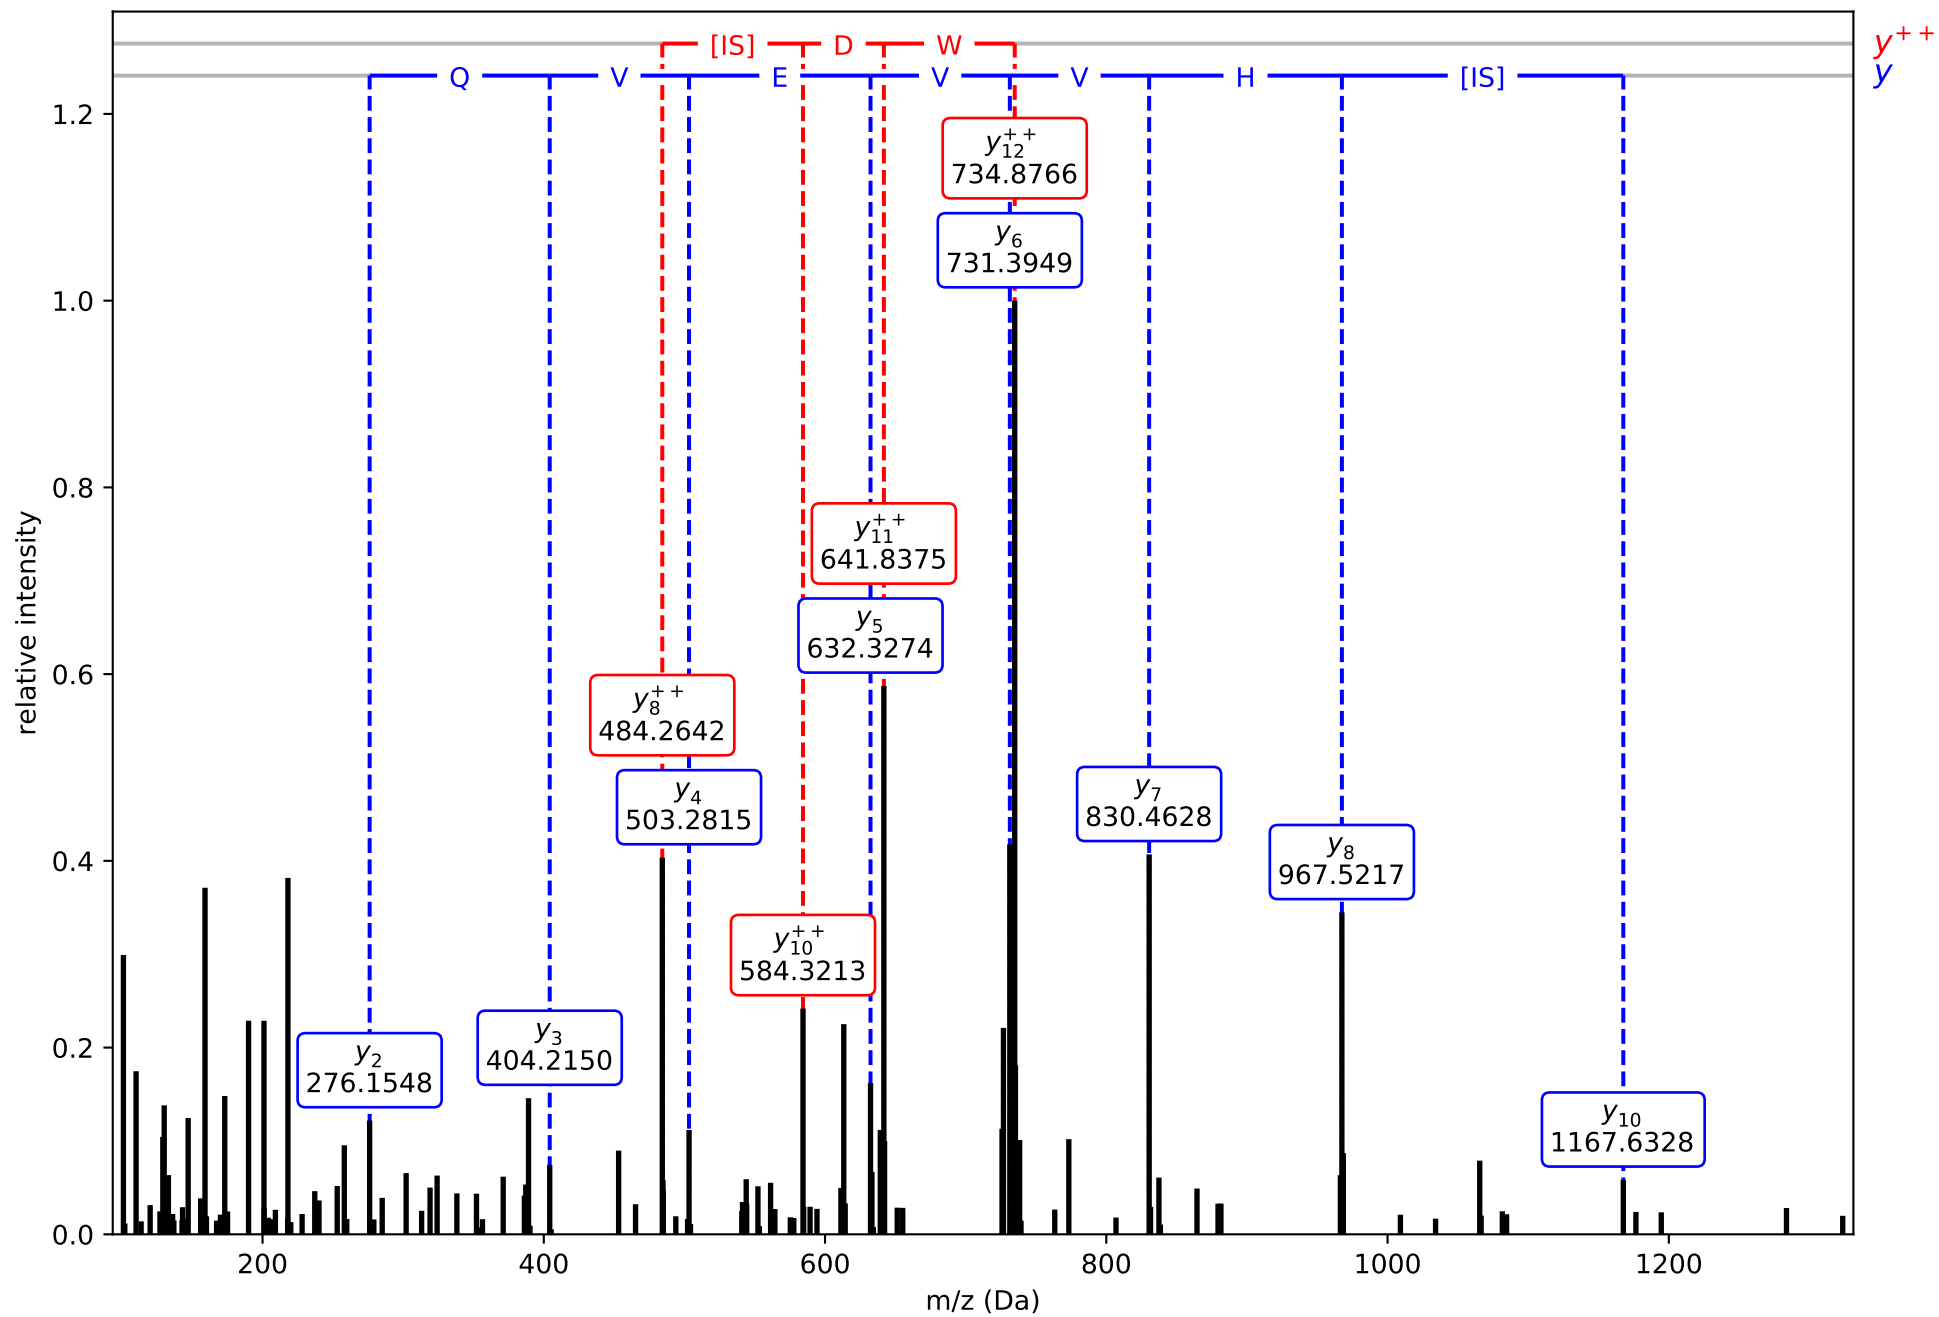



O08917 : VFVLPcamCIQQIQR

parent: 750.9219, 2+

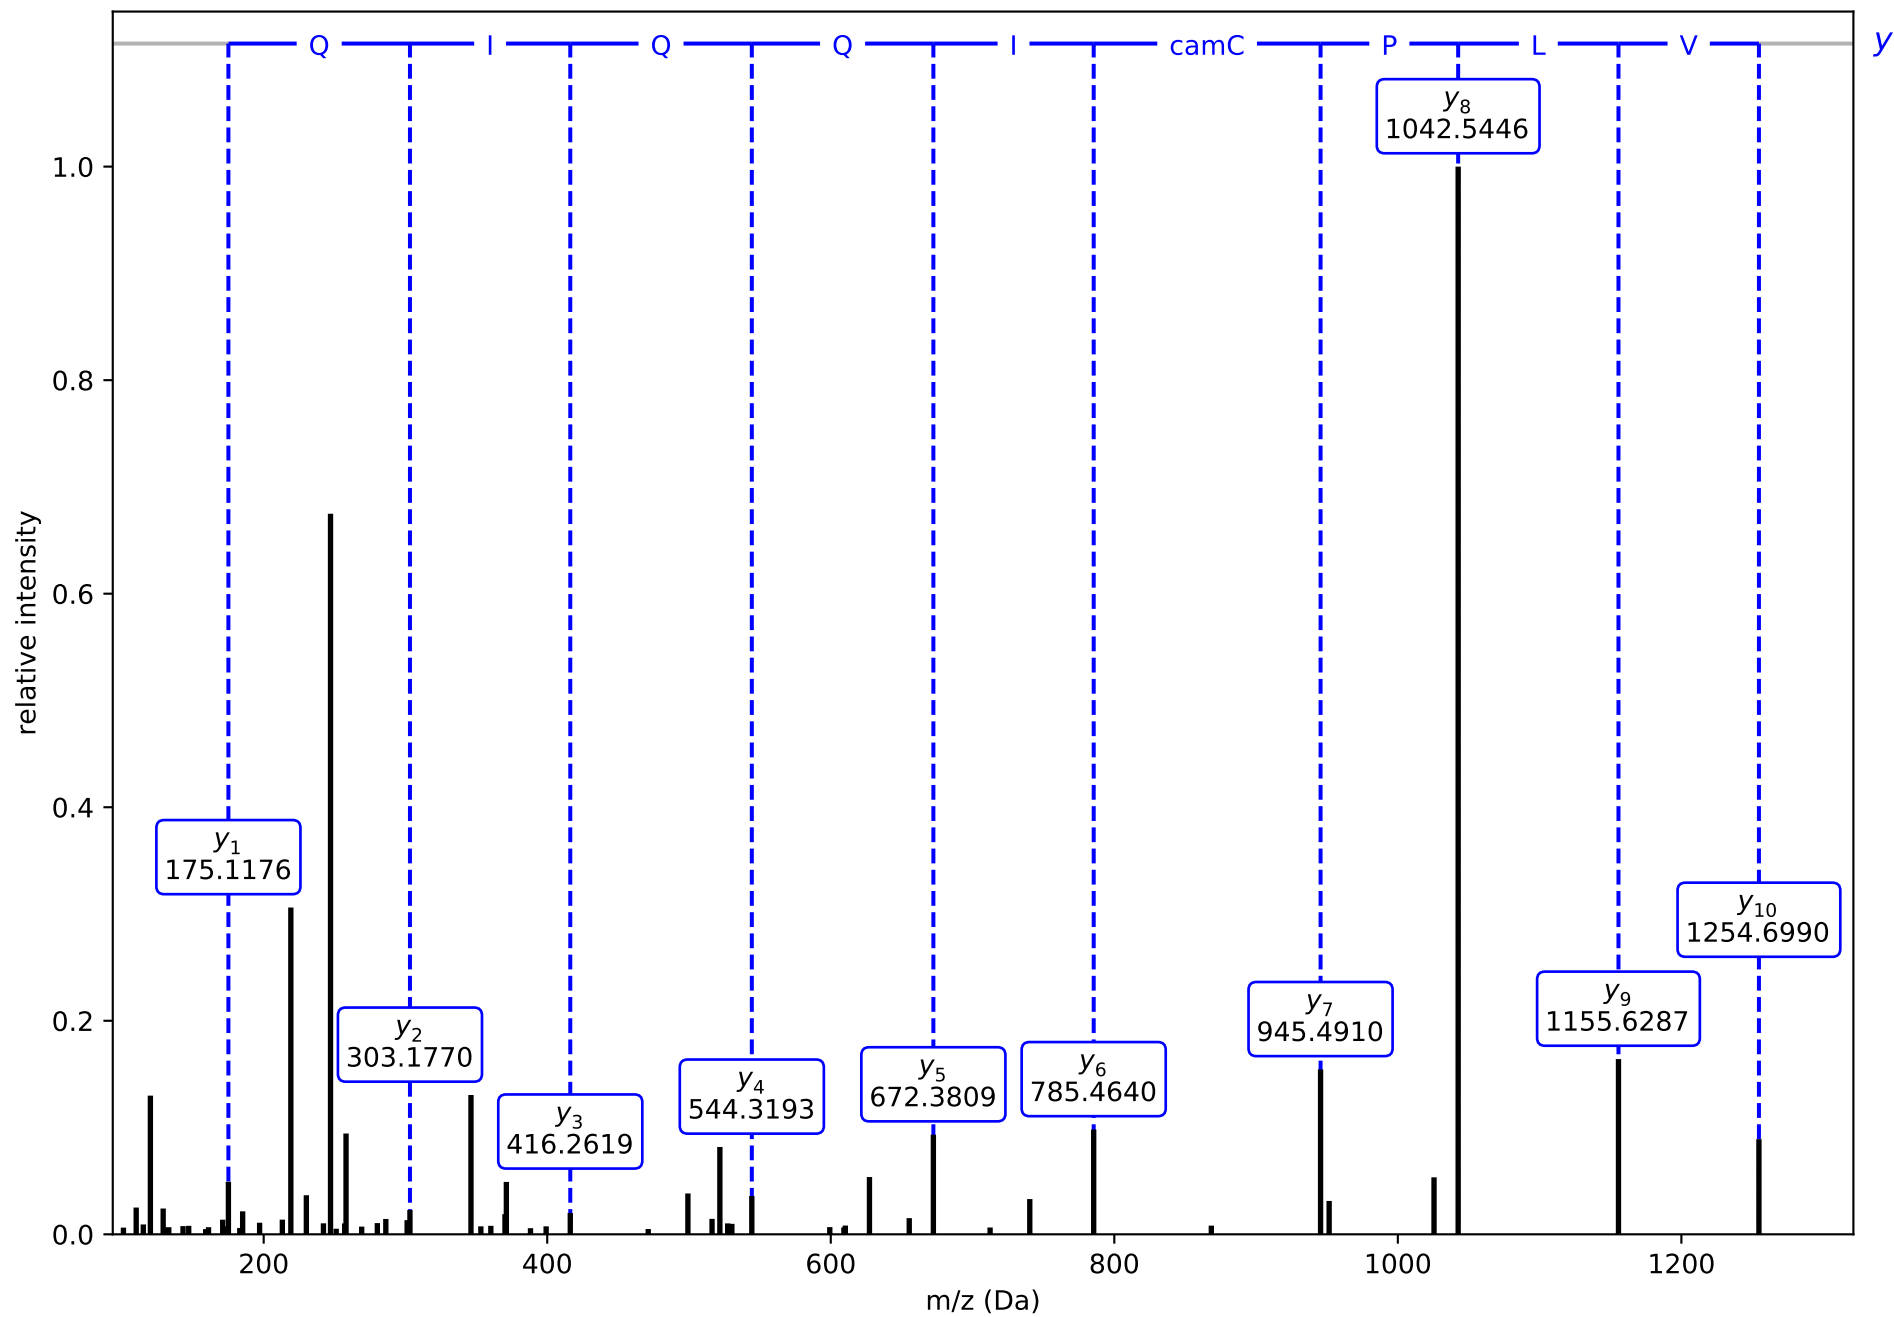

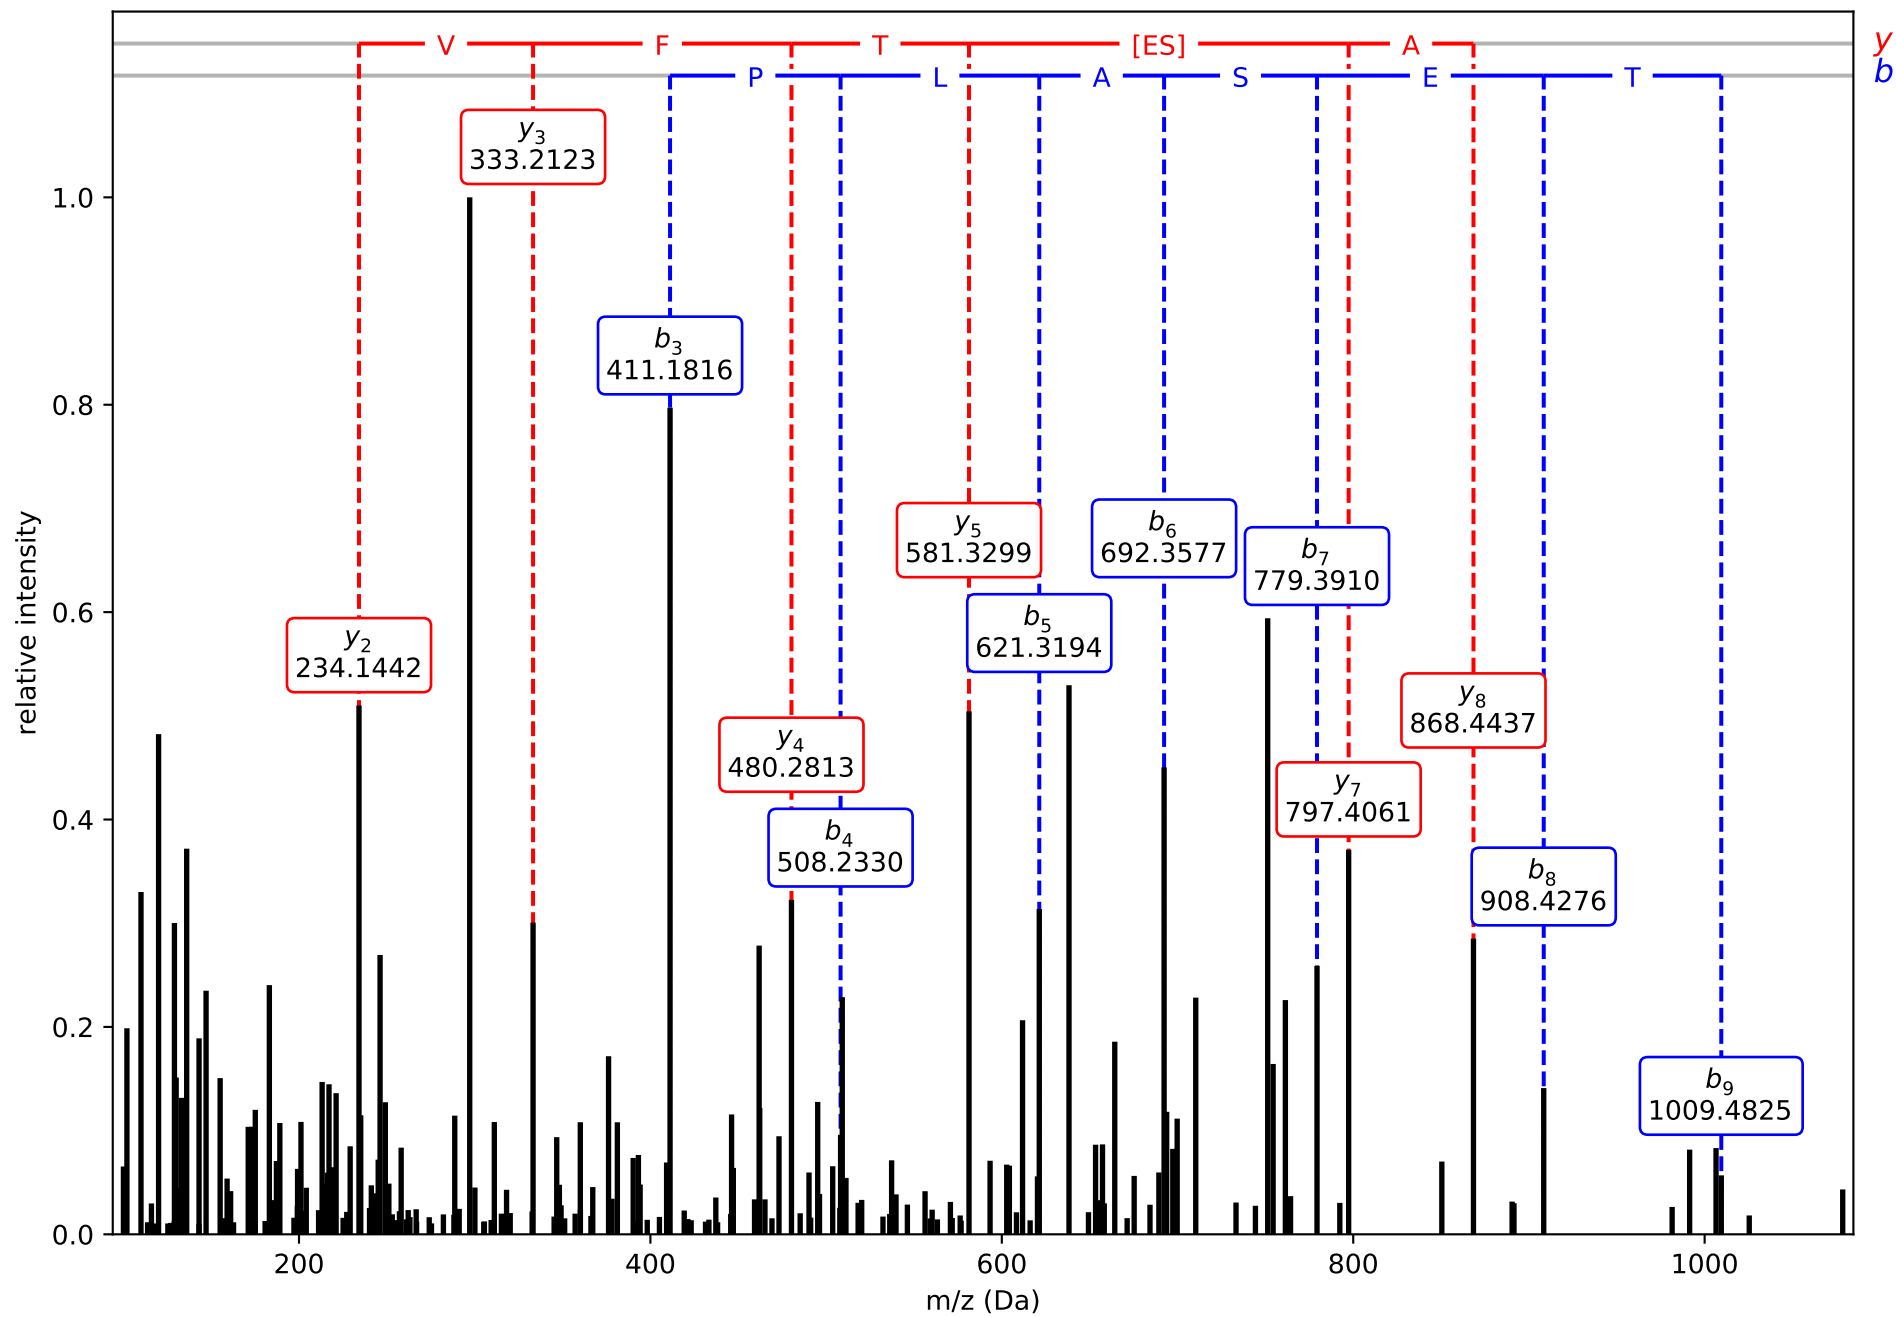

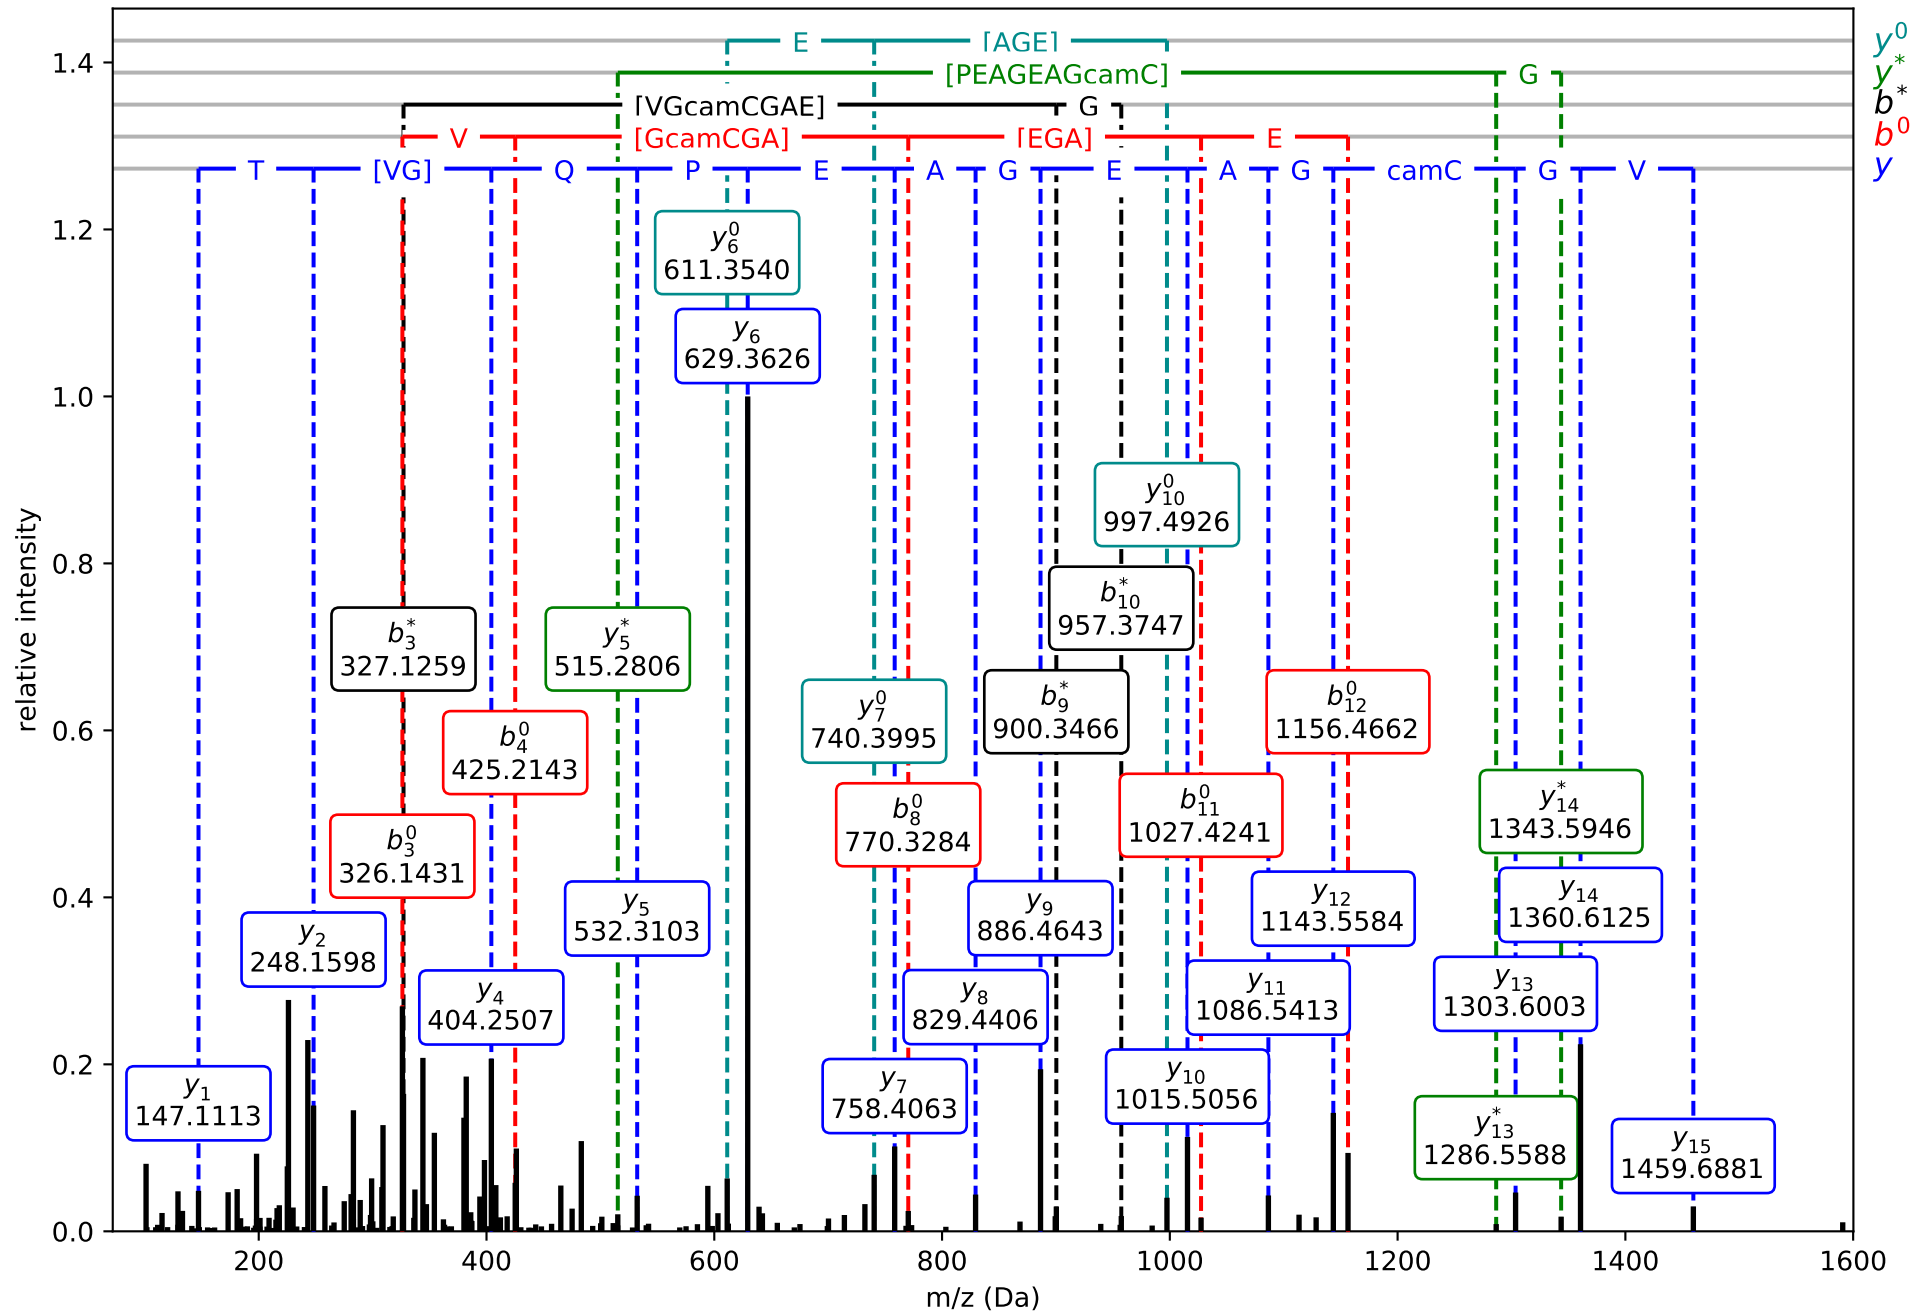

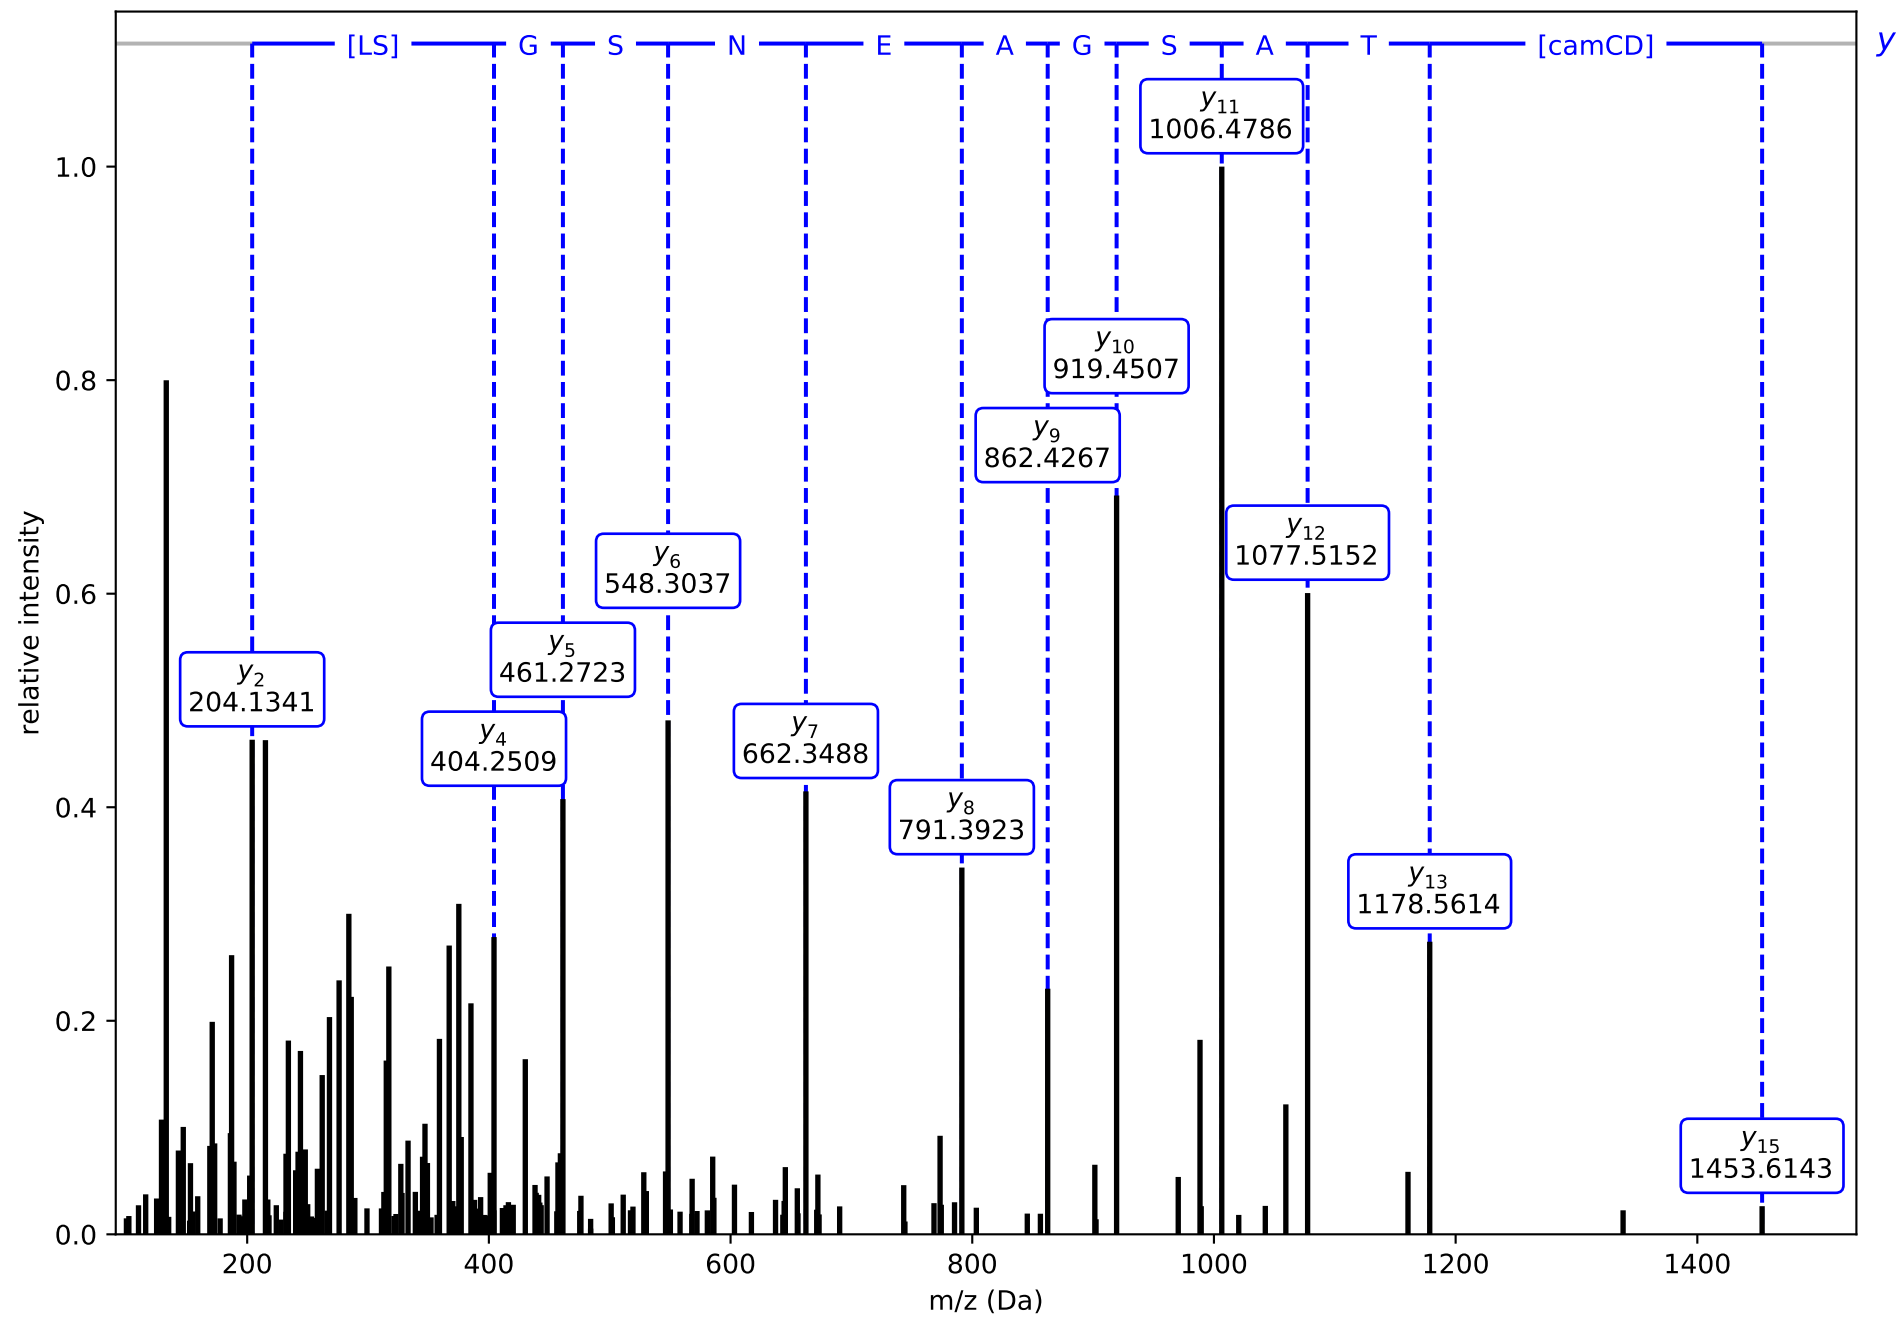

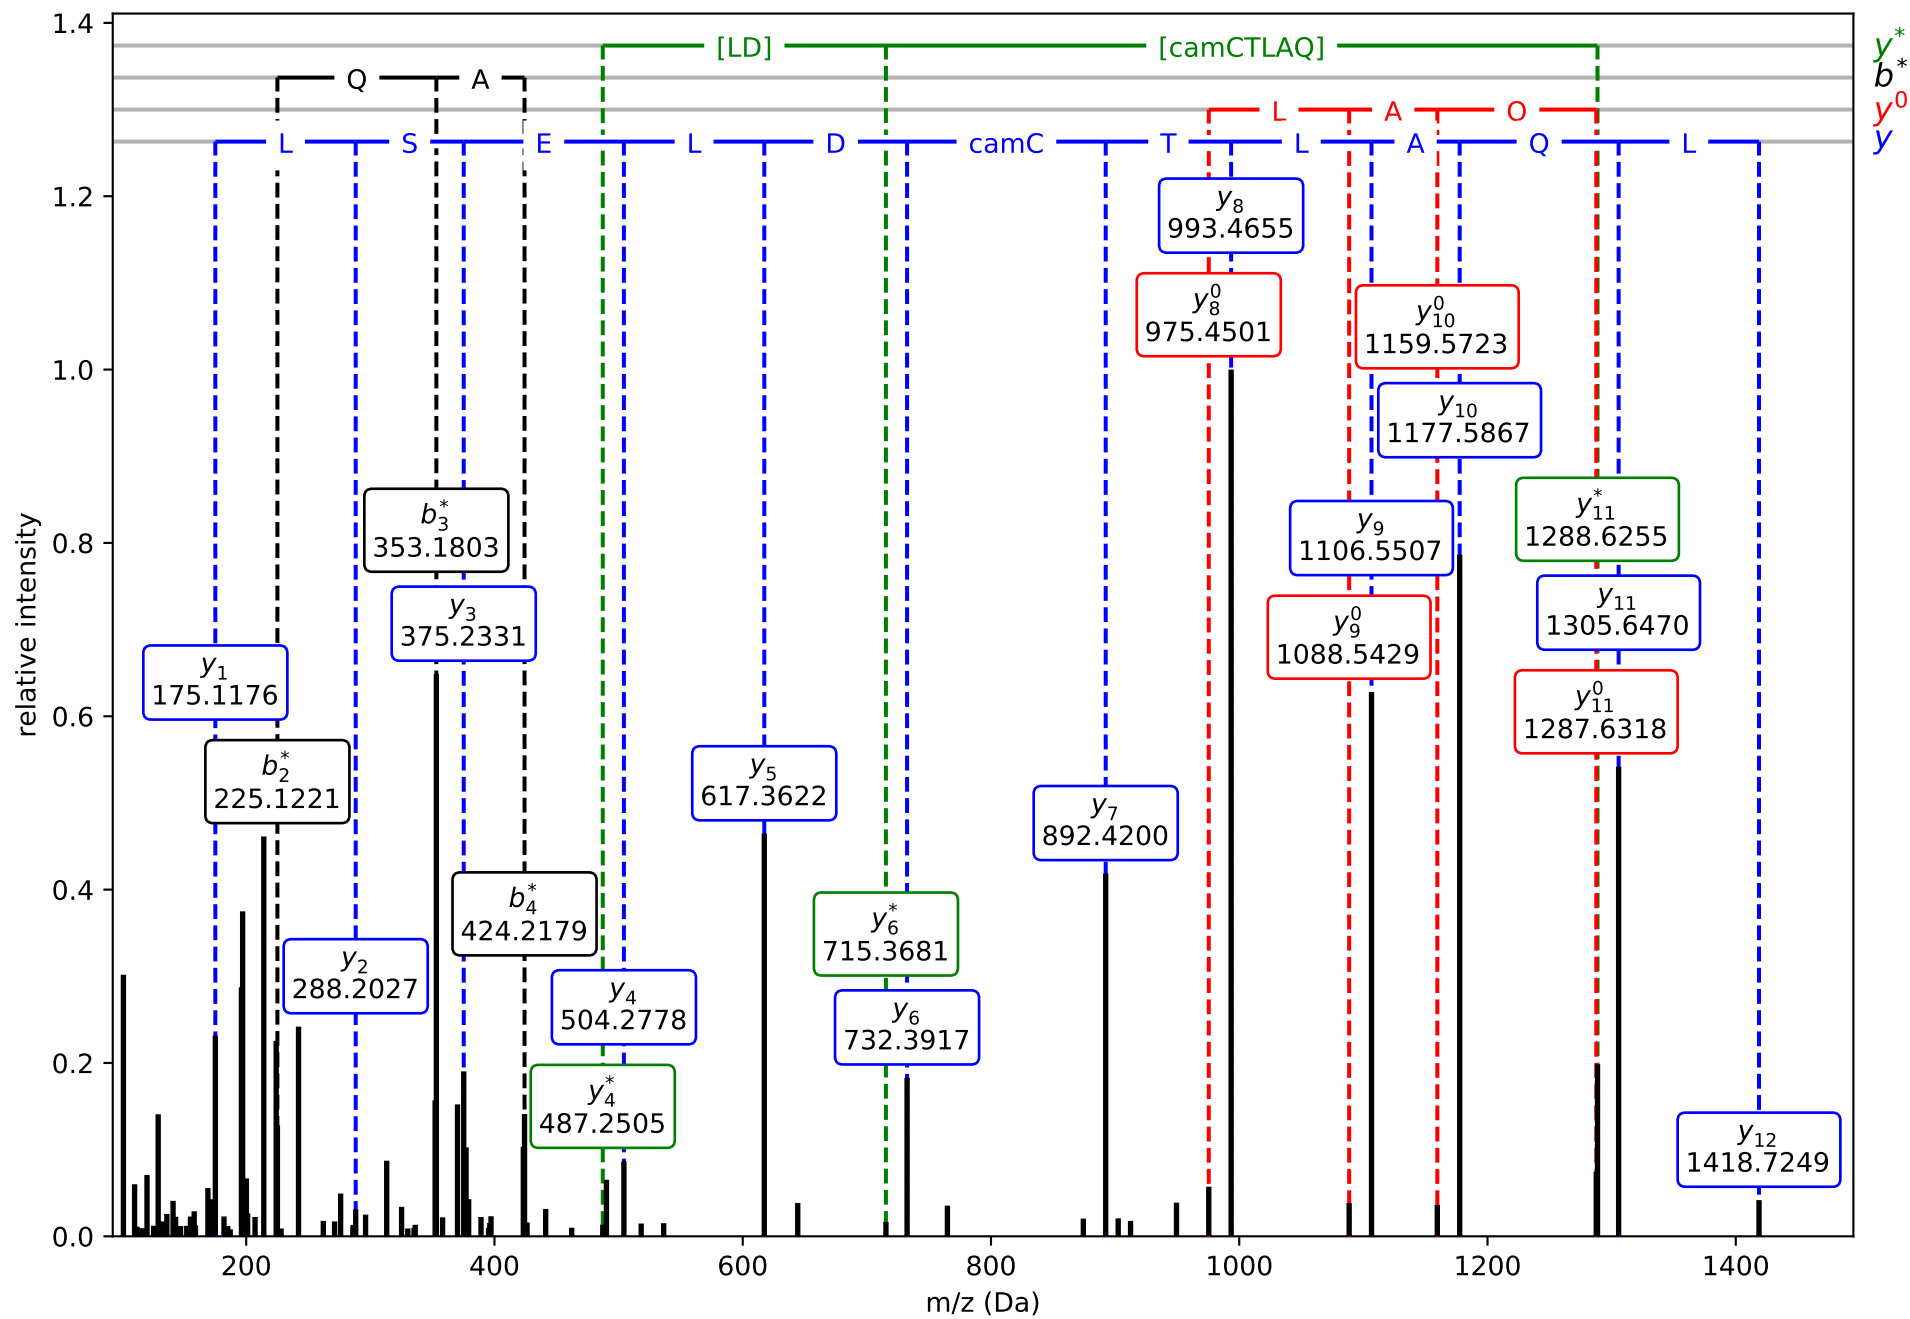

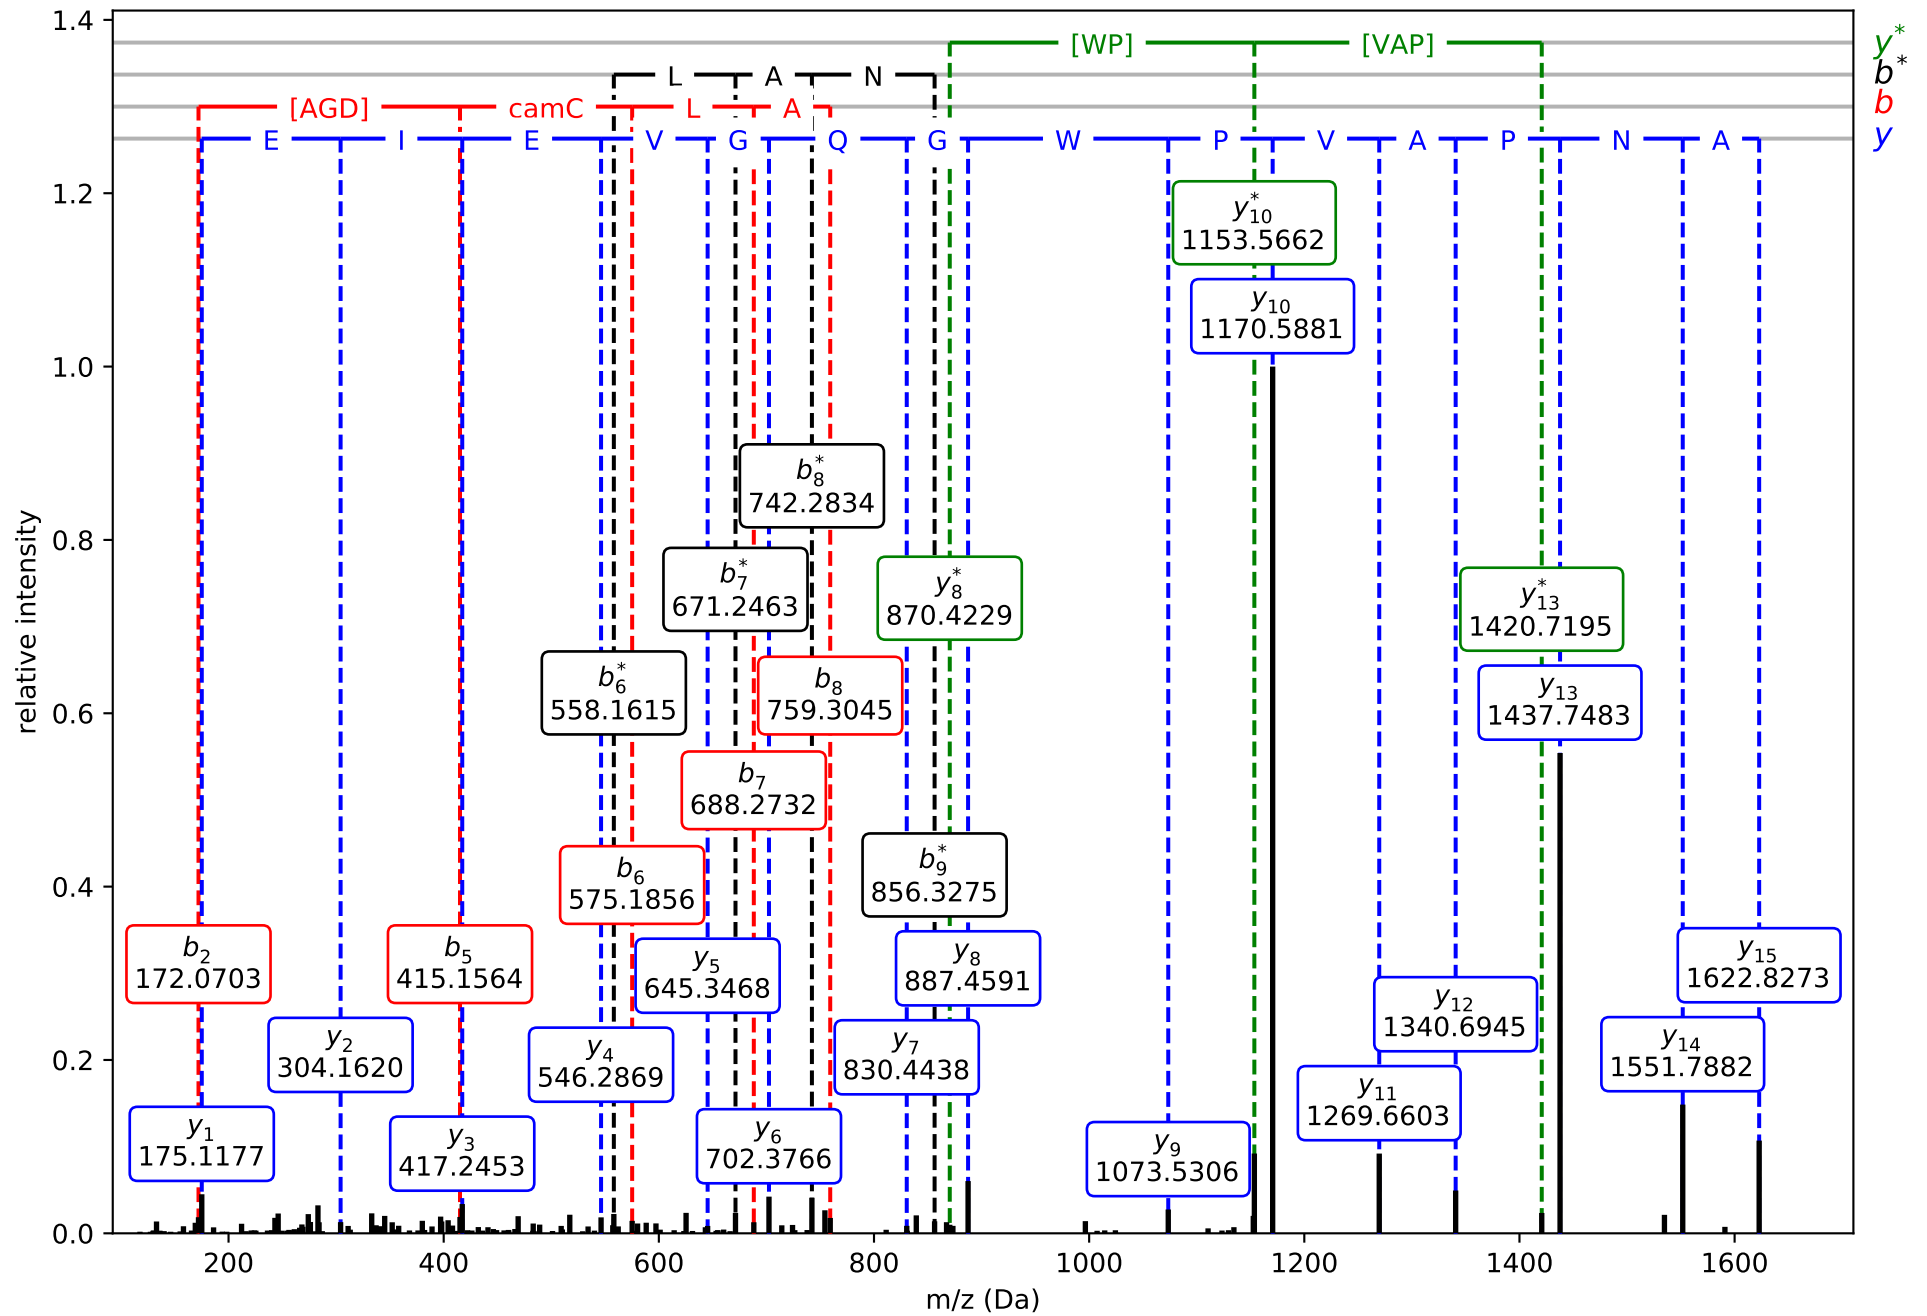

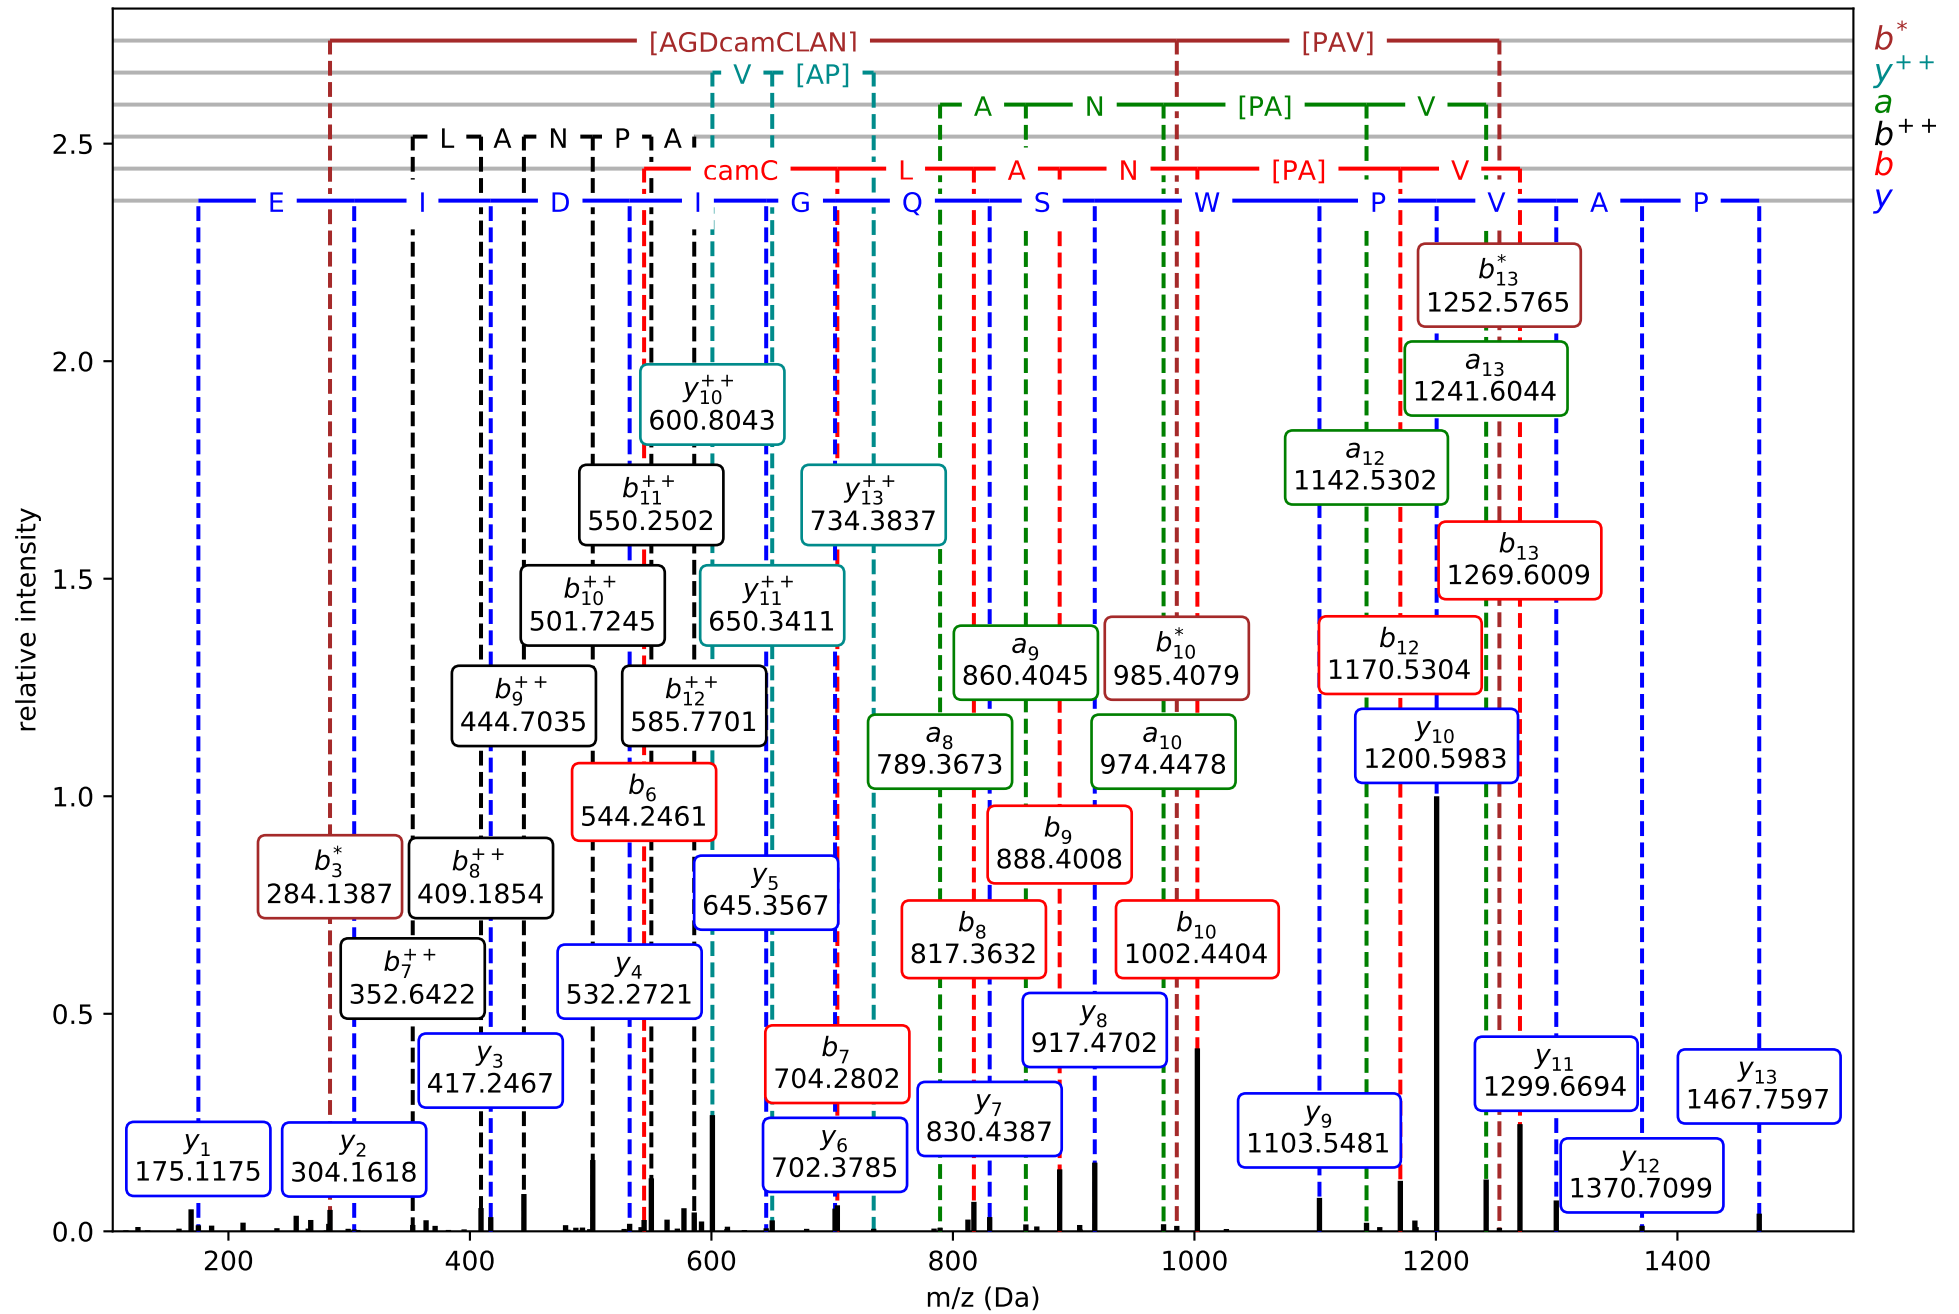

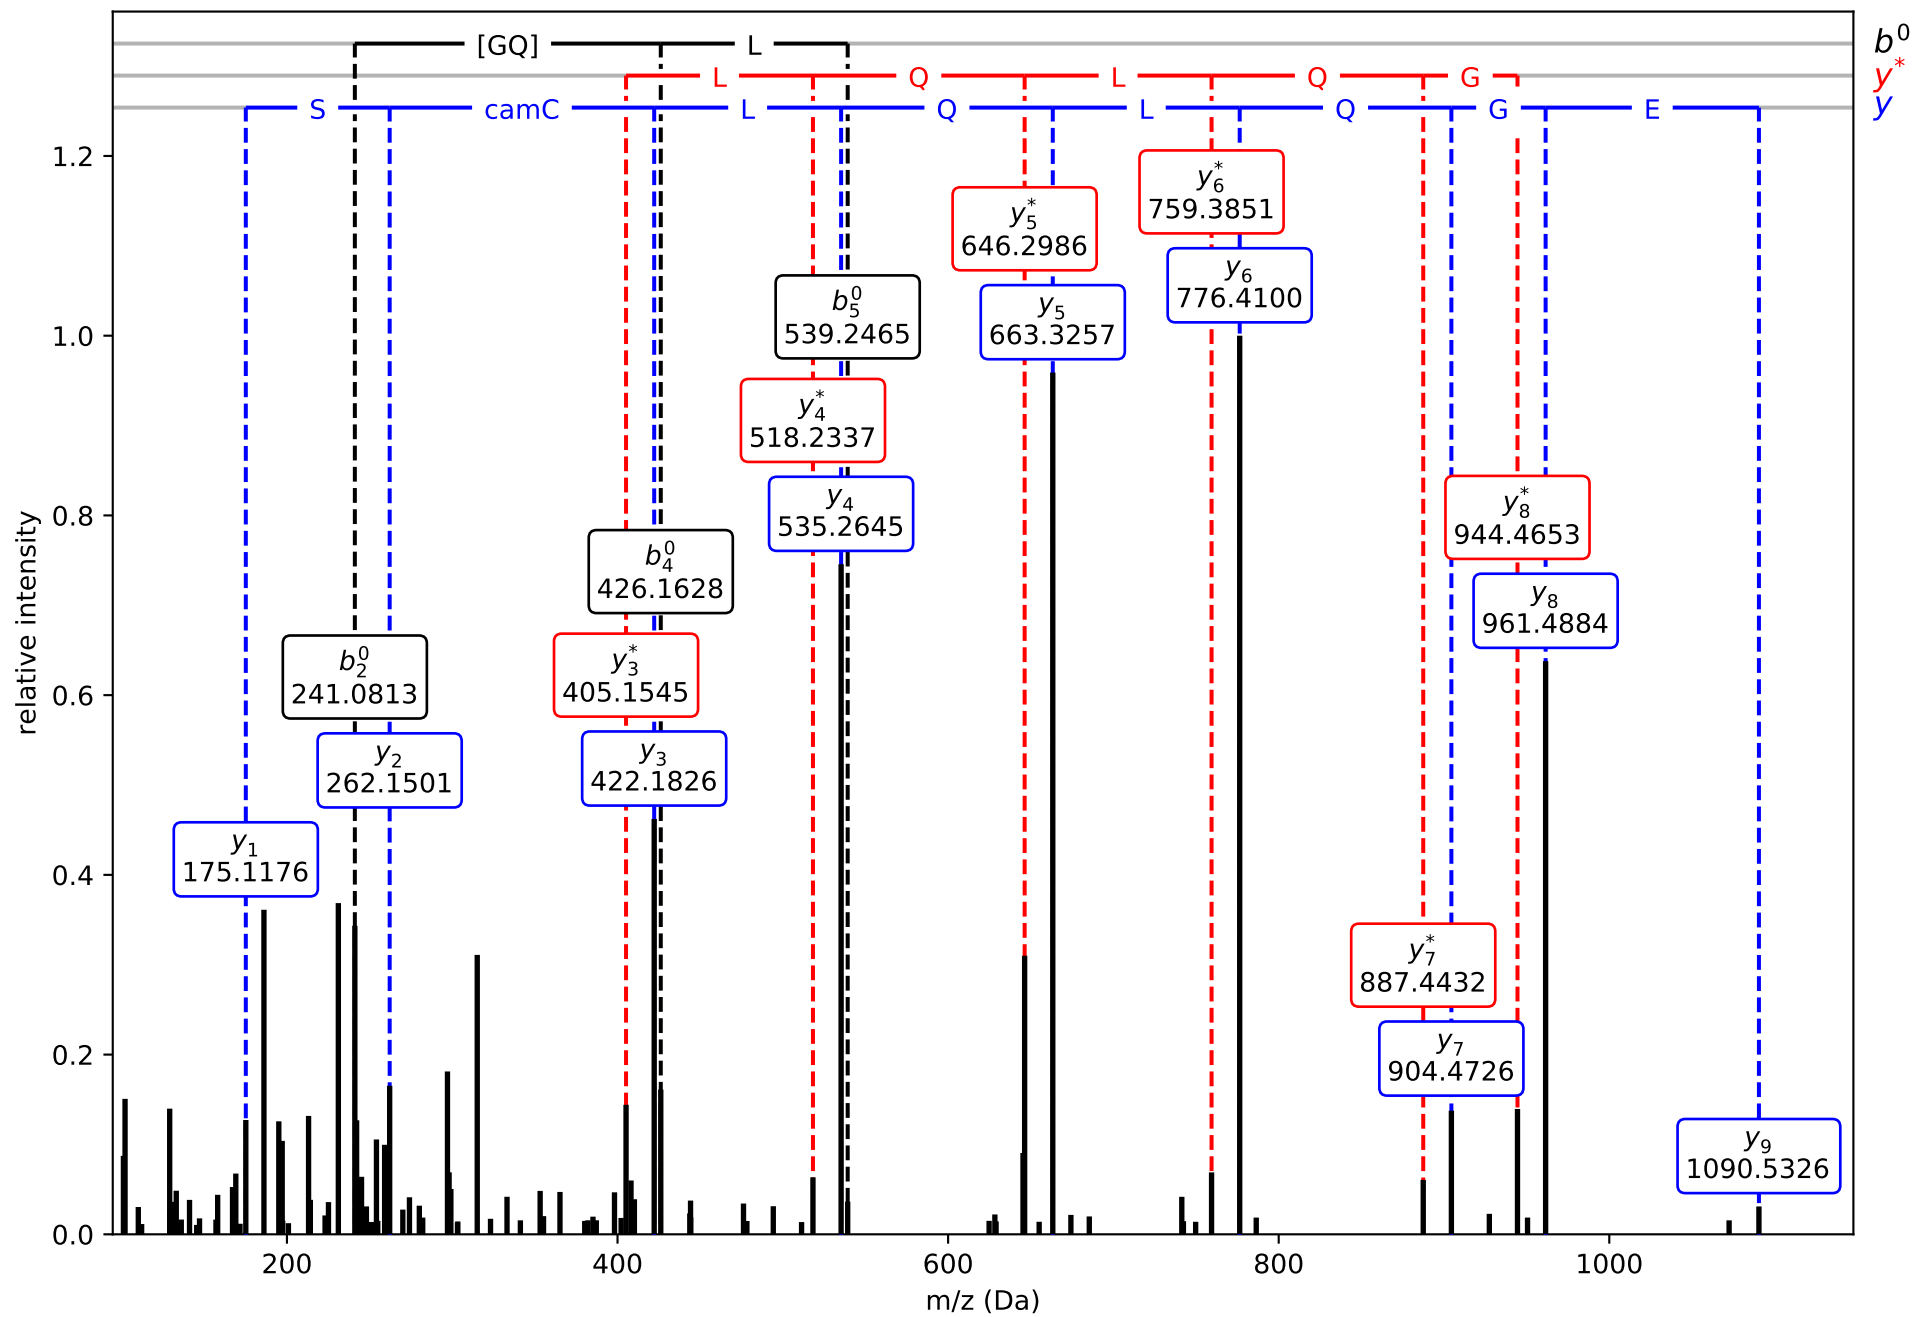



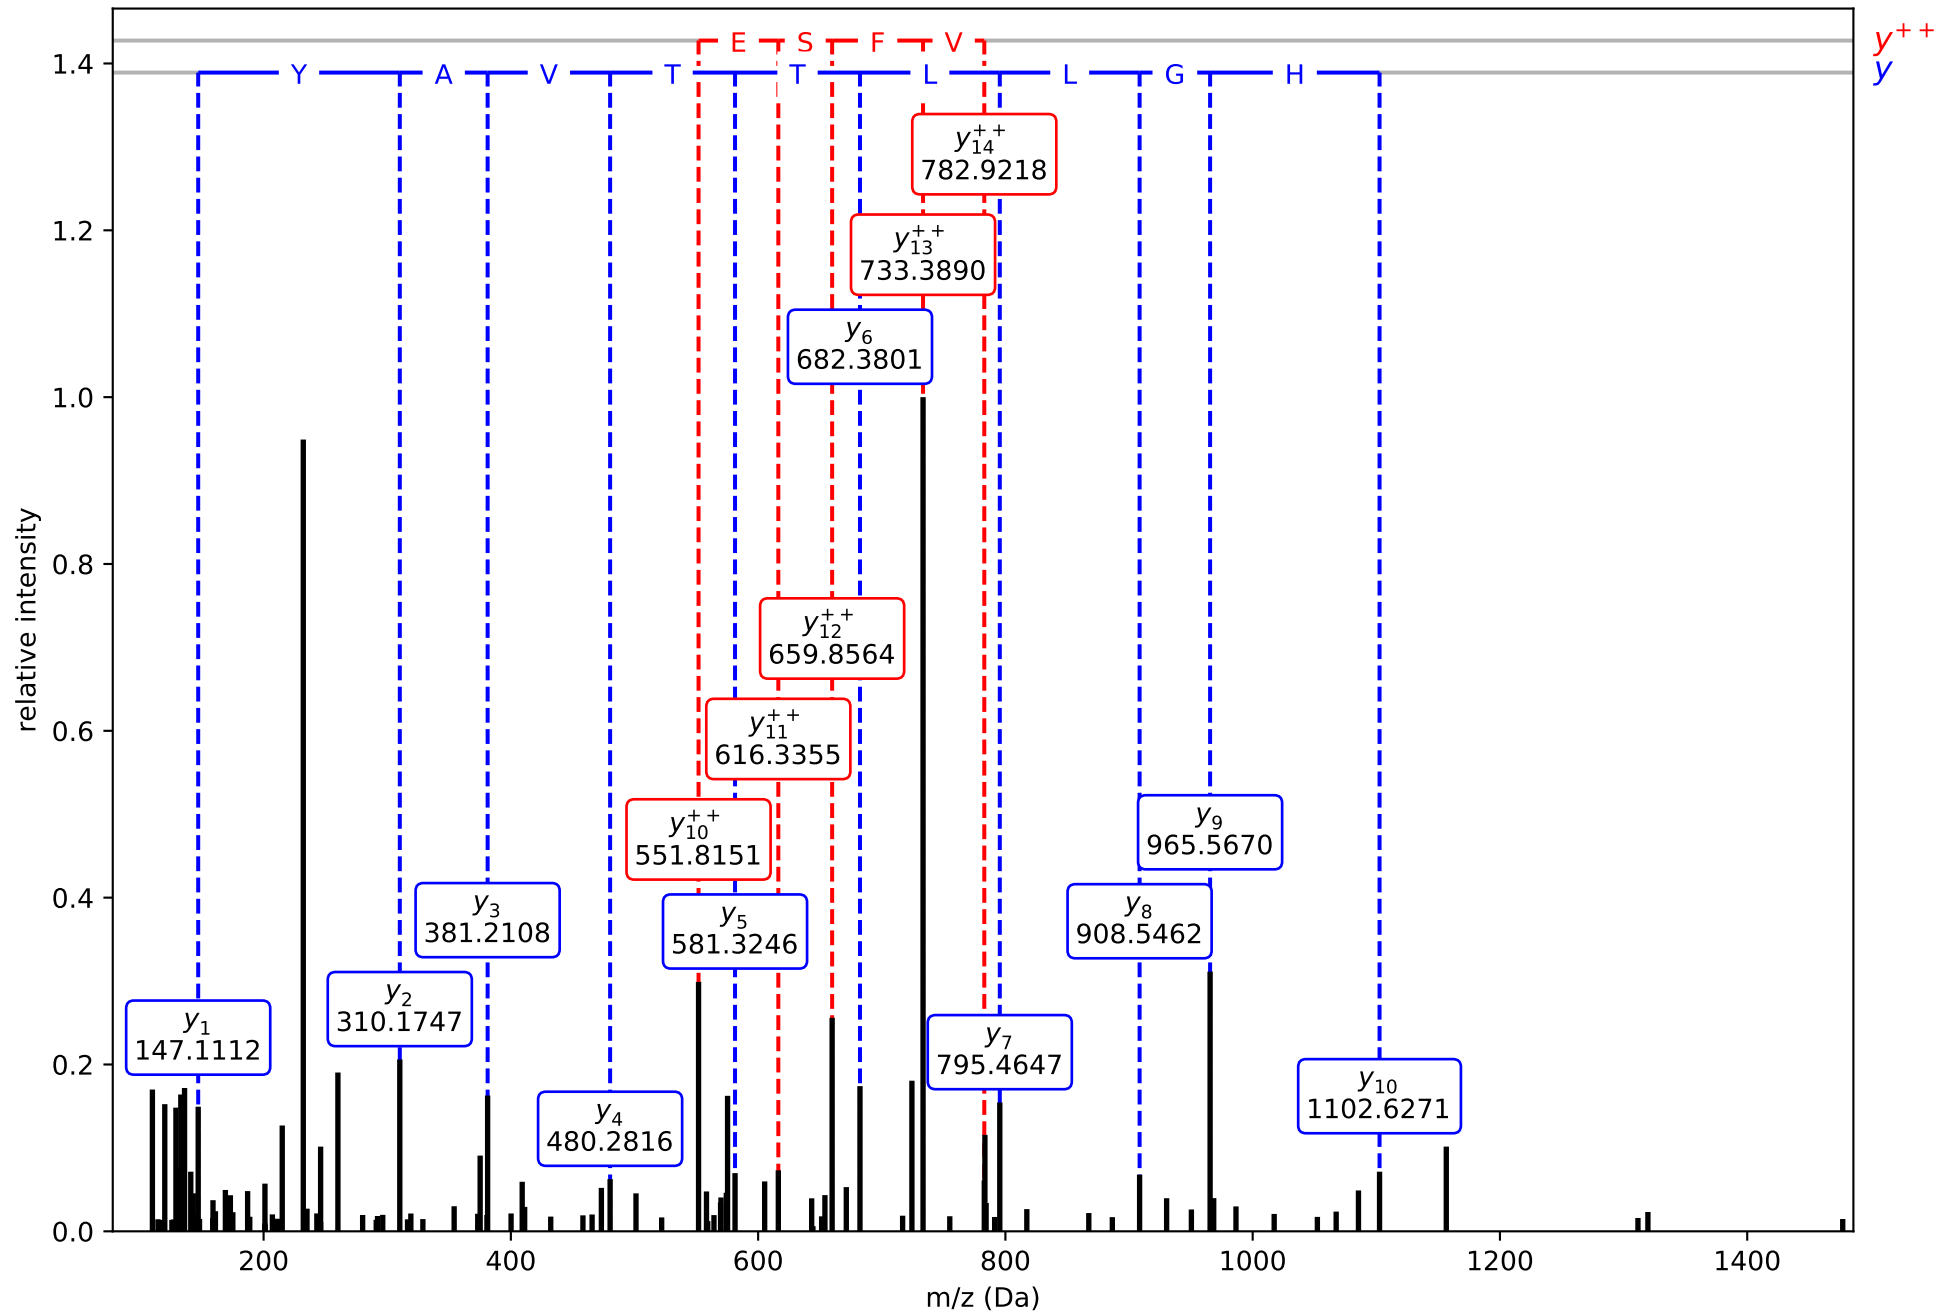

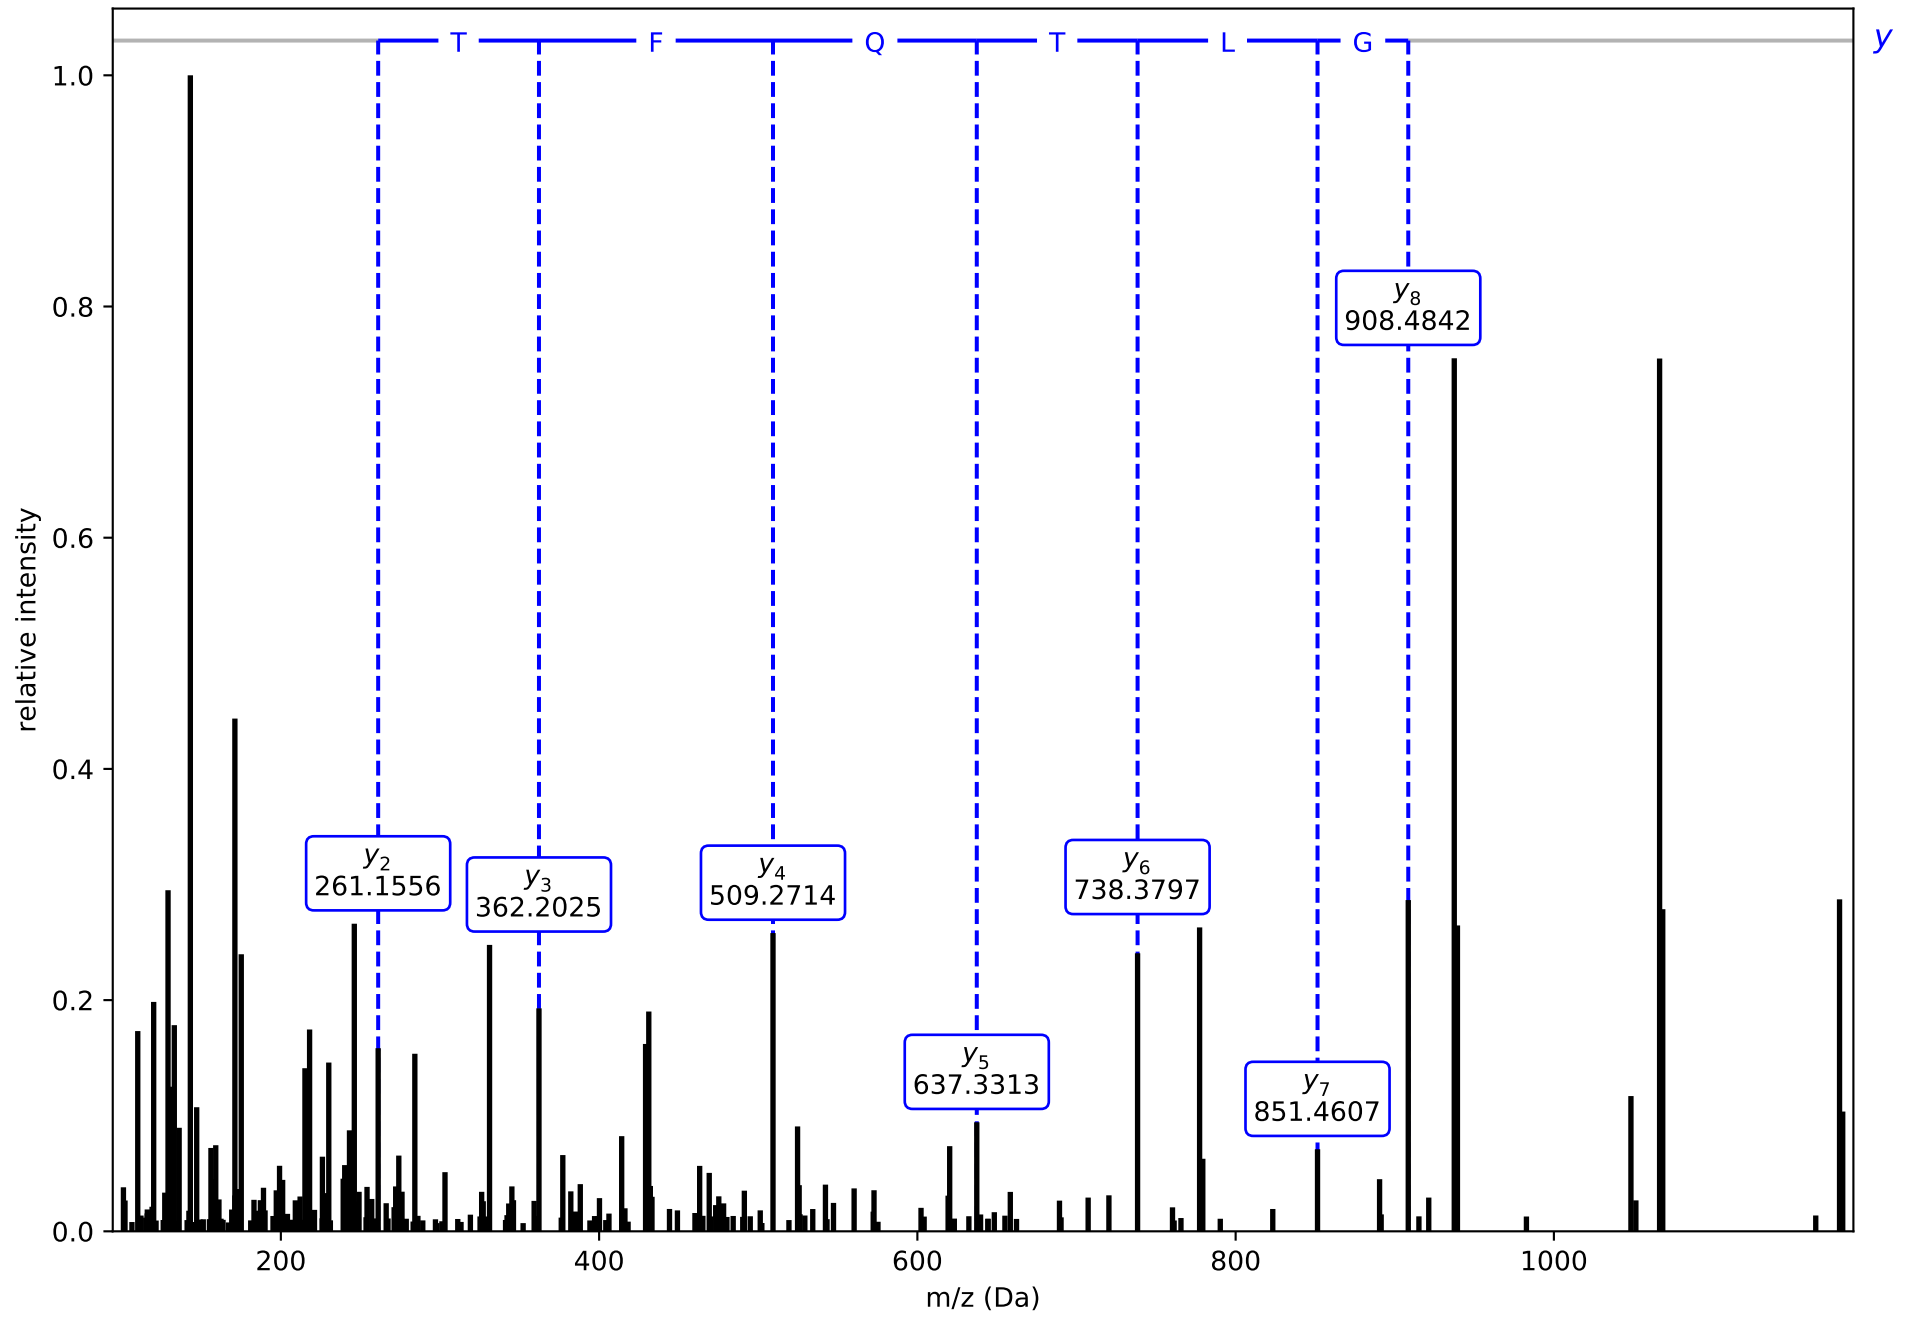

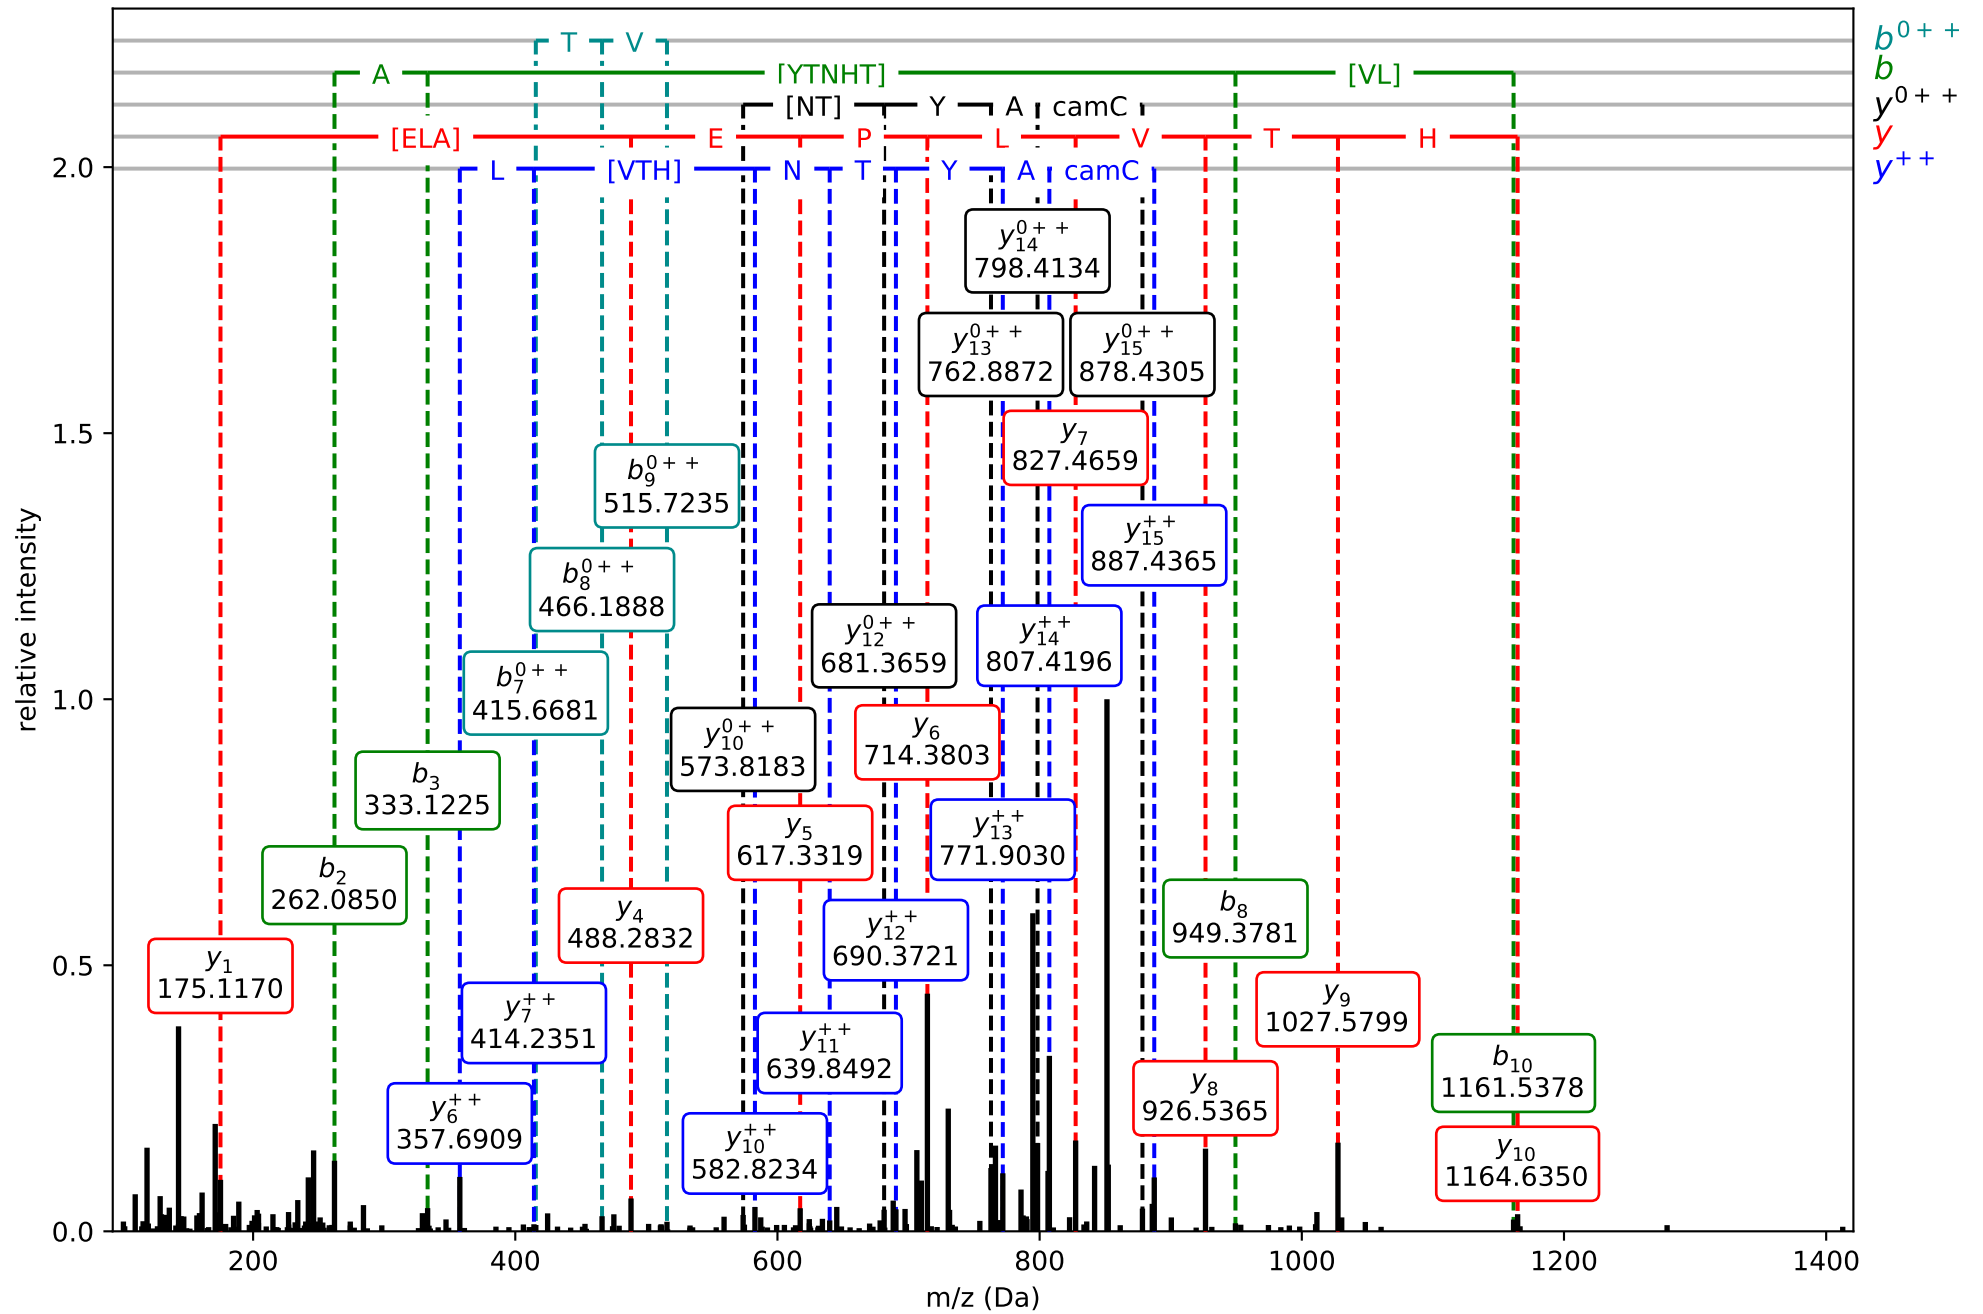

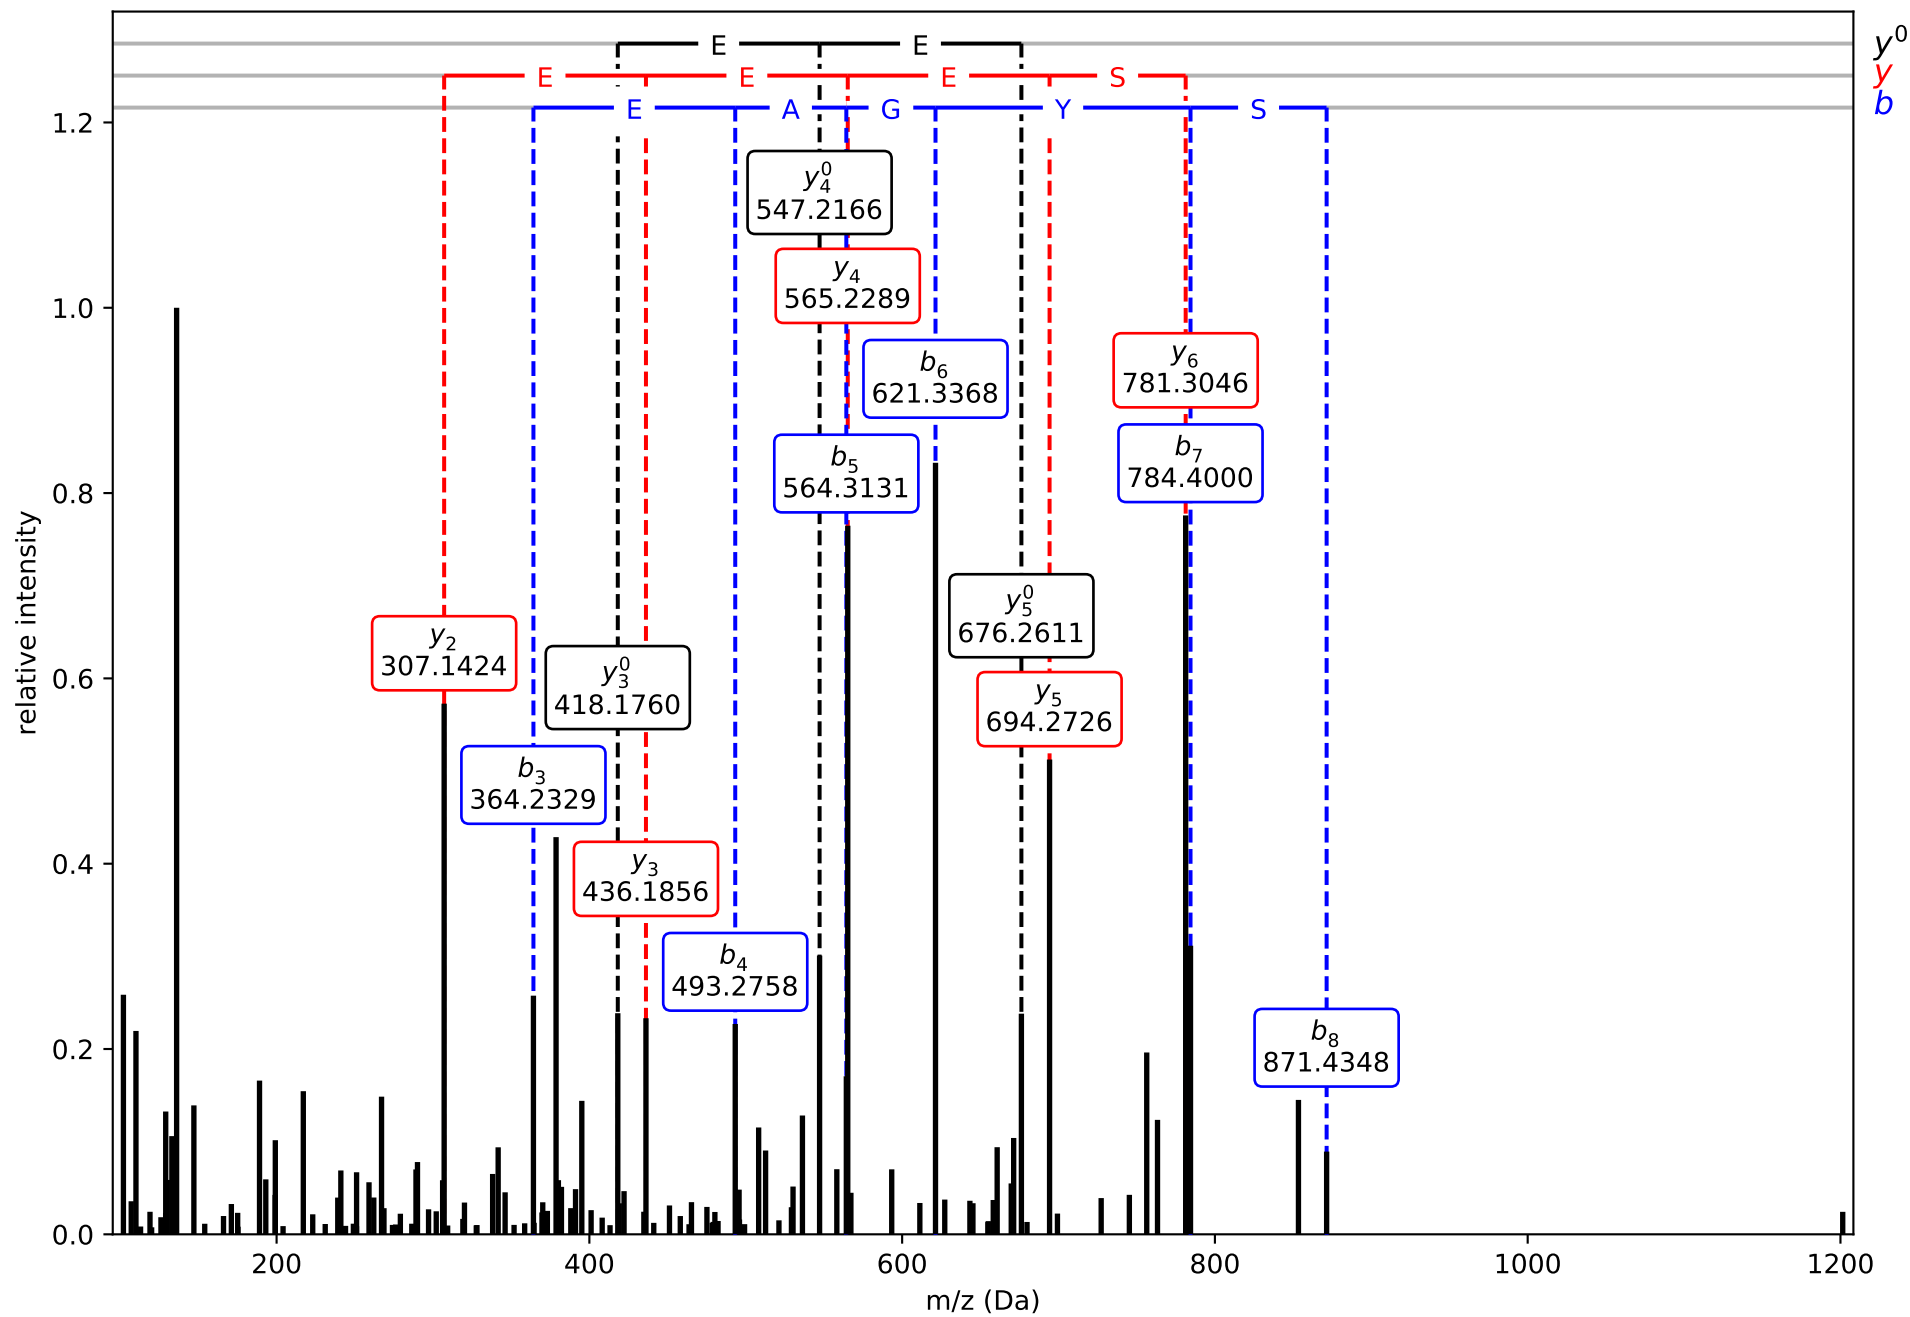

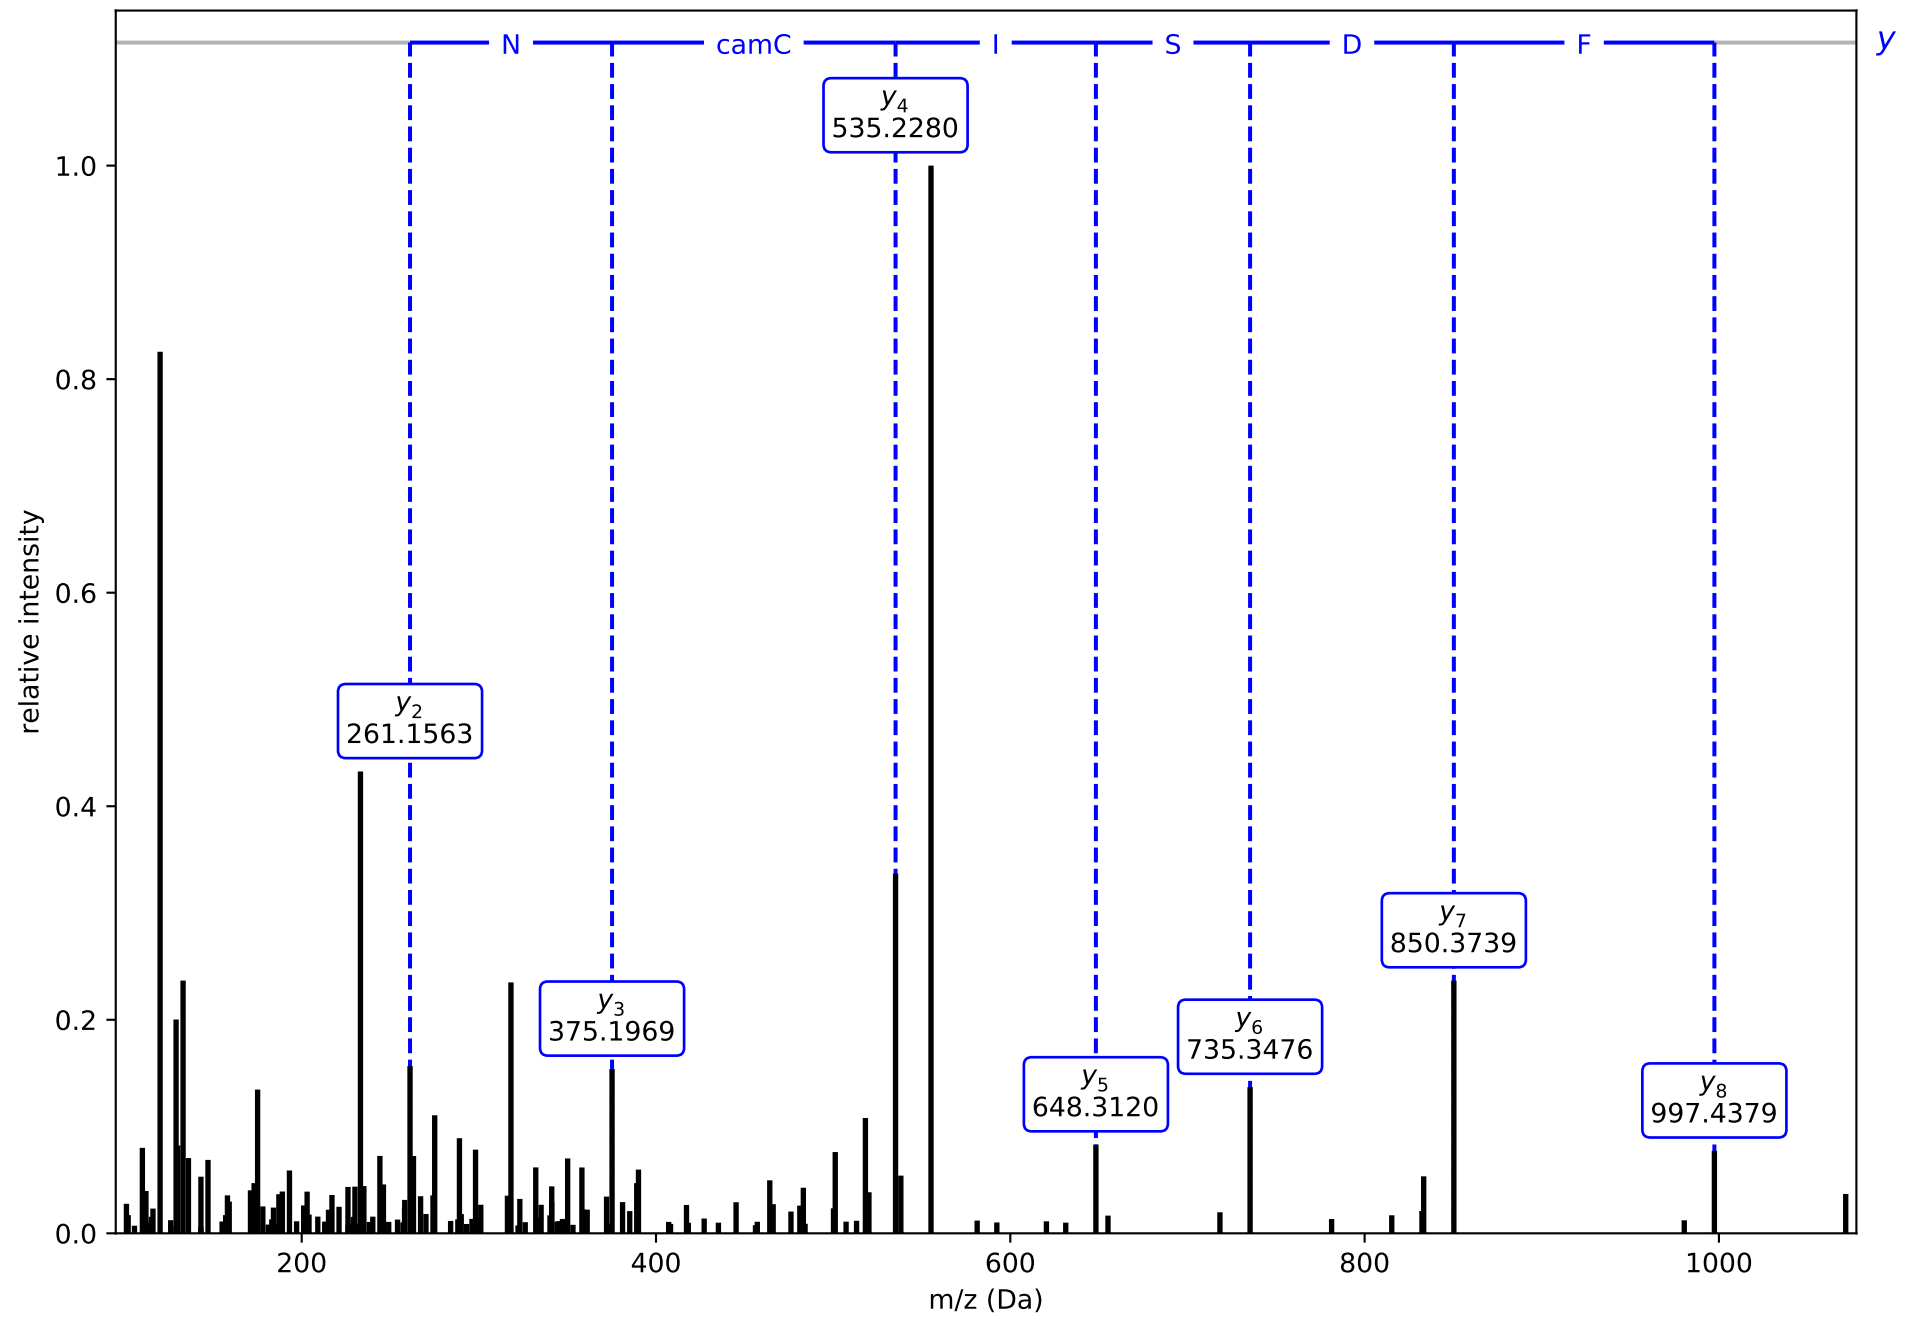

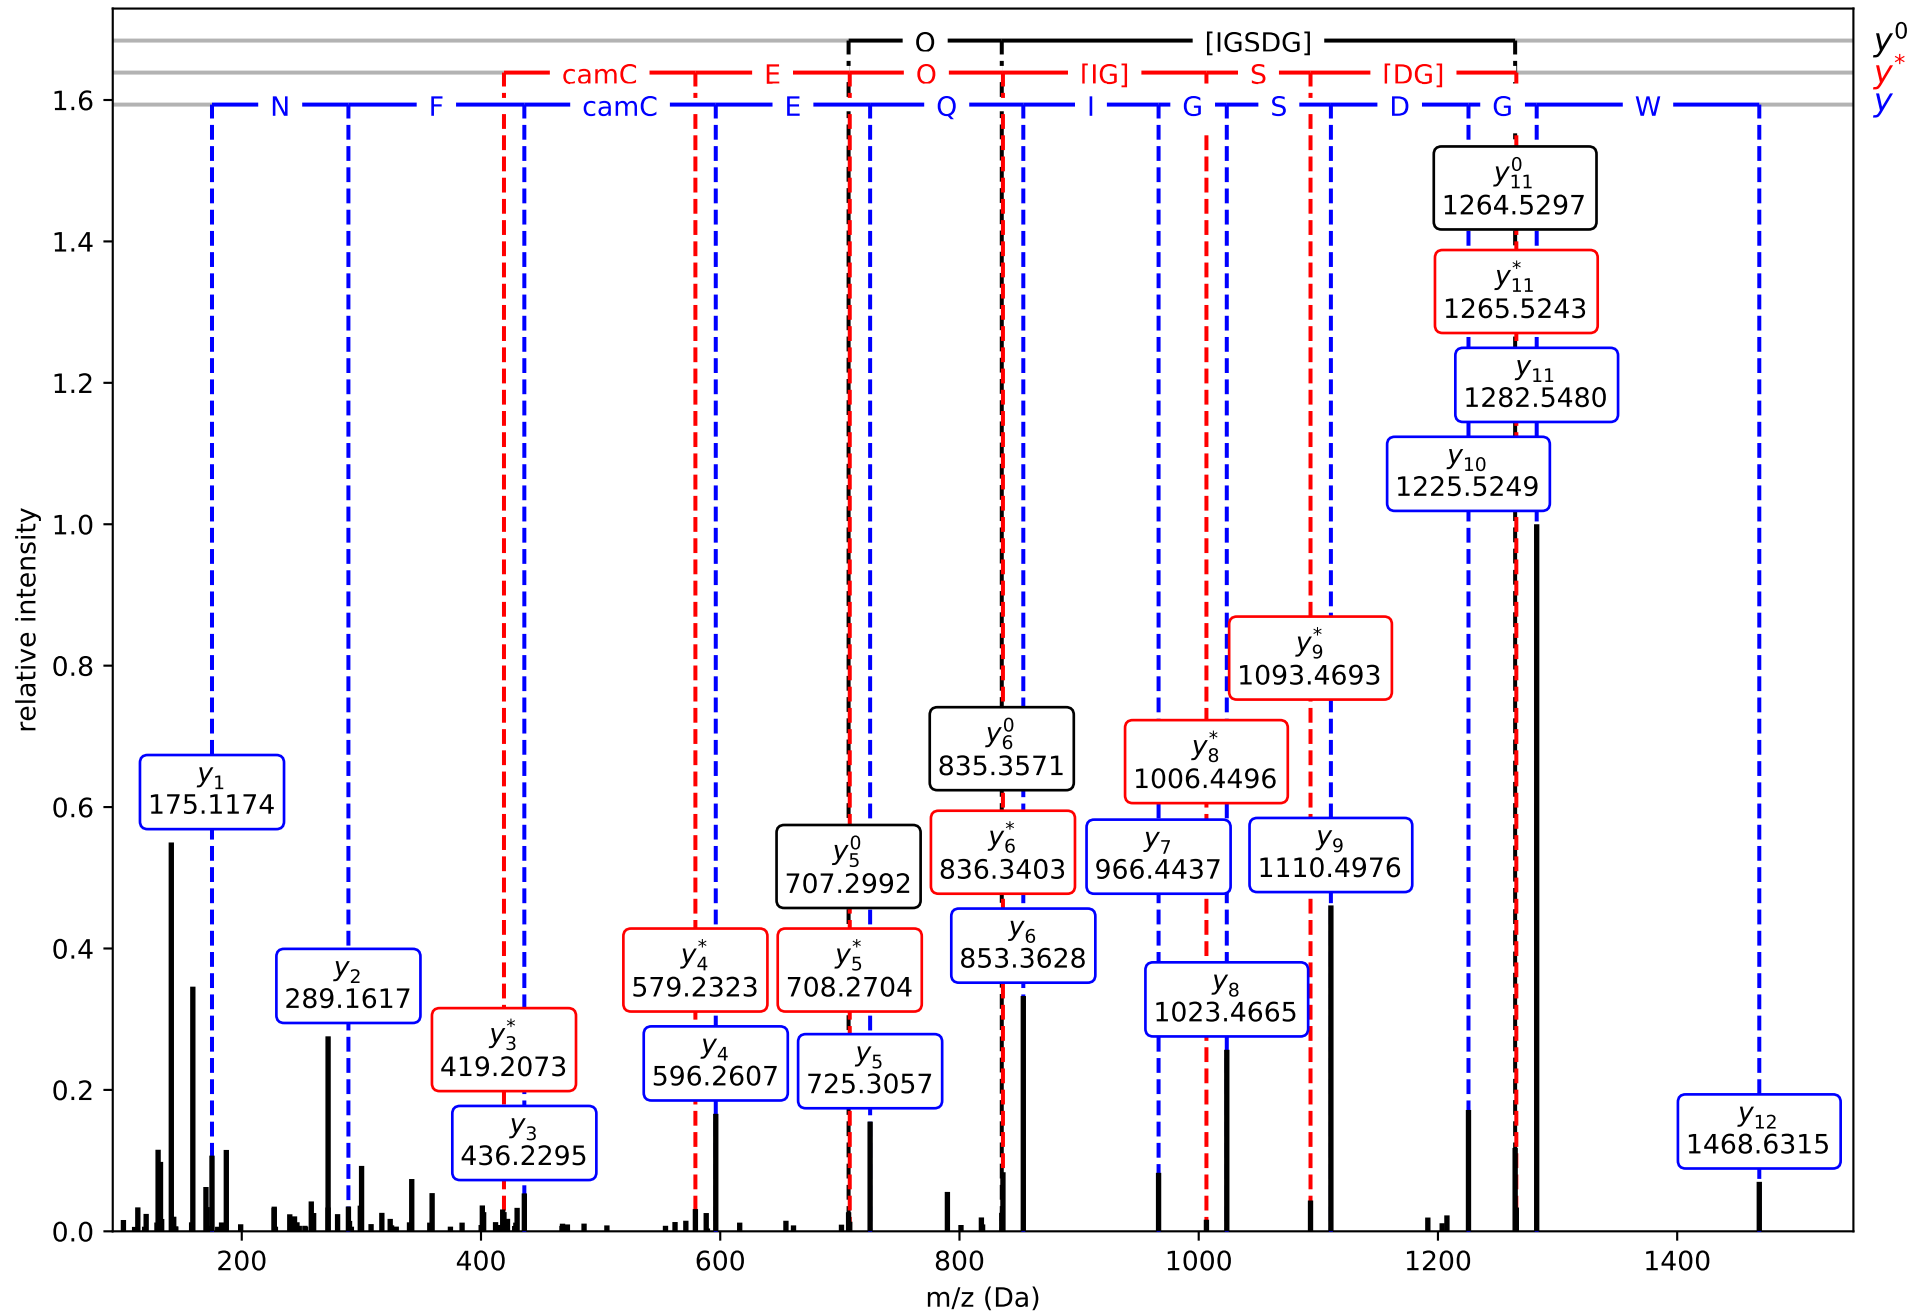

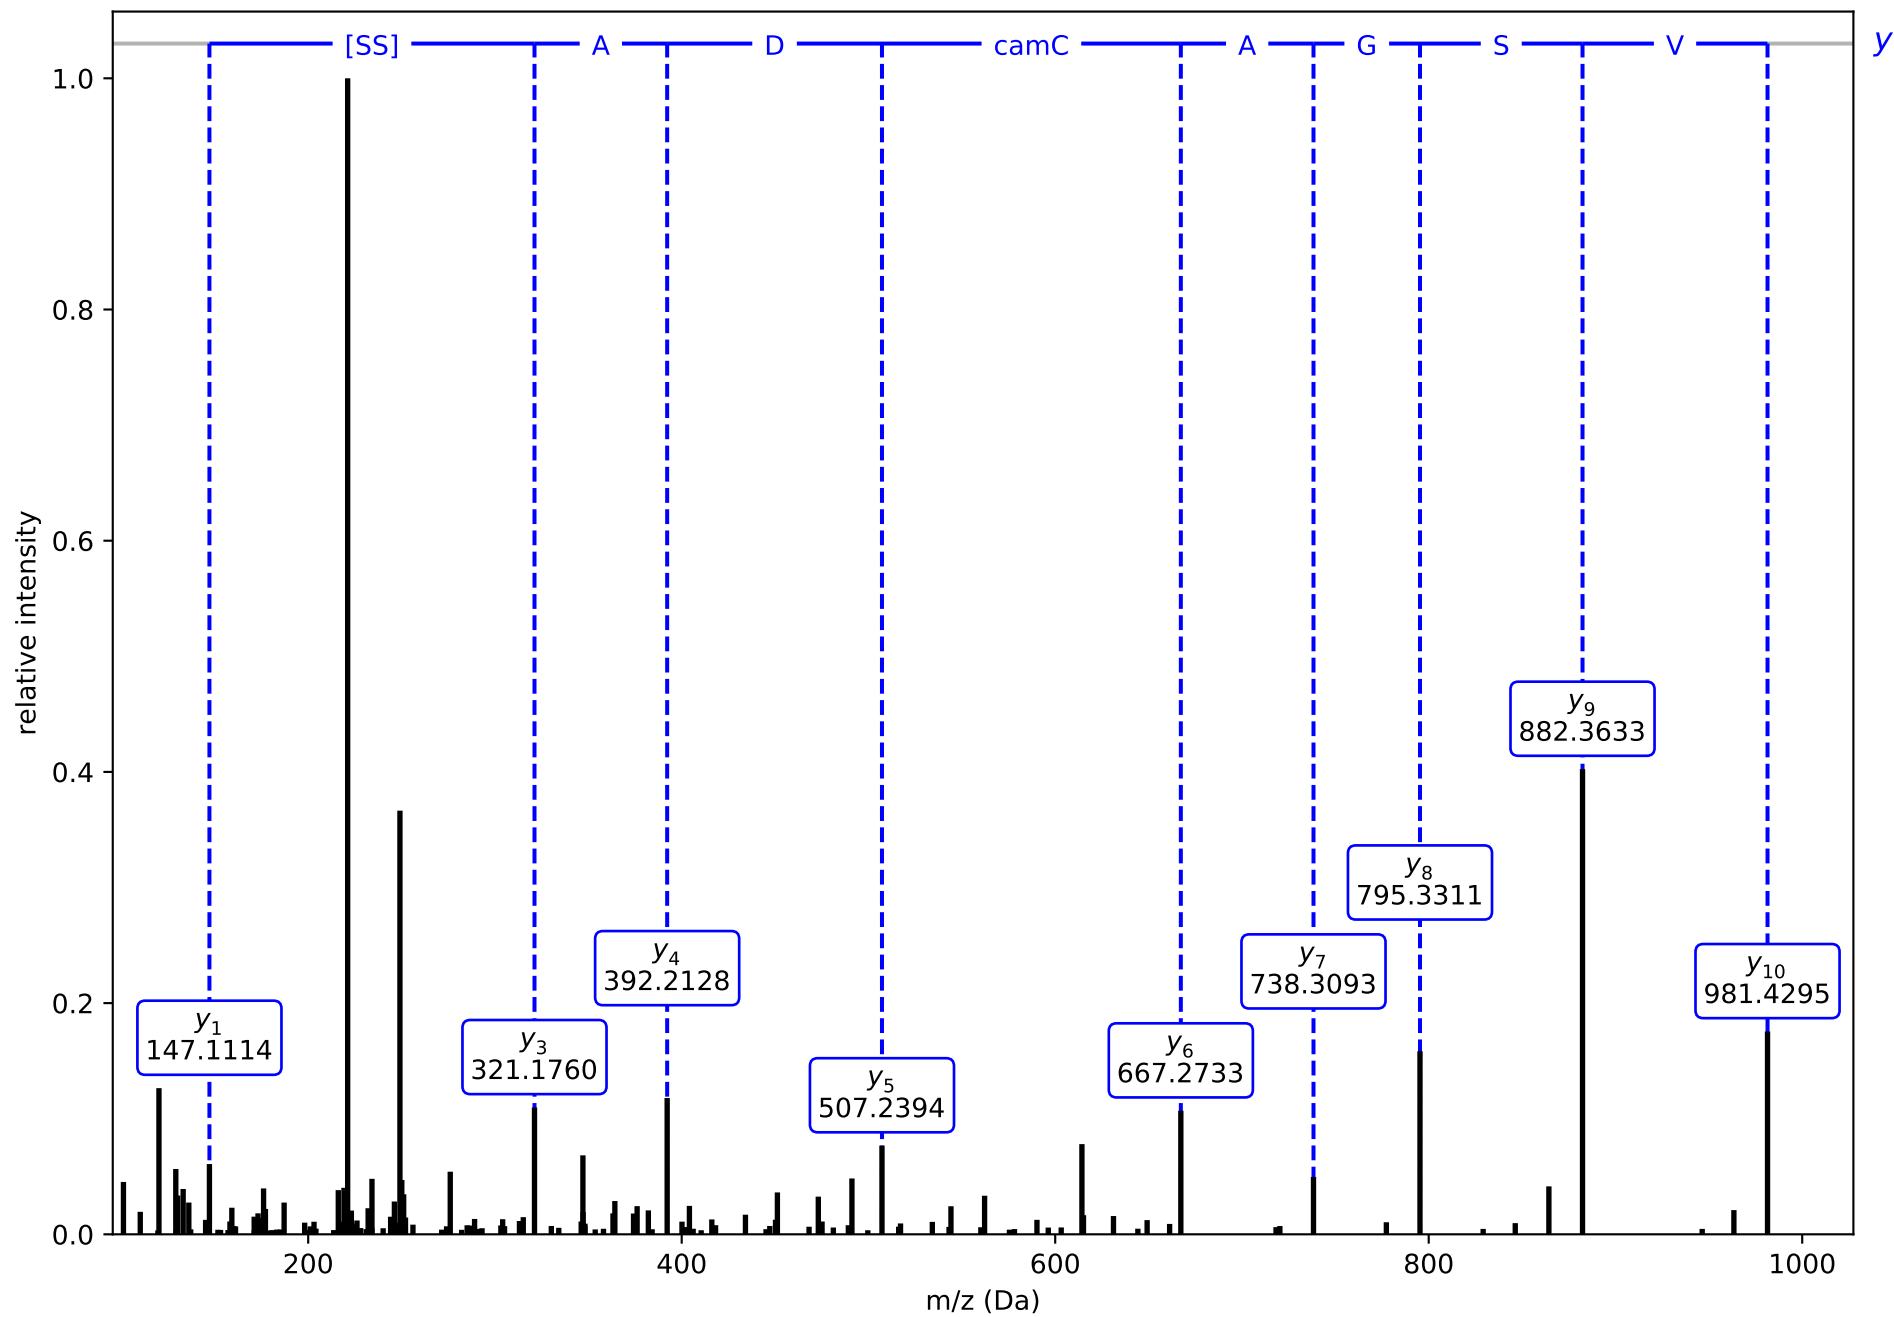

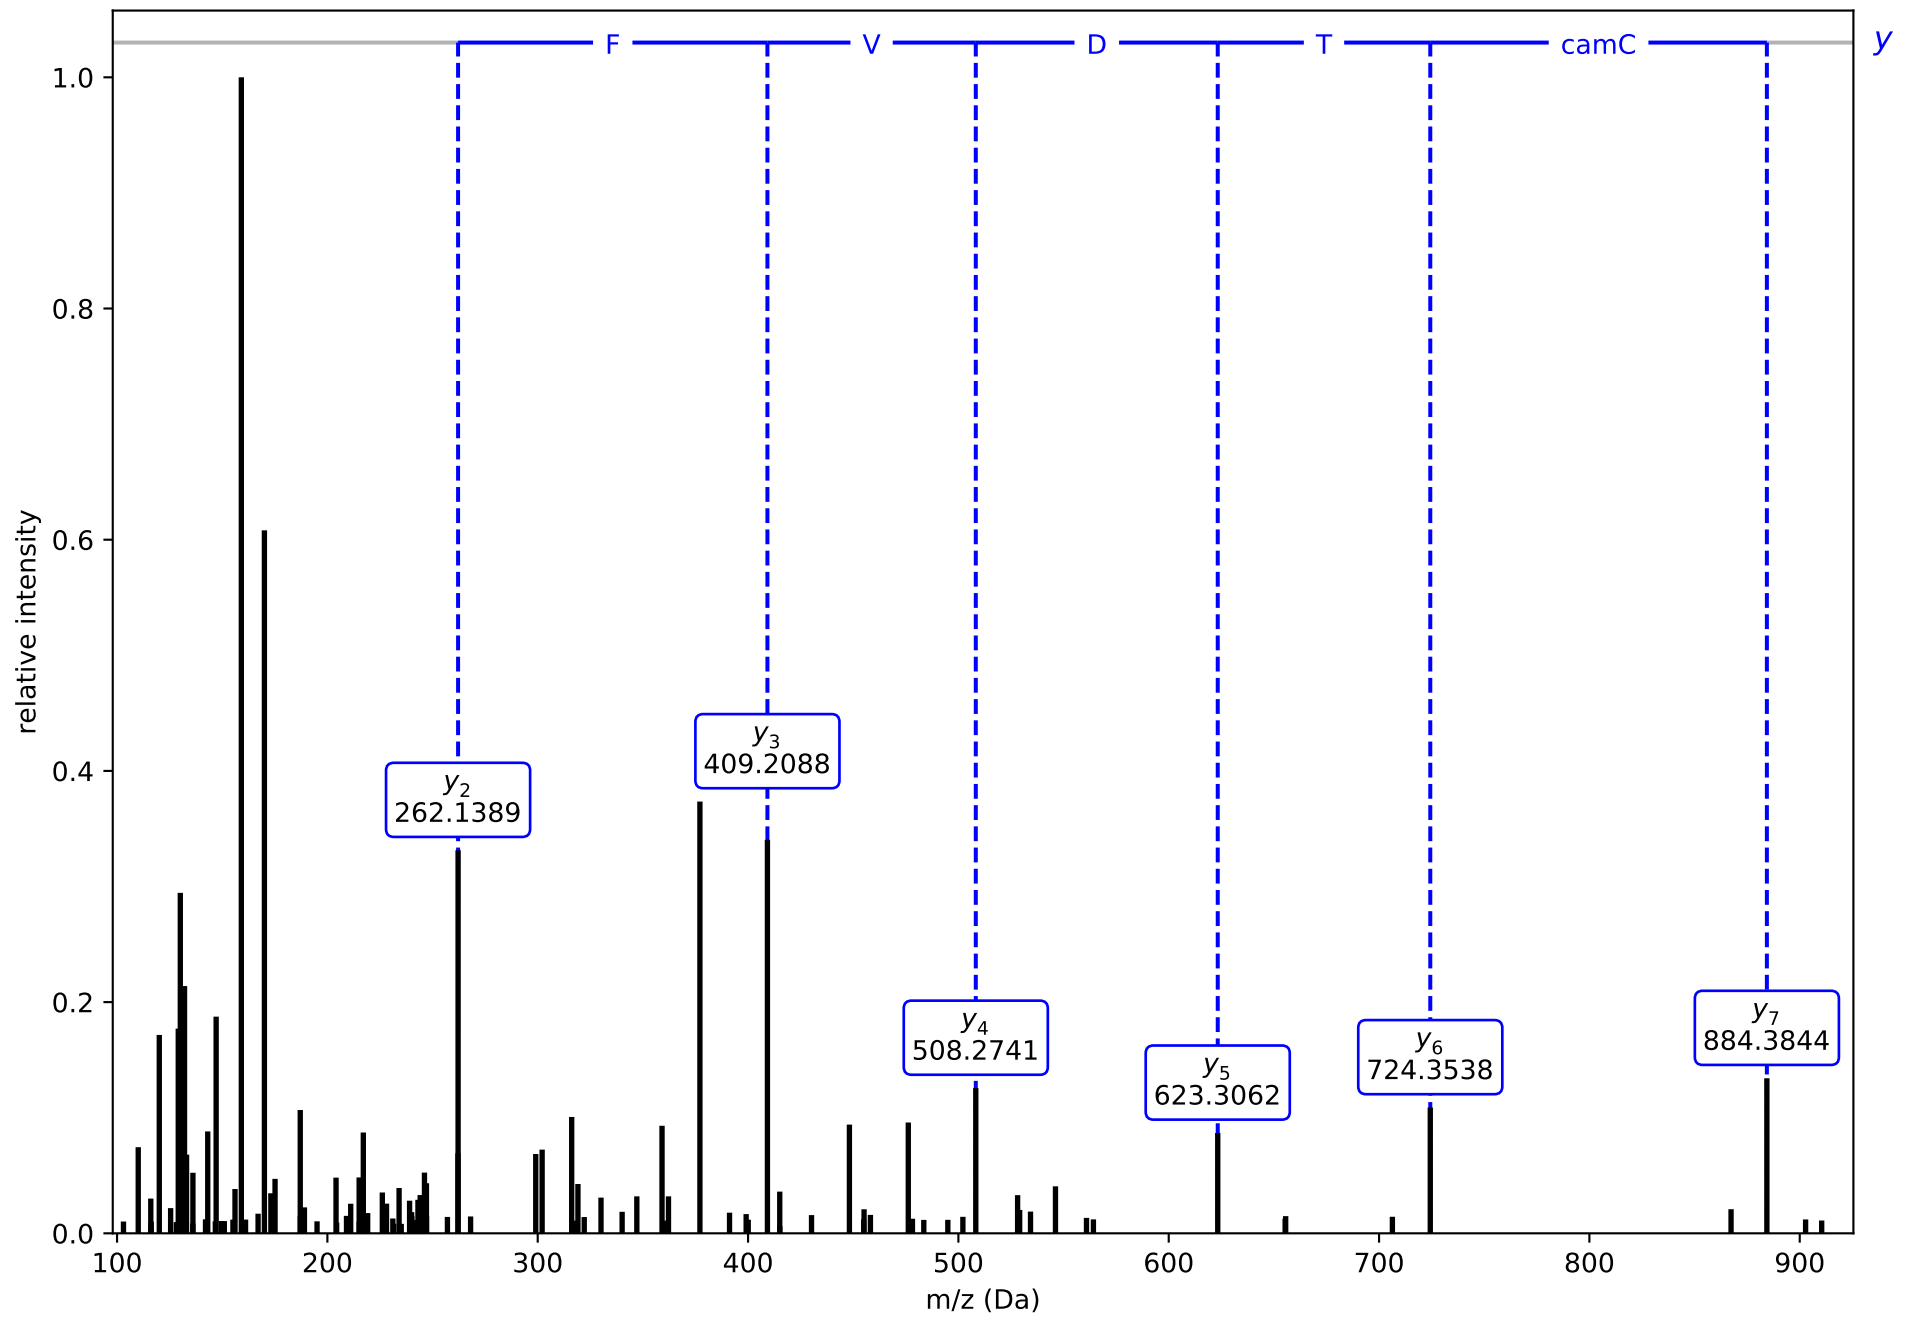



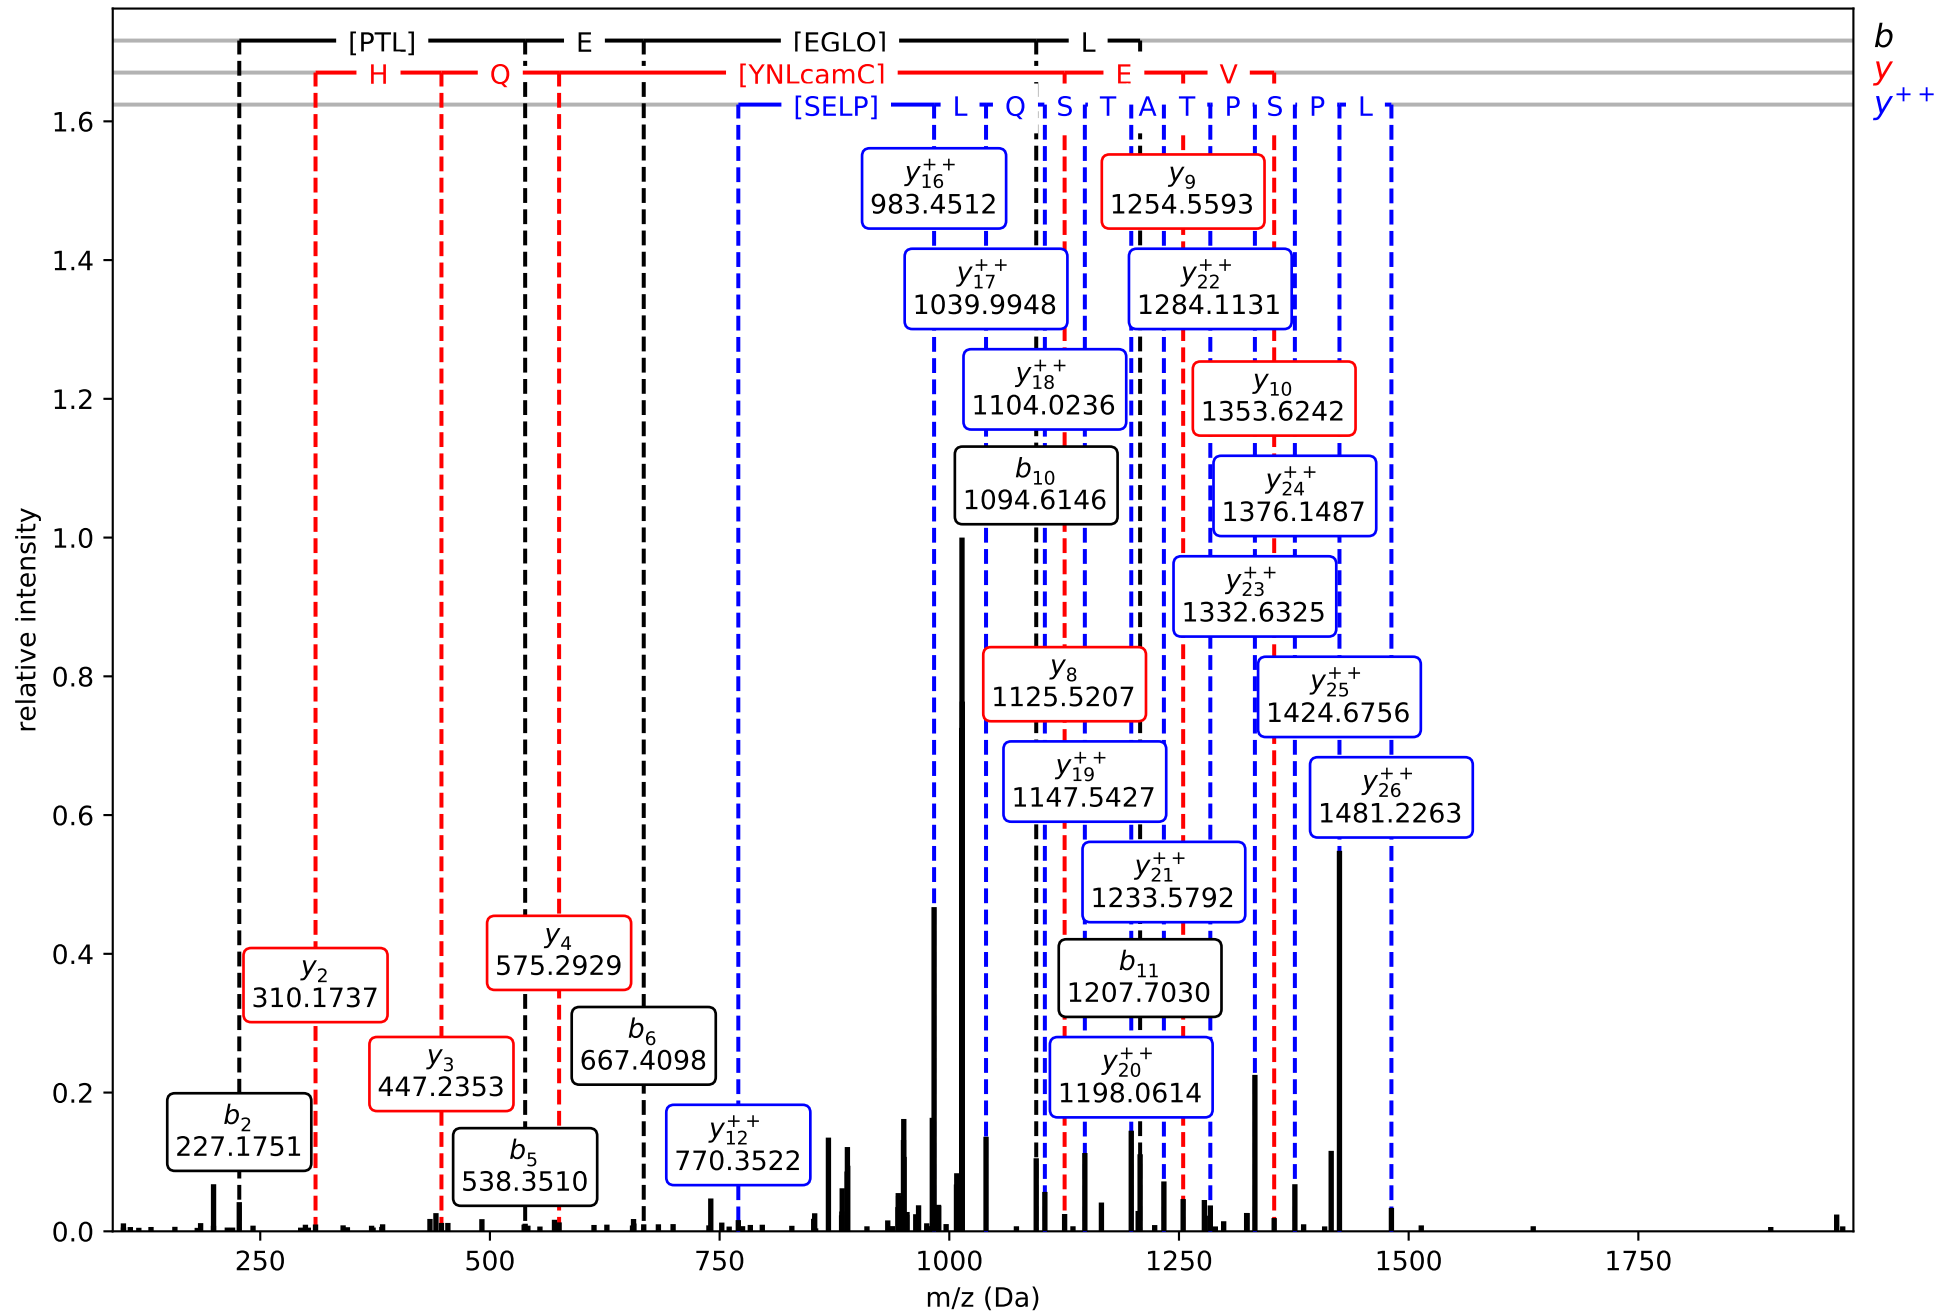

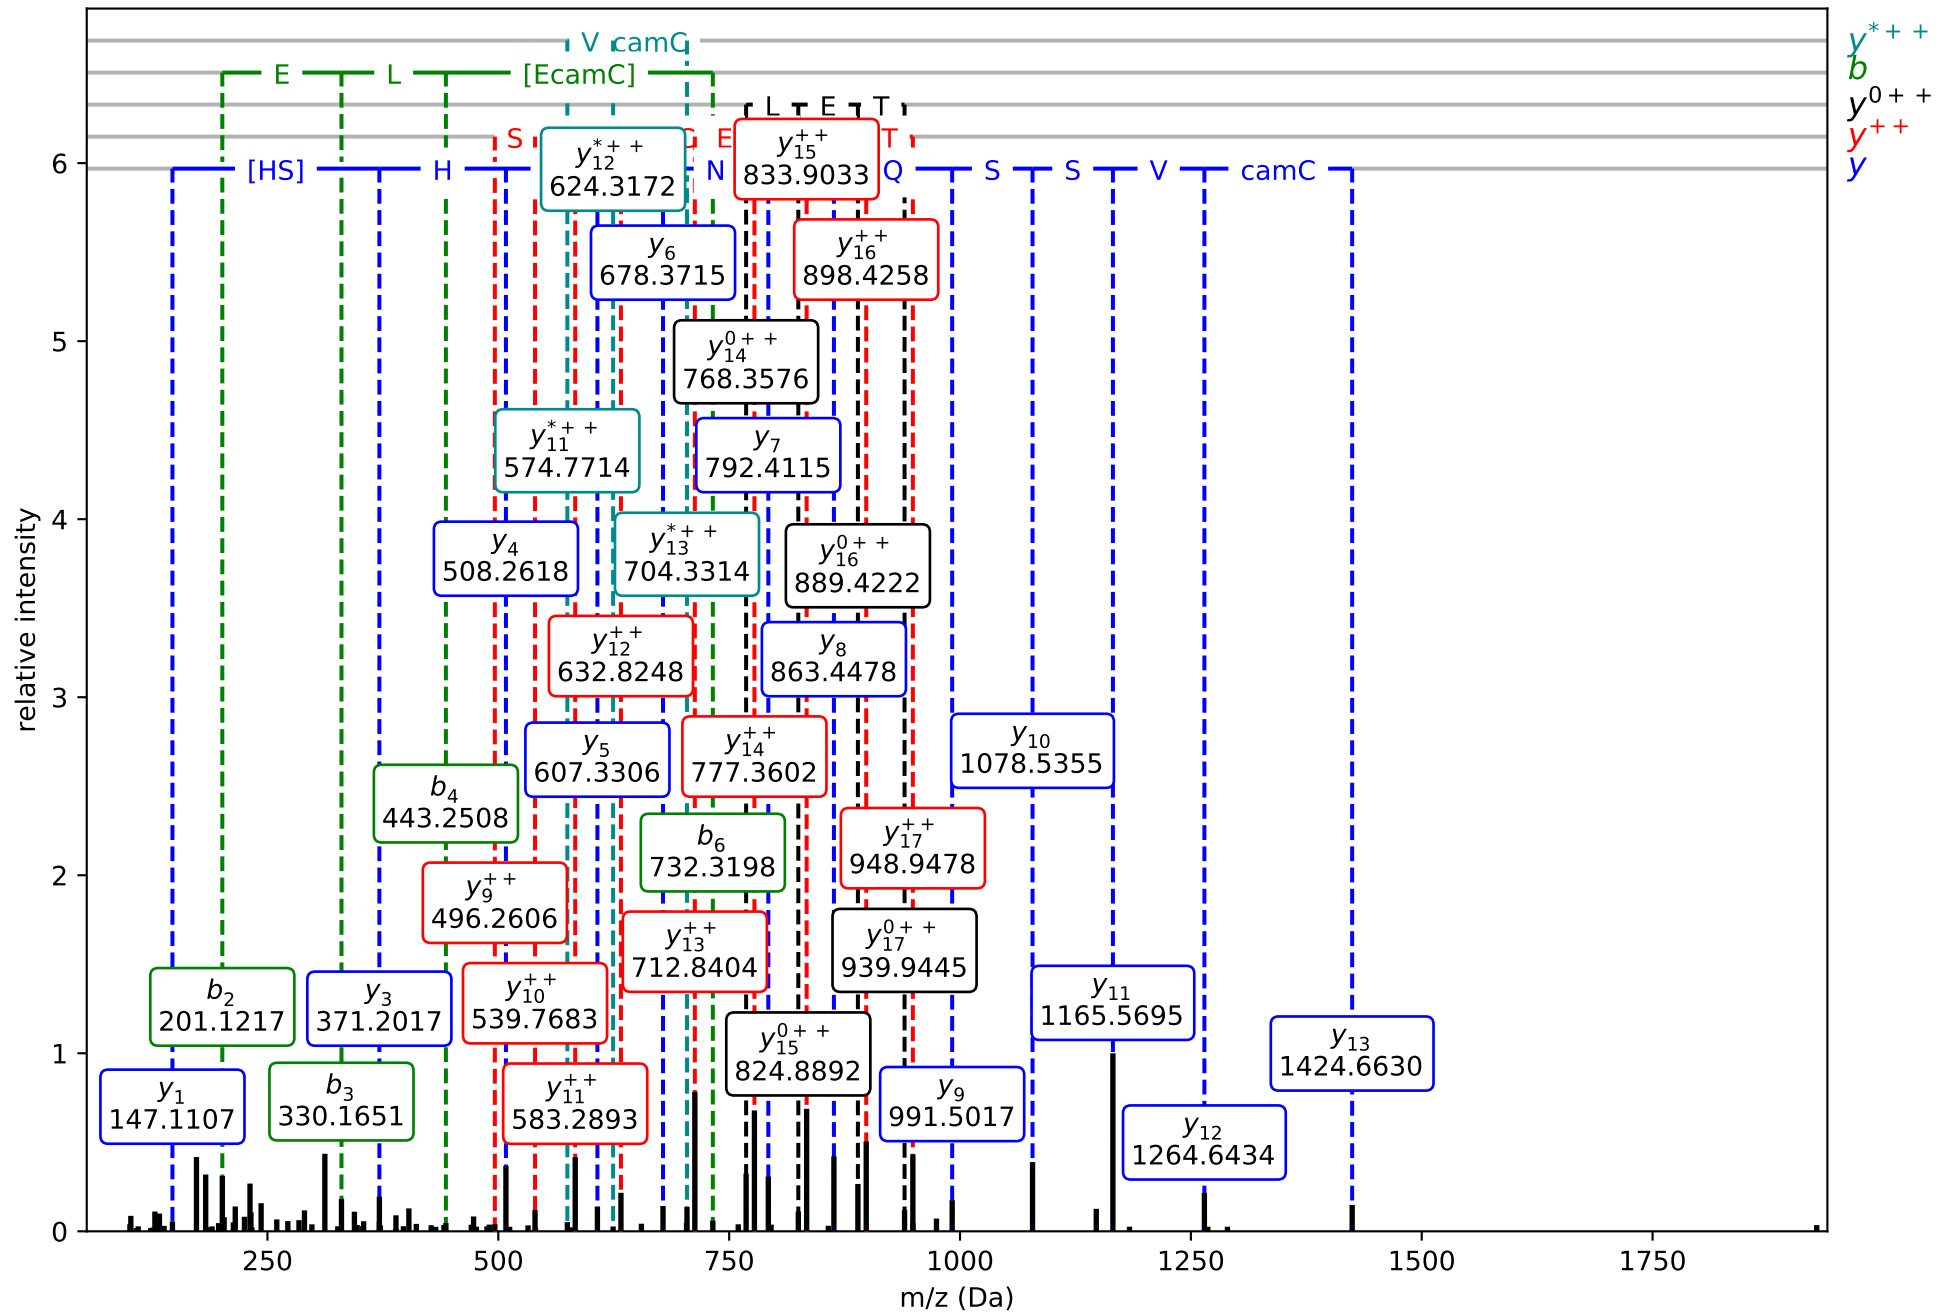

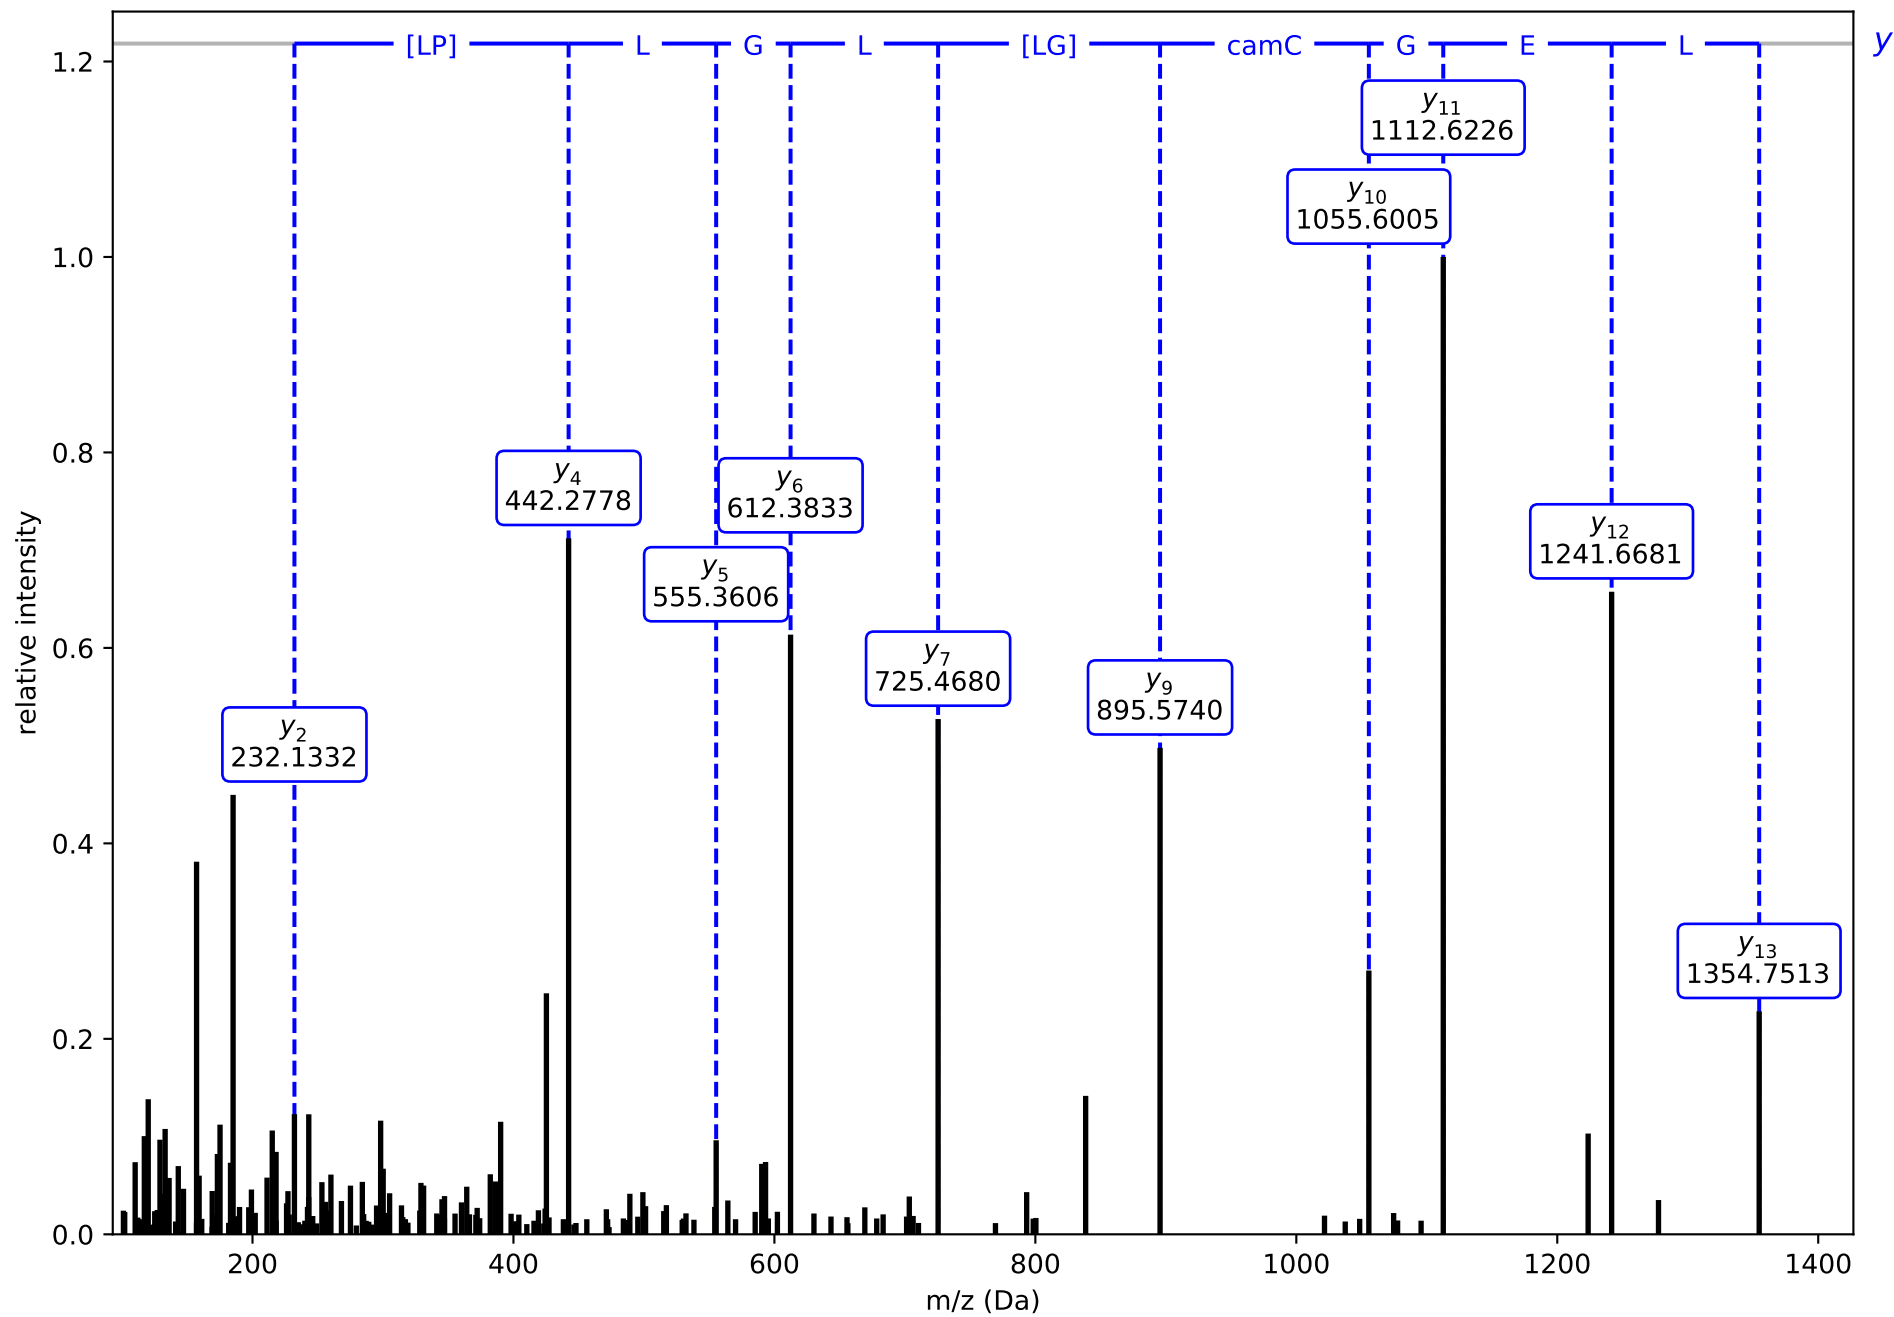

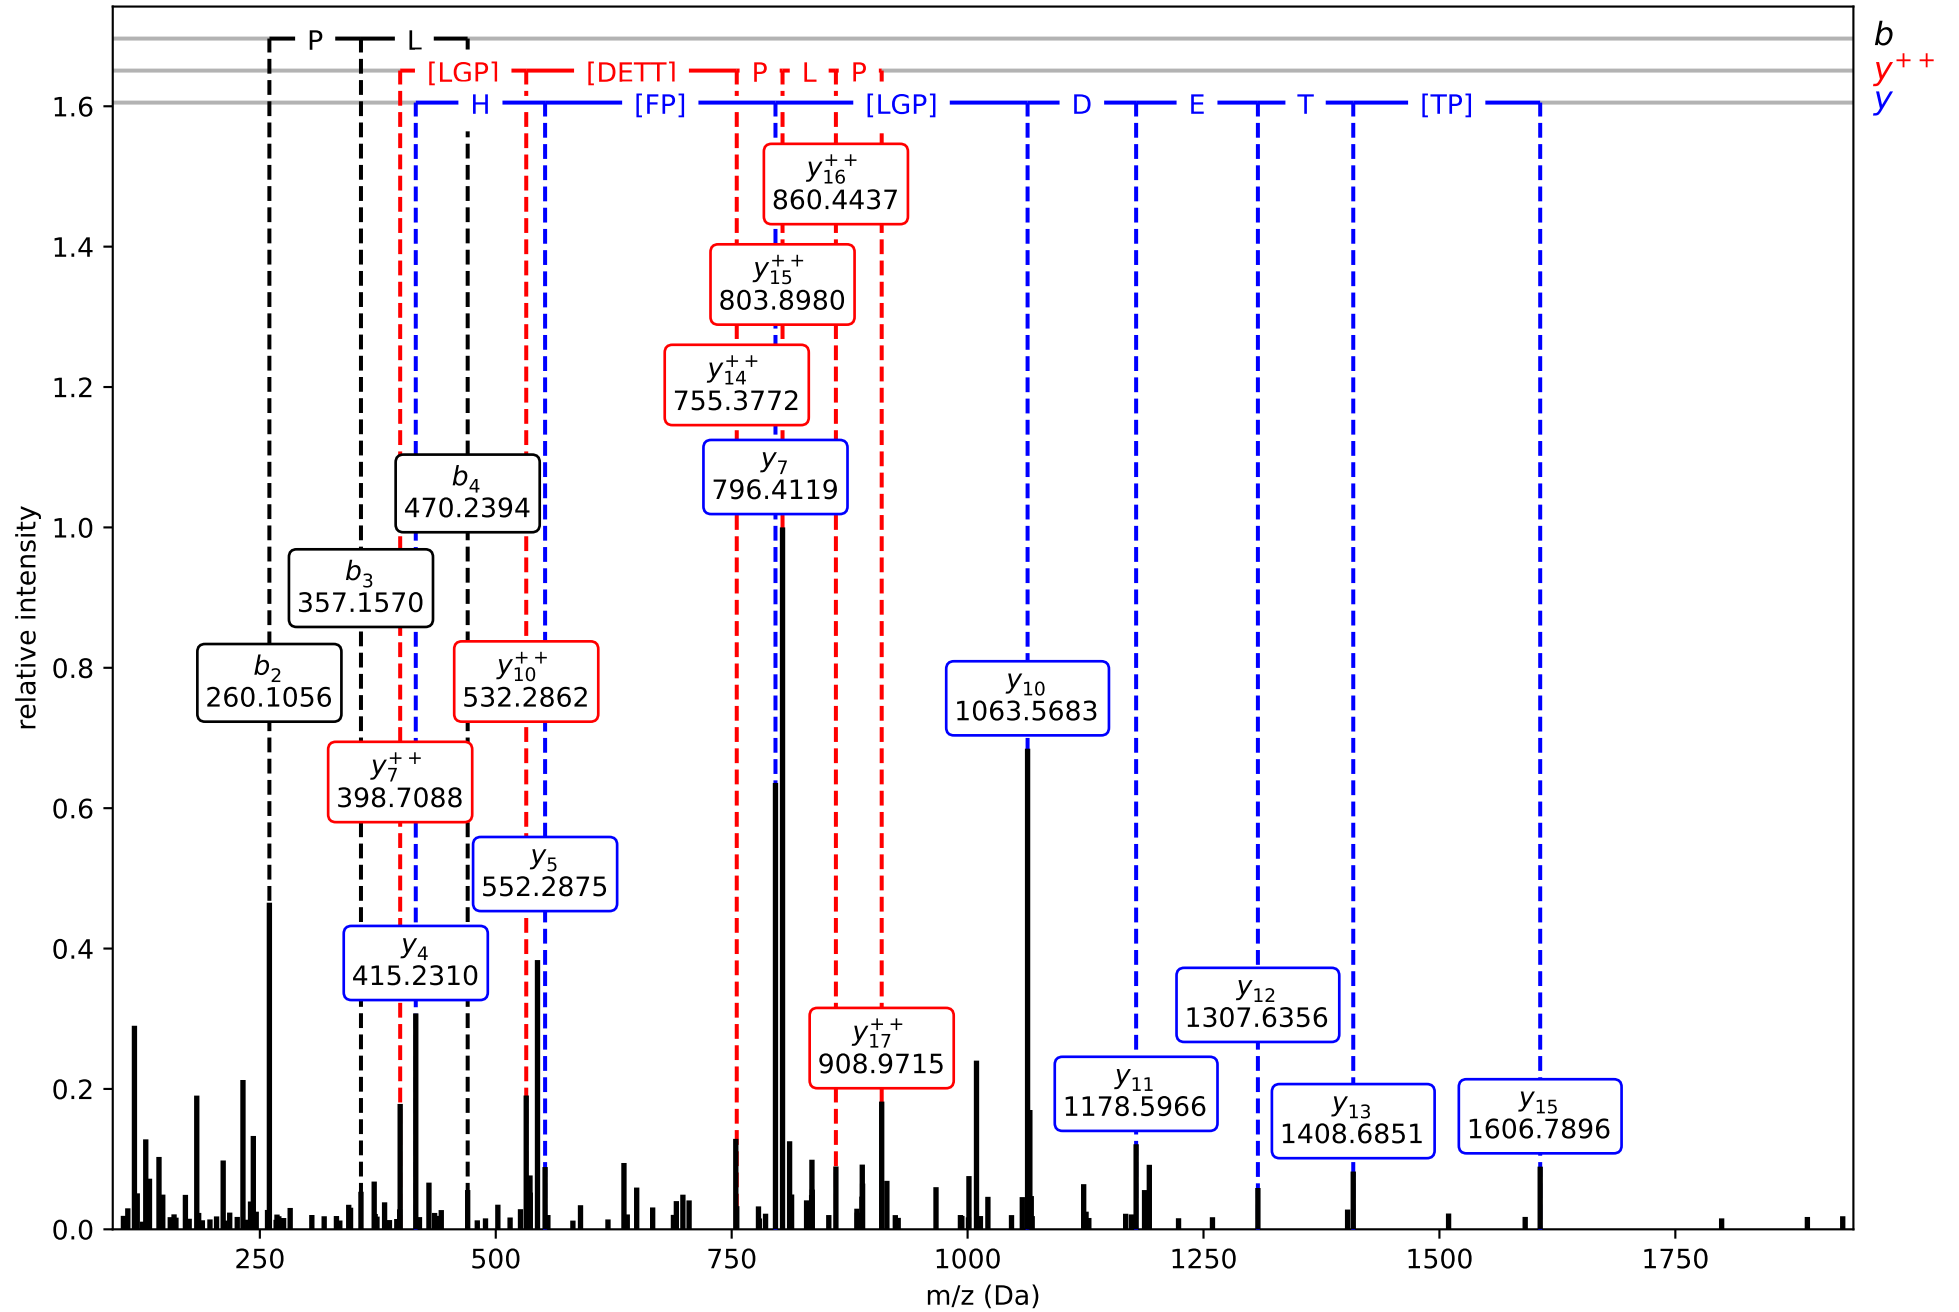

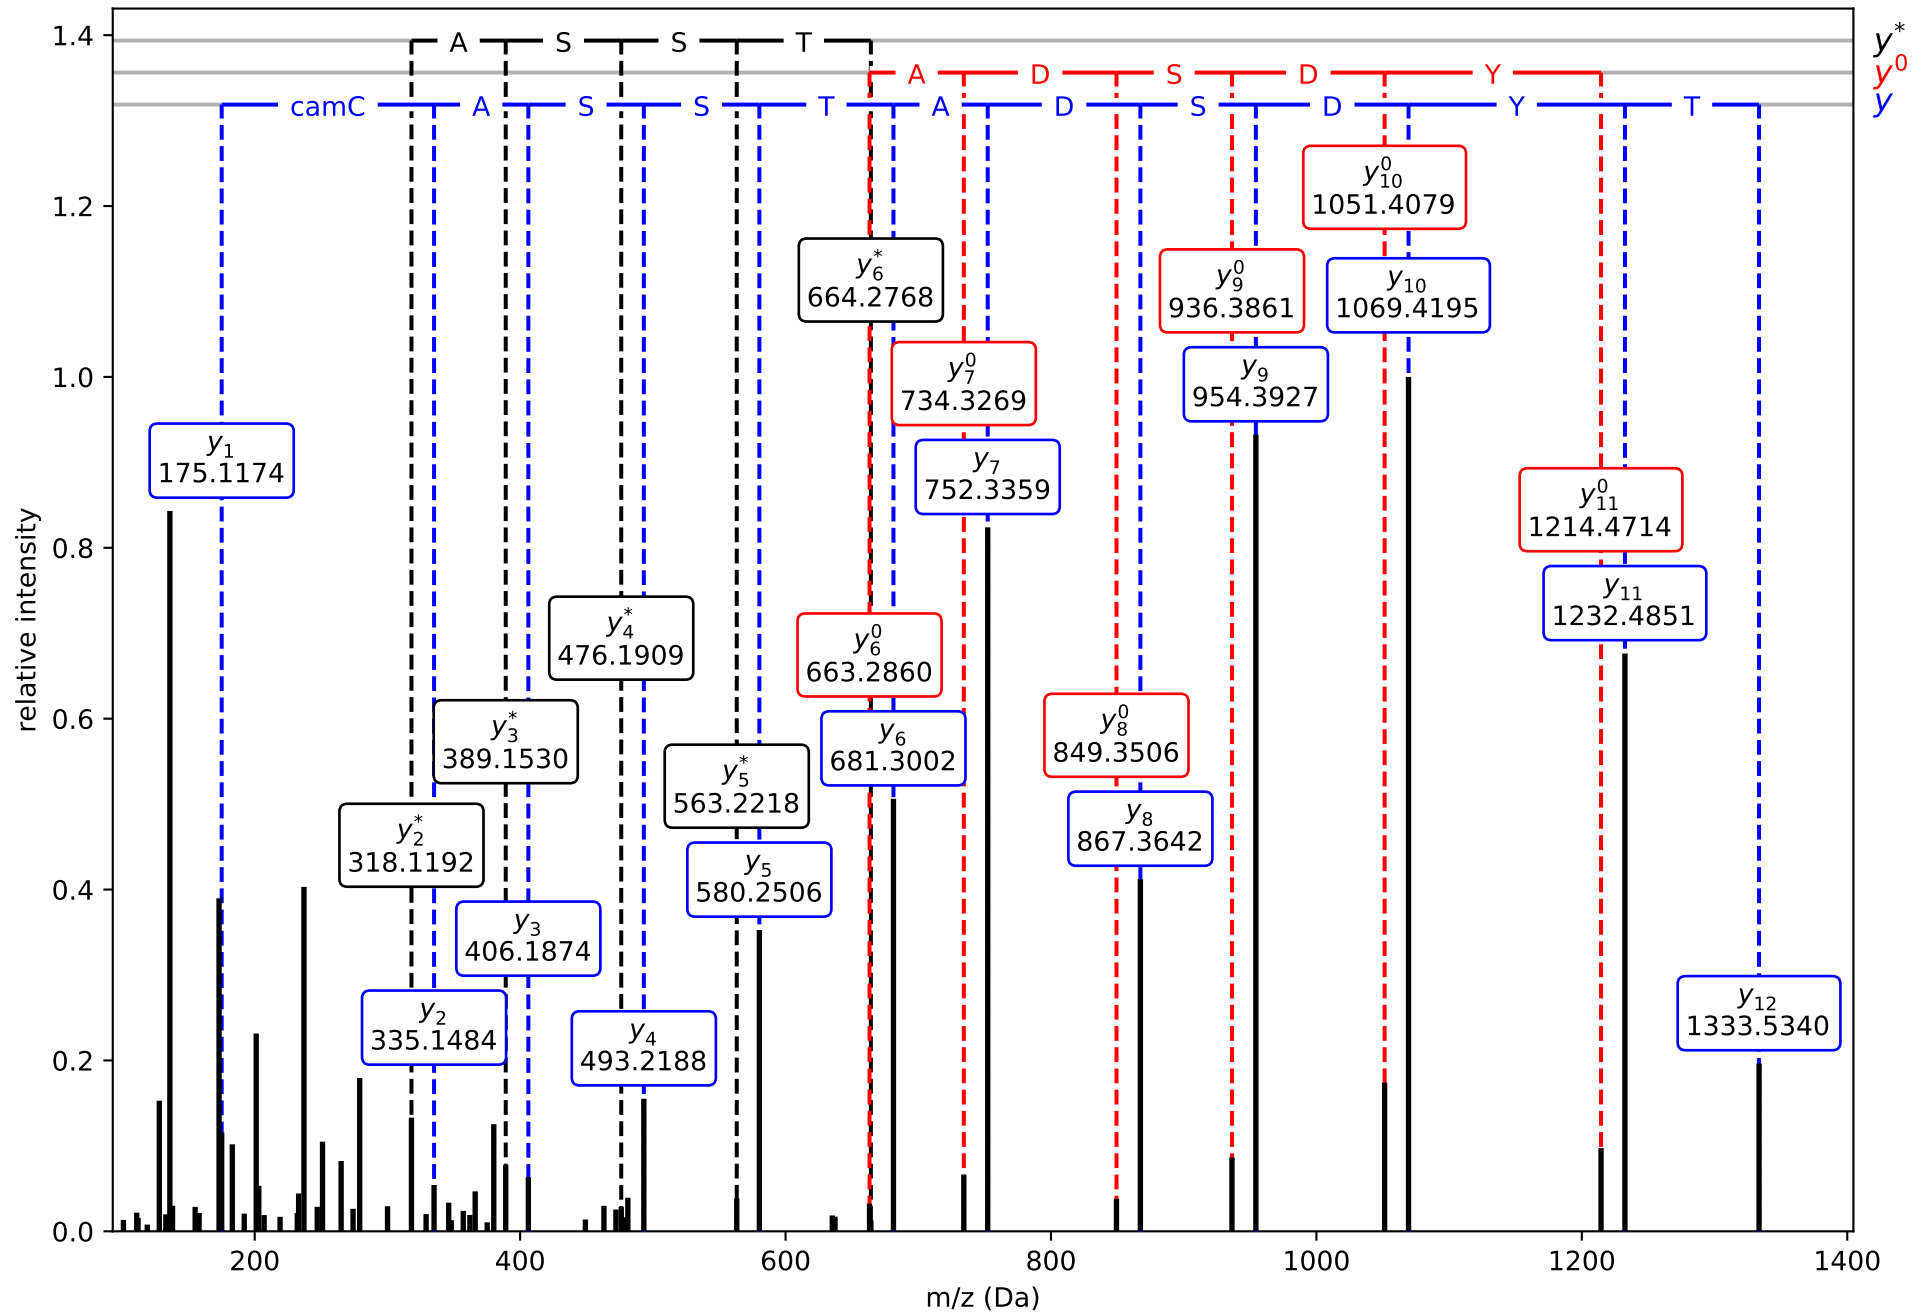

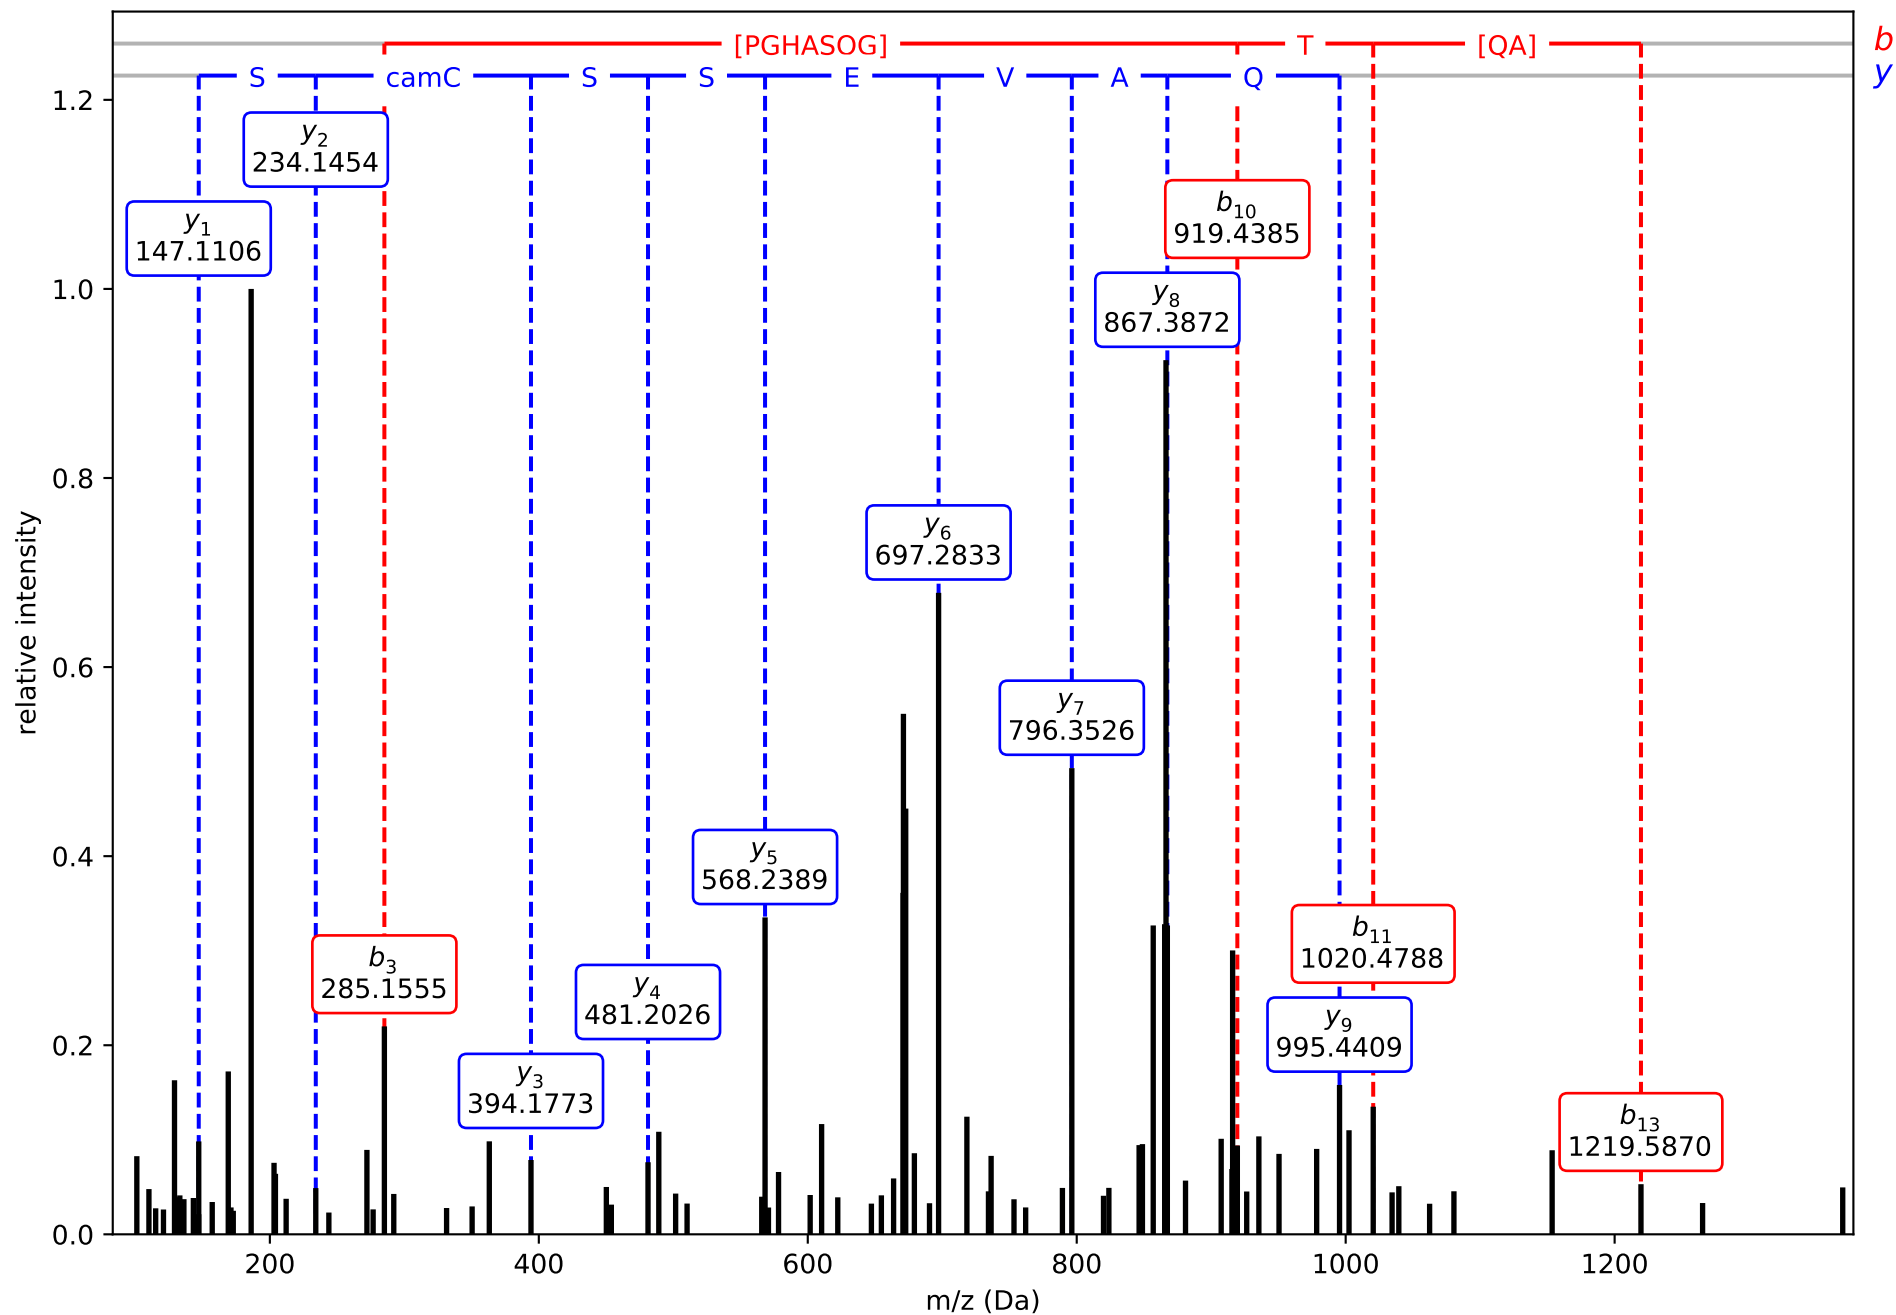

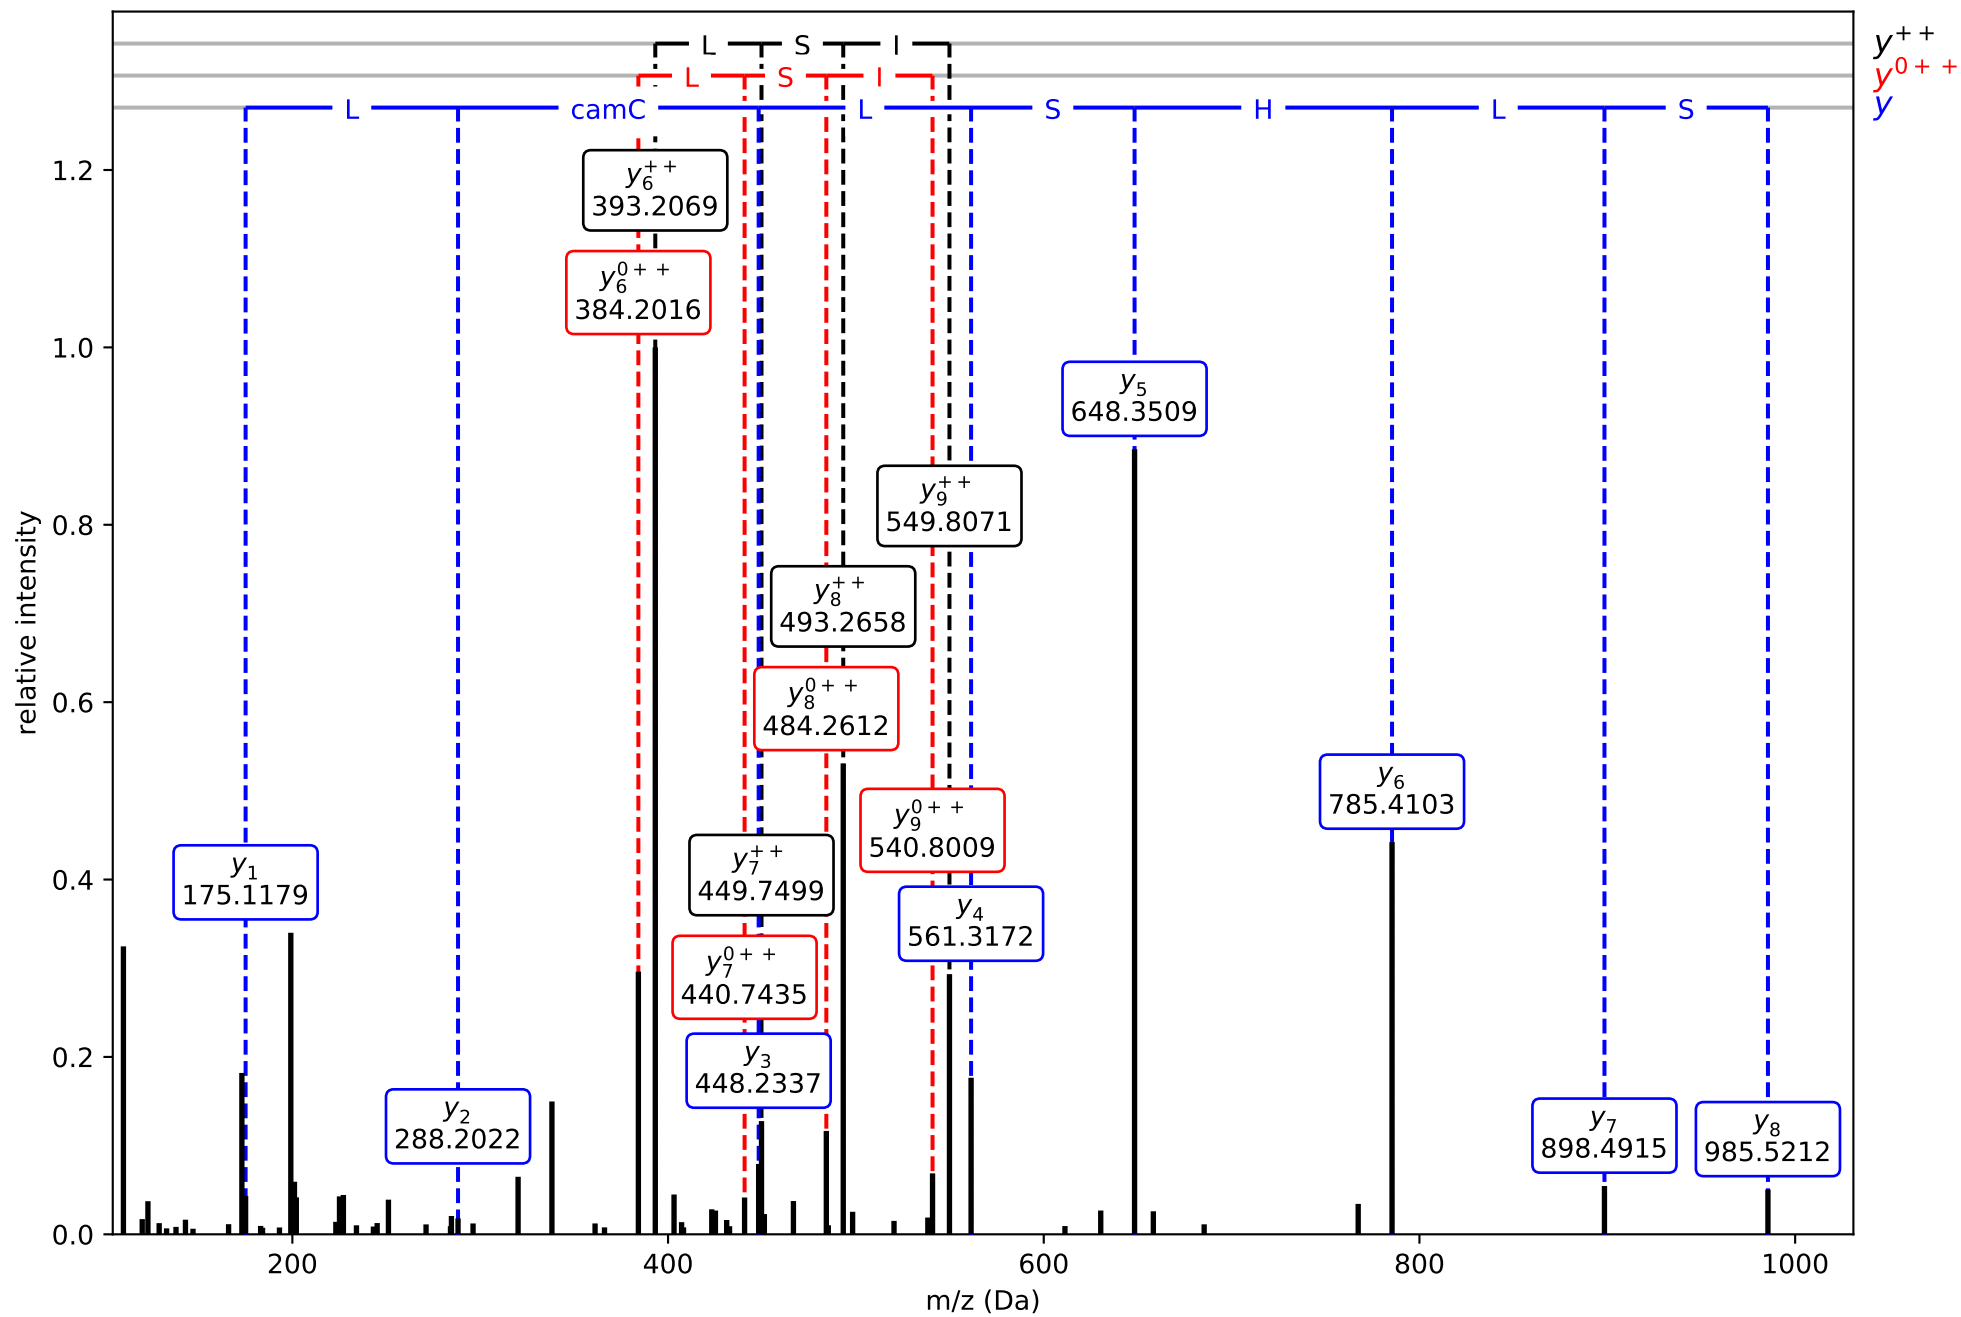

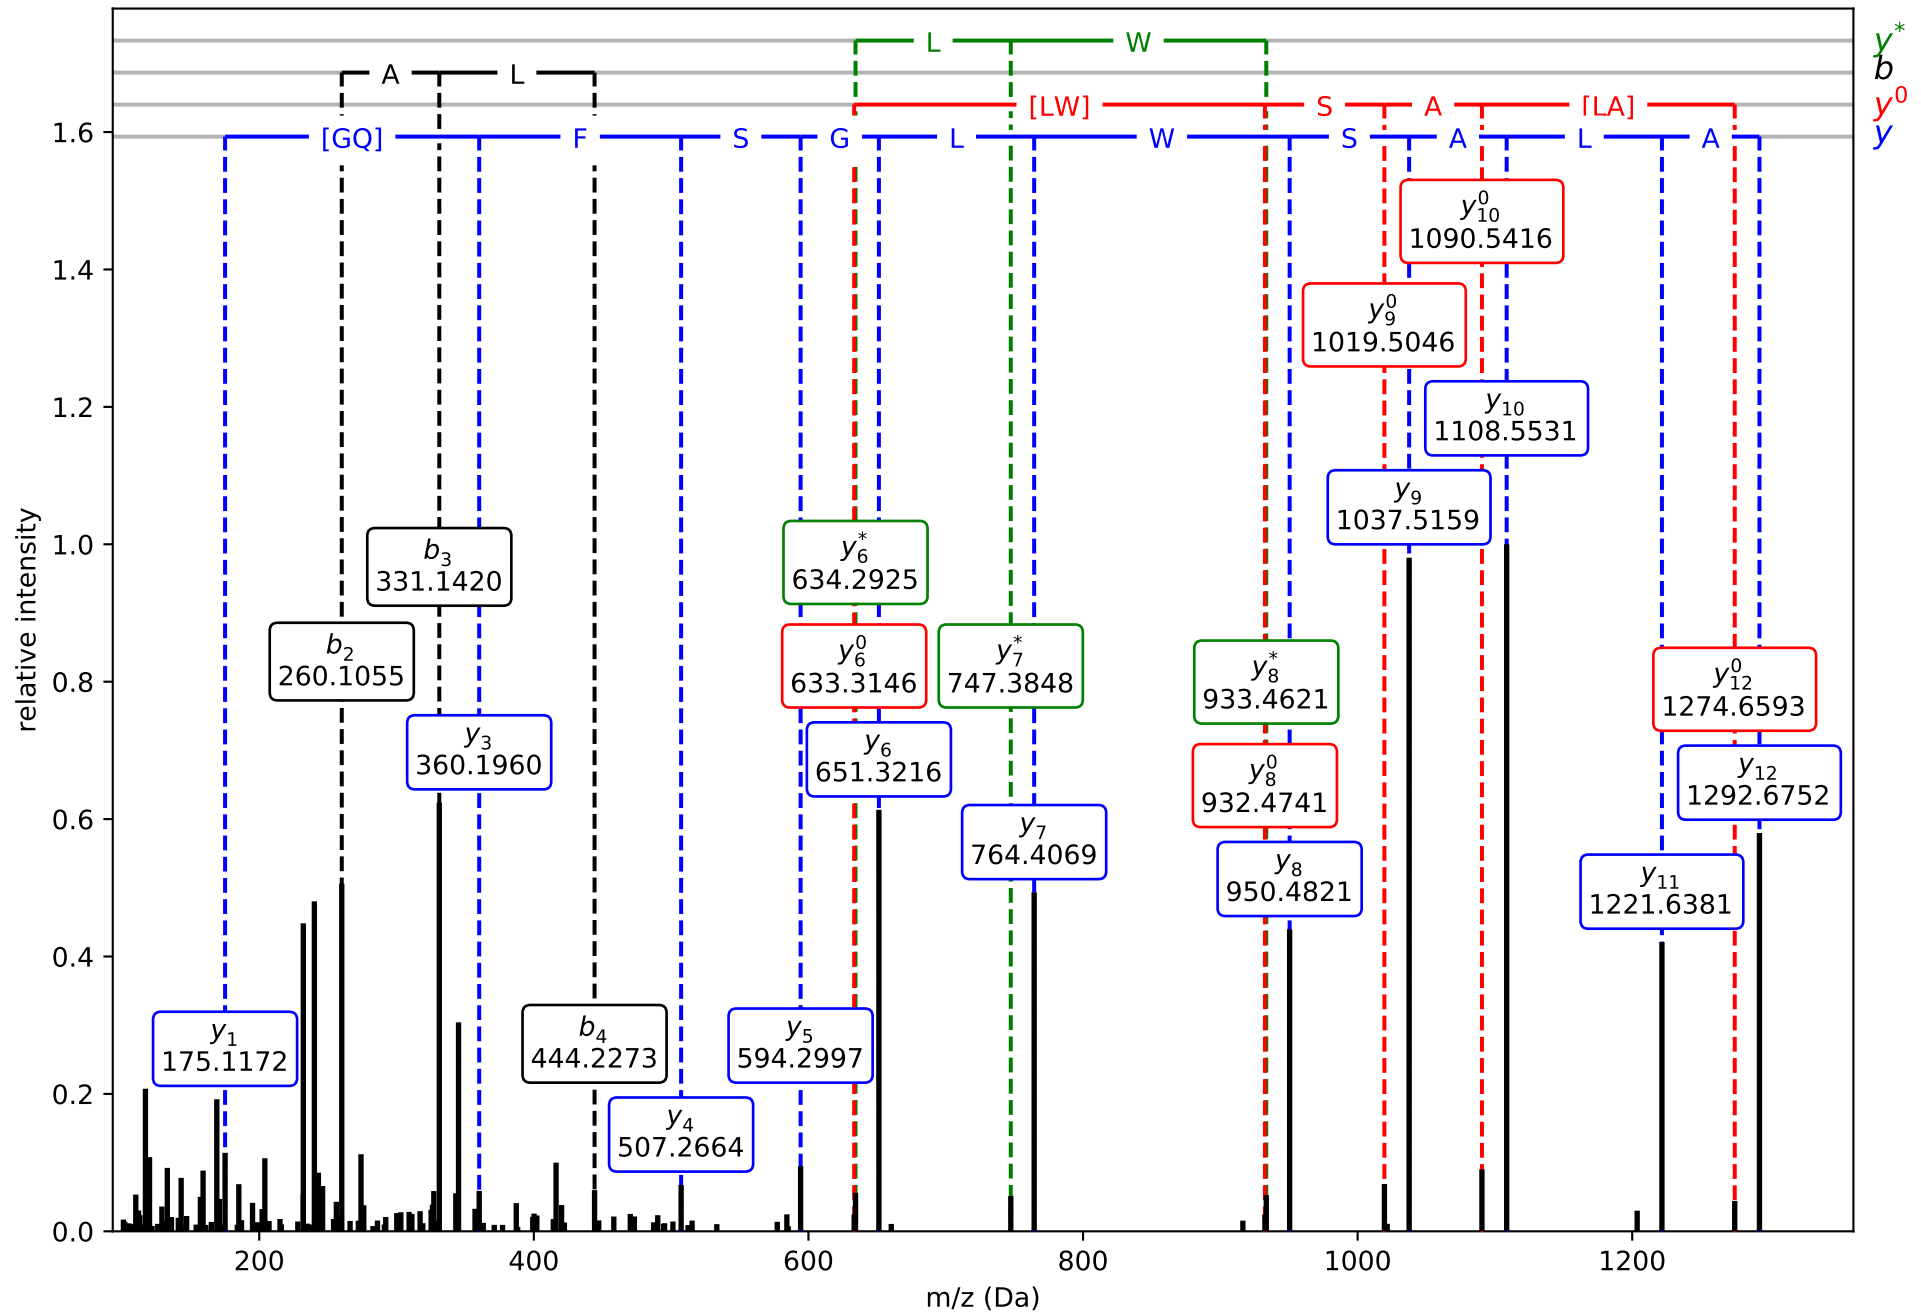



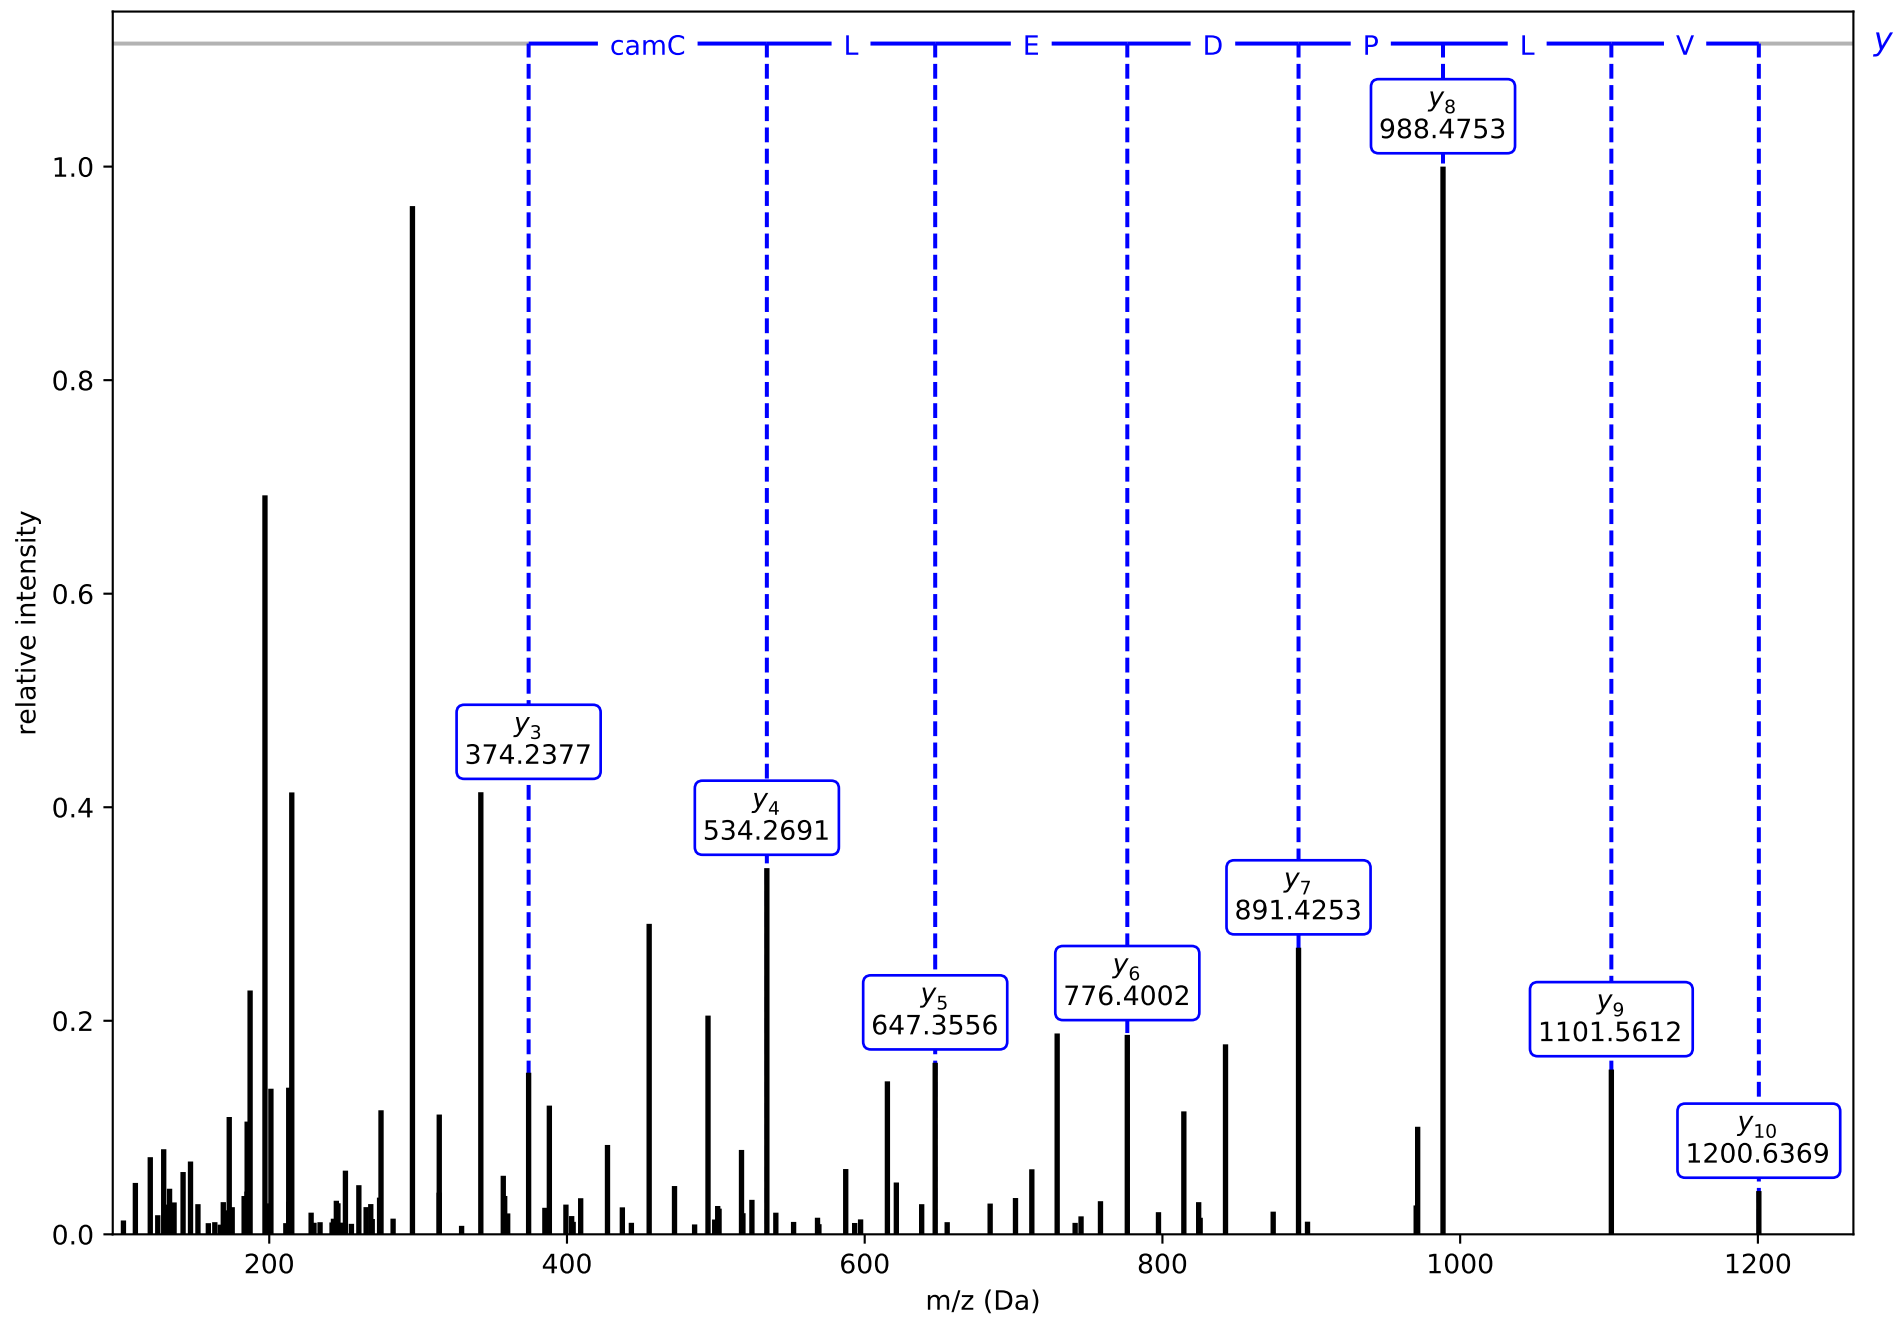

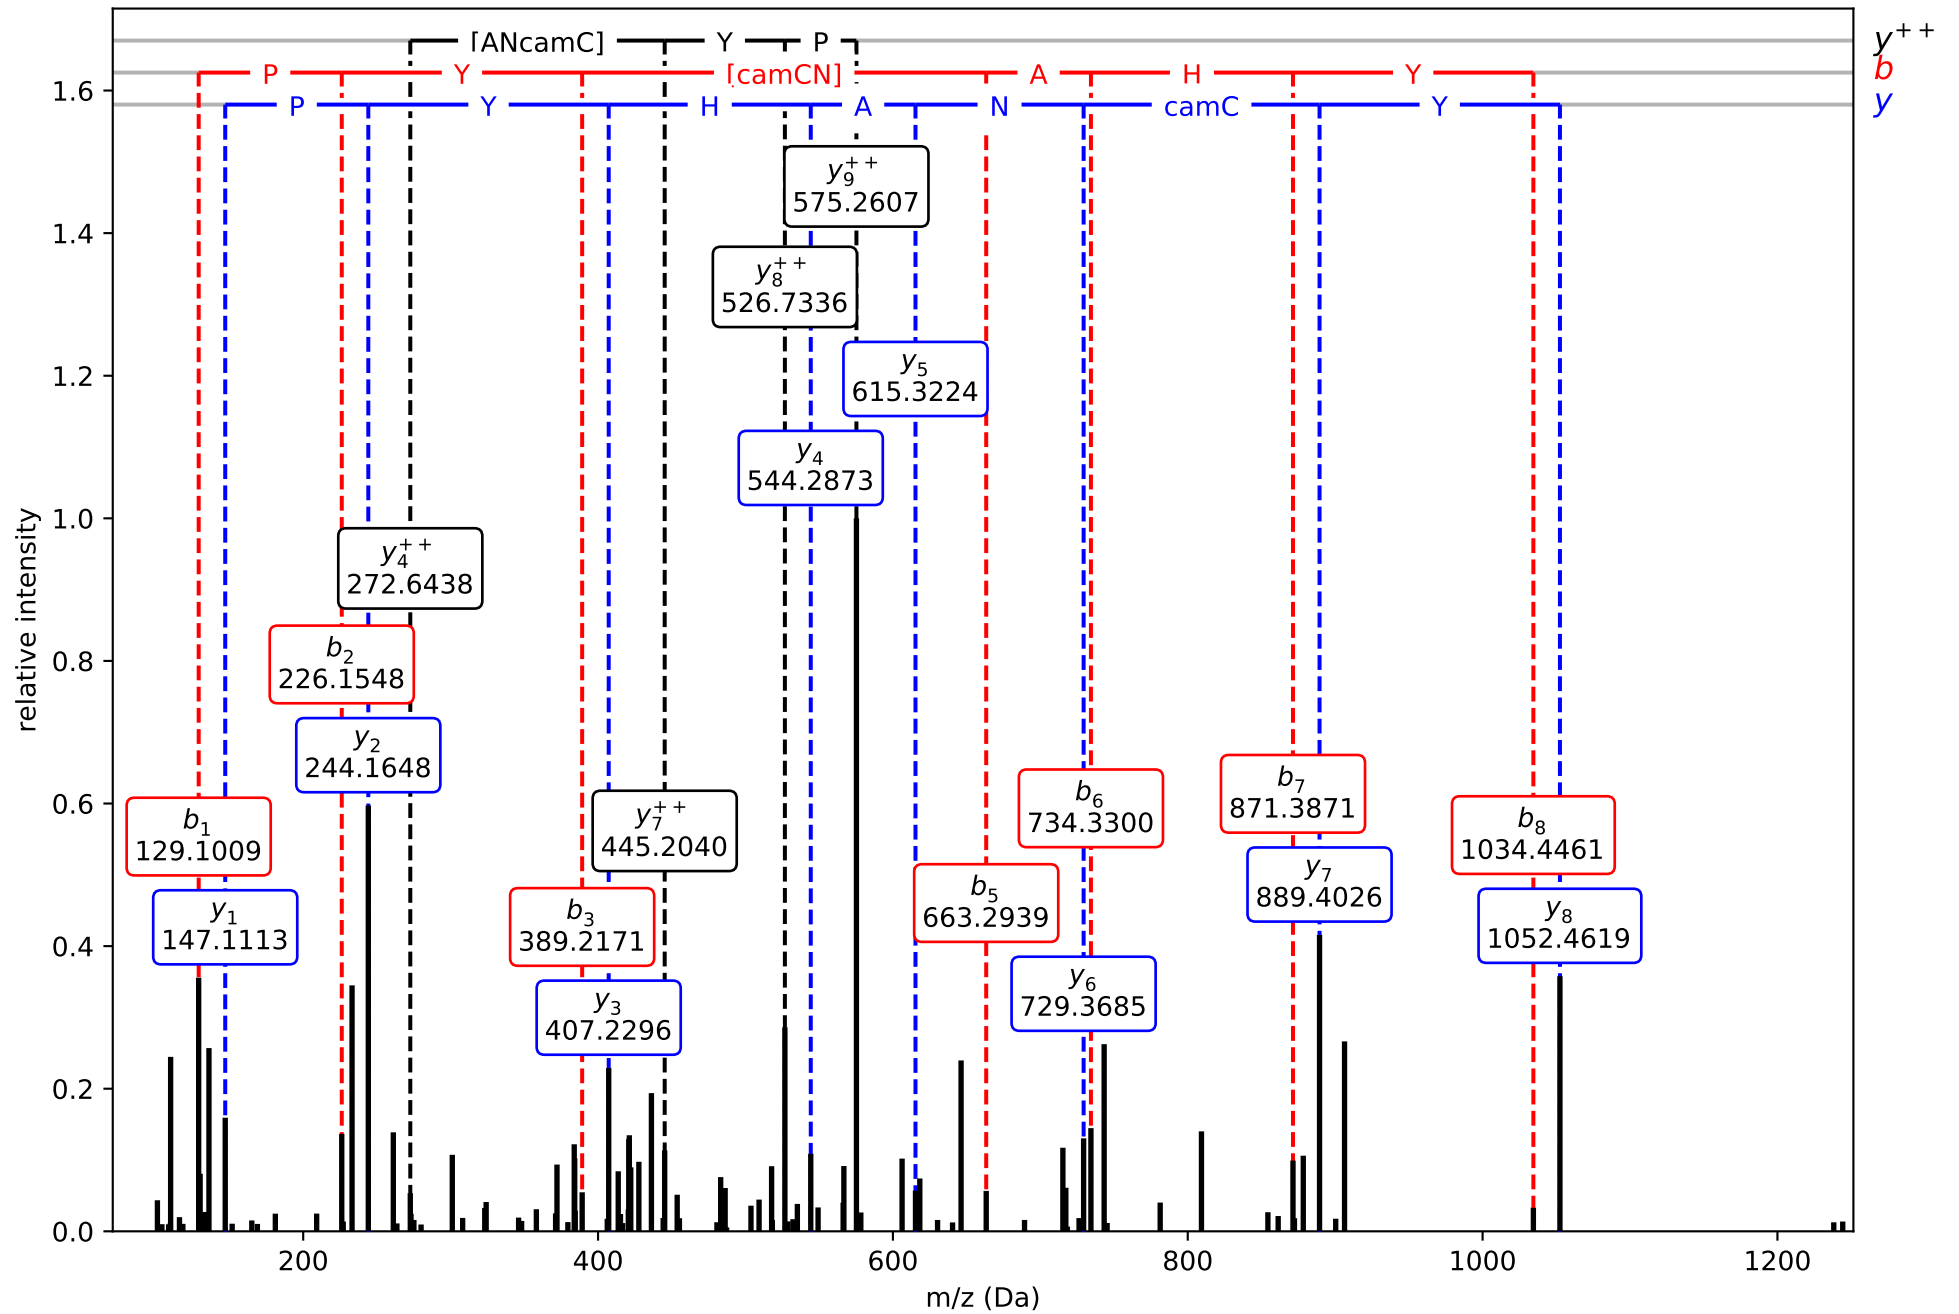

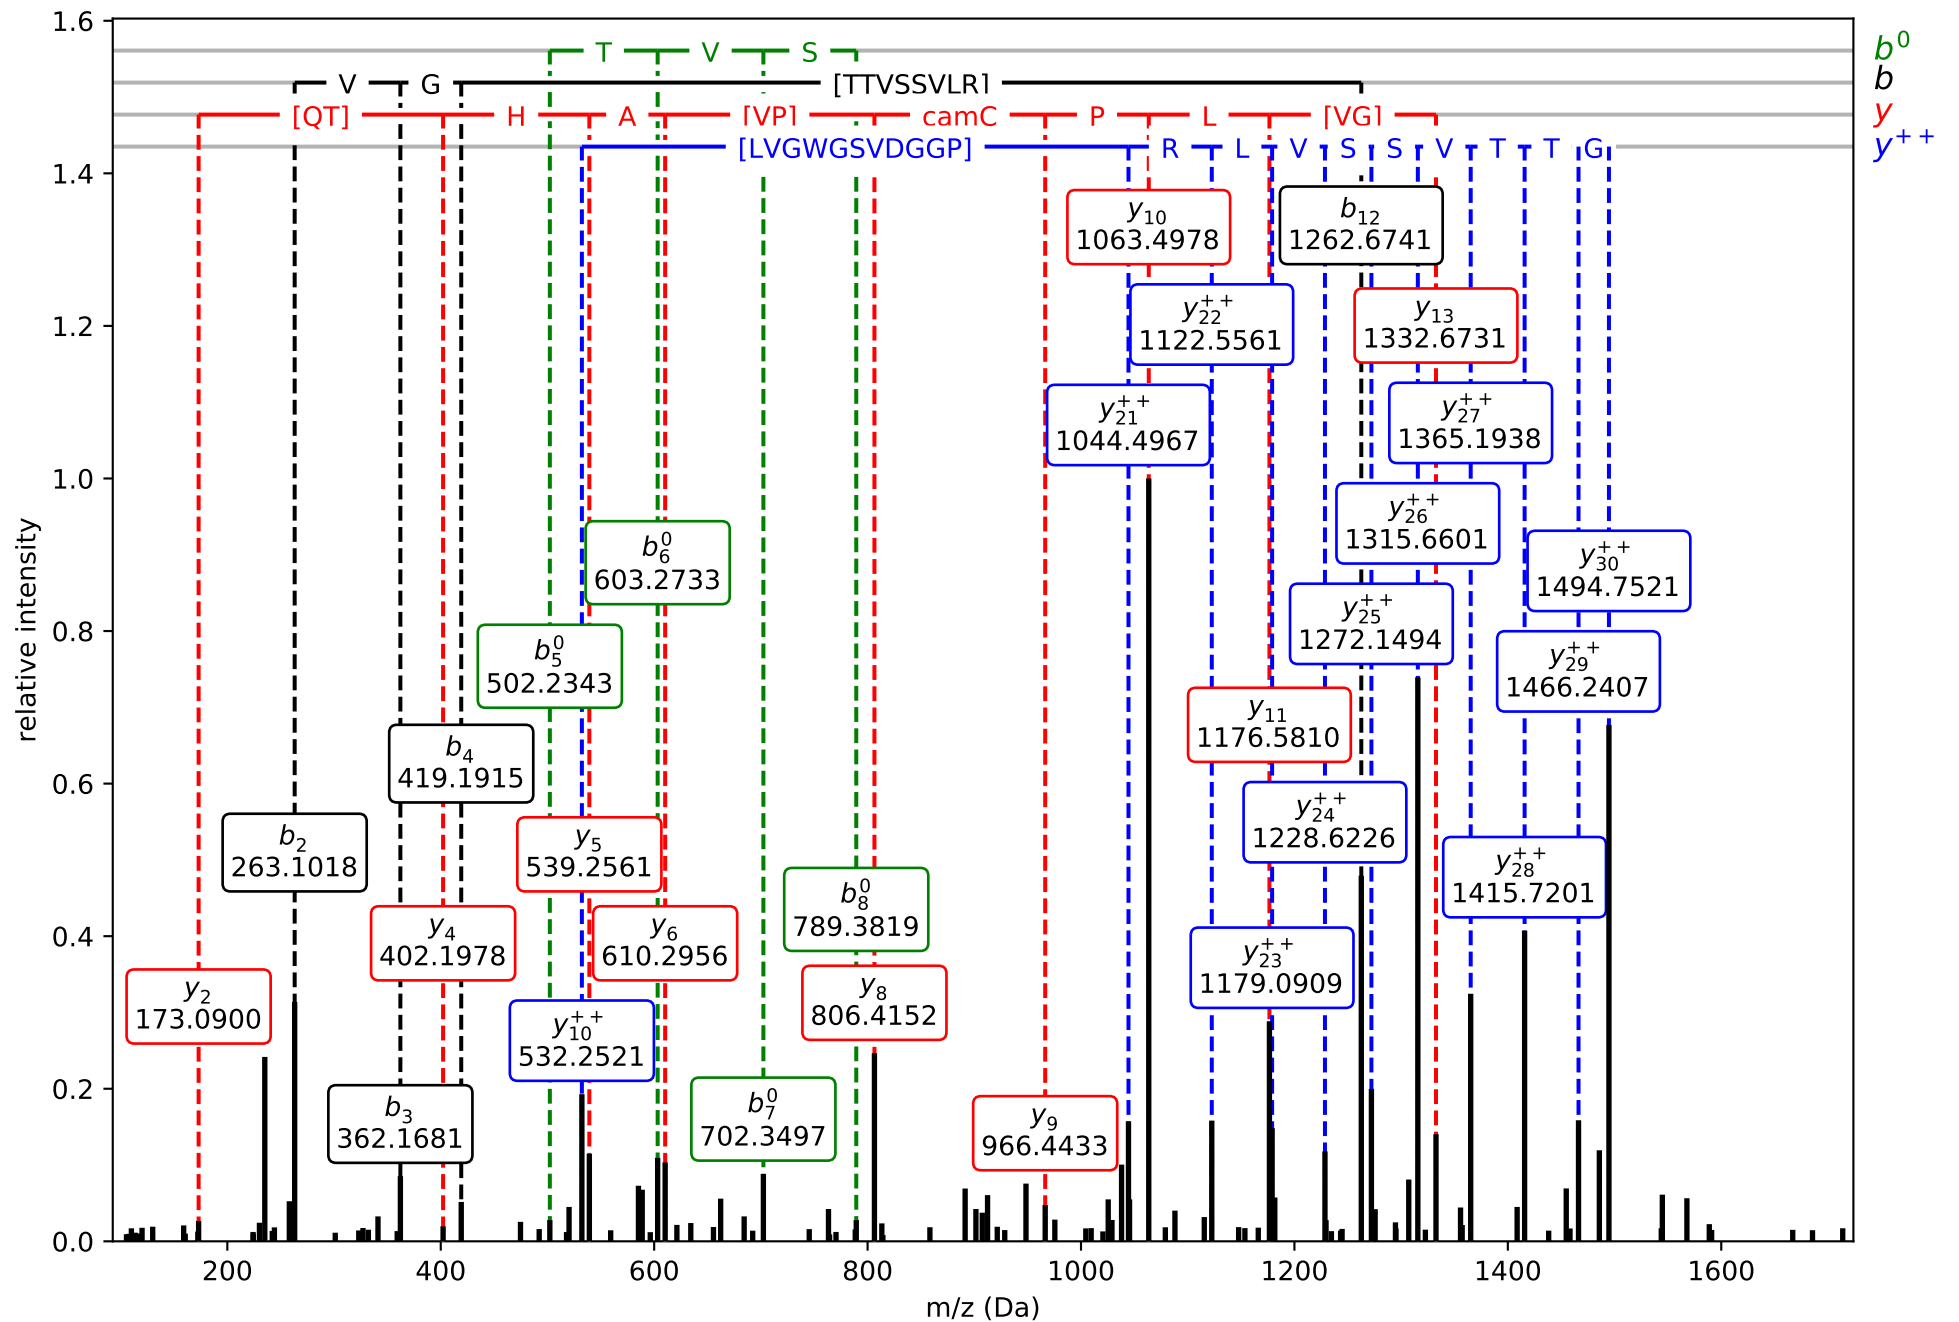

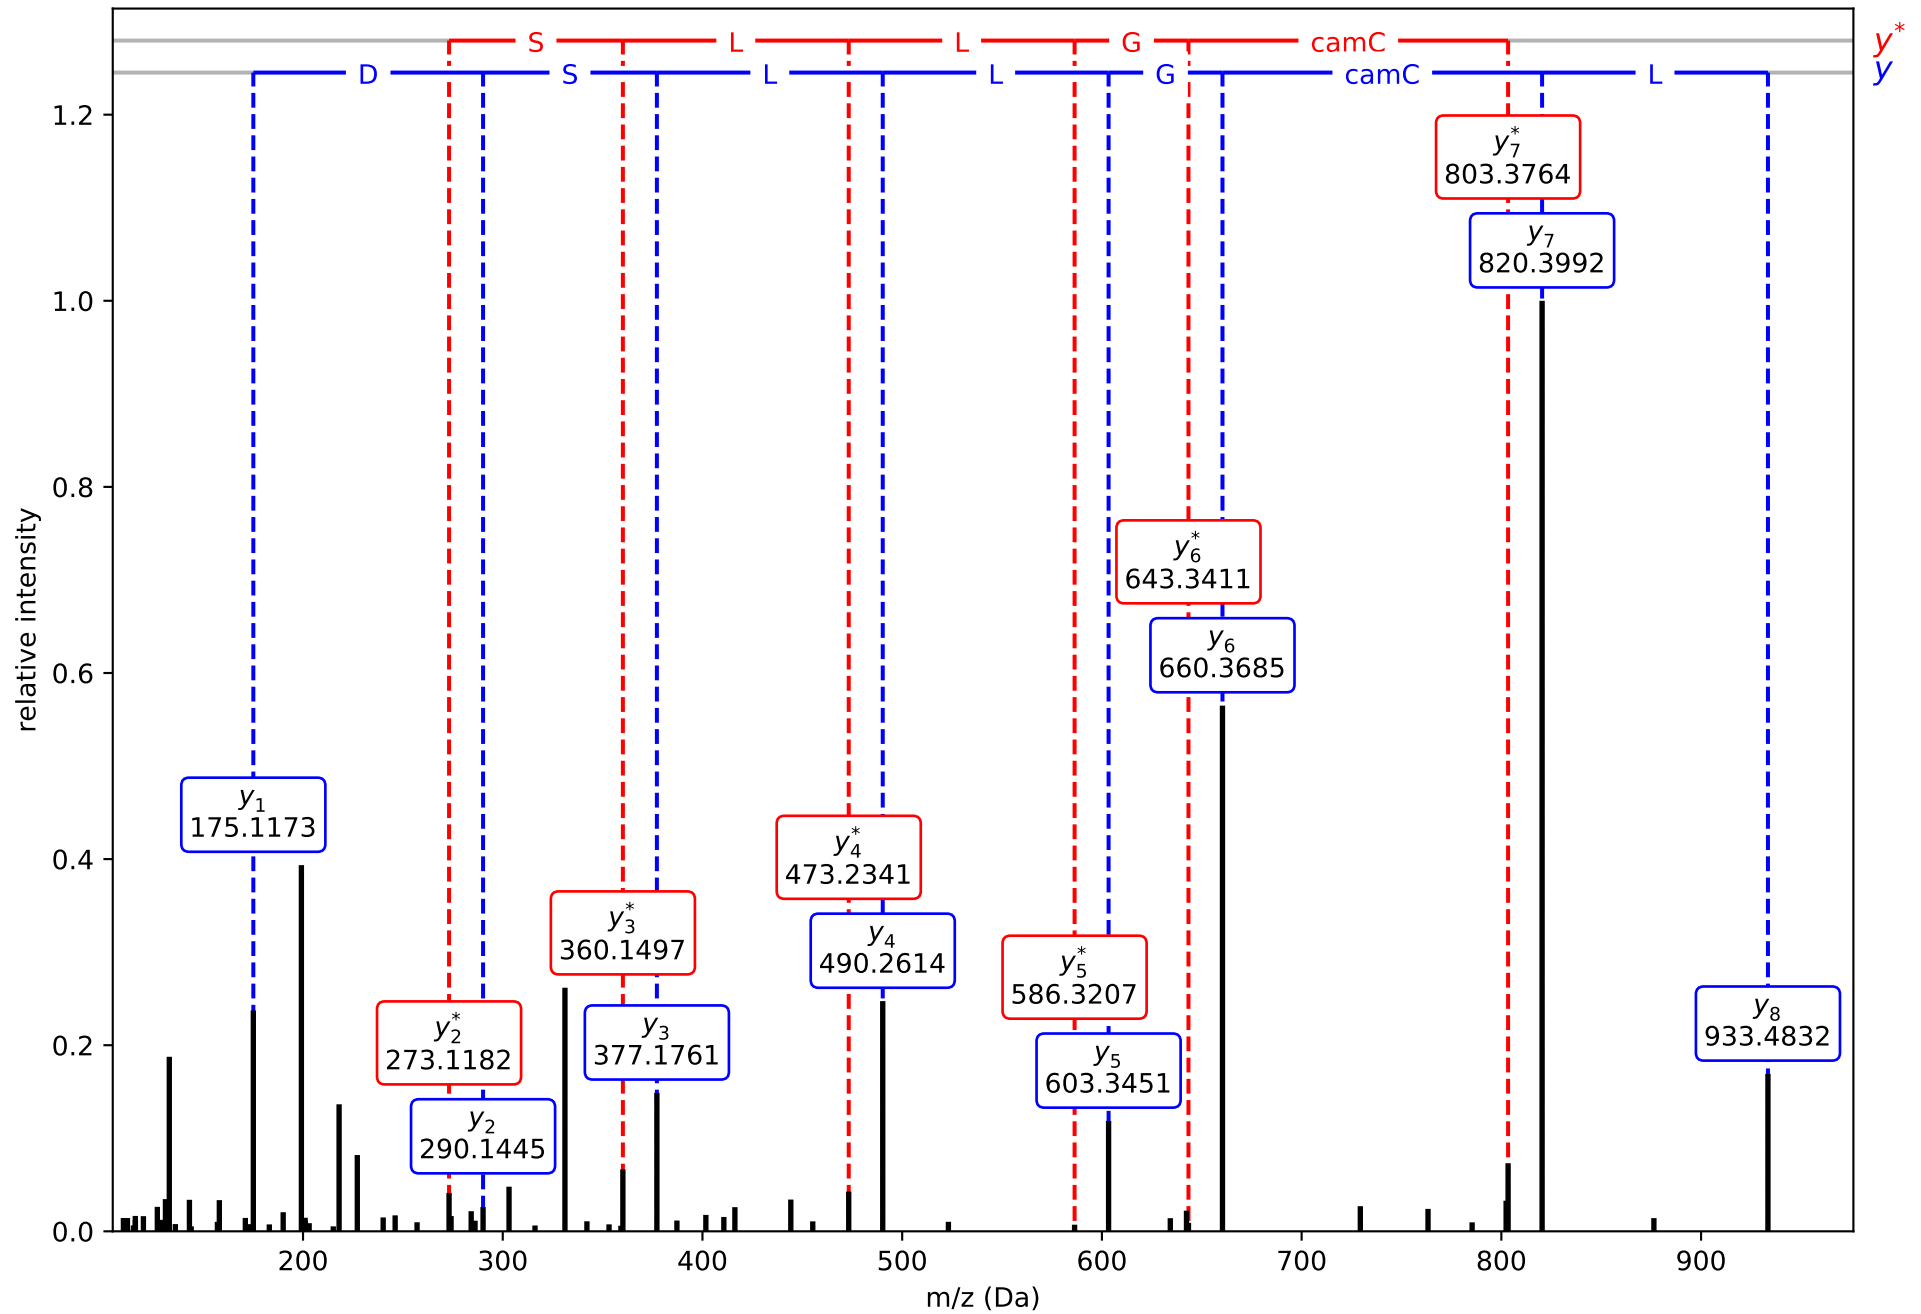

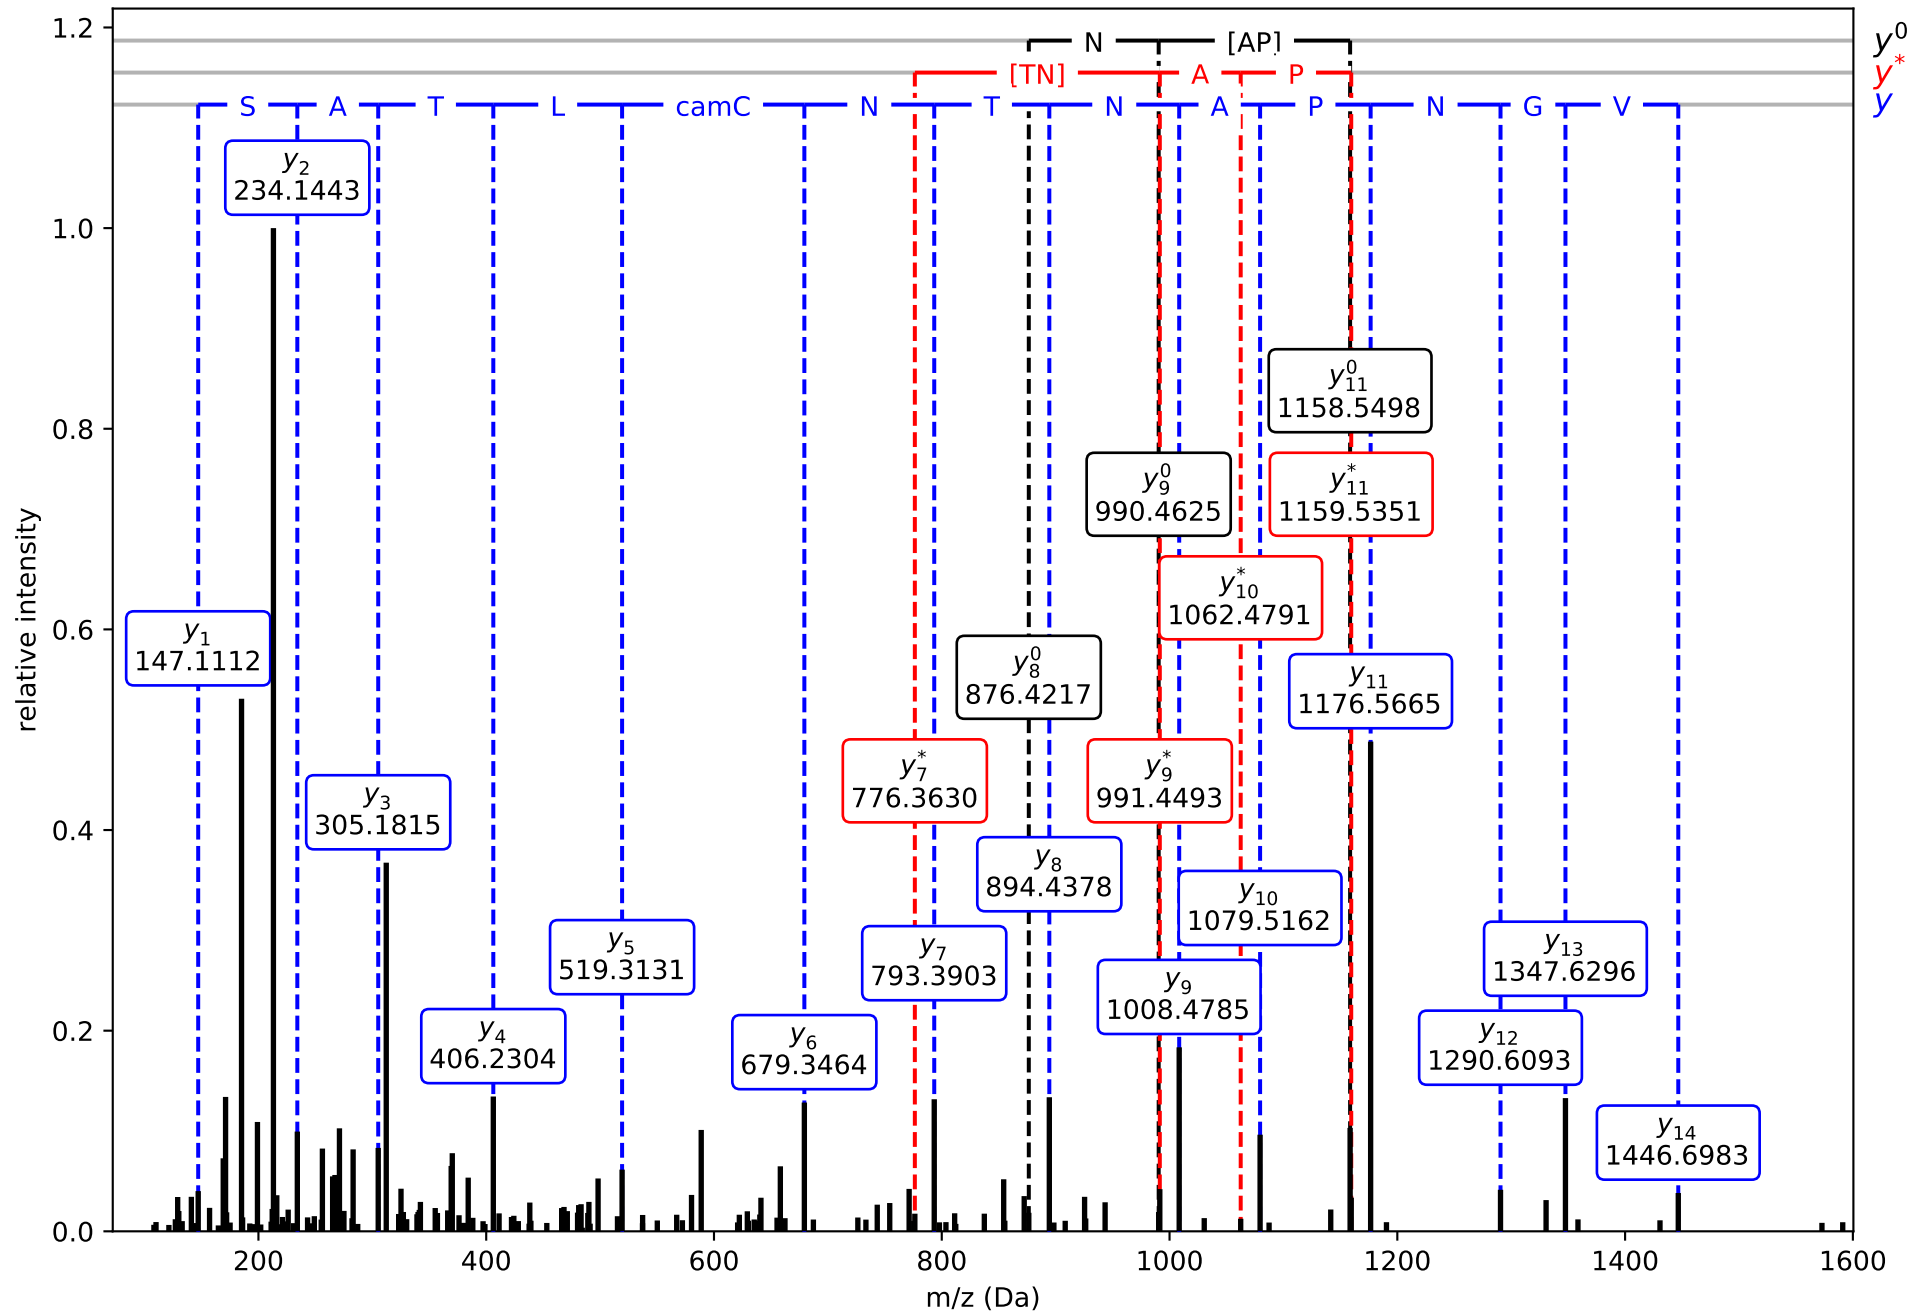

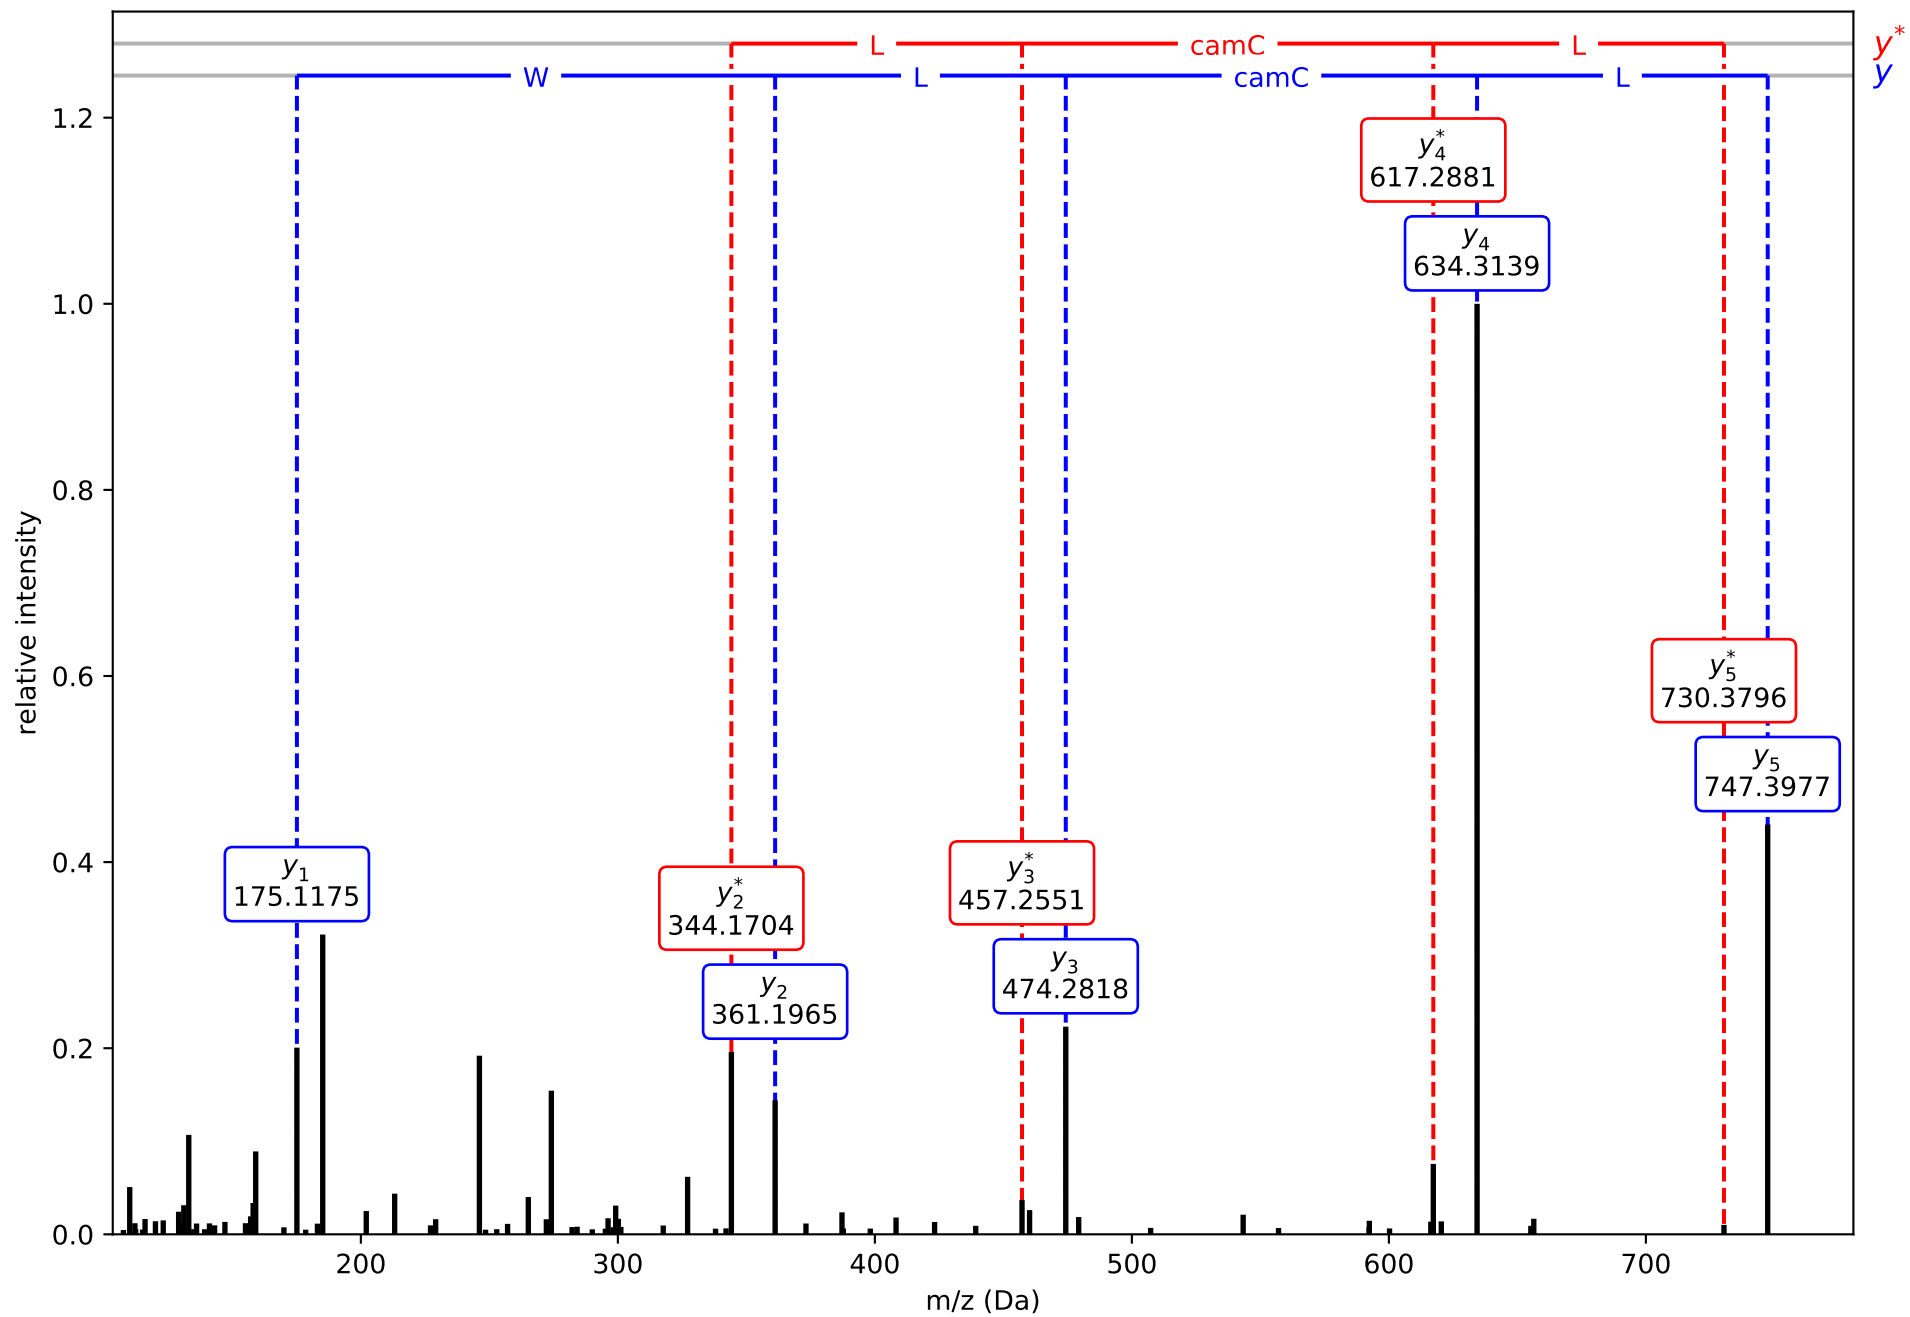

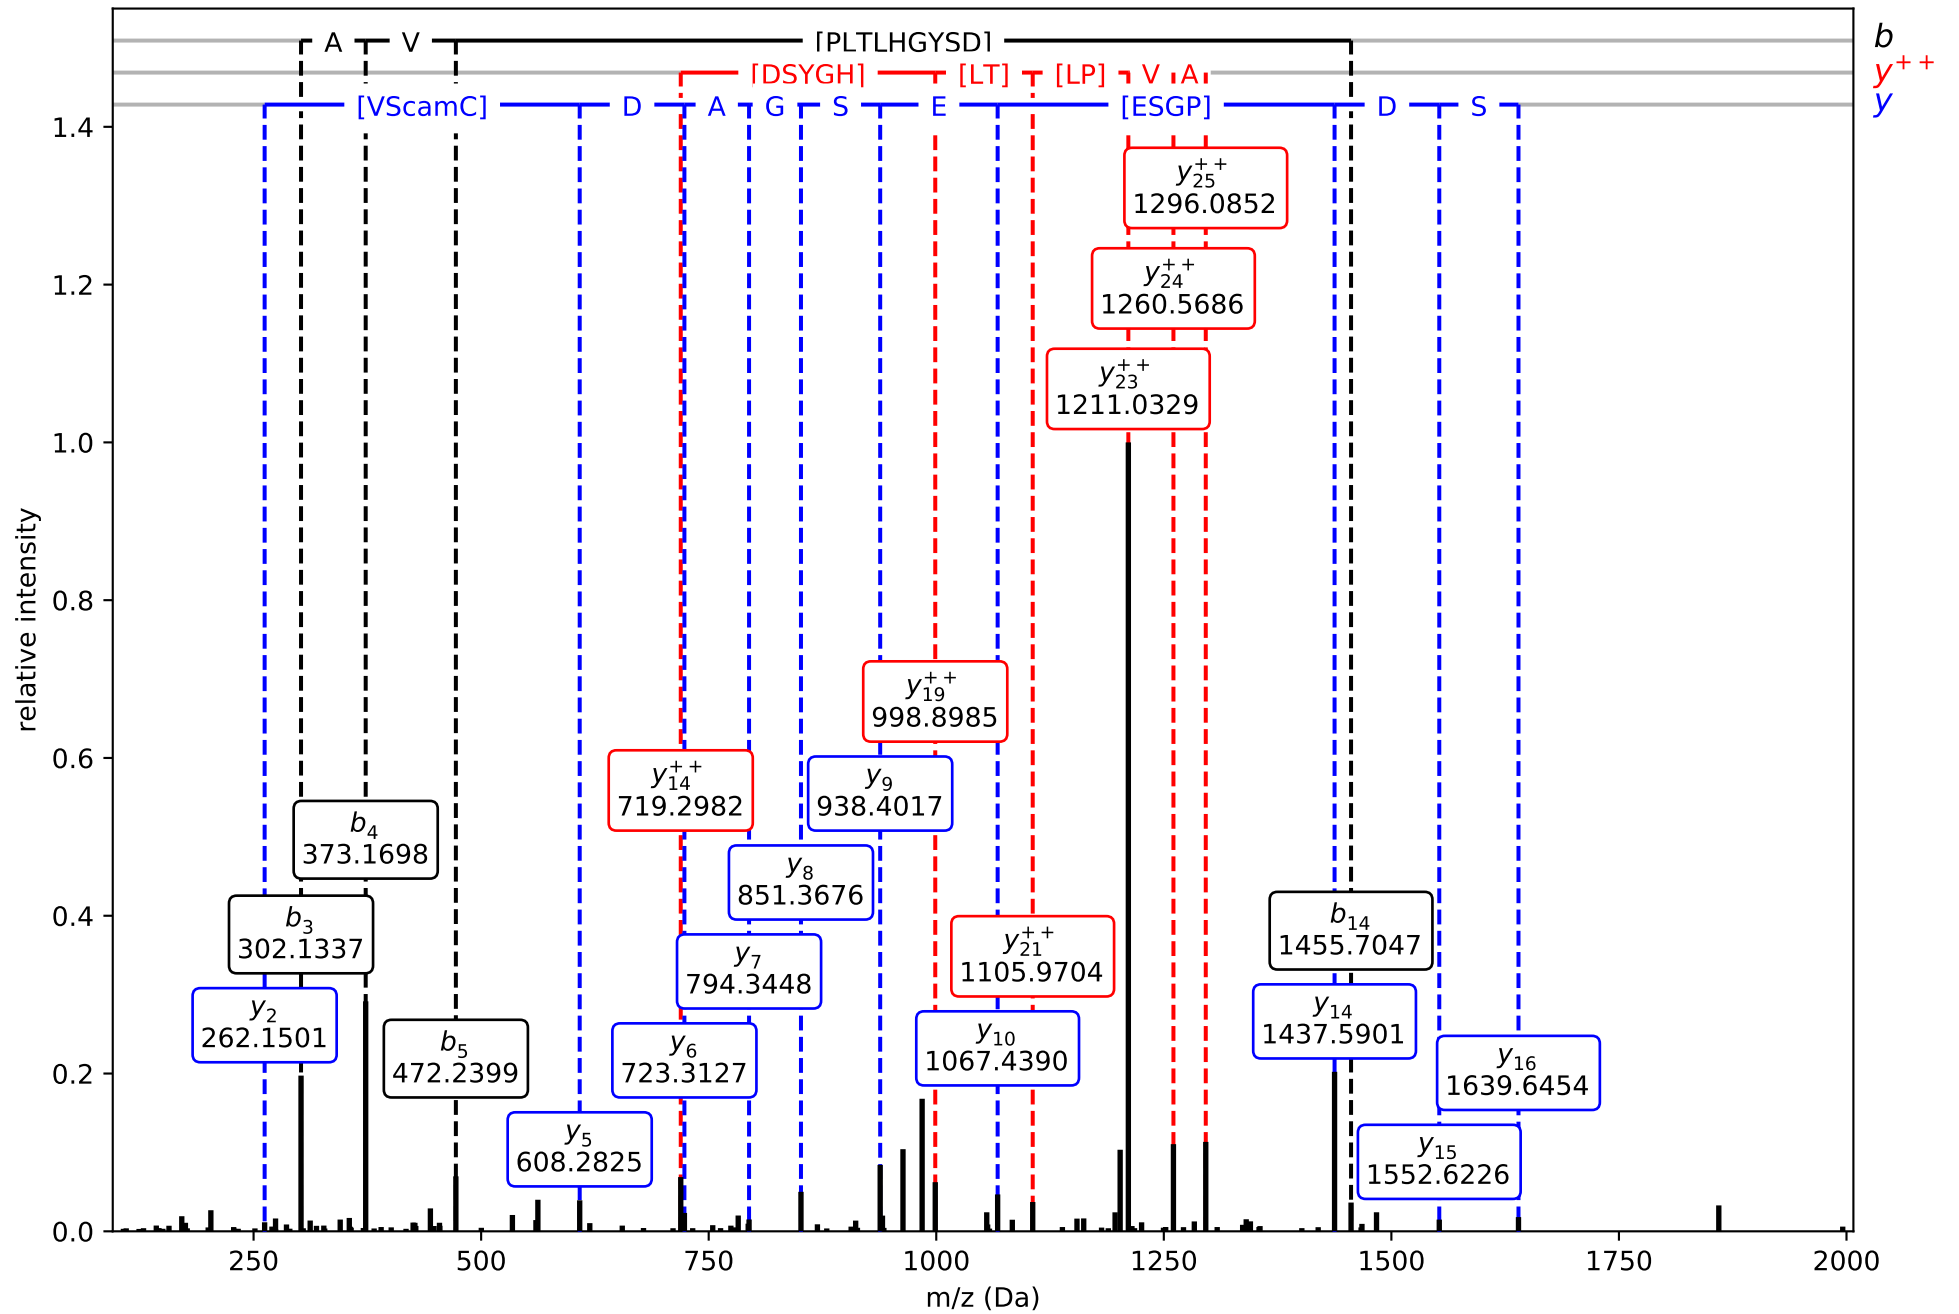

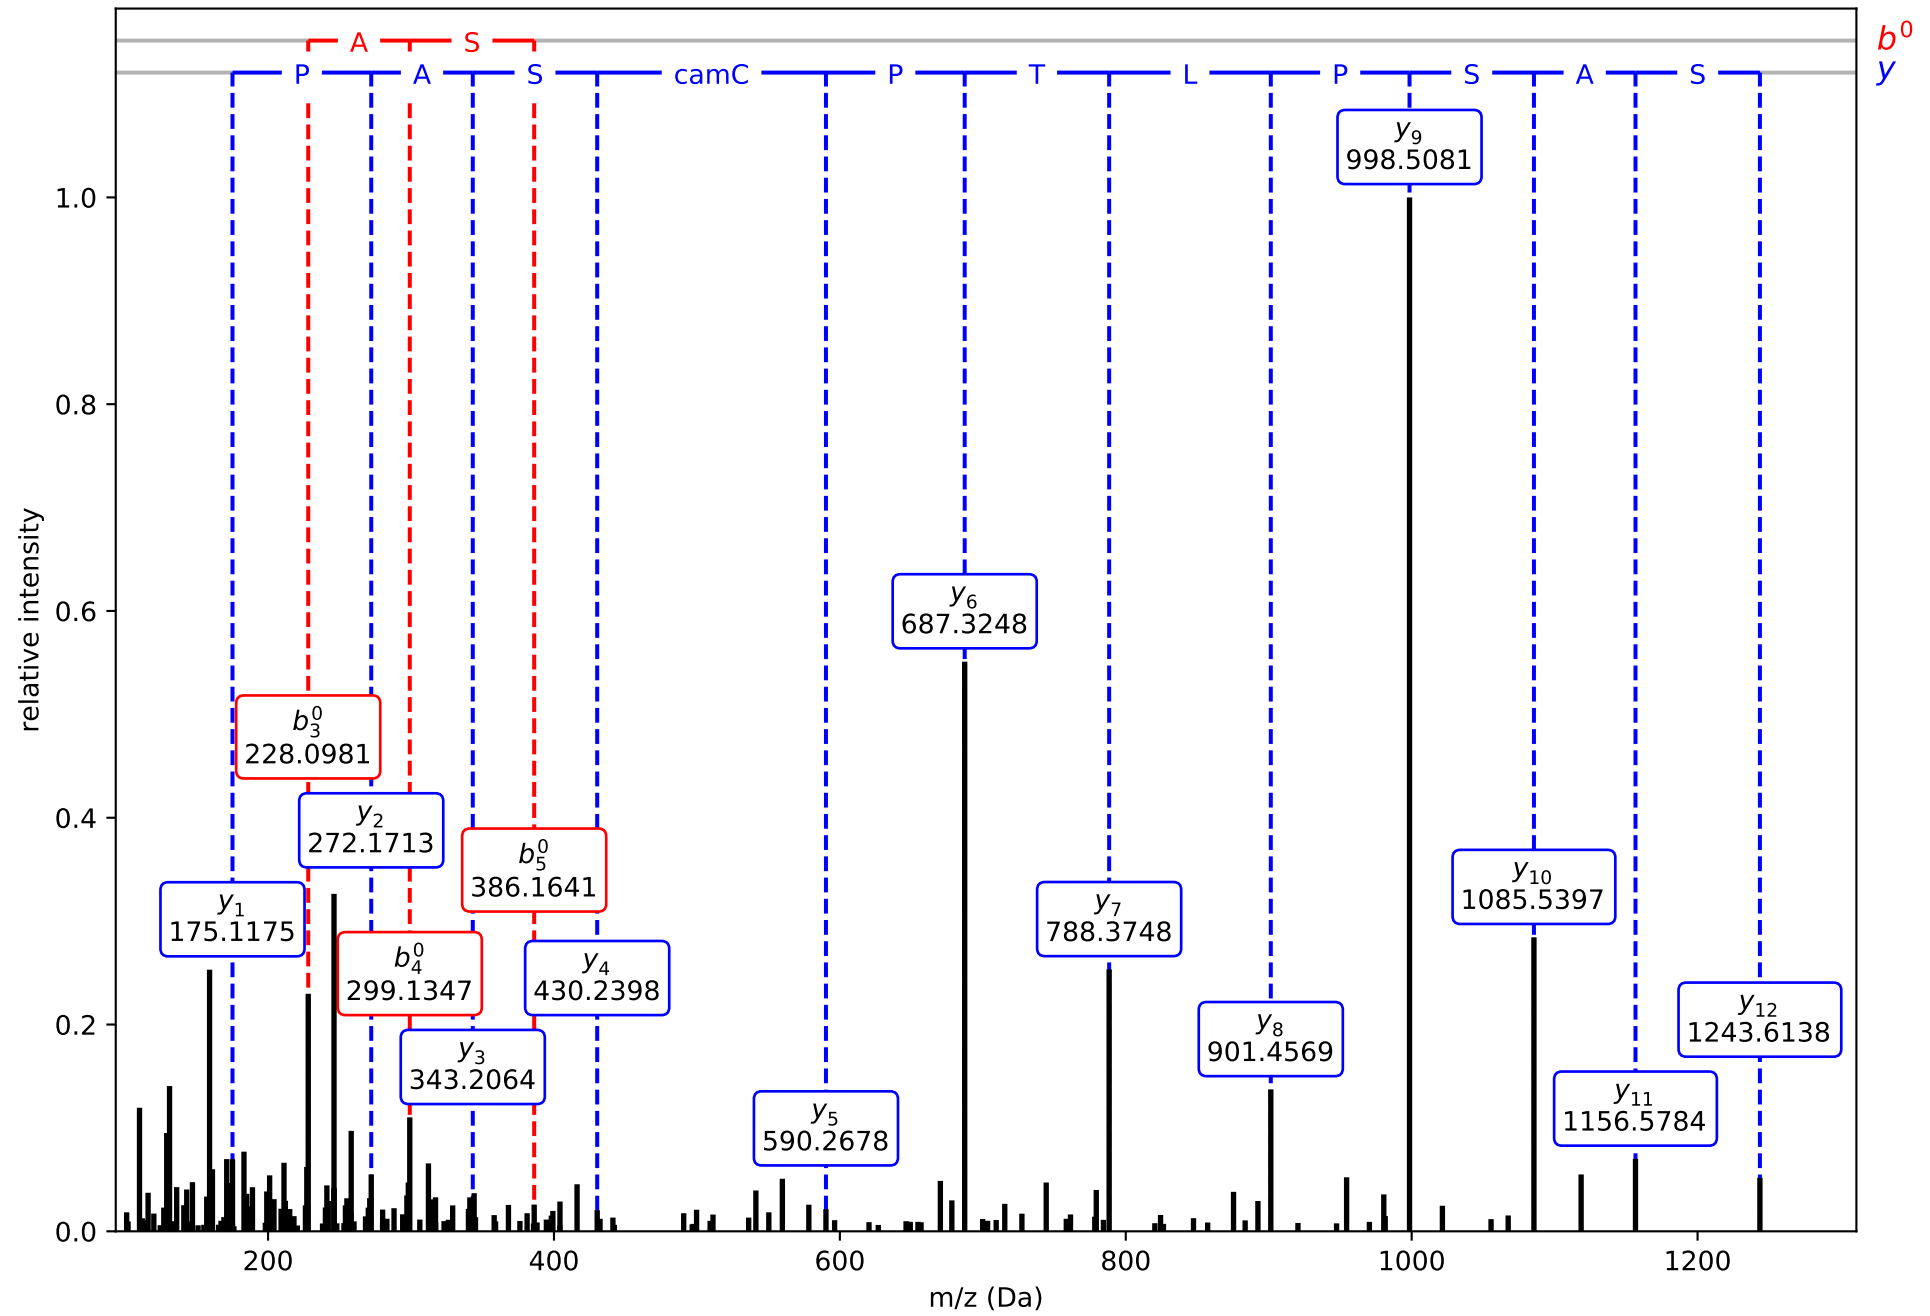



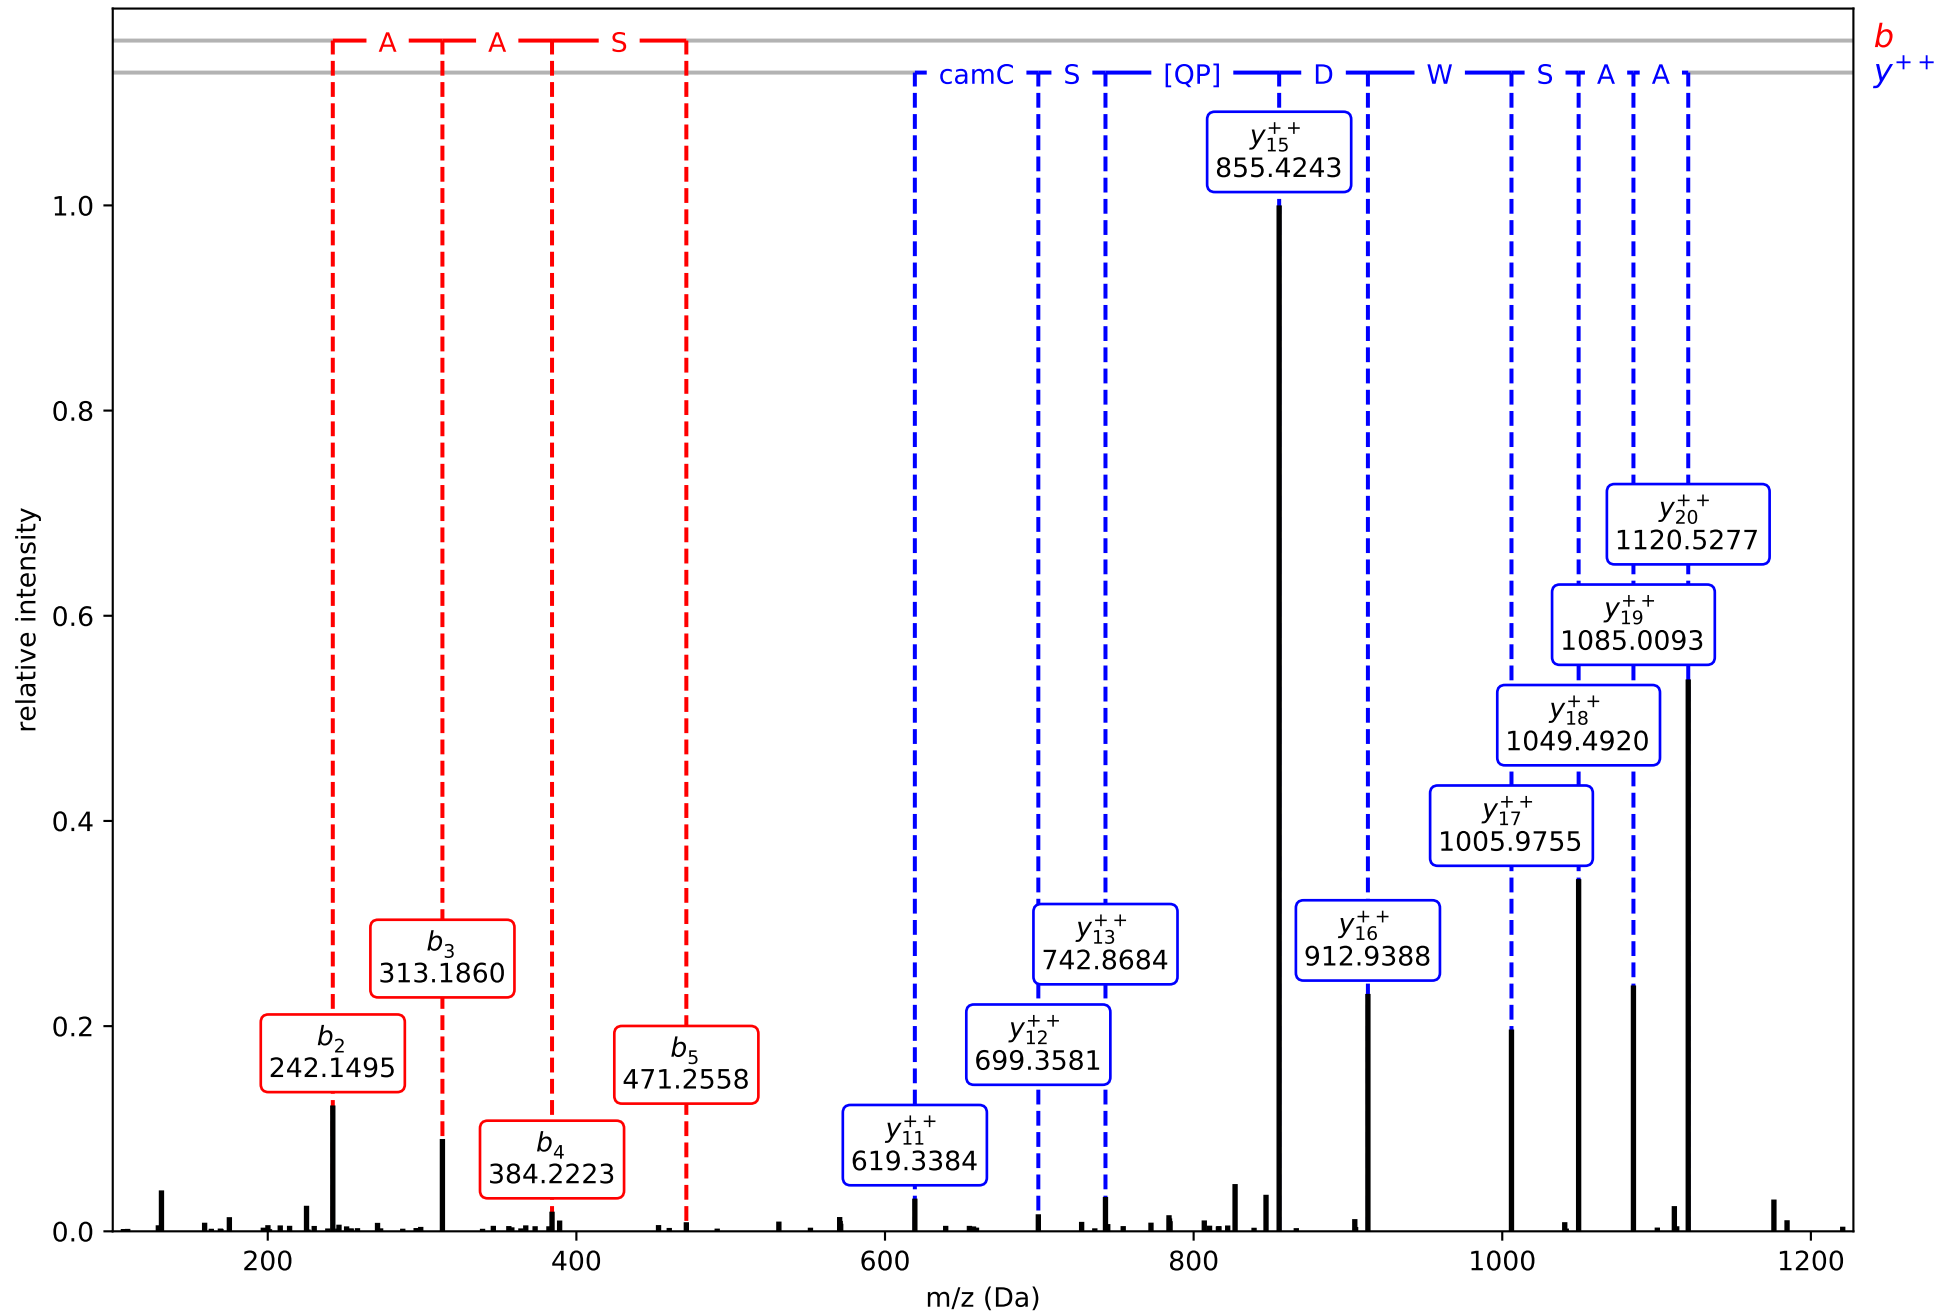

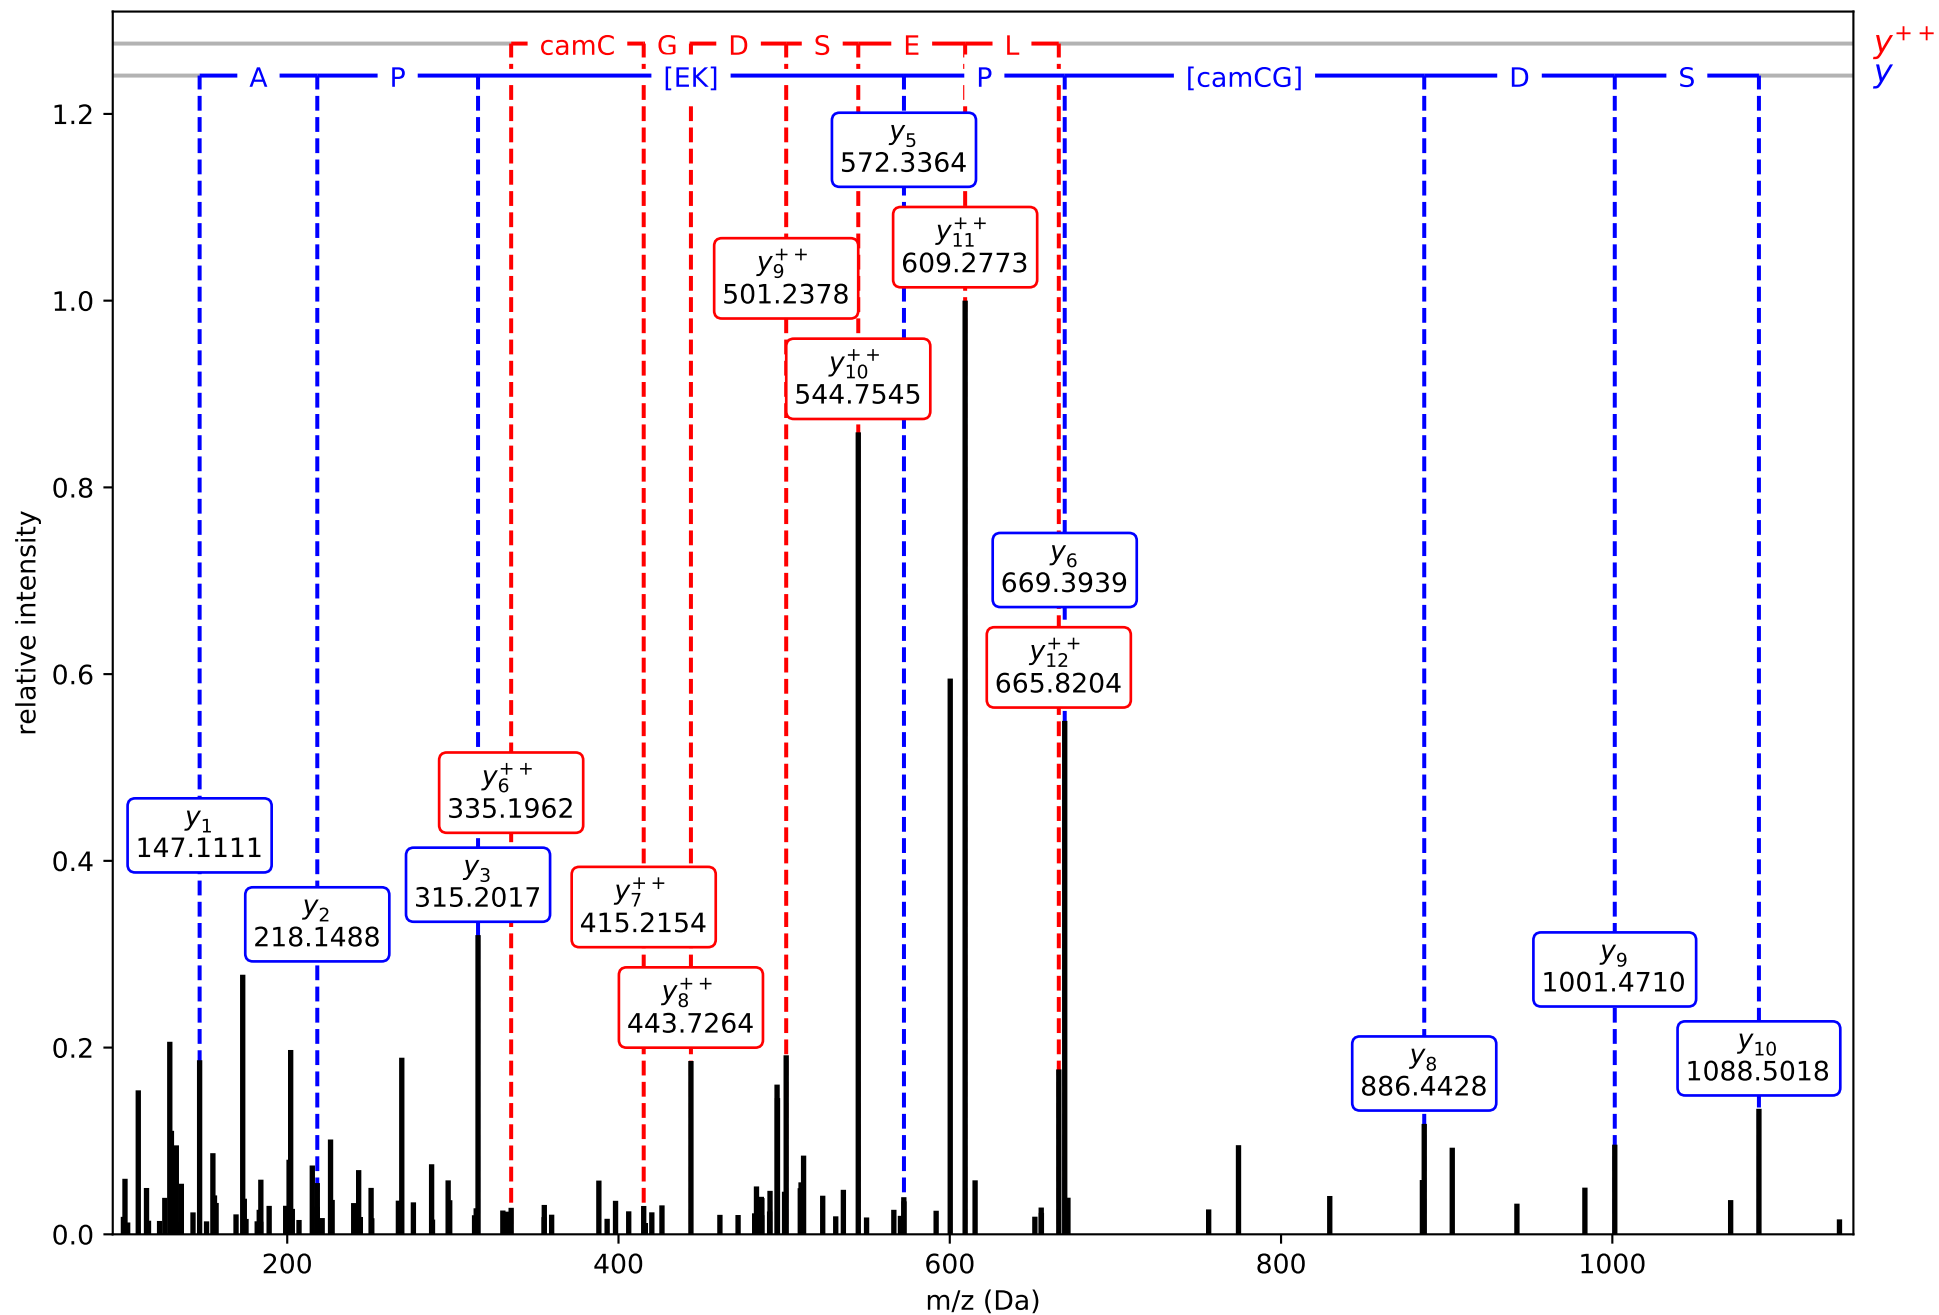

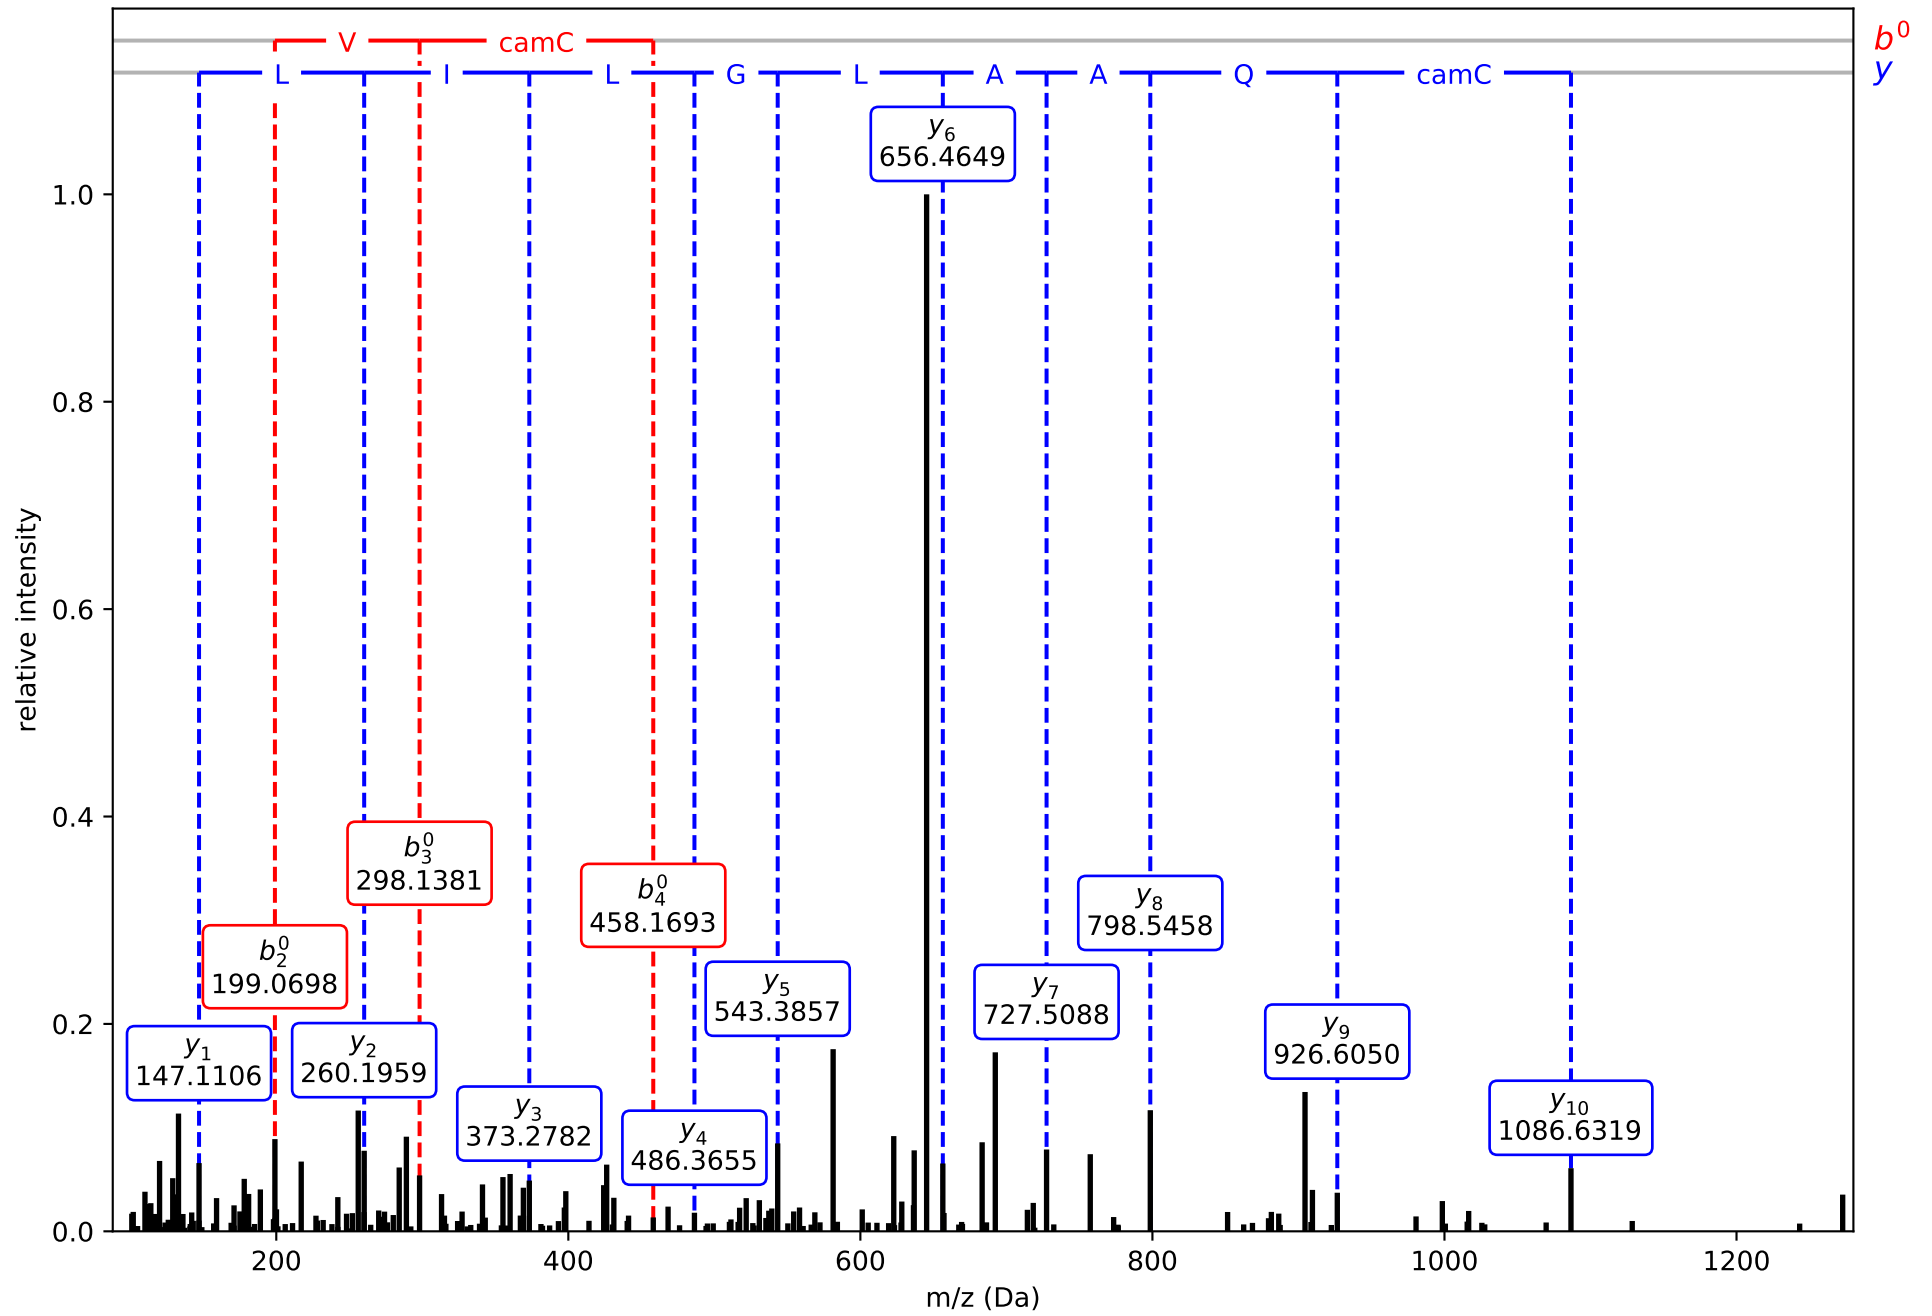

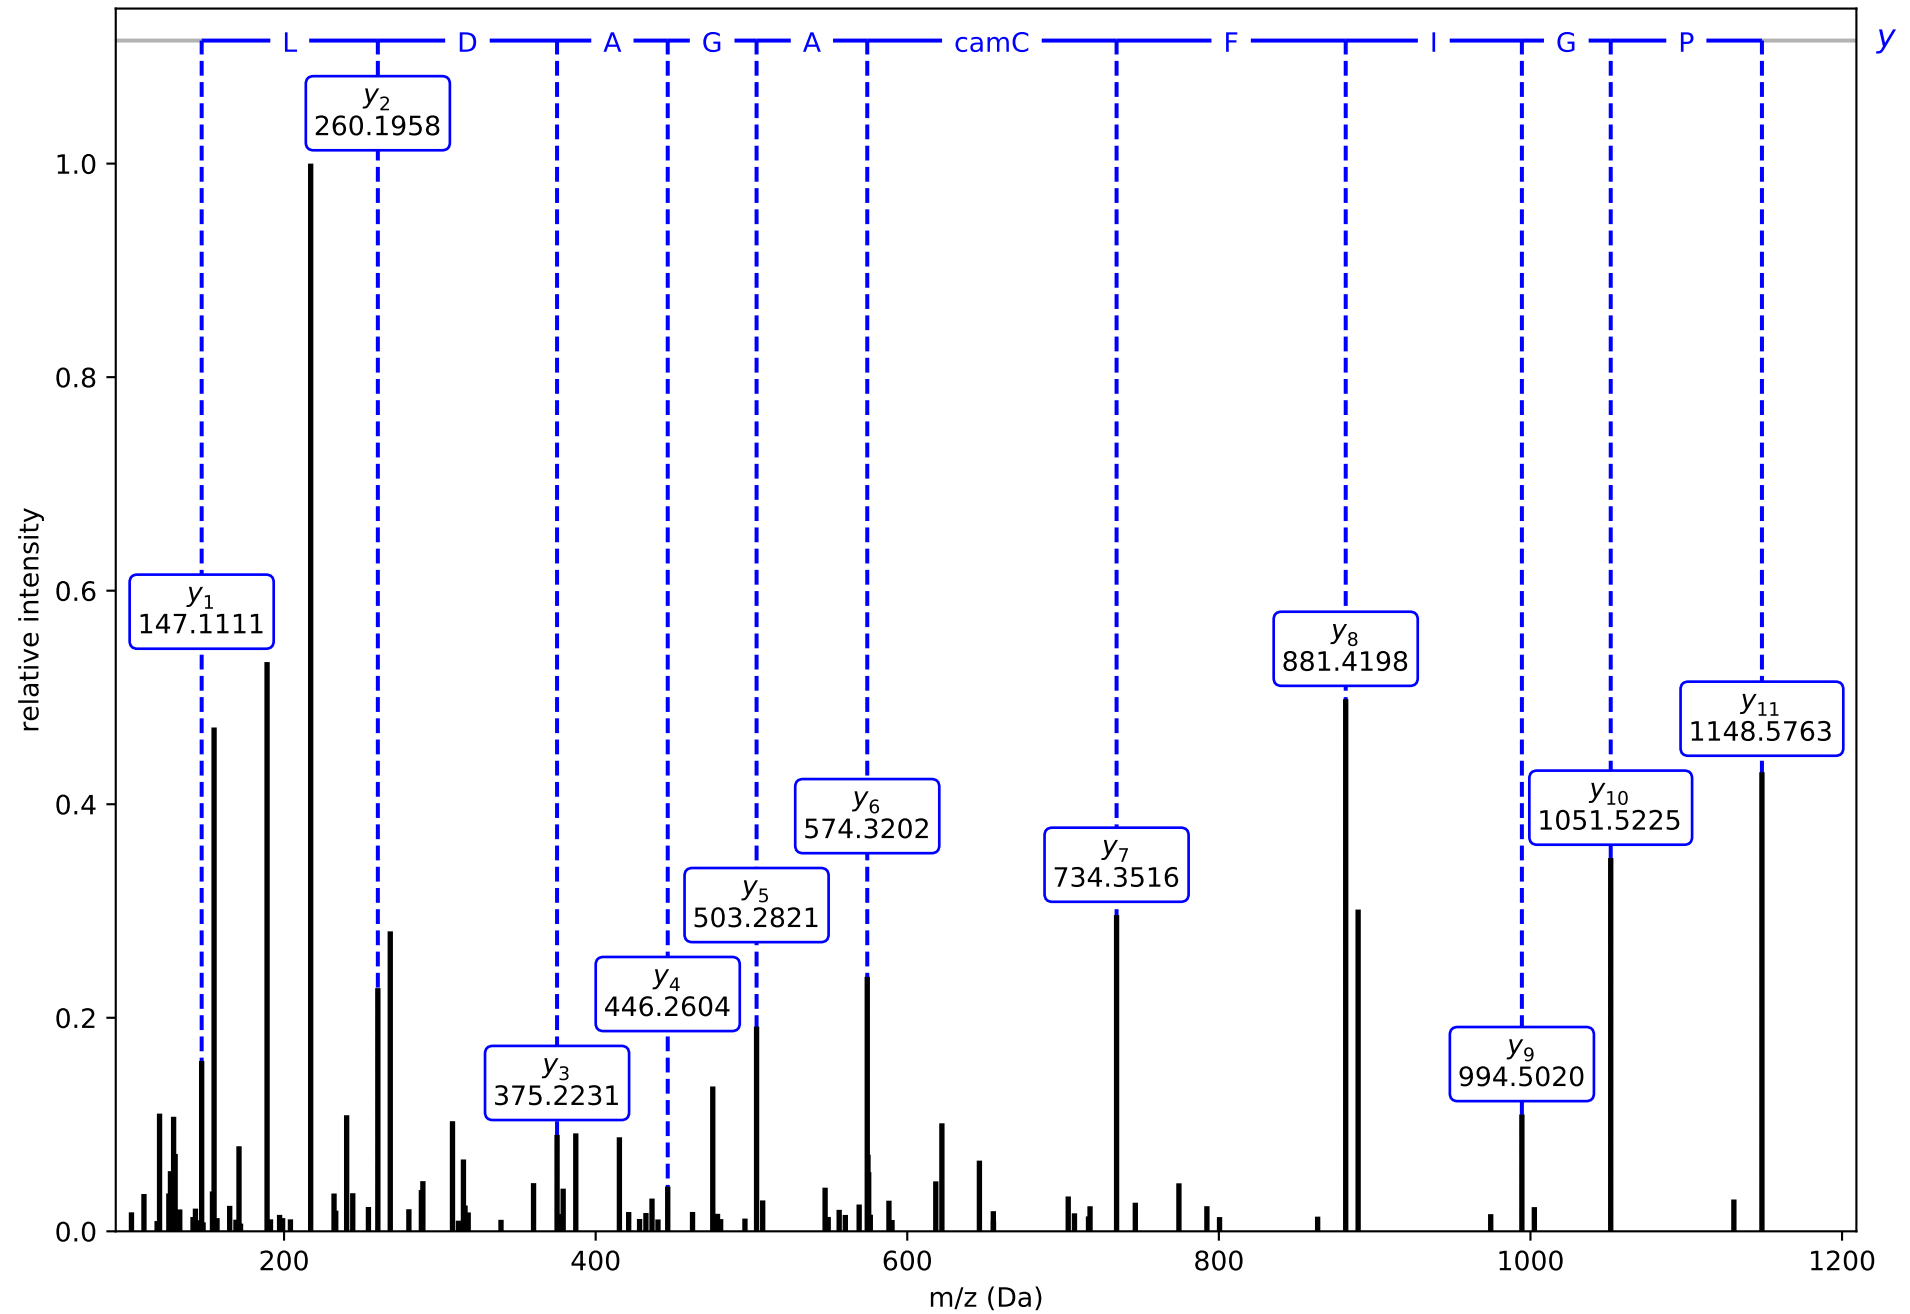

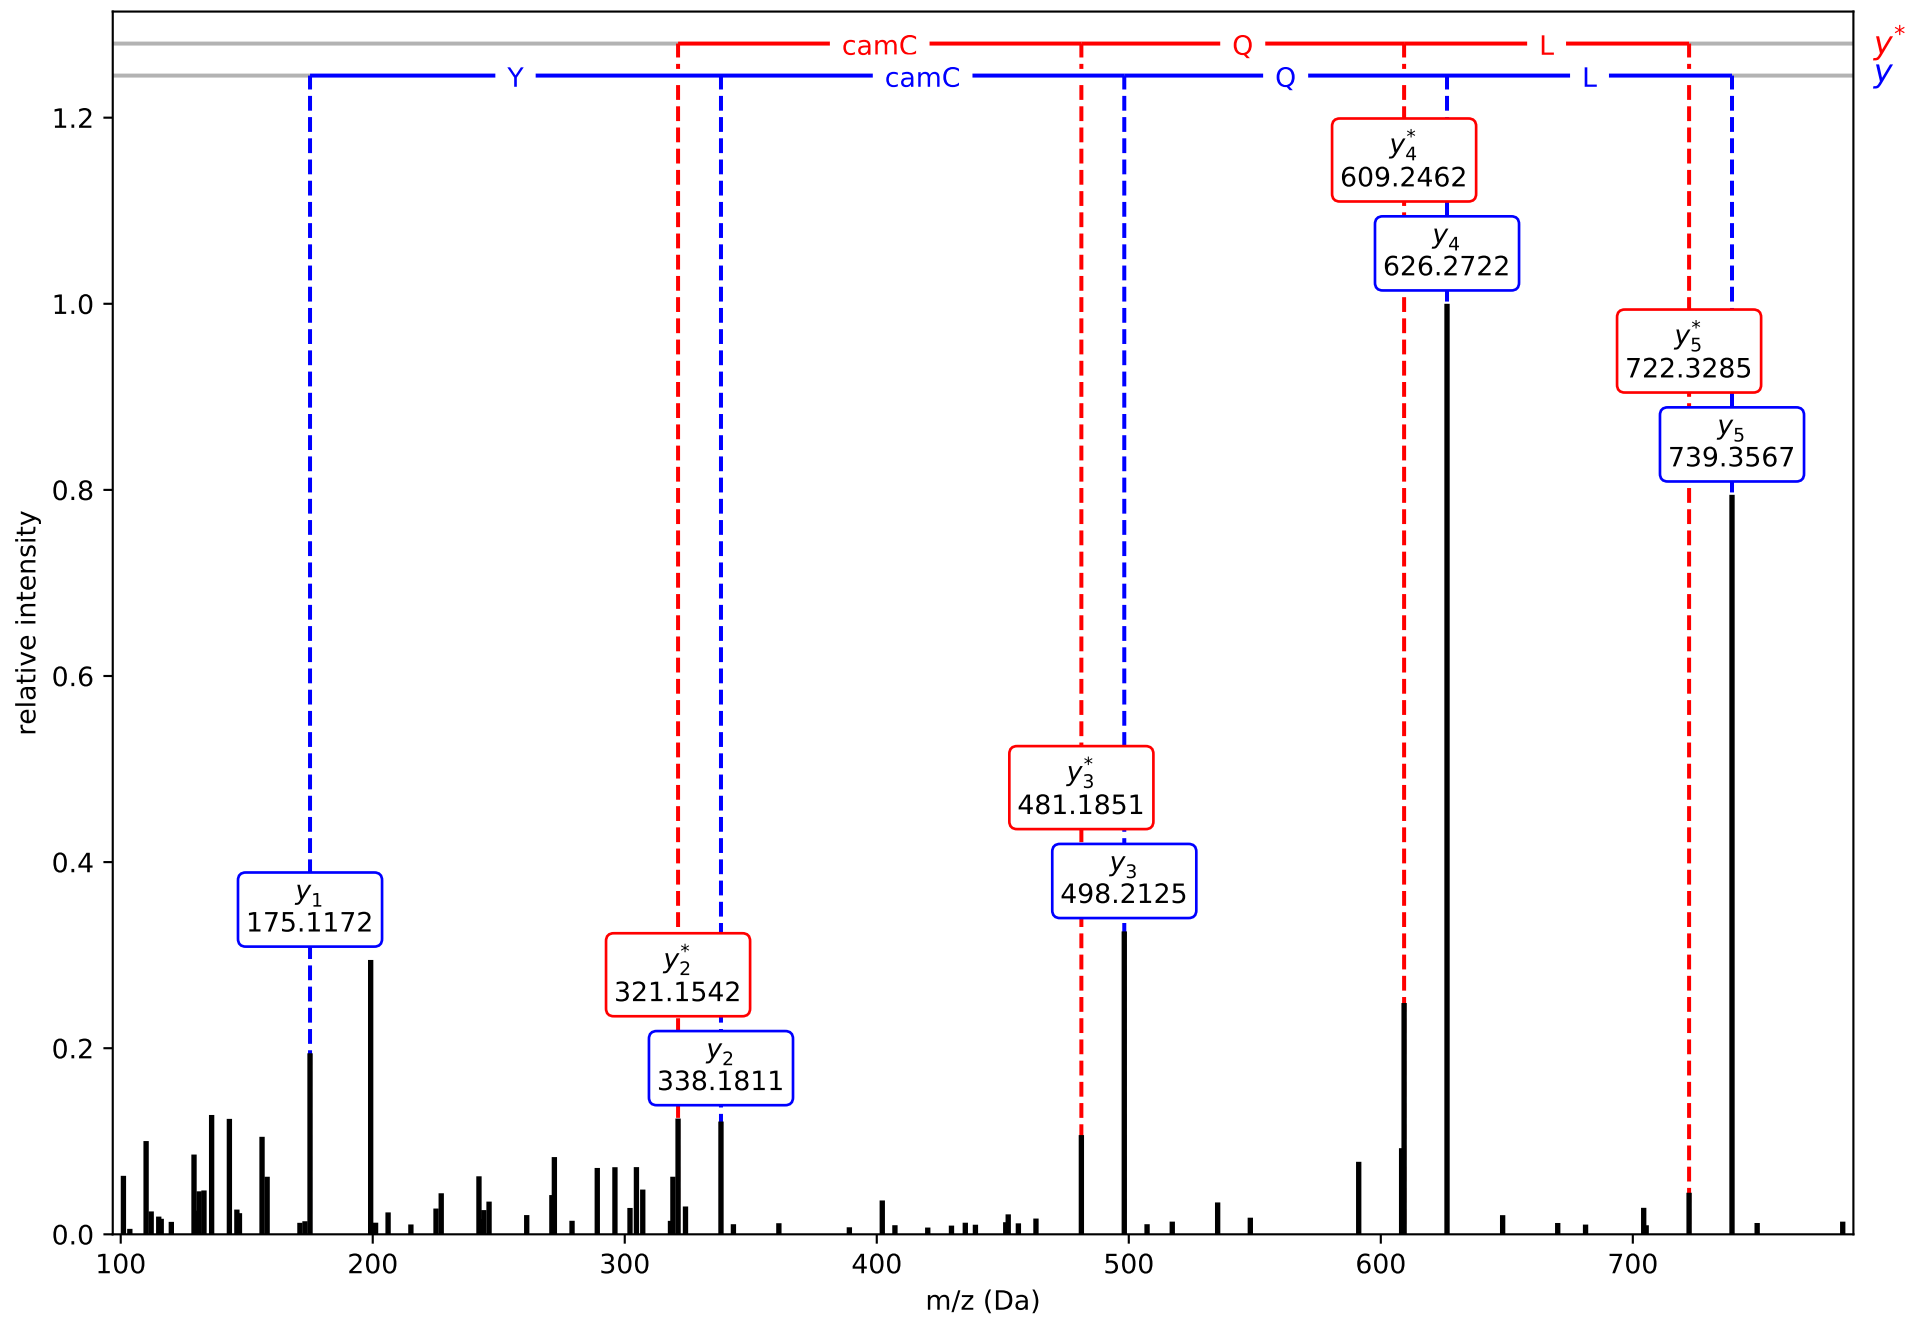

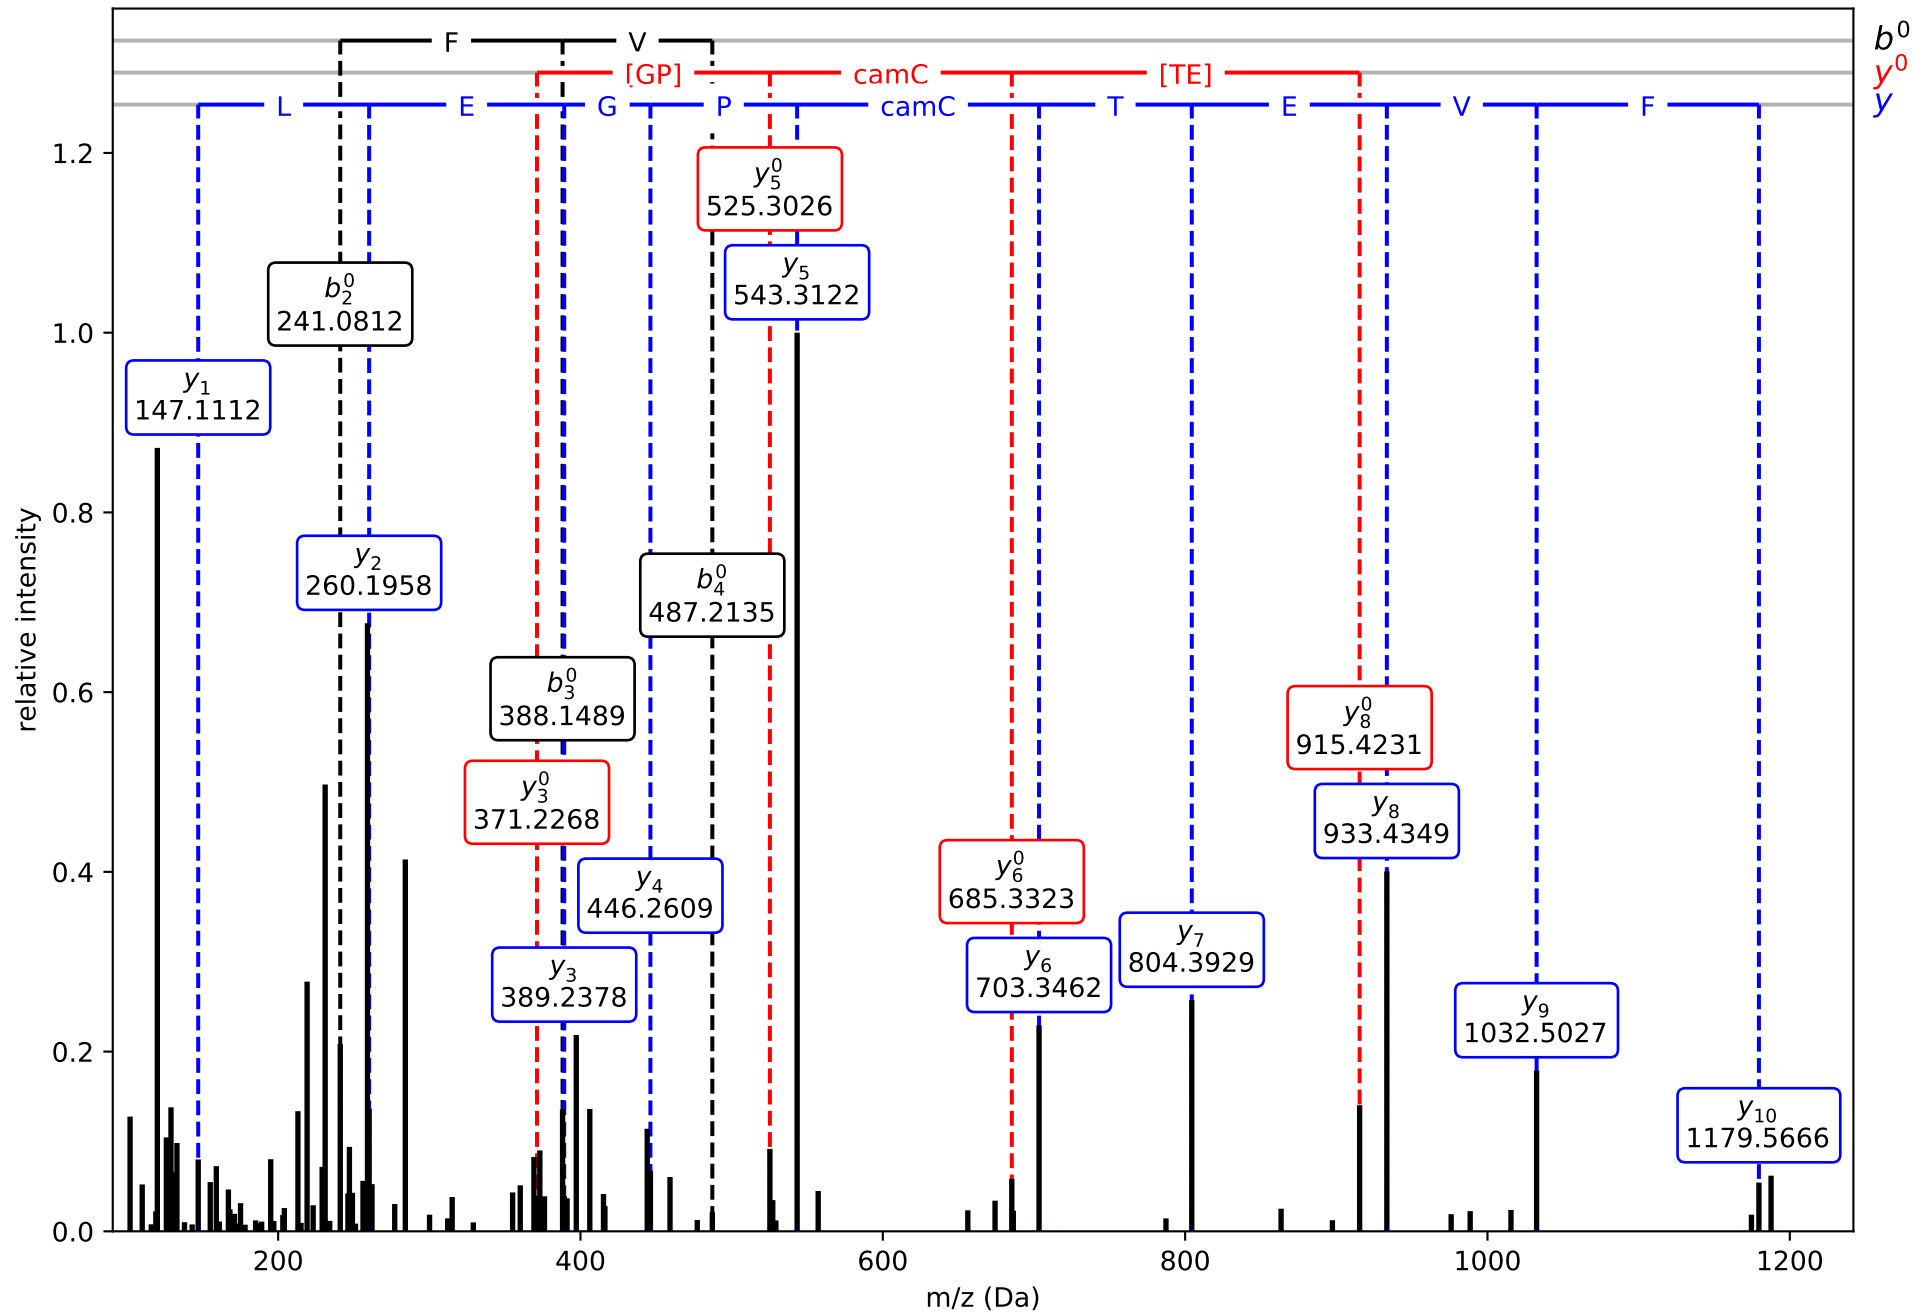

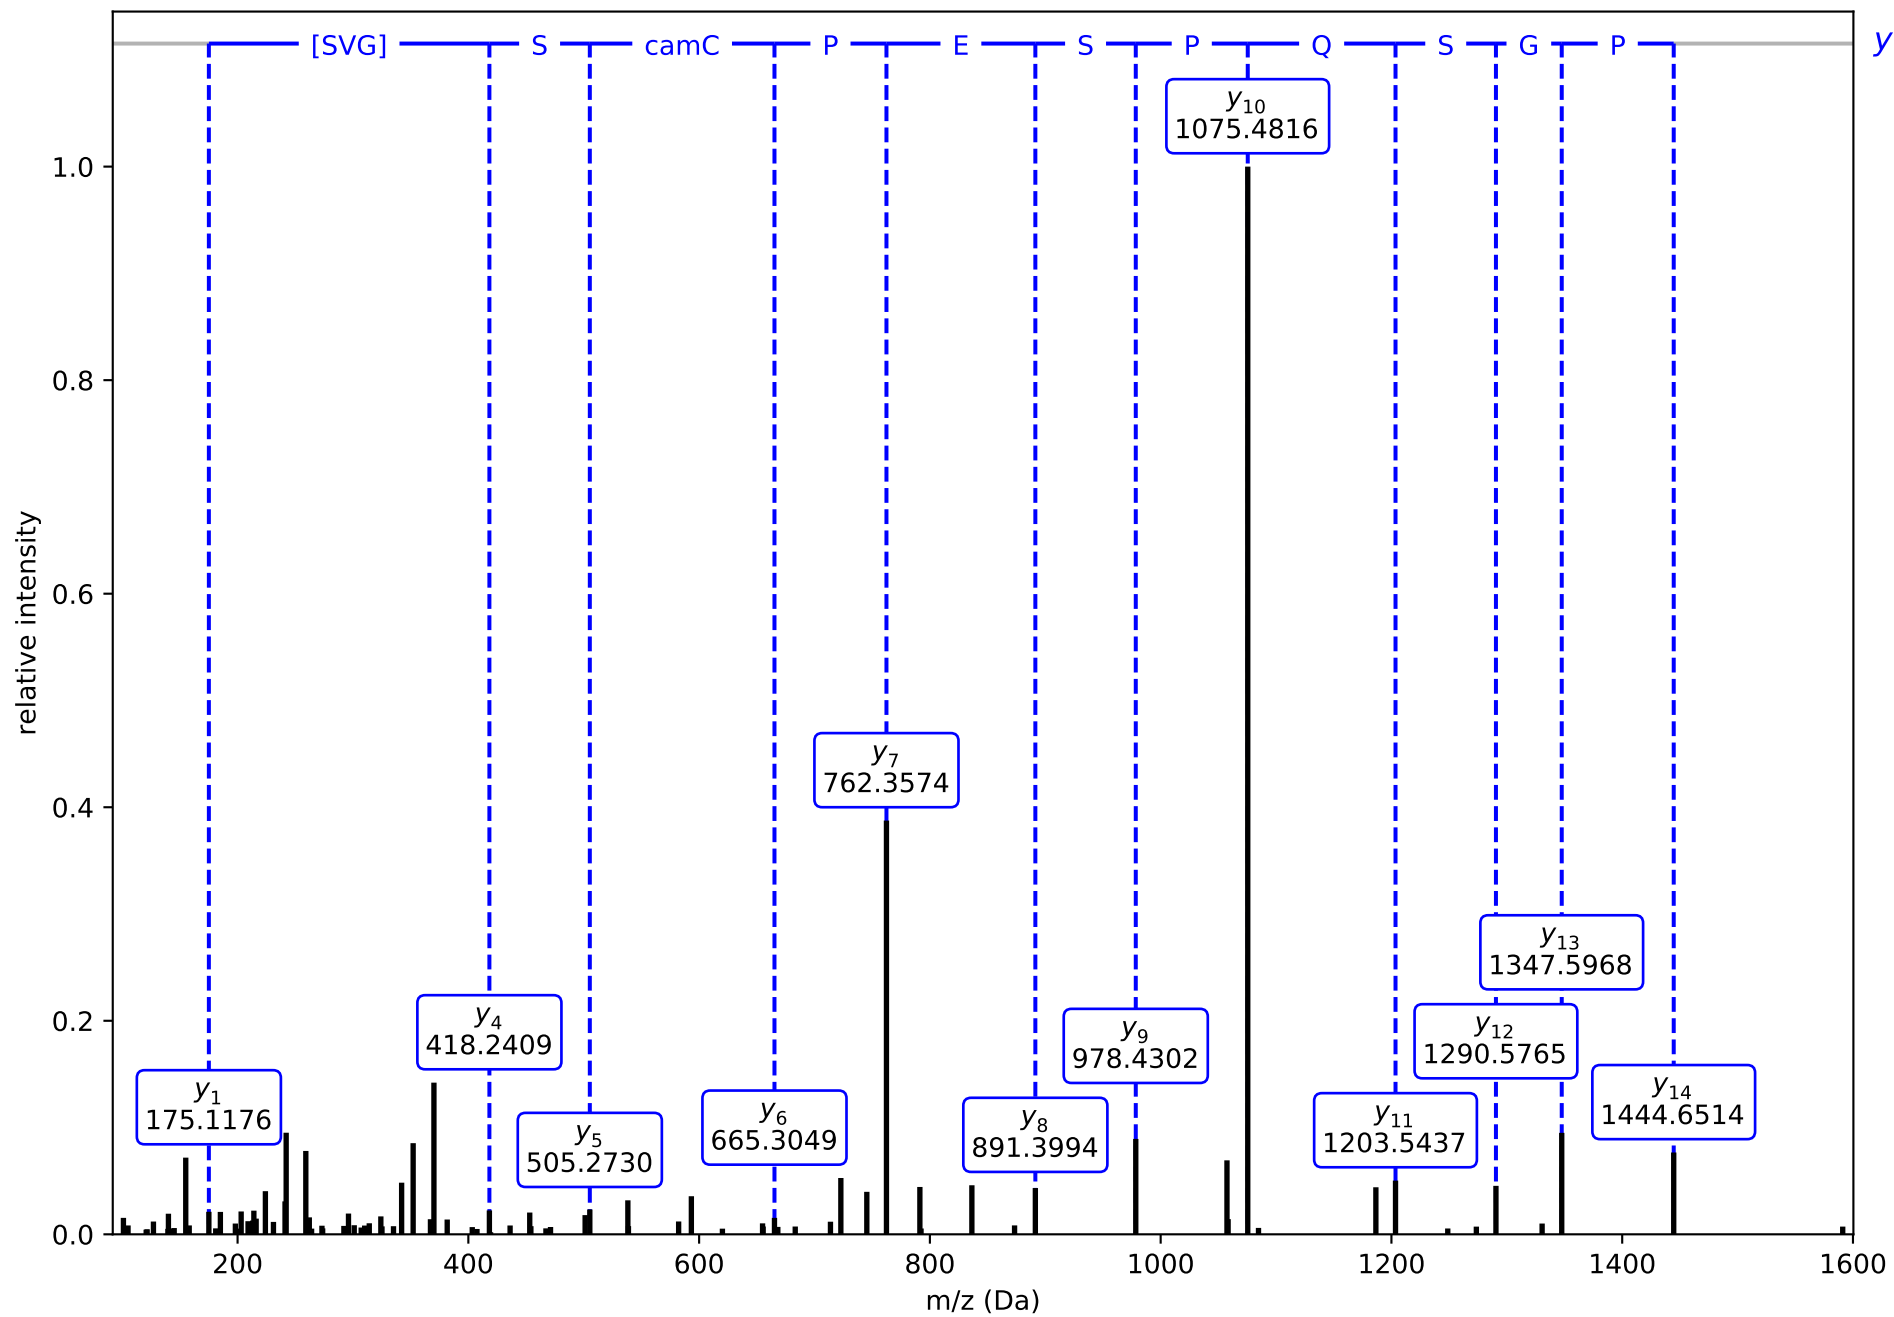

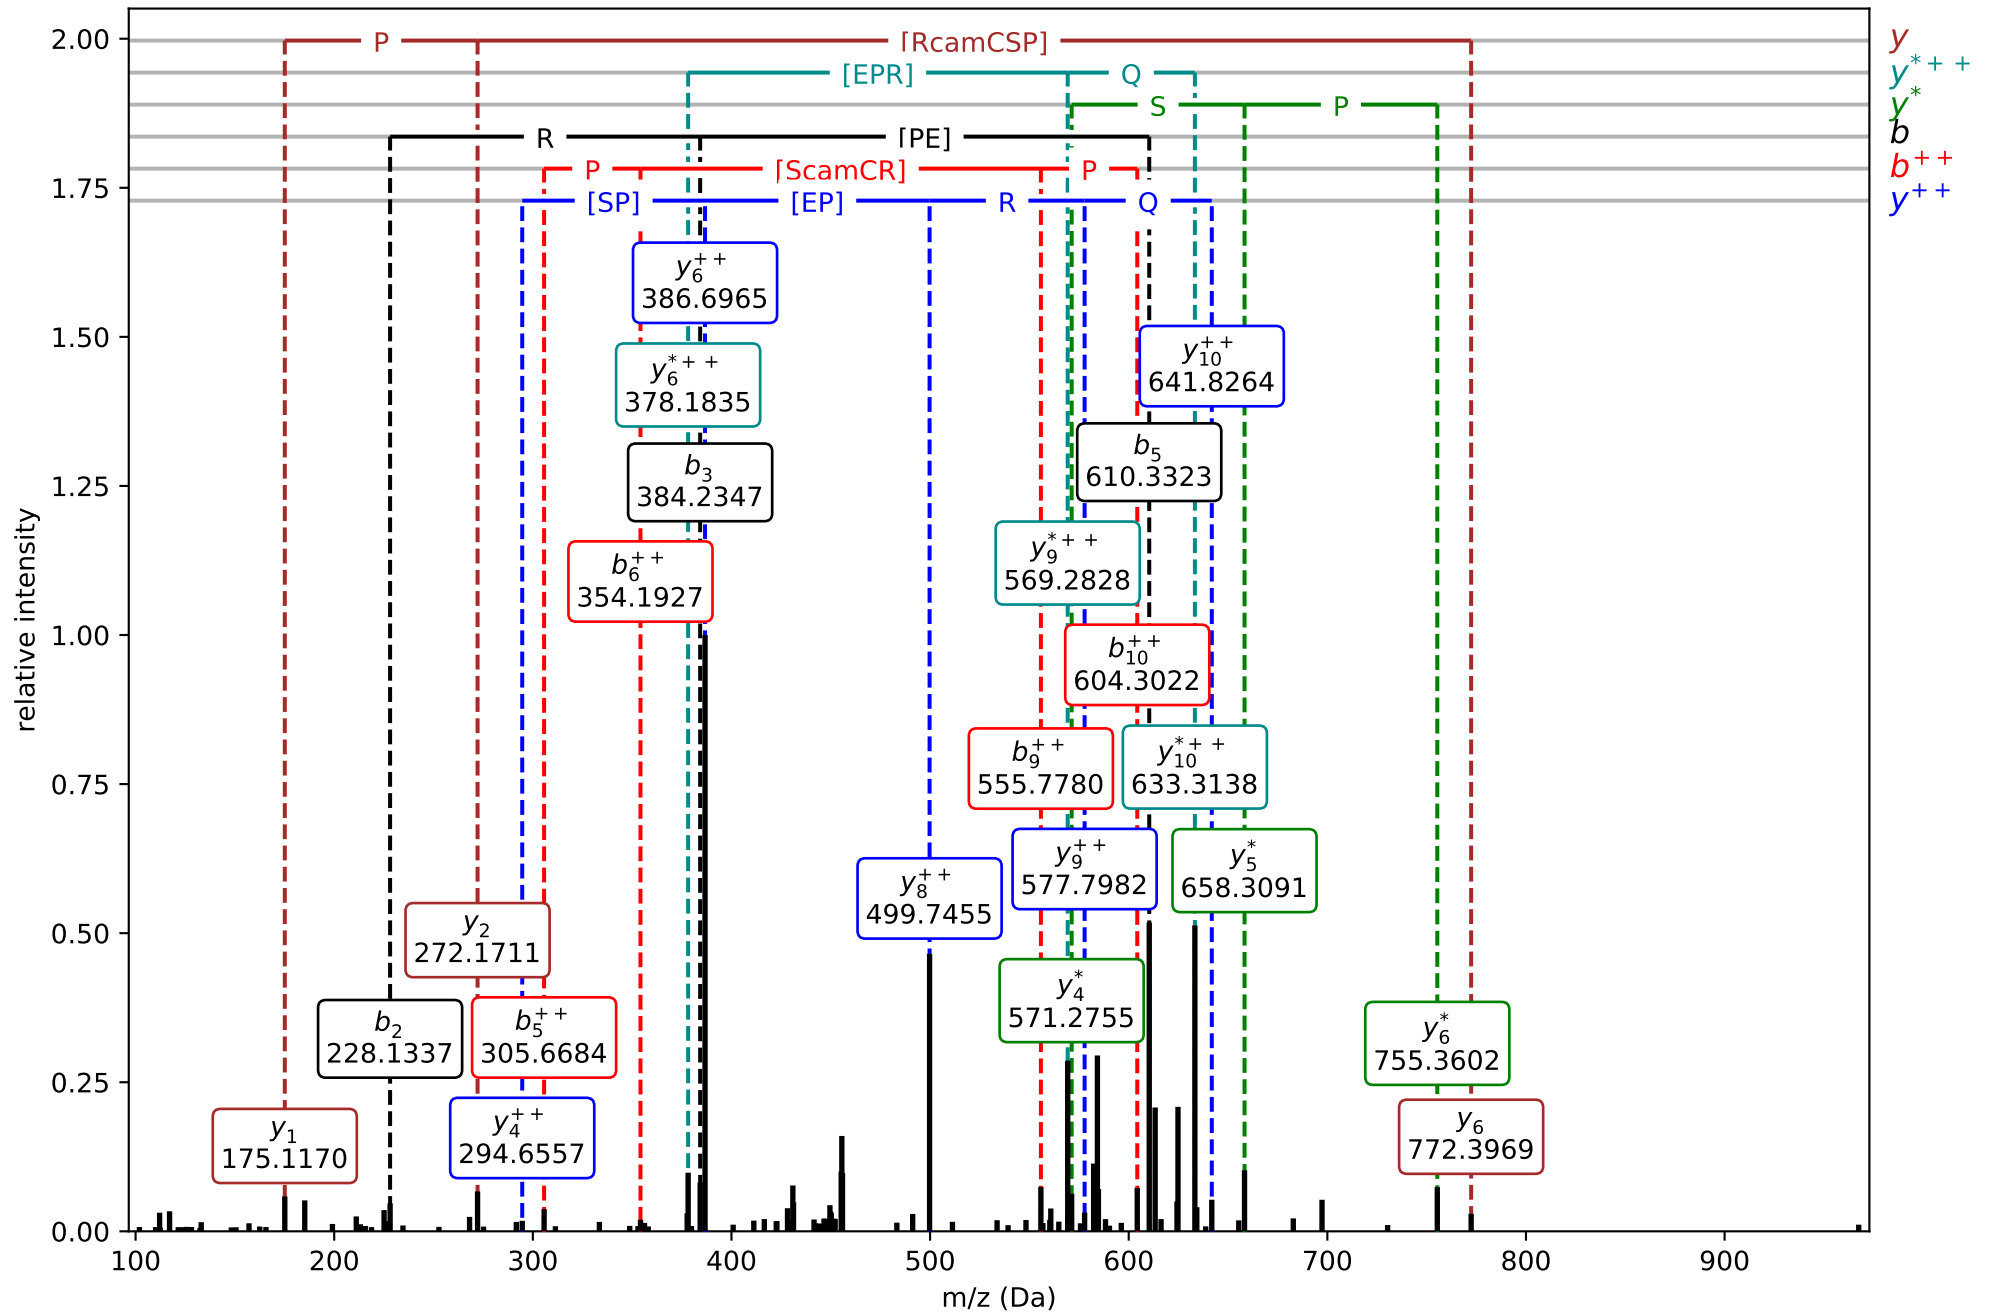



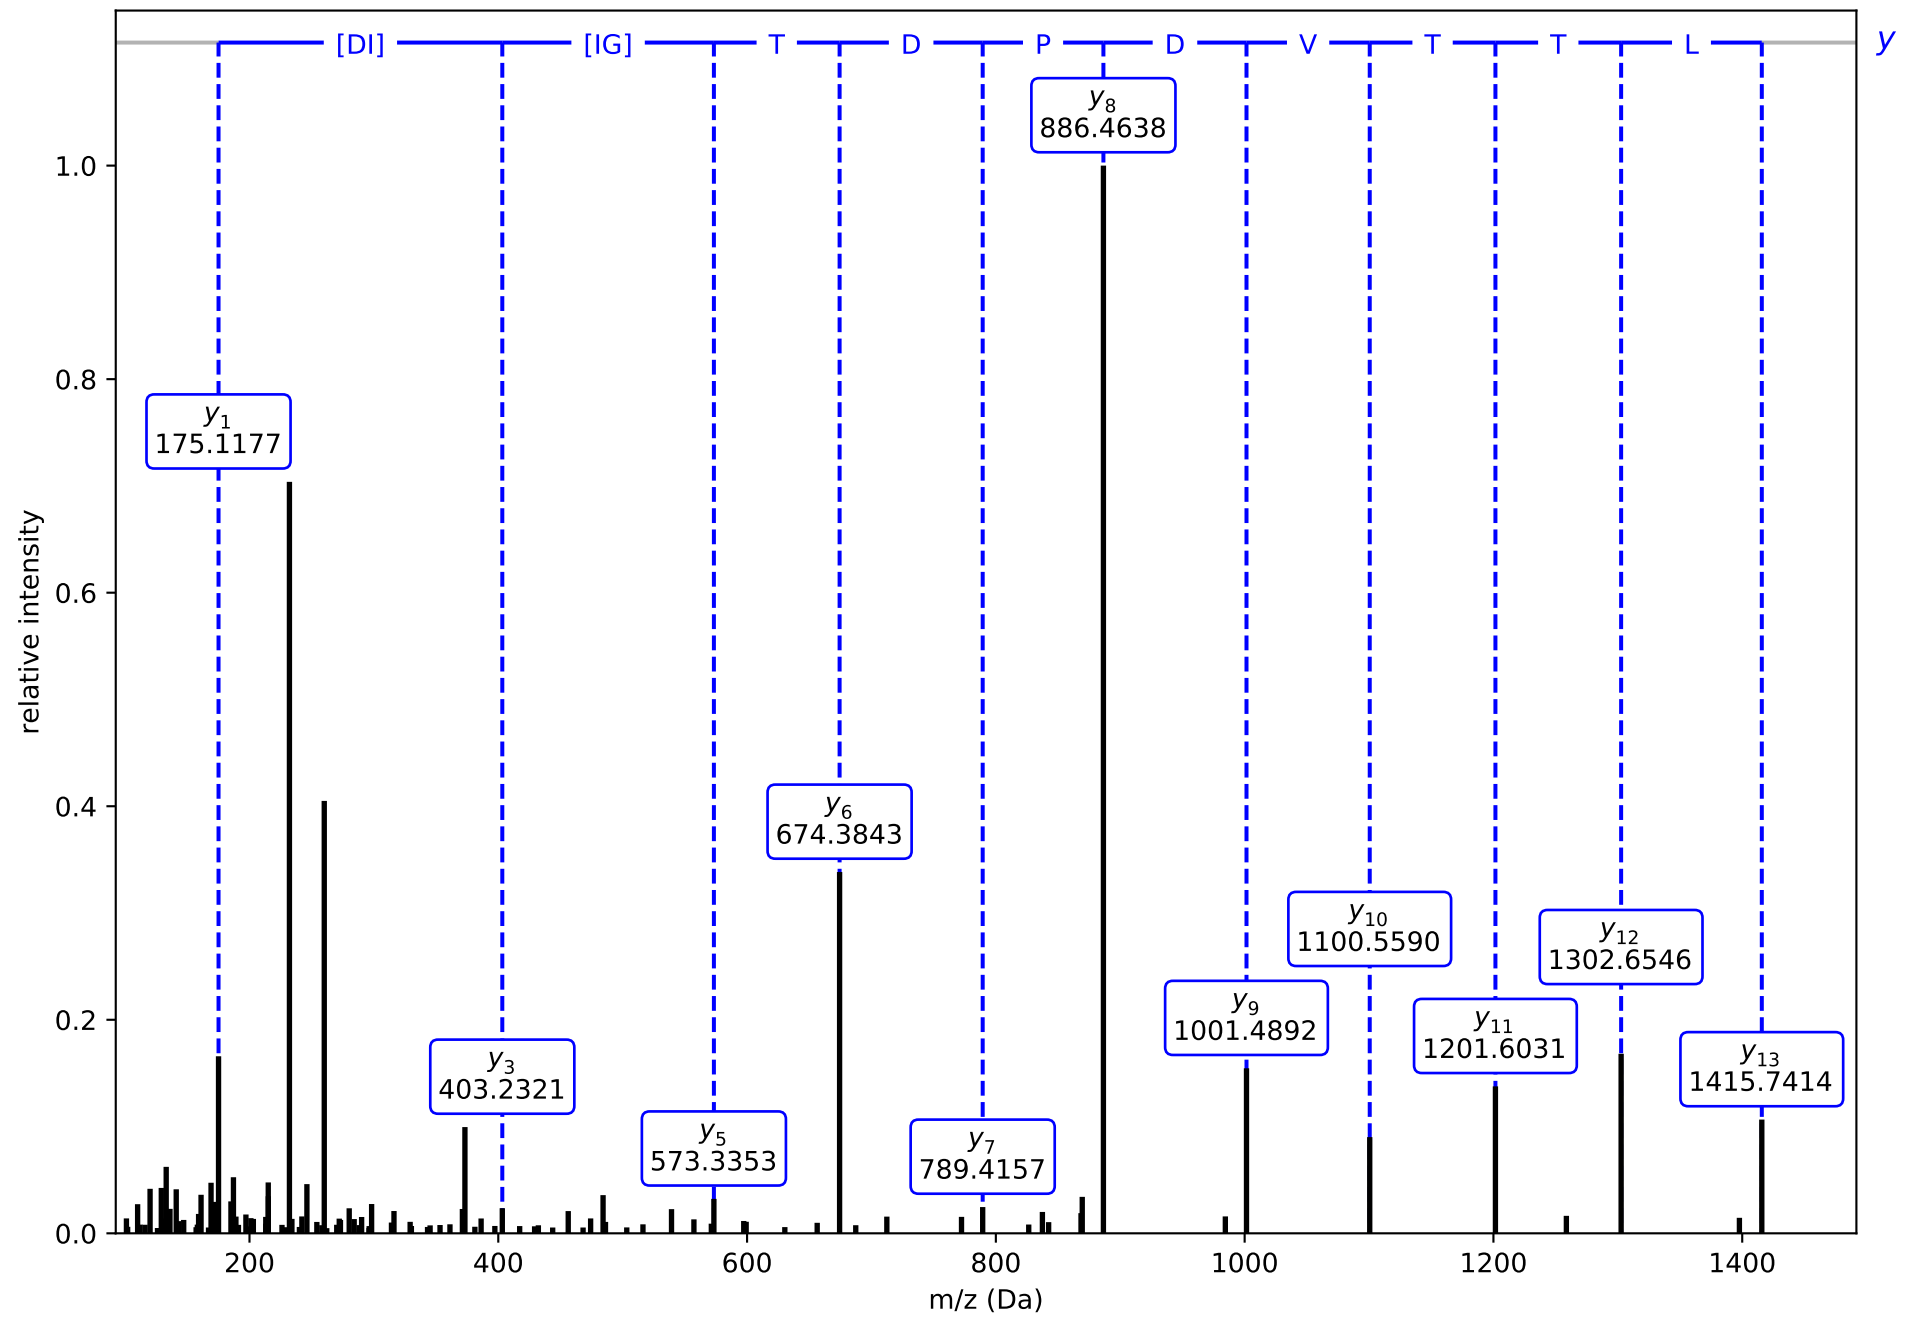

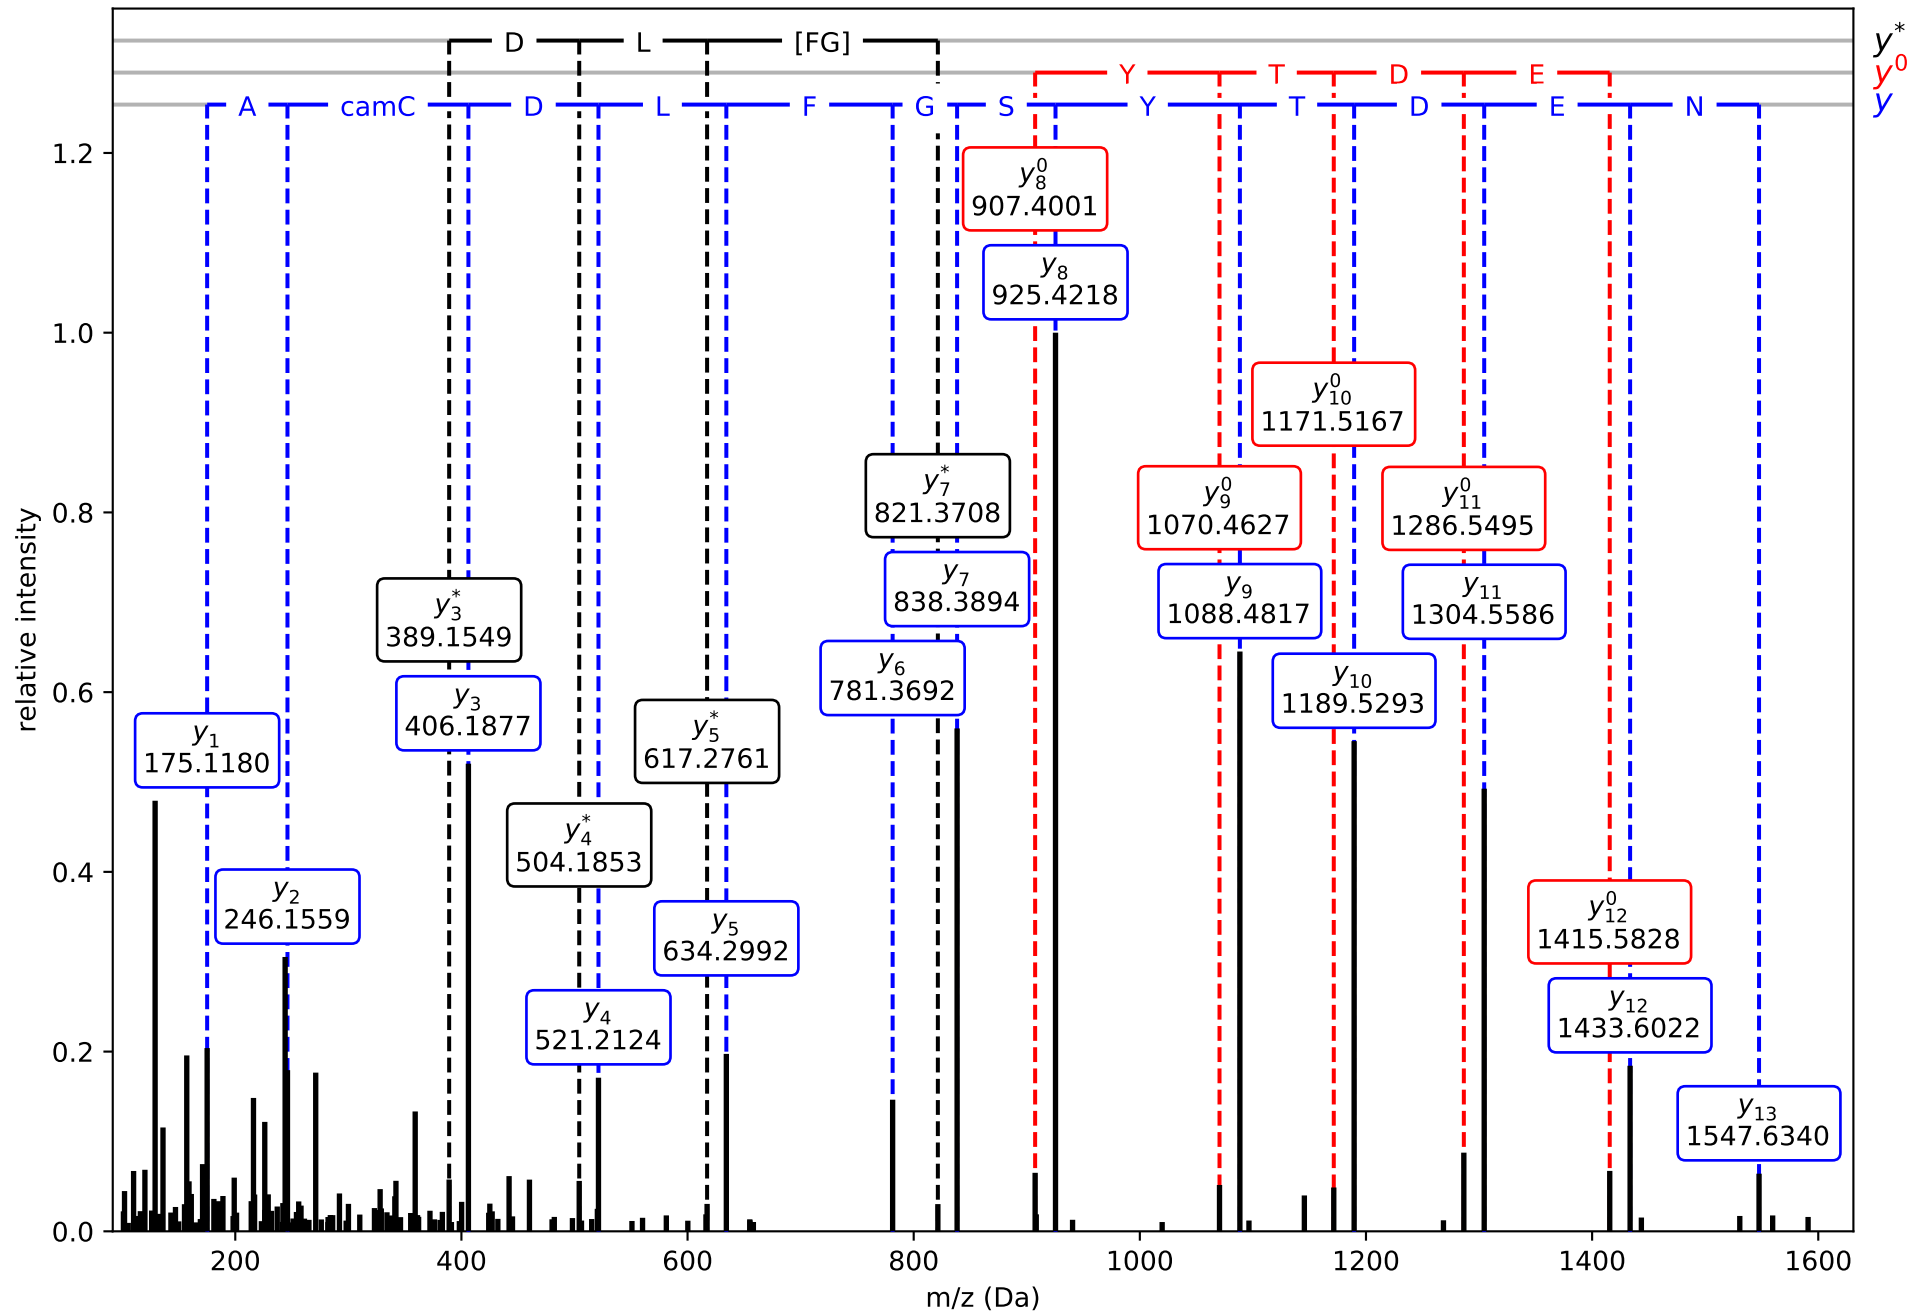

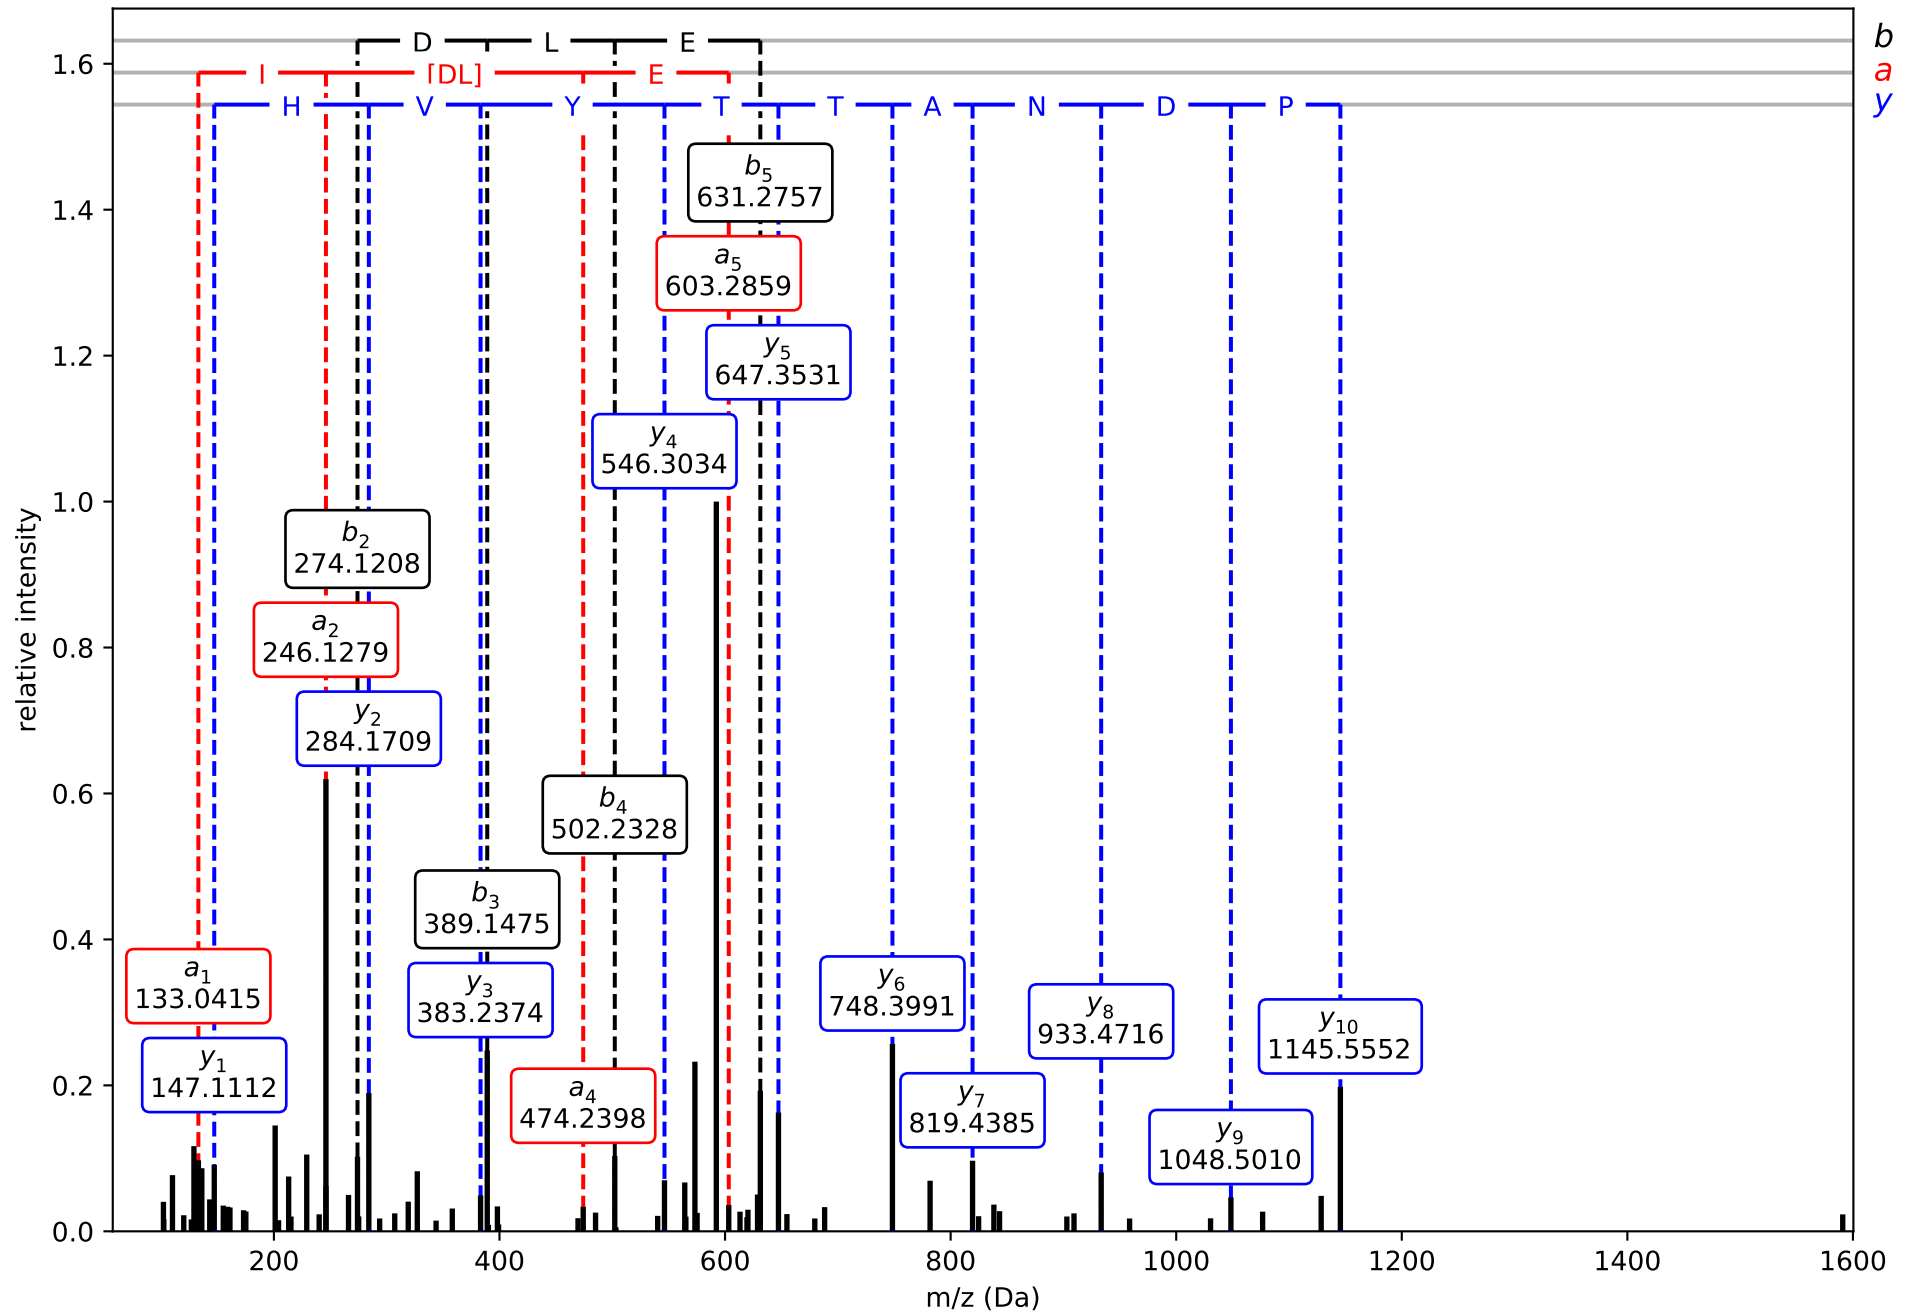

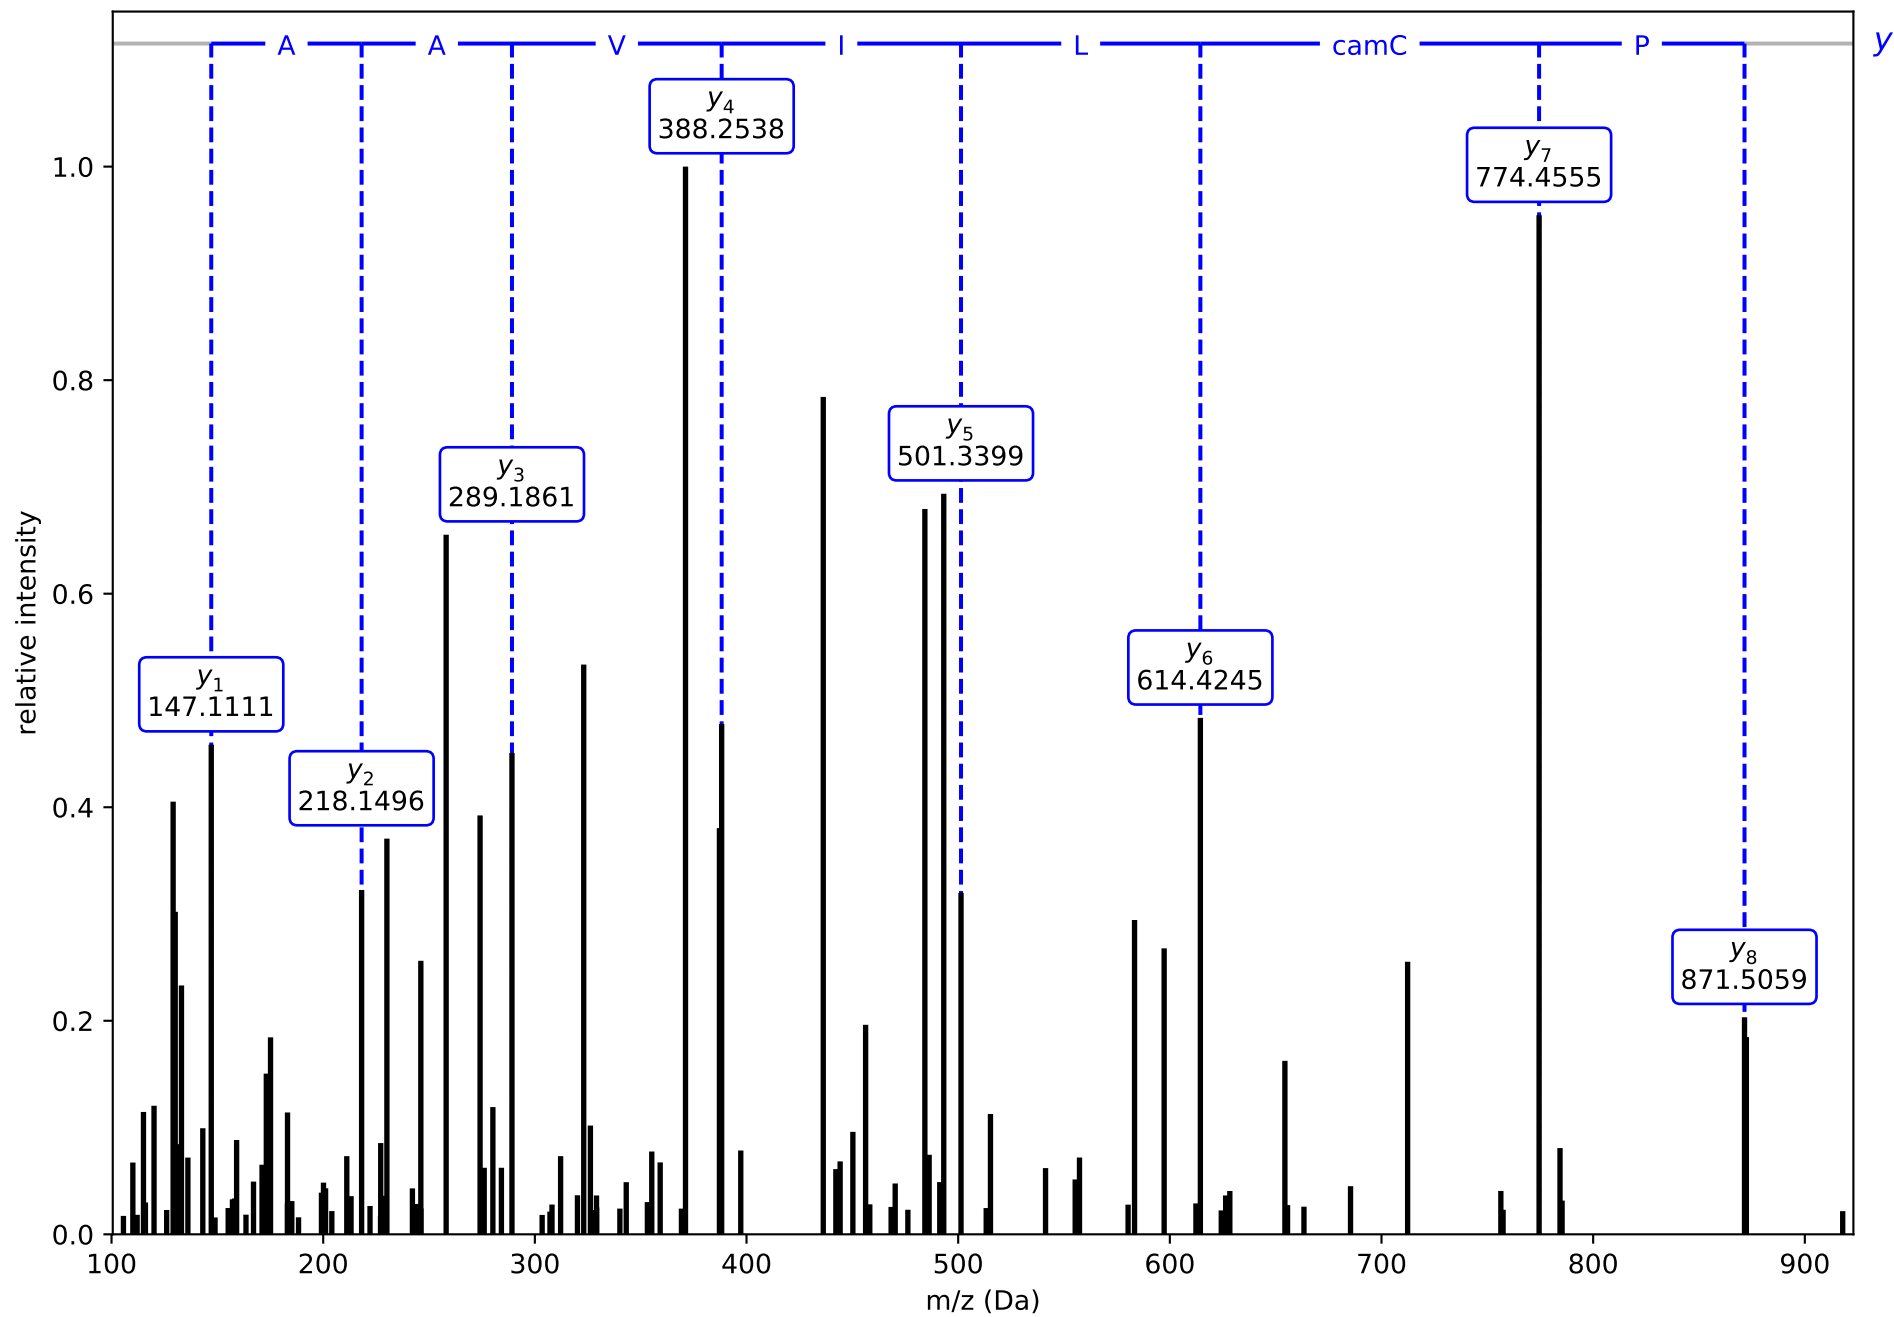

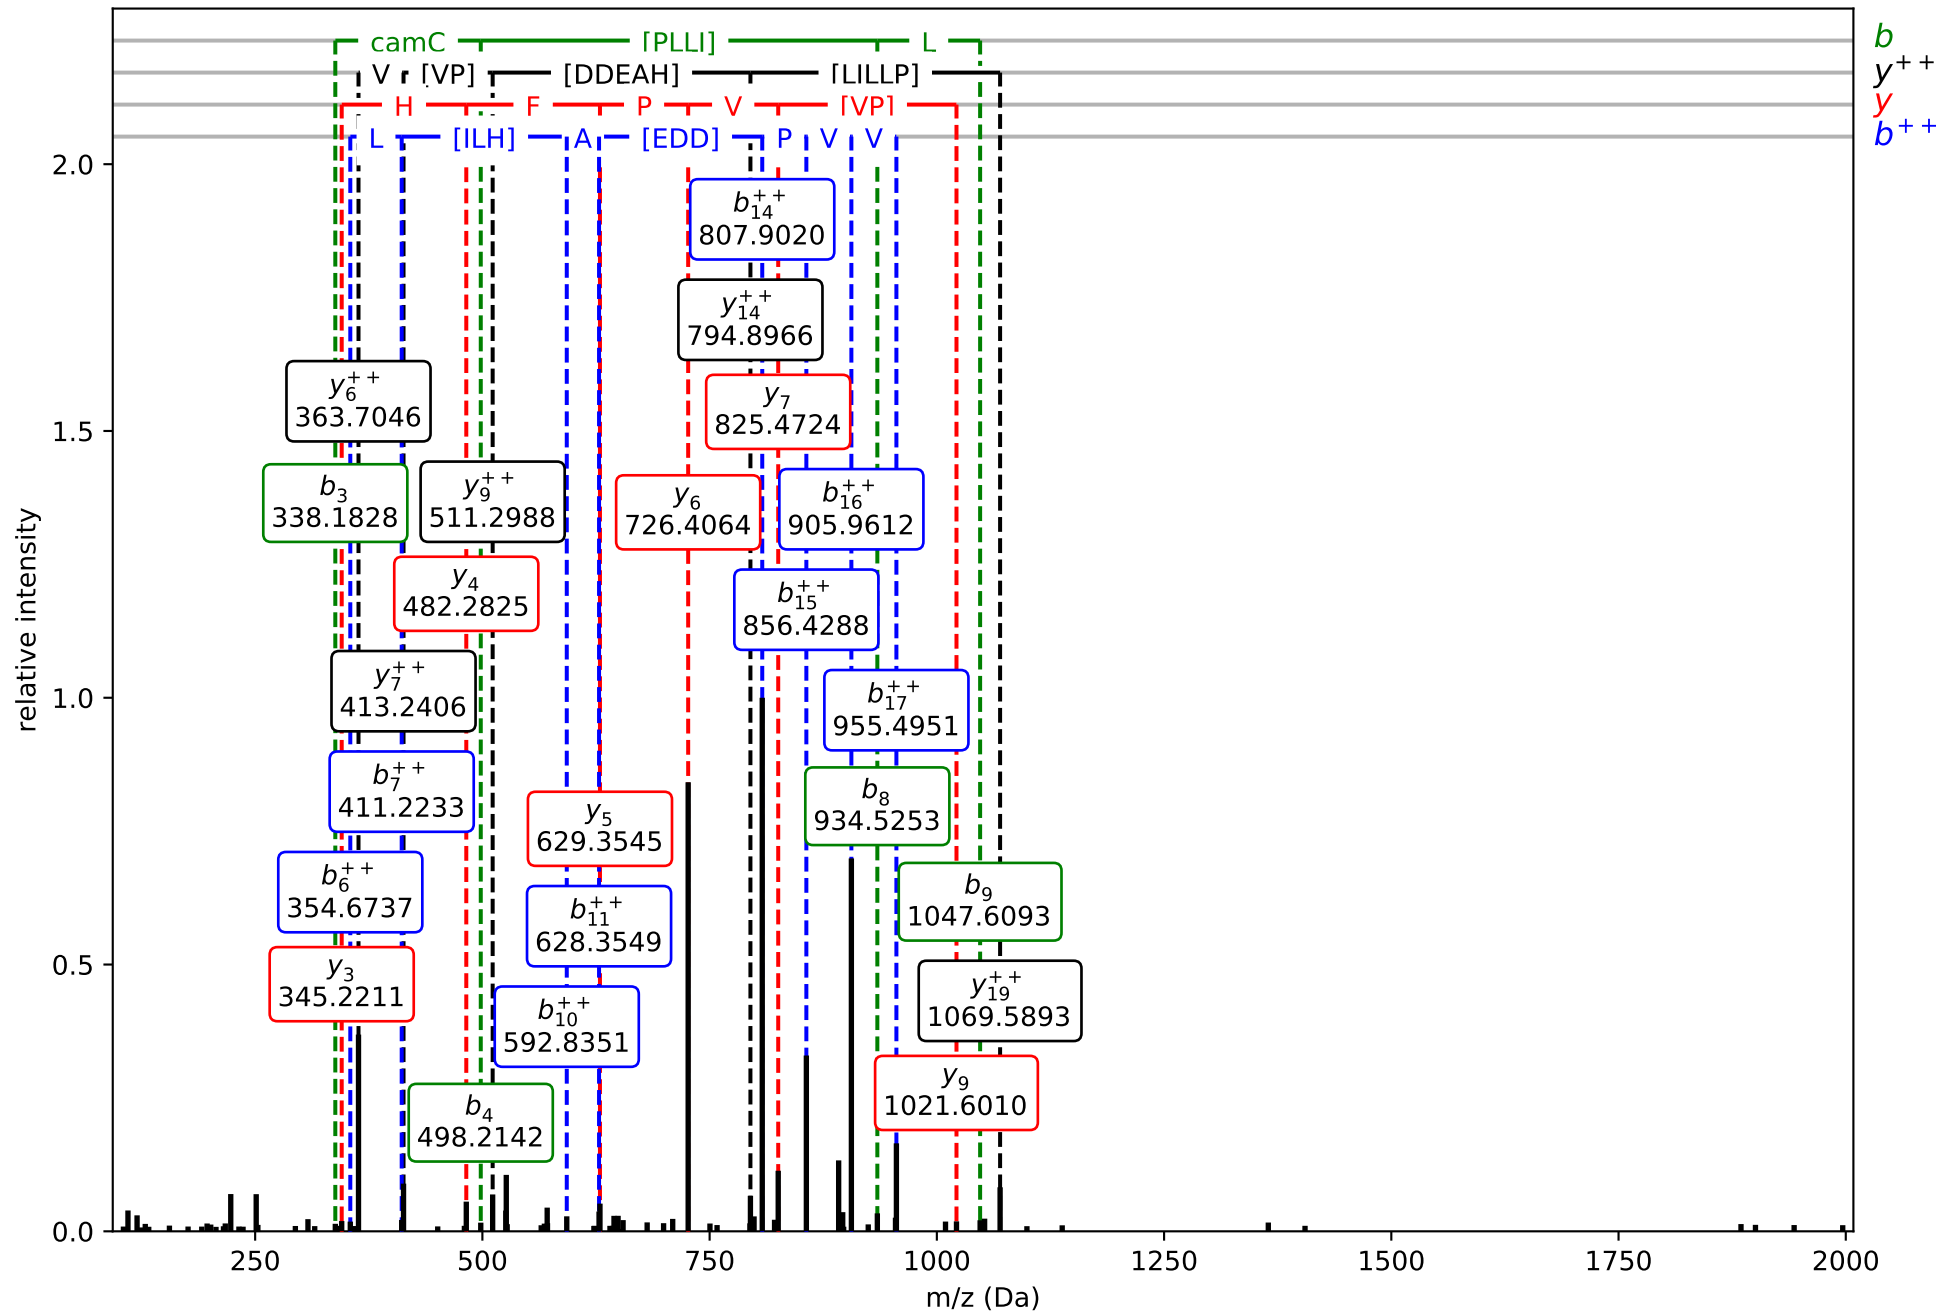

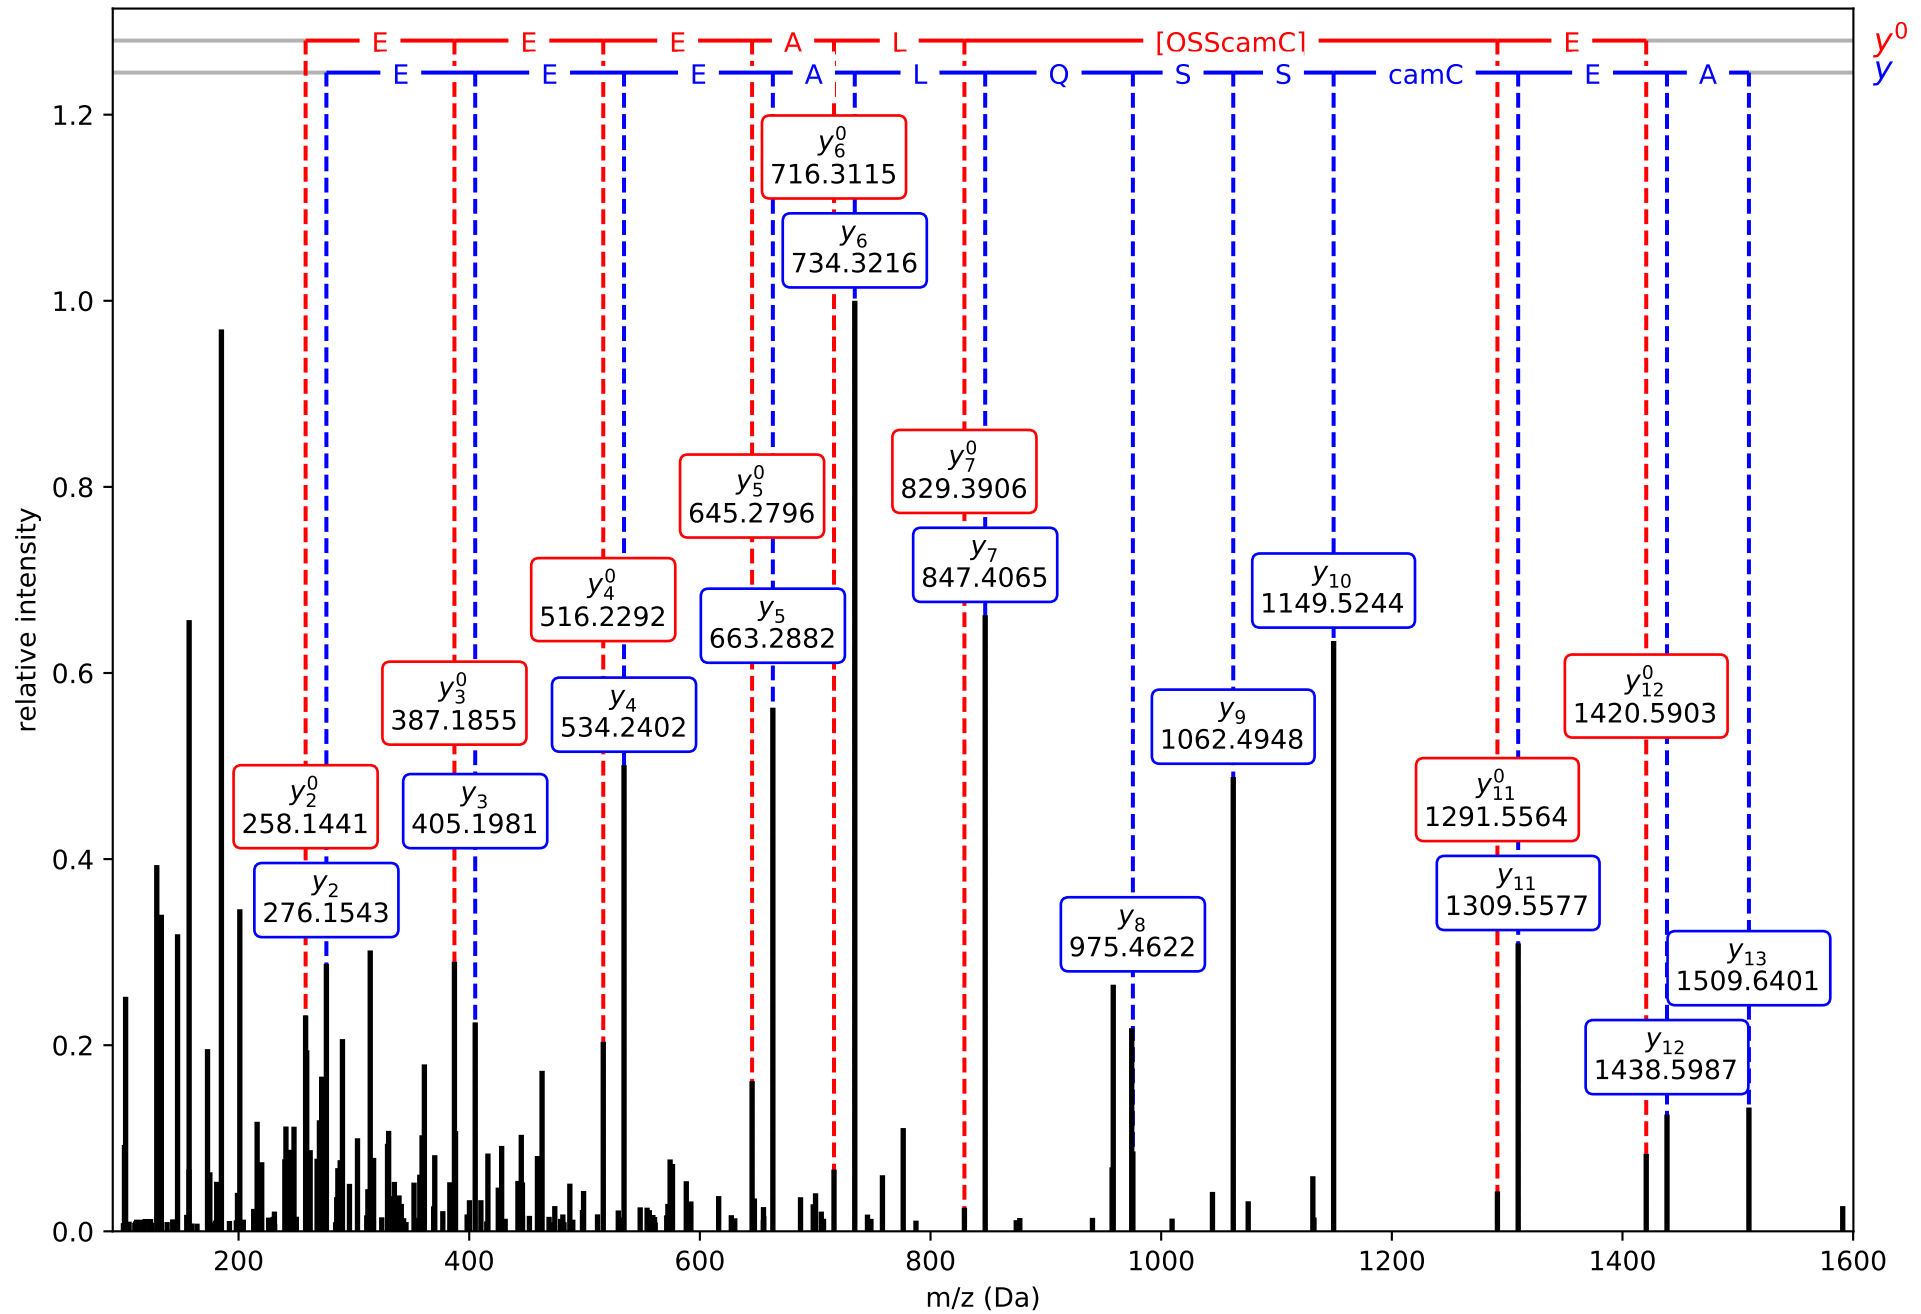

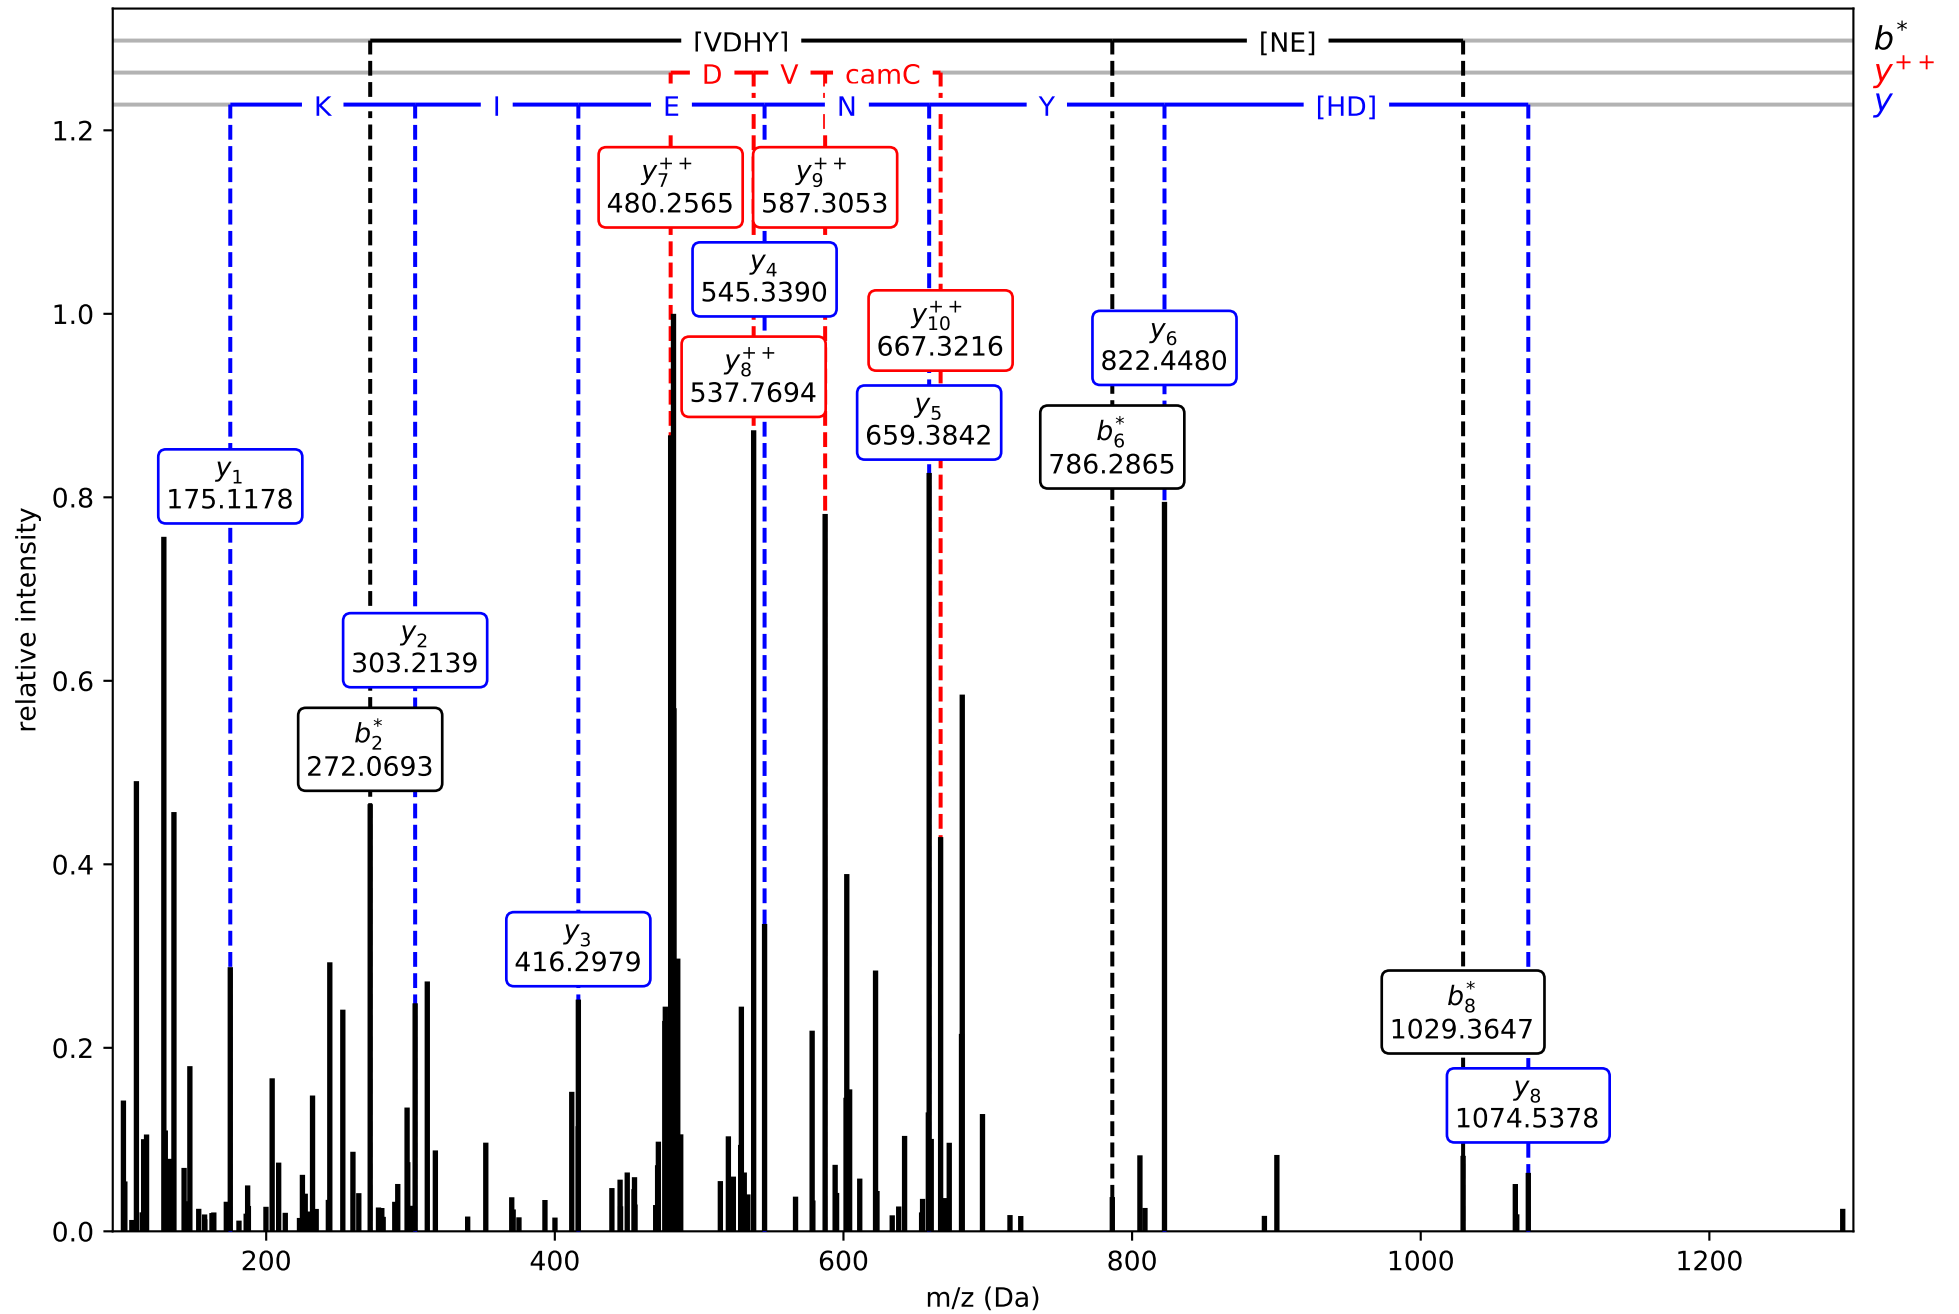

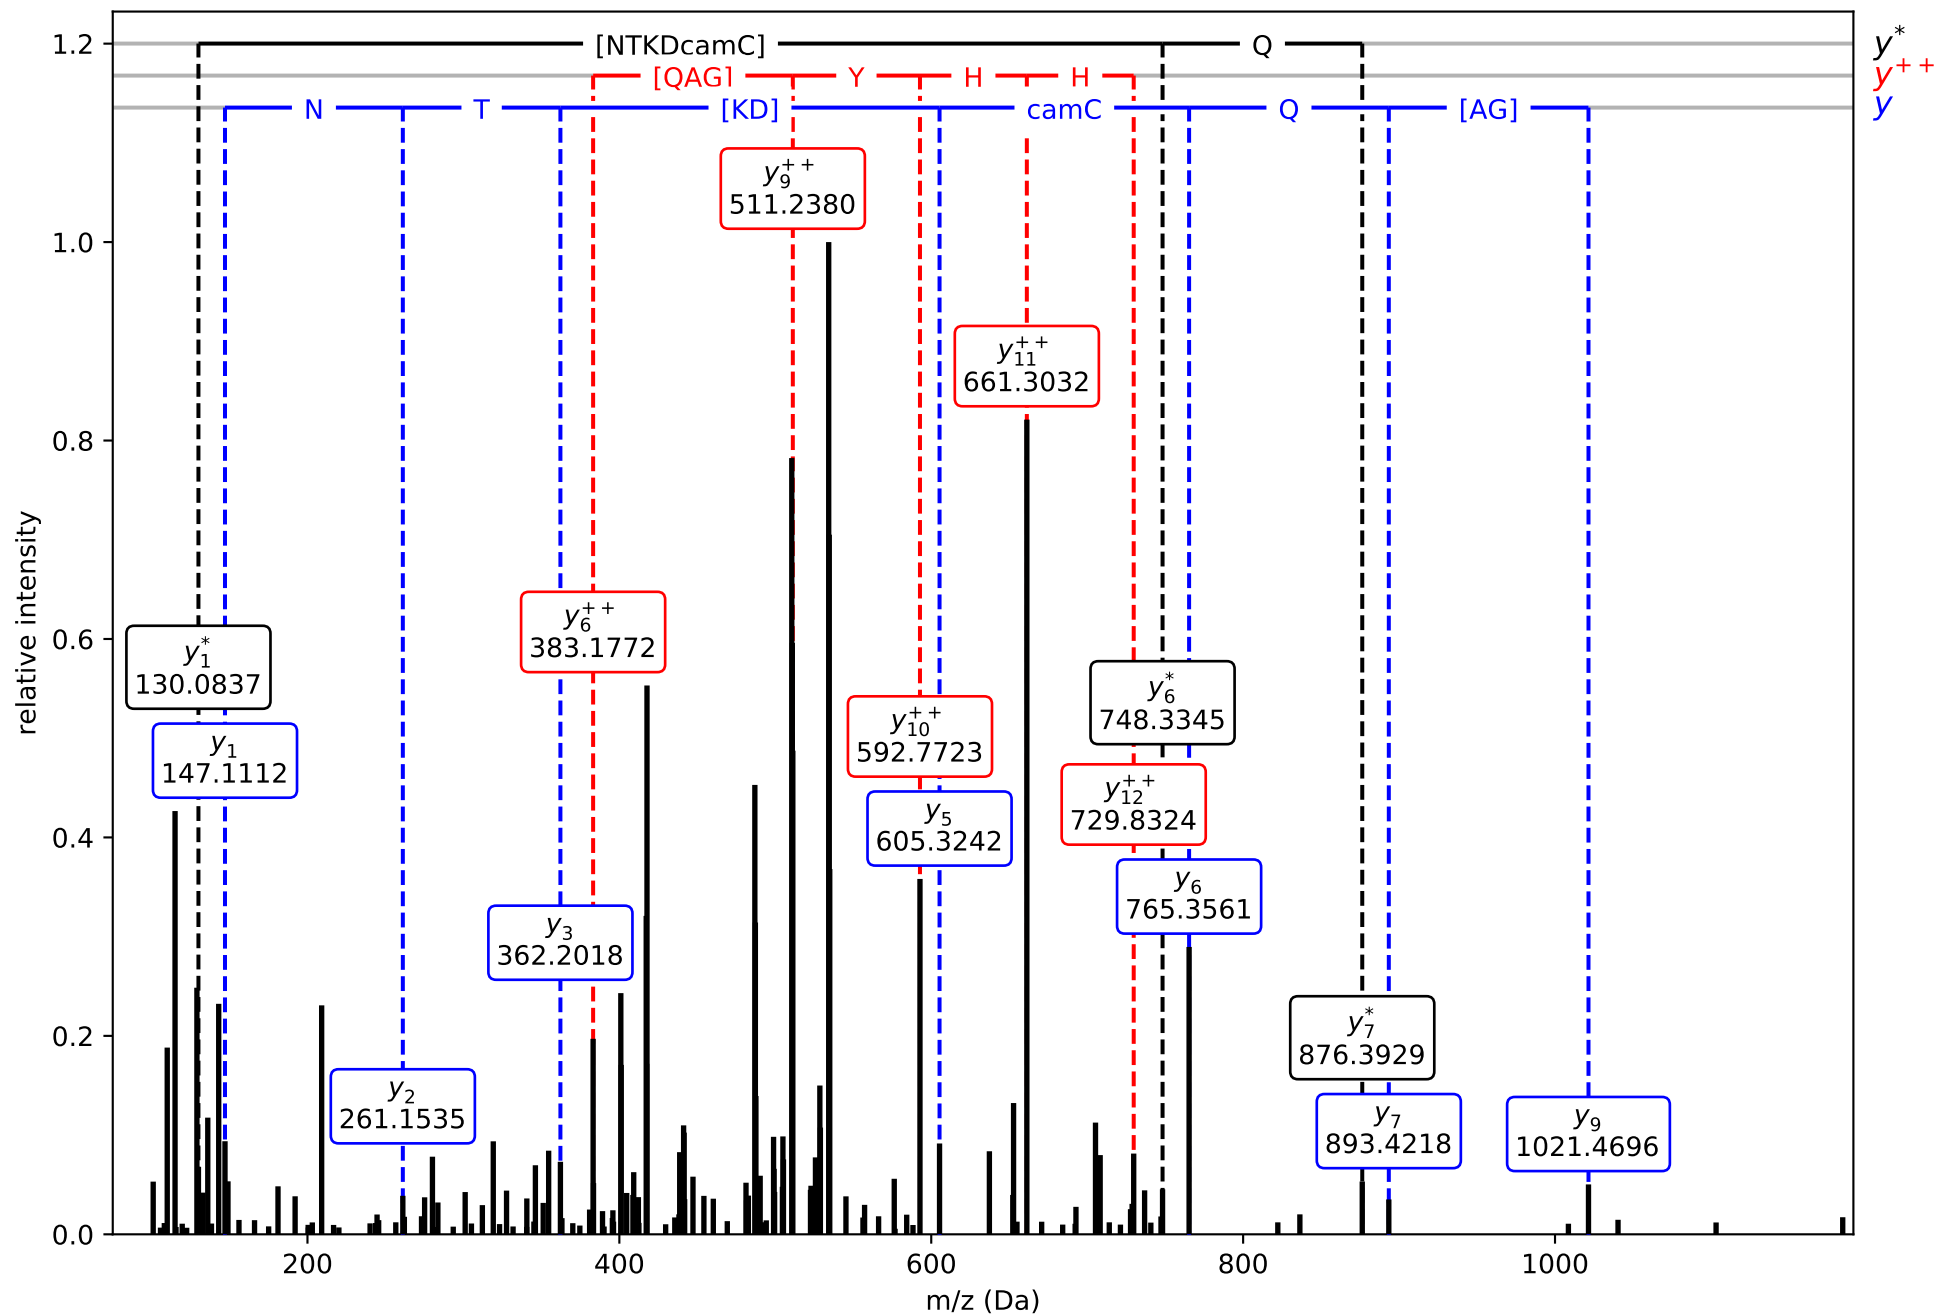



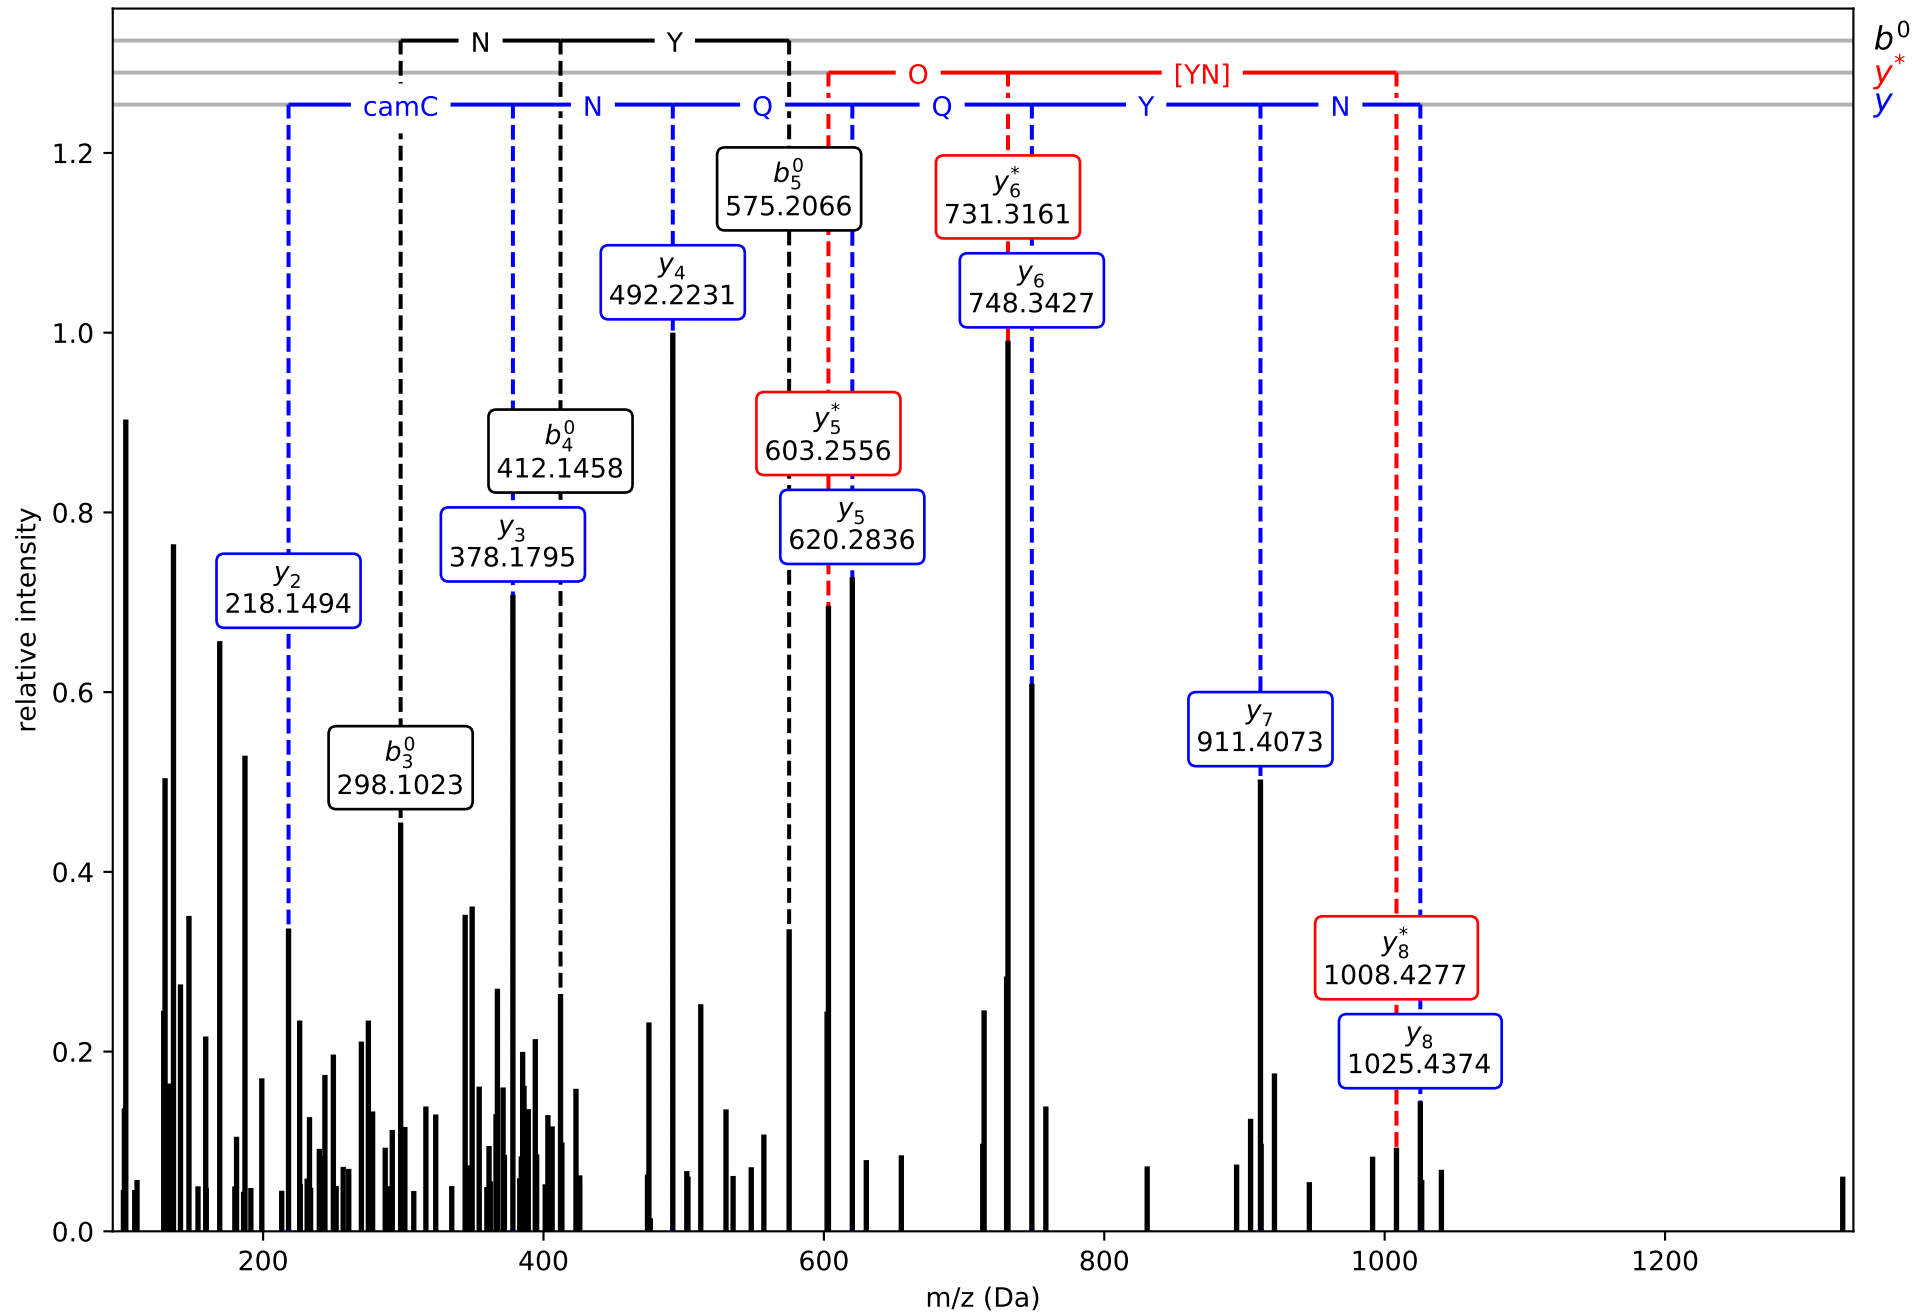

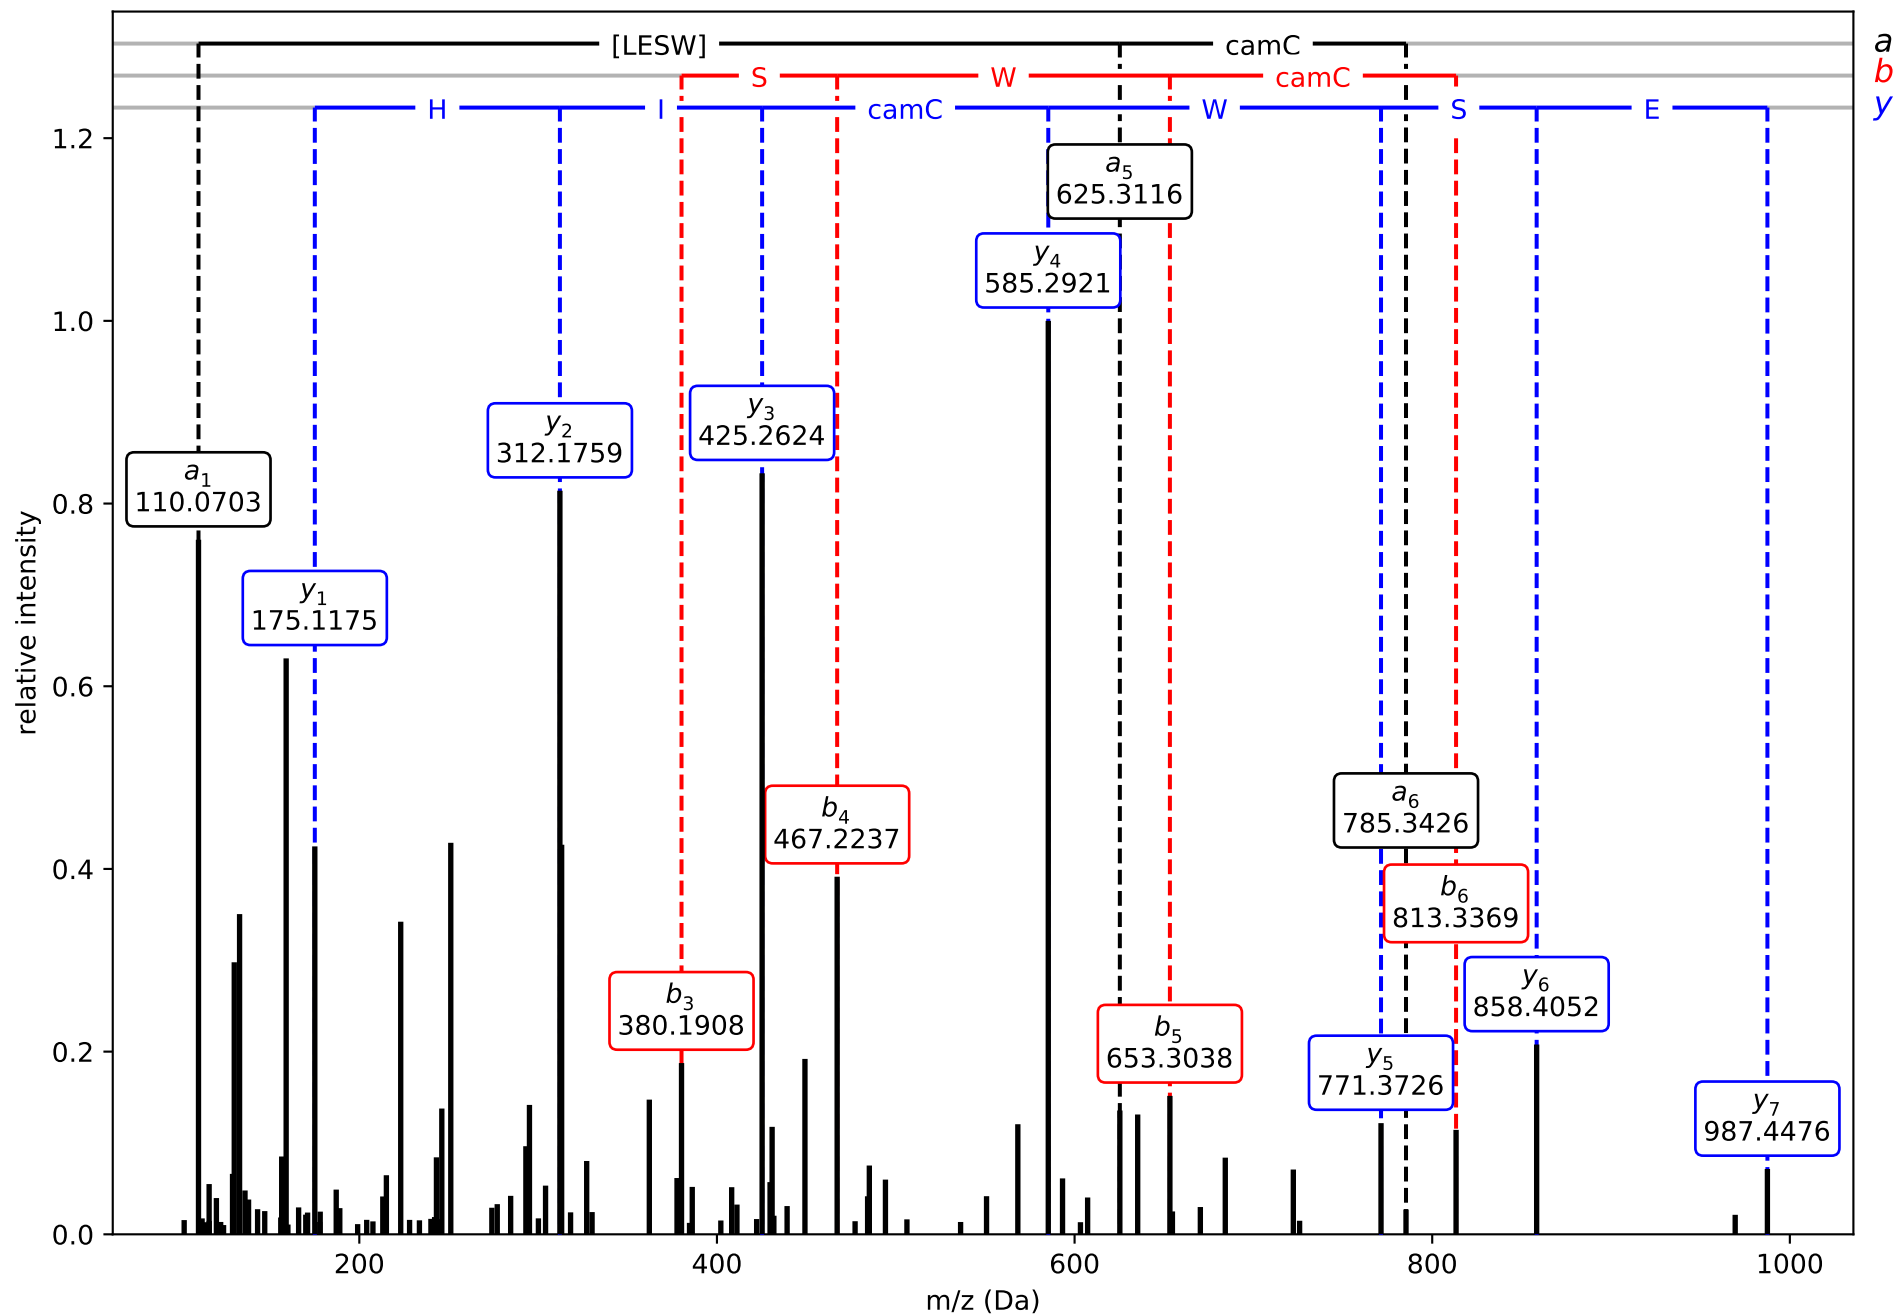

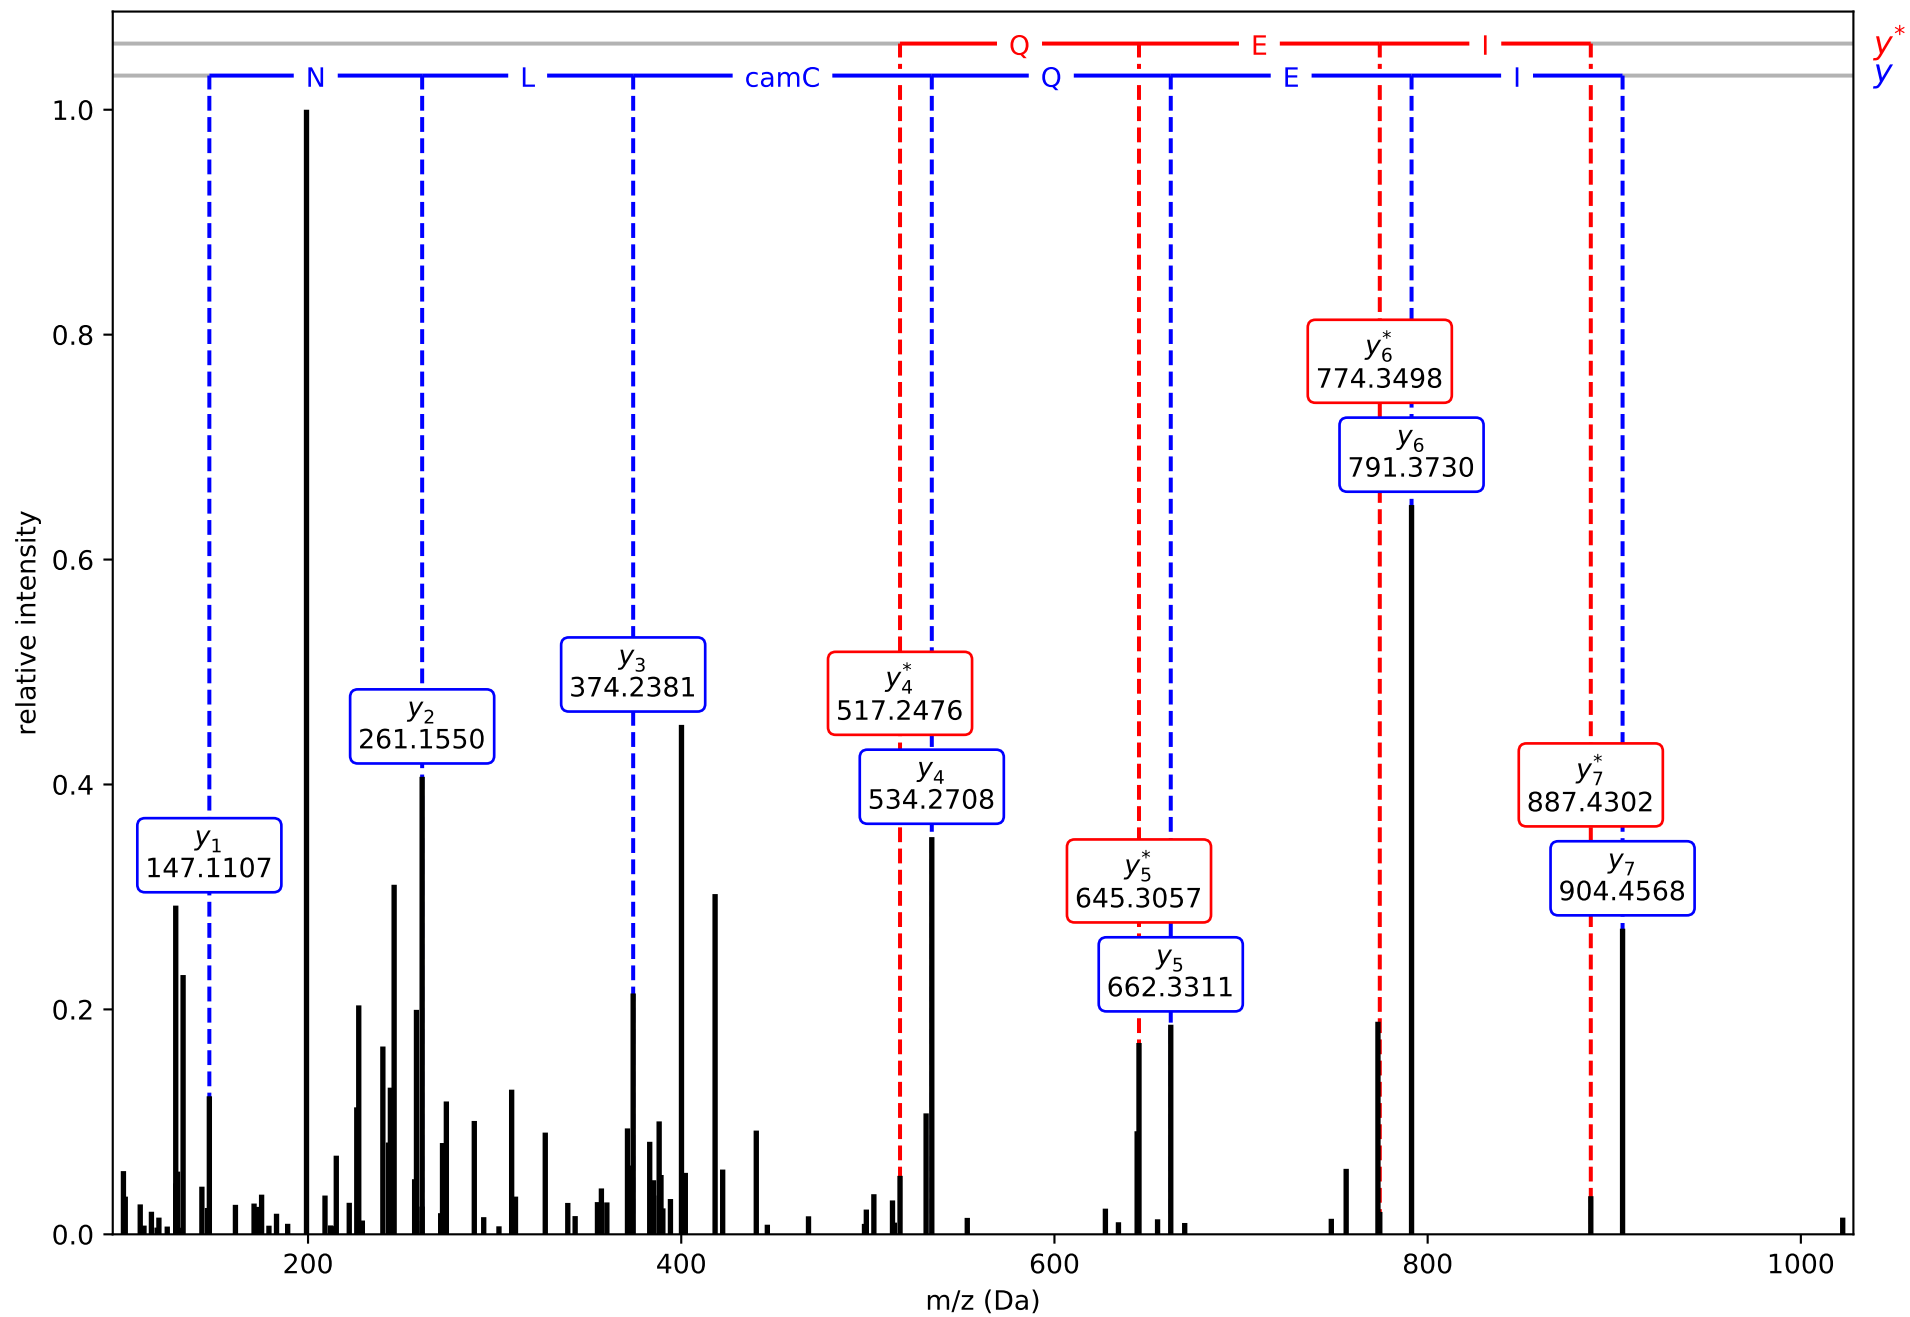

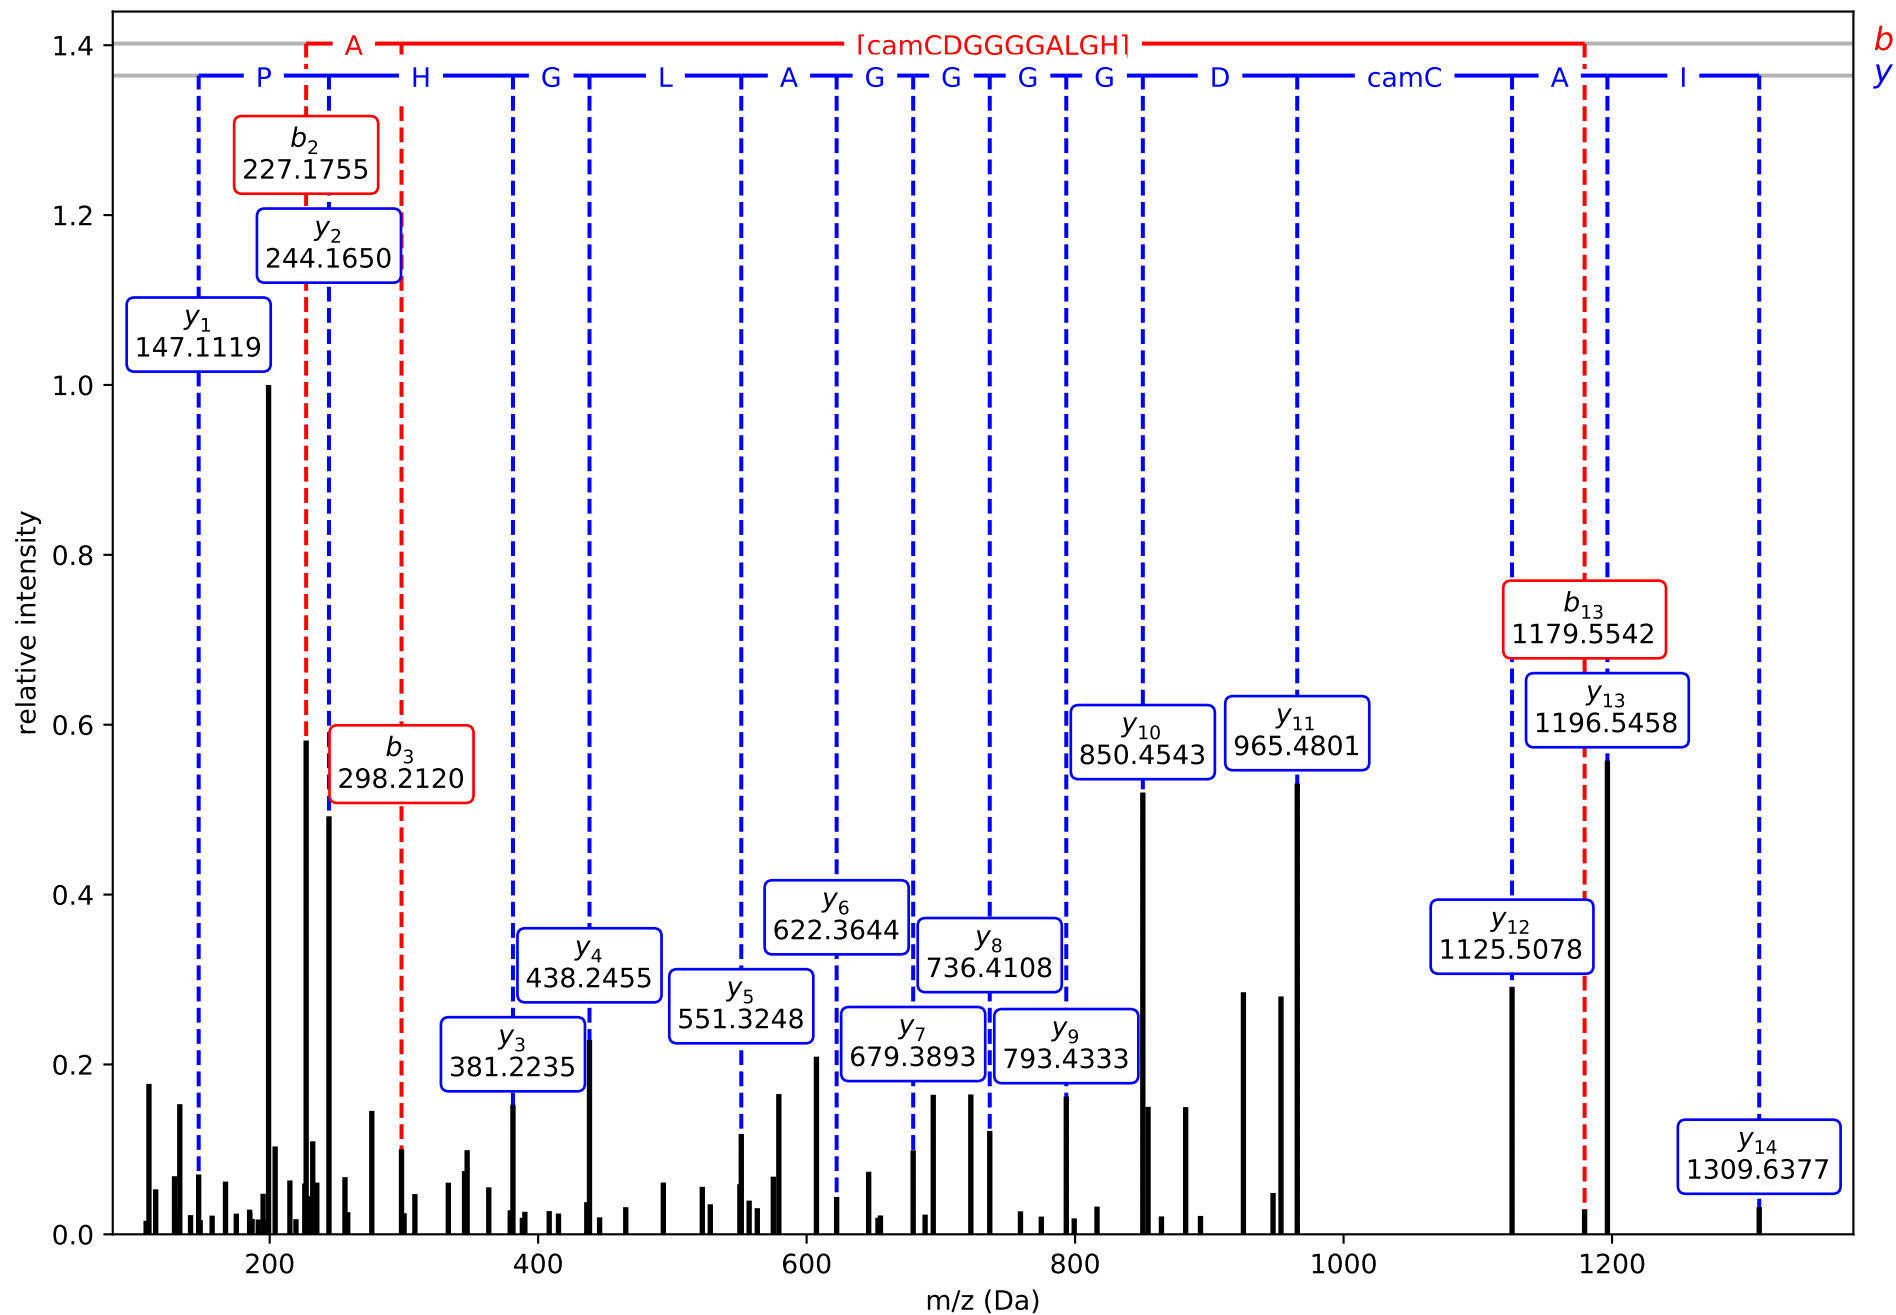

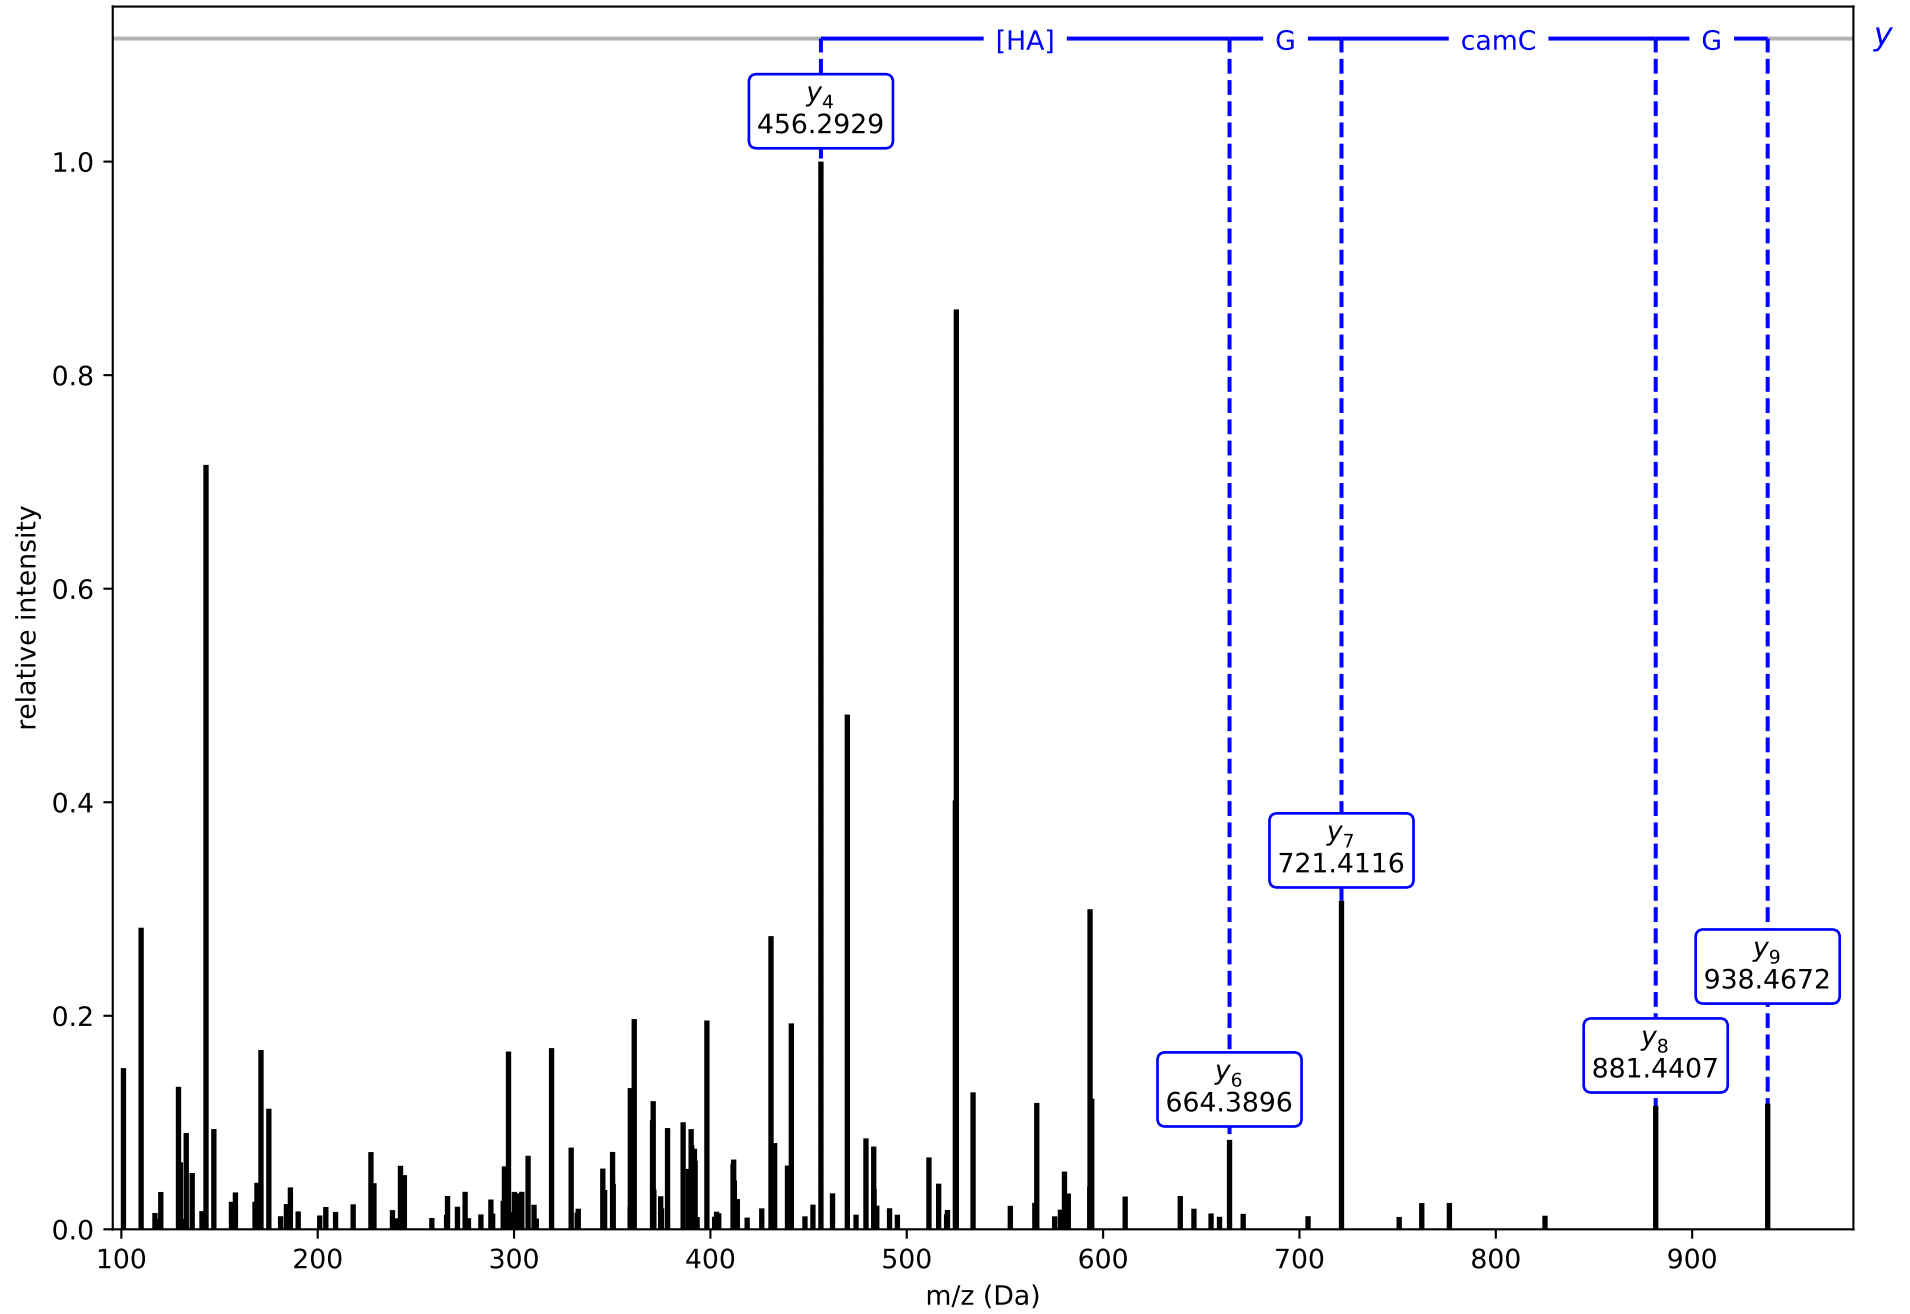

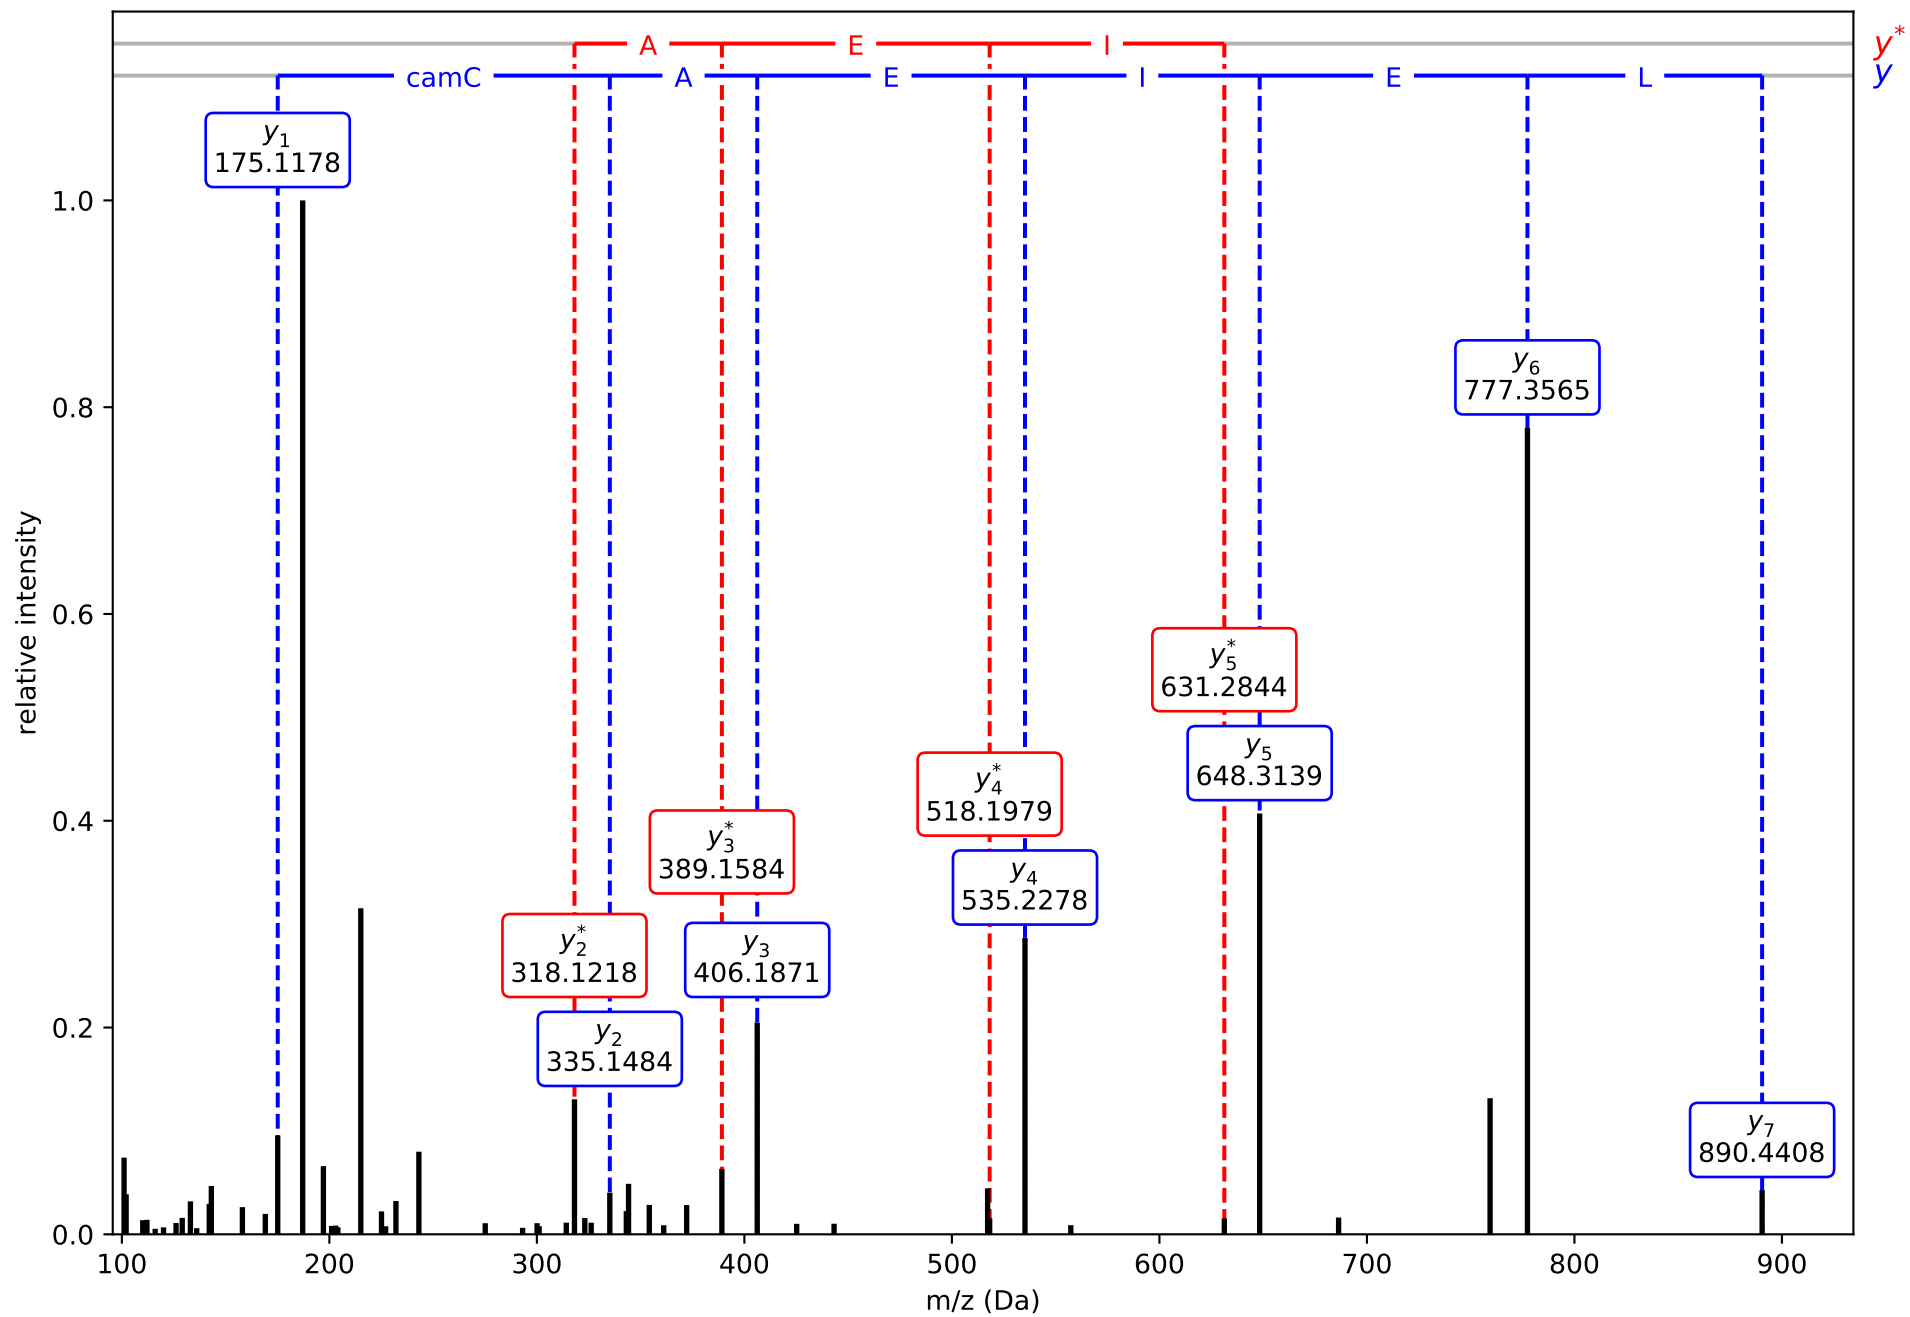

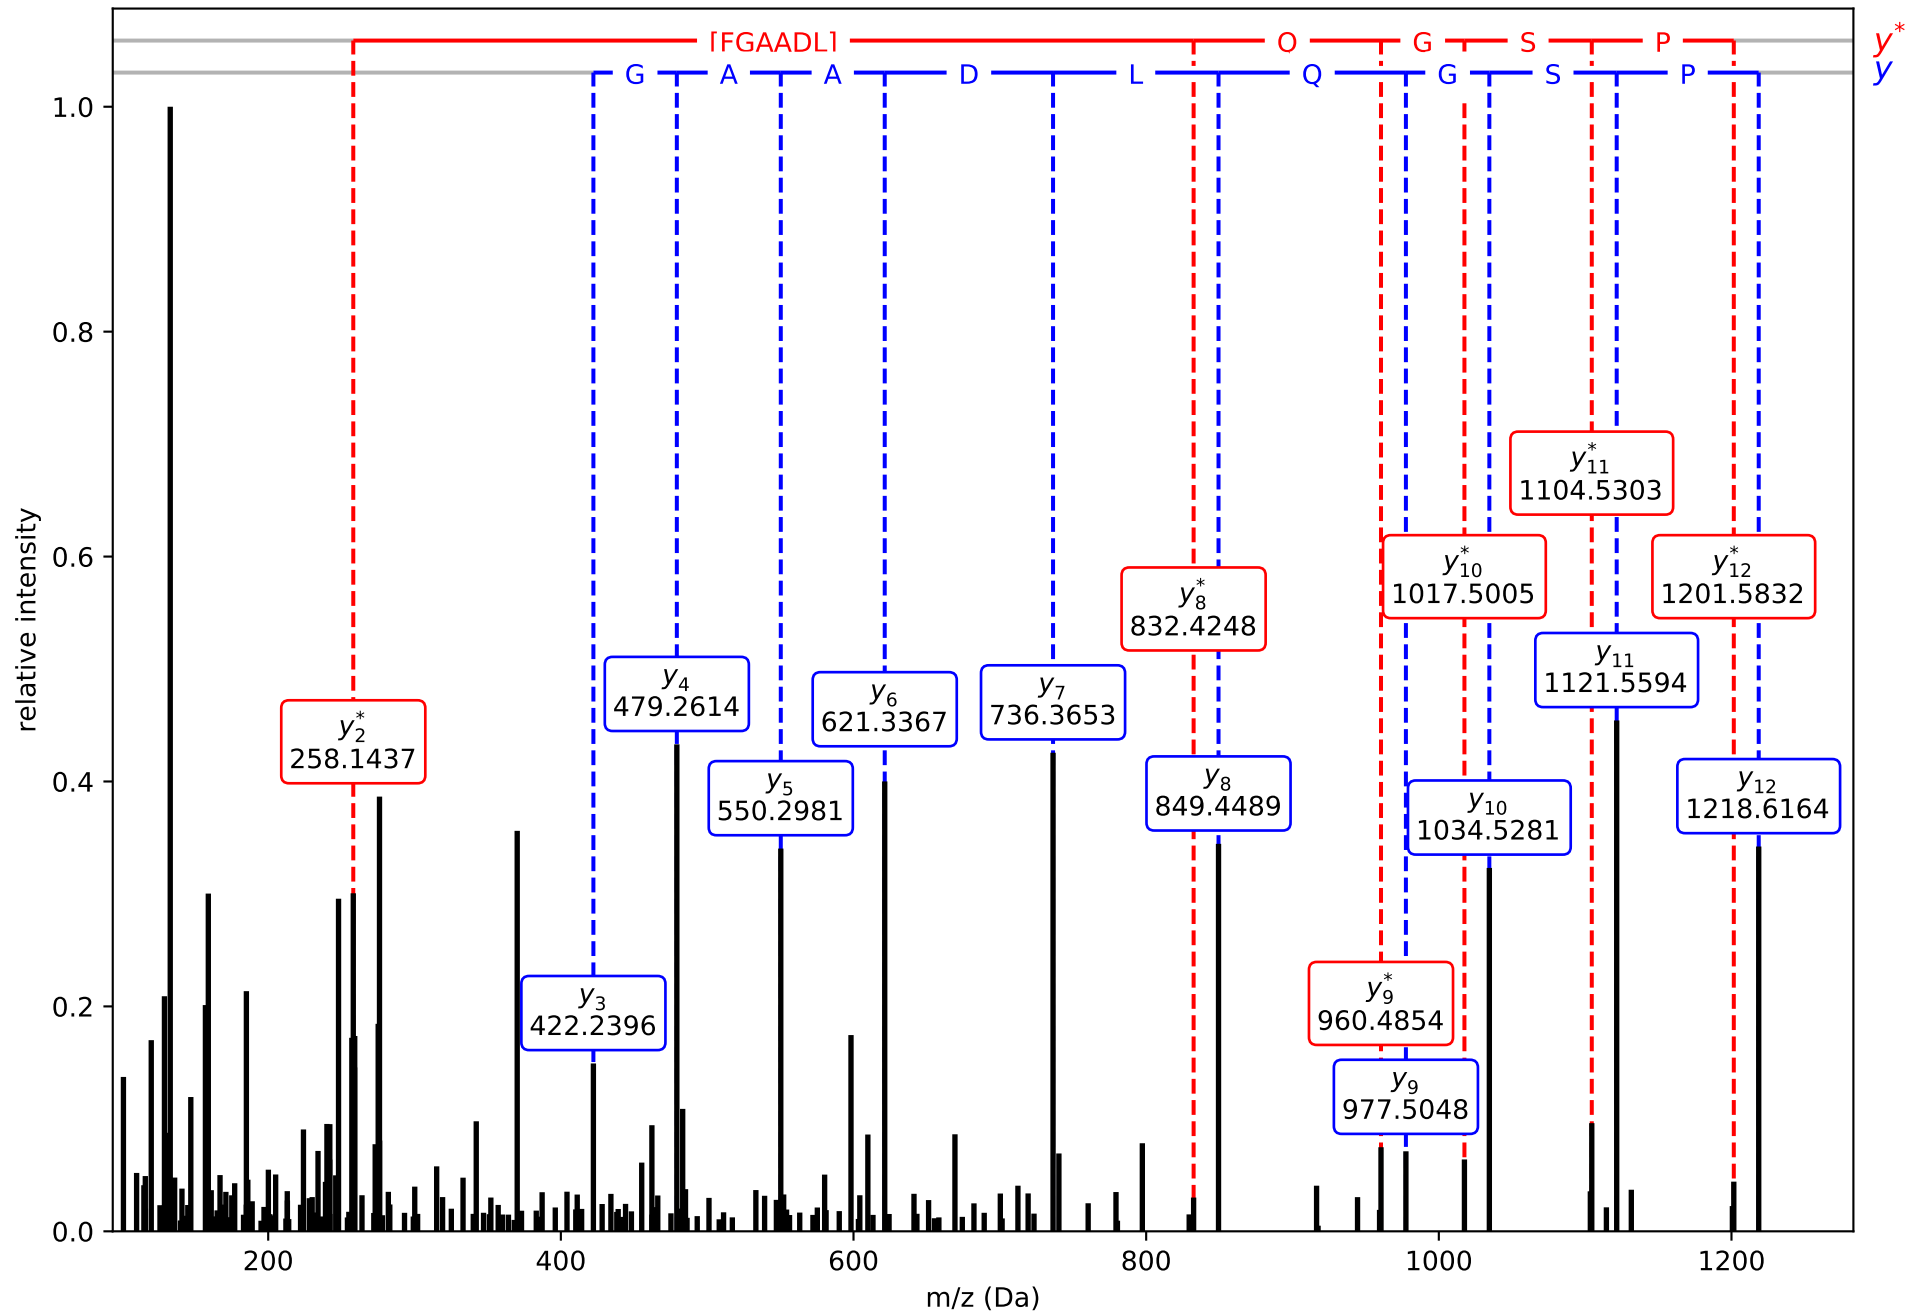

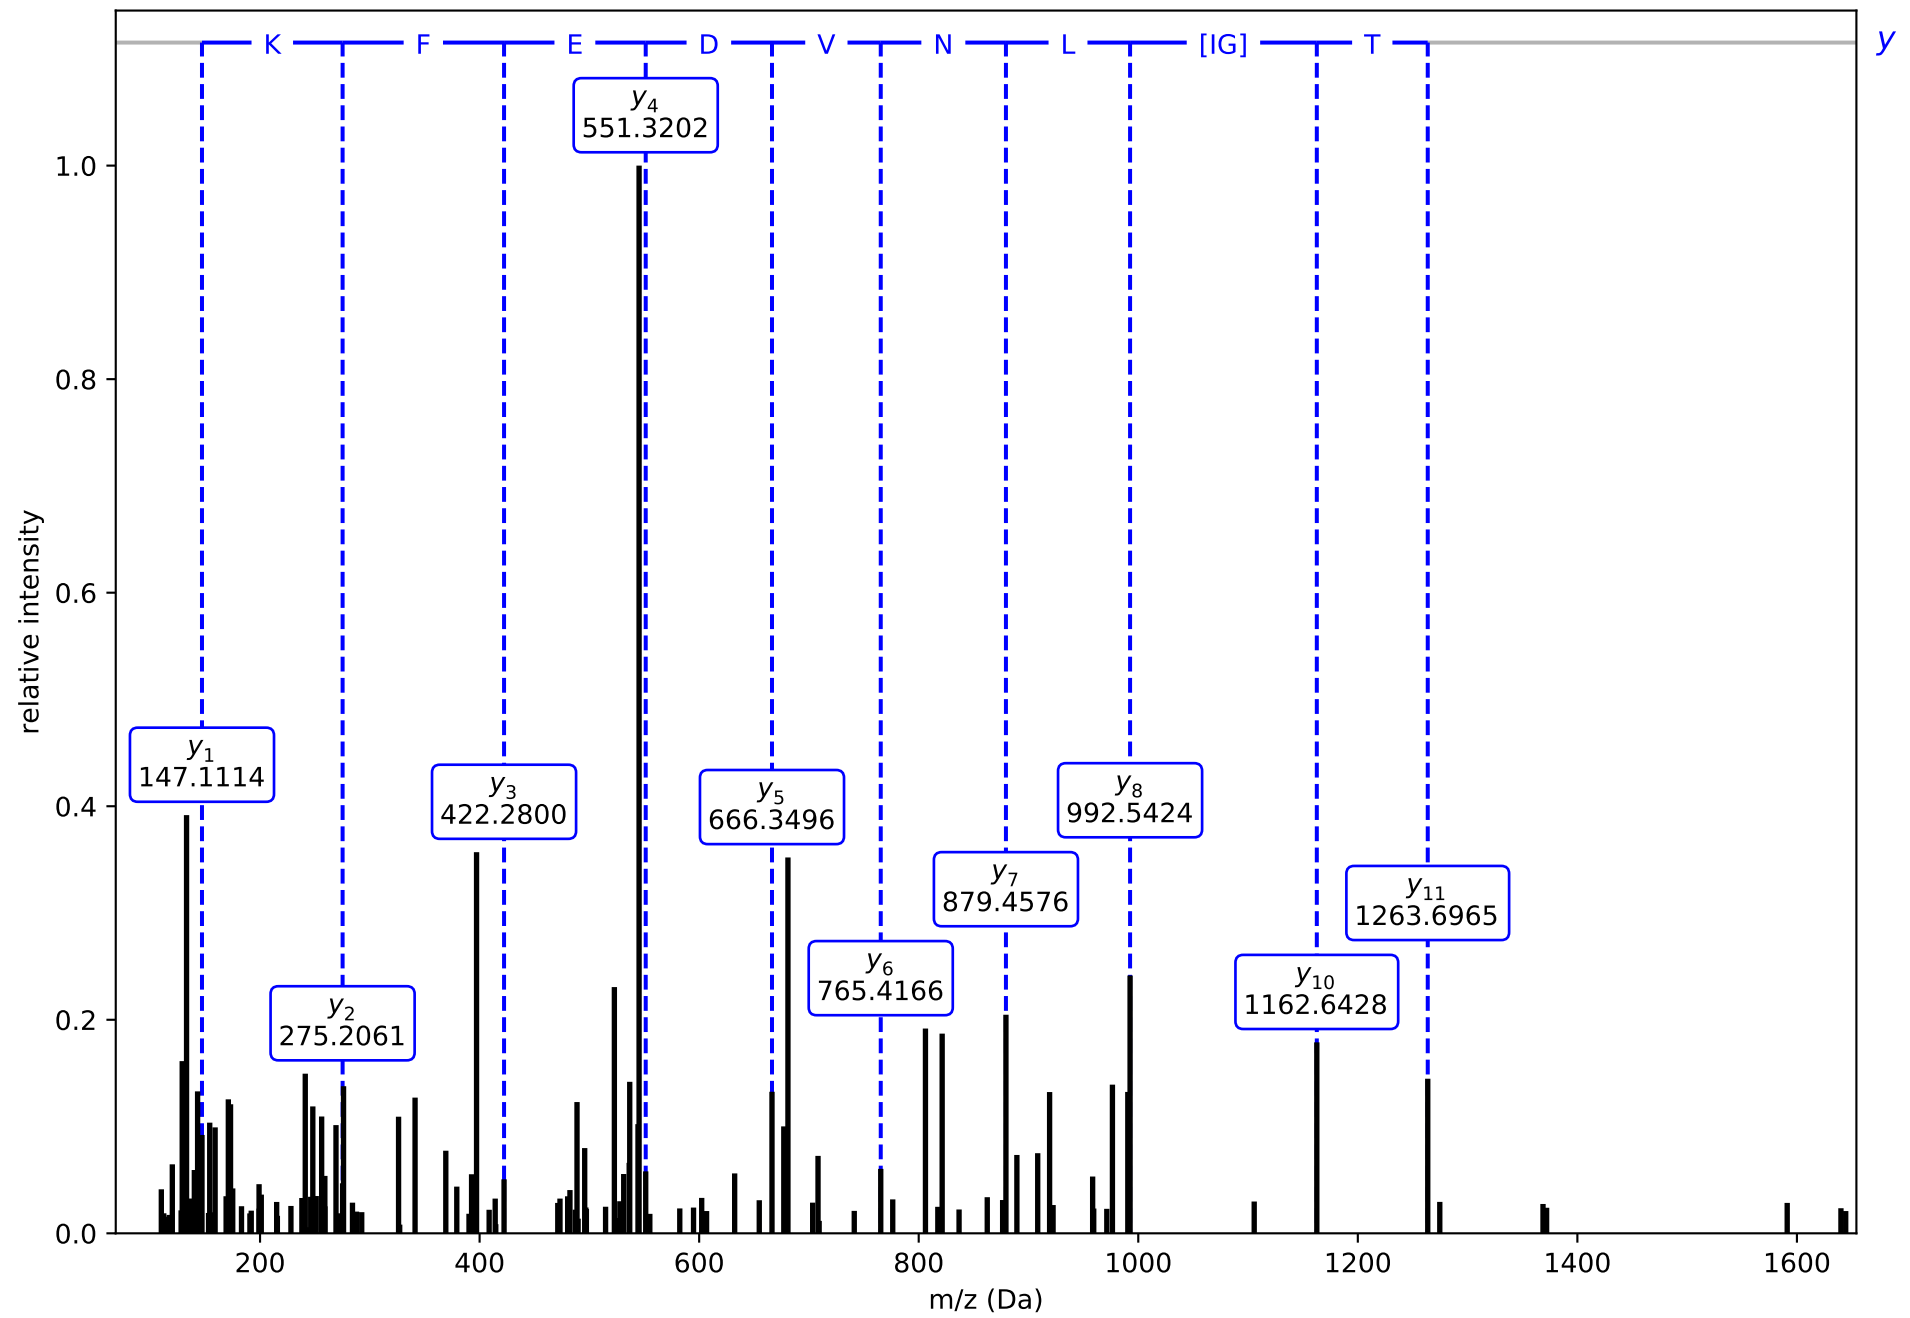



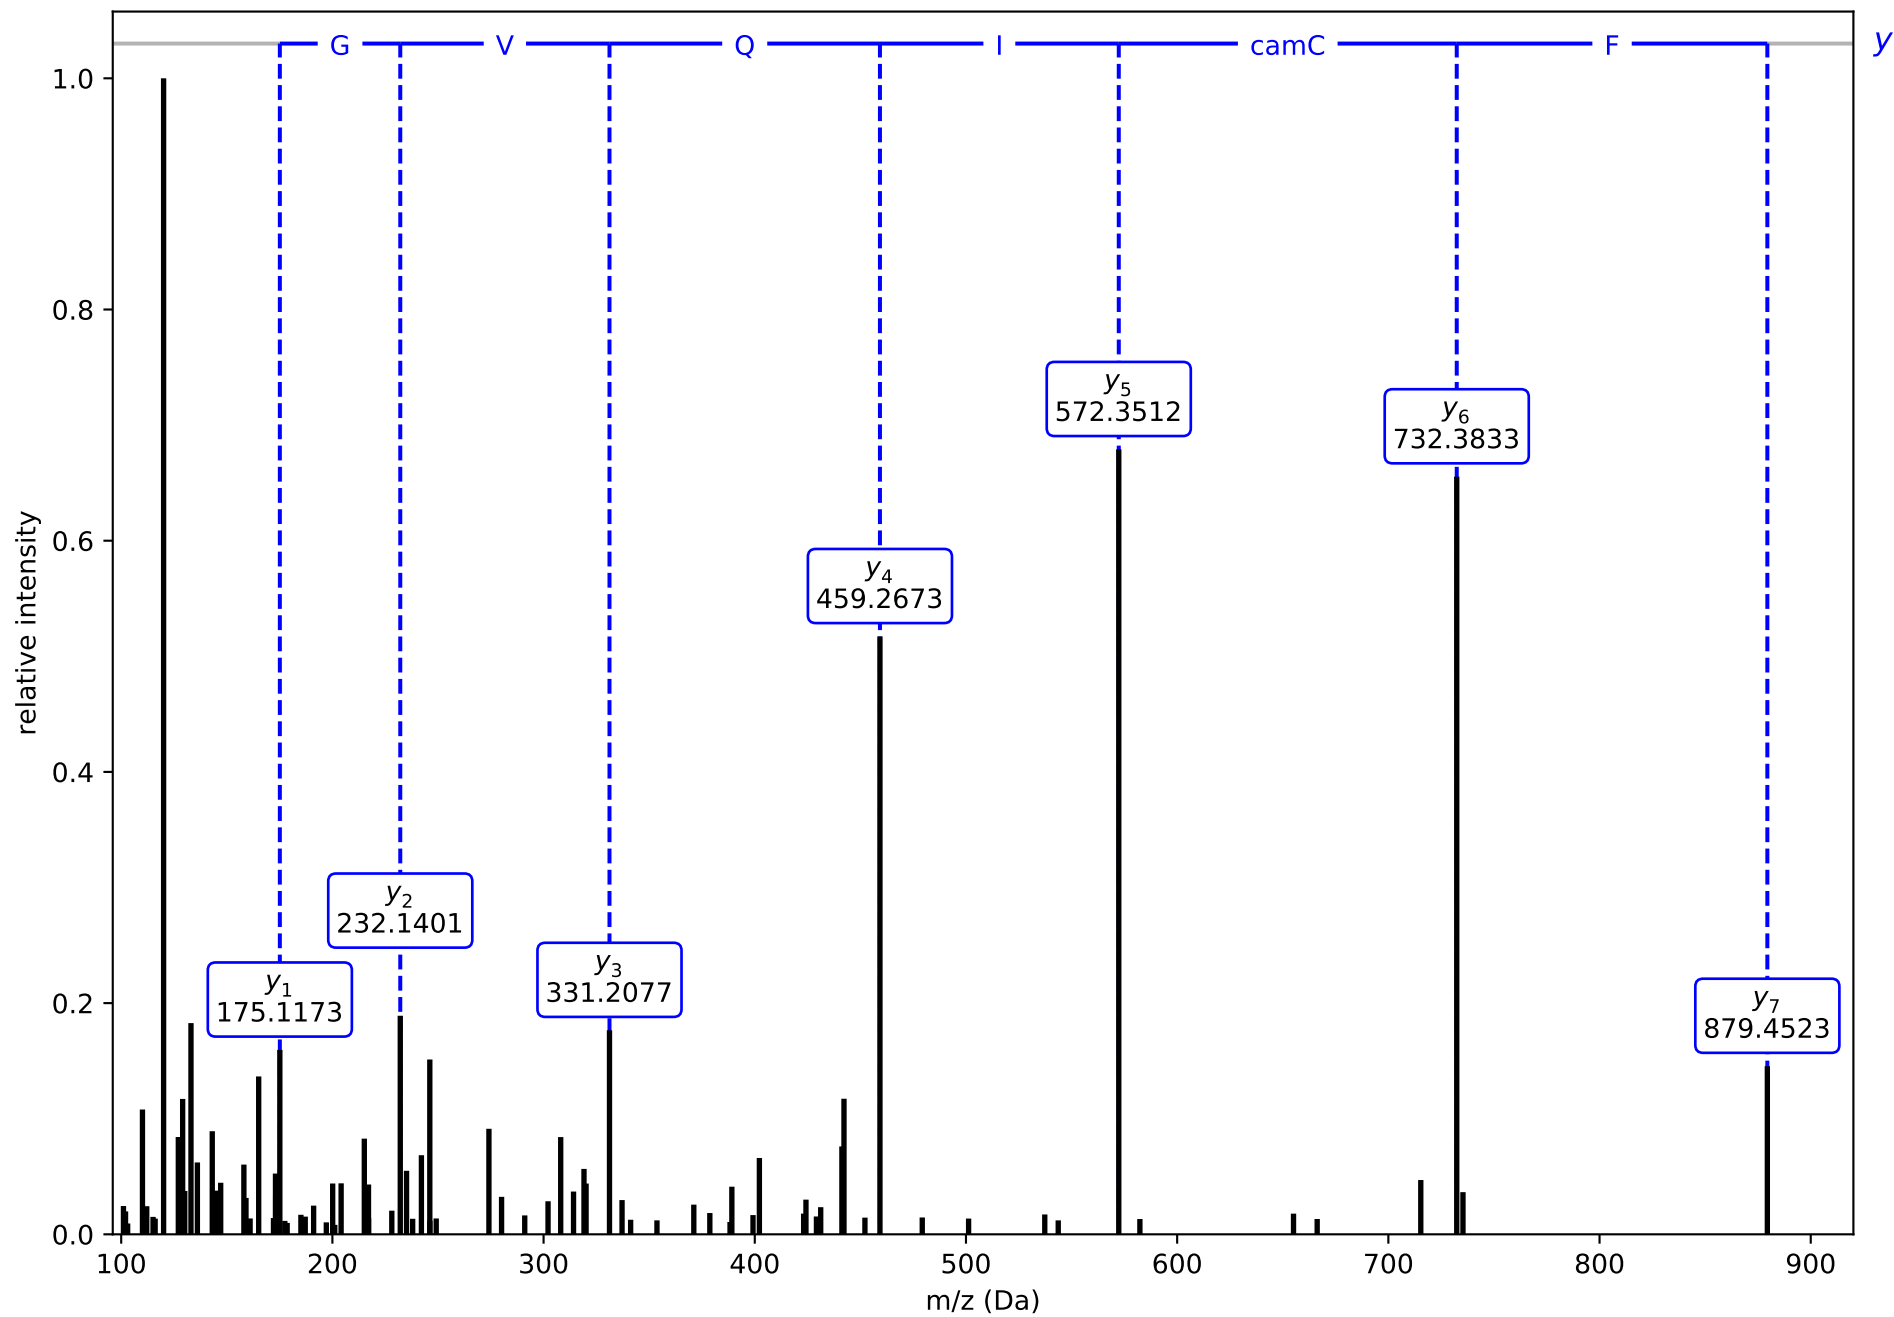

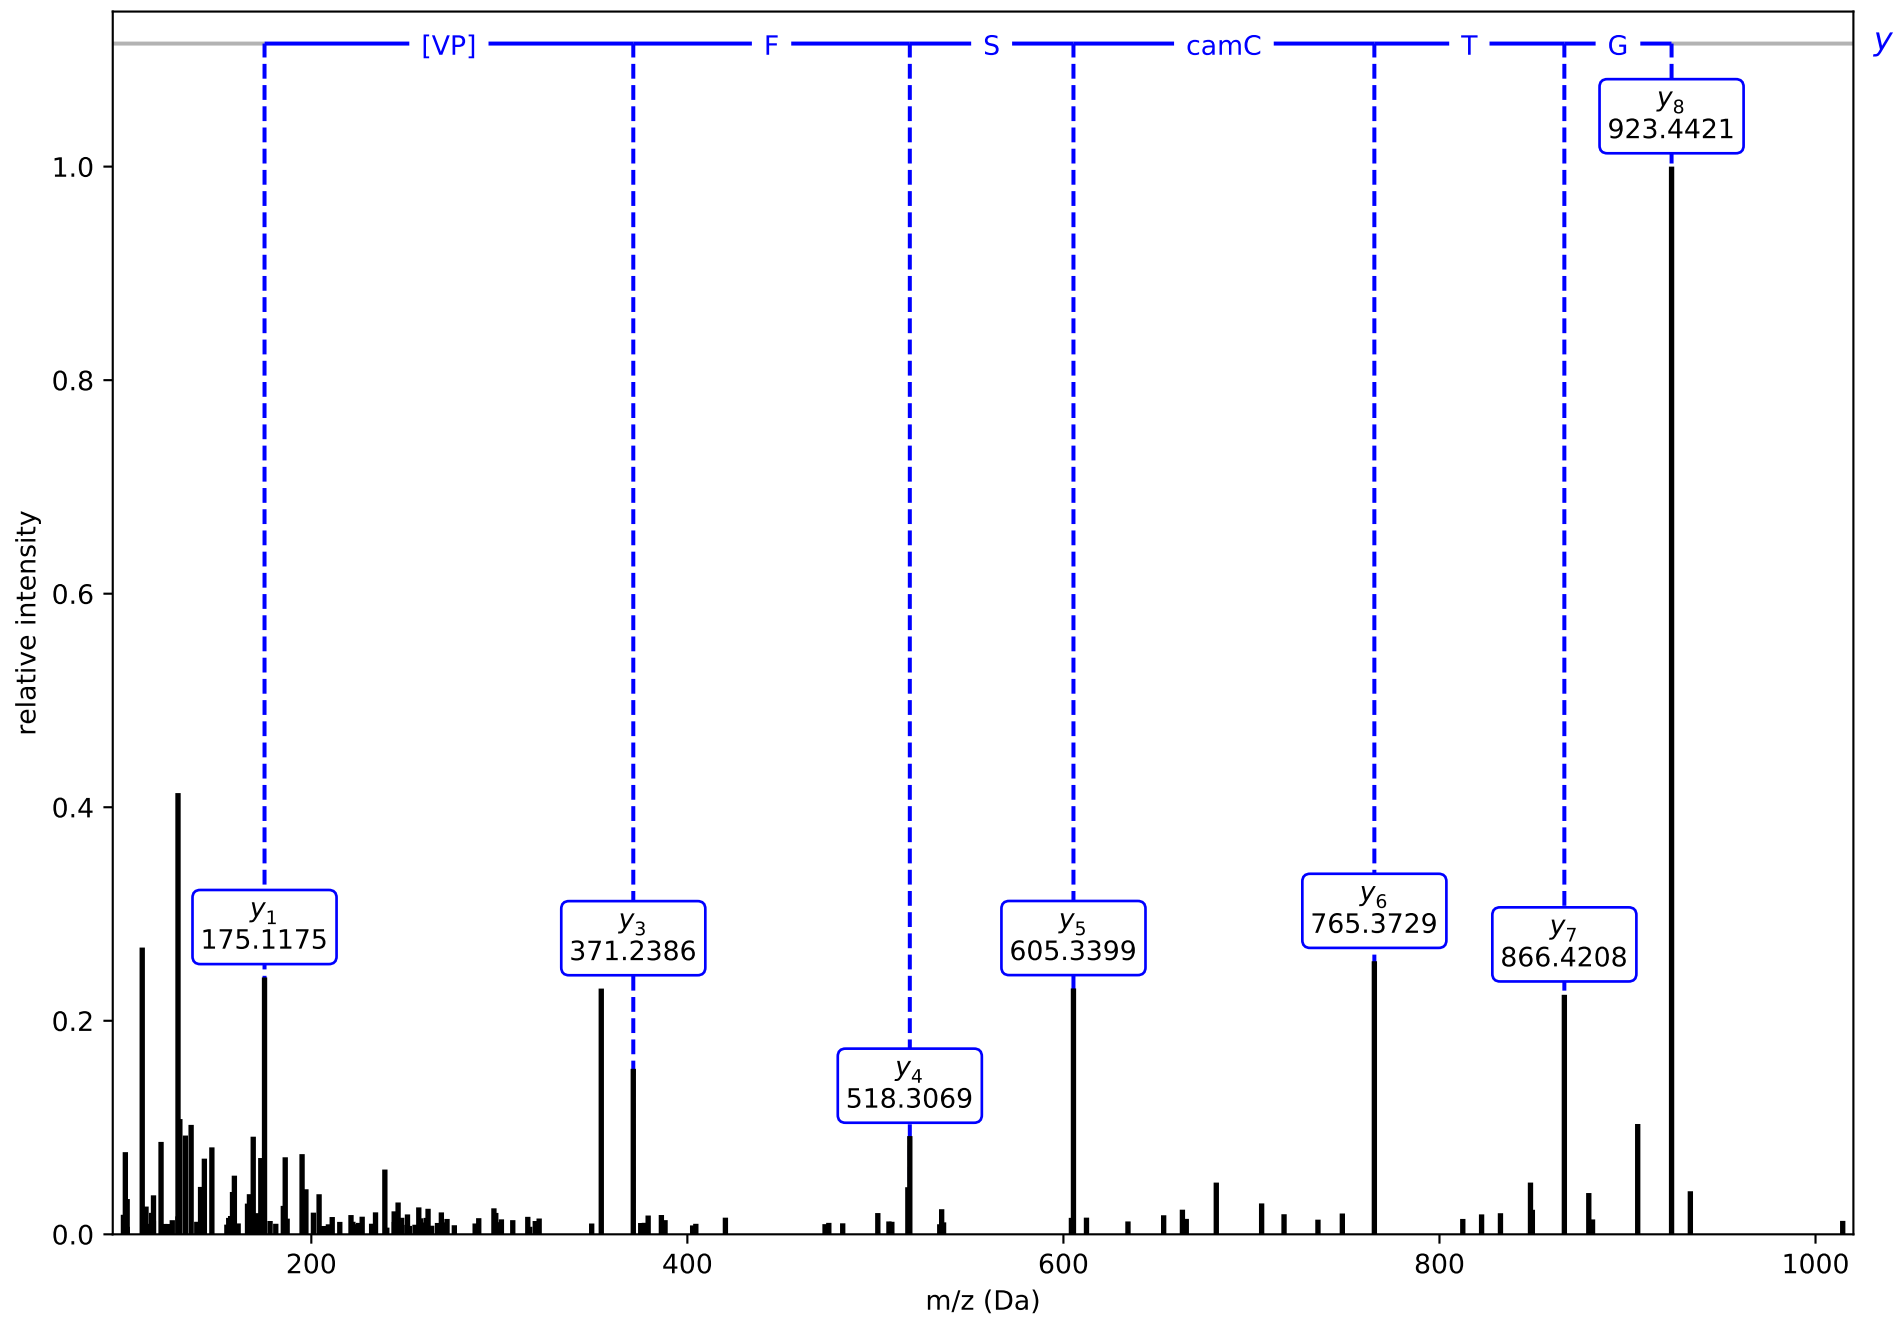

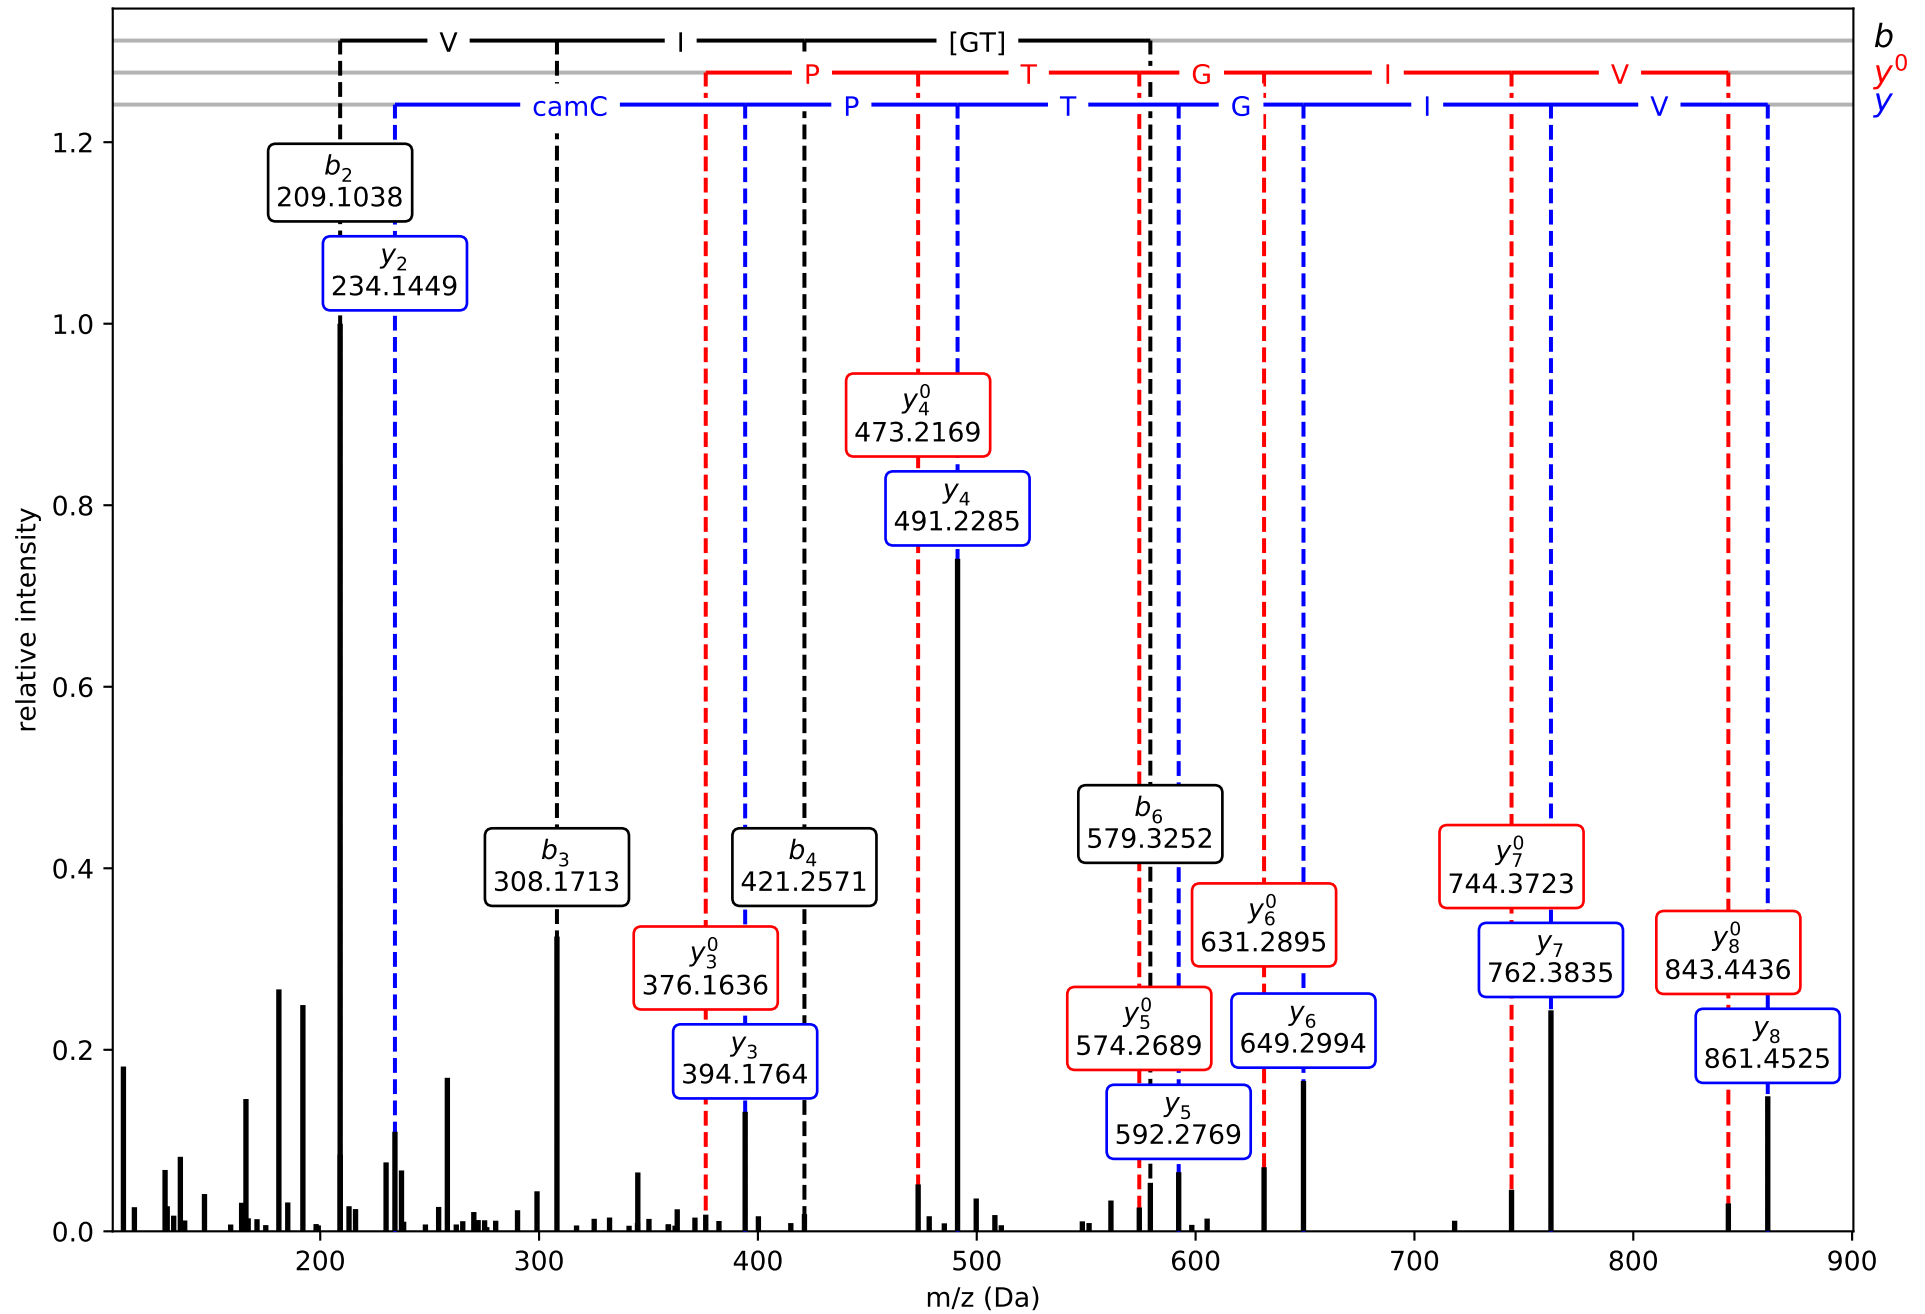

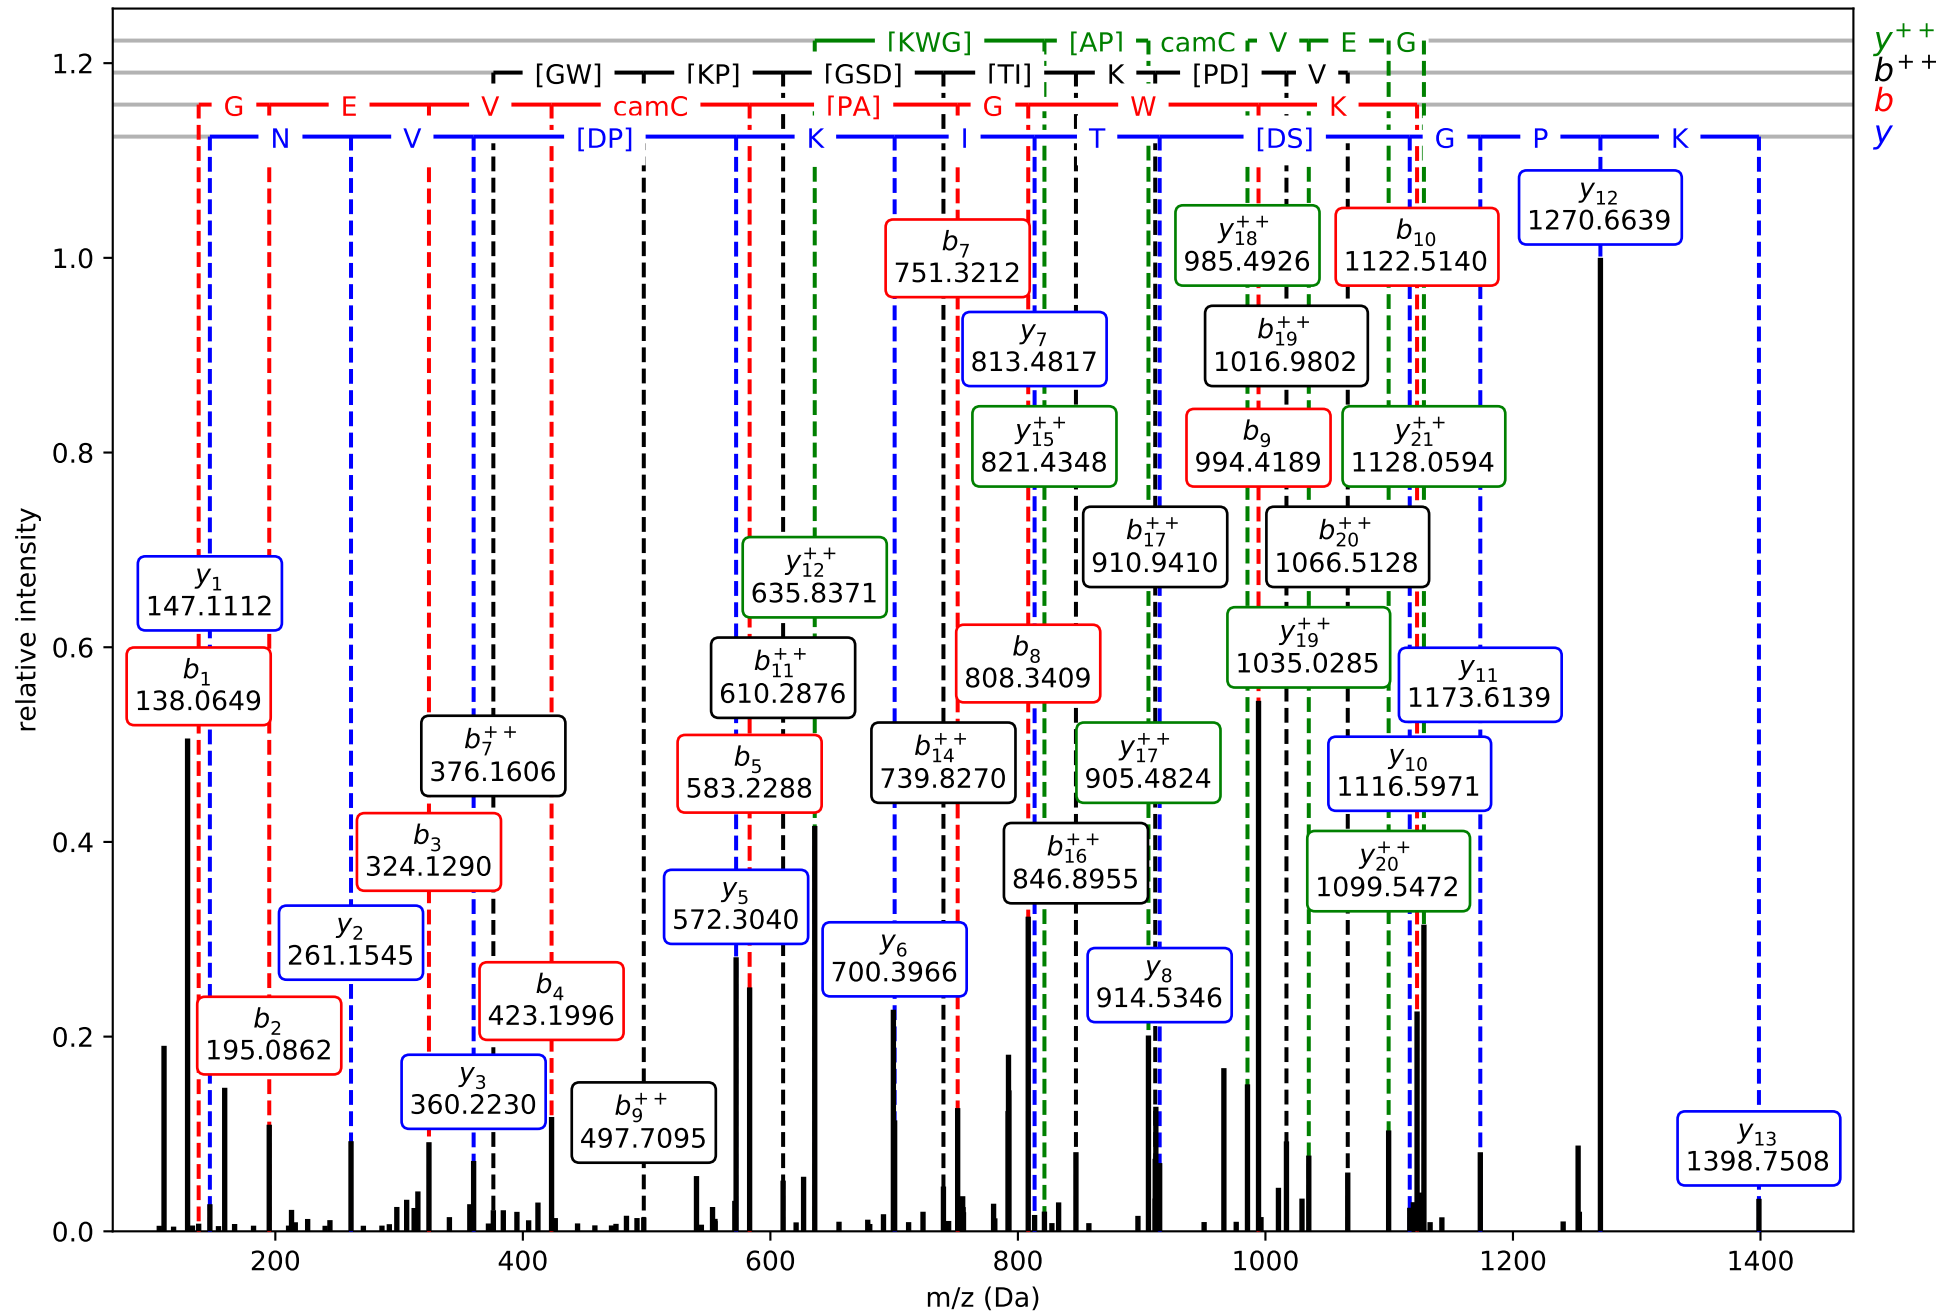

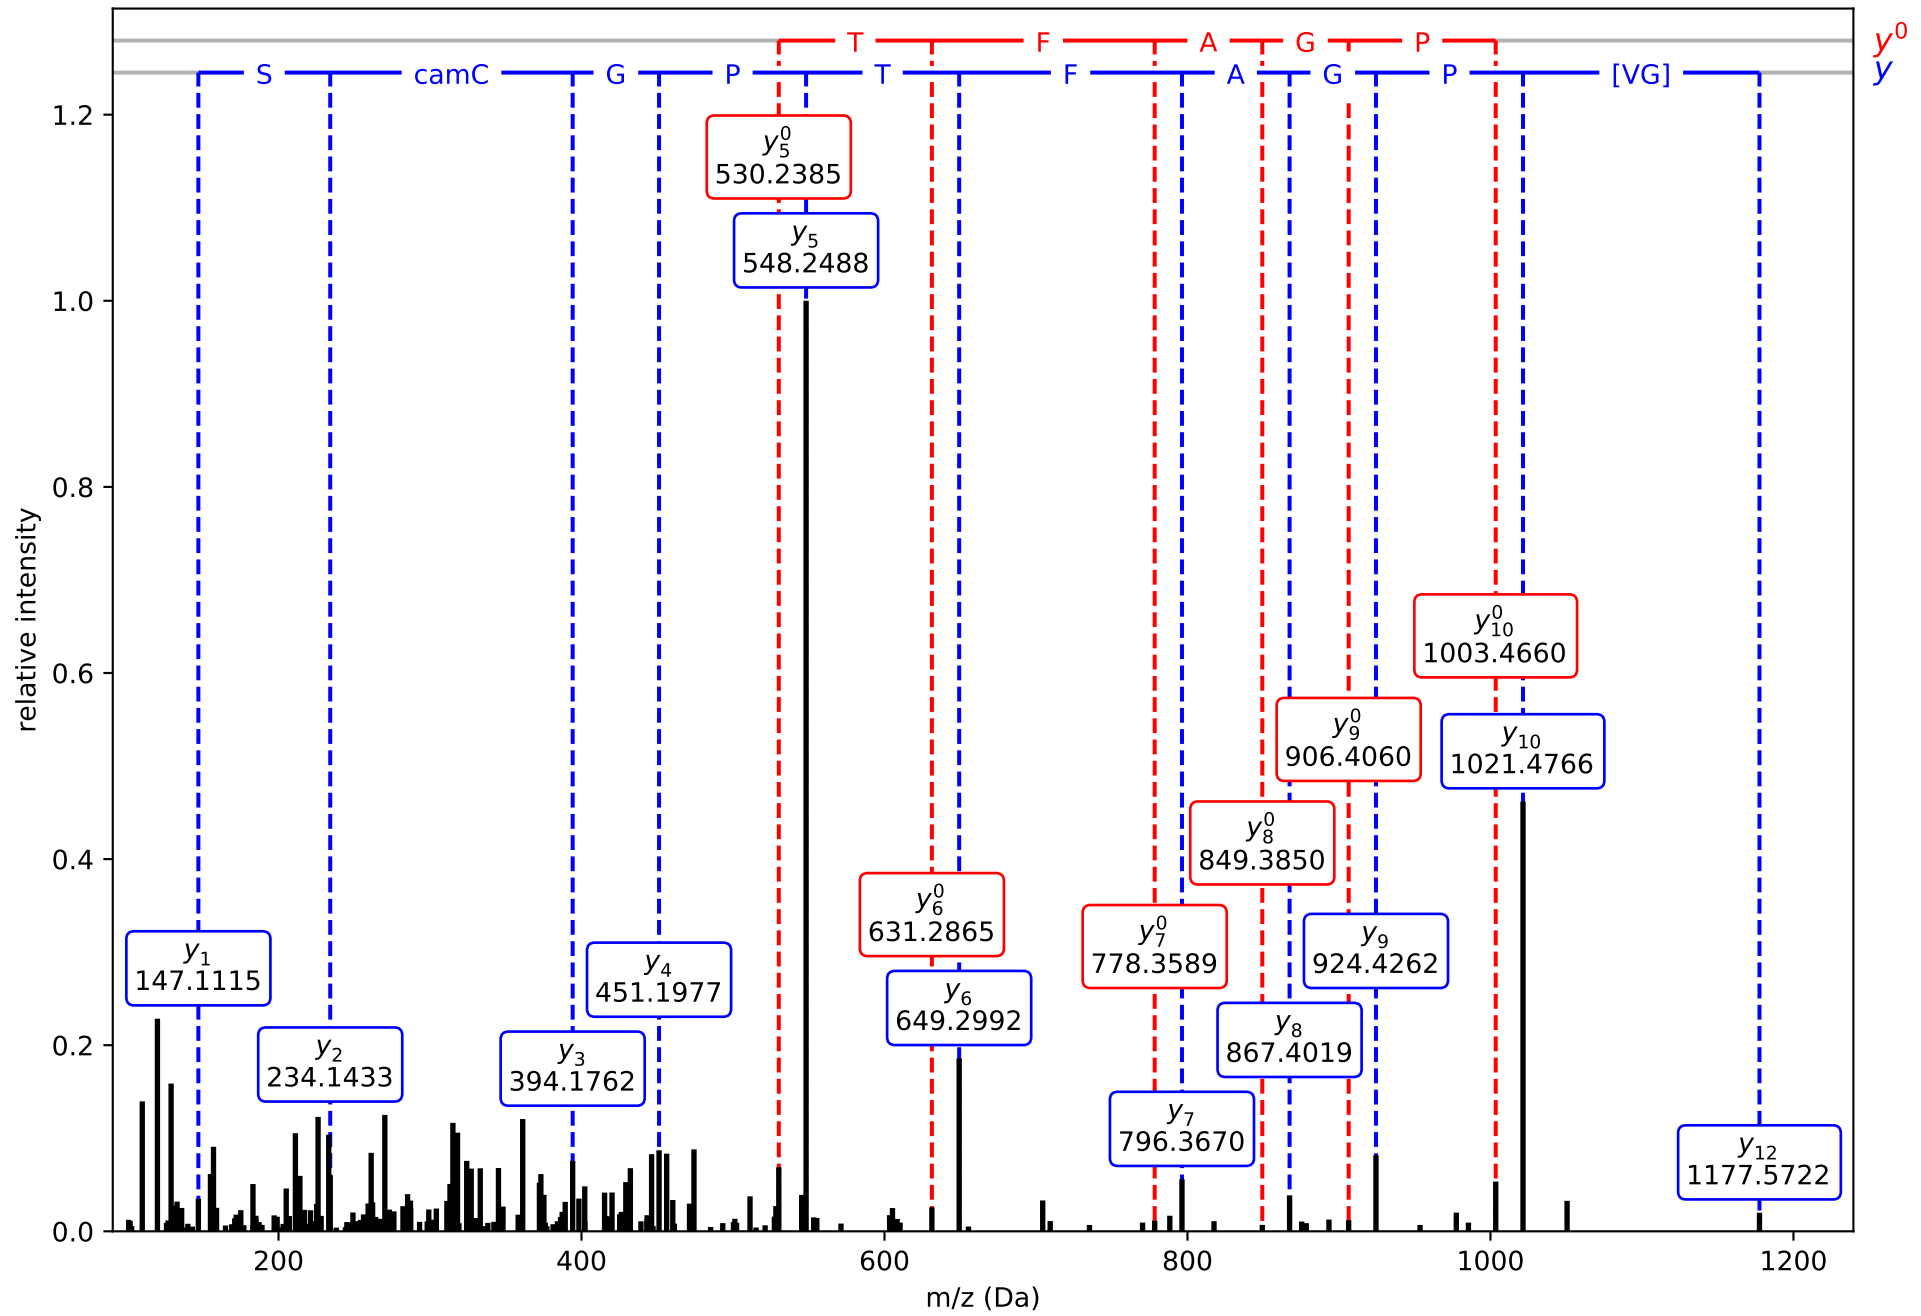

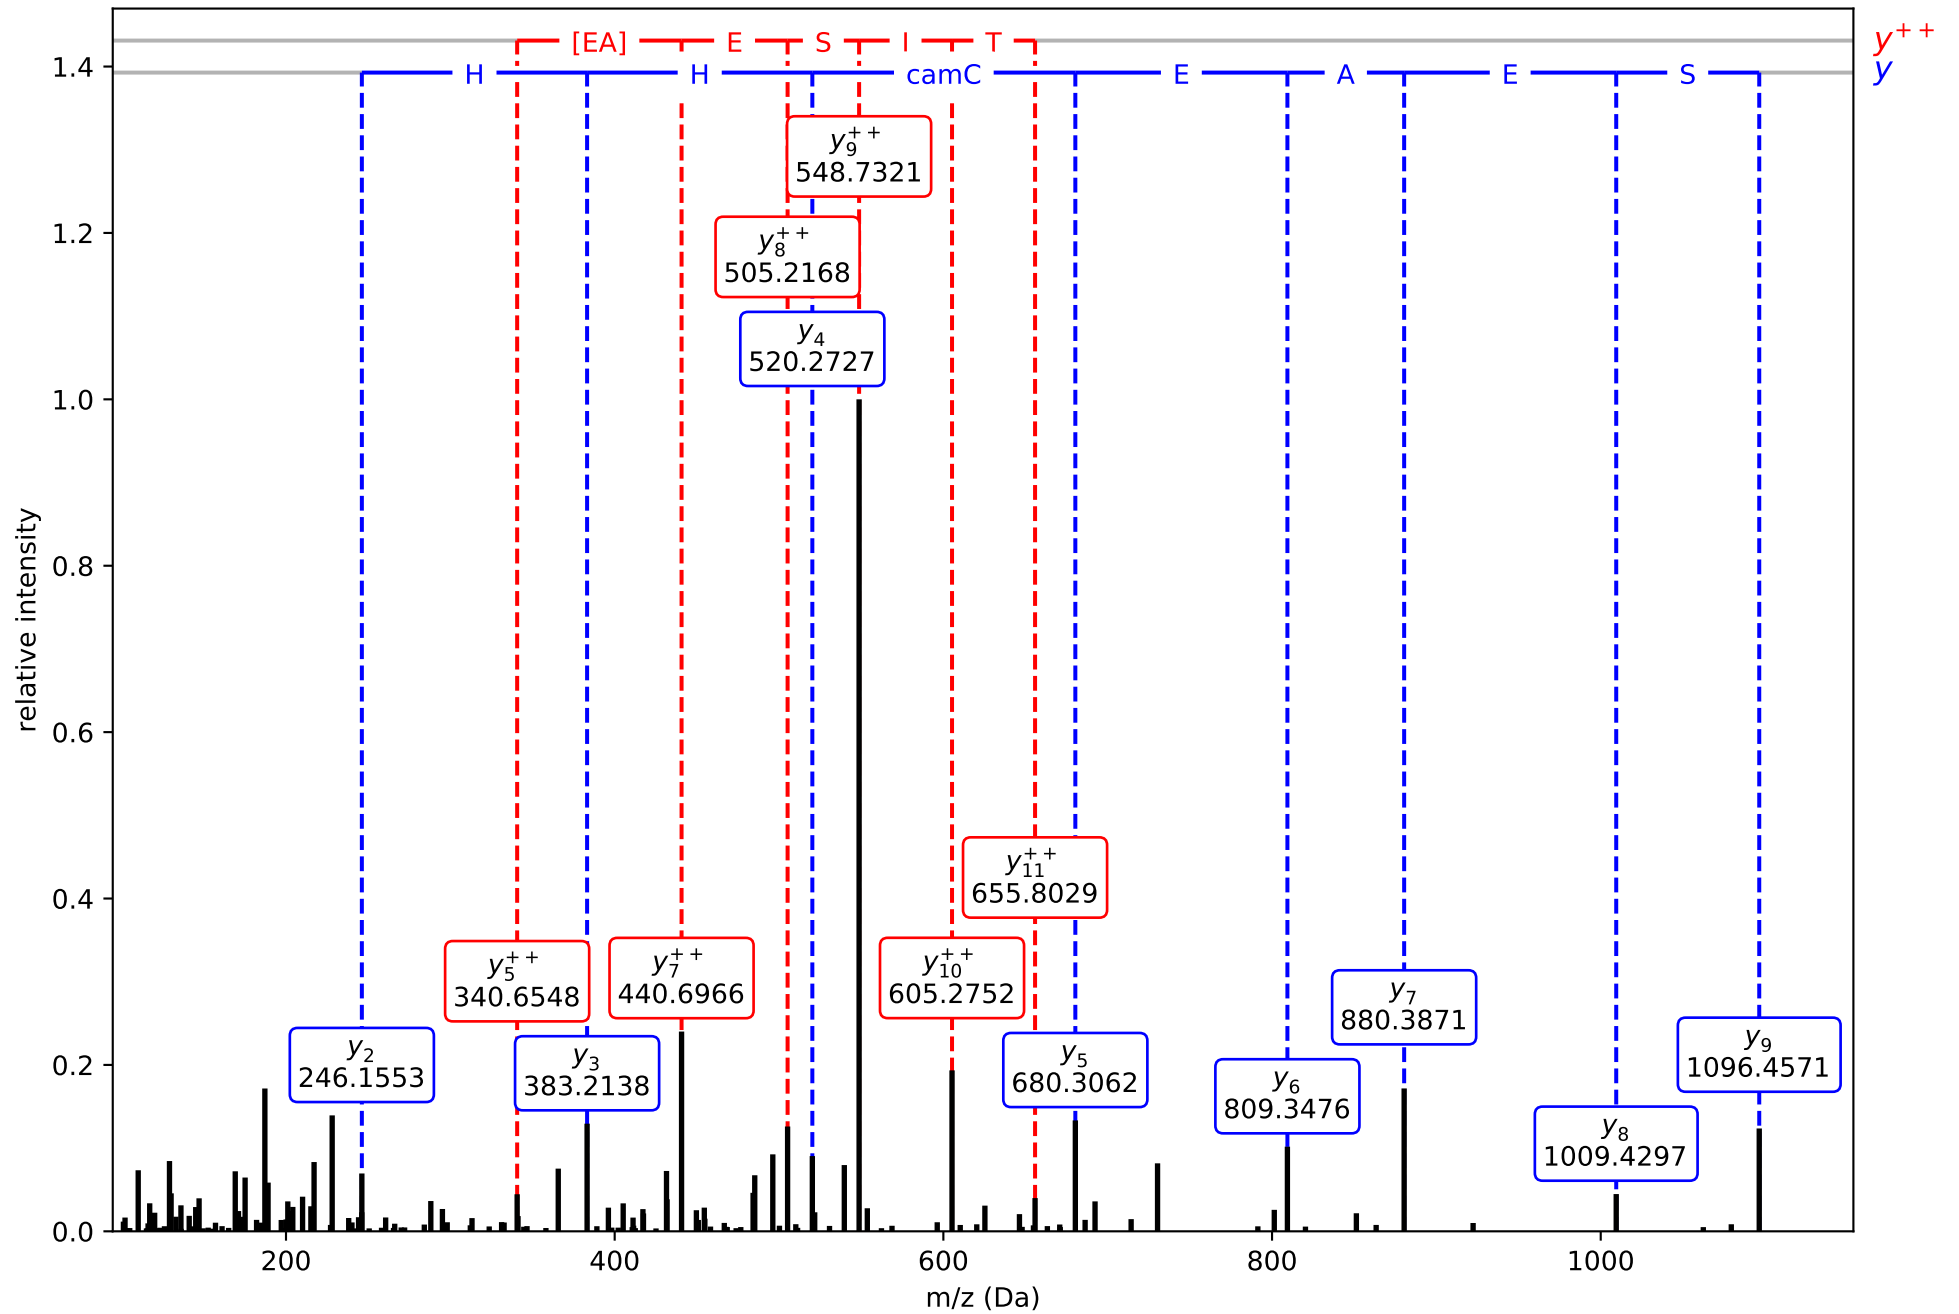

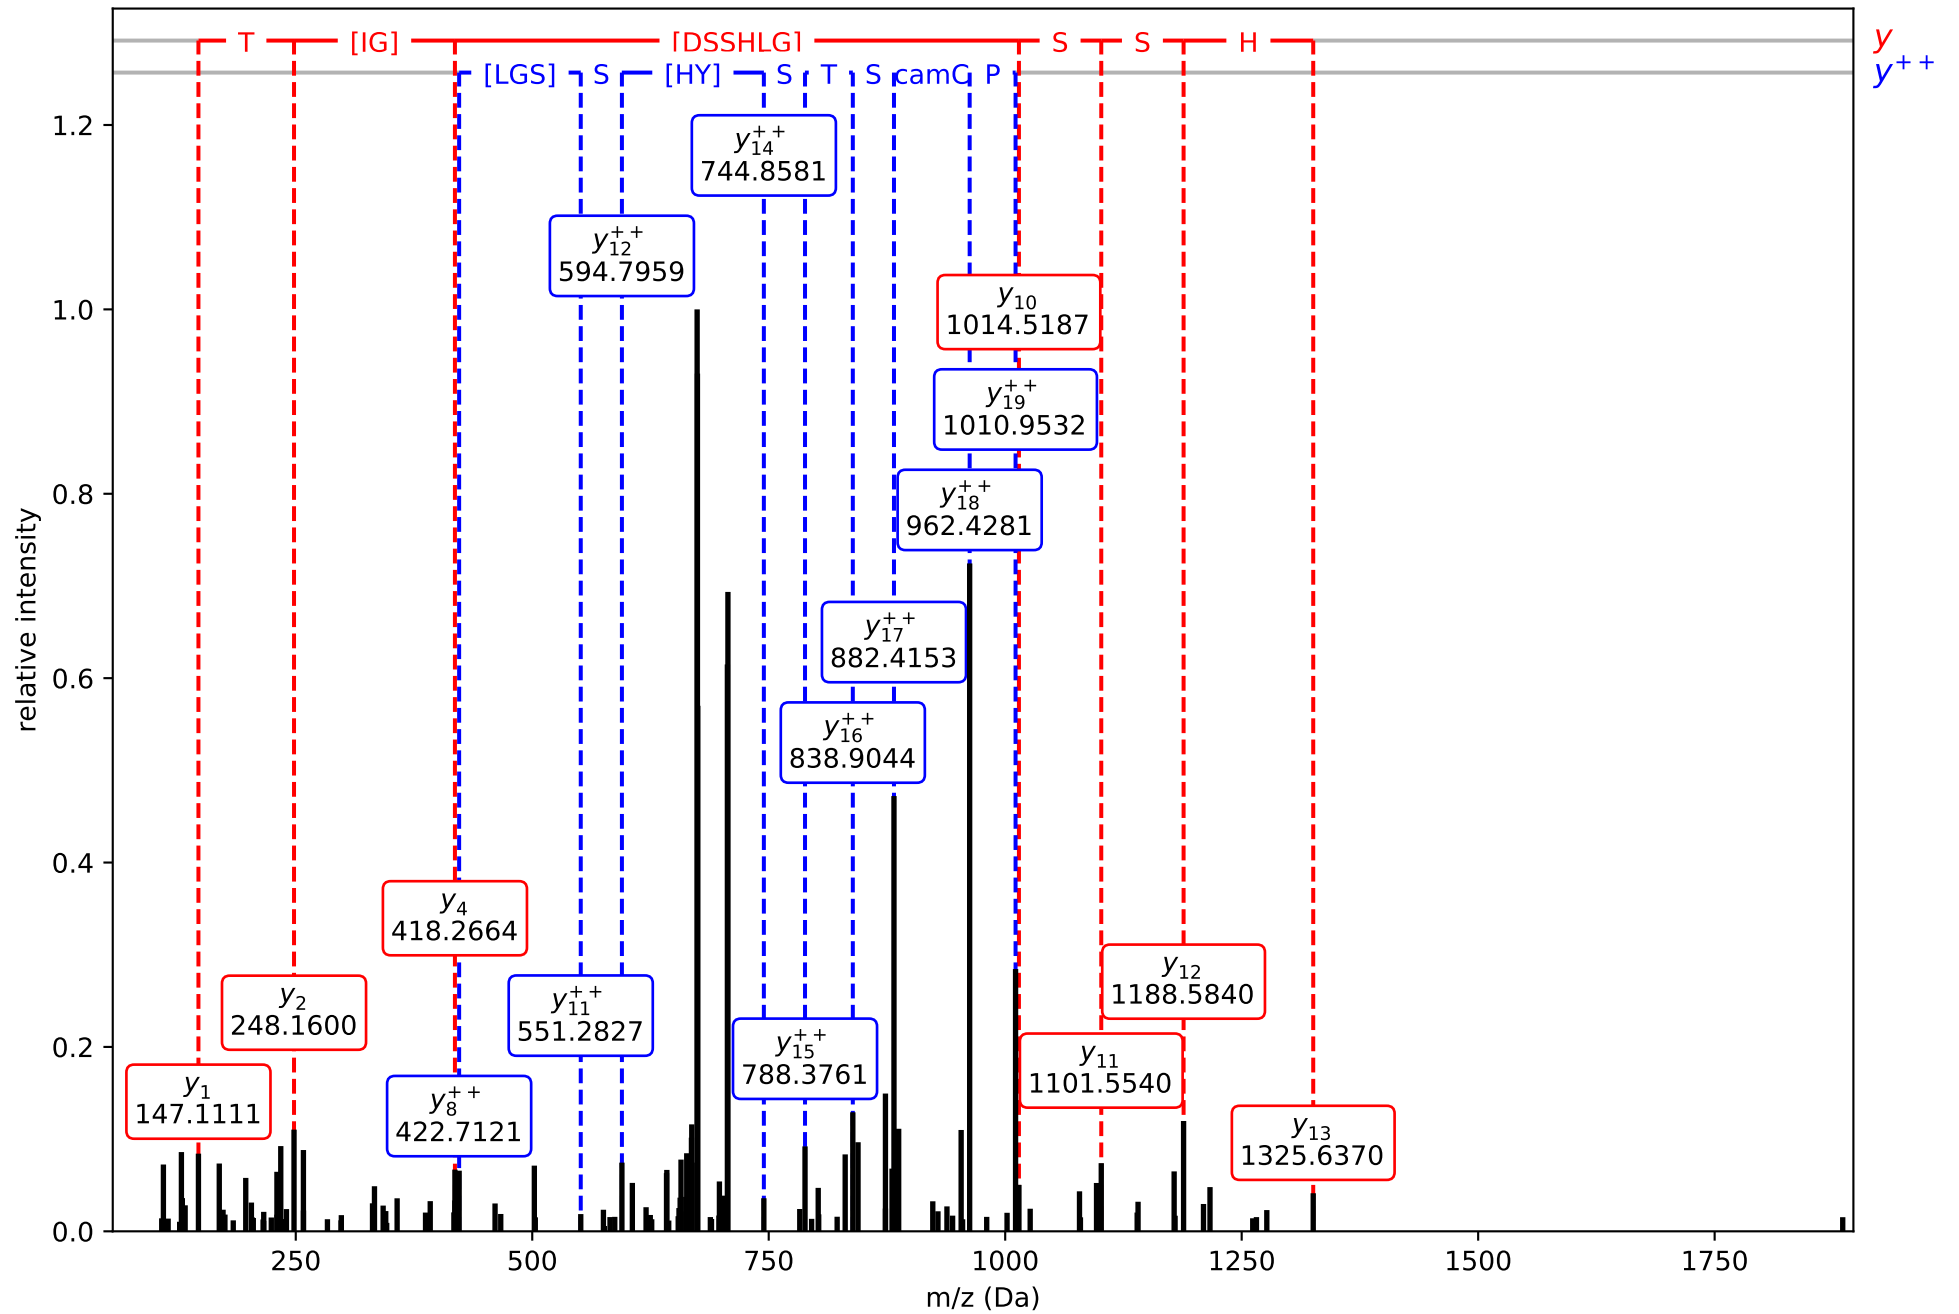

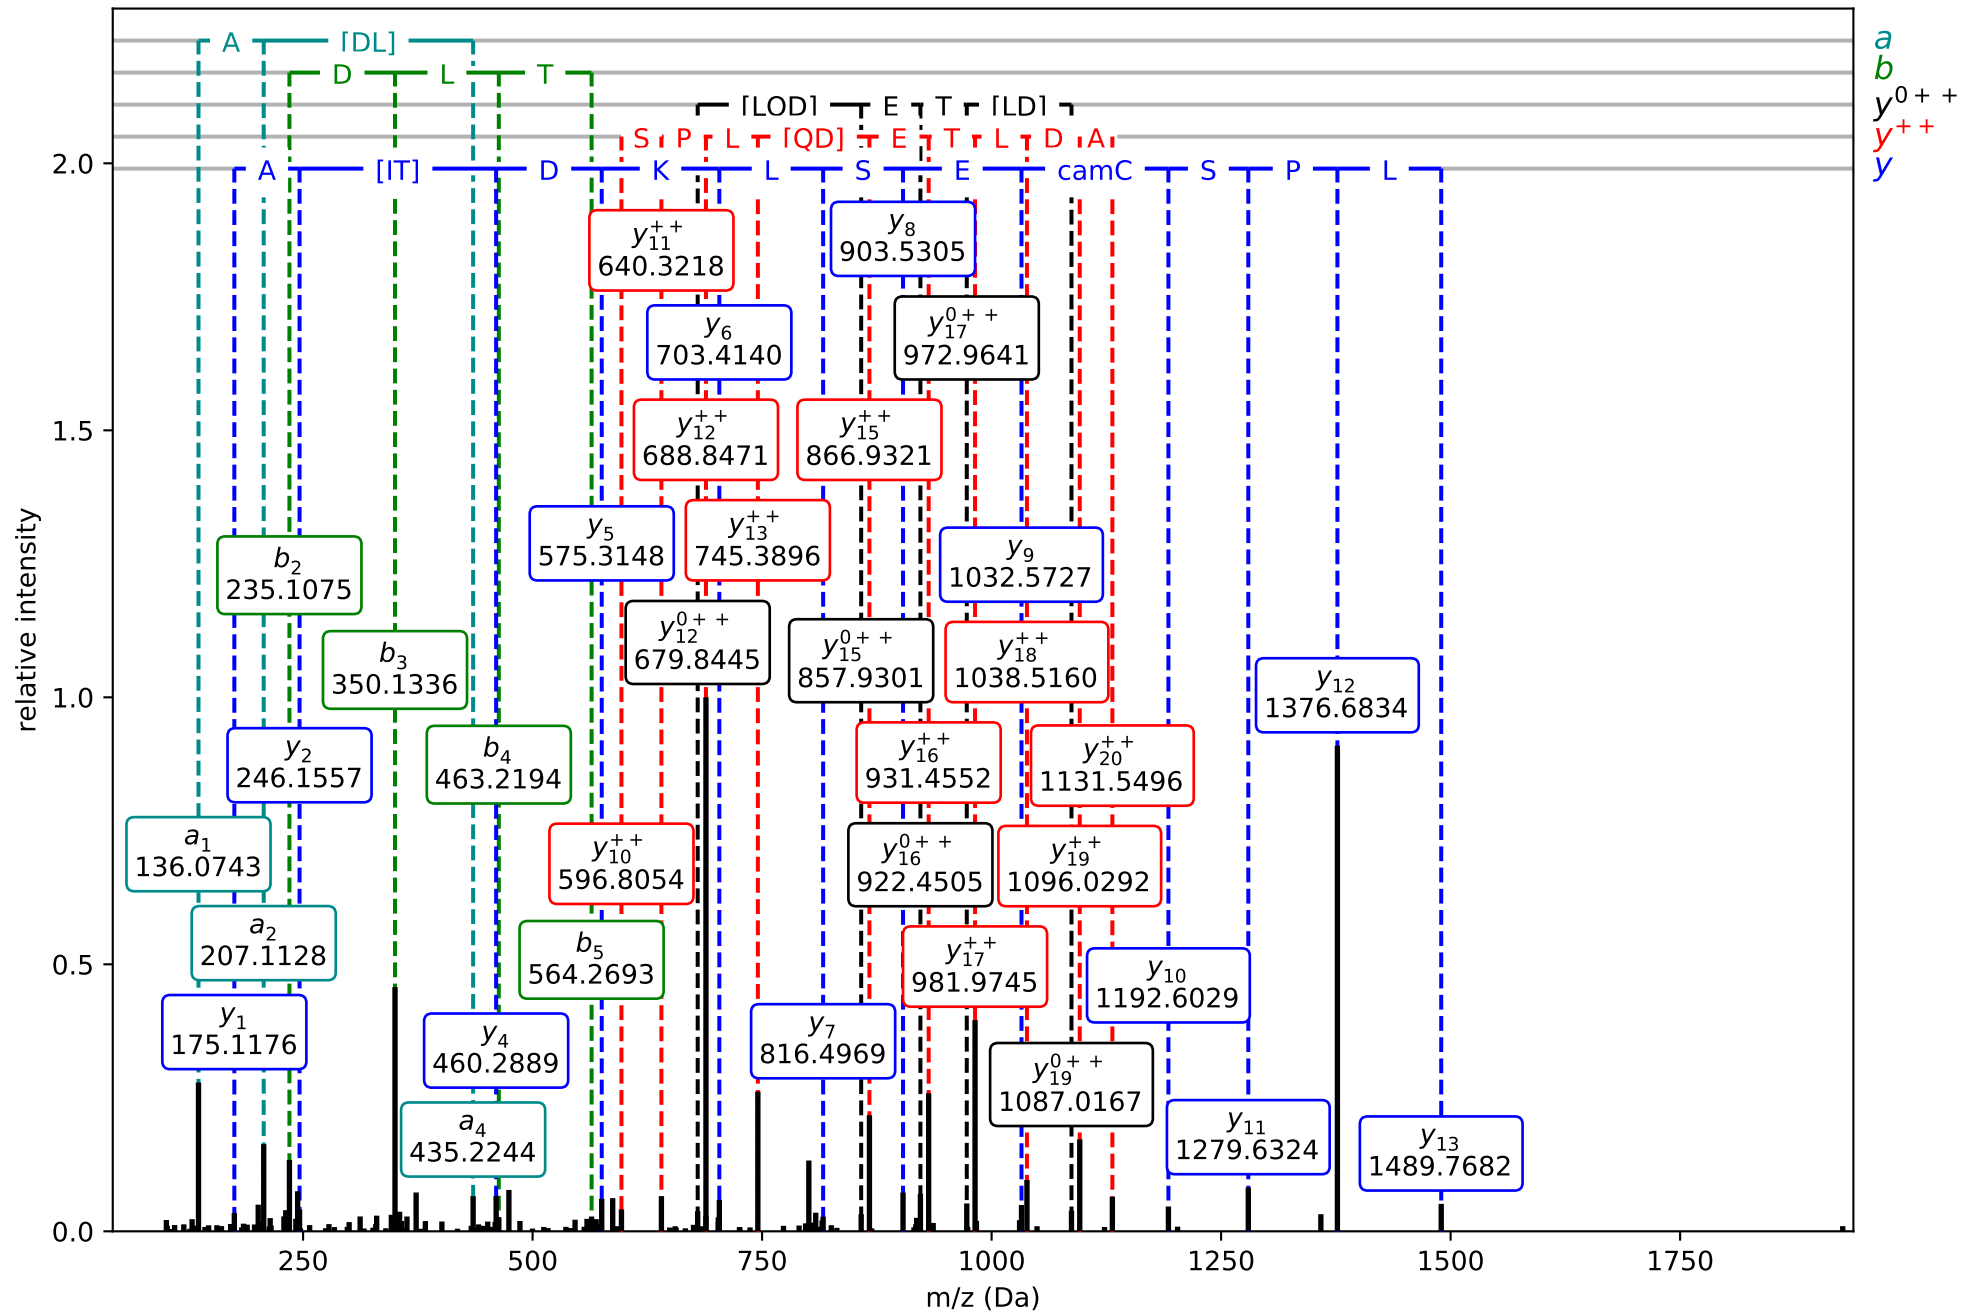



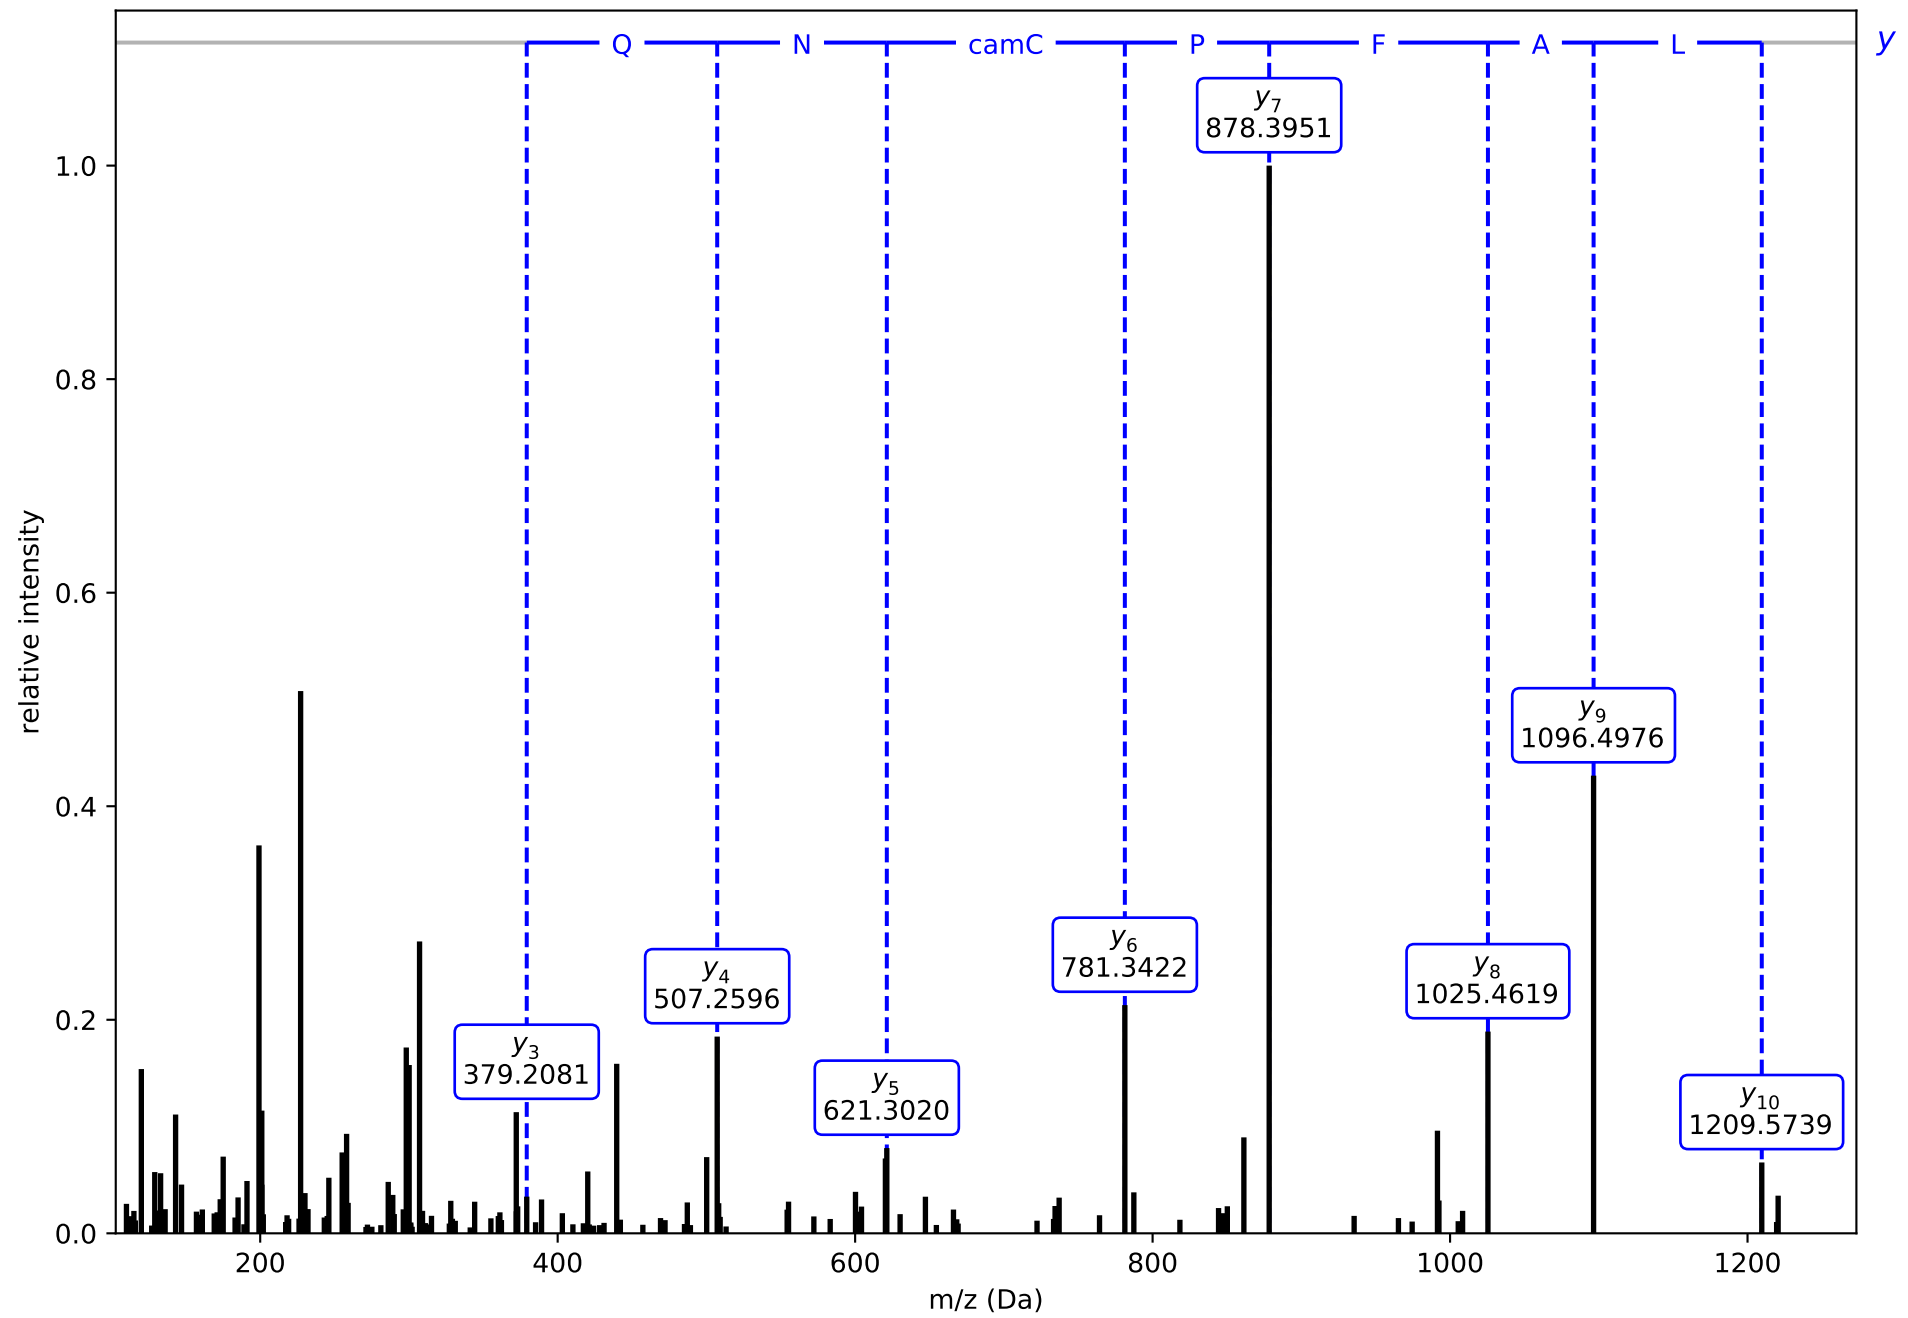

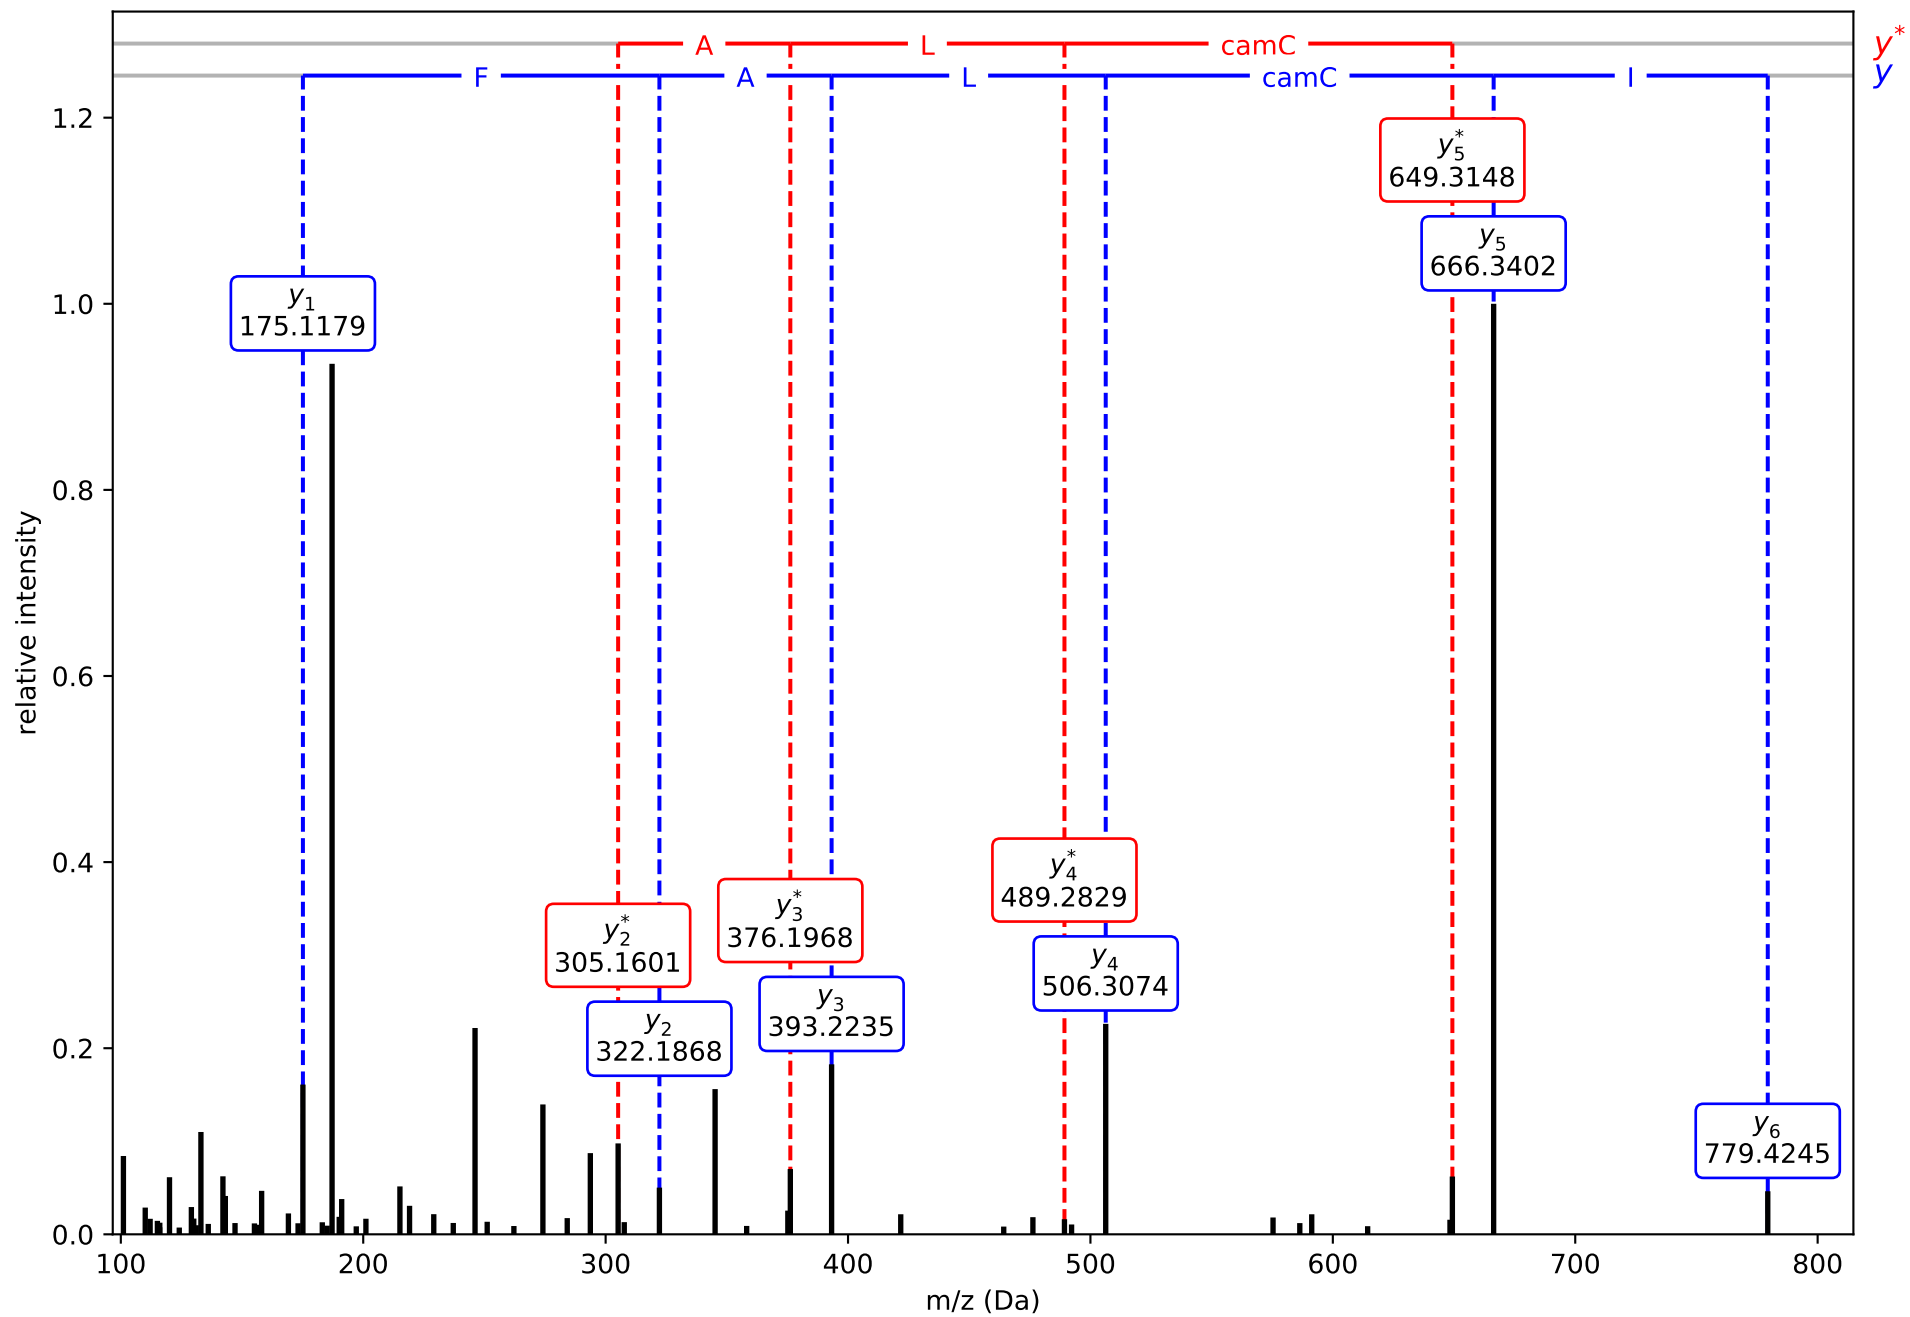

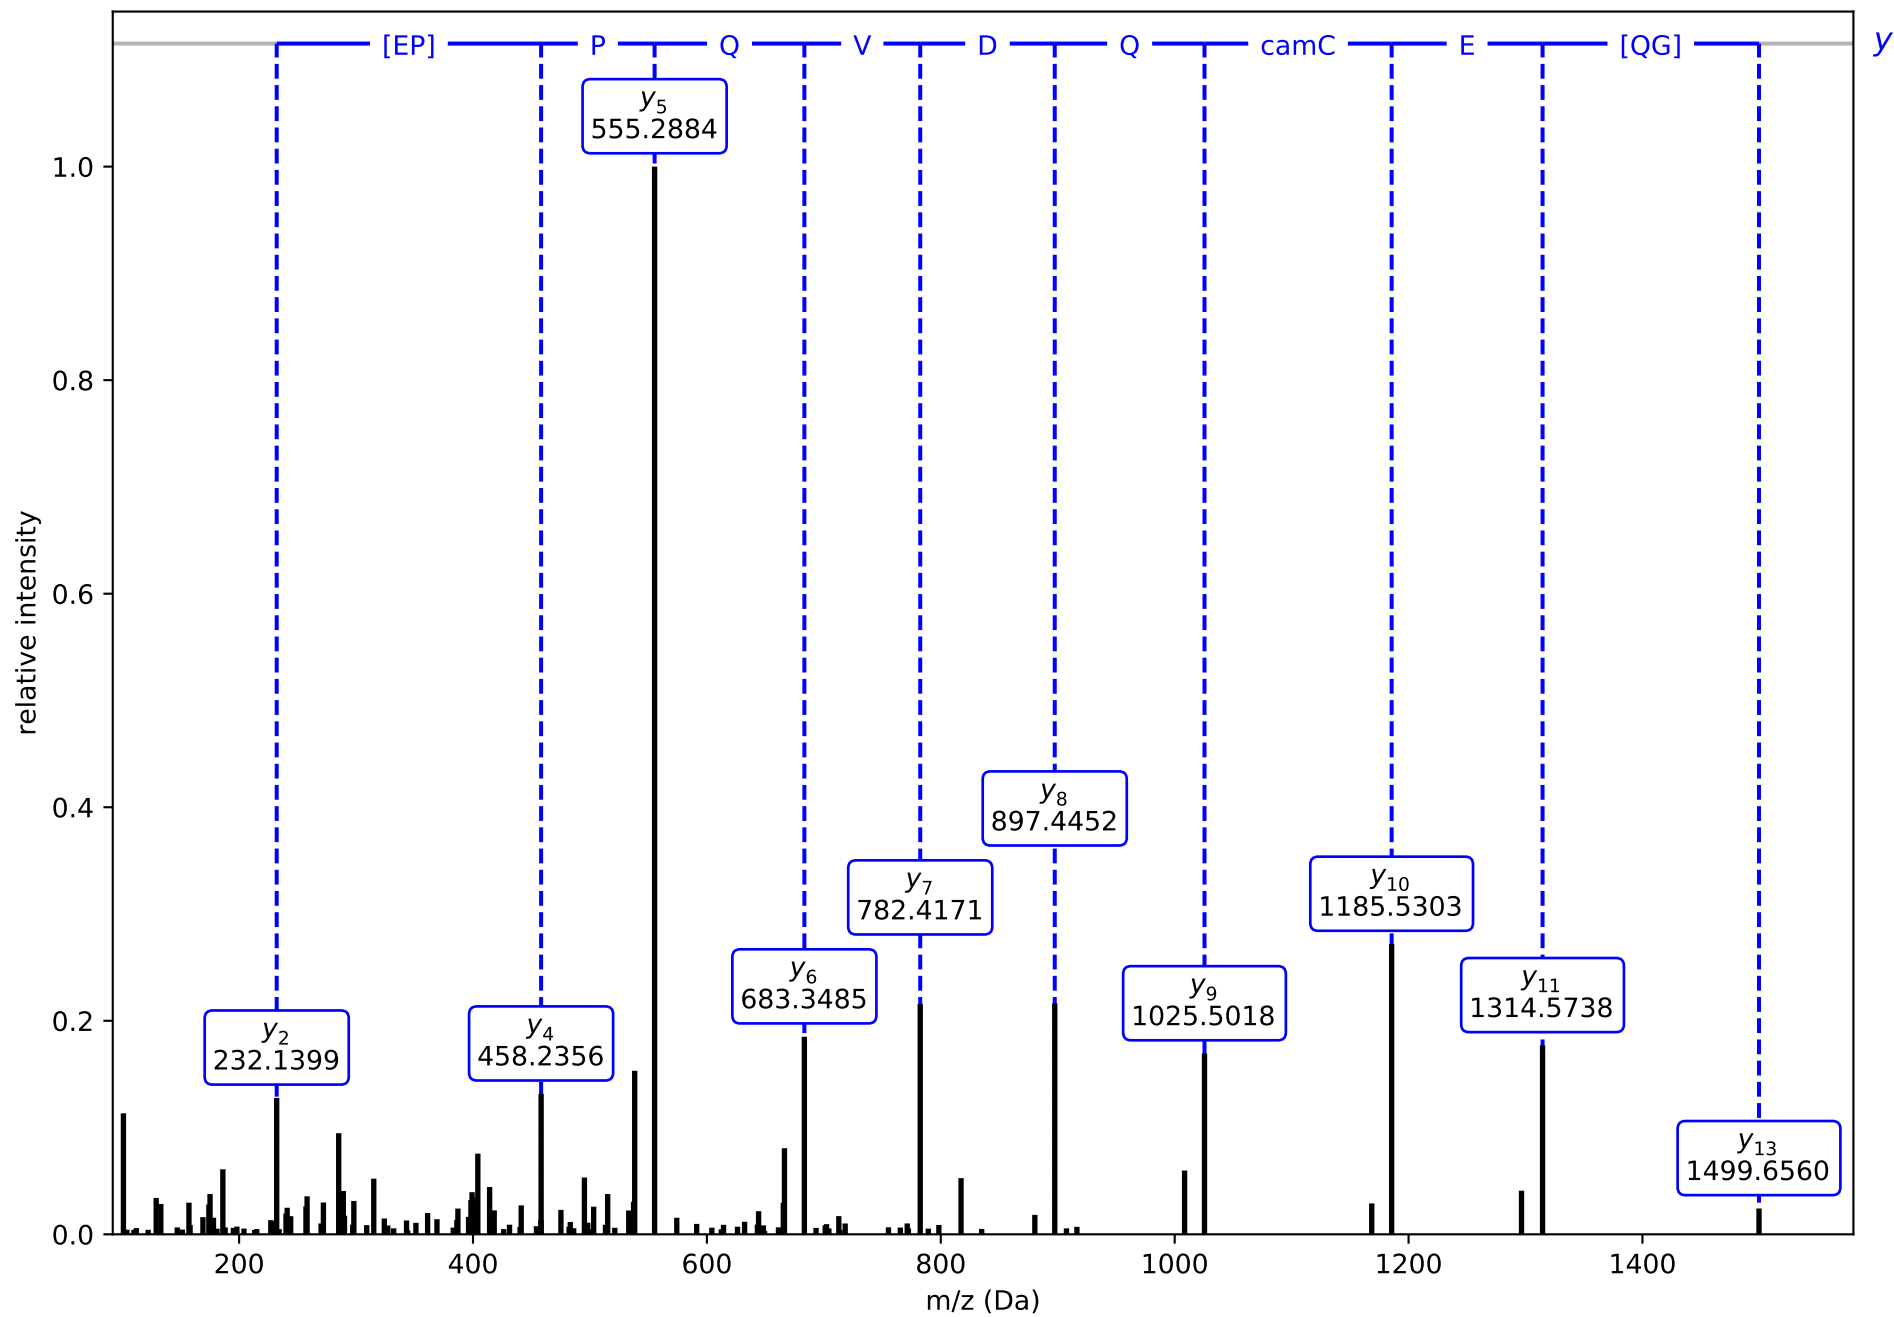

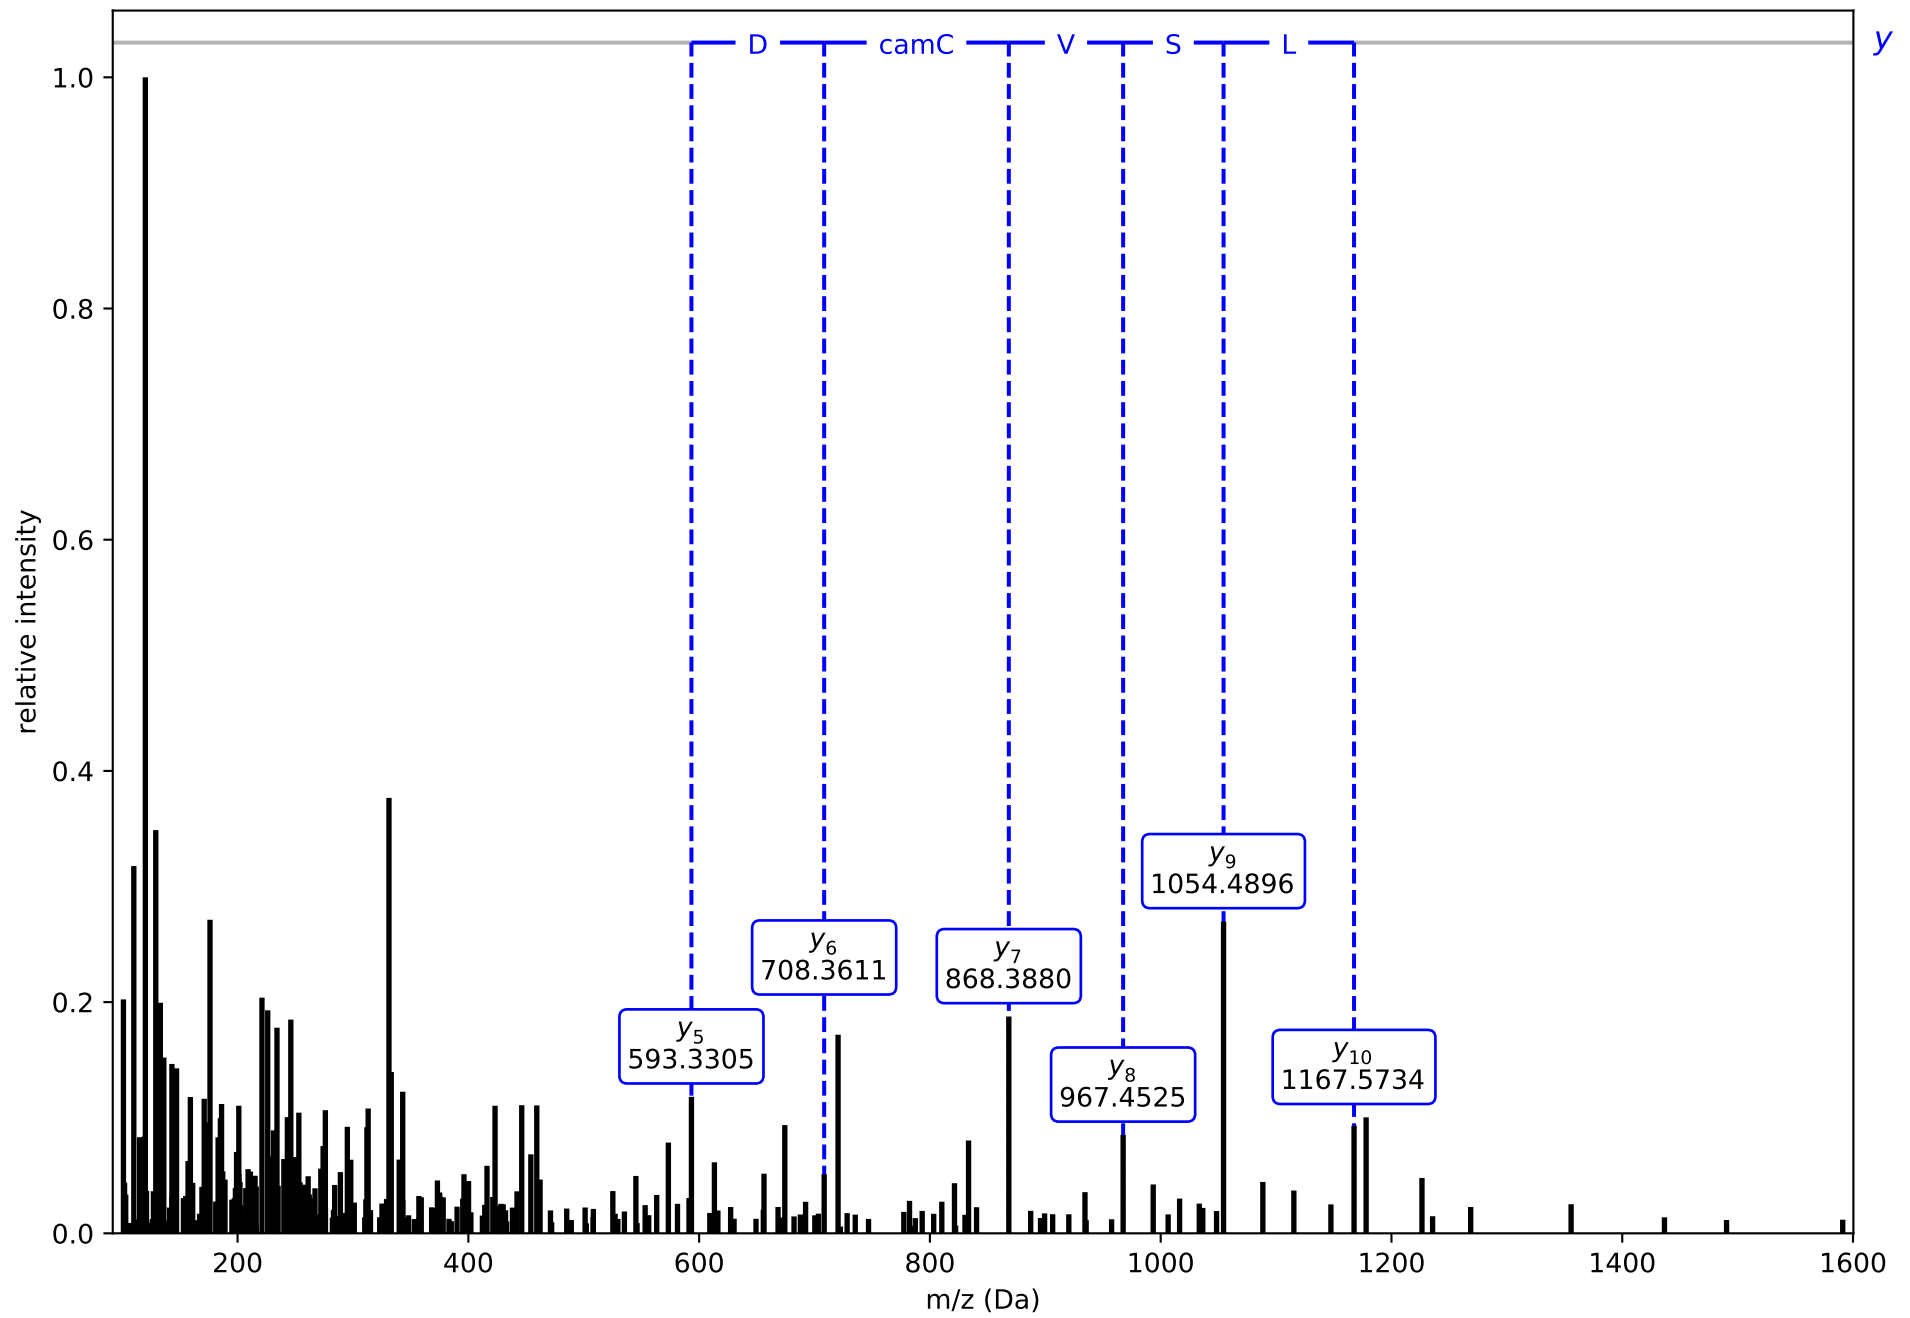

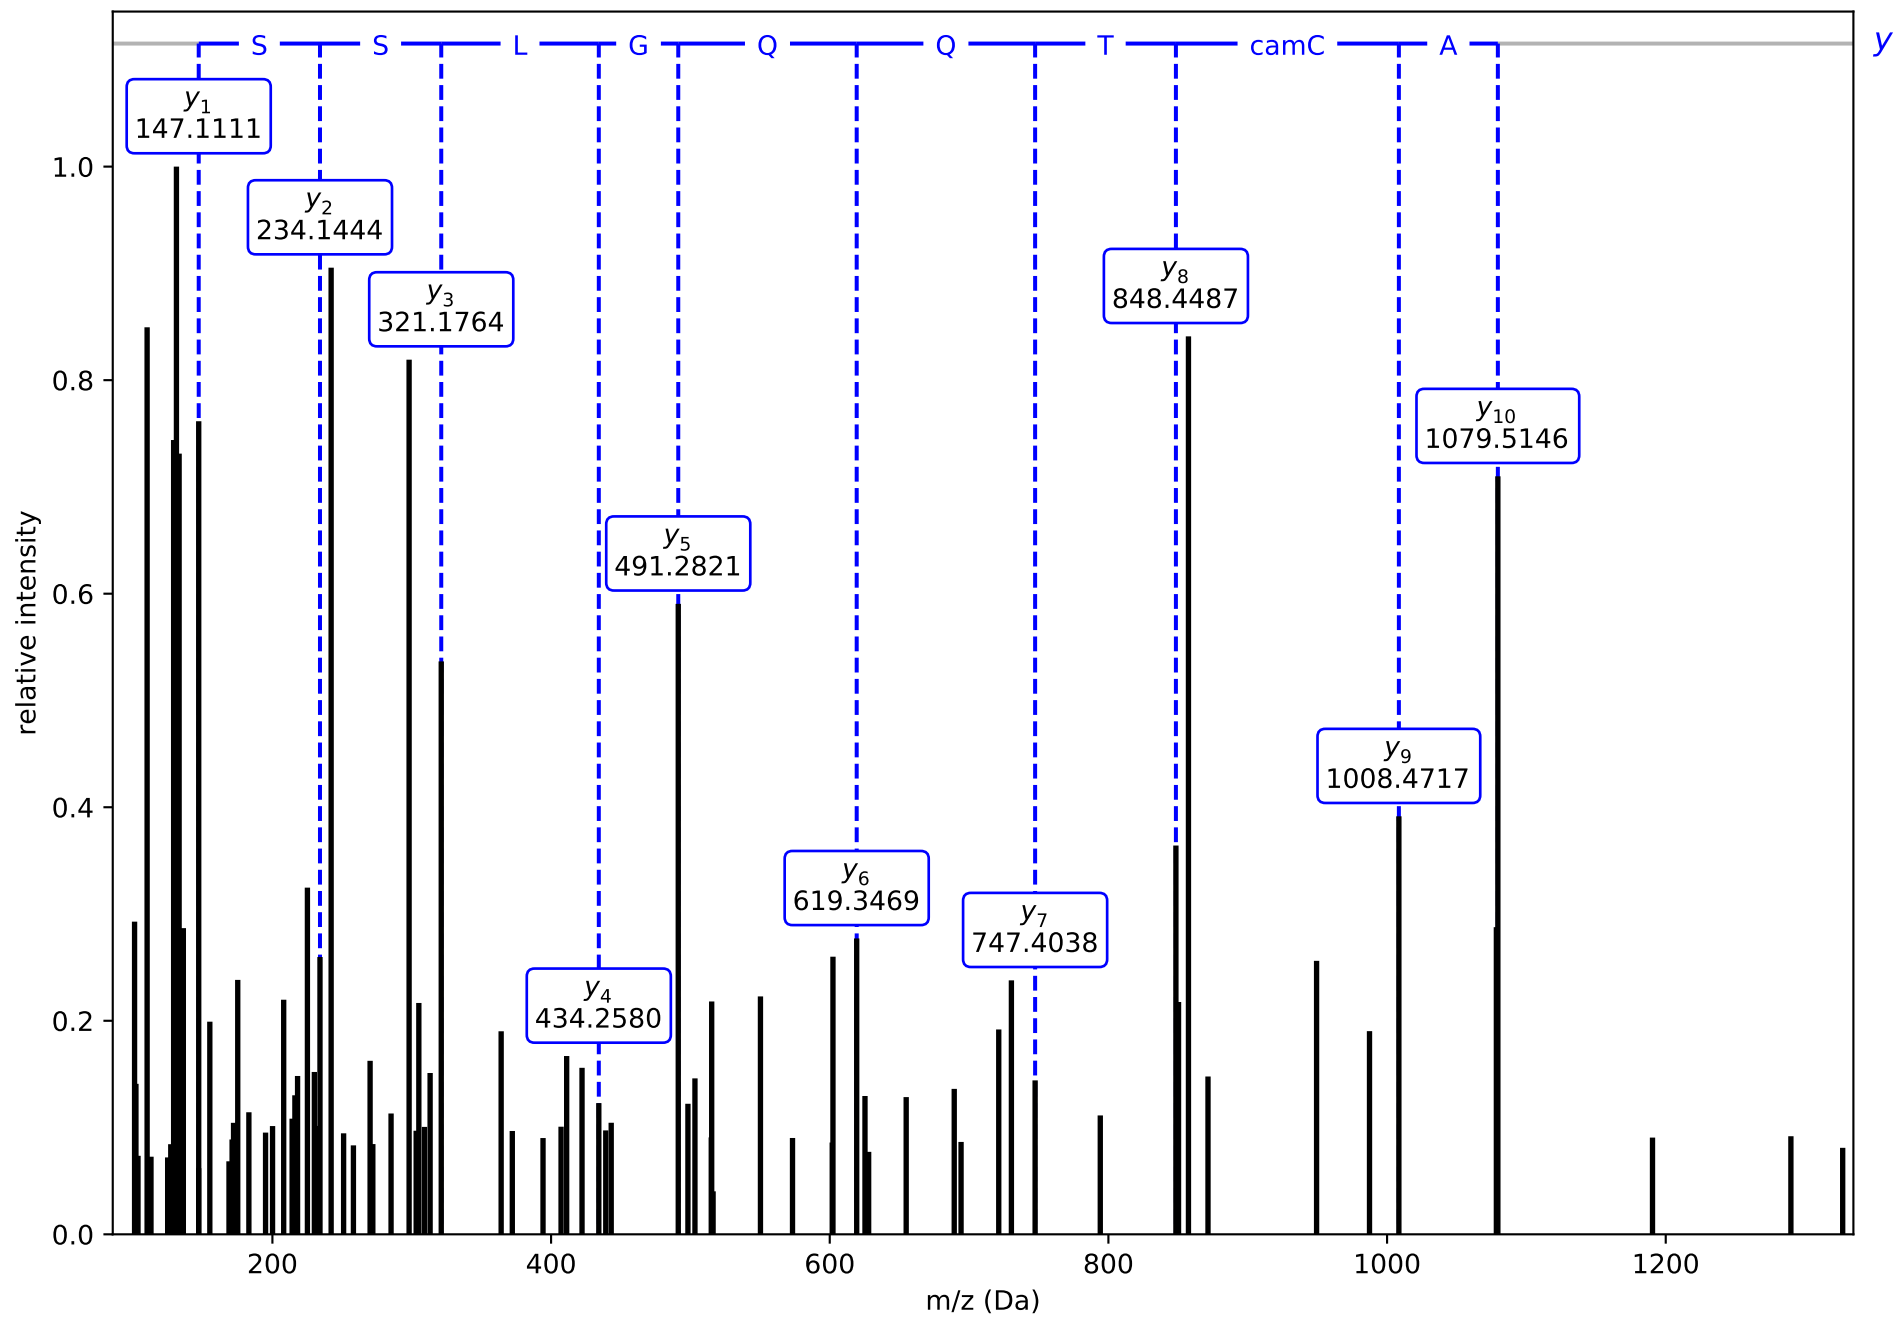

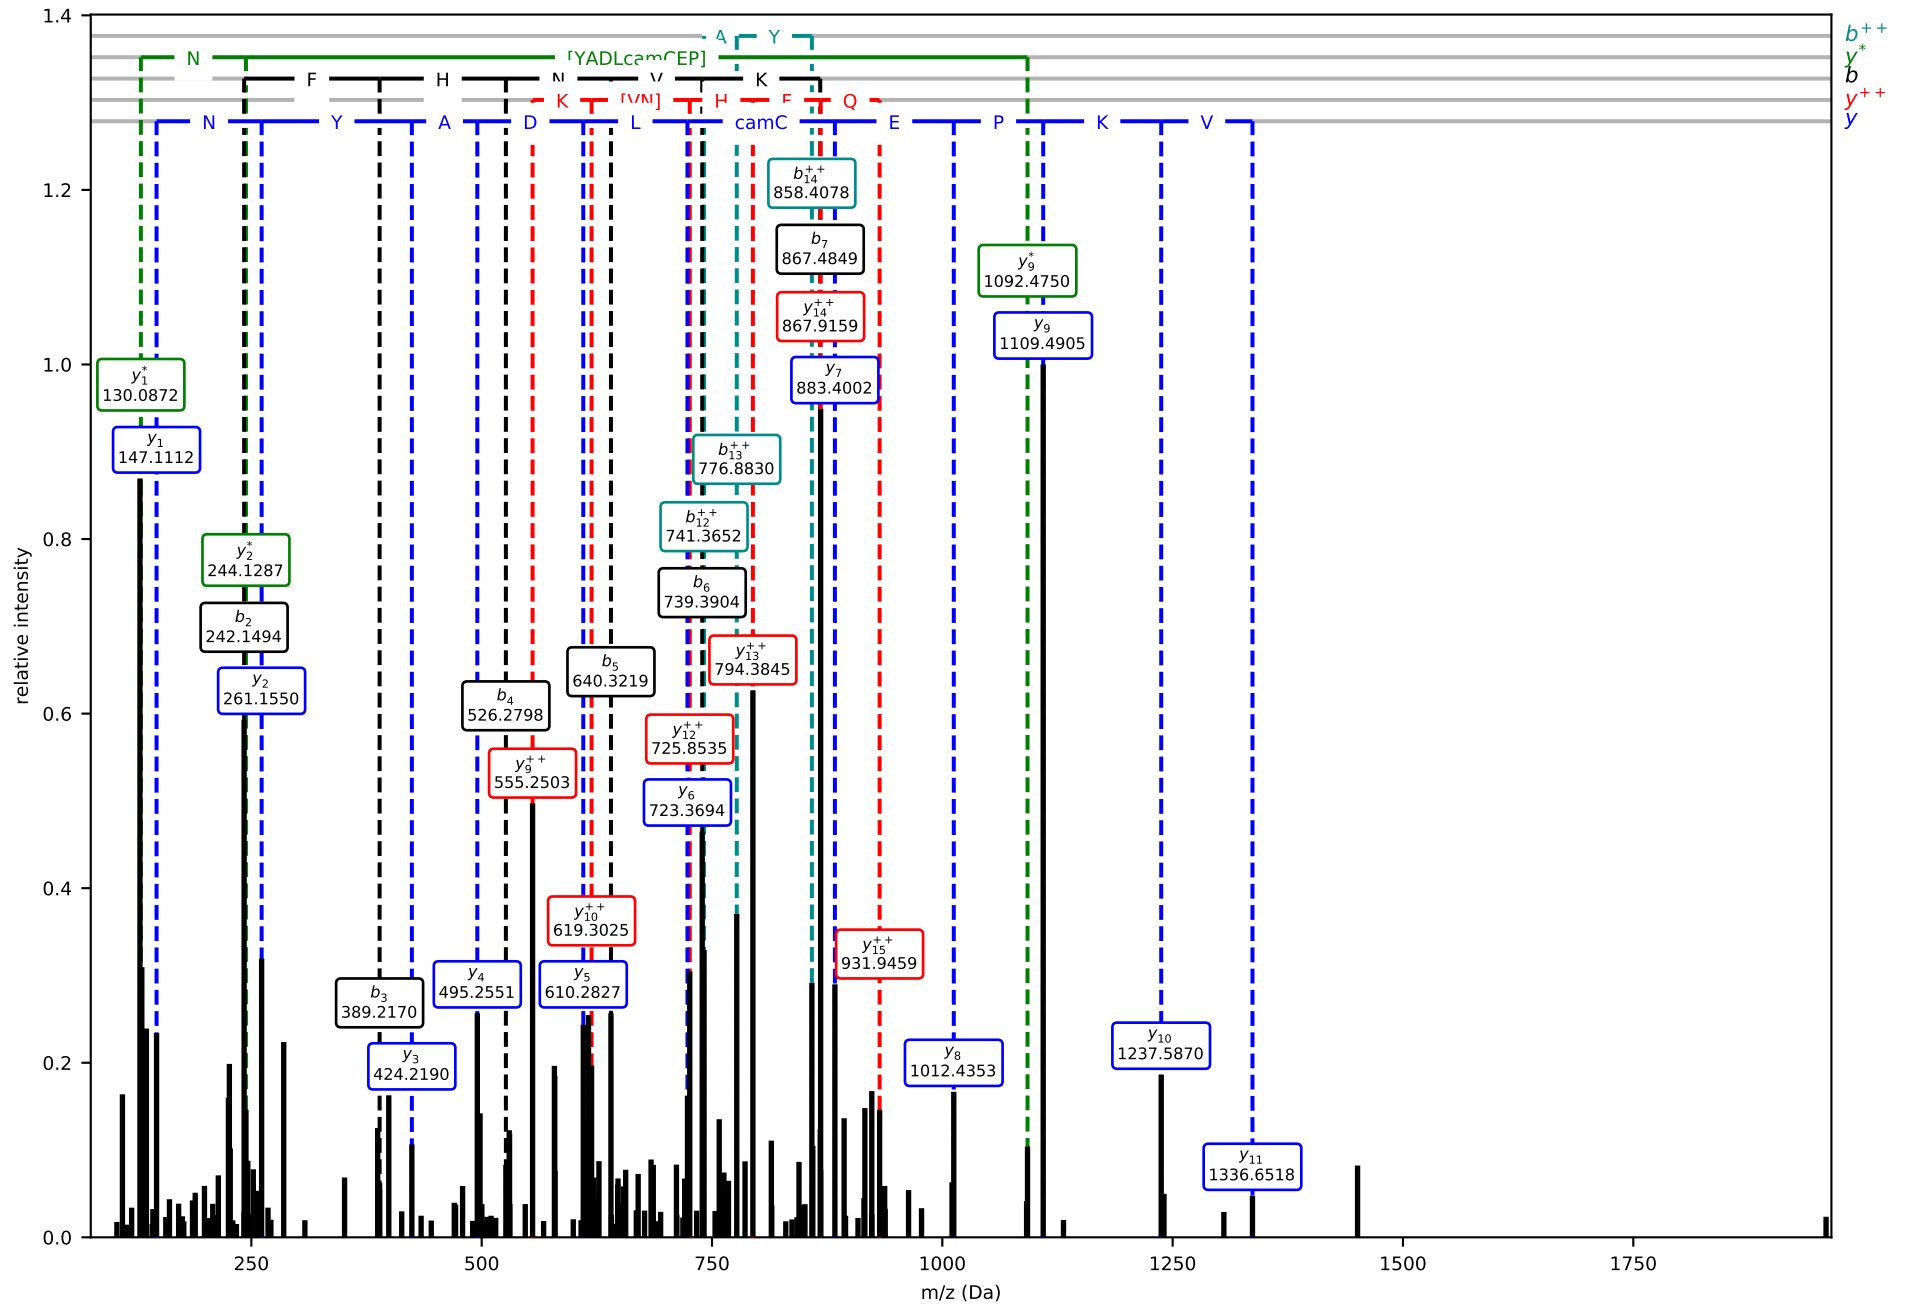

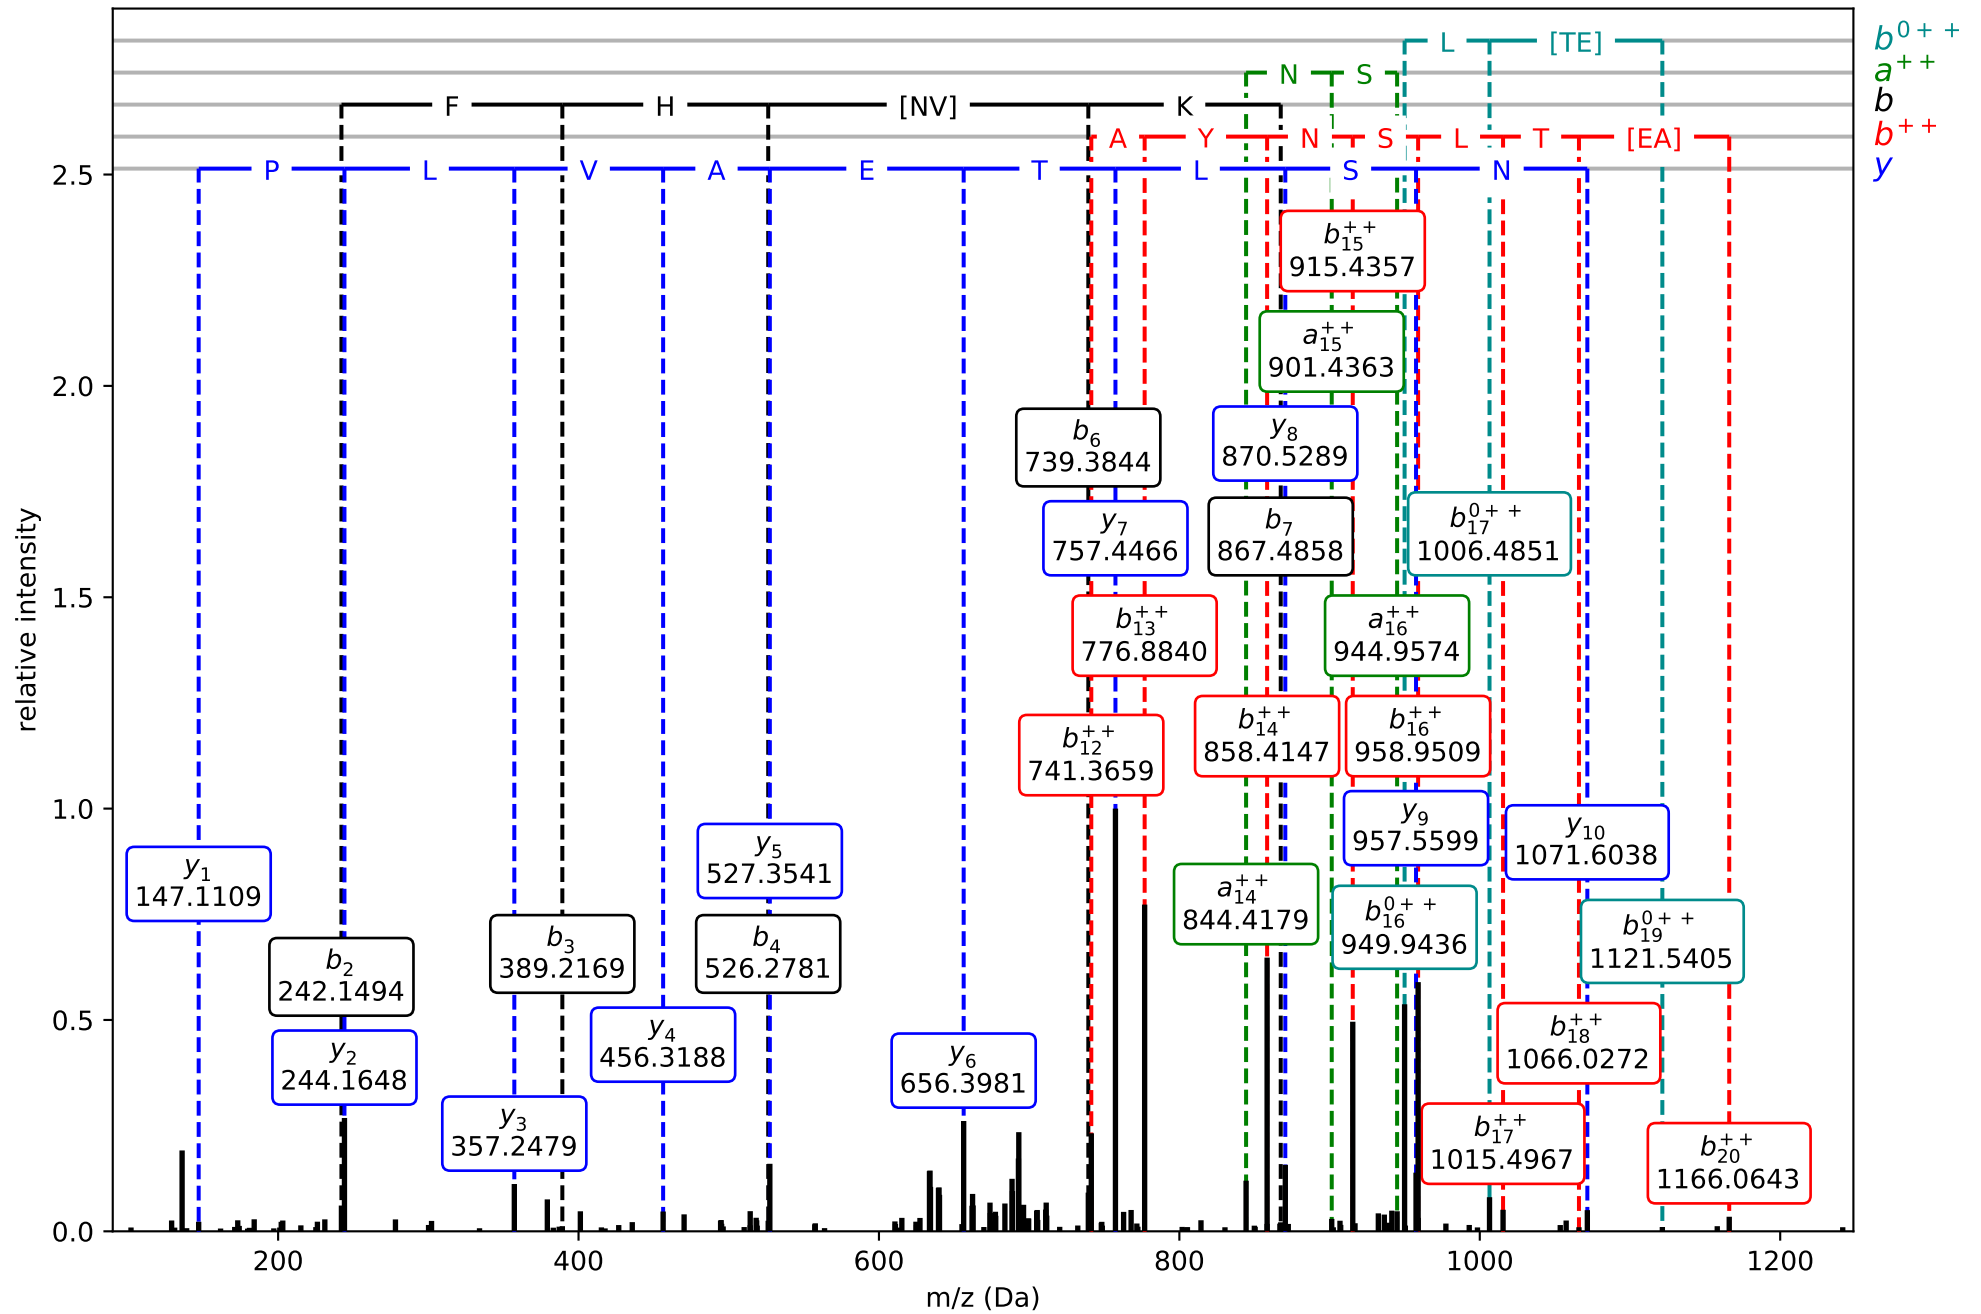

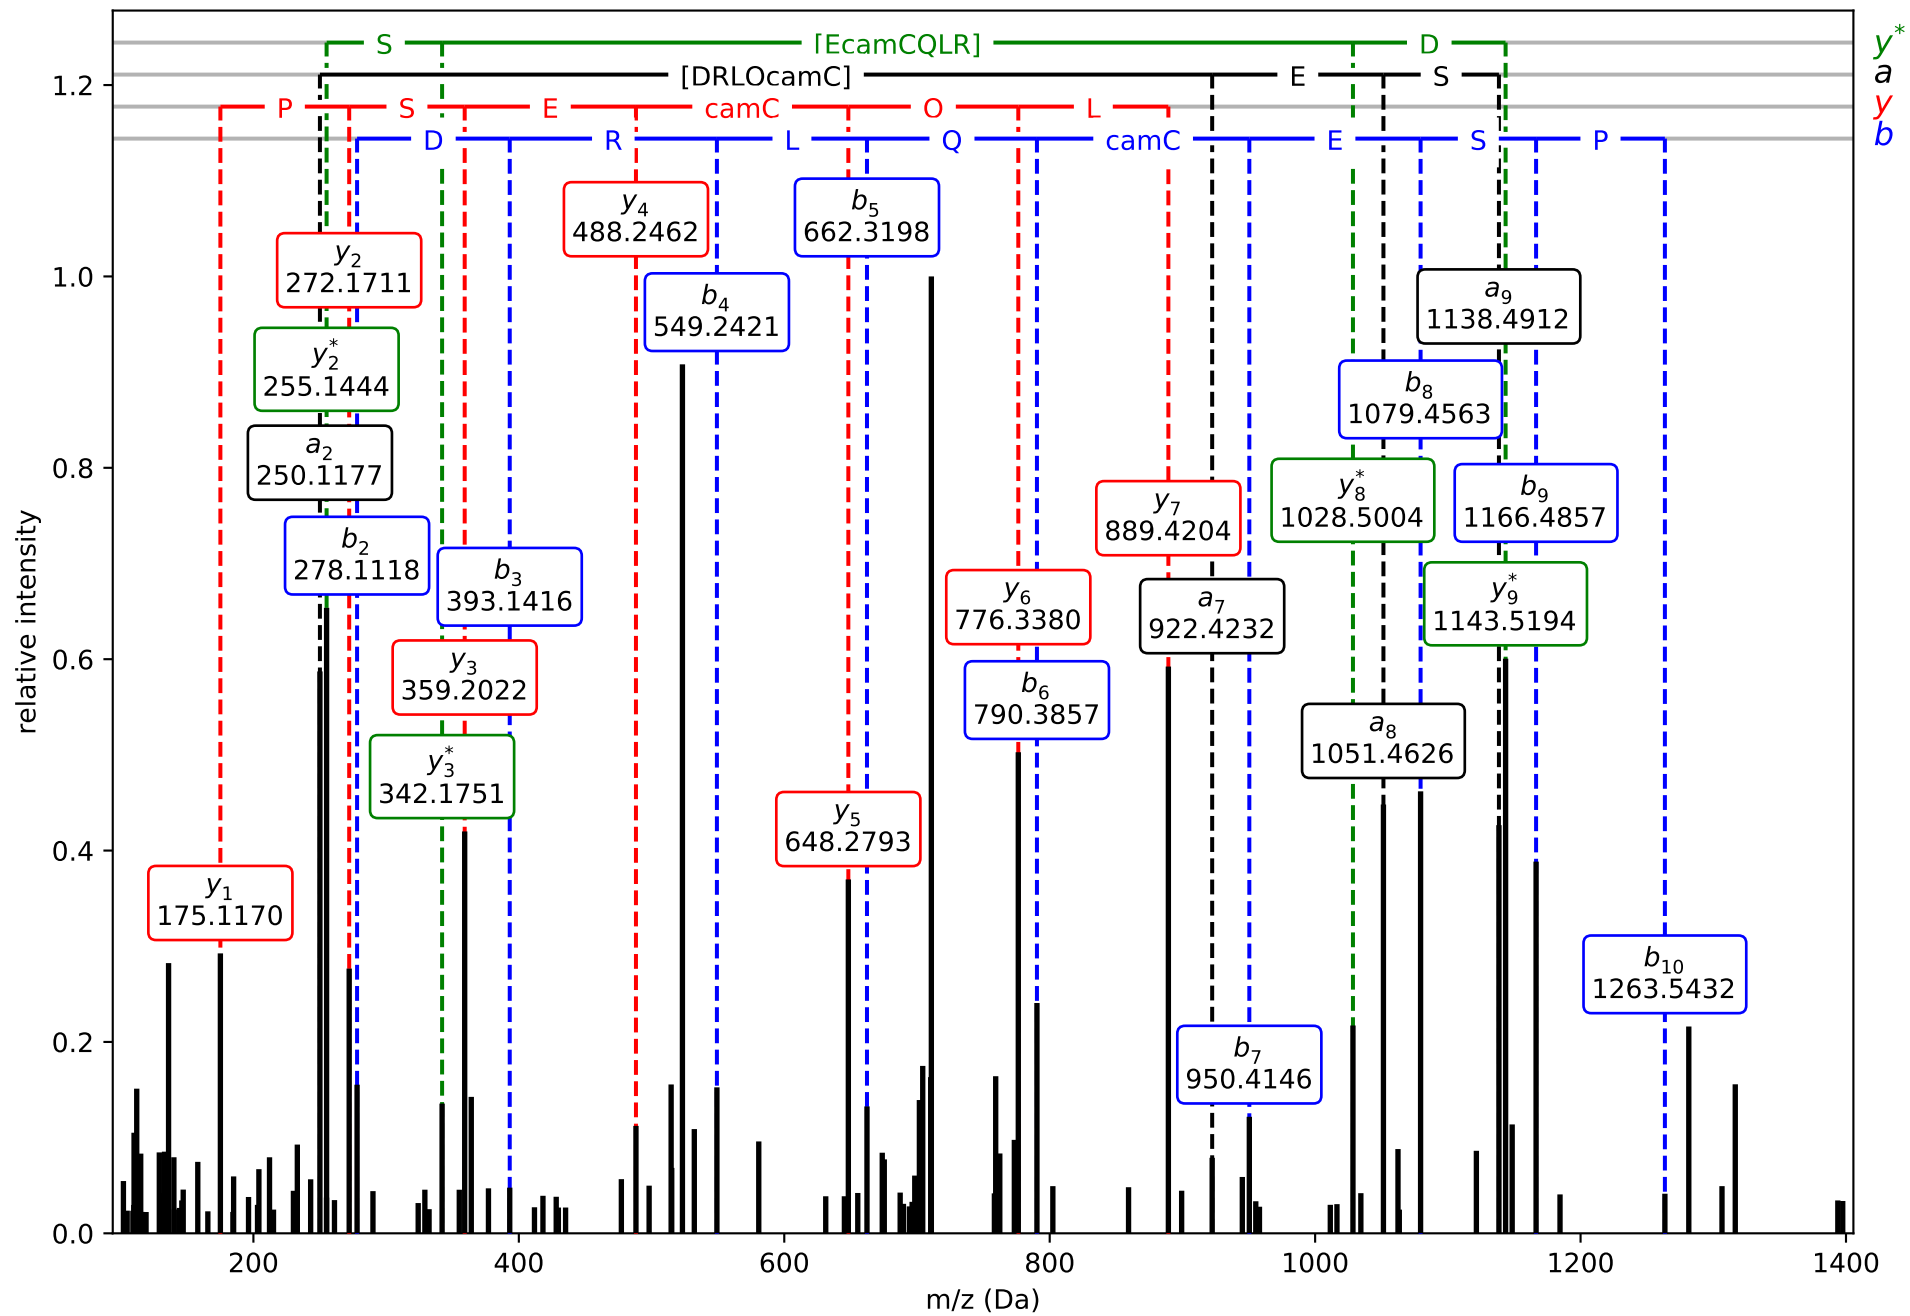



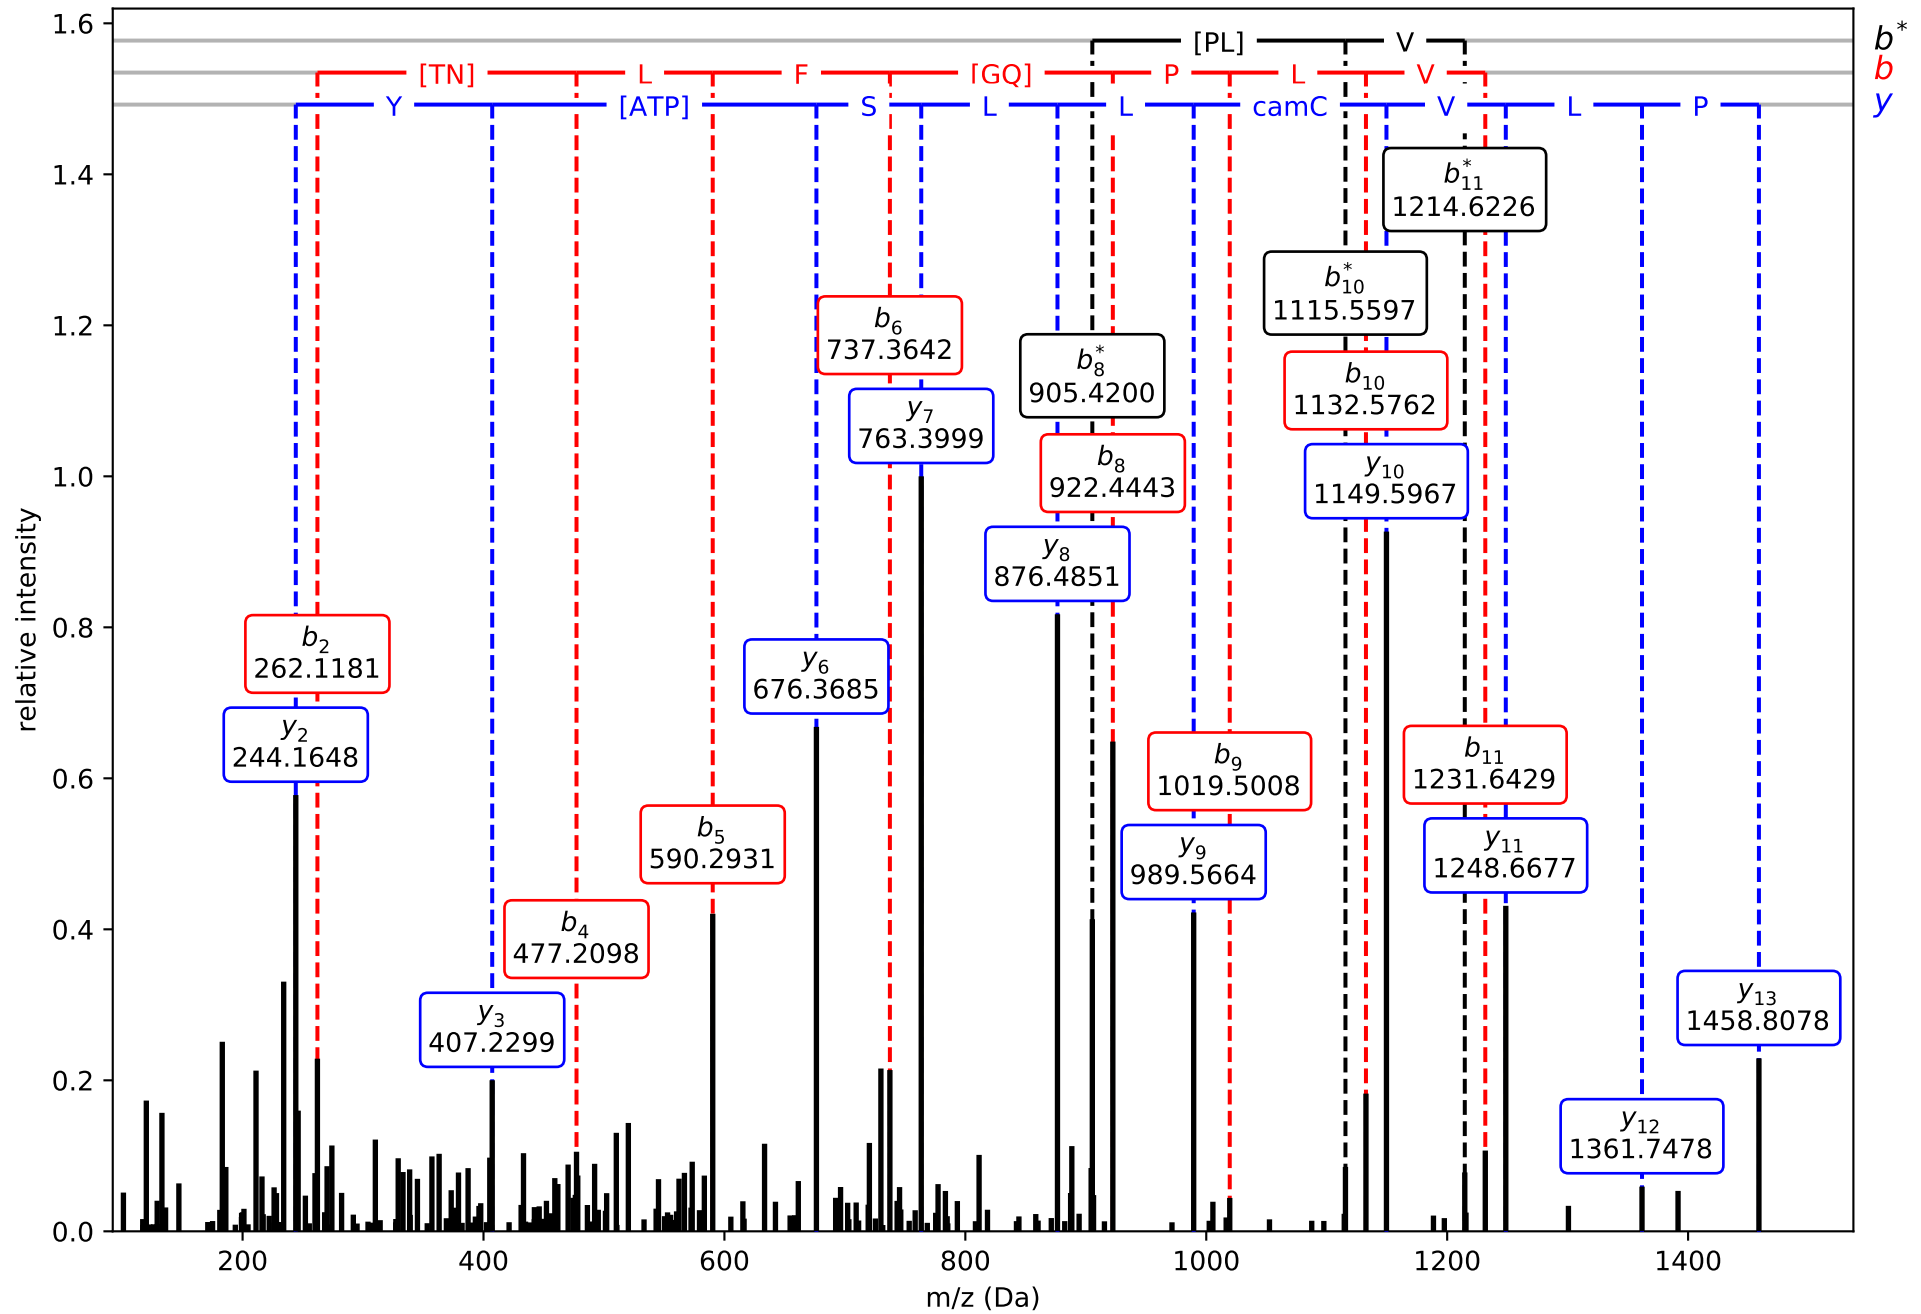

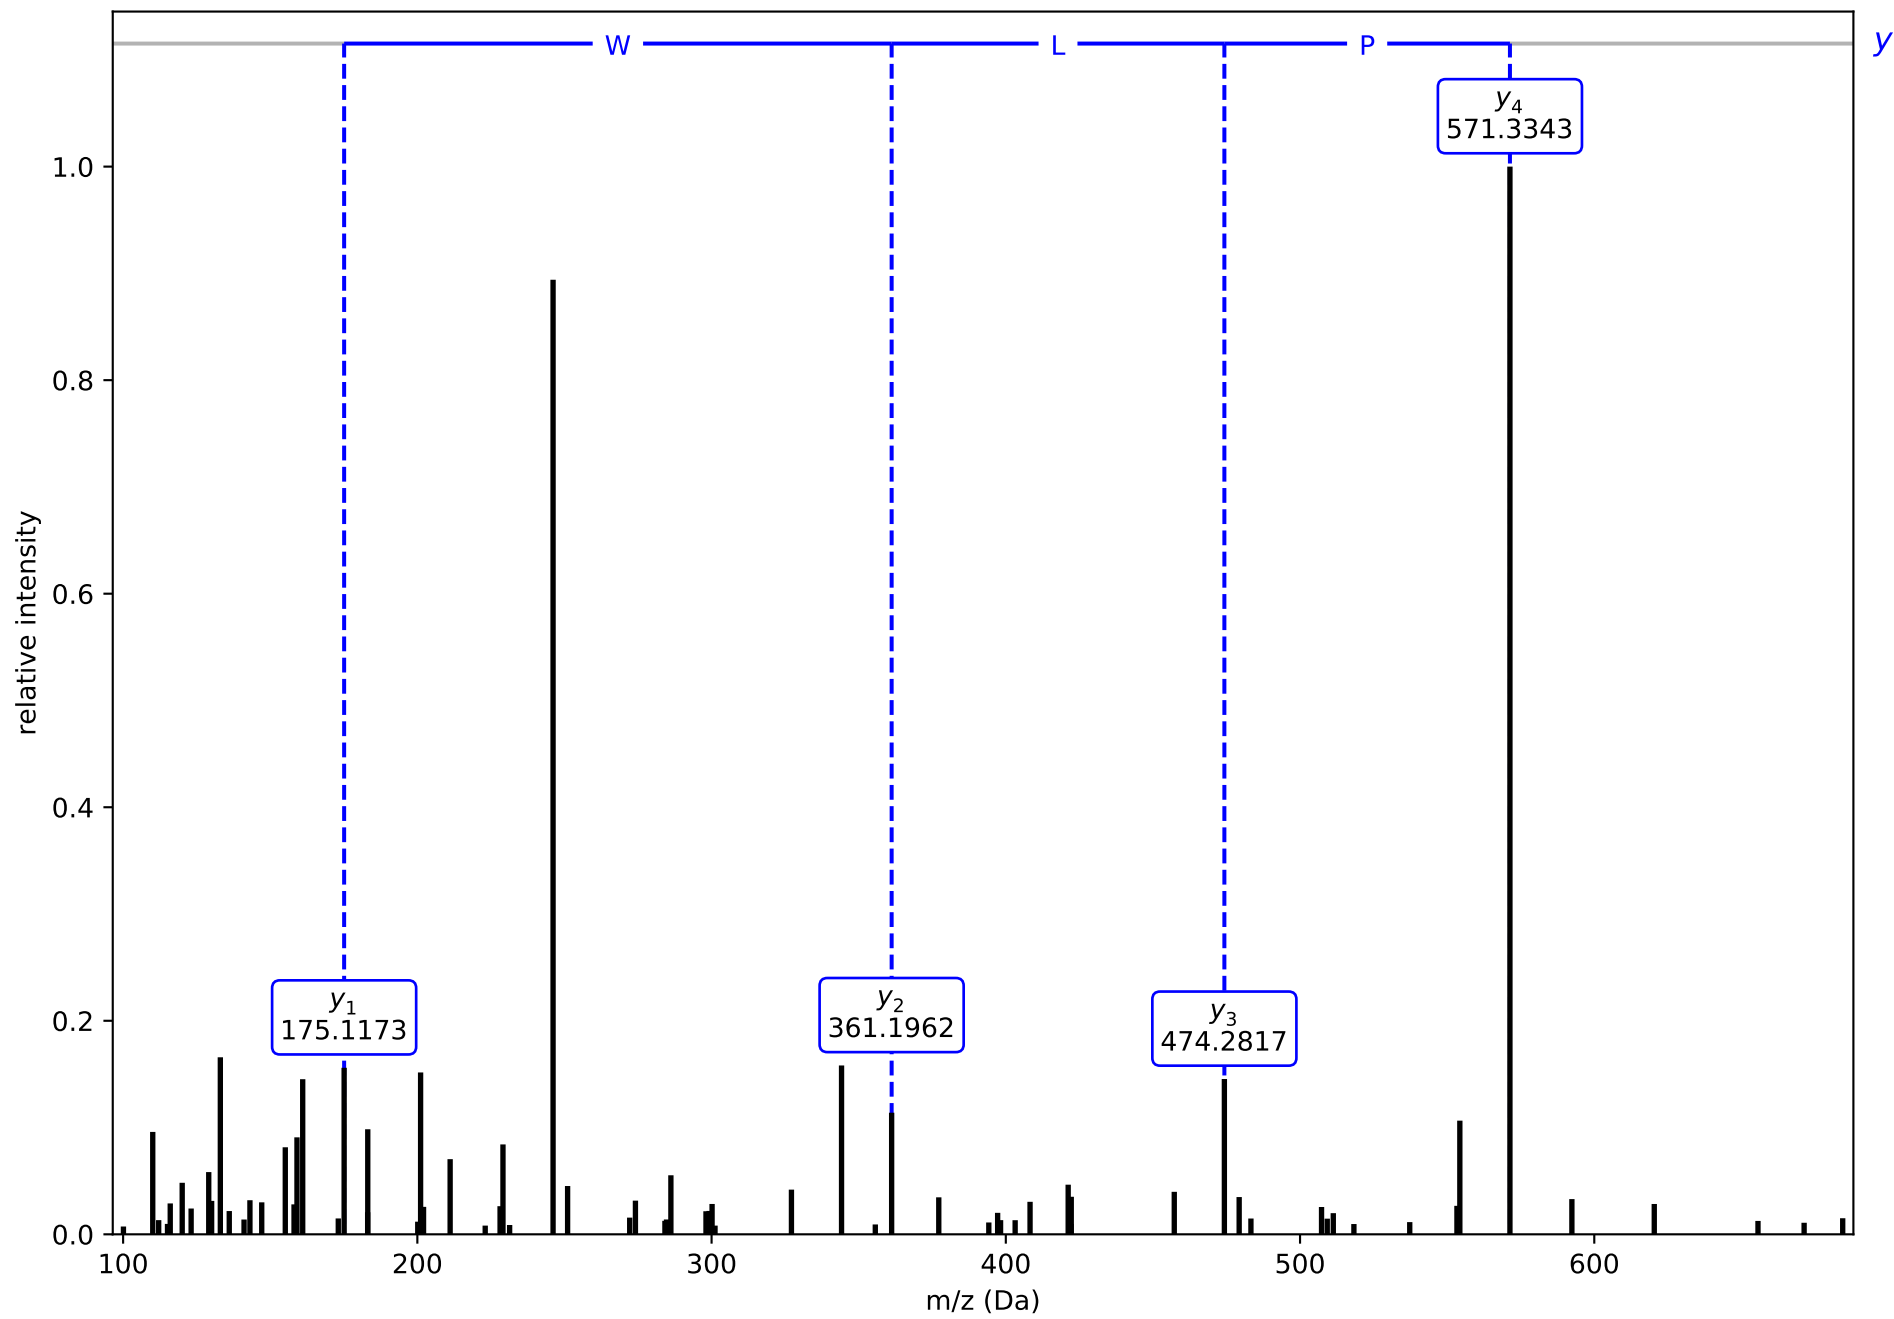

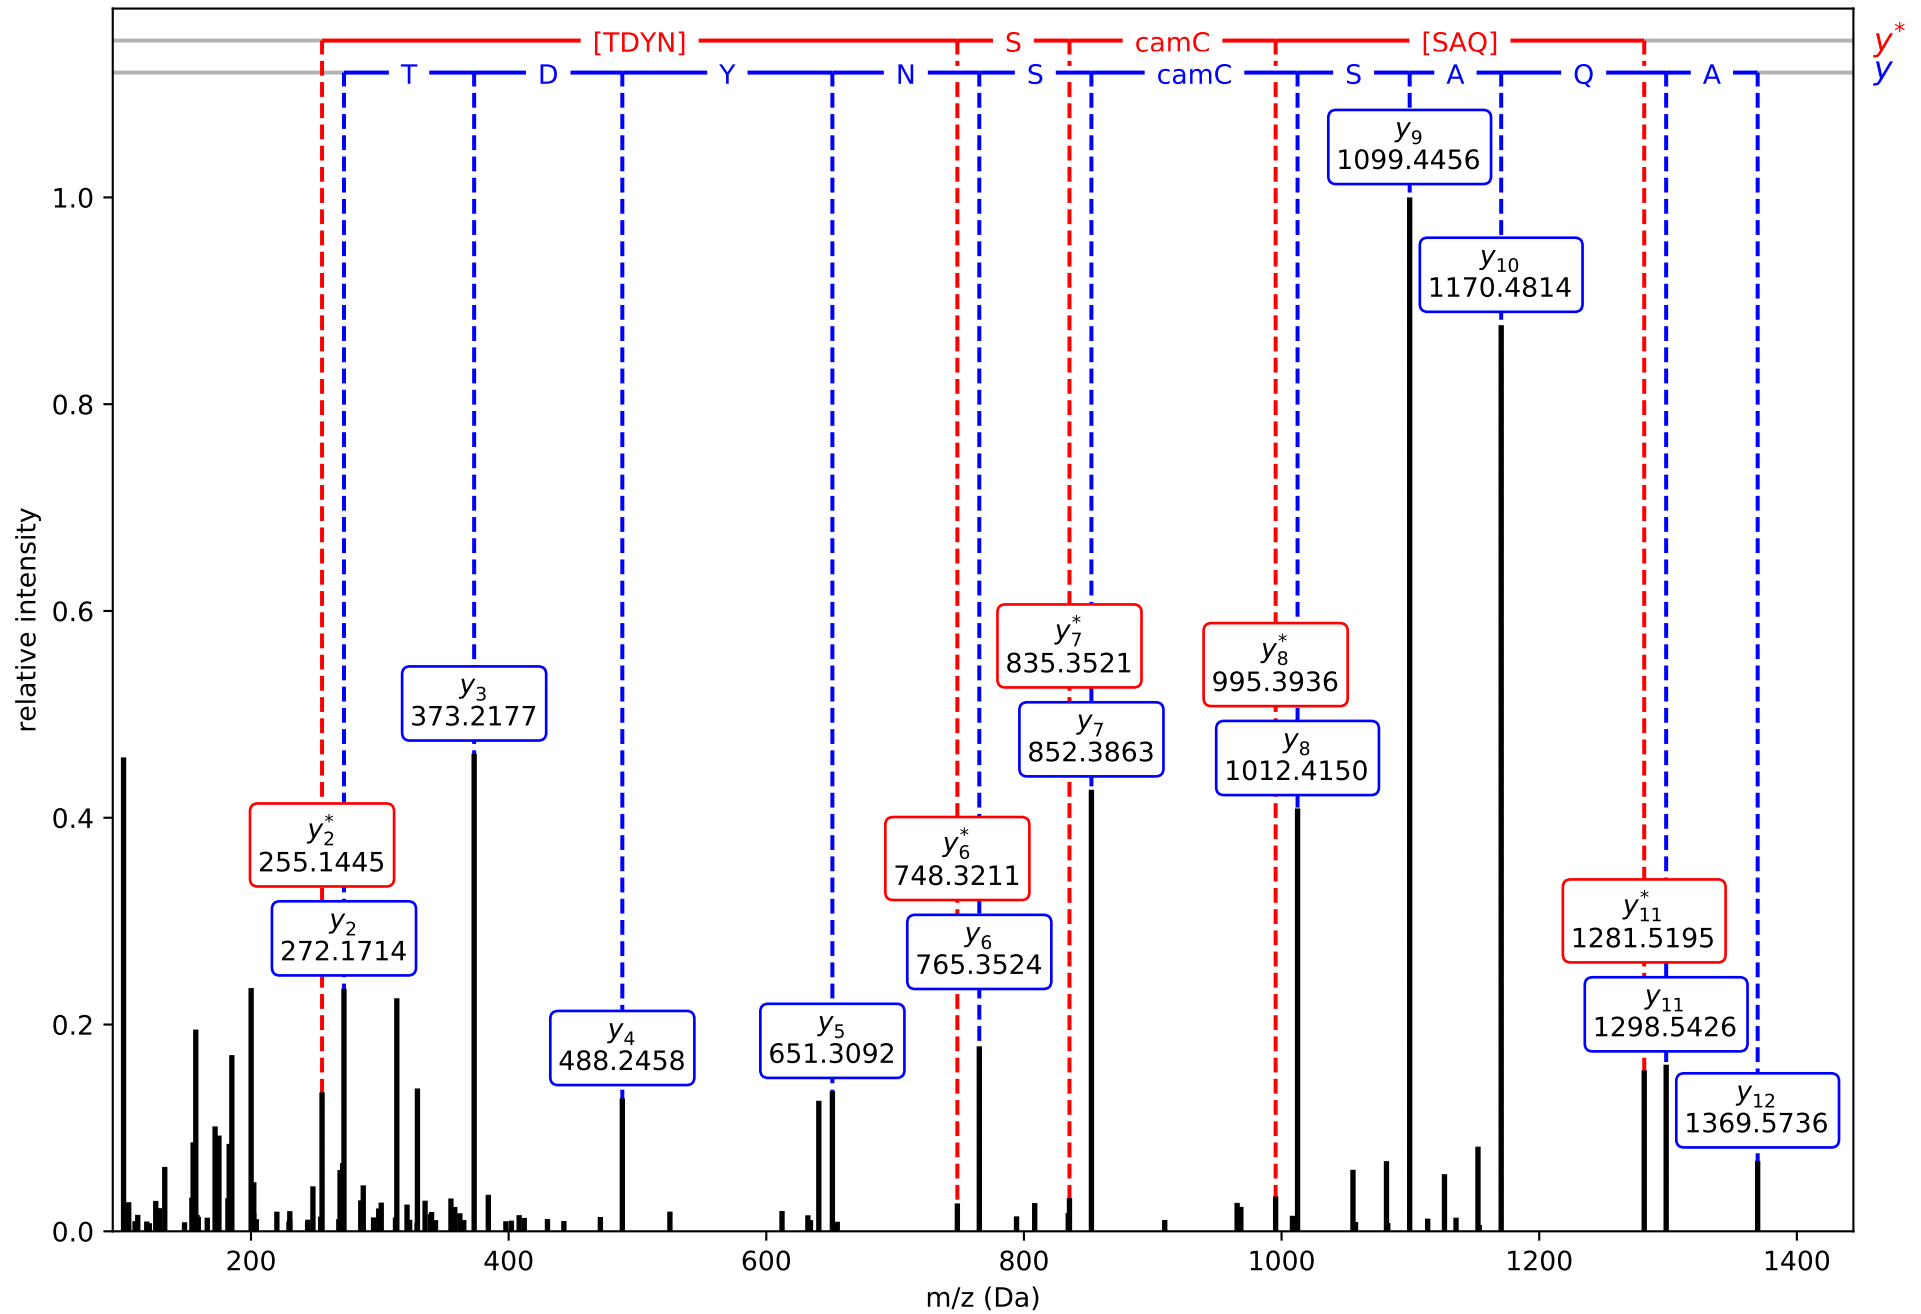

Q4KUS2 : GSAAcamCWLPLGR

parent: 594.3026, 2+

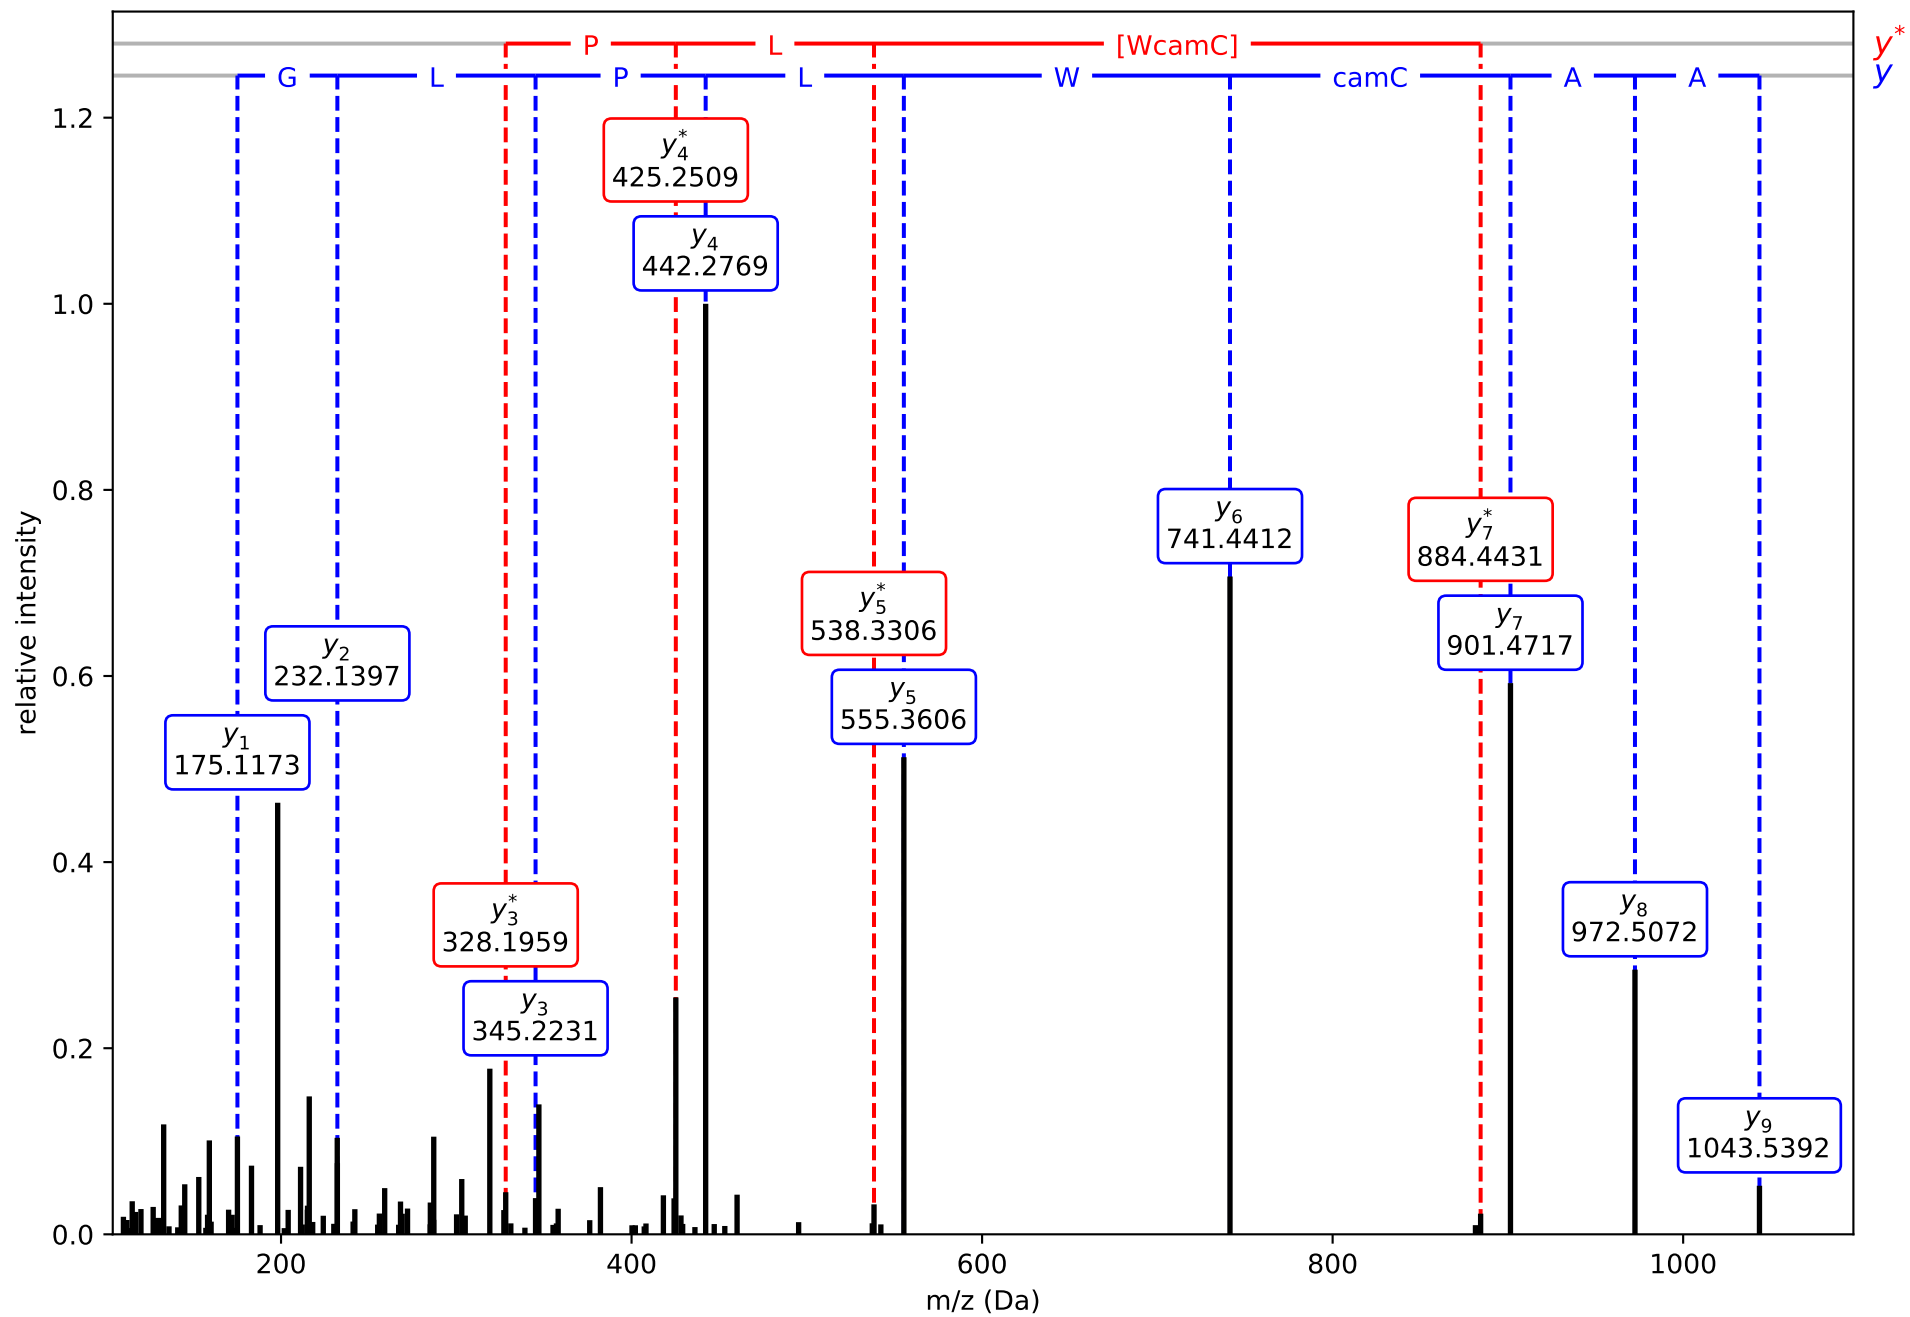

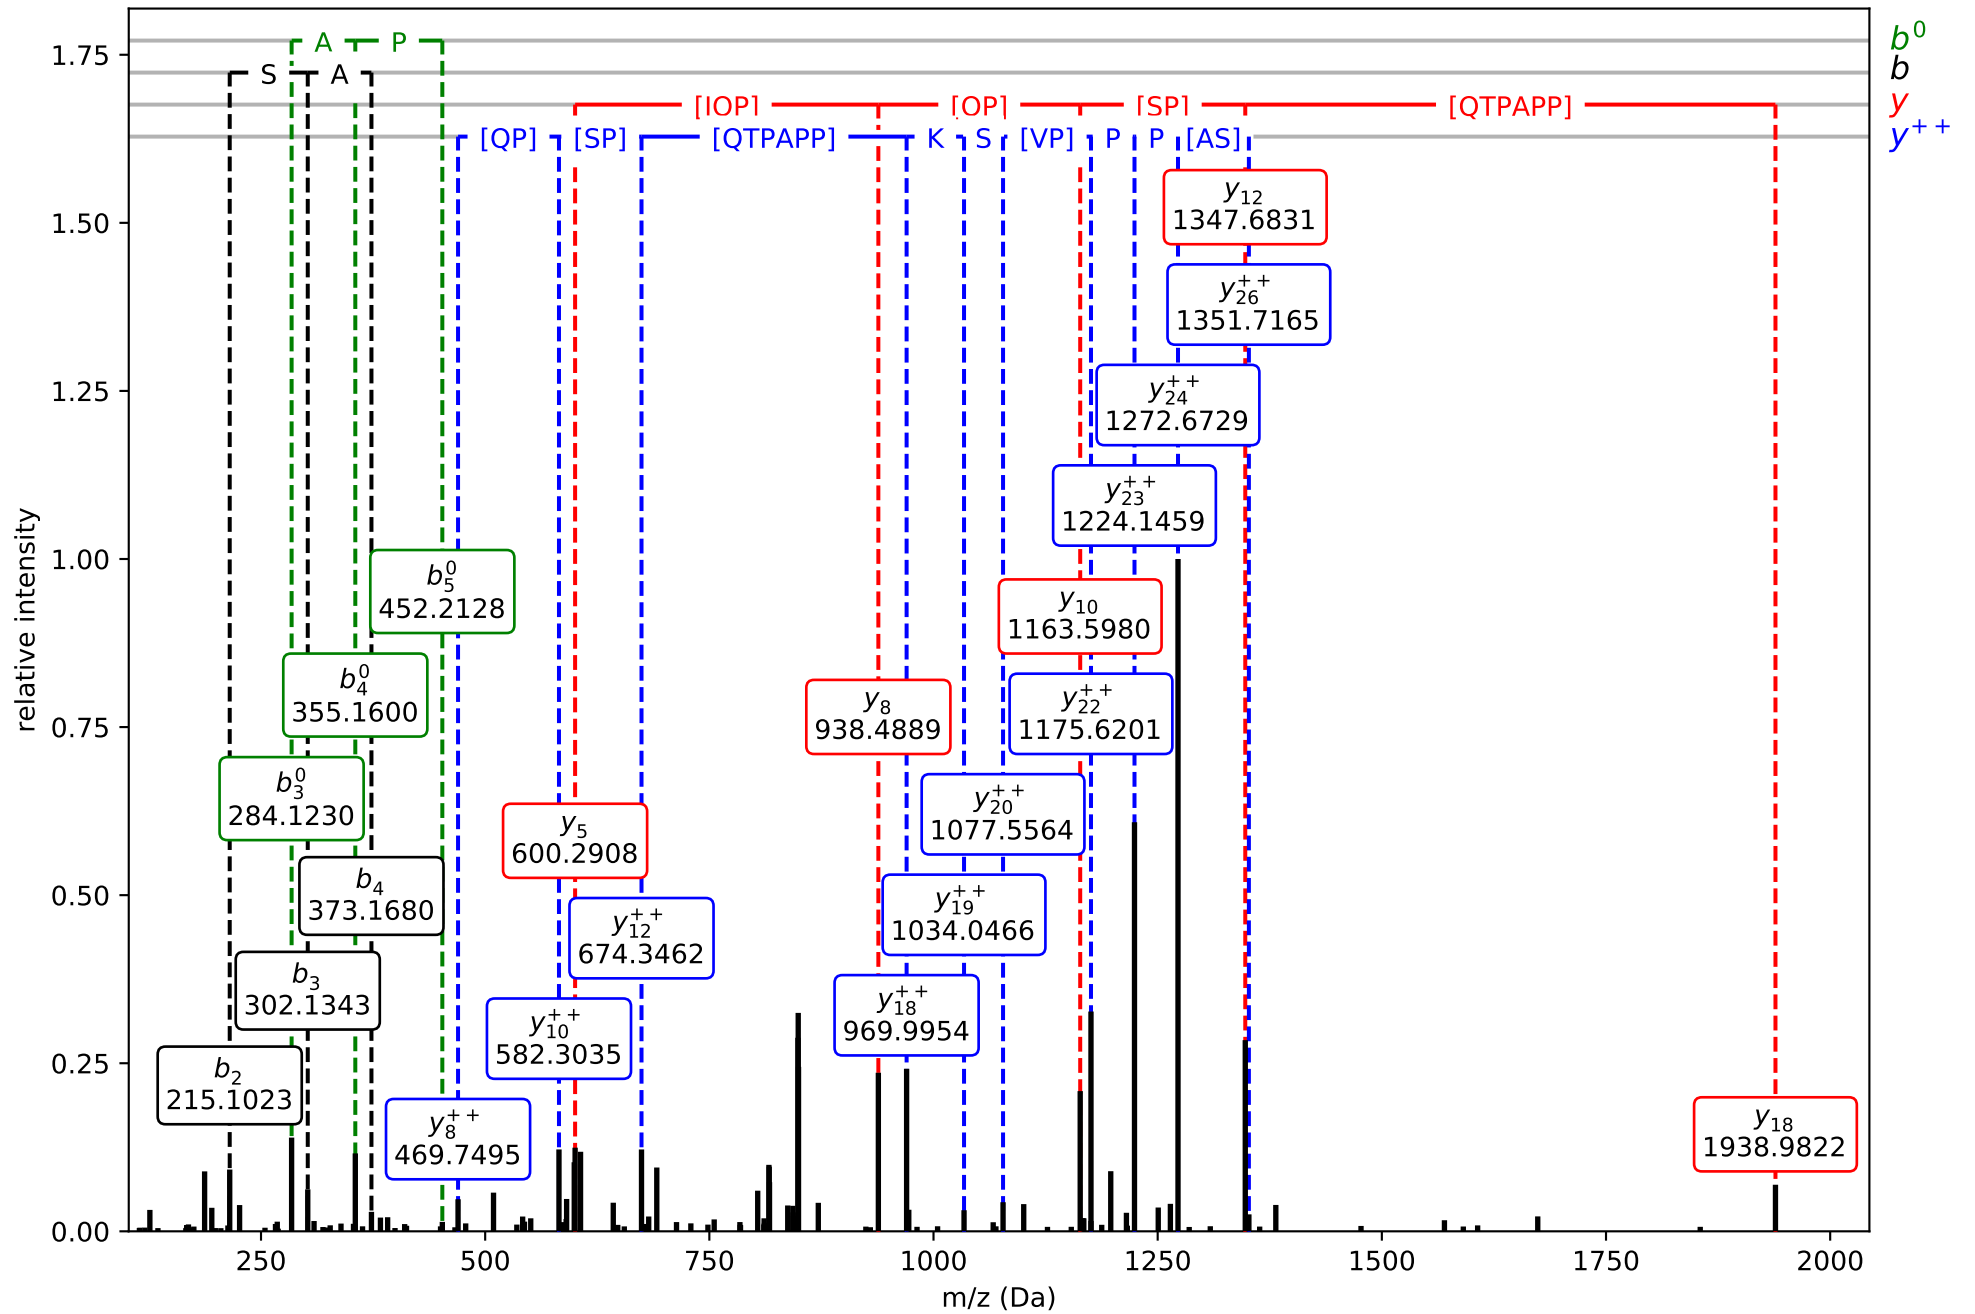

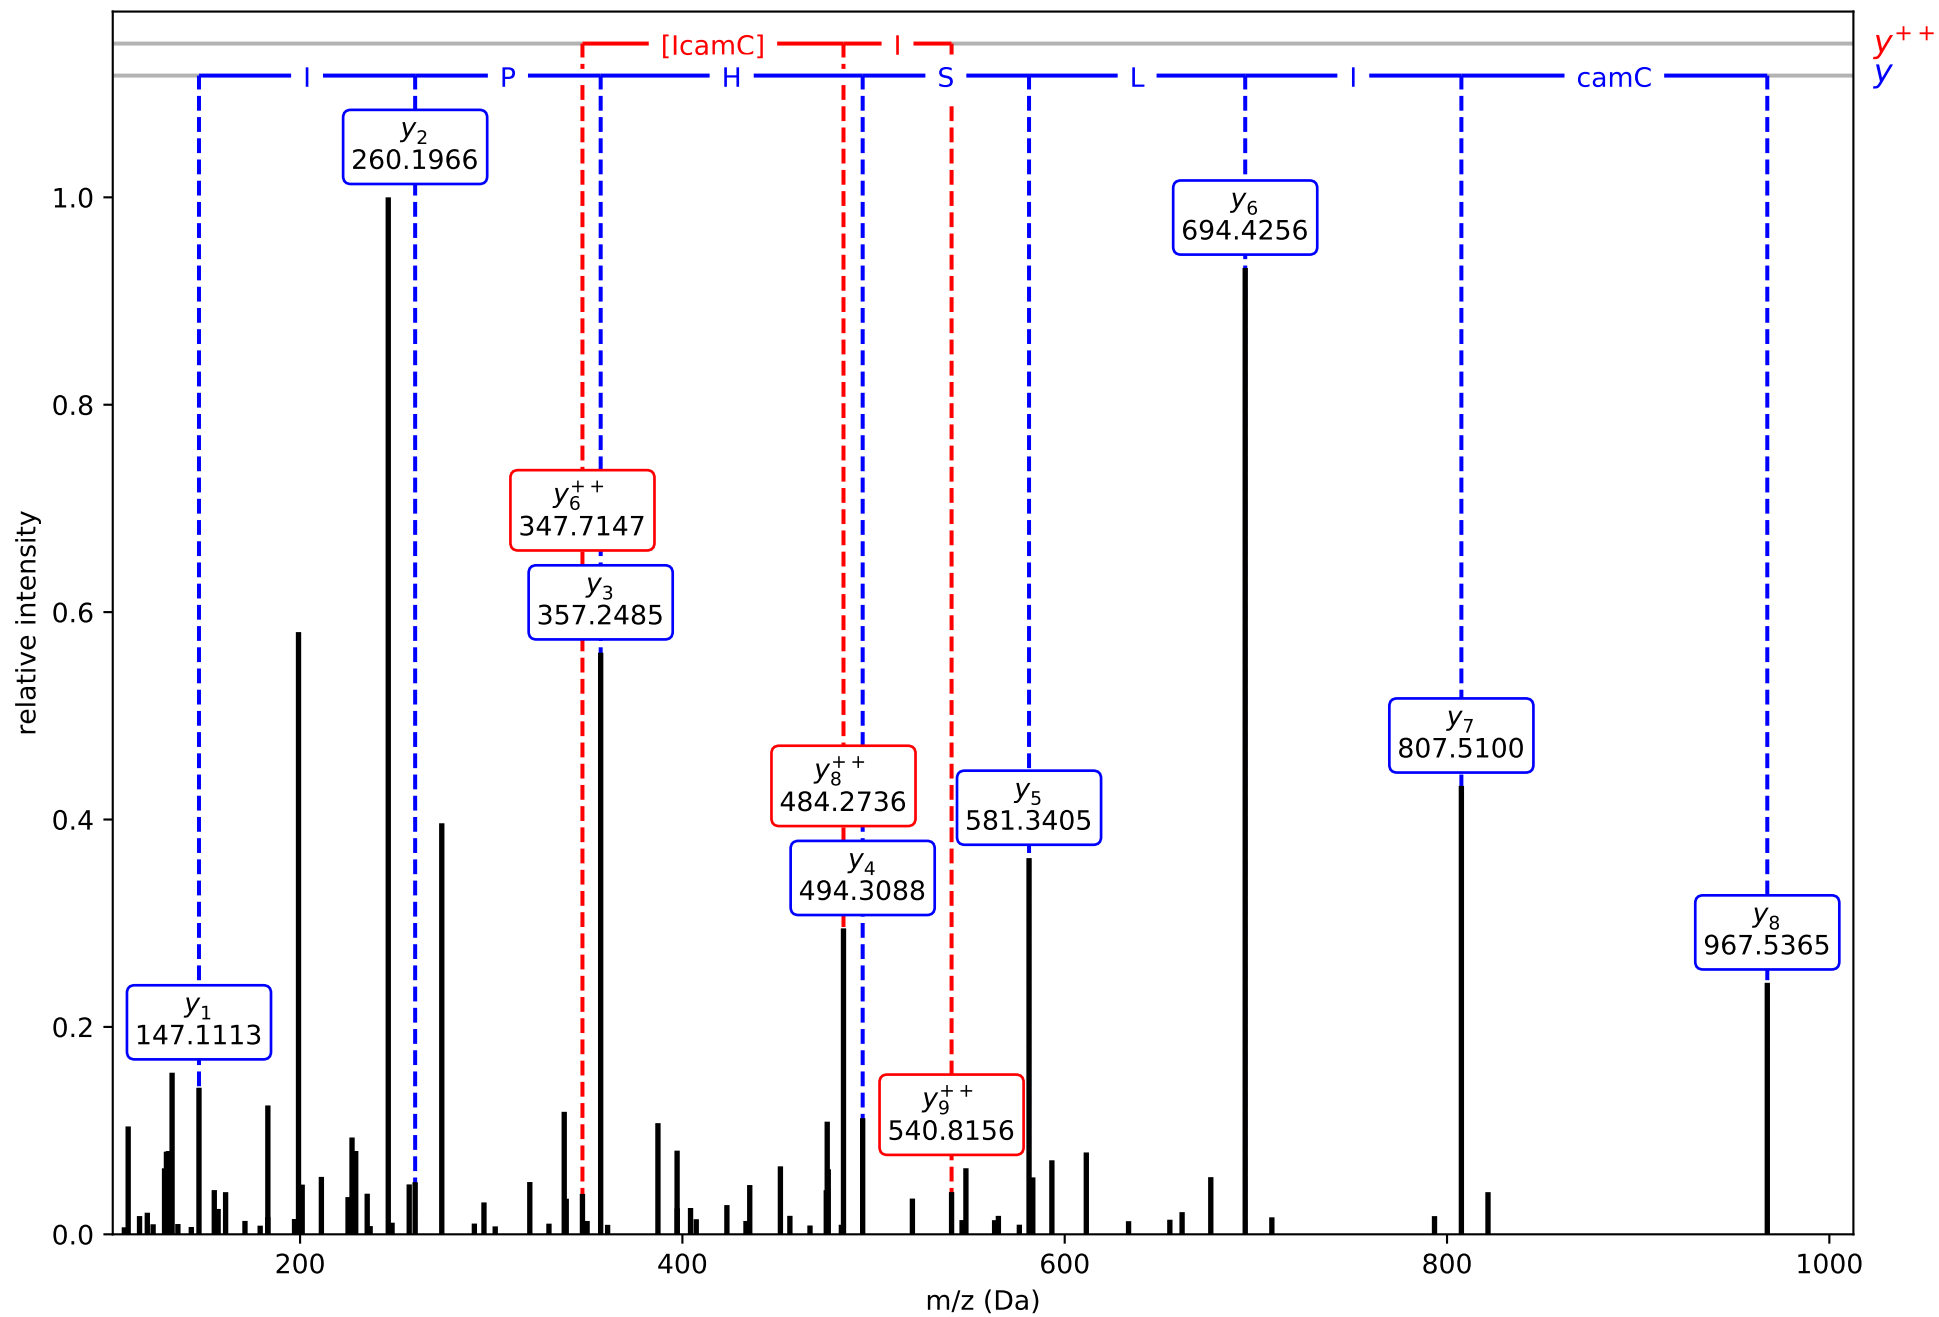

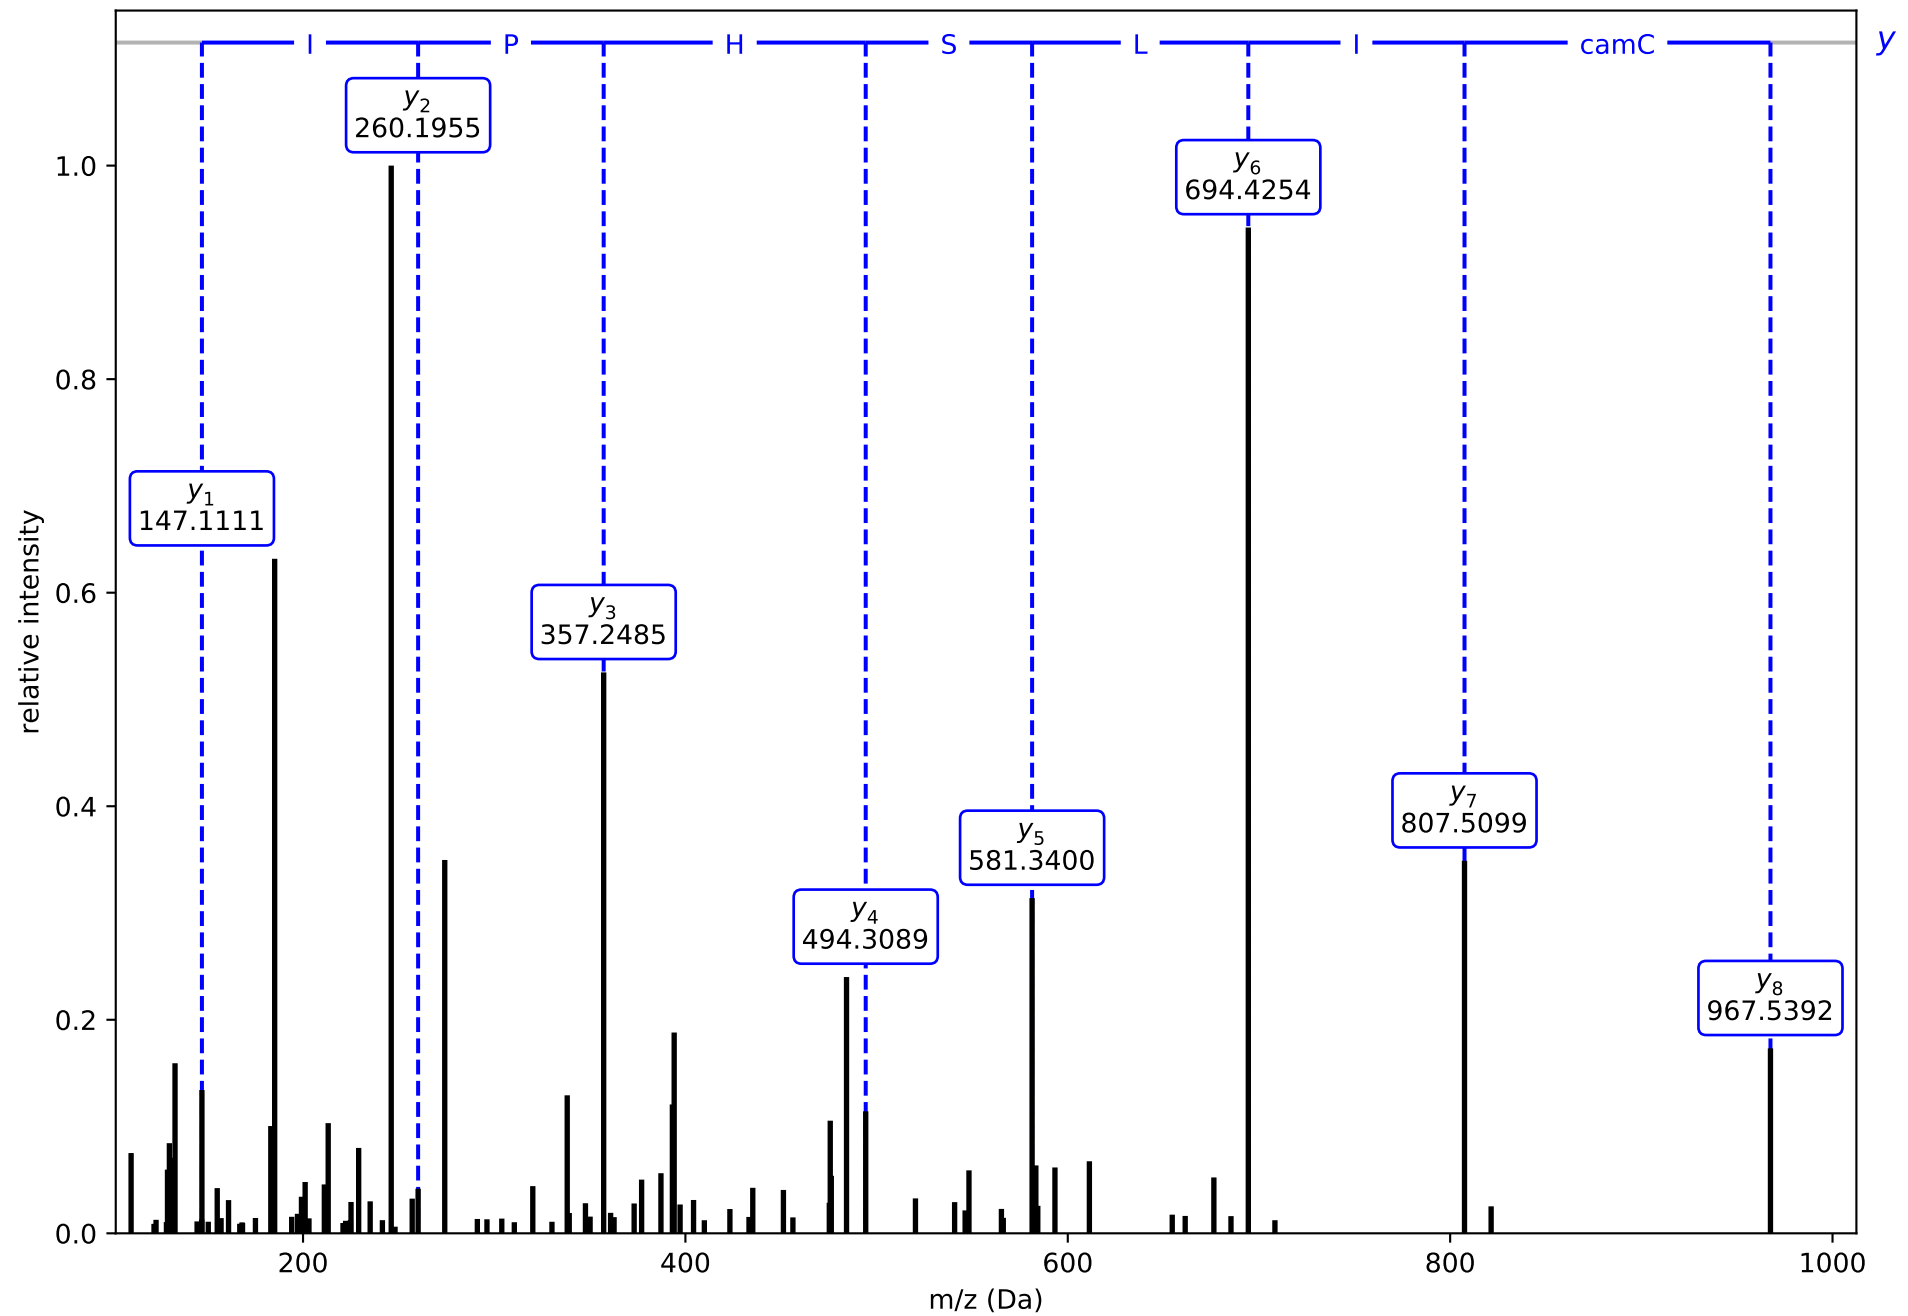

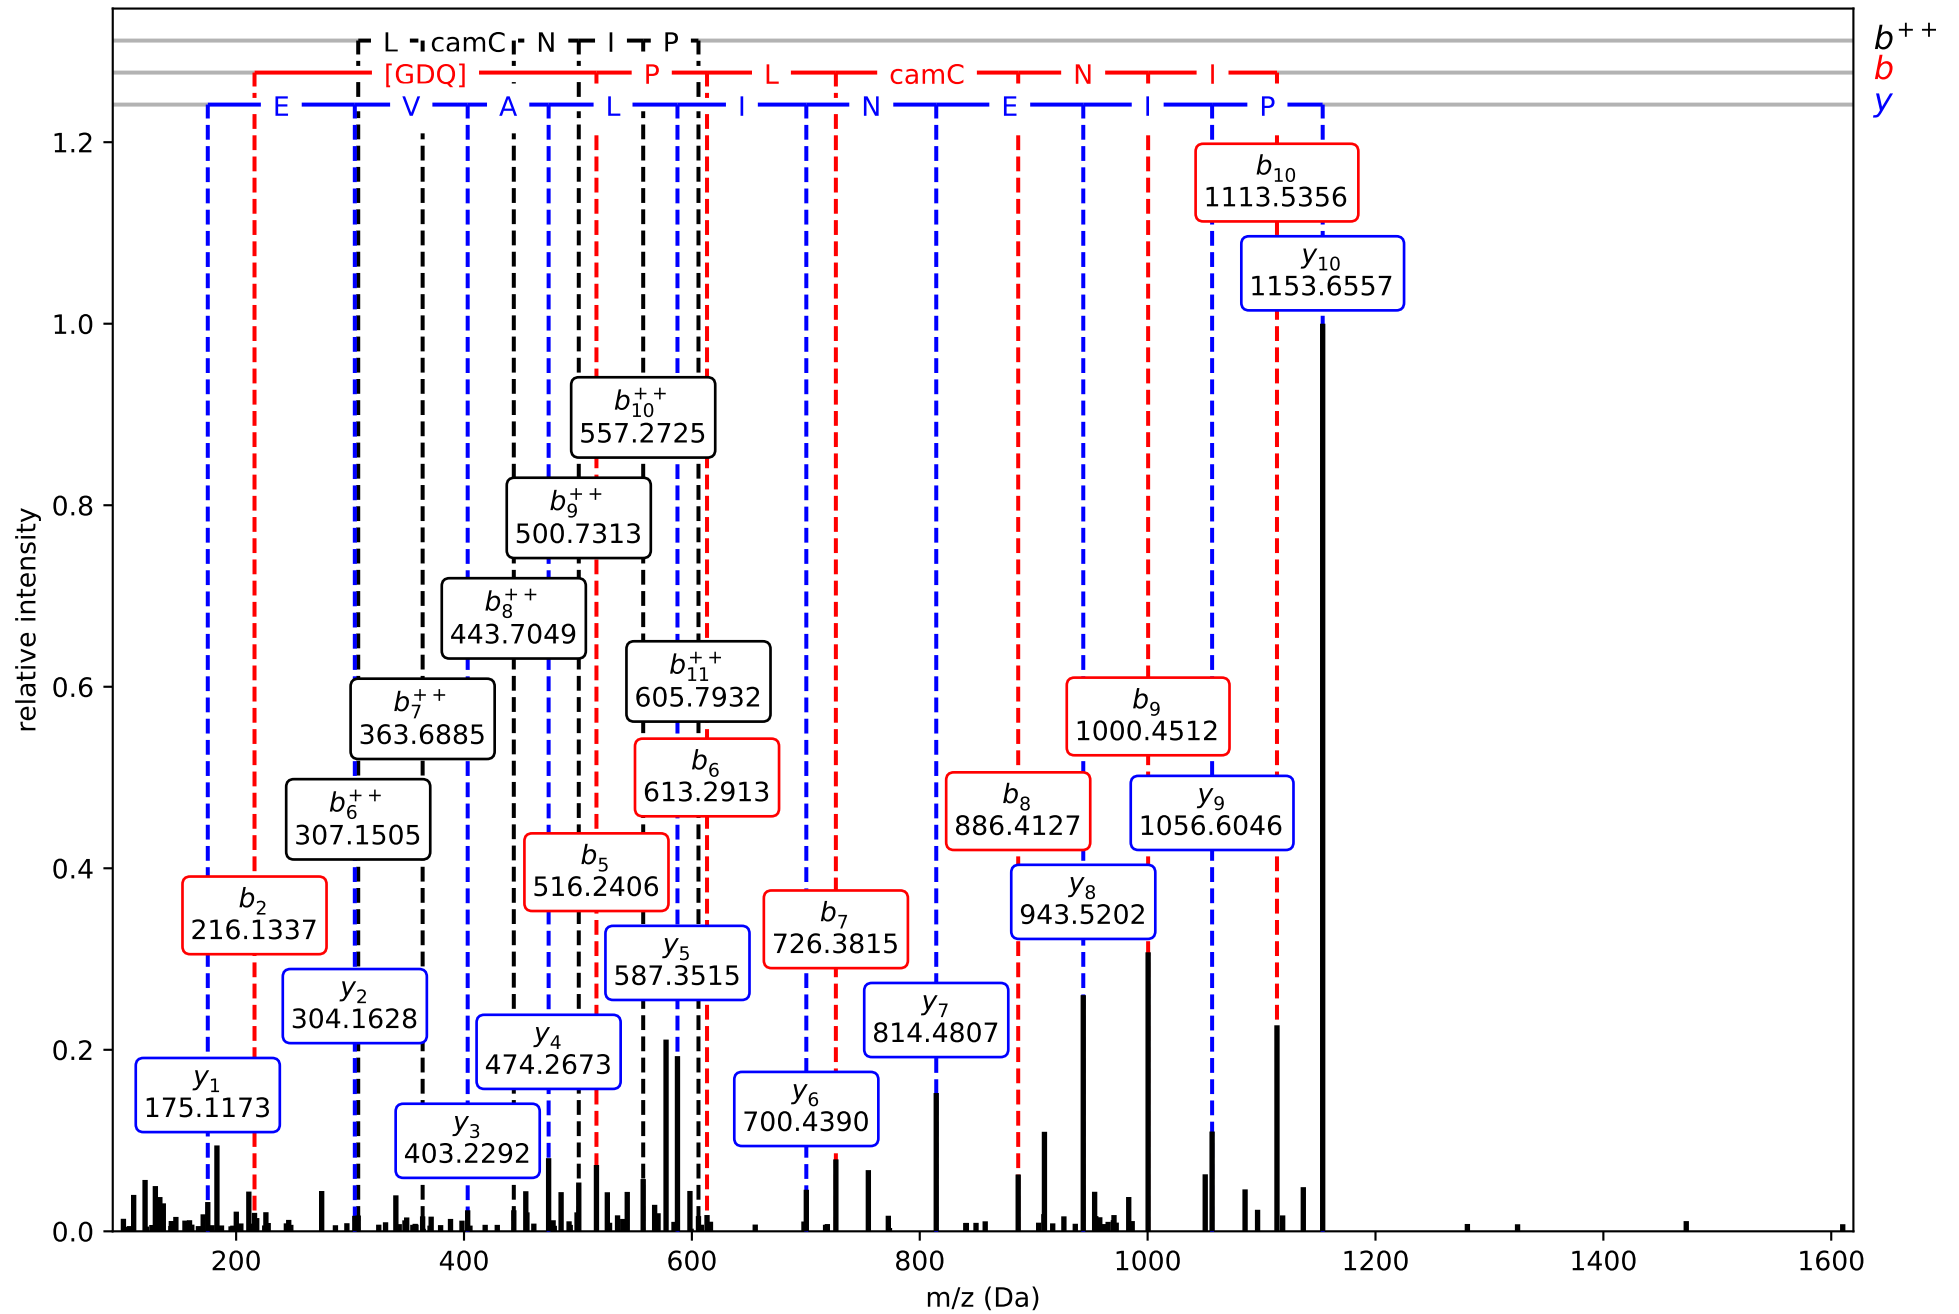



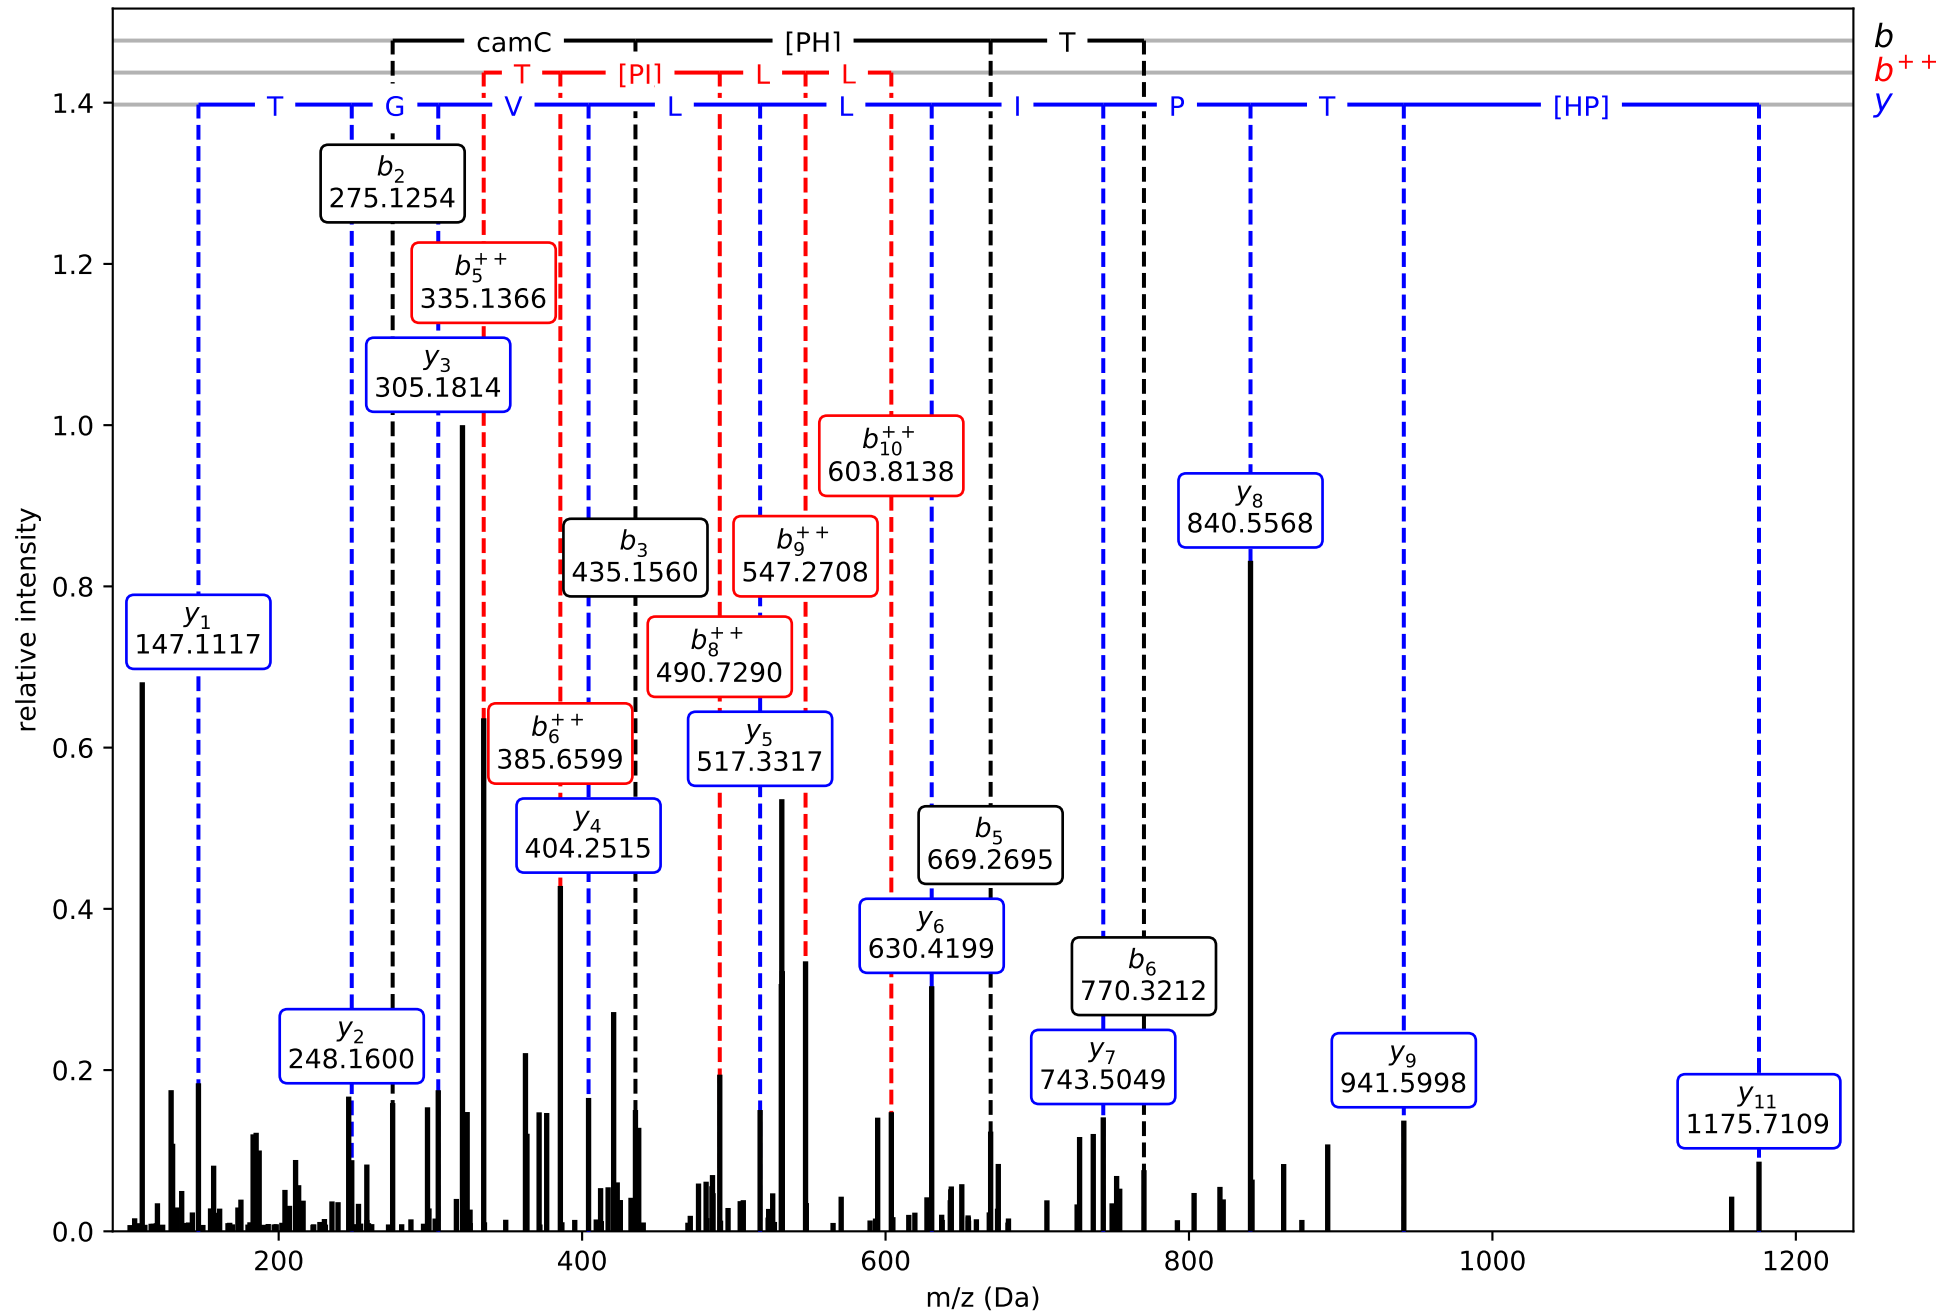

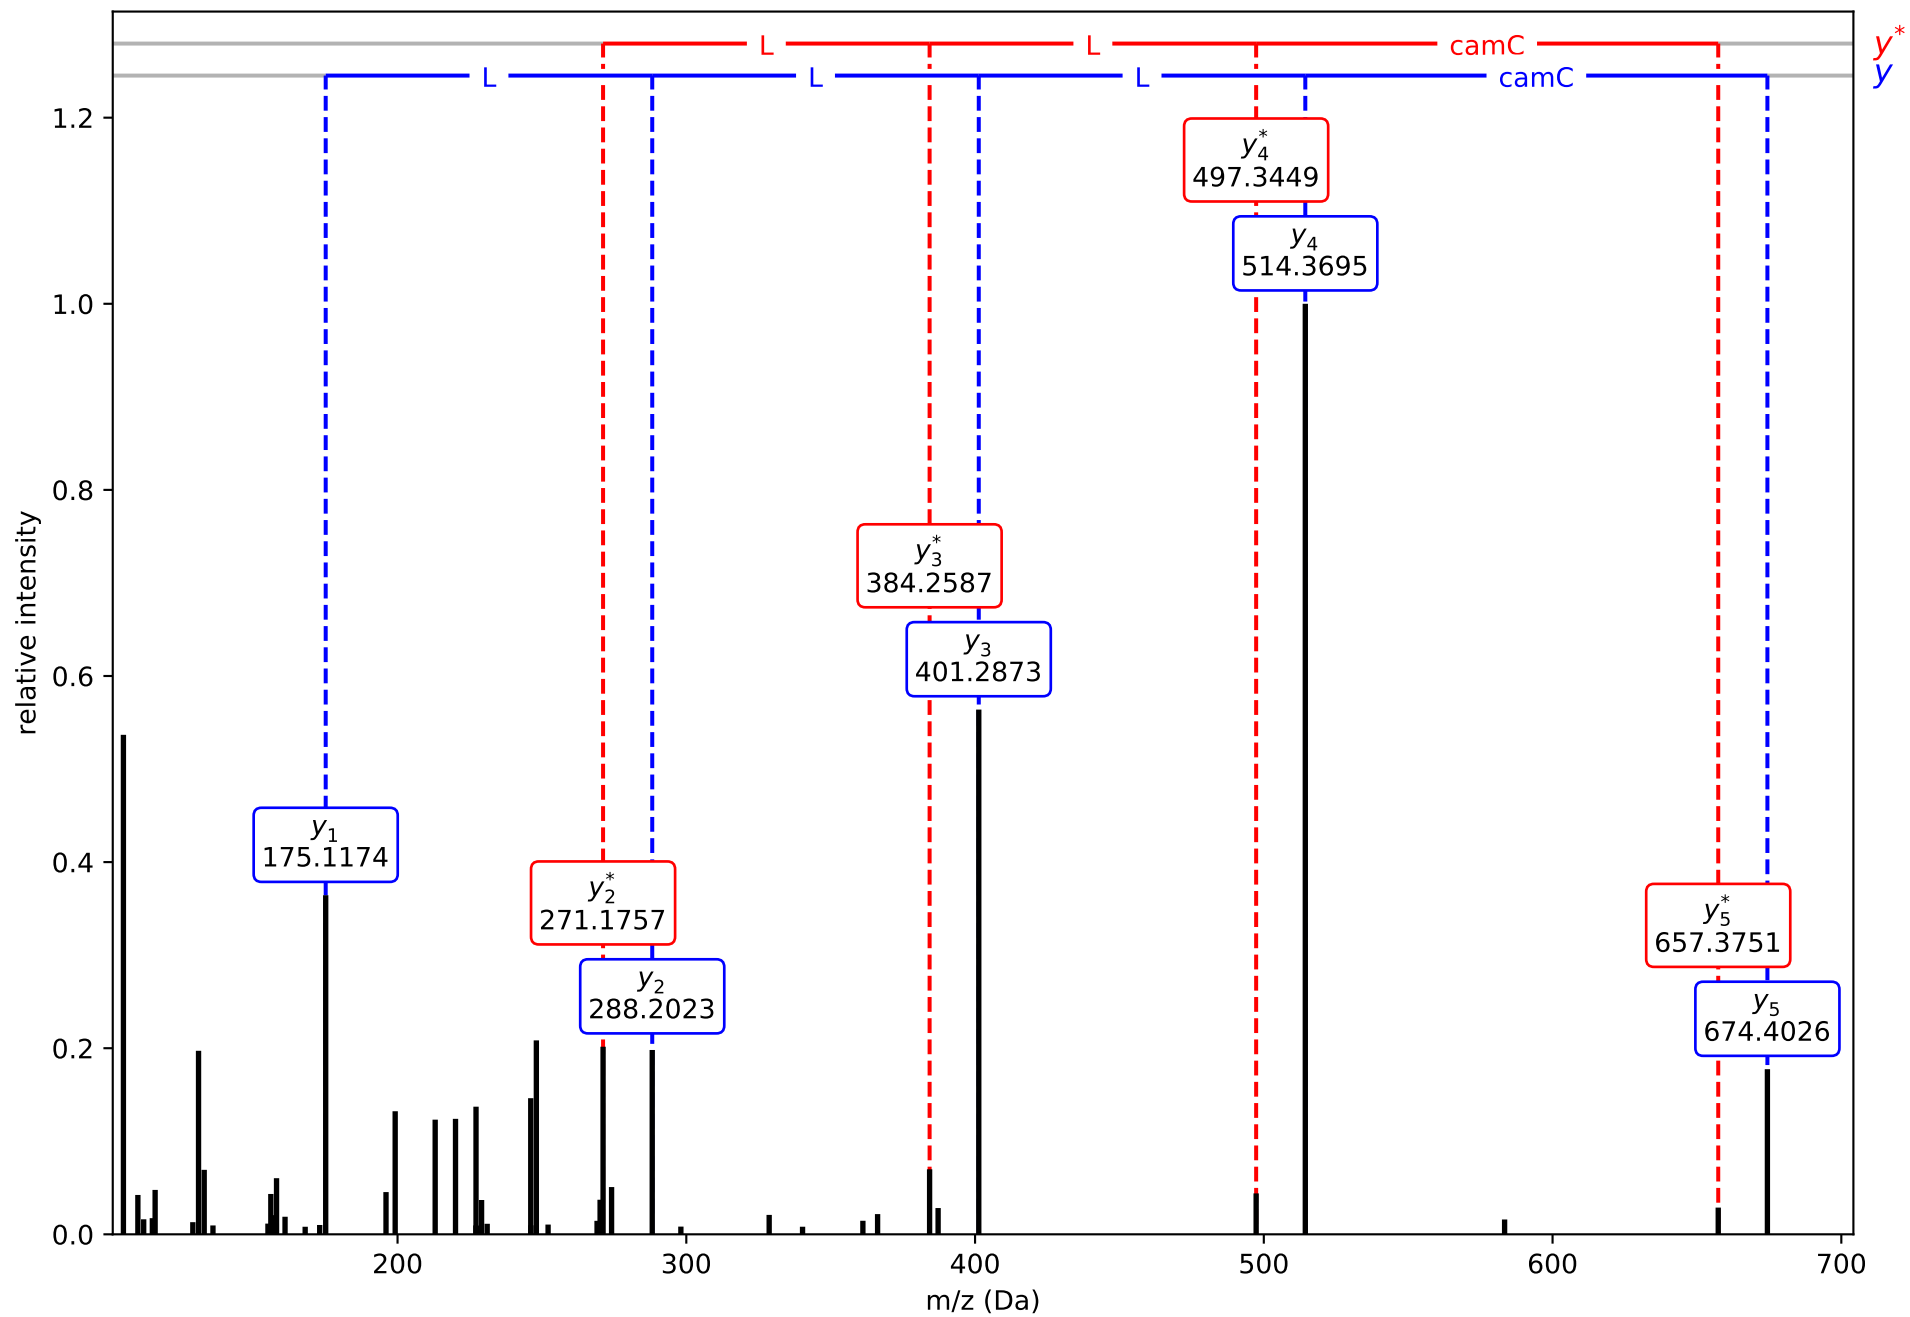

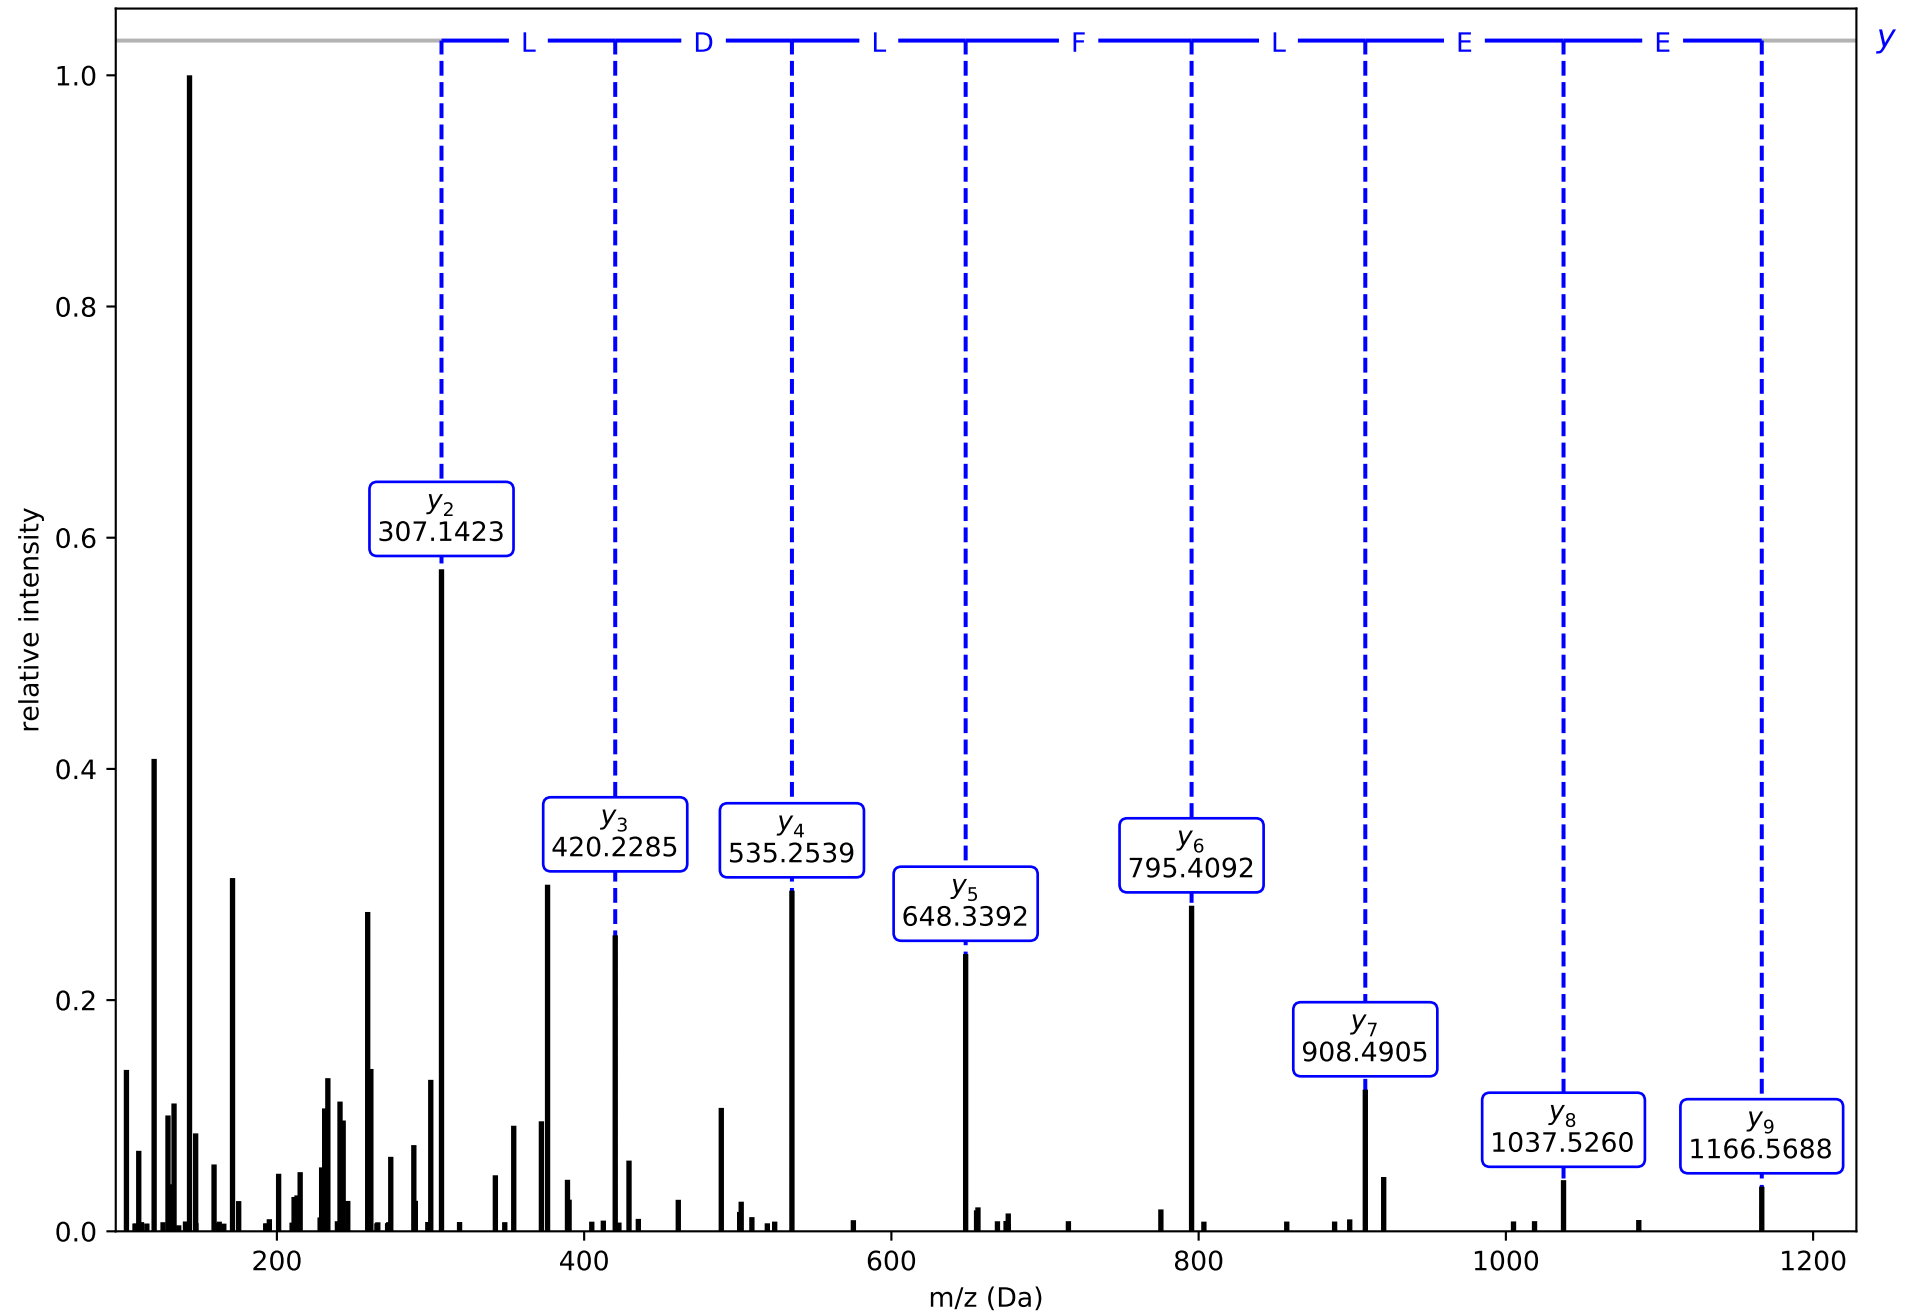

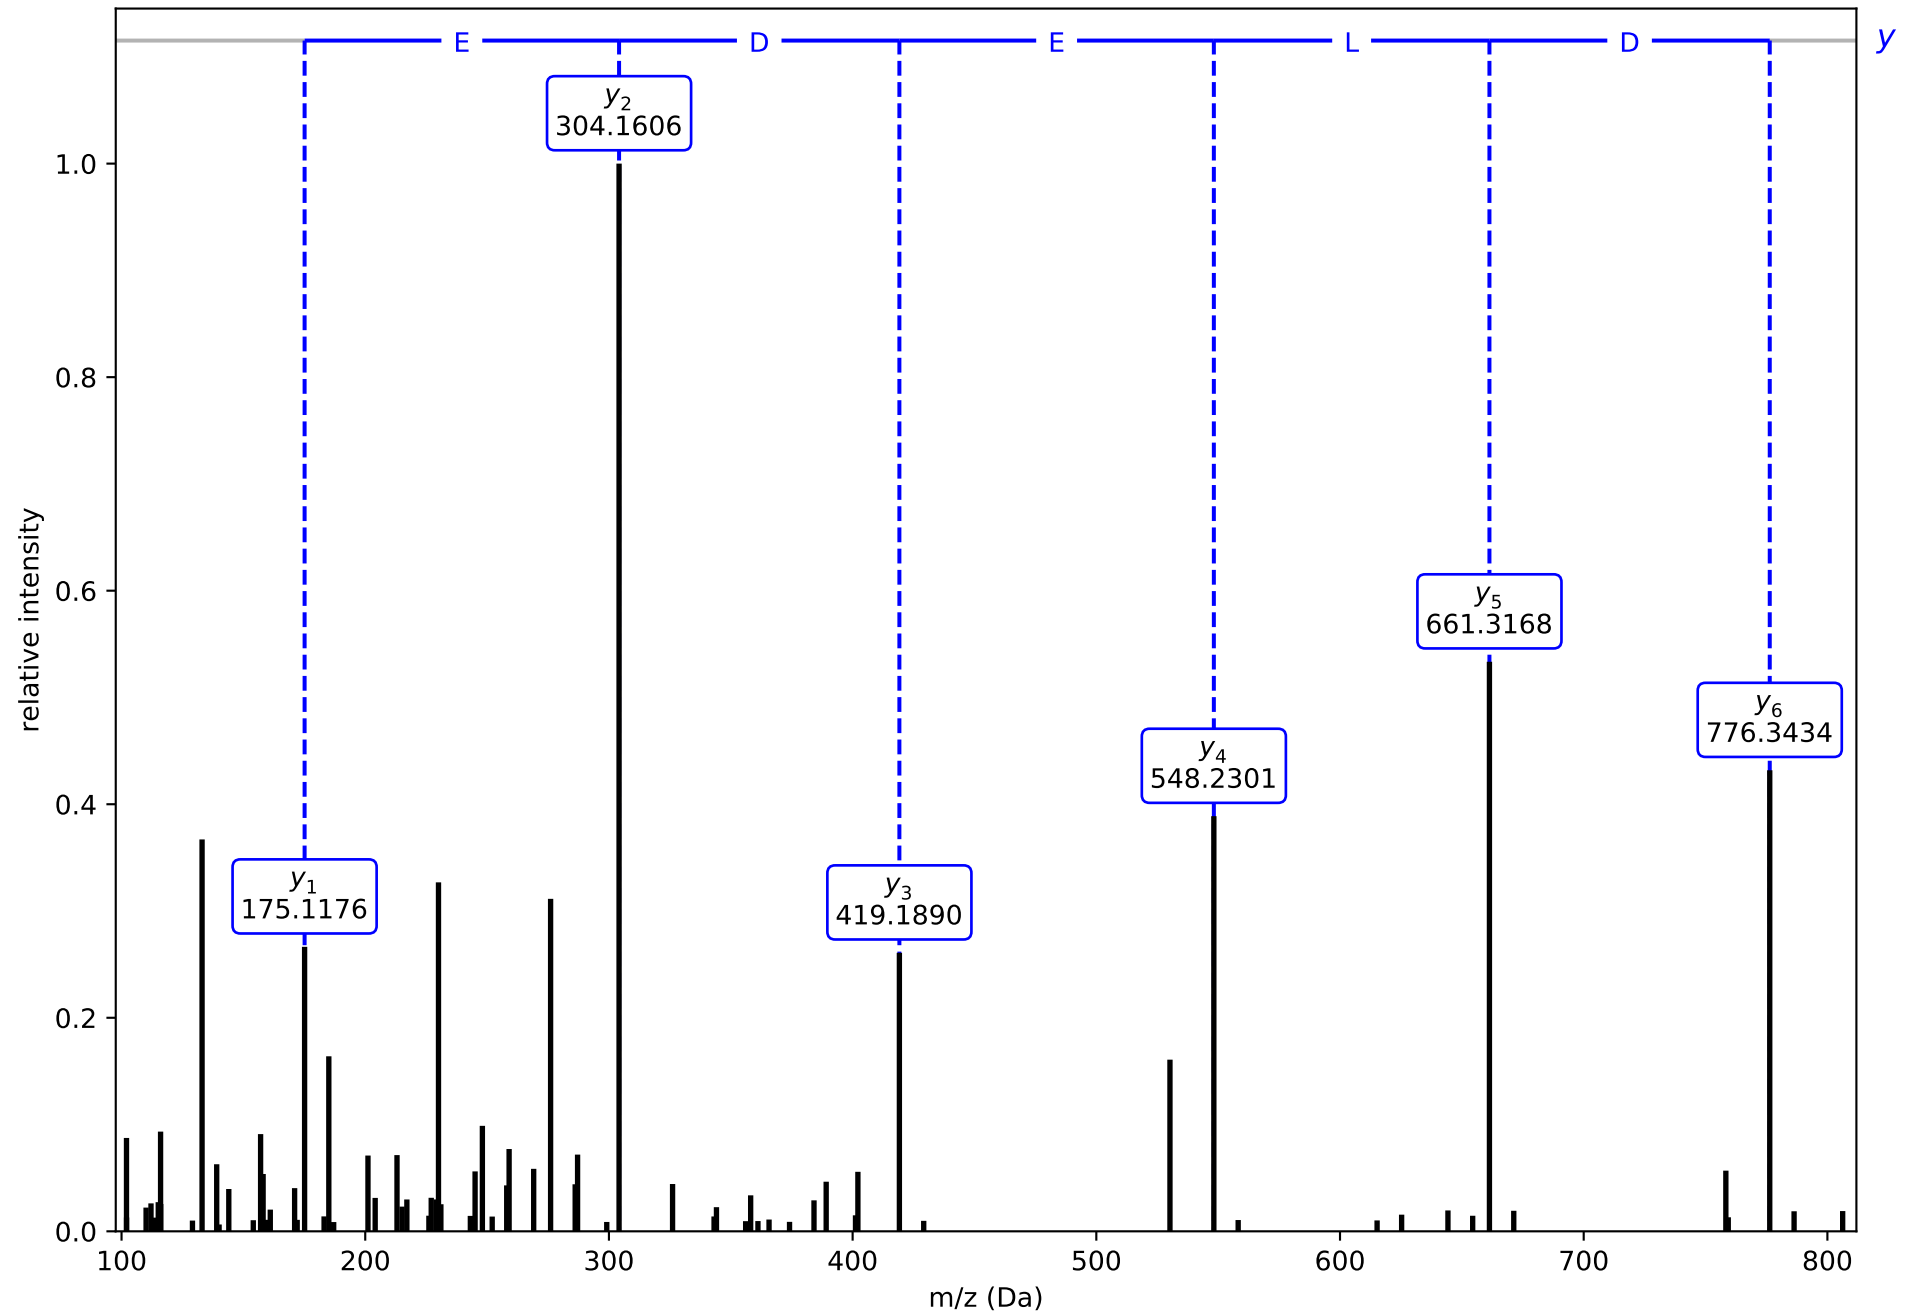

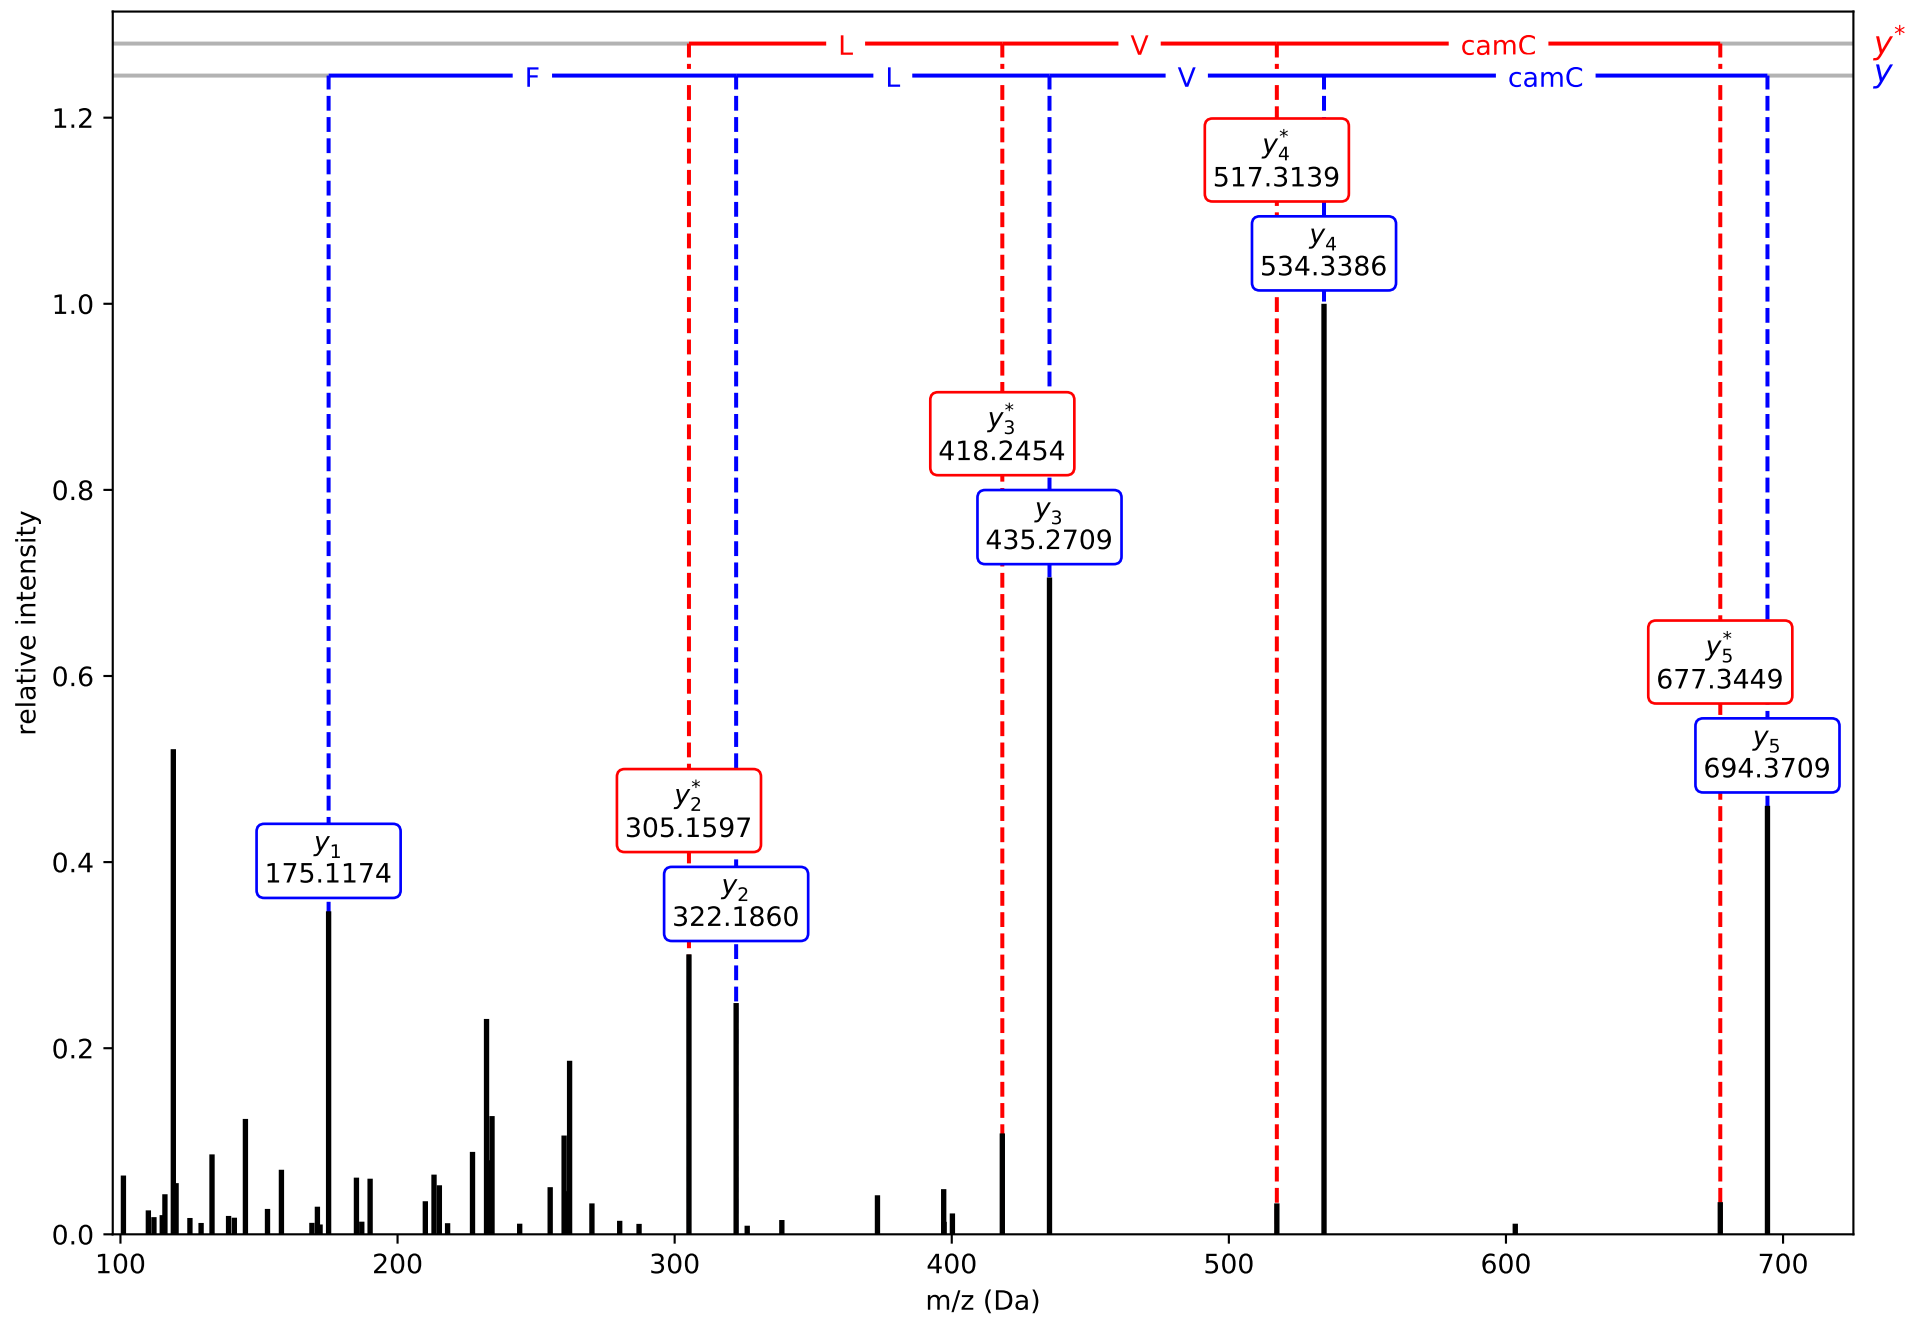

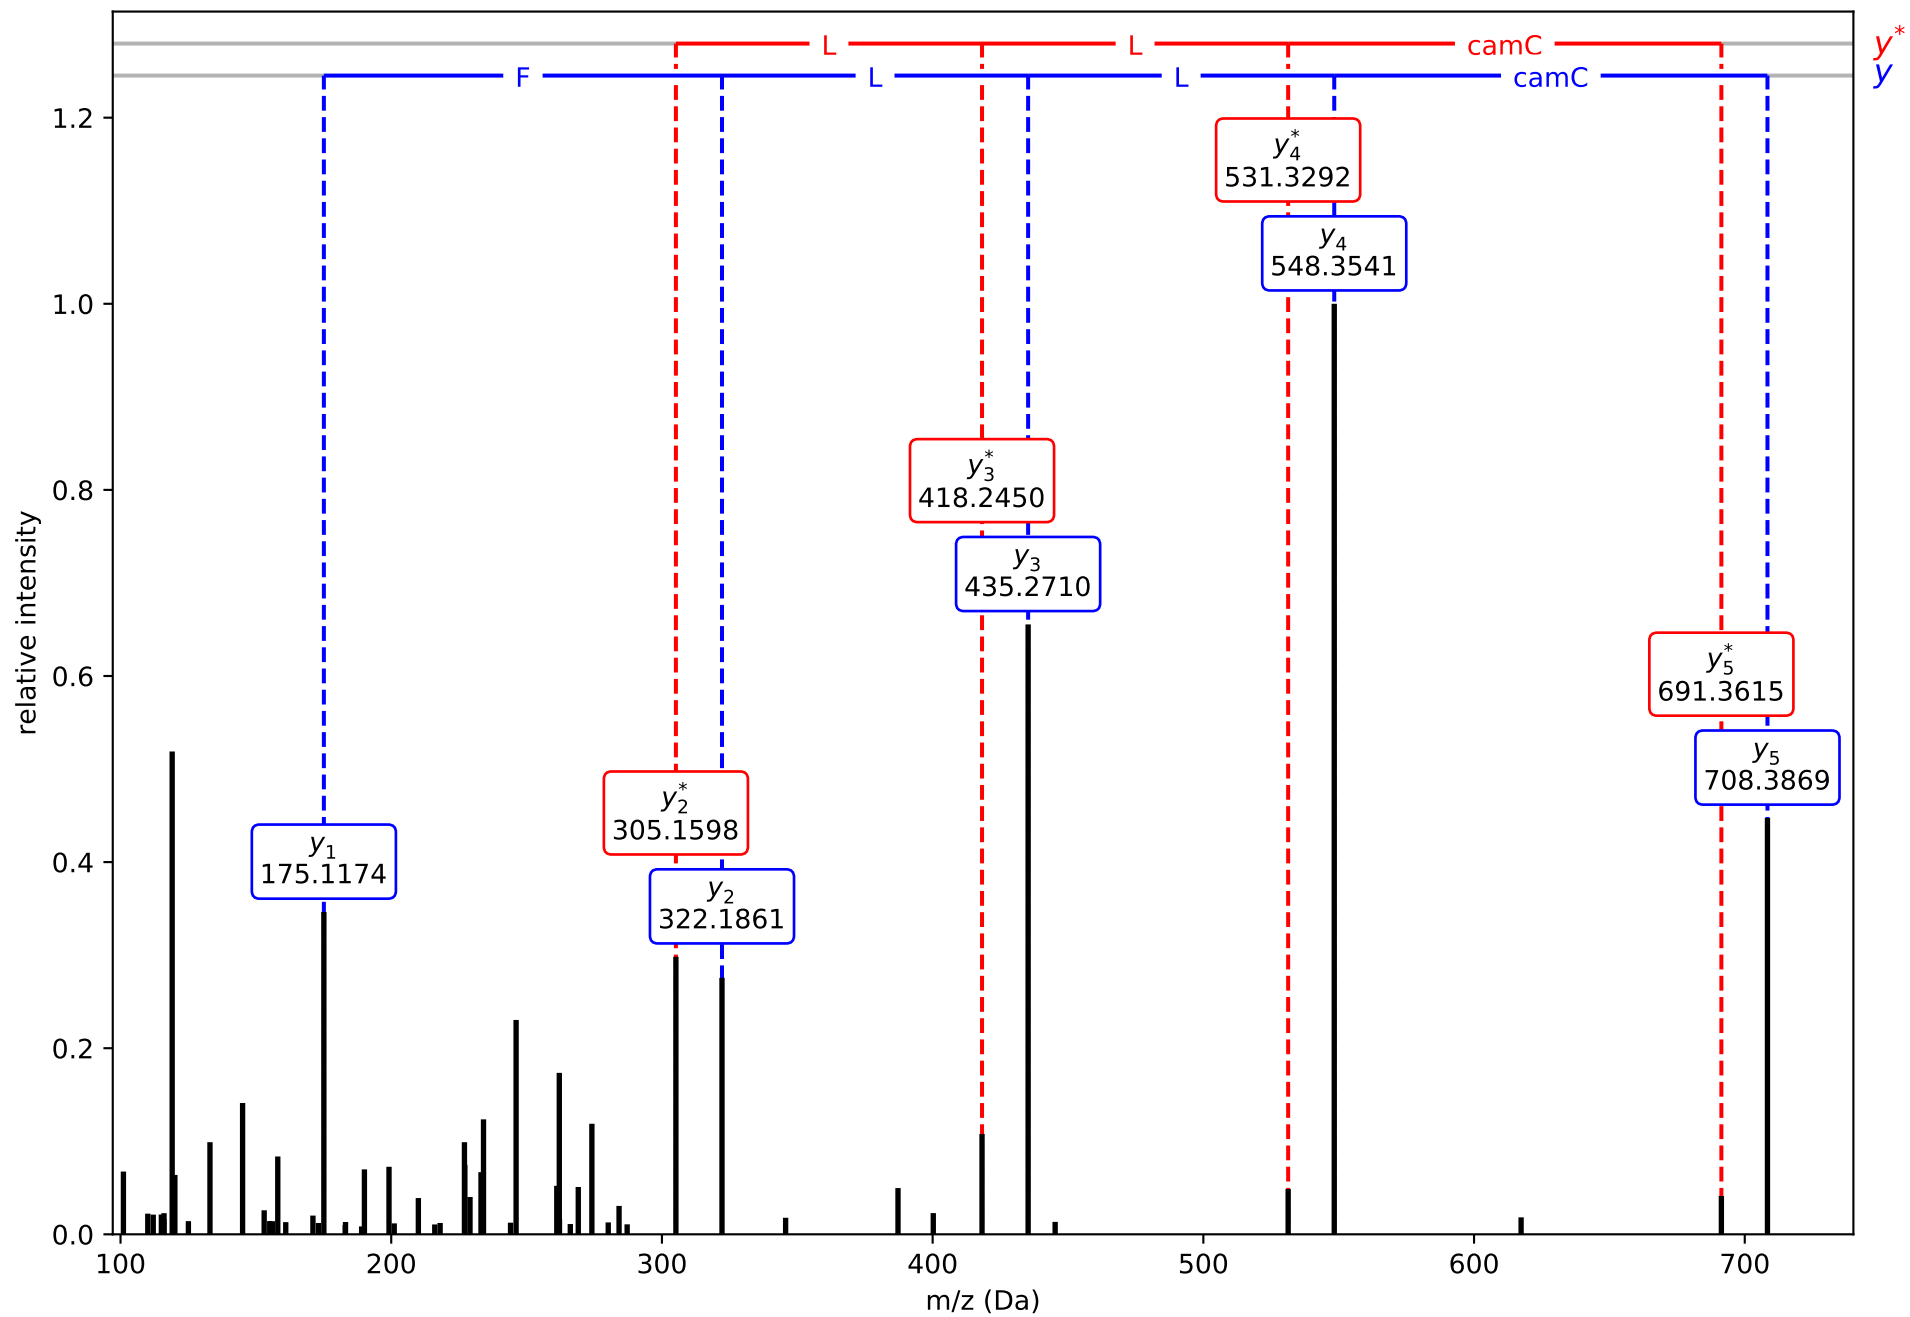

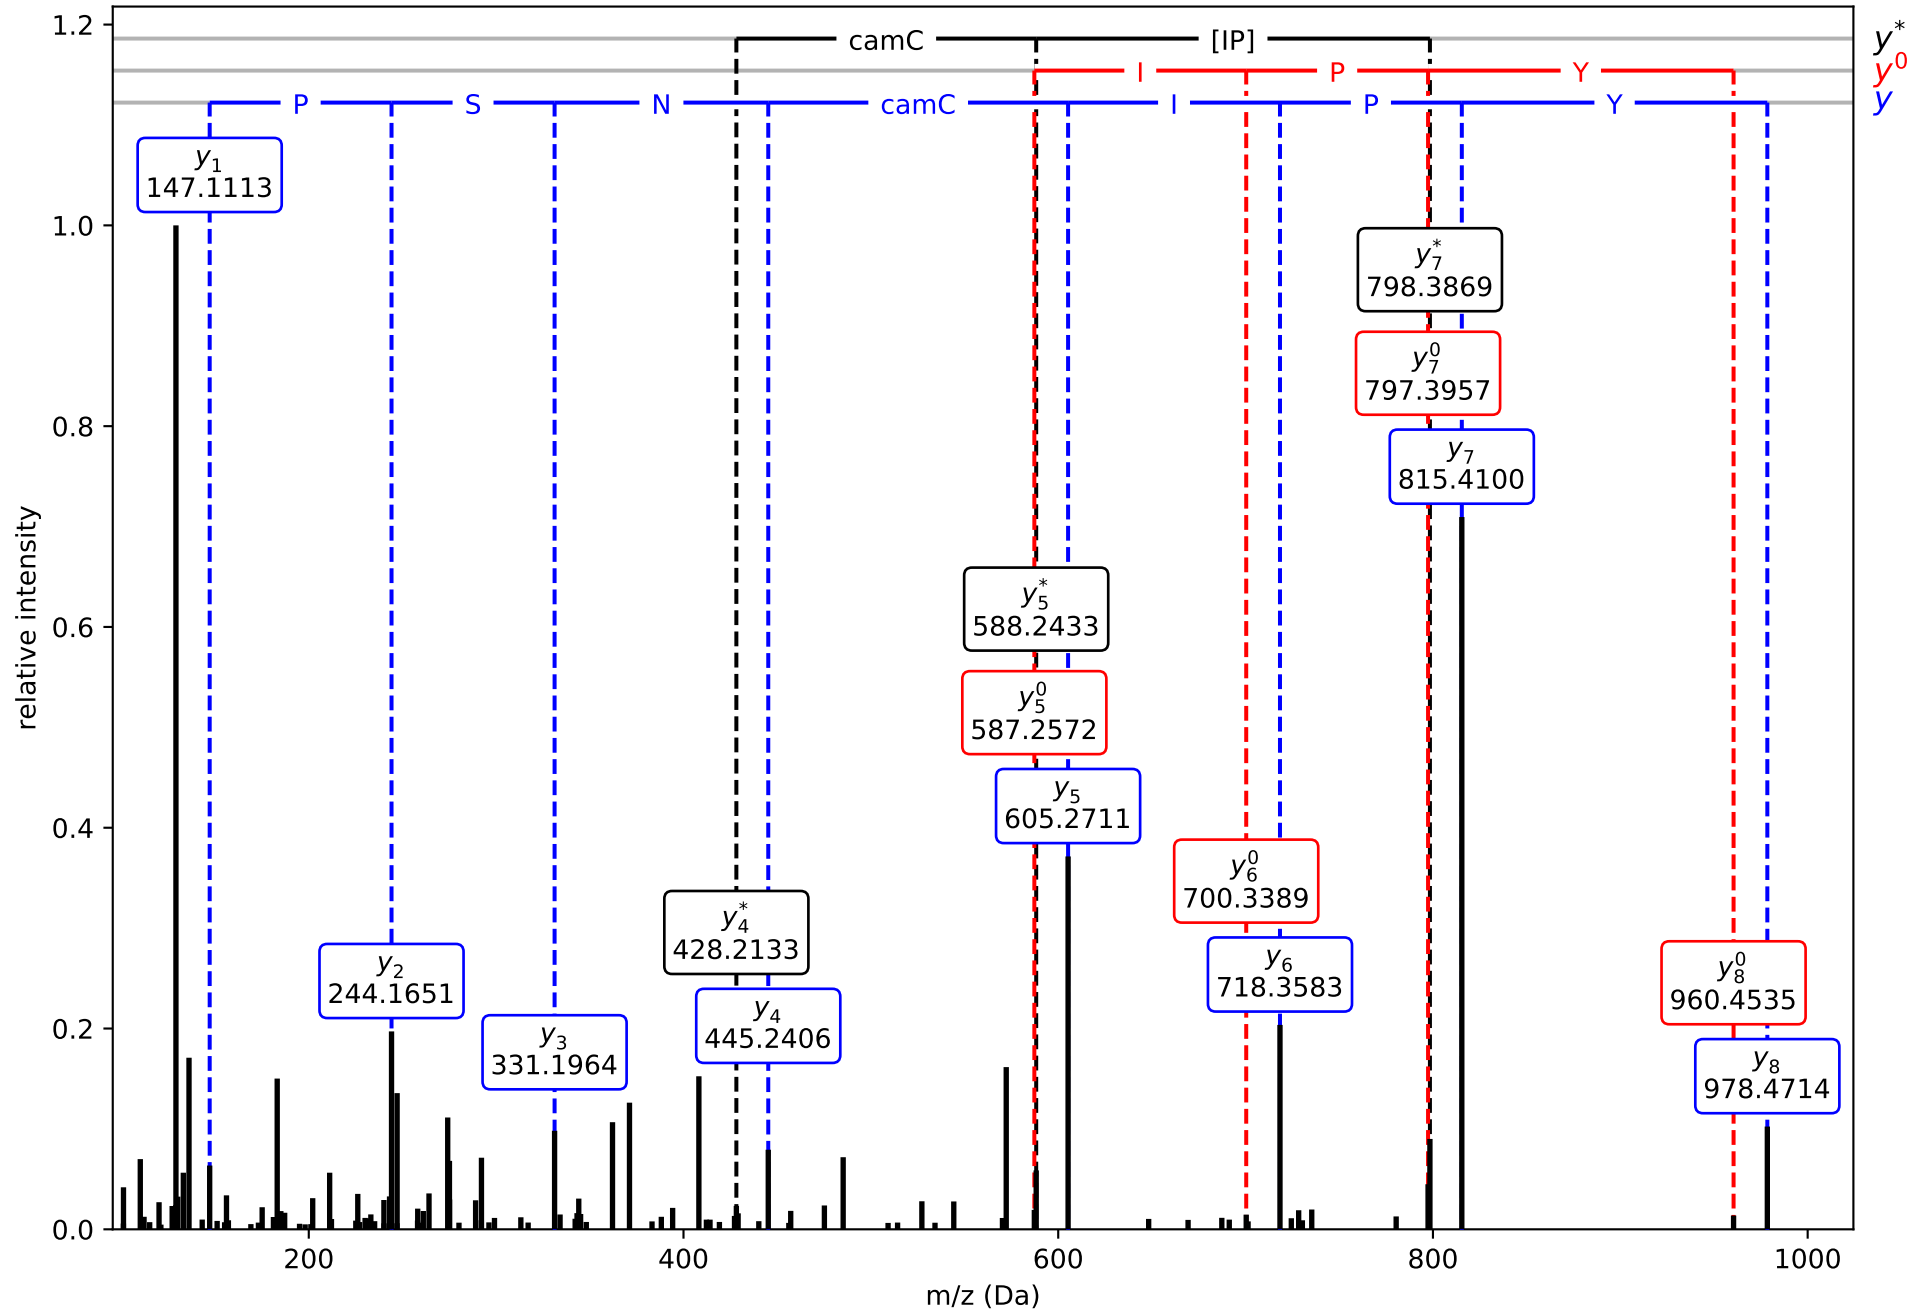

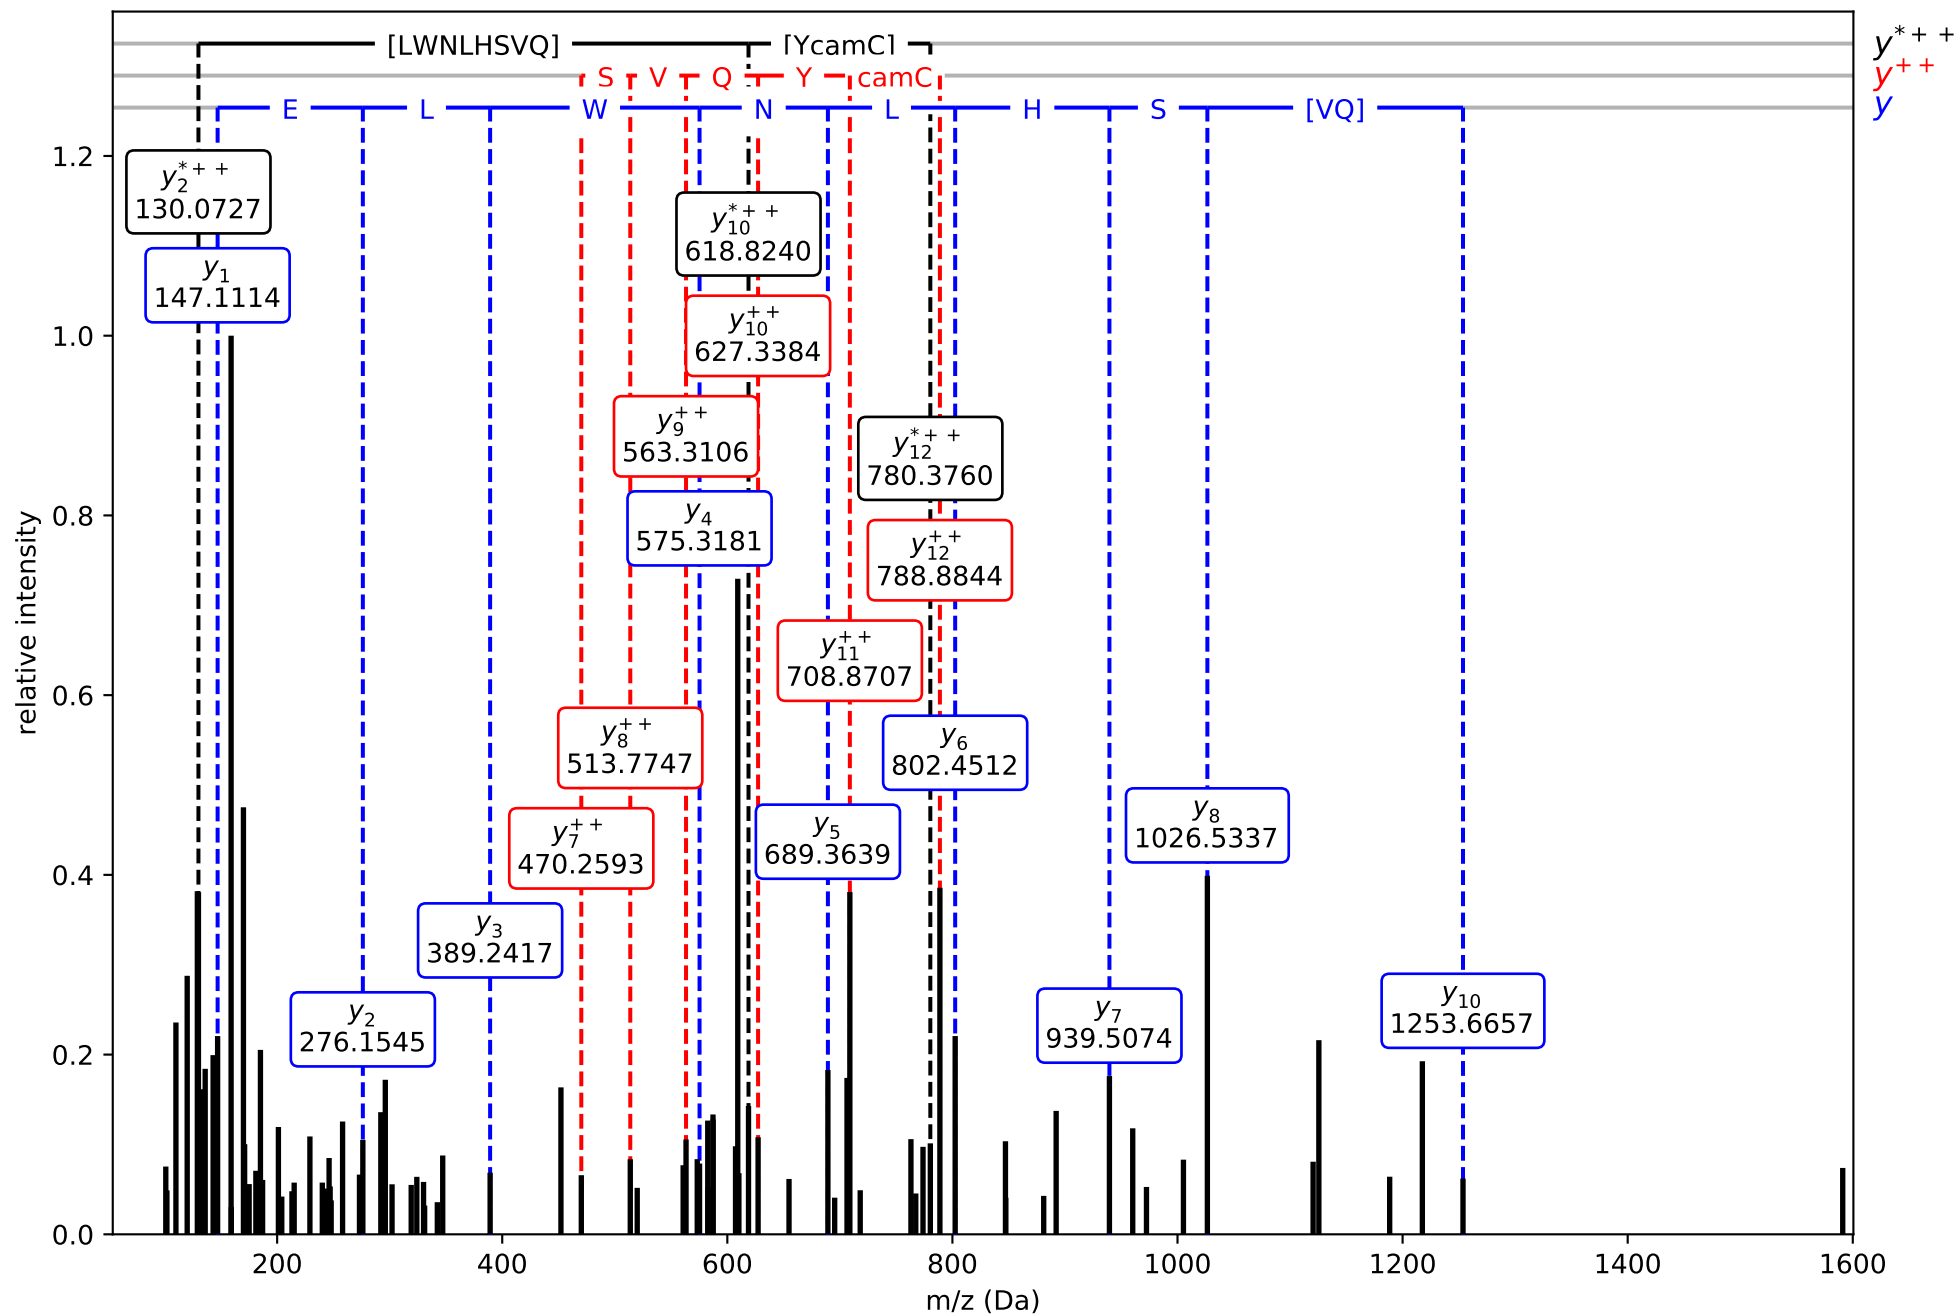



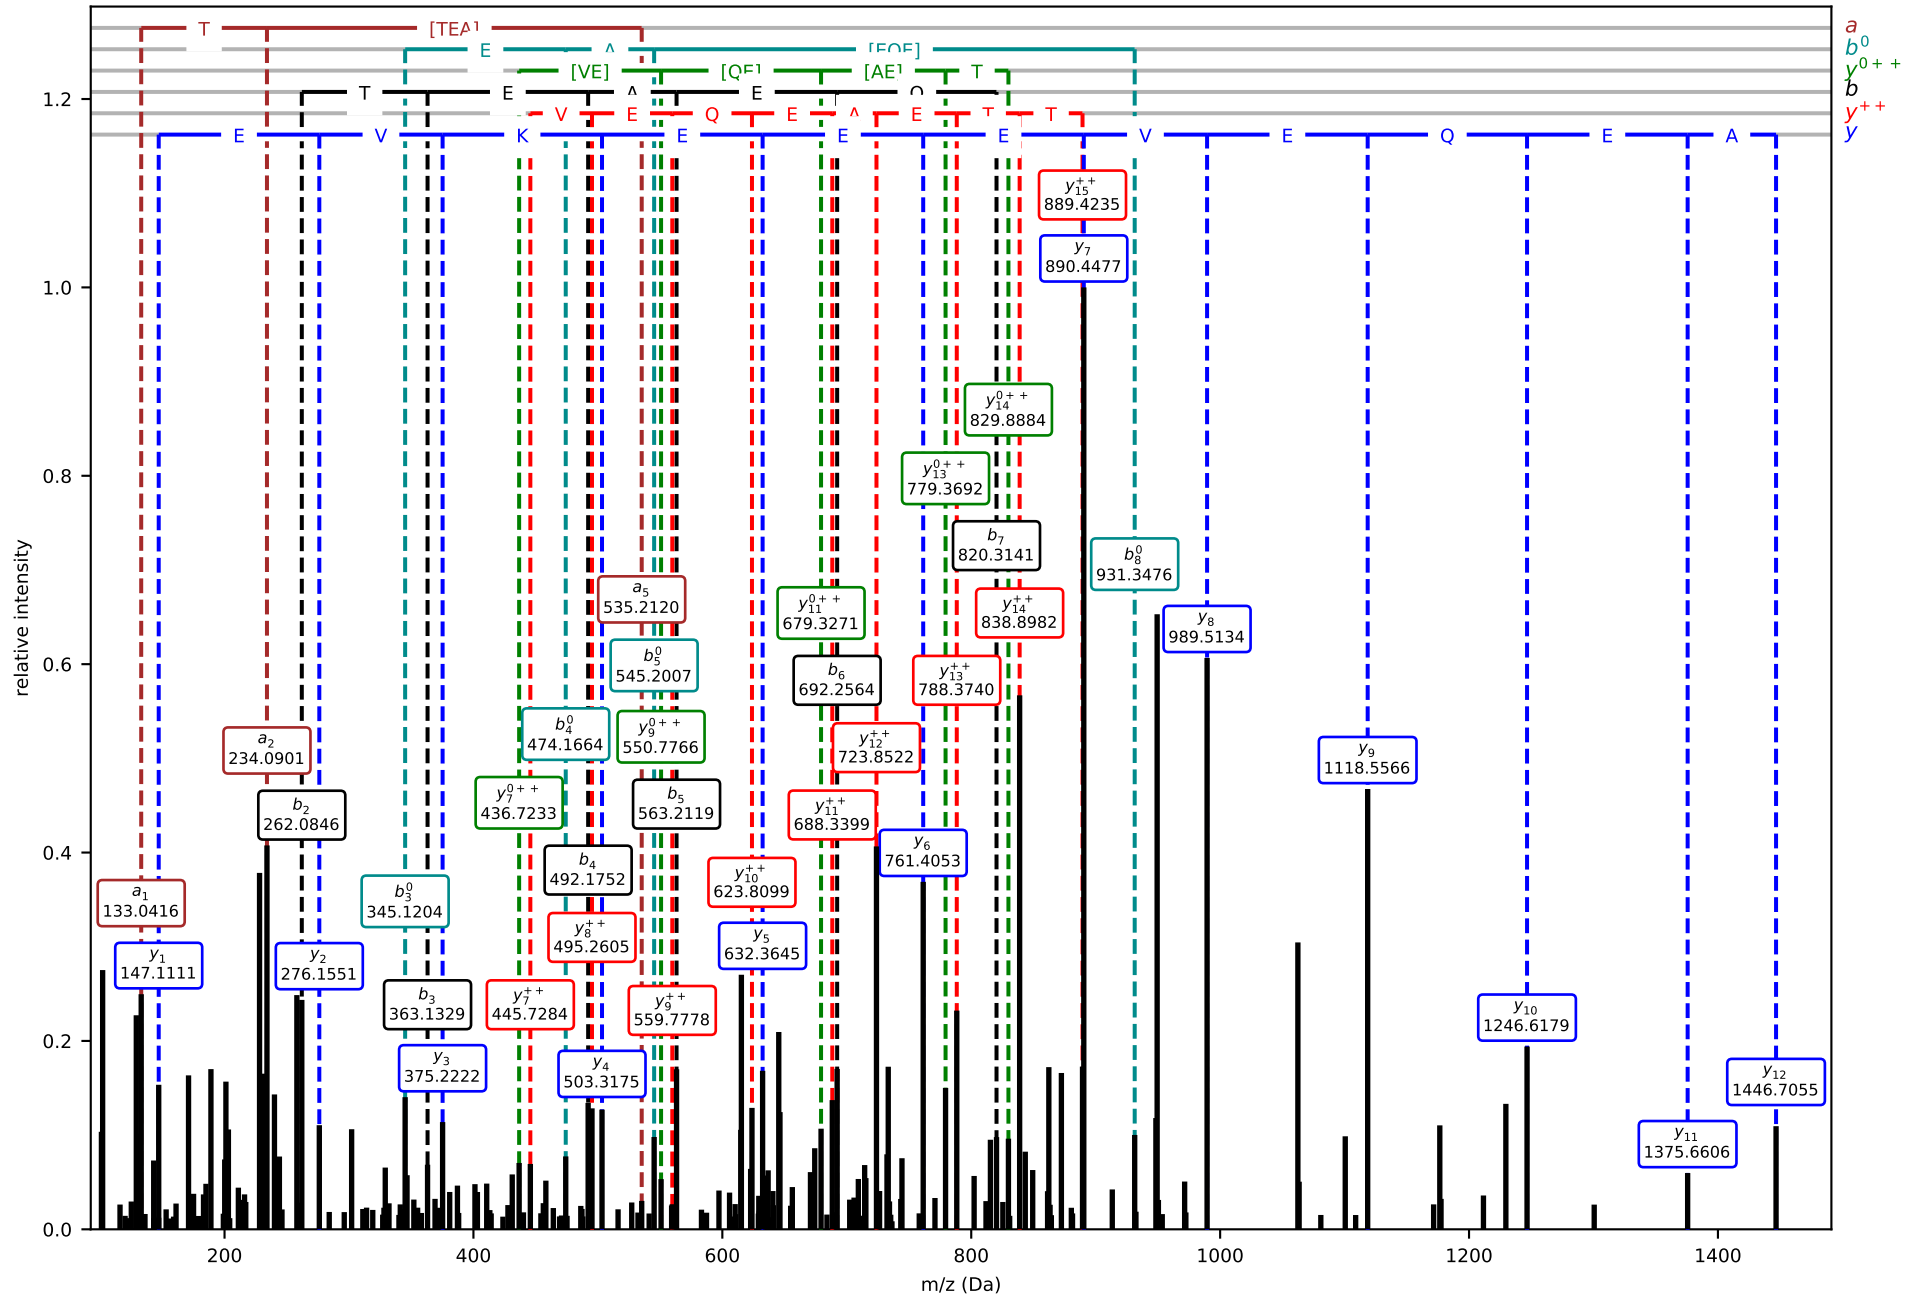

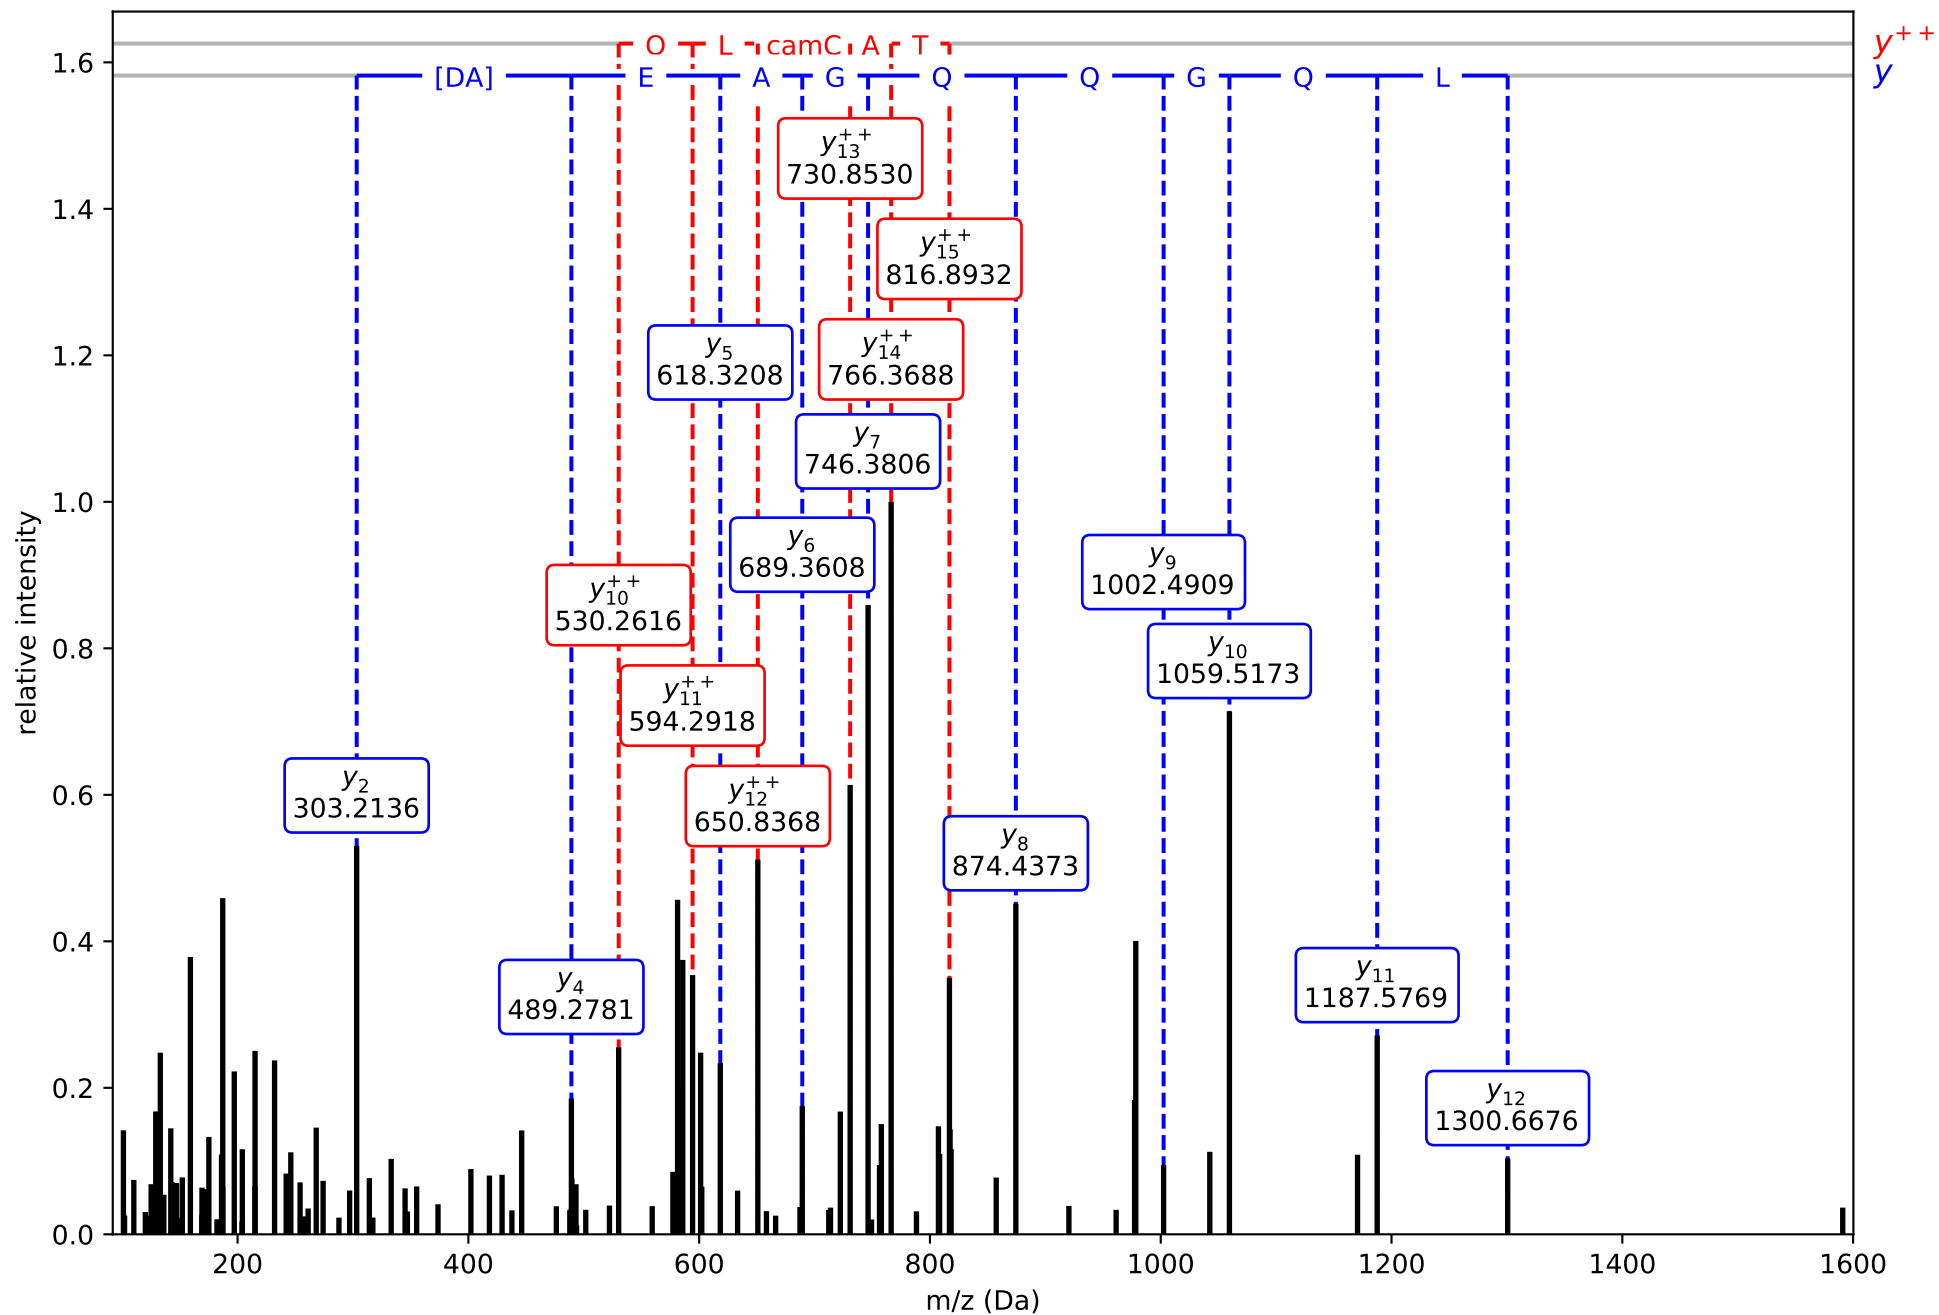

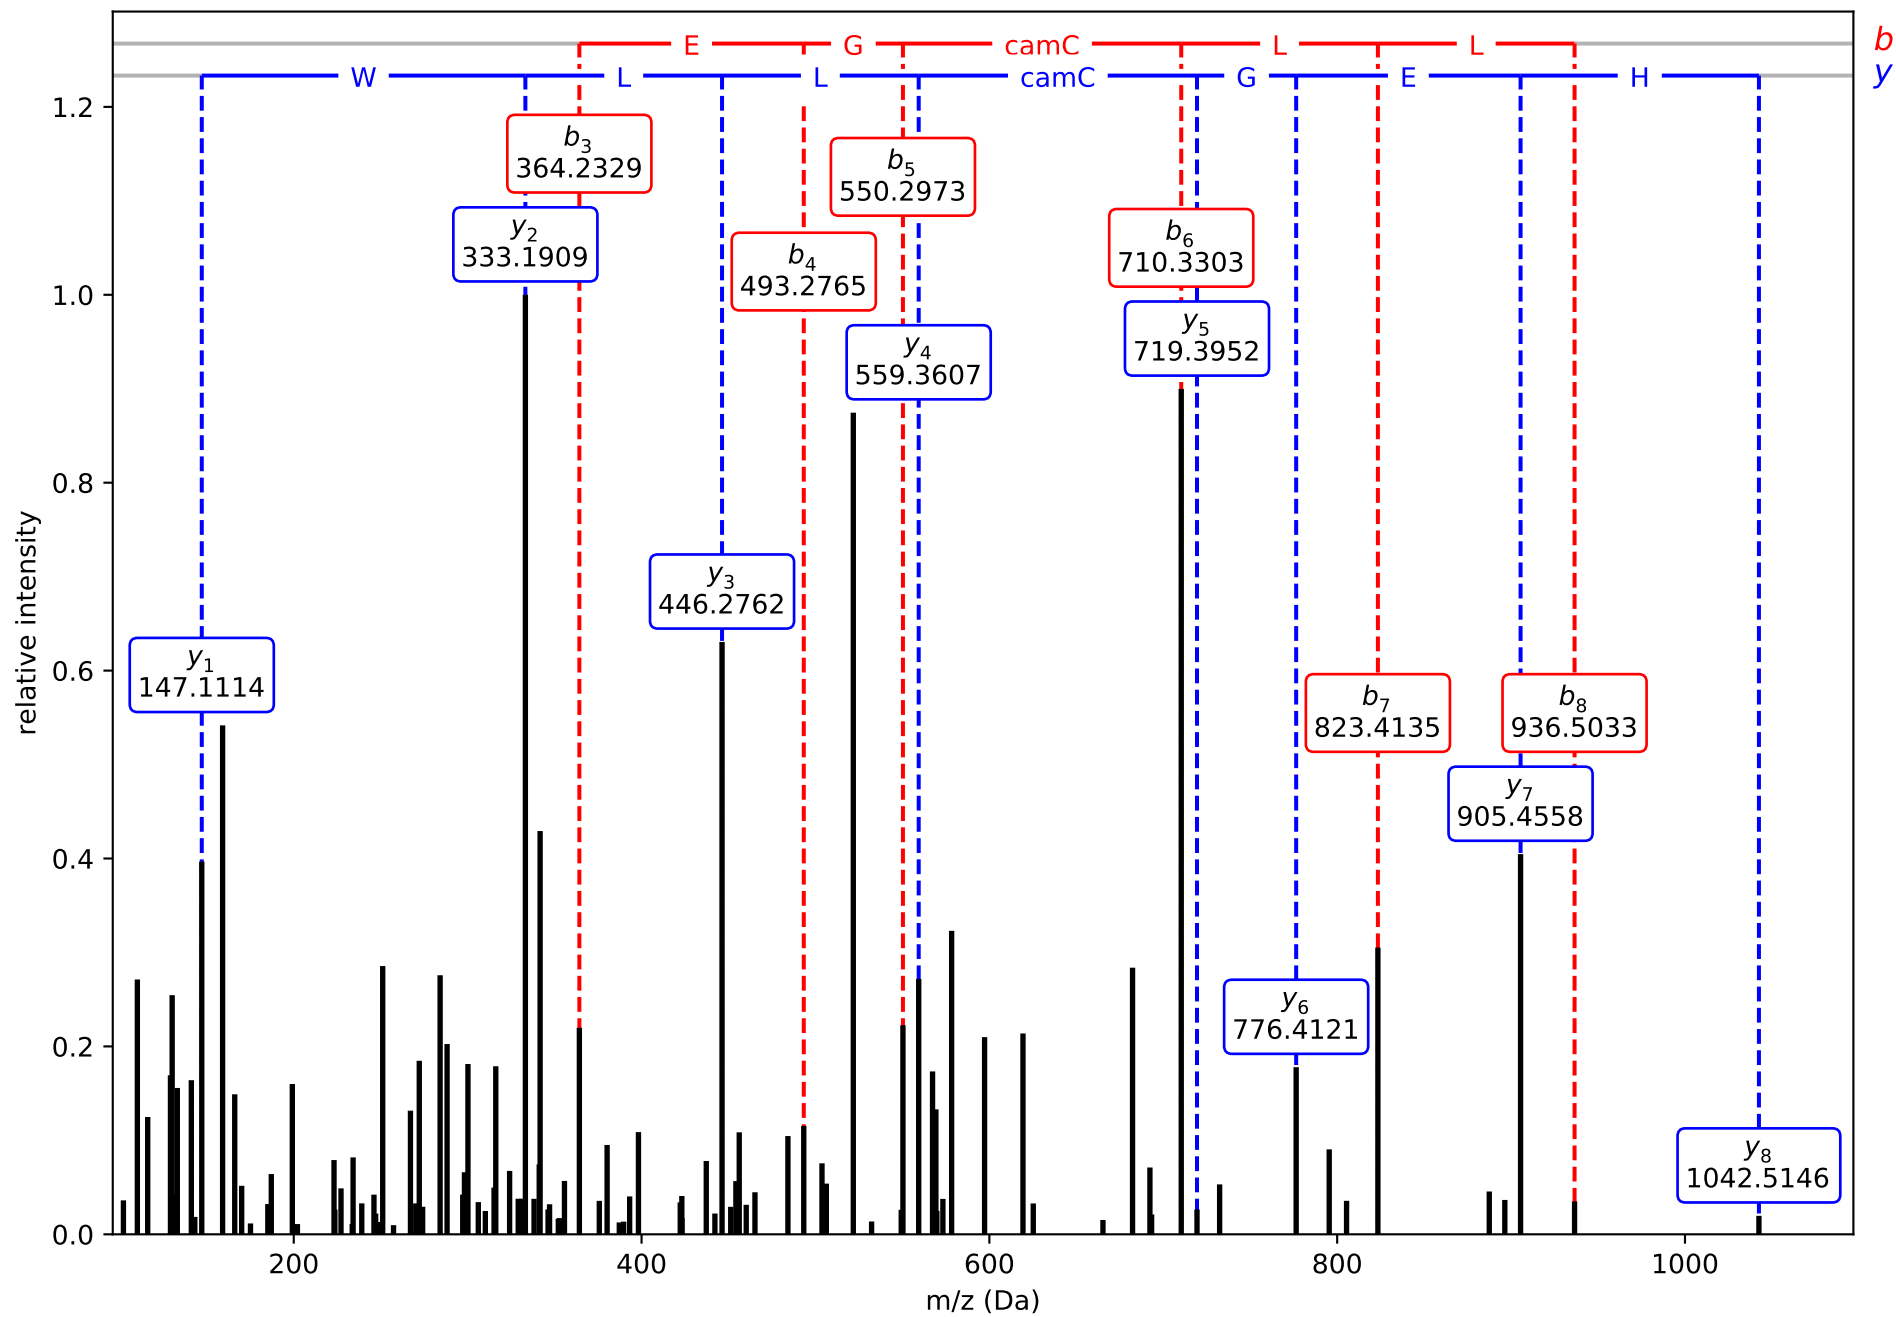

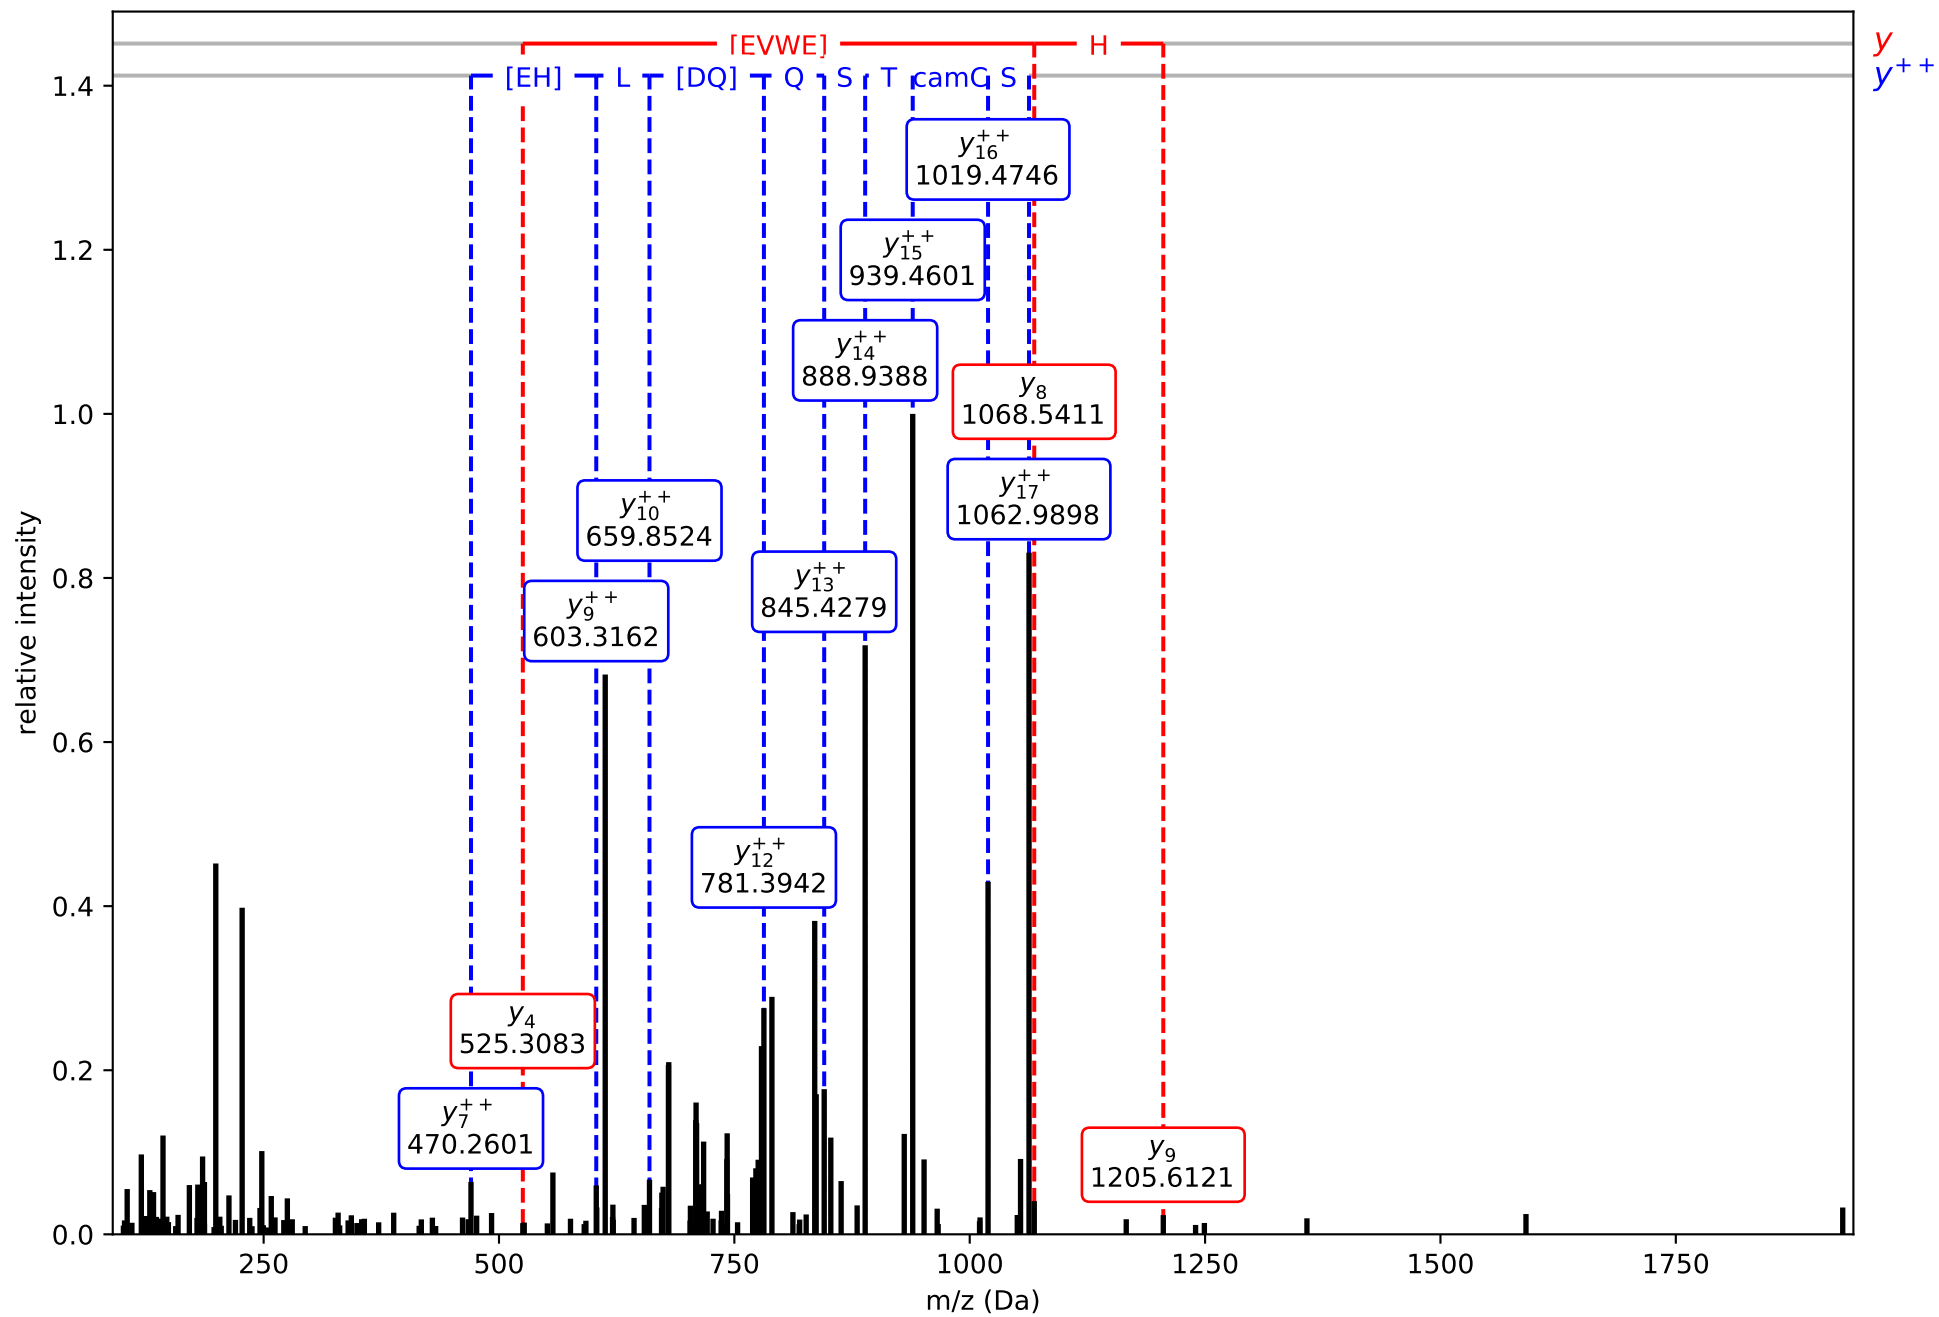

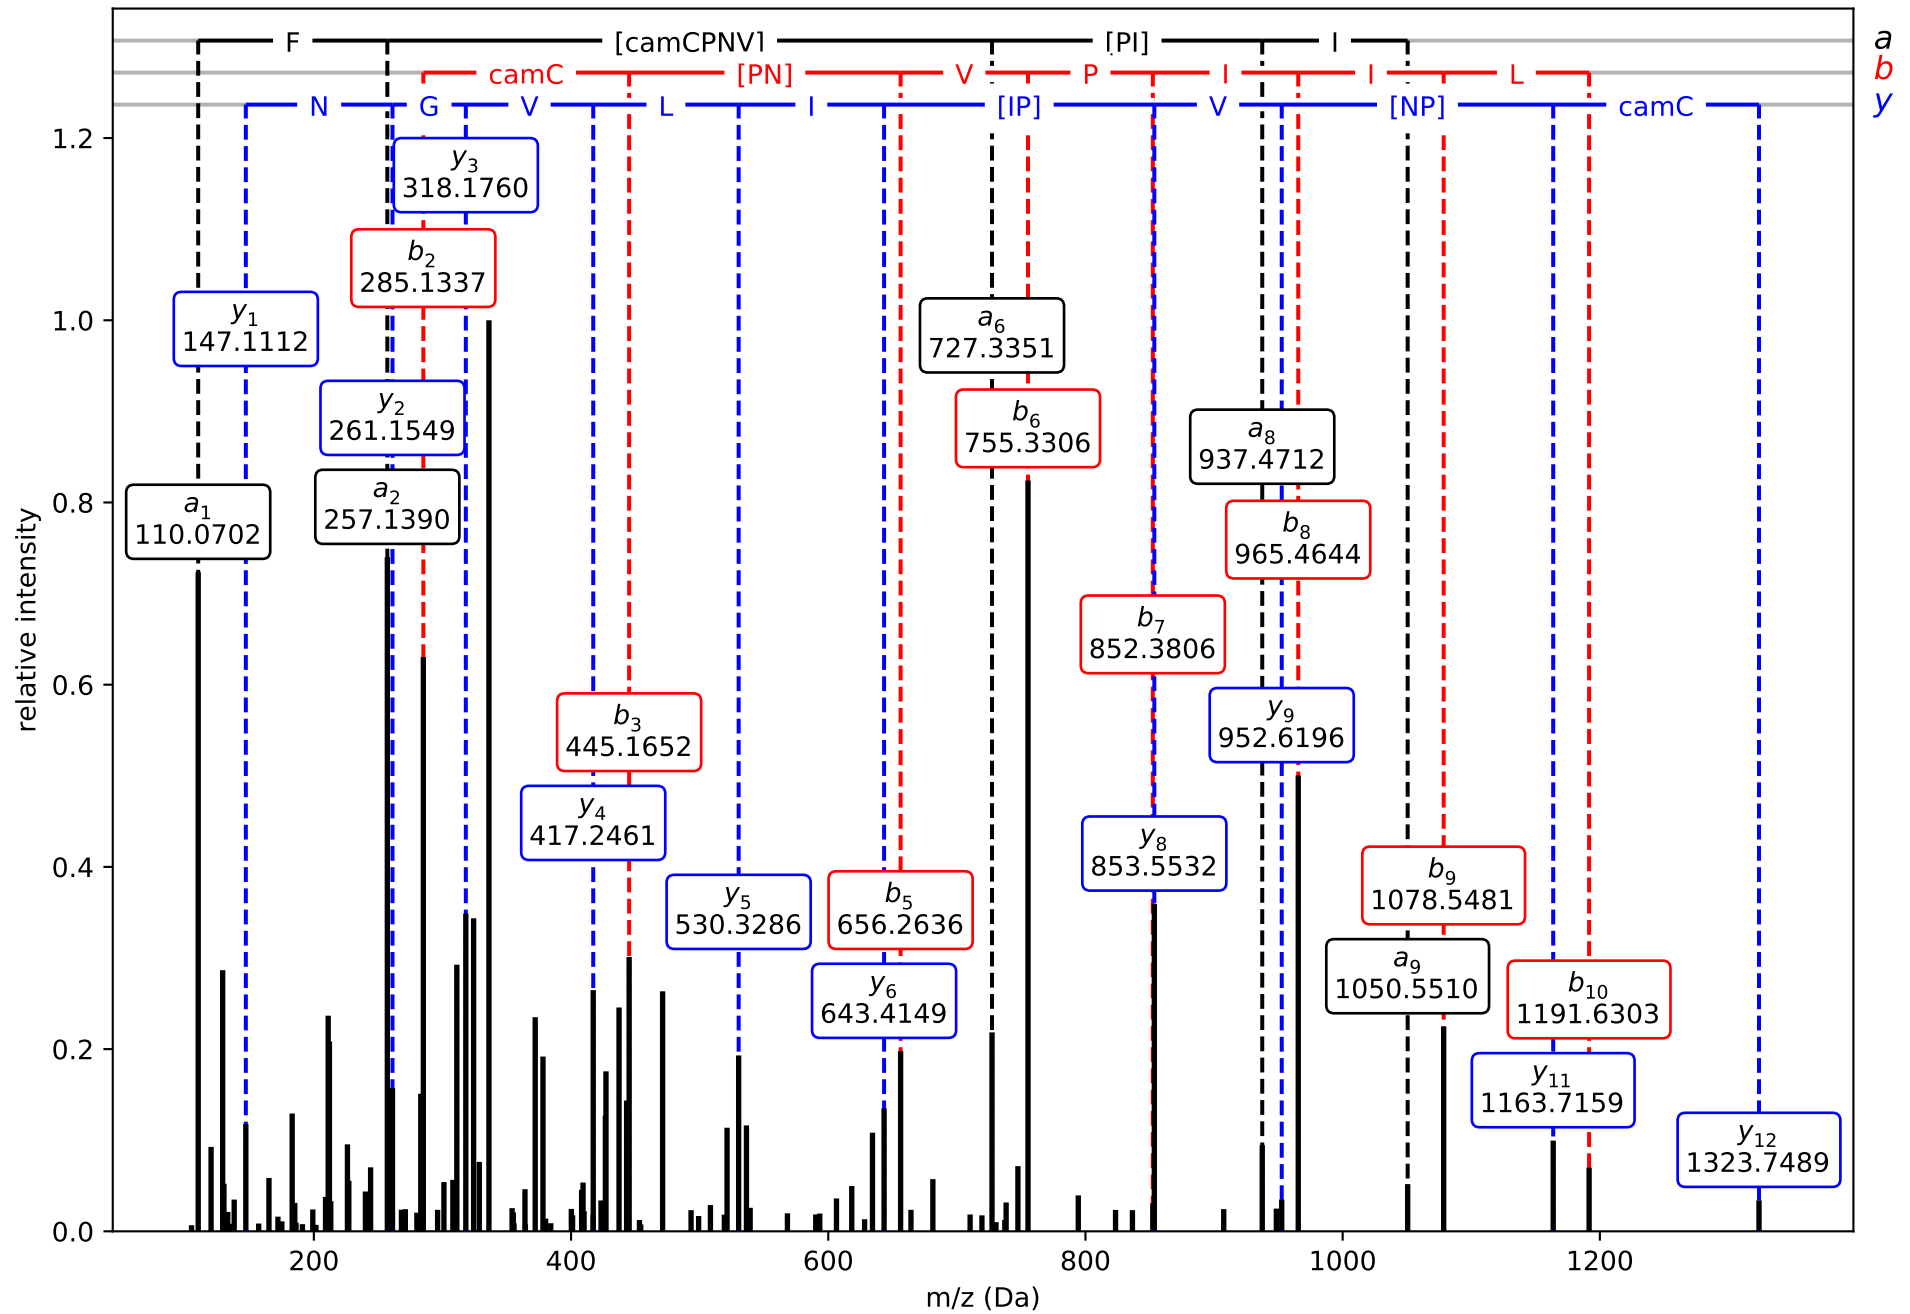

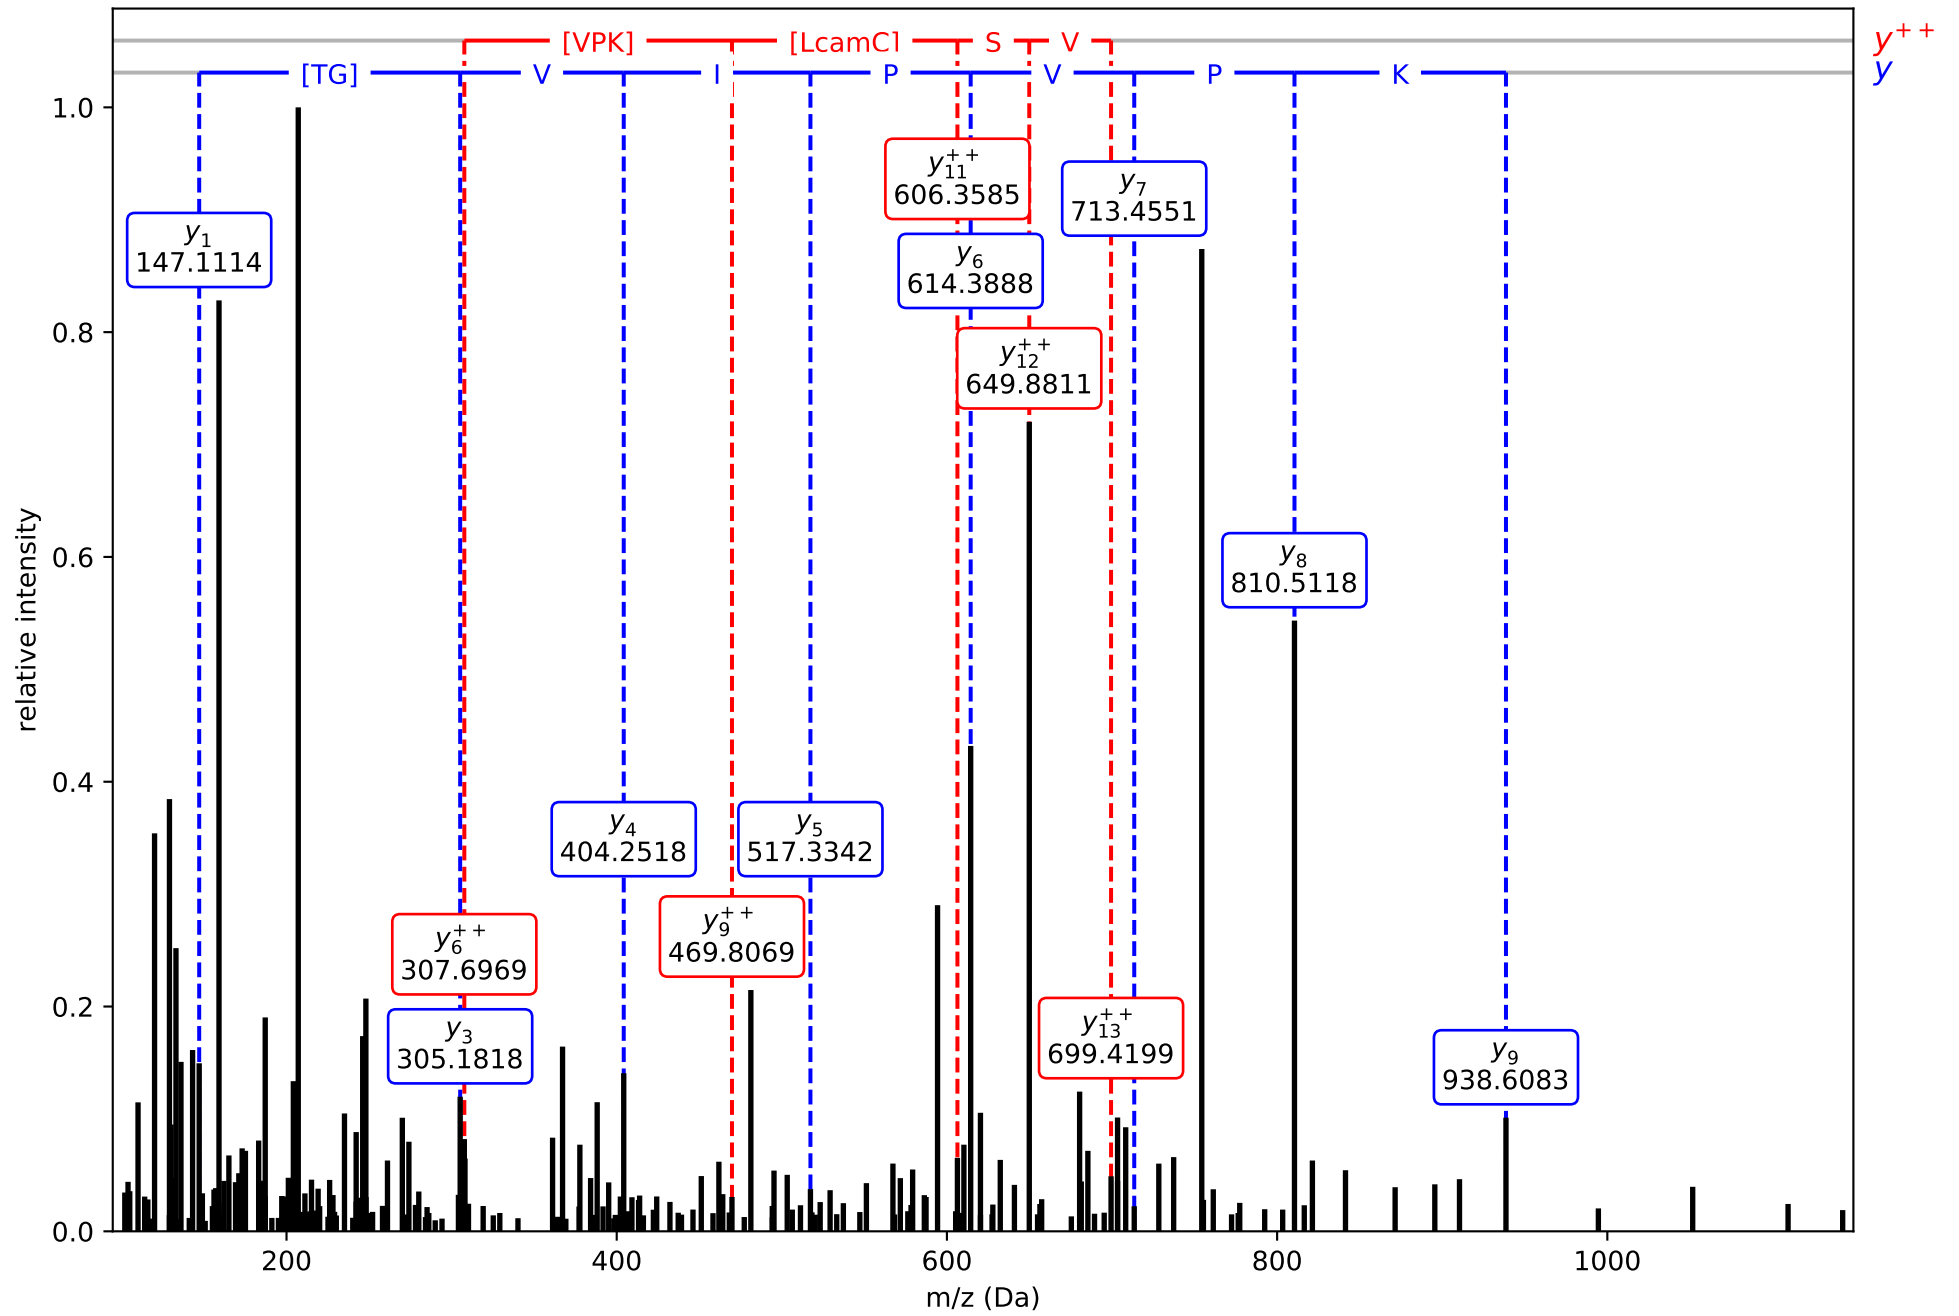

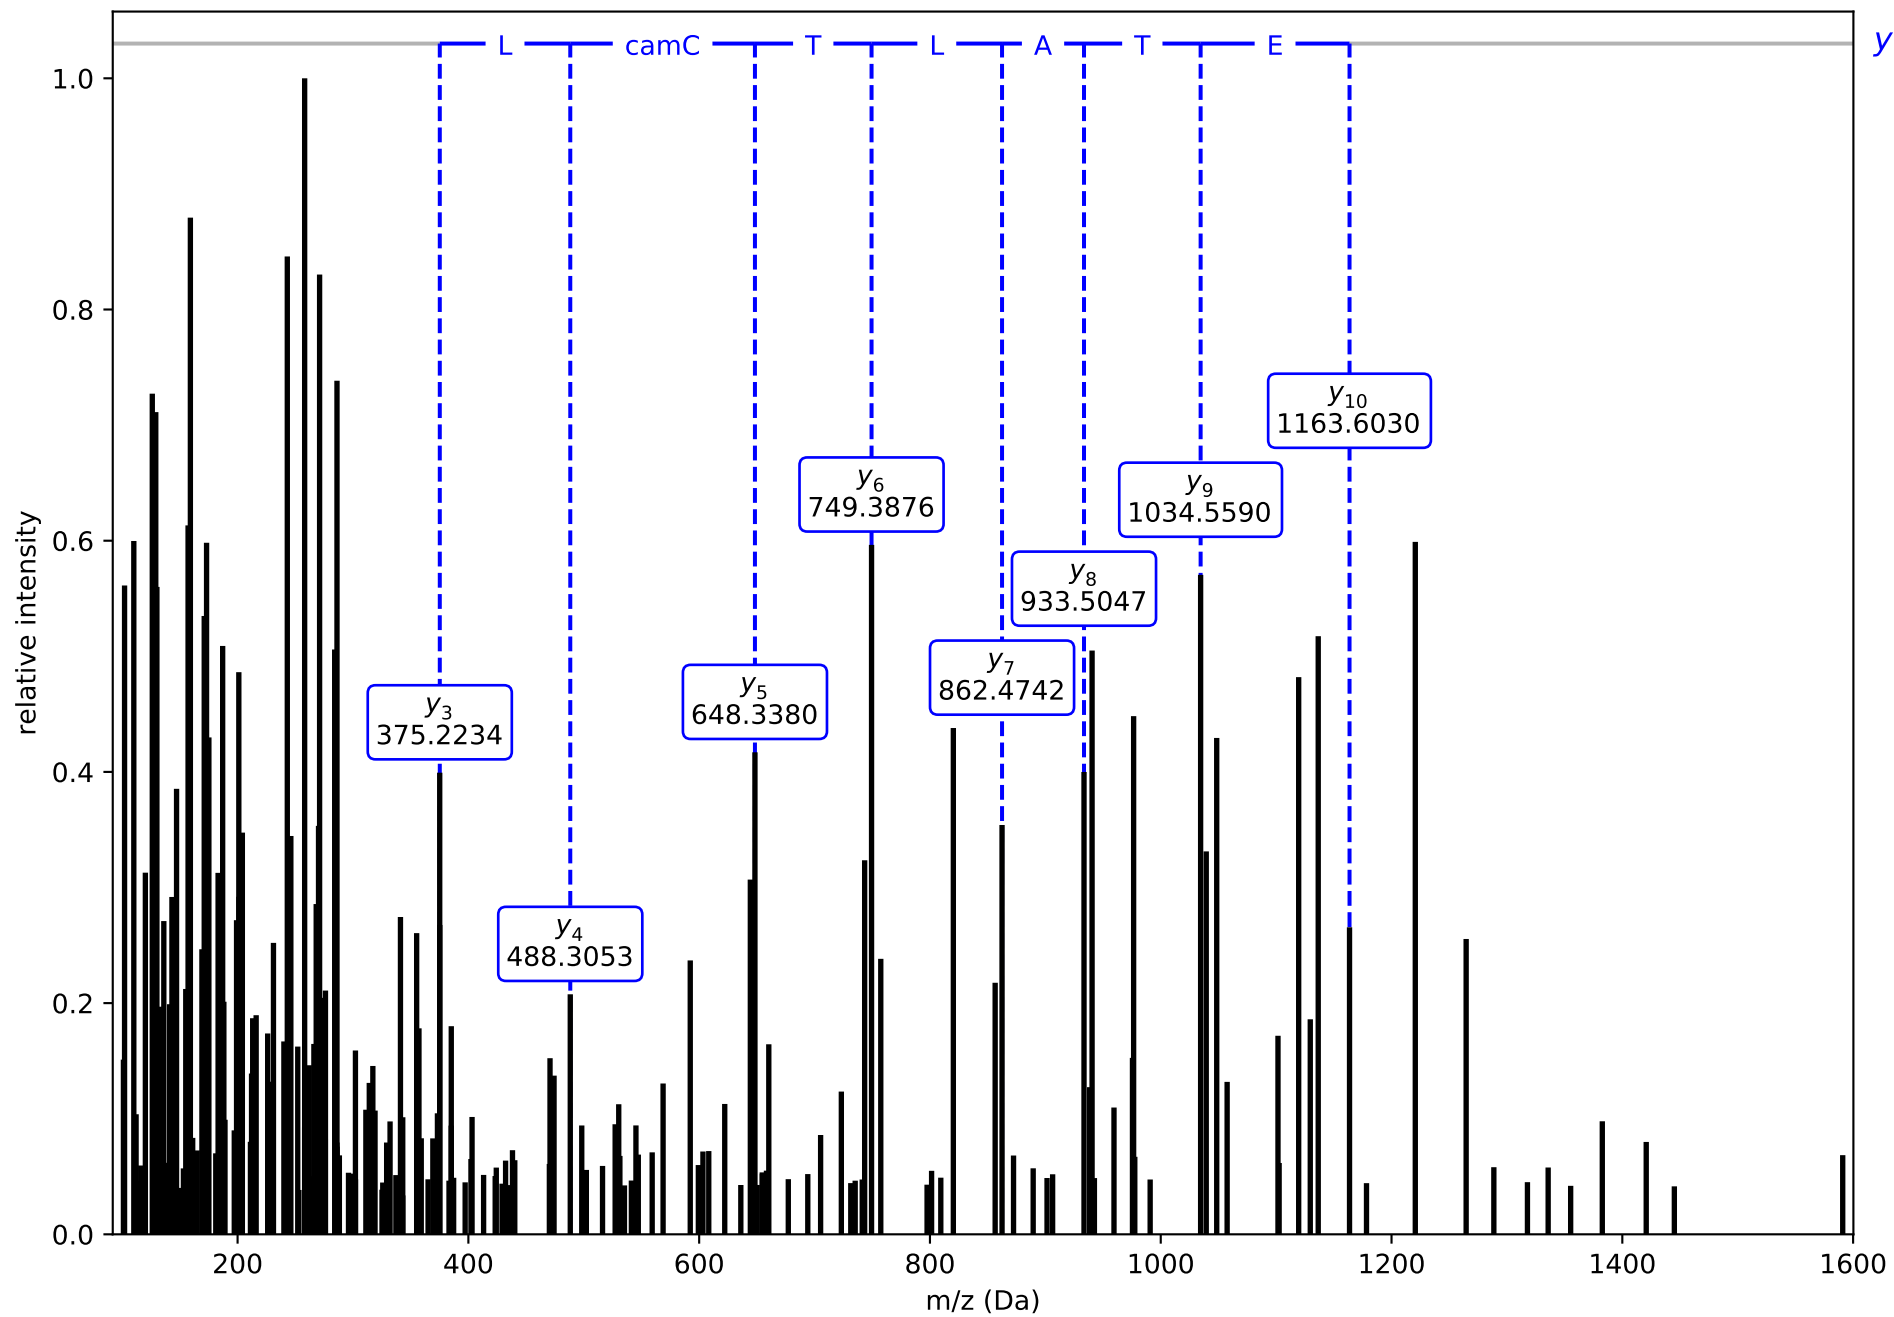

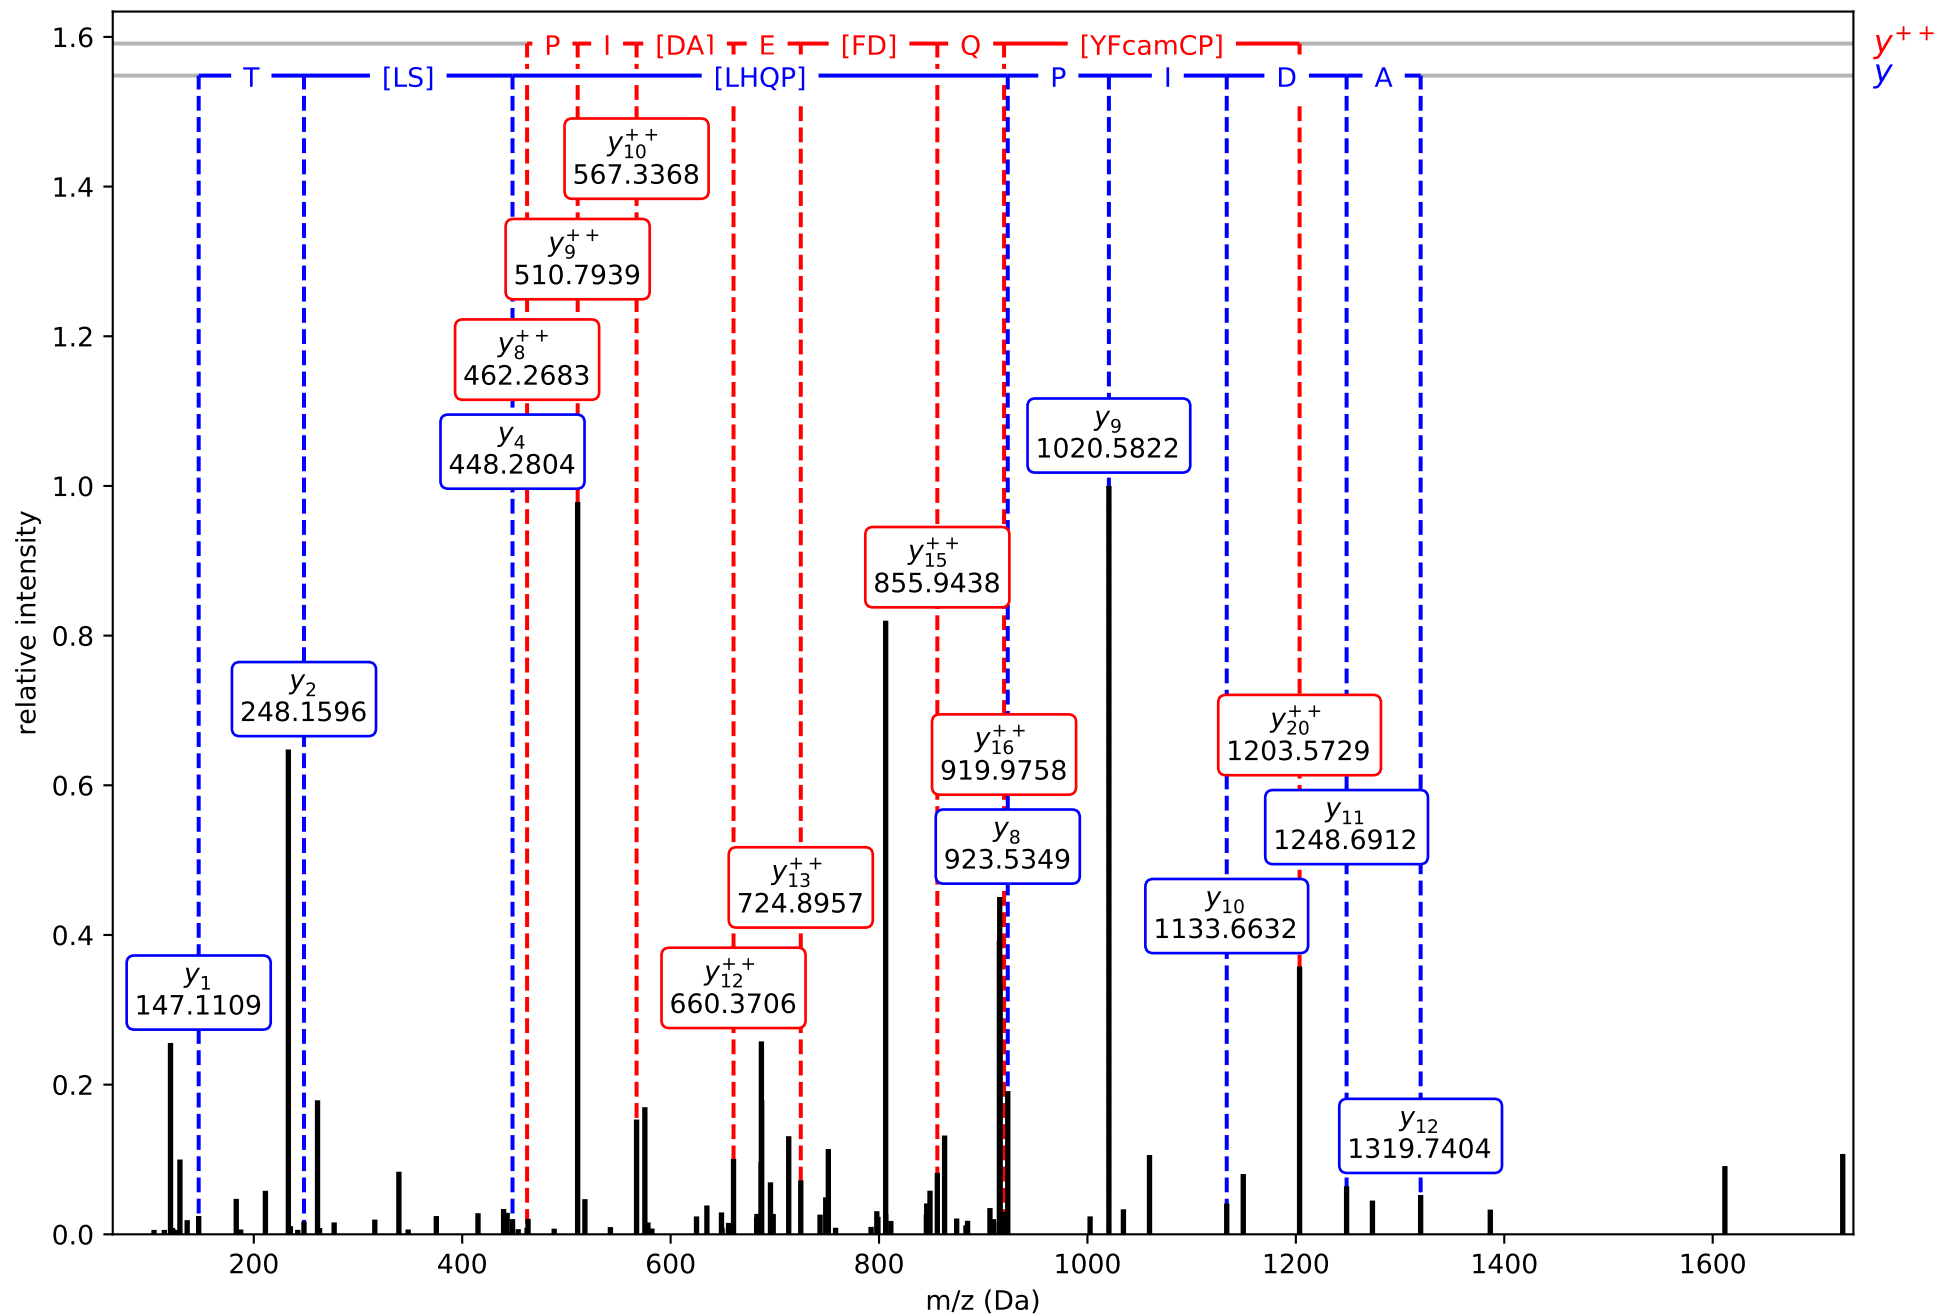



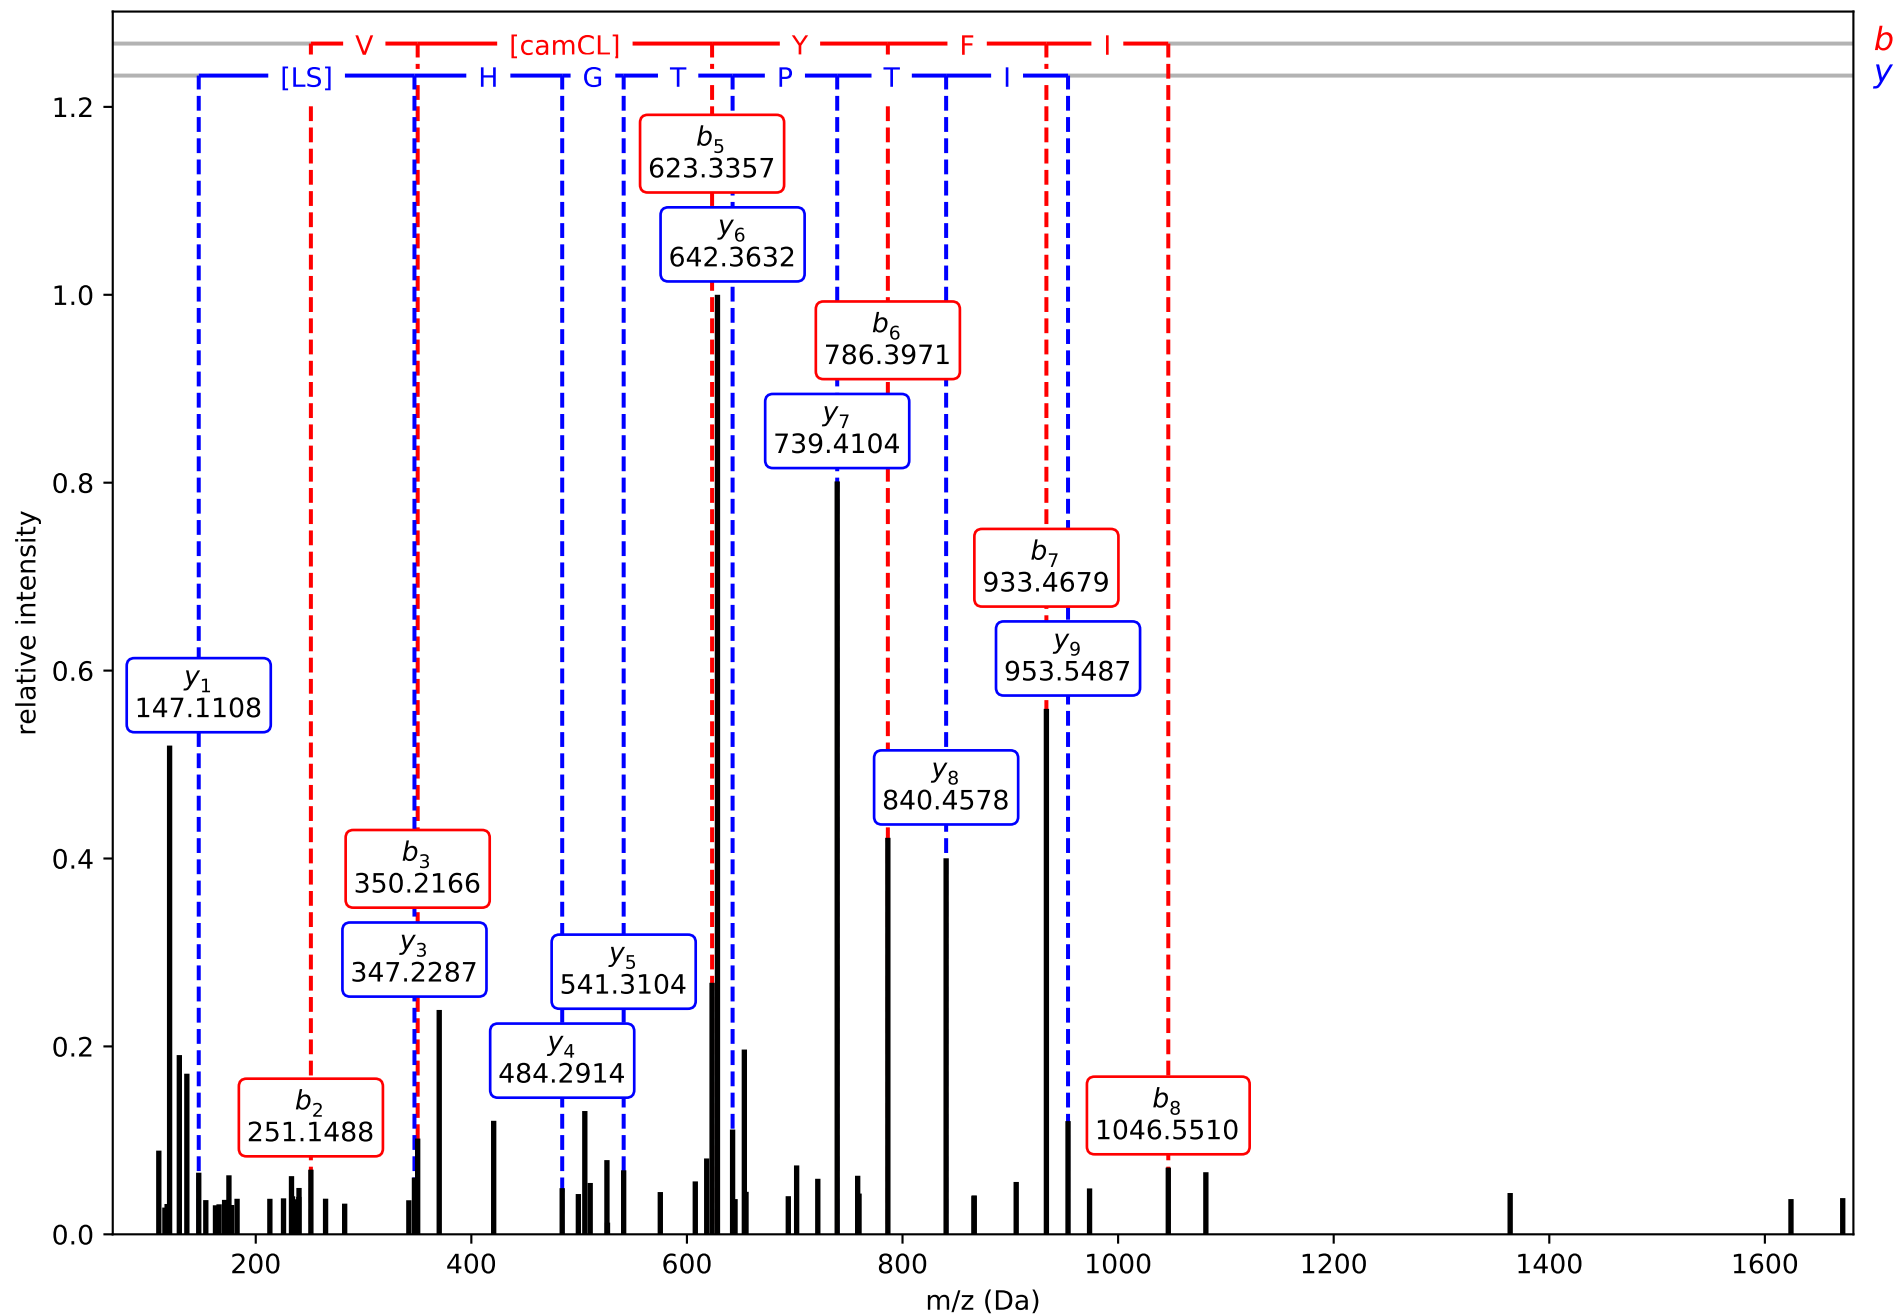

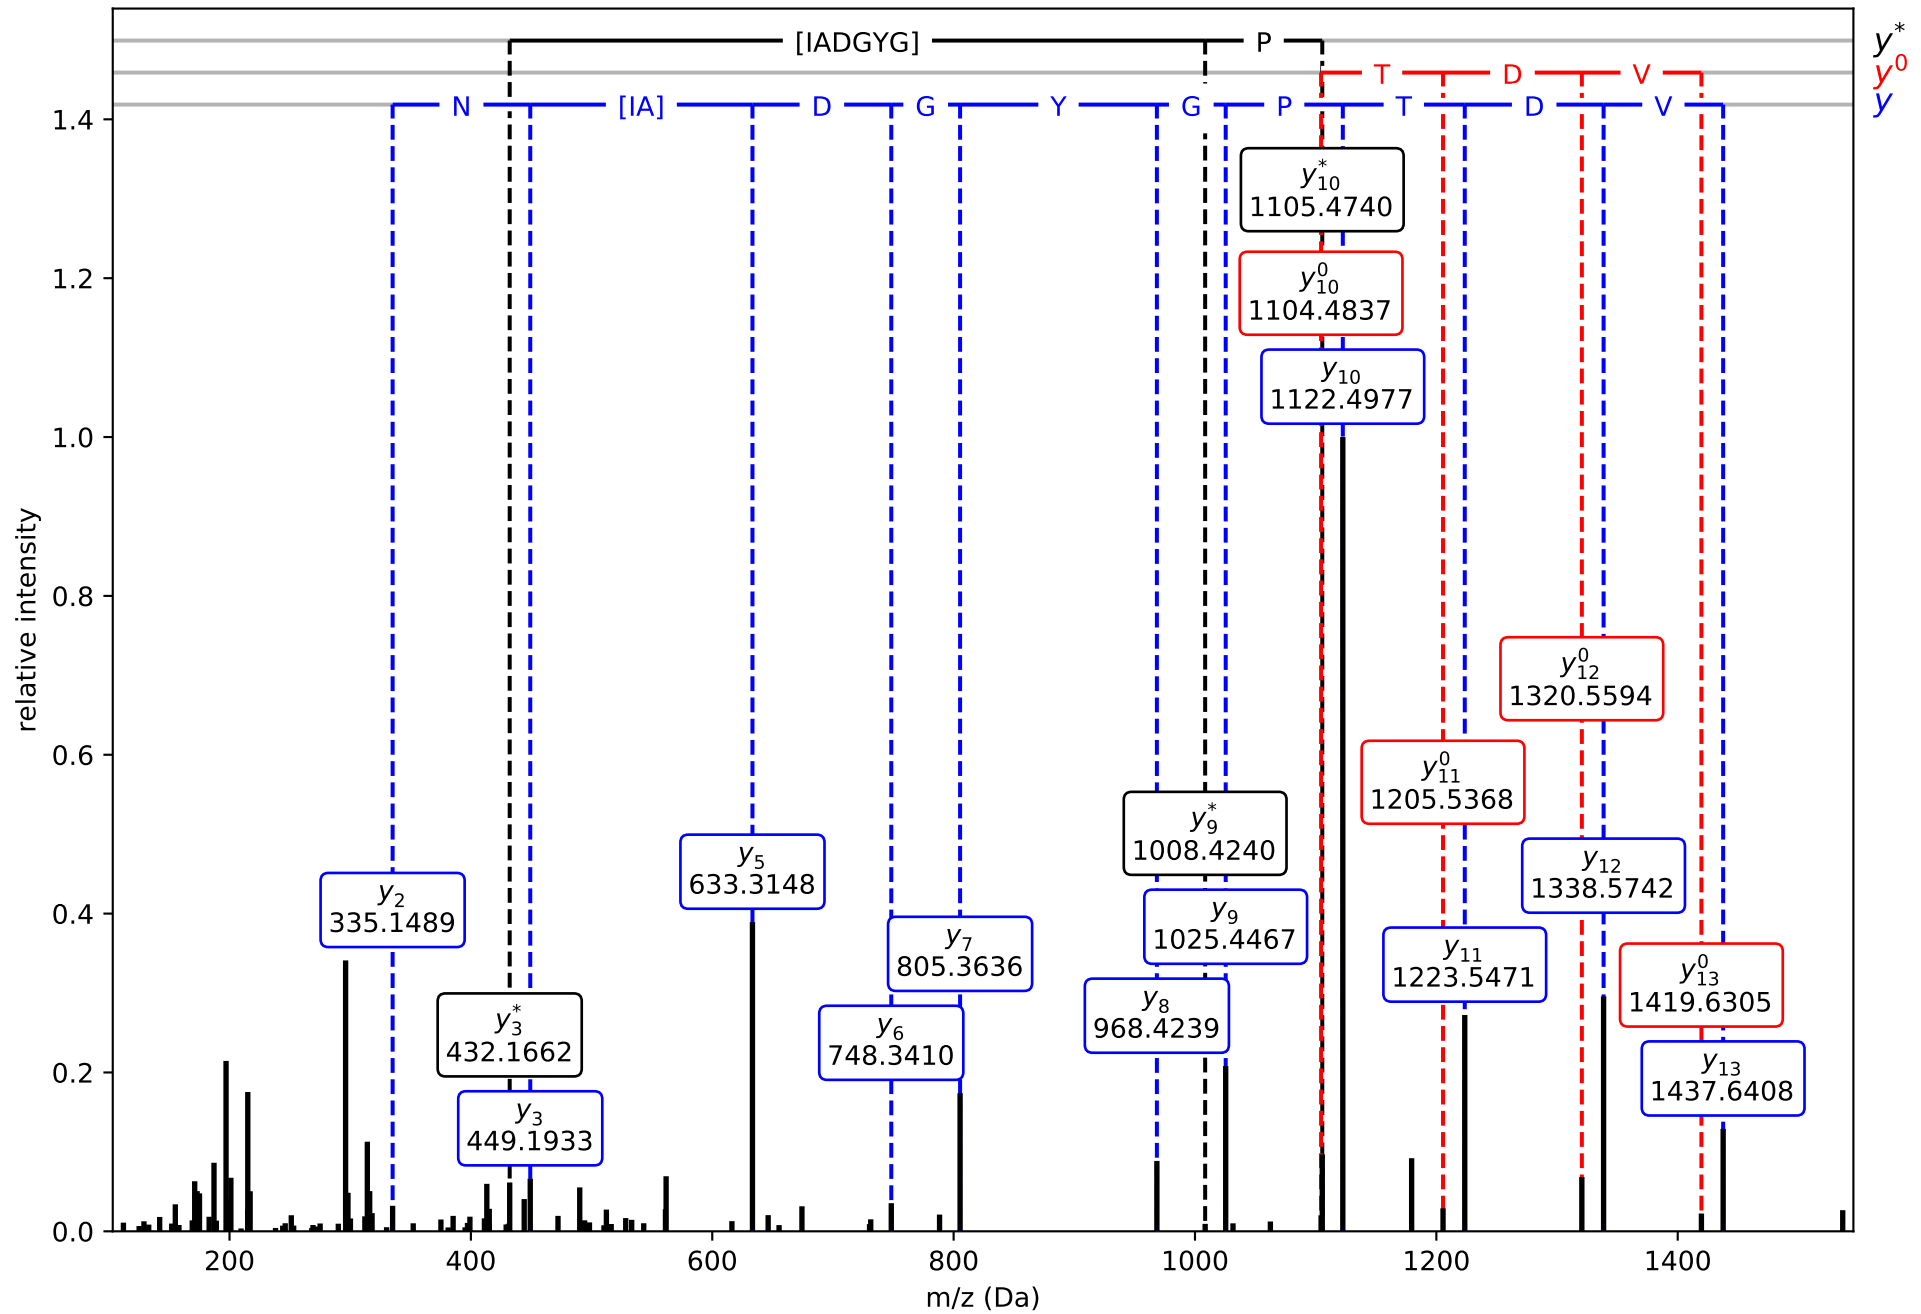

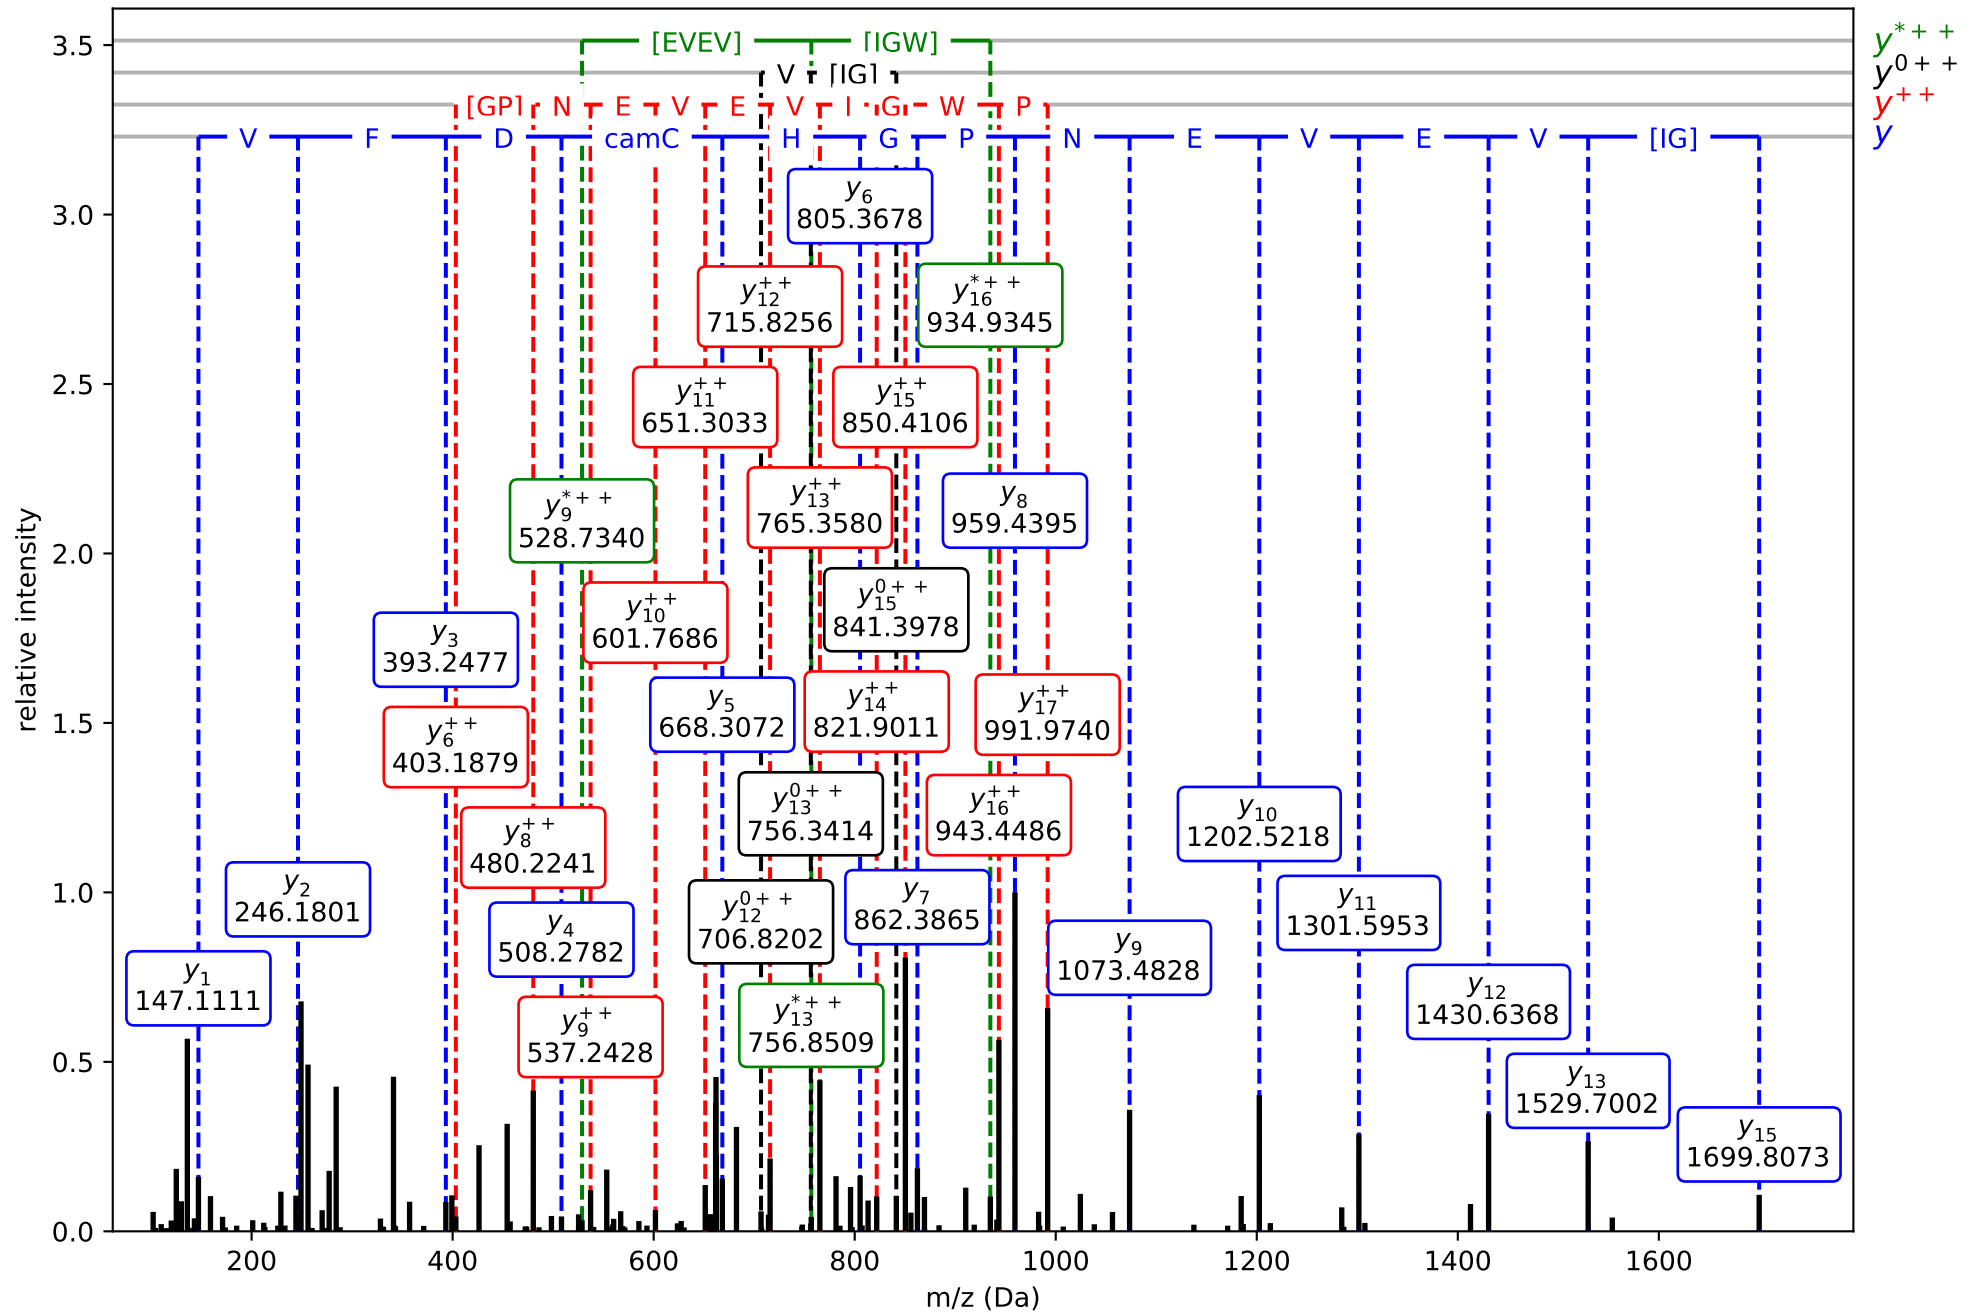

Q9QZI9 : KIPGFcamCEGGFQIK

parent: 494.2573, 3+

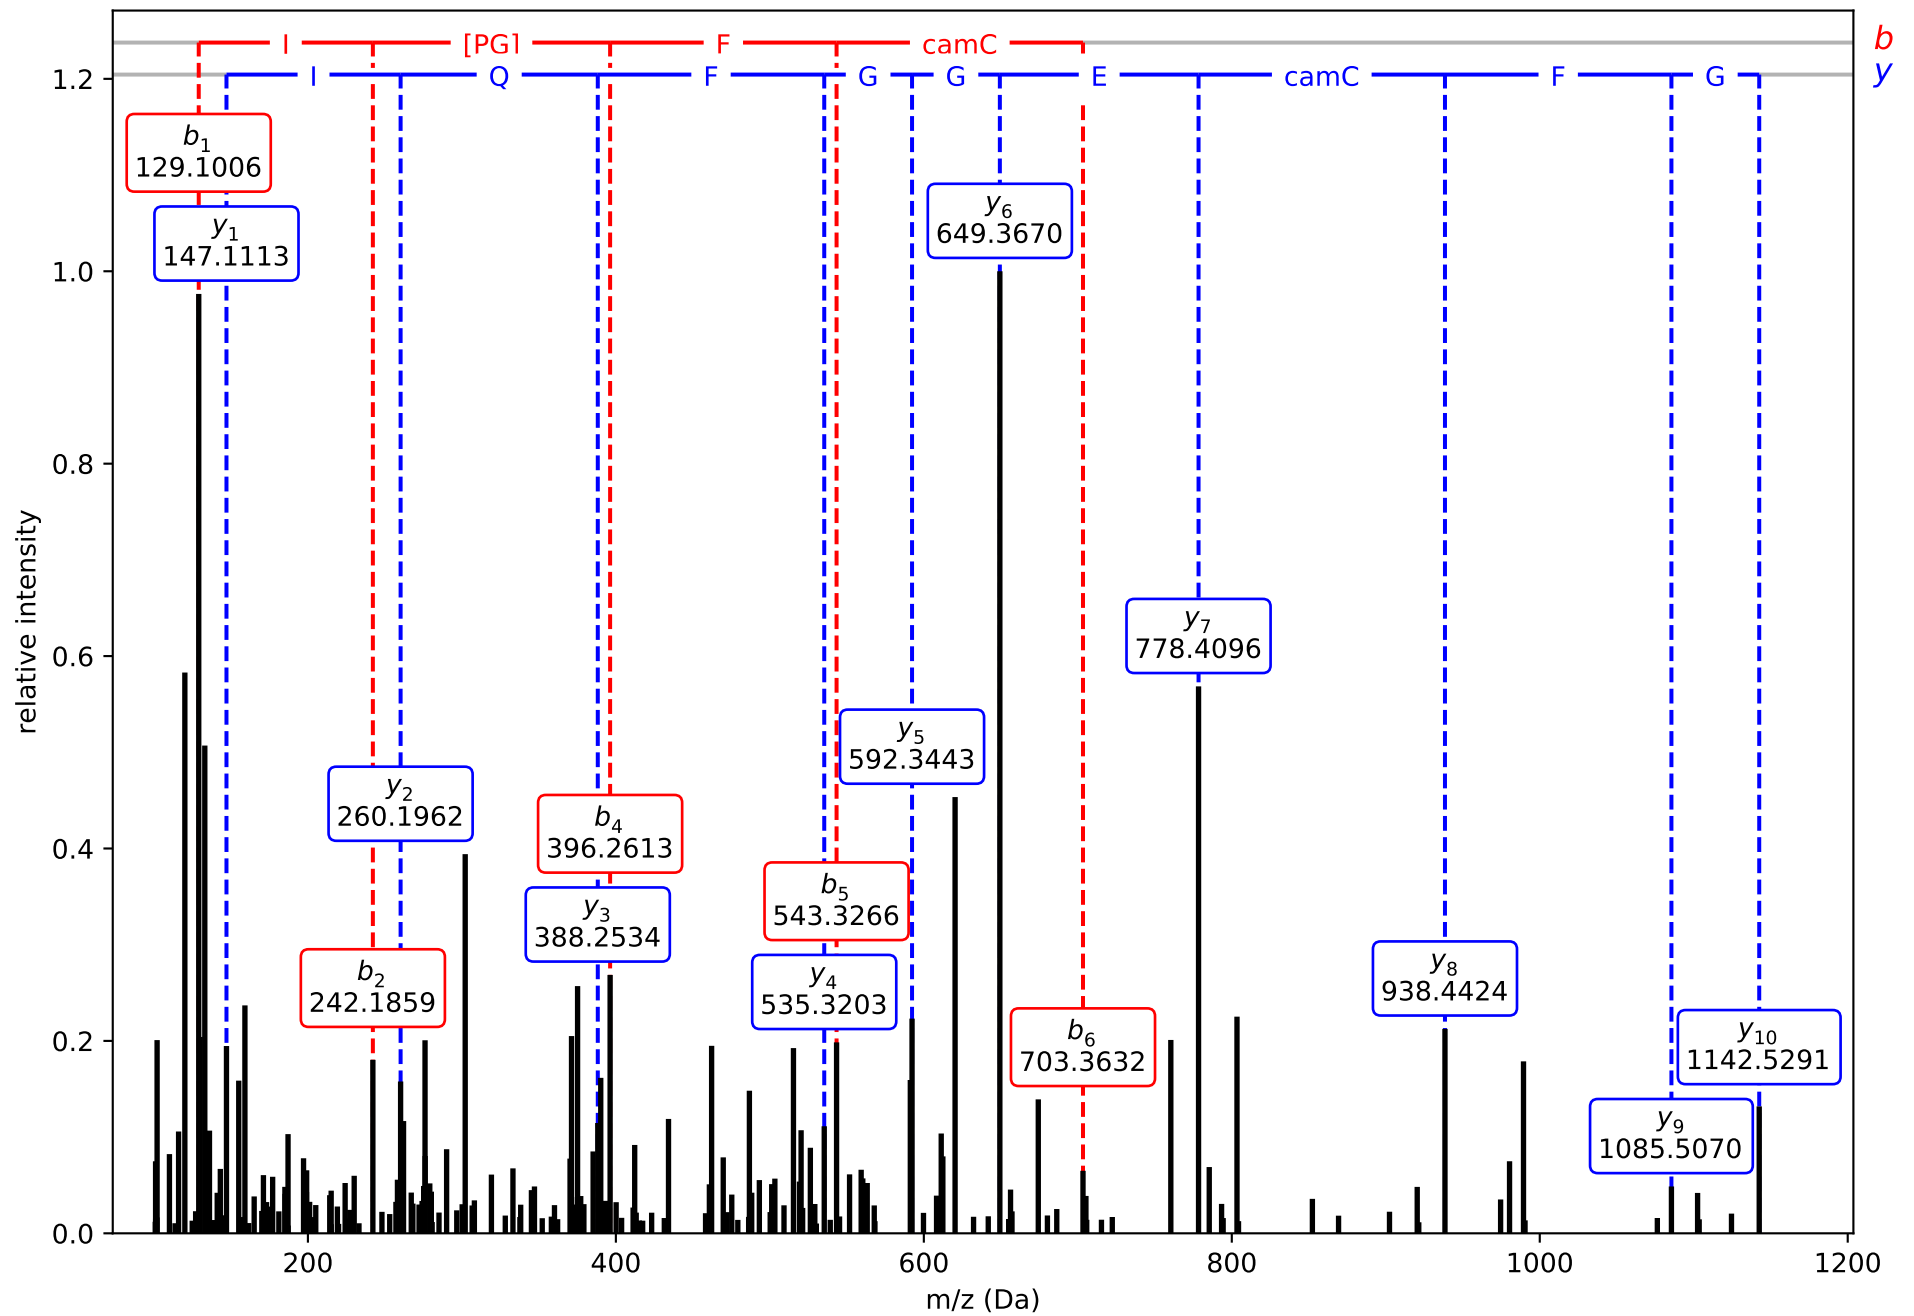

Q8BHJ6 : DHIPFFEEFcamCCK

parent: 532.9206, 3+

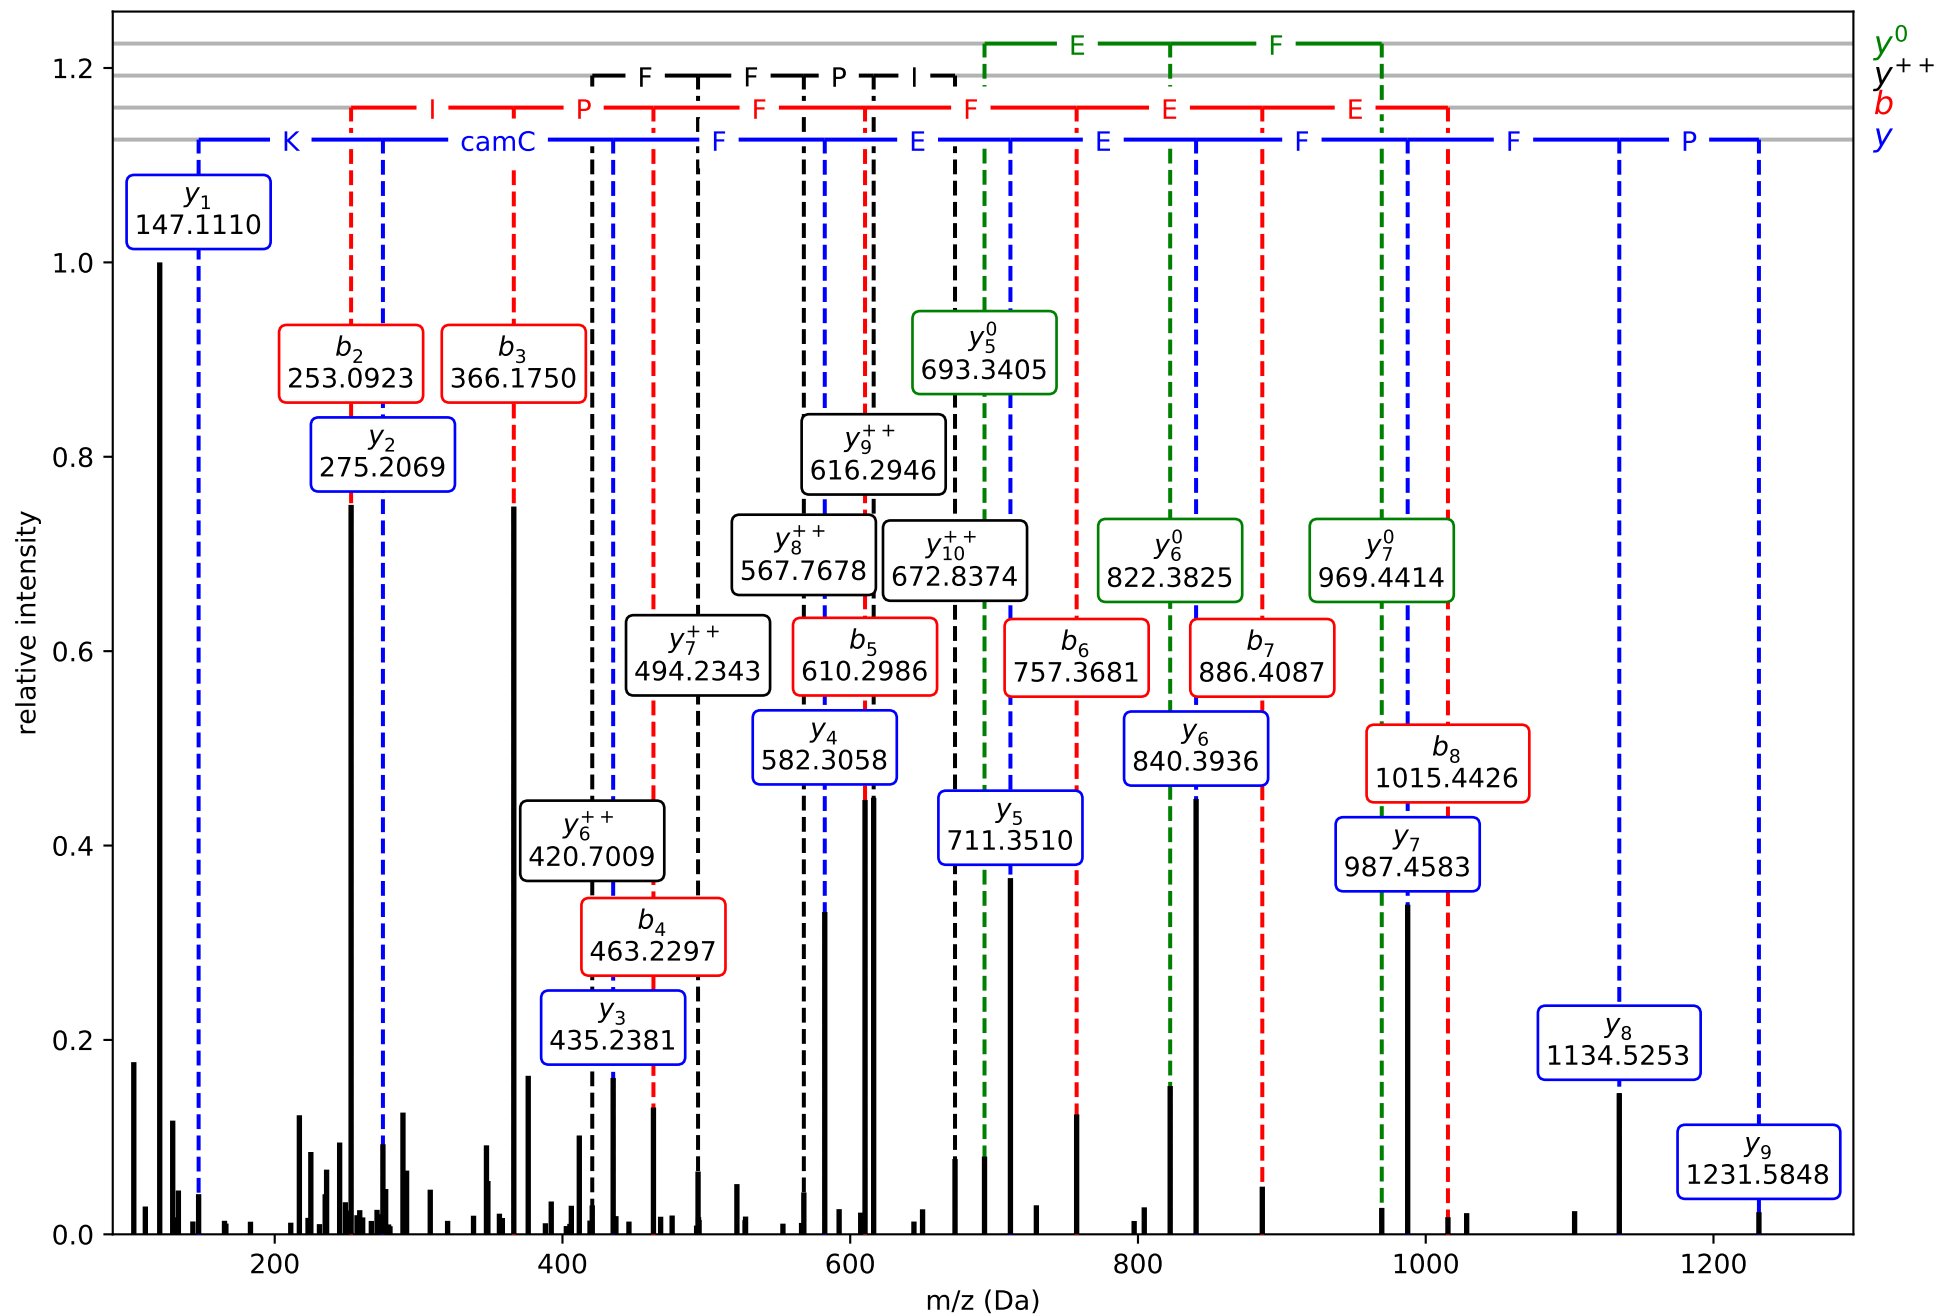

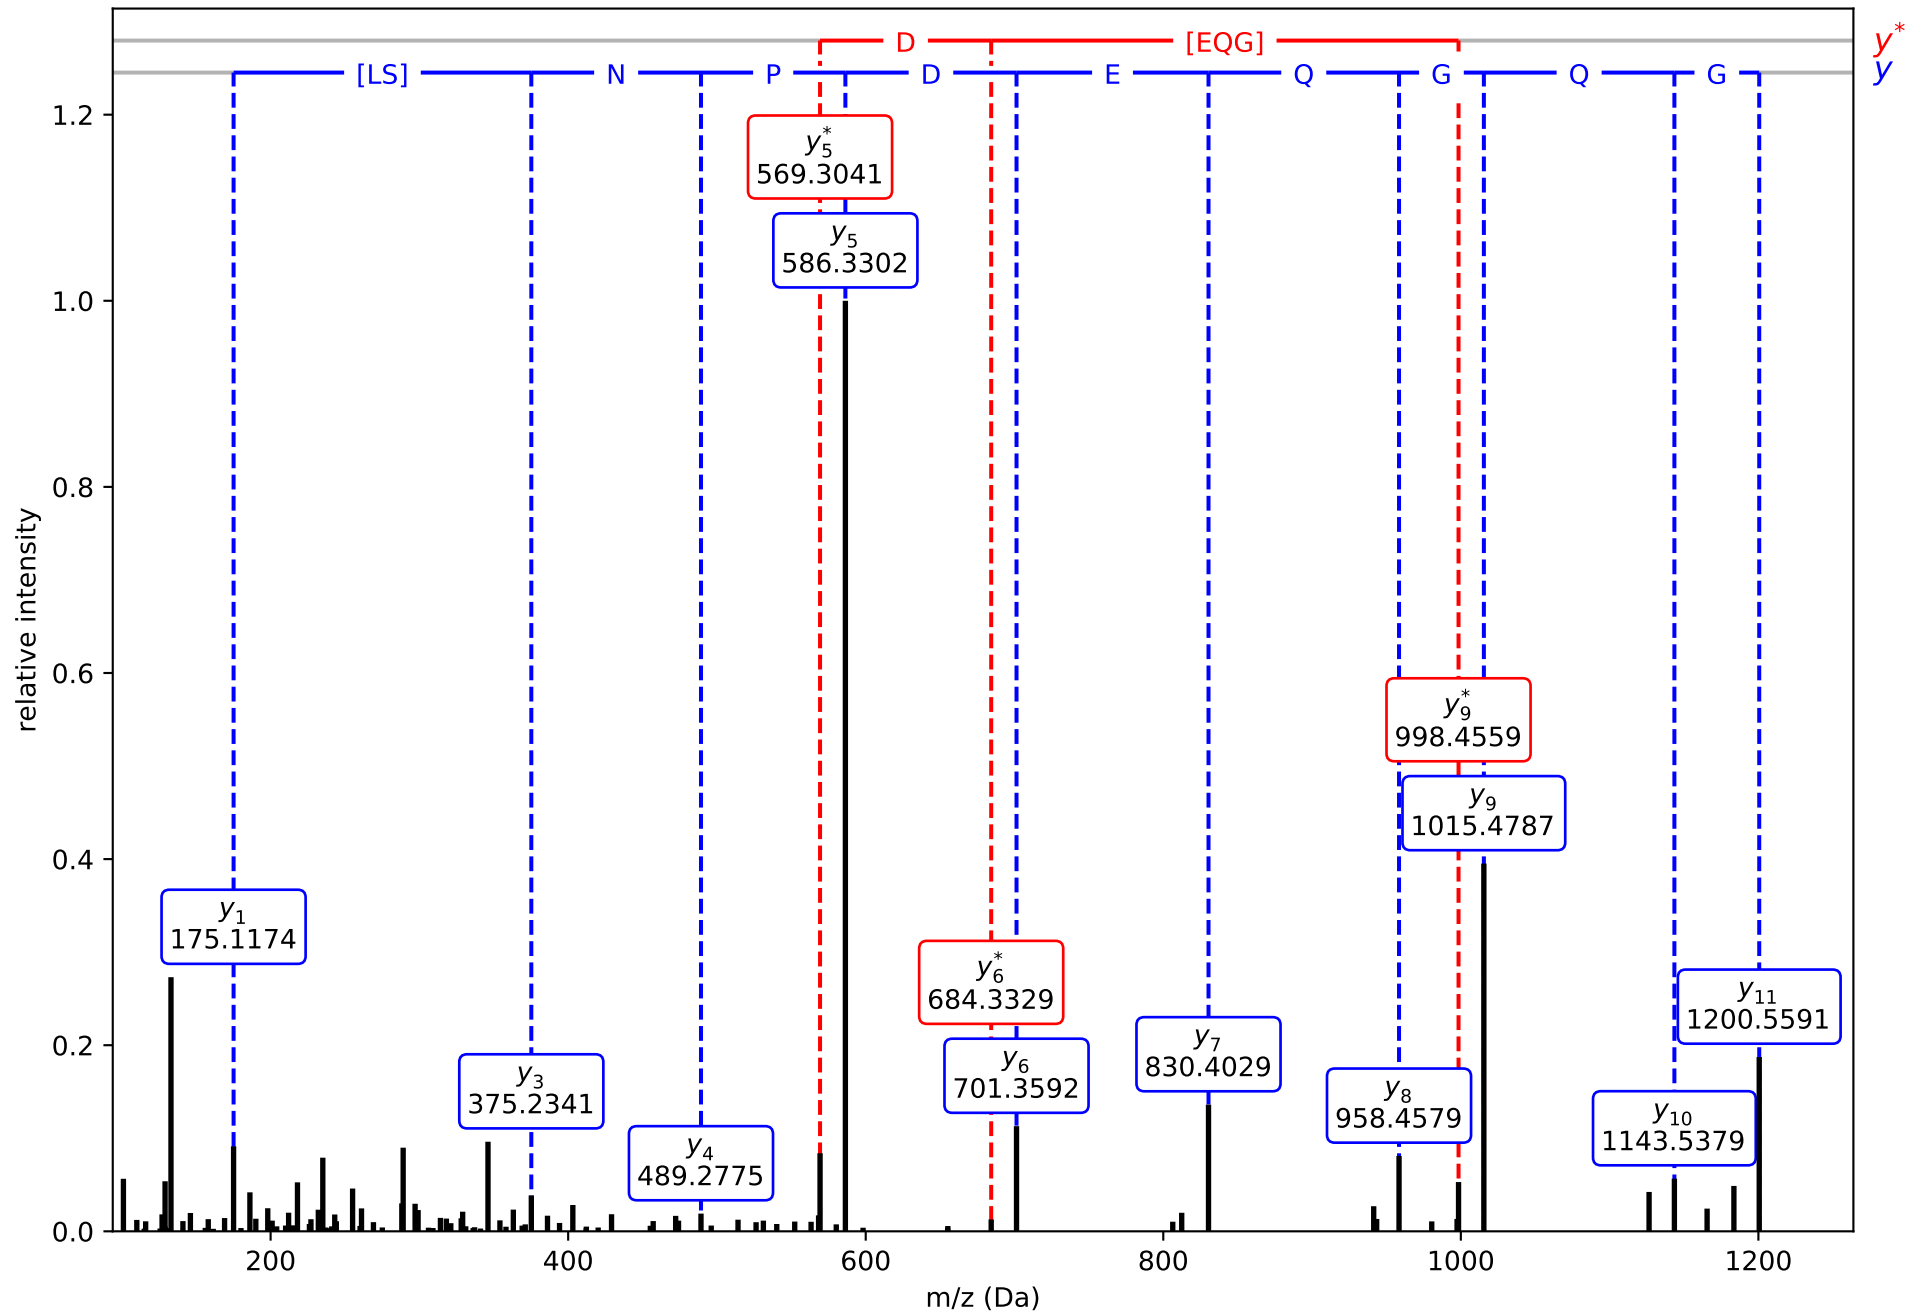

Q8VHJ5 : QIVSAVQYcamCHQK

parent: 487.5818, 3+

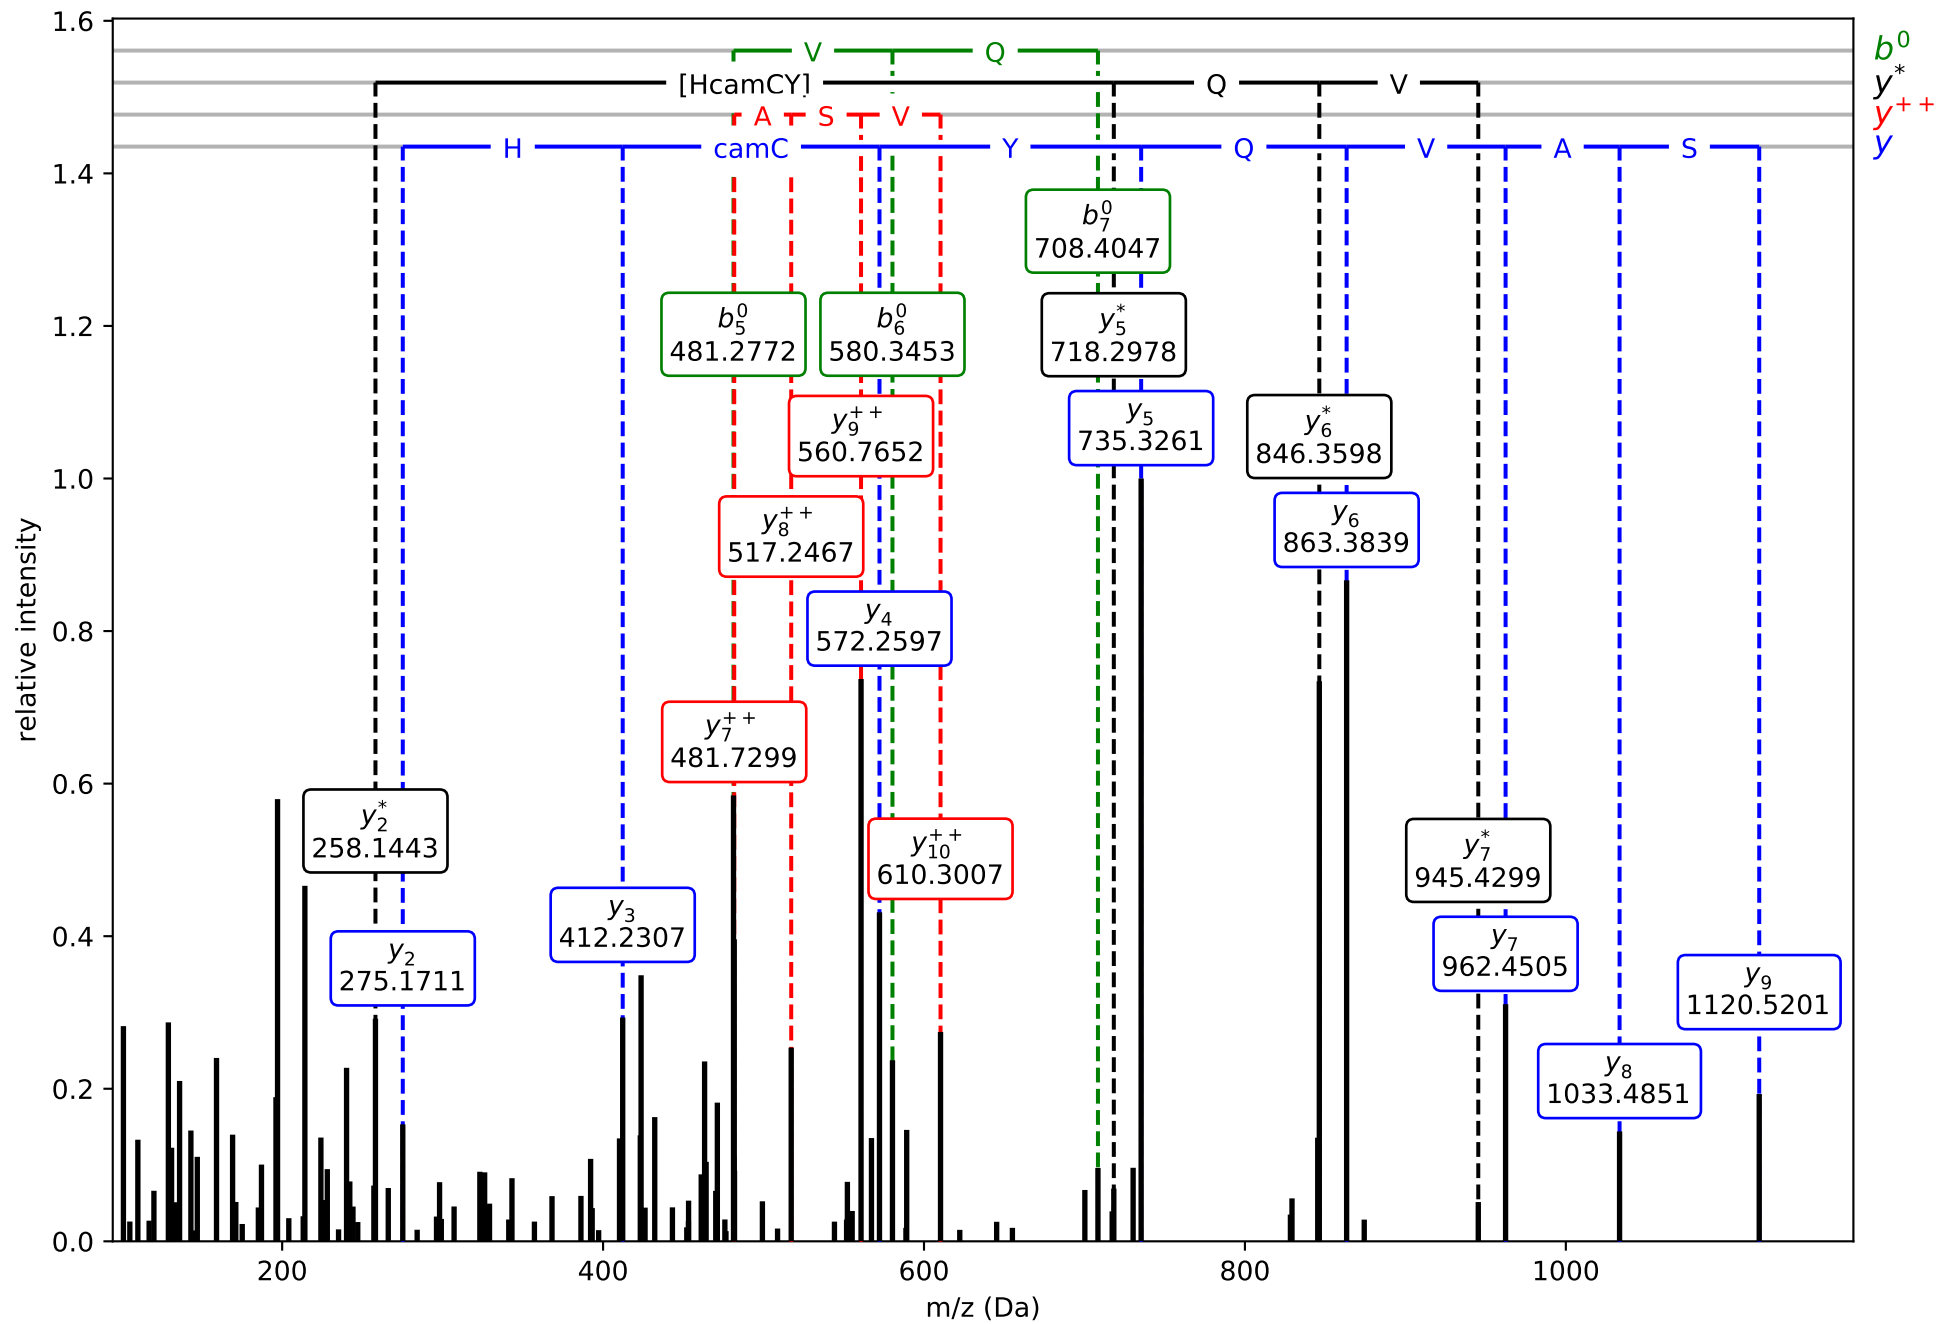

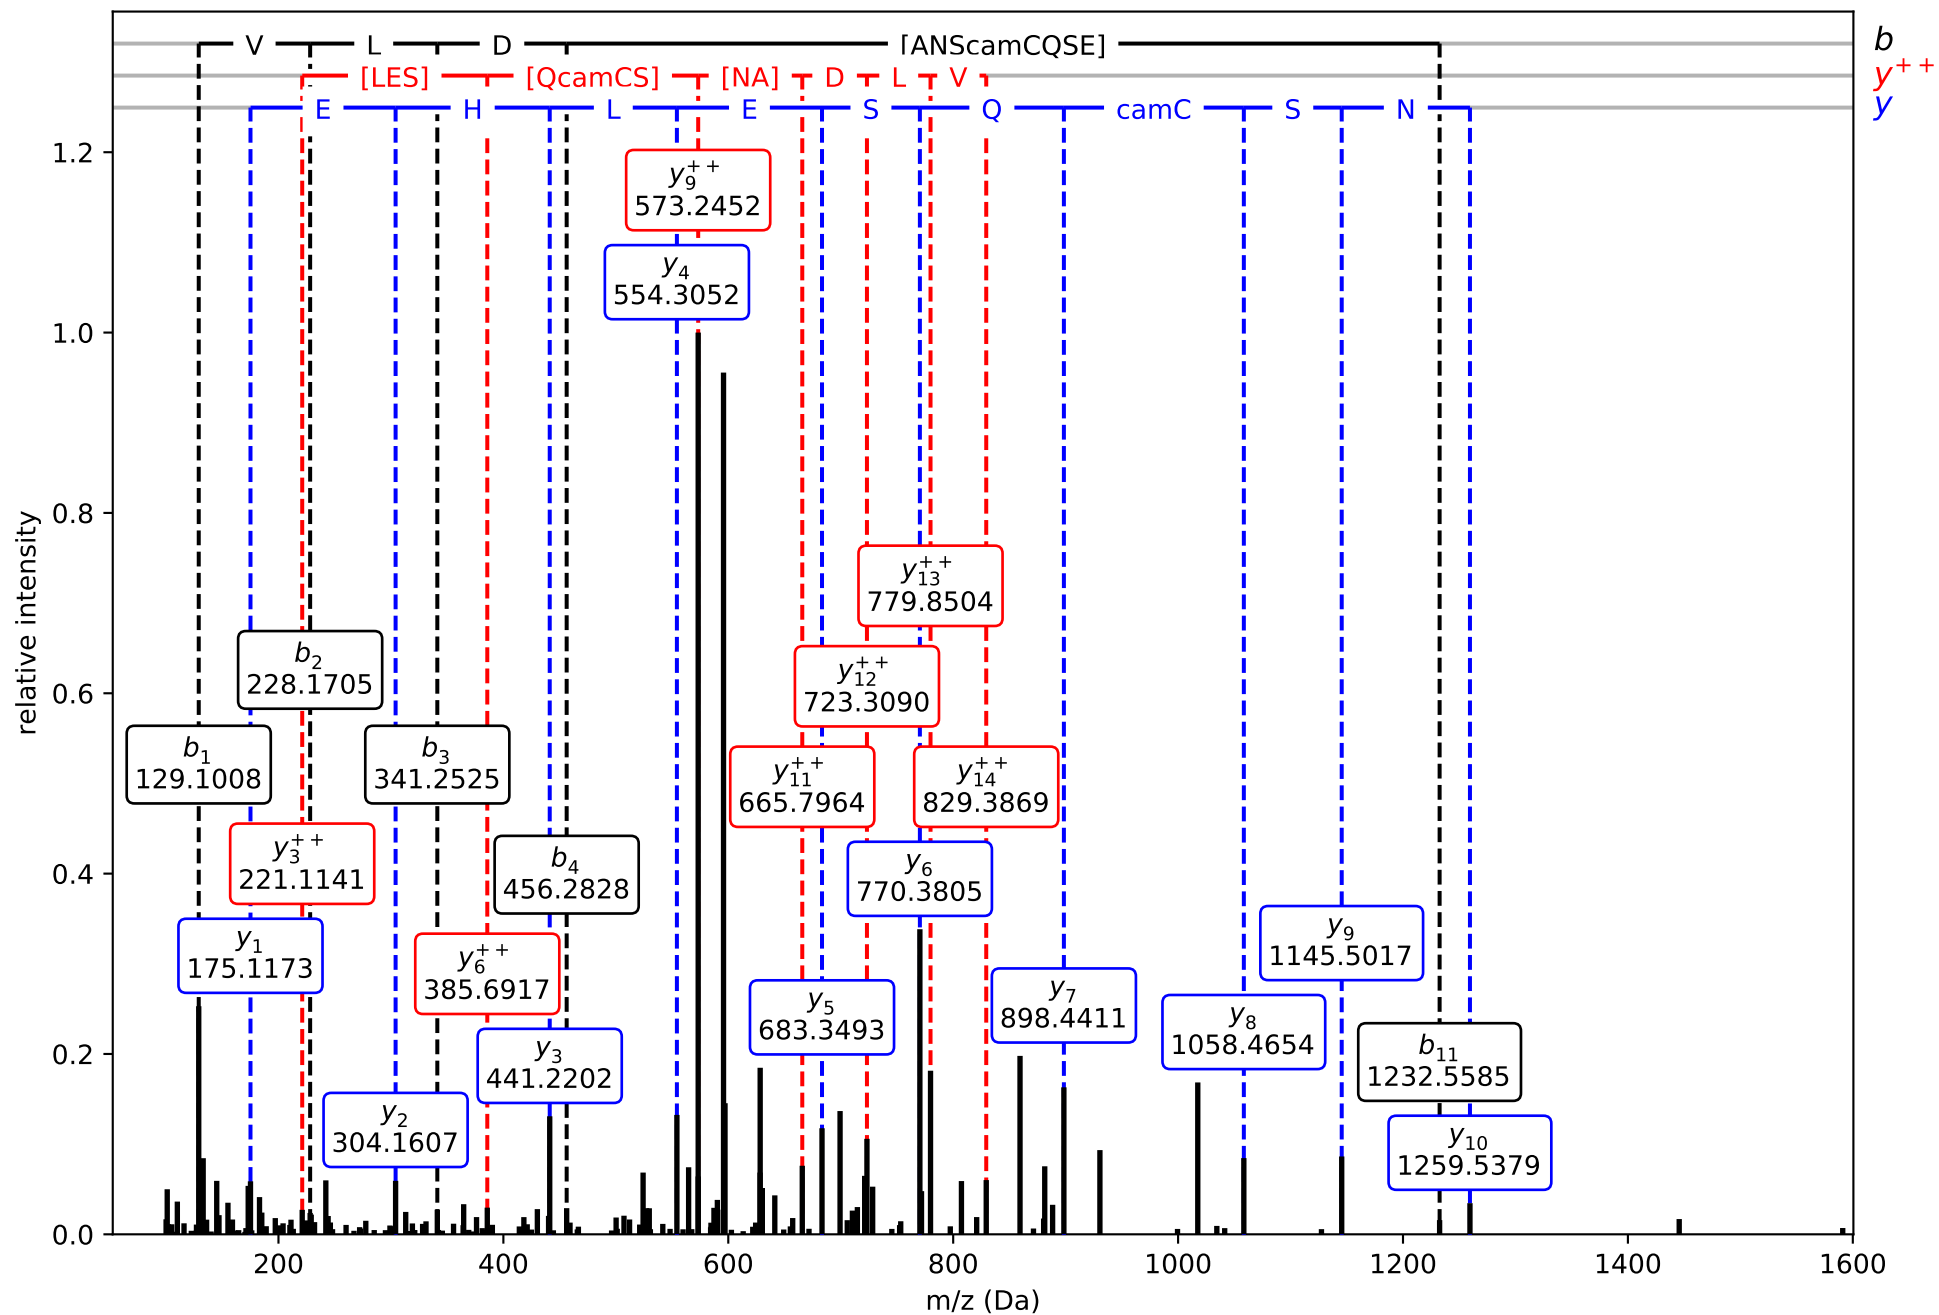



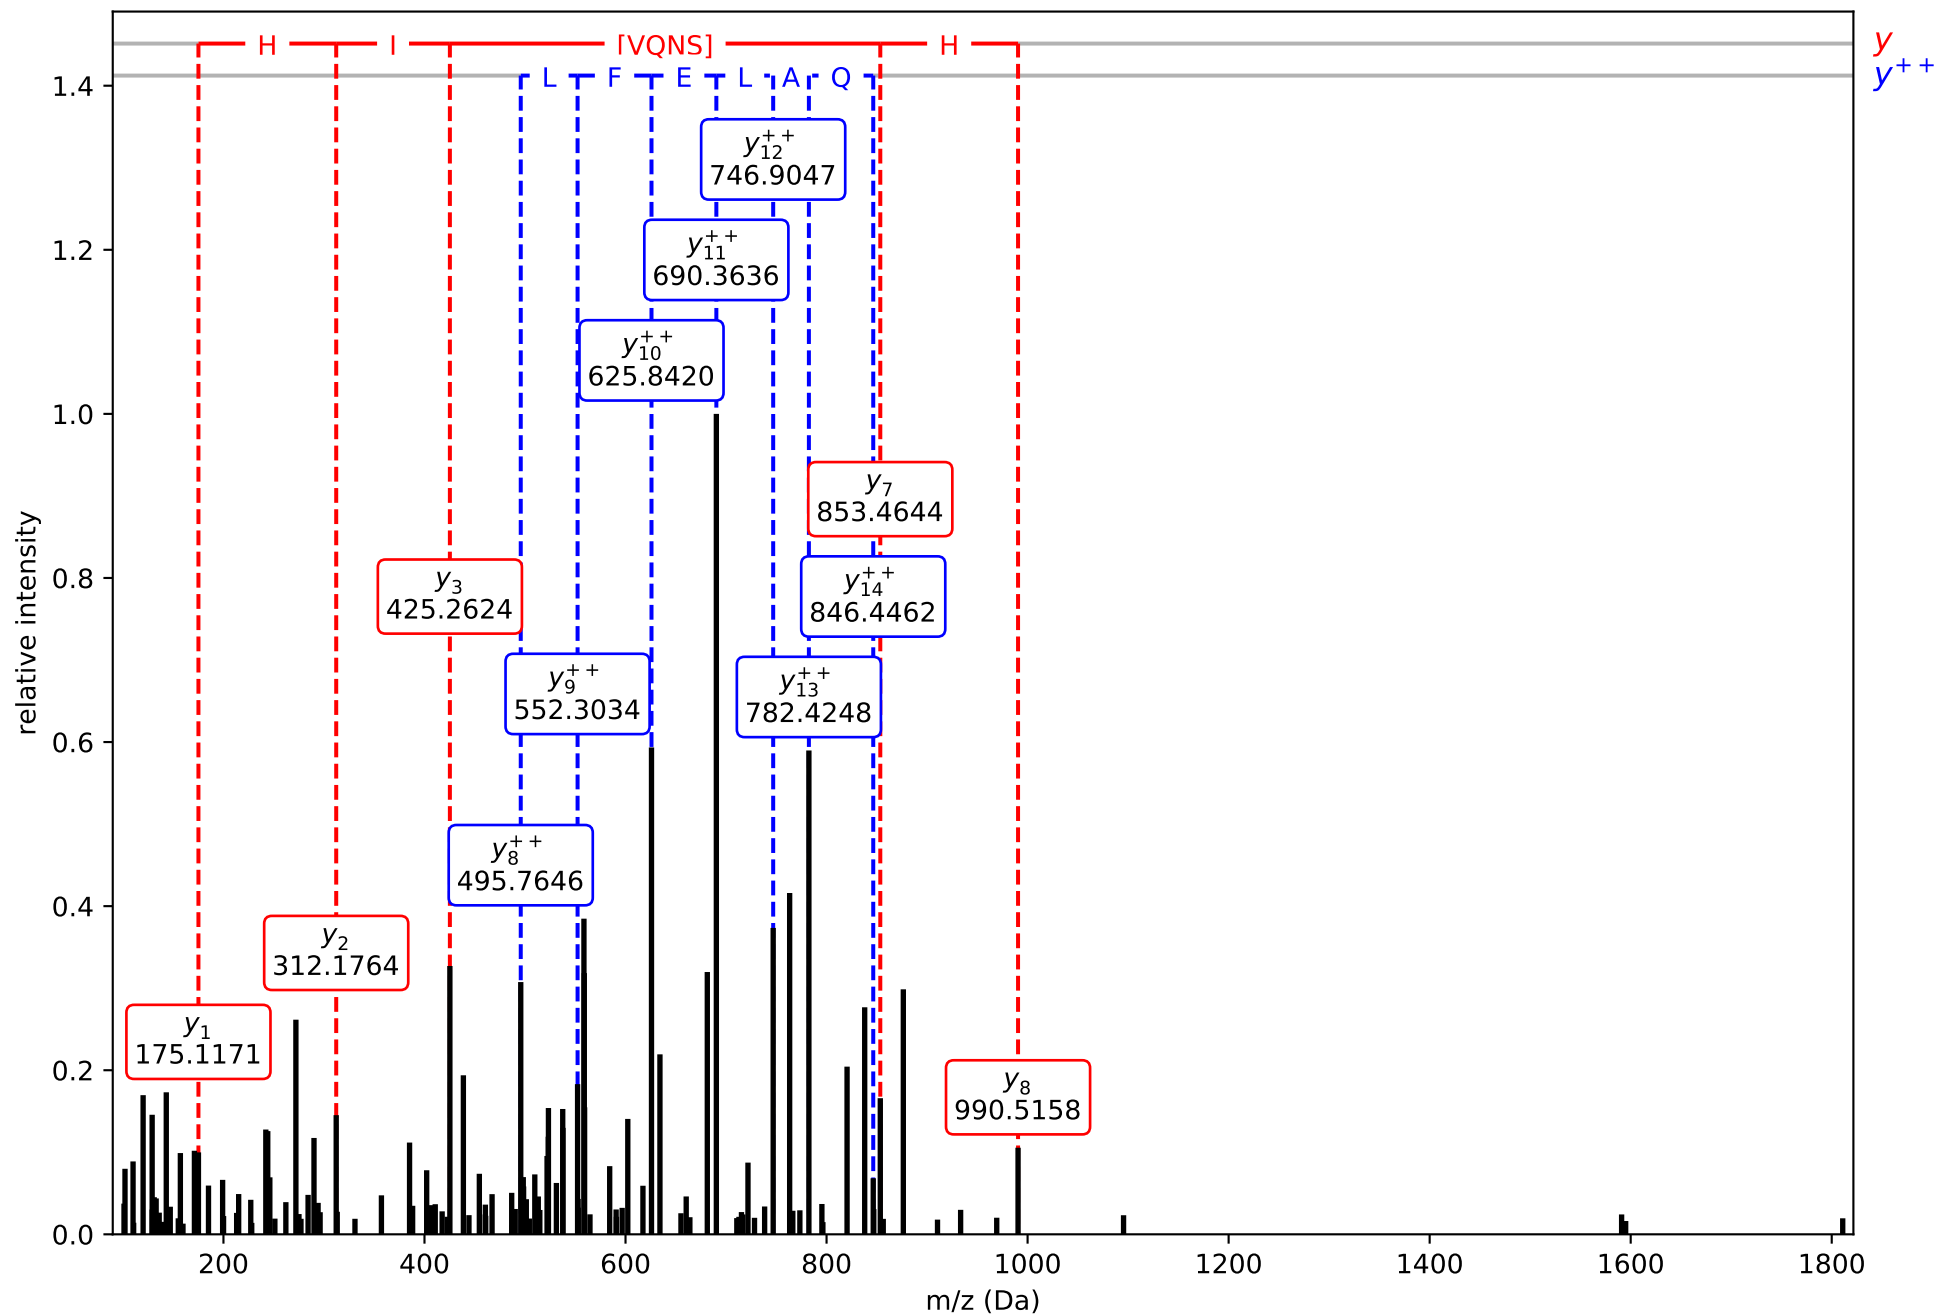

Q6P4S6 : QLQQEcamCEQLQK

parent: 716.3517, 2+

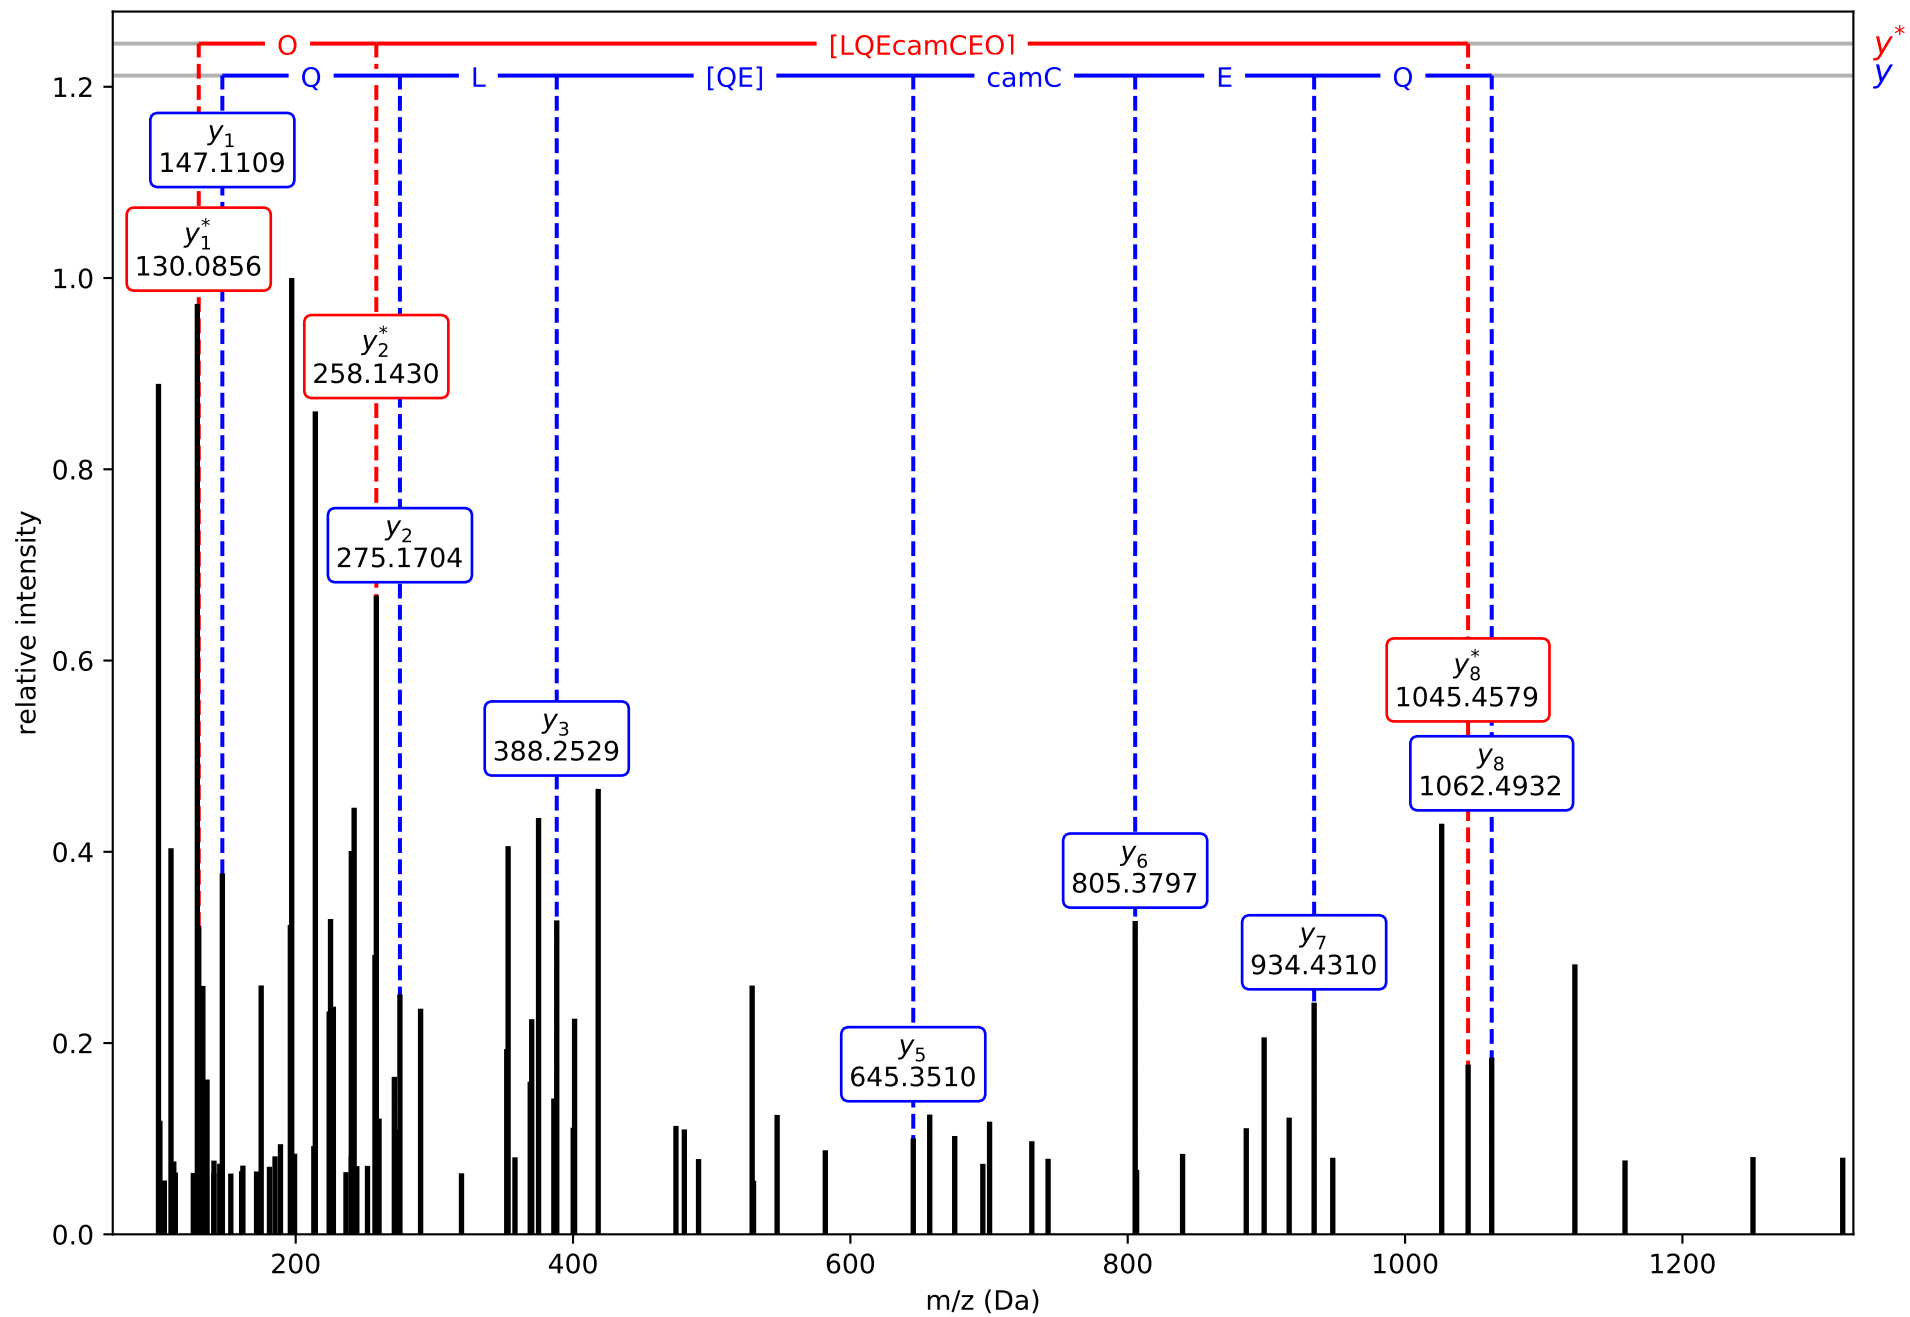

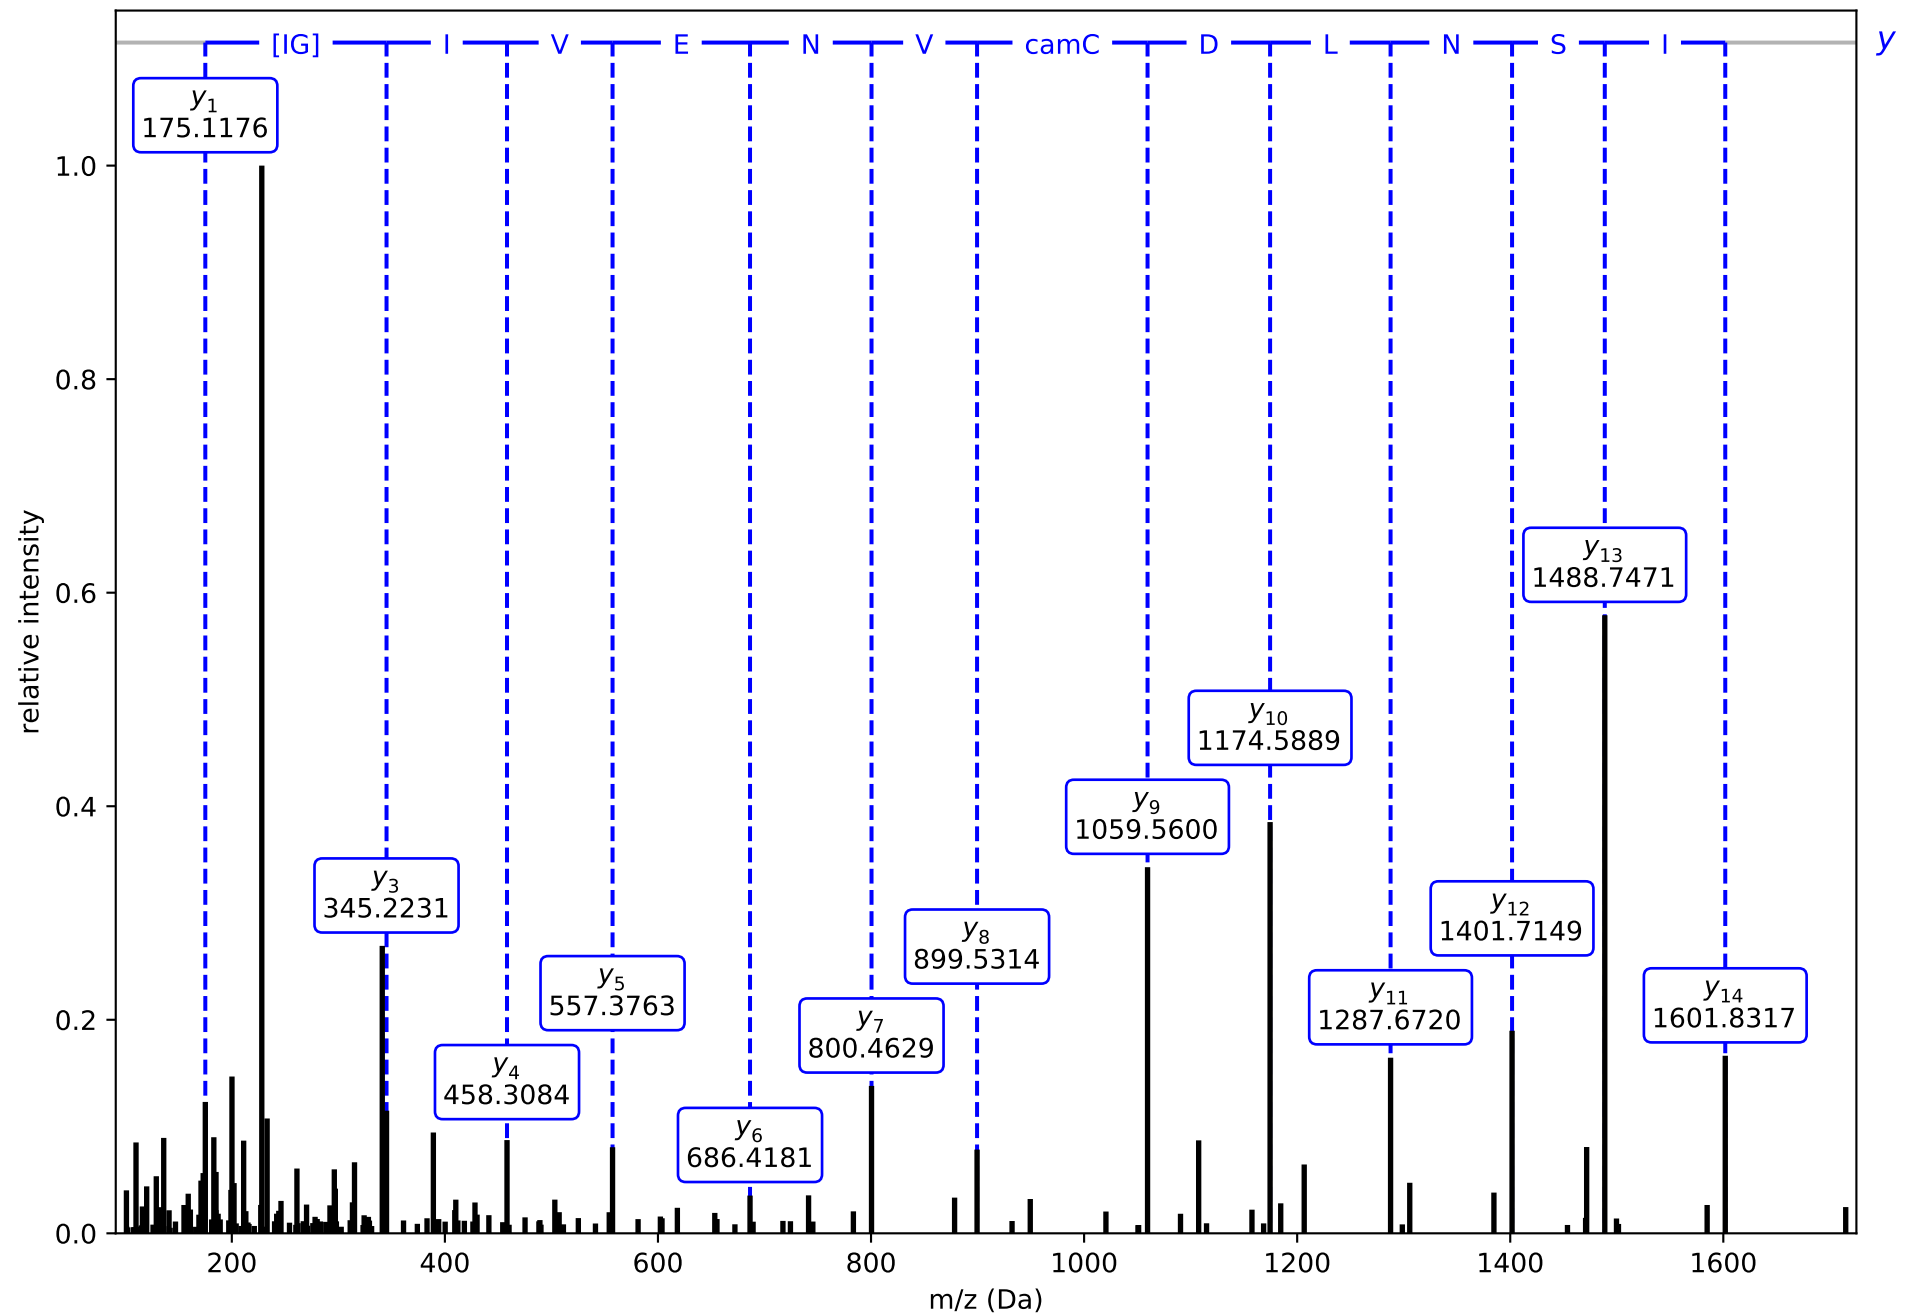

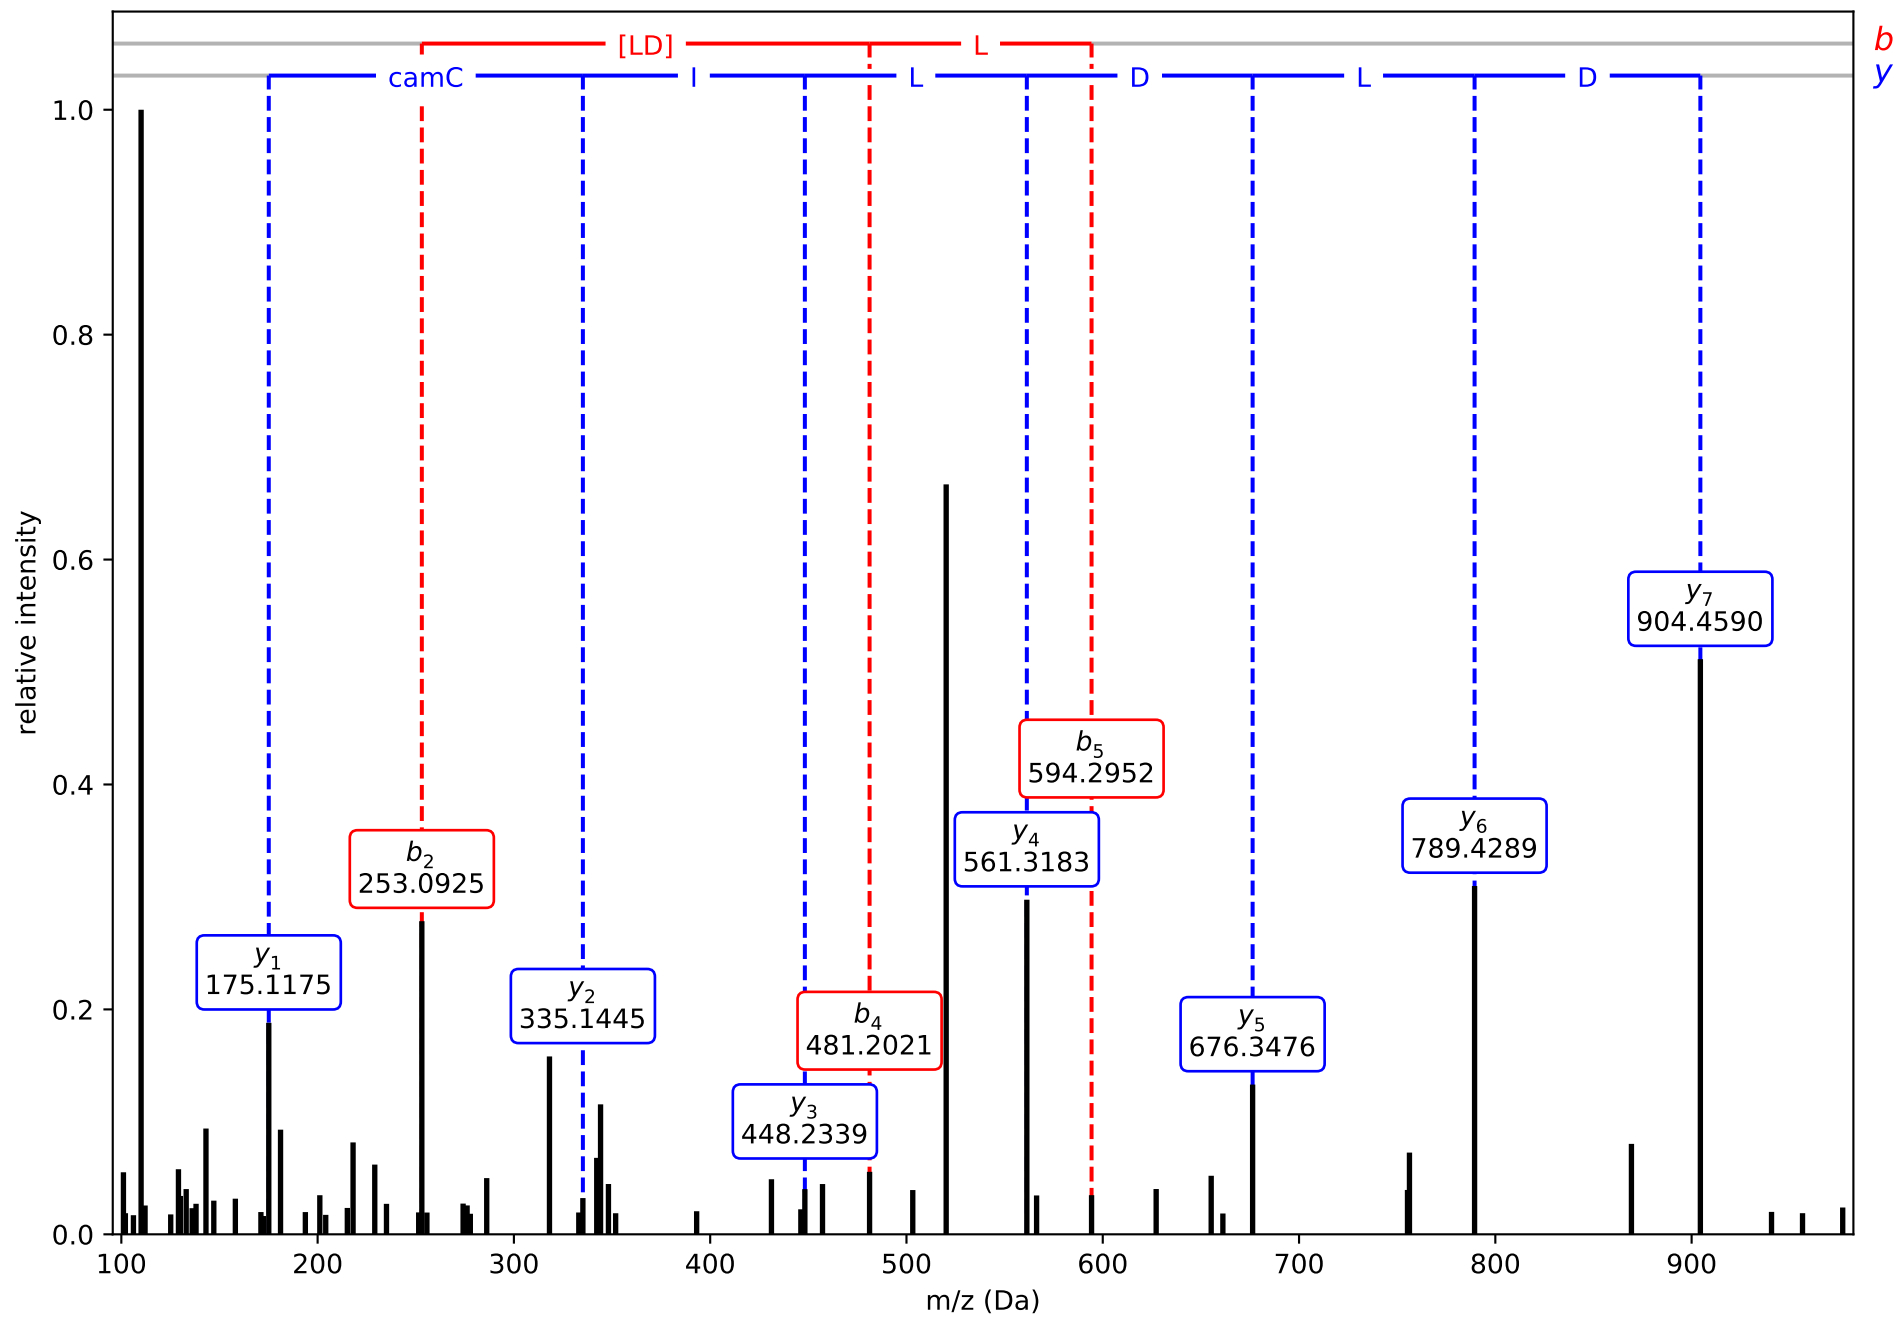

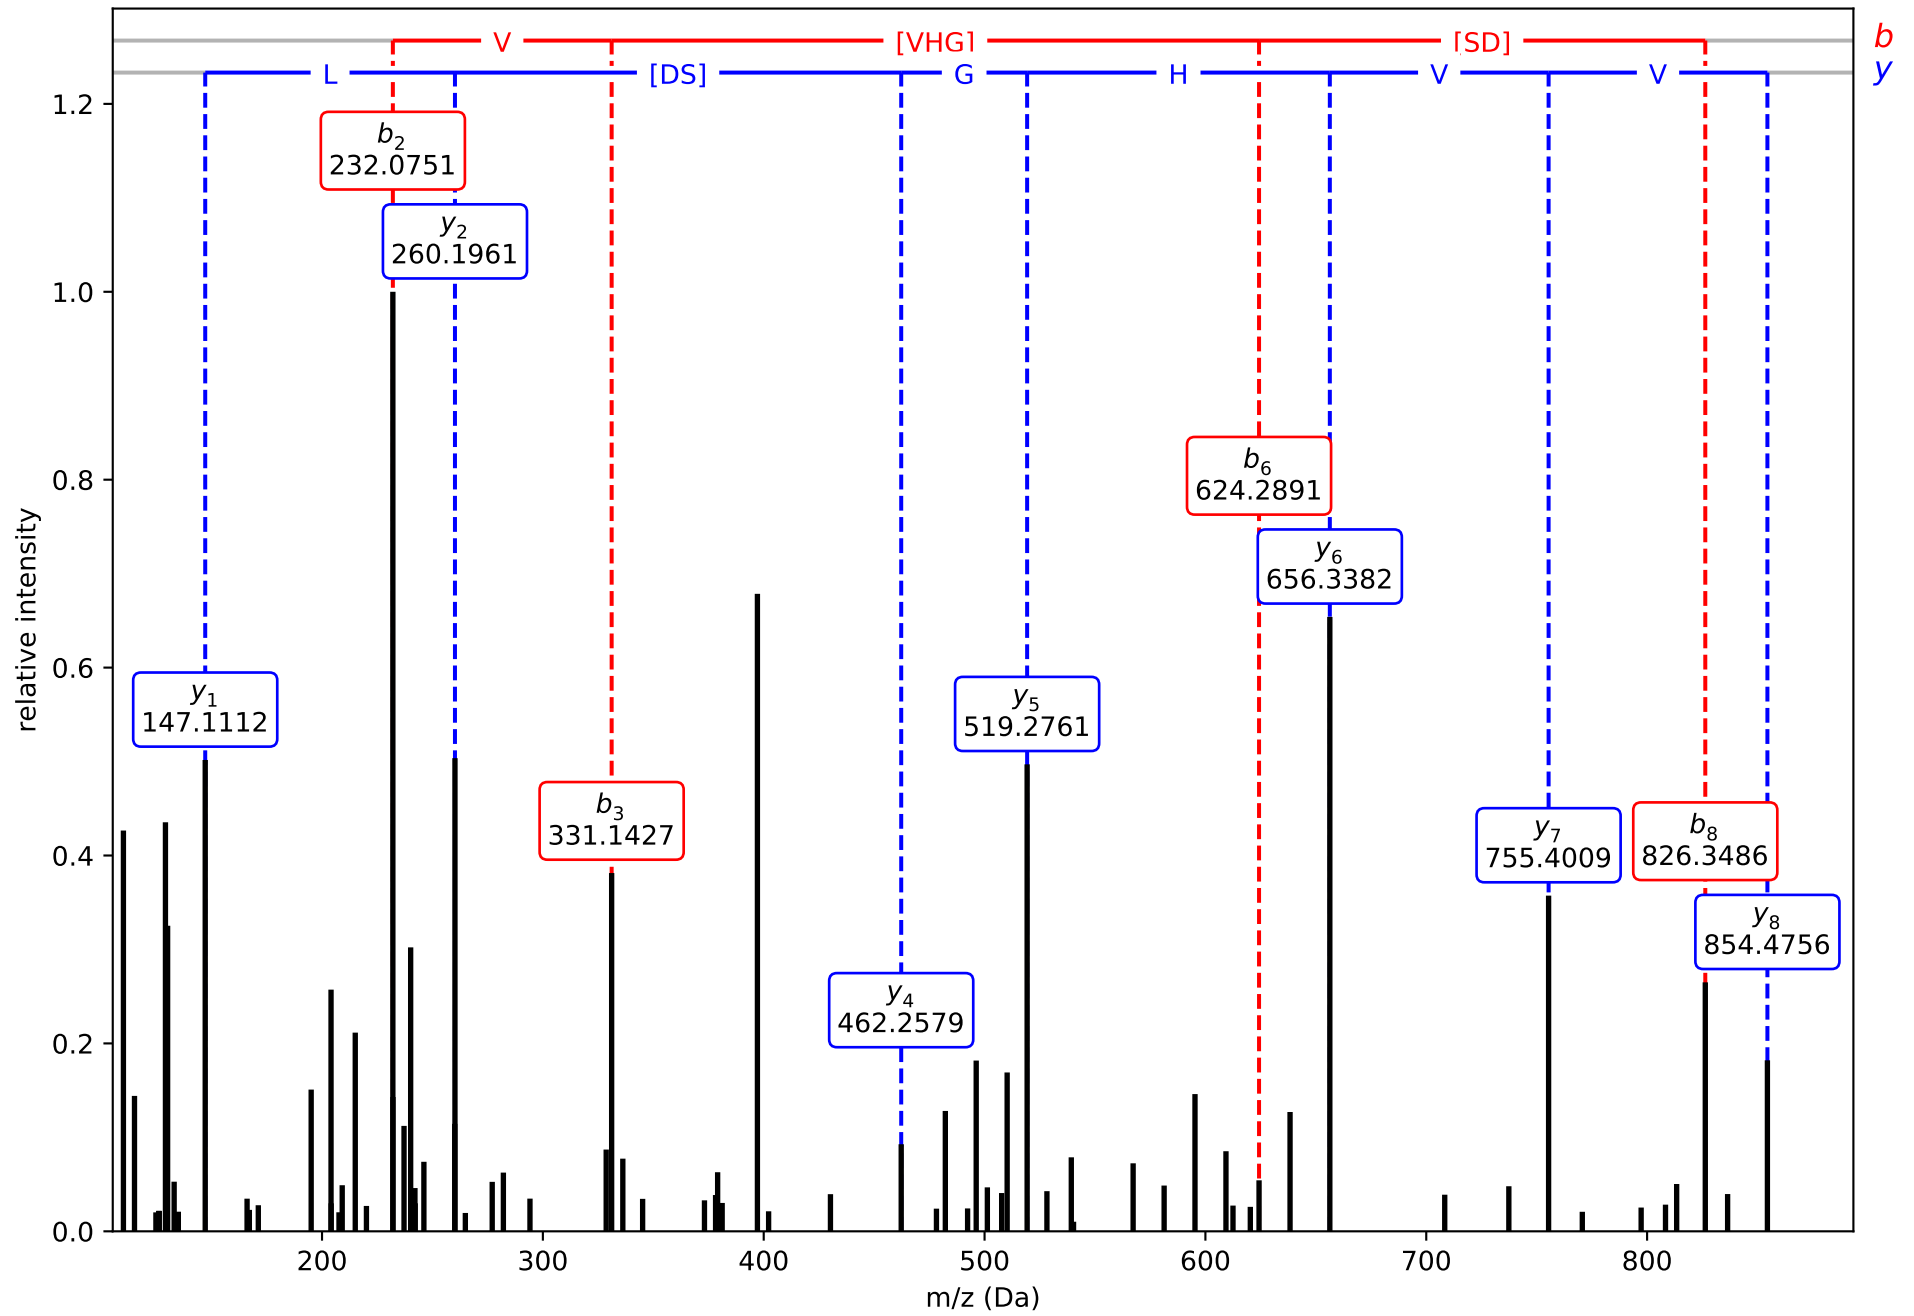

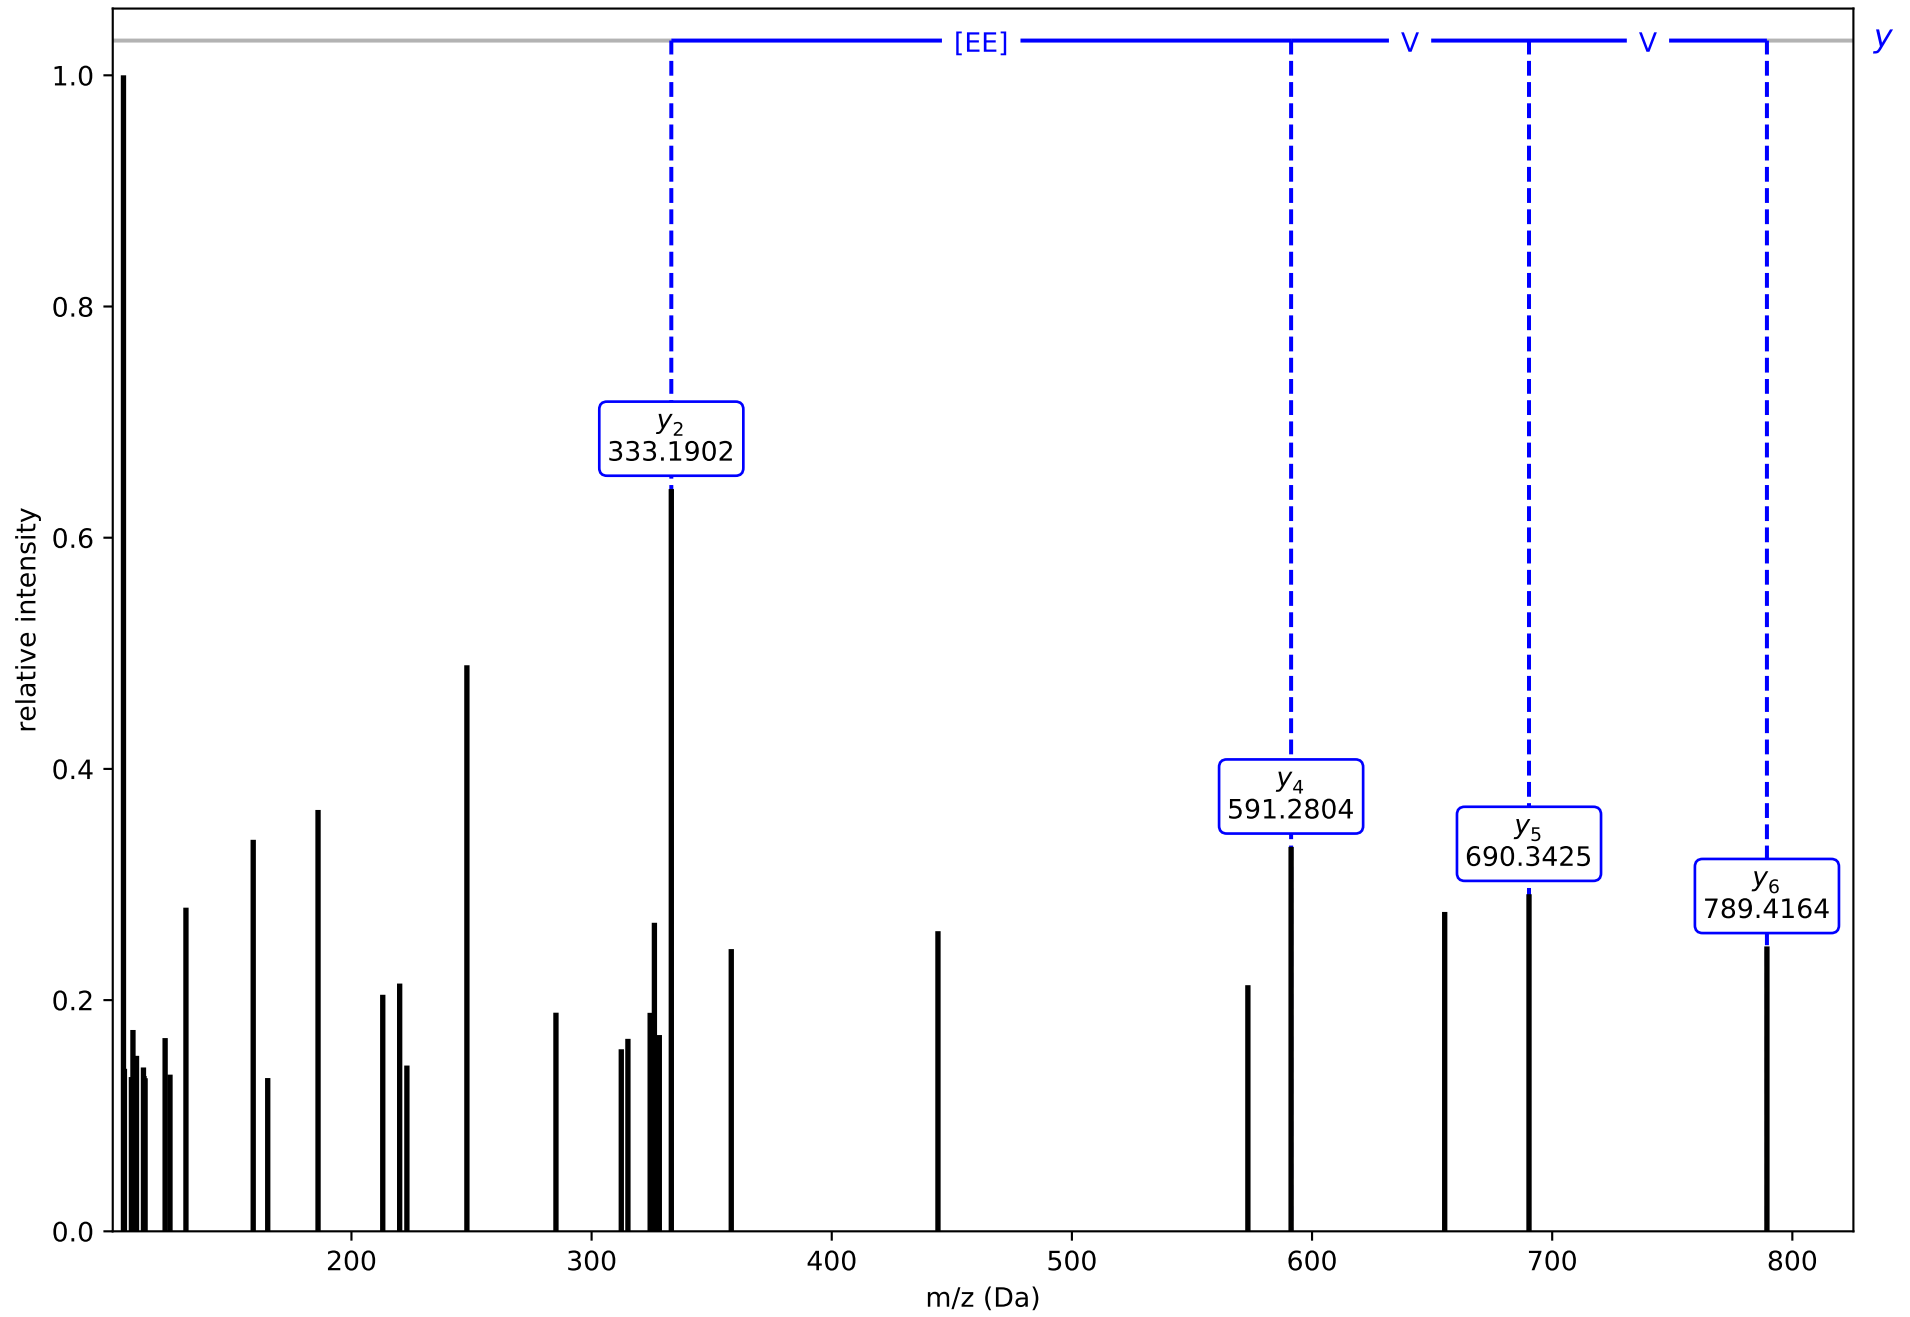

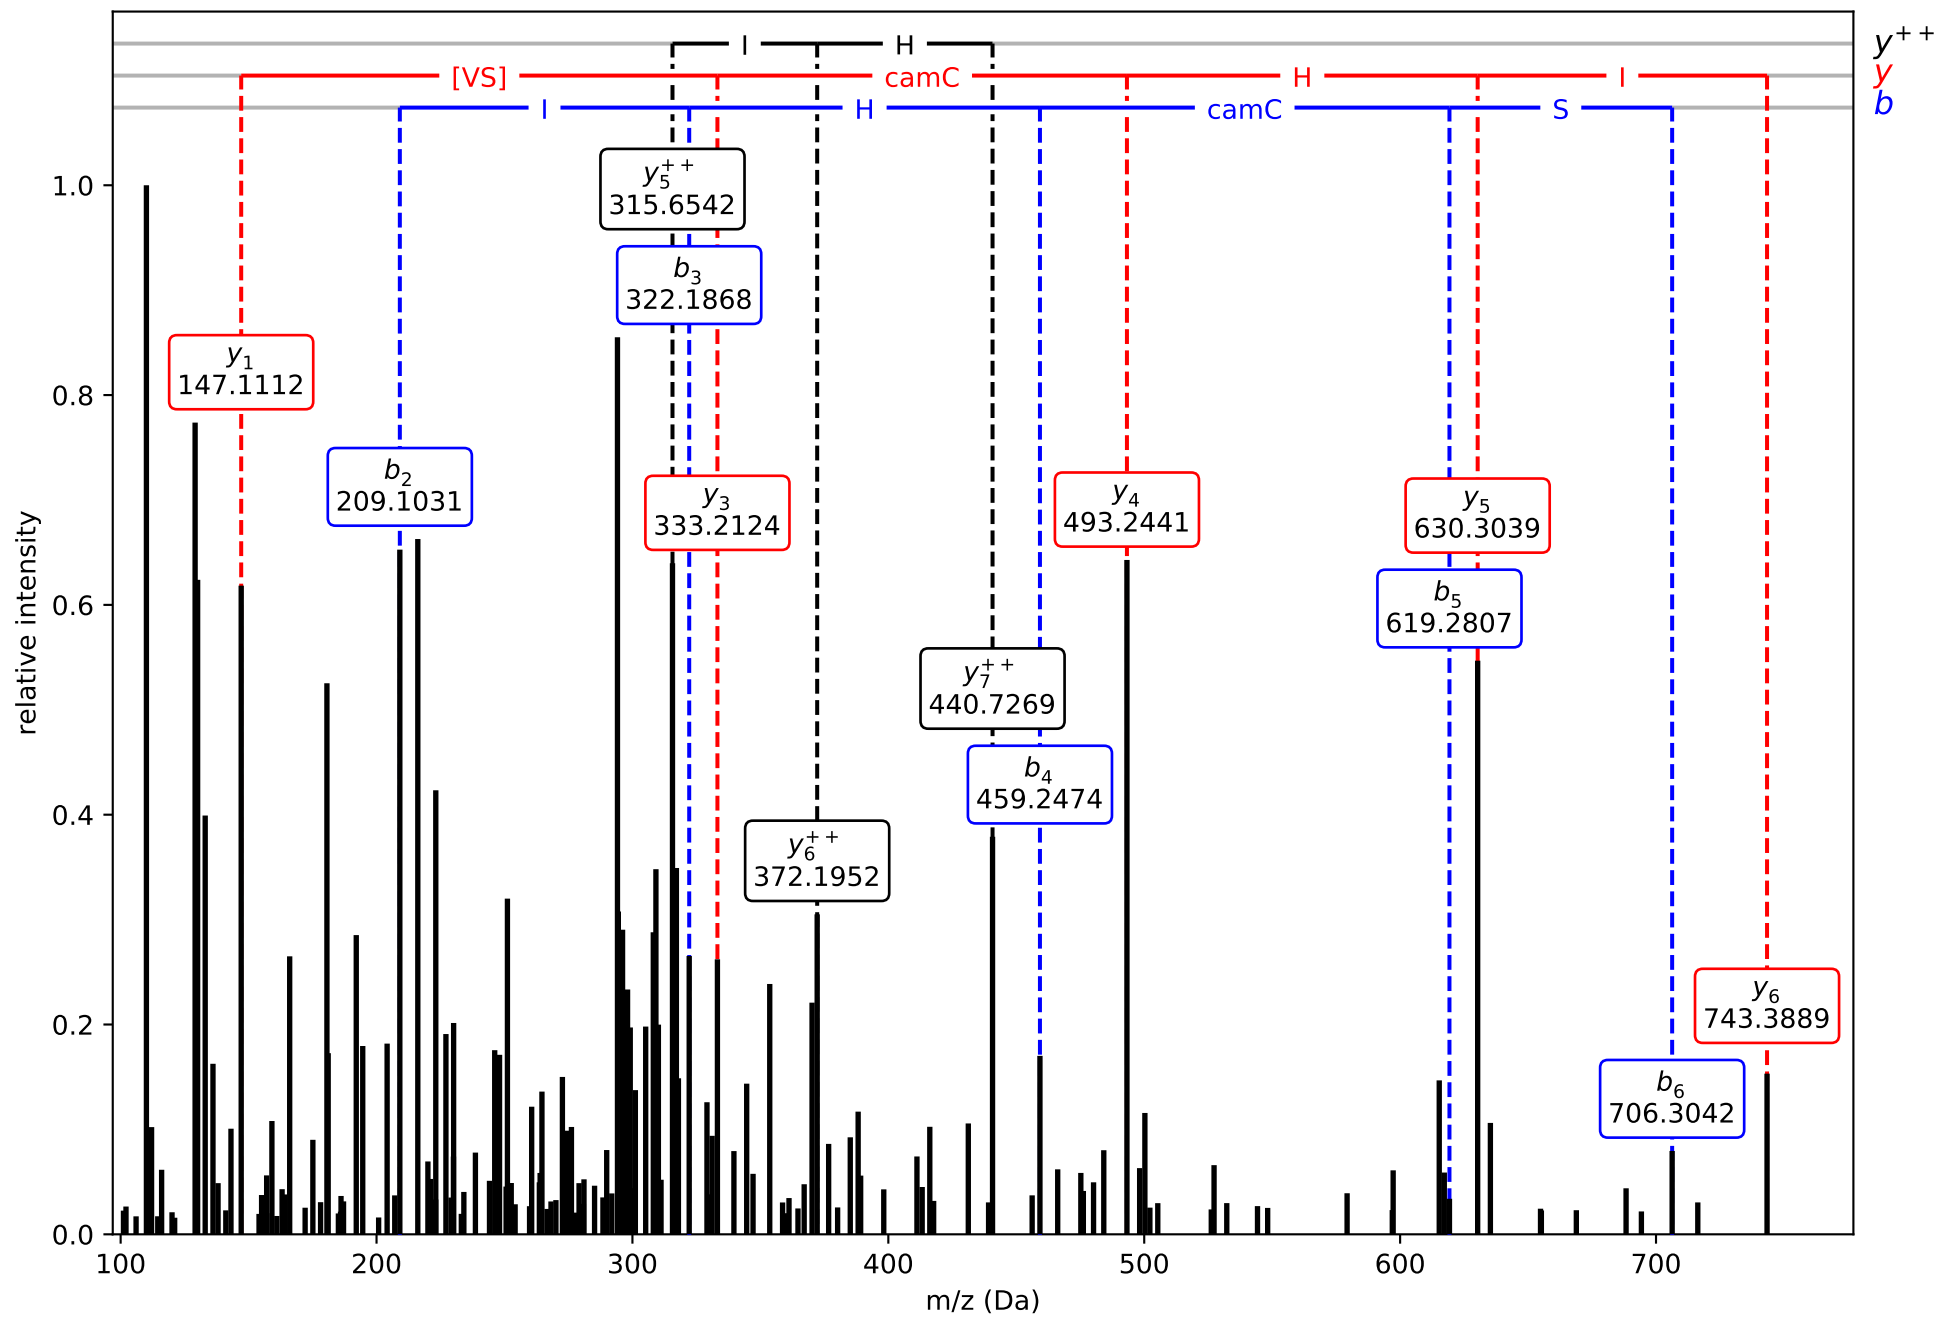

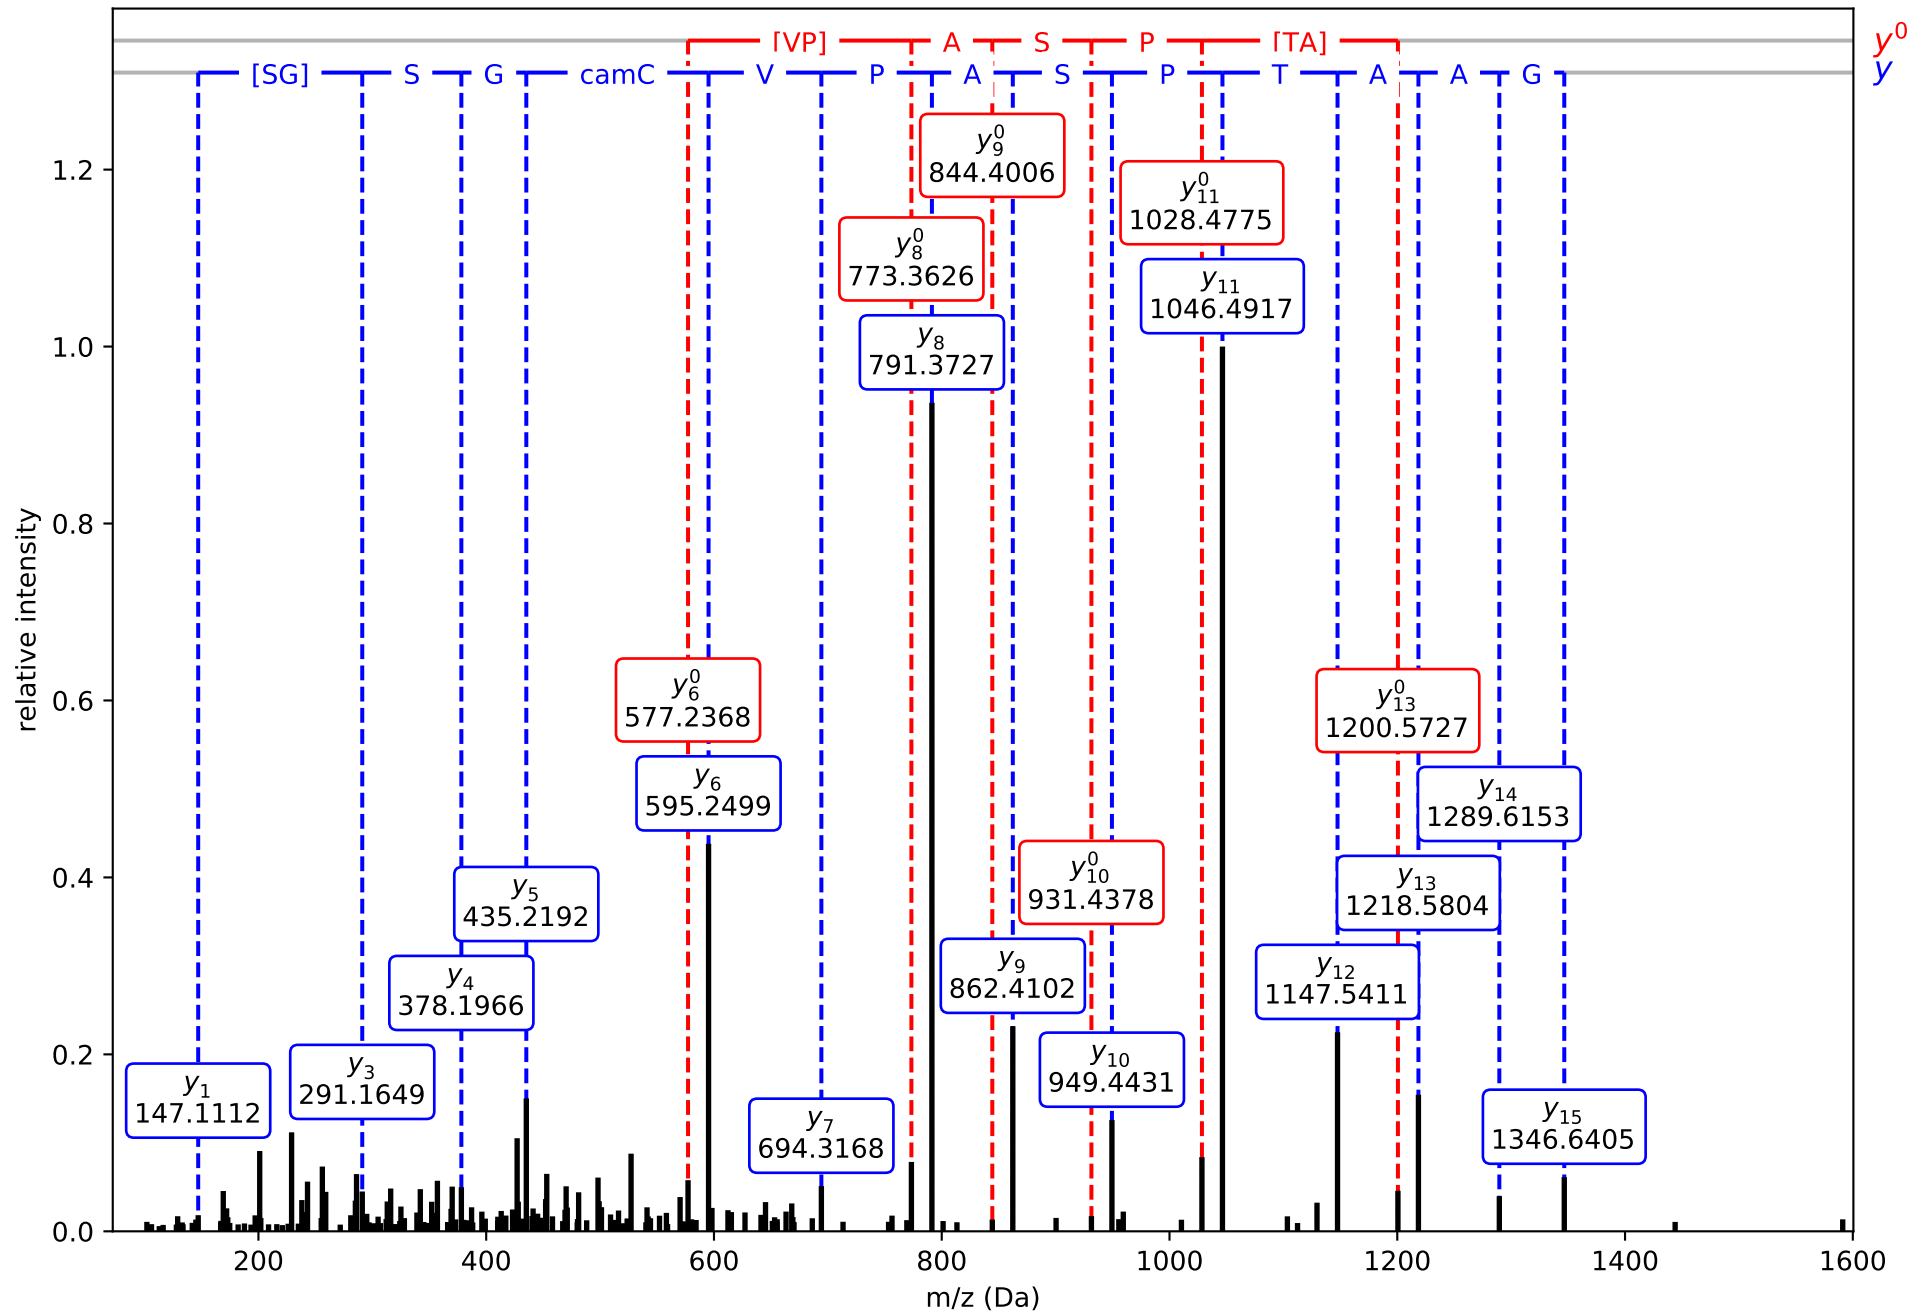



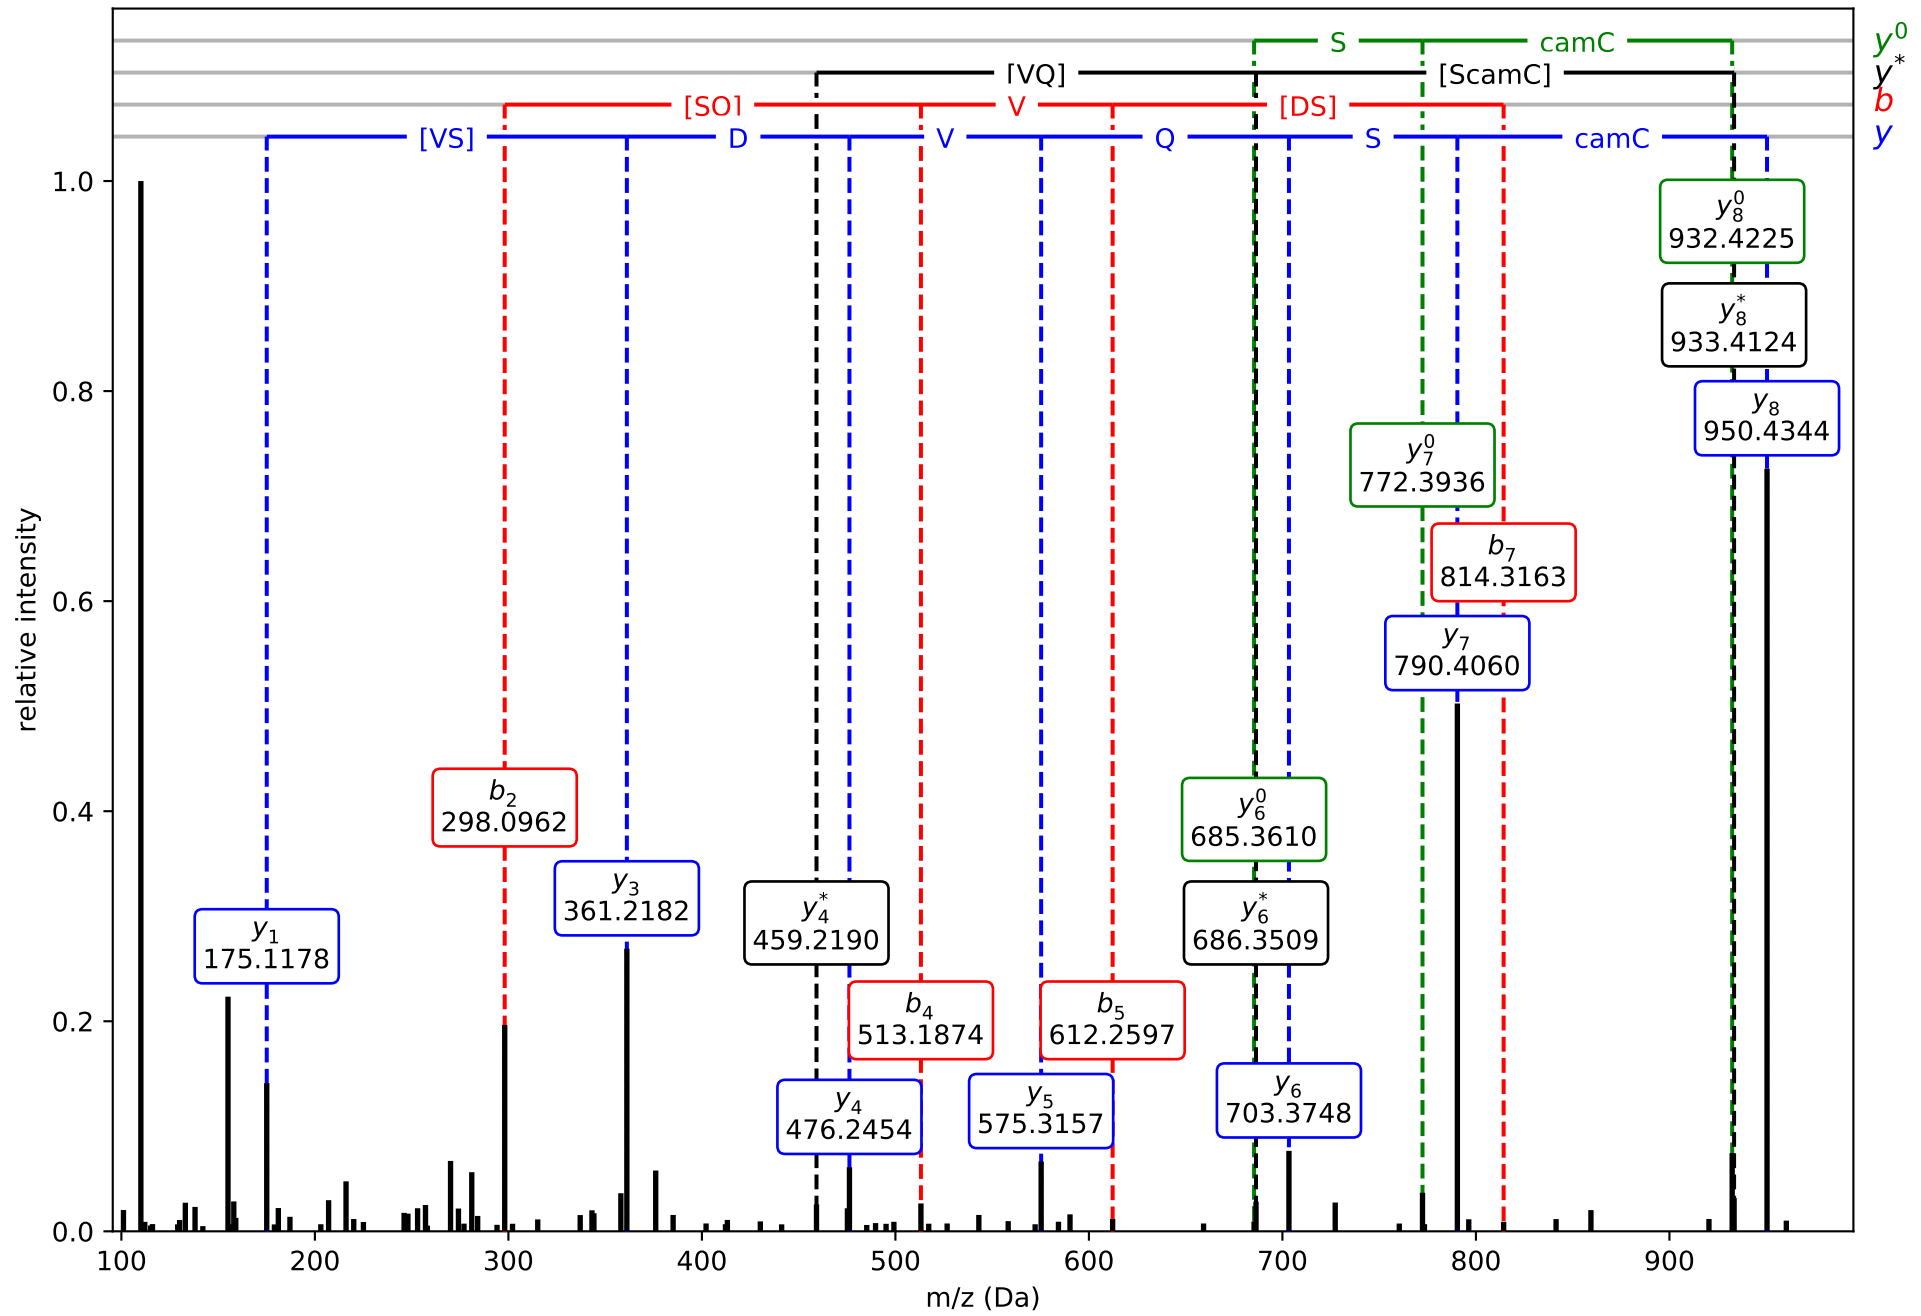

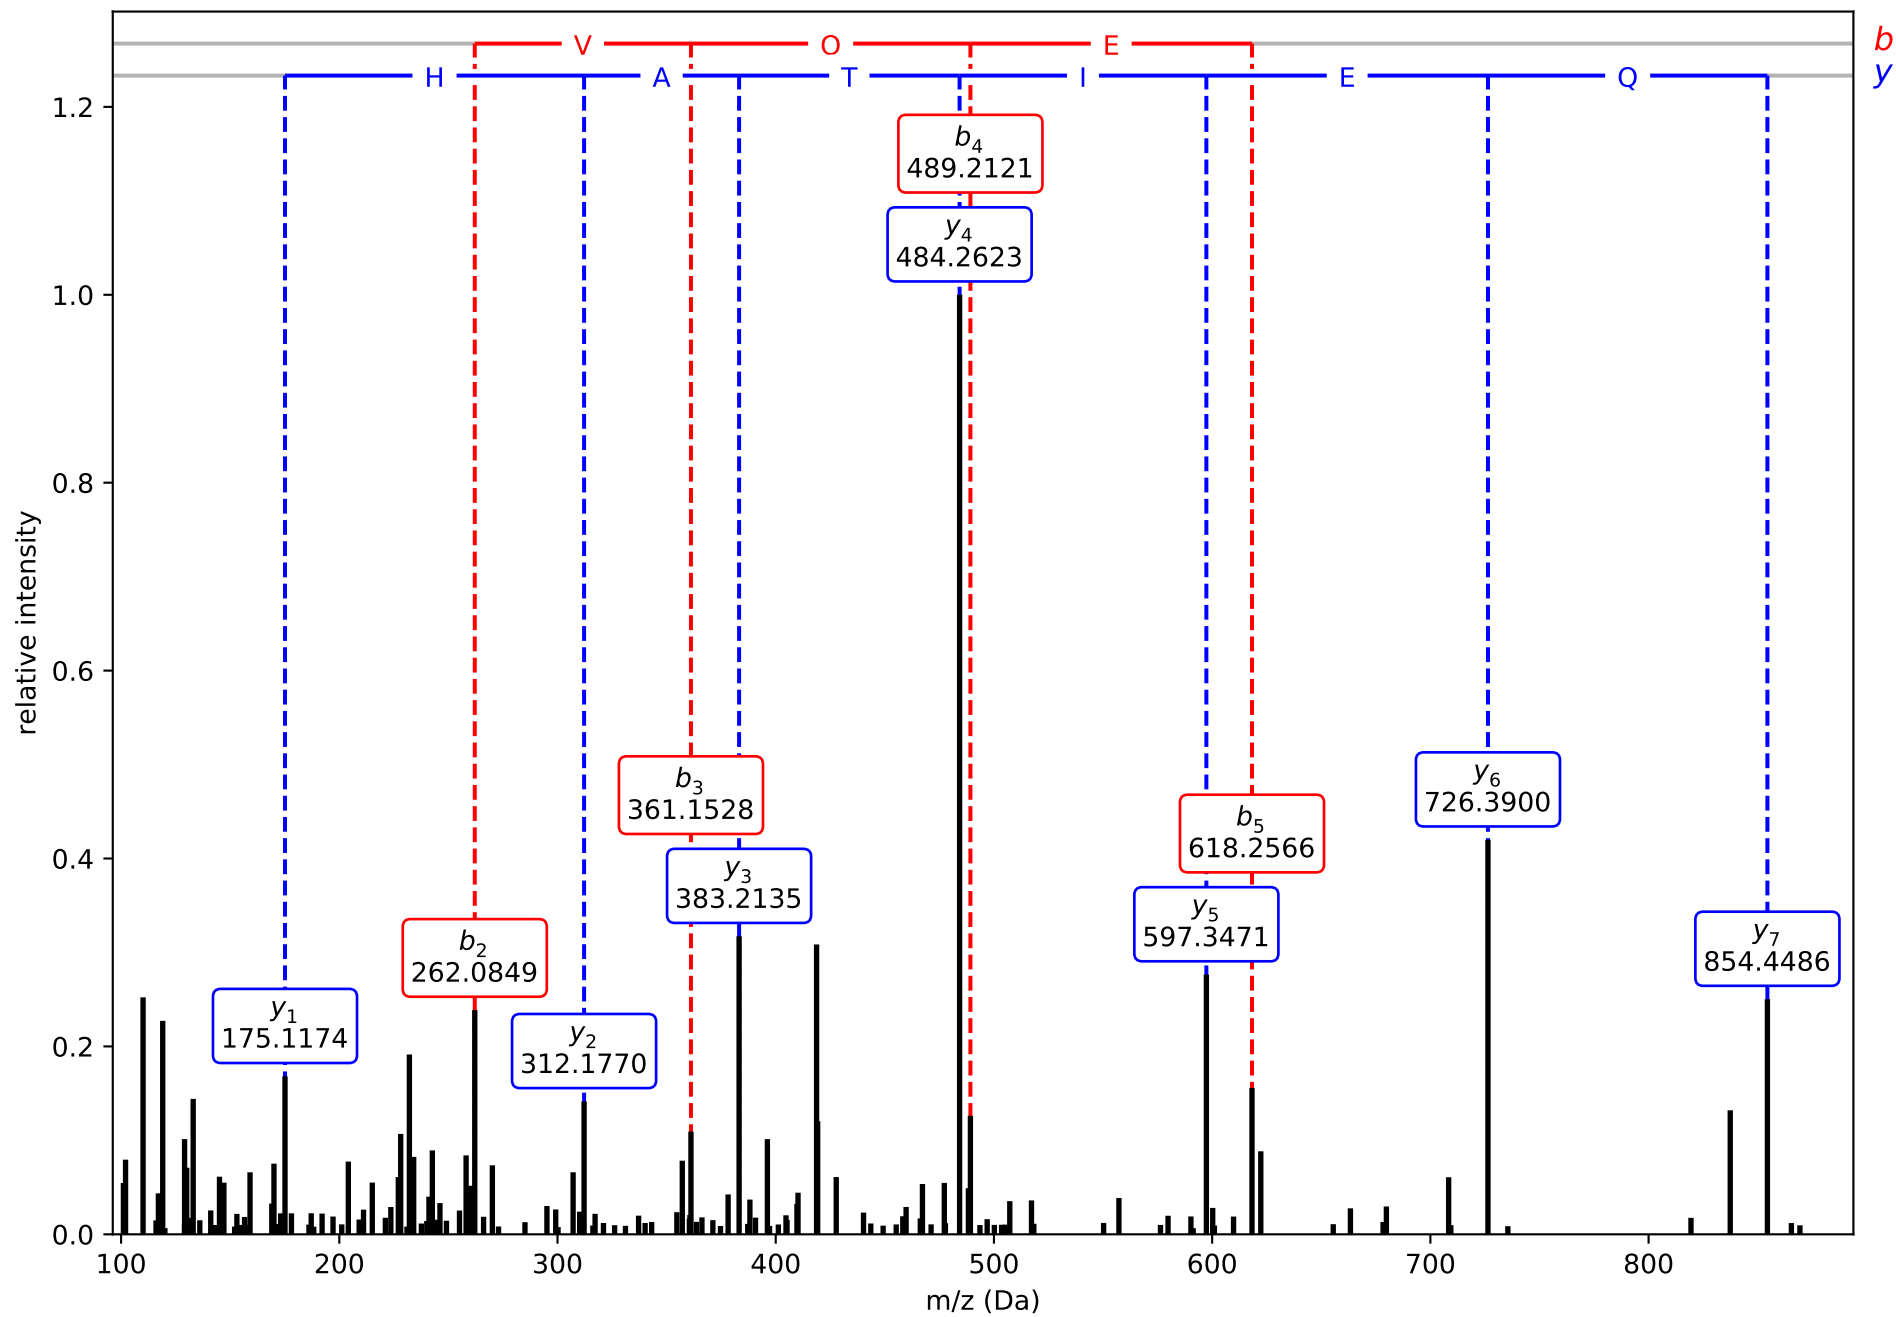

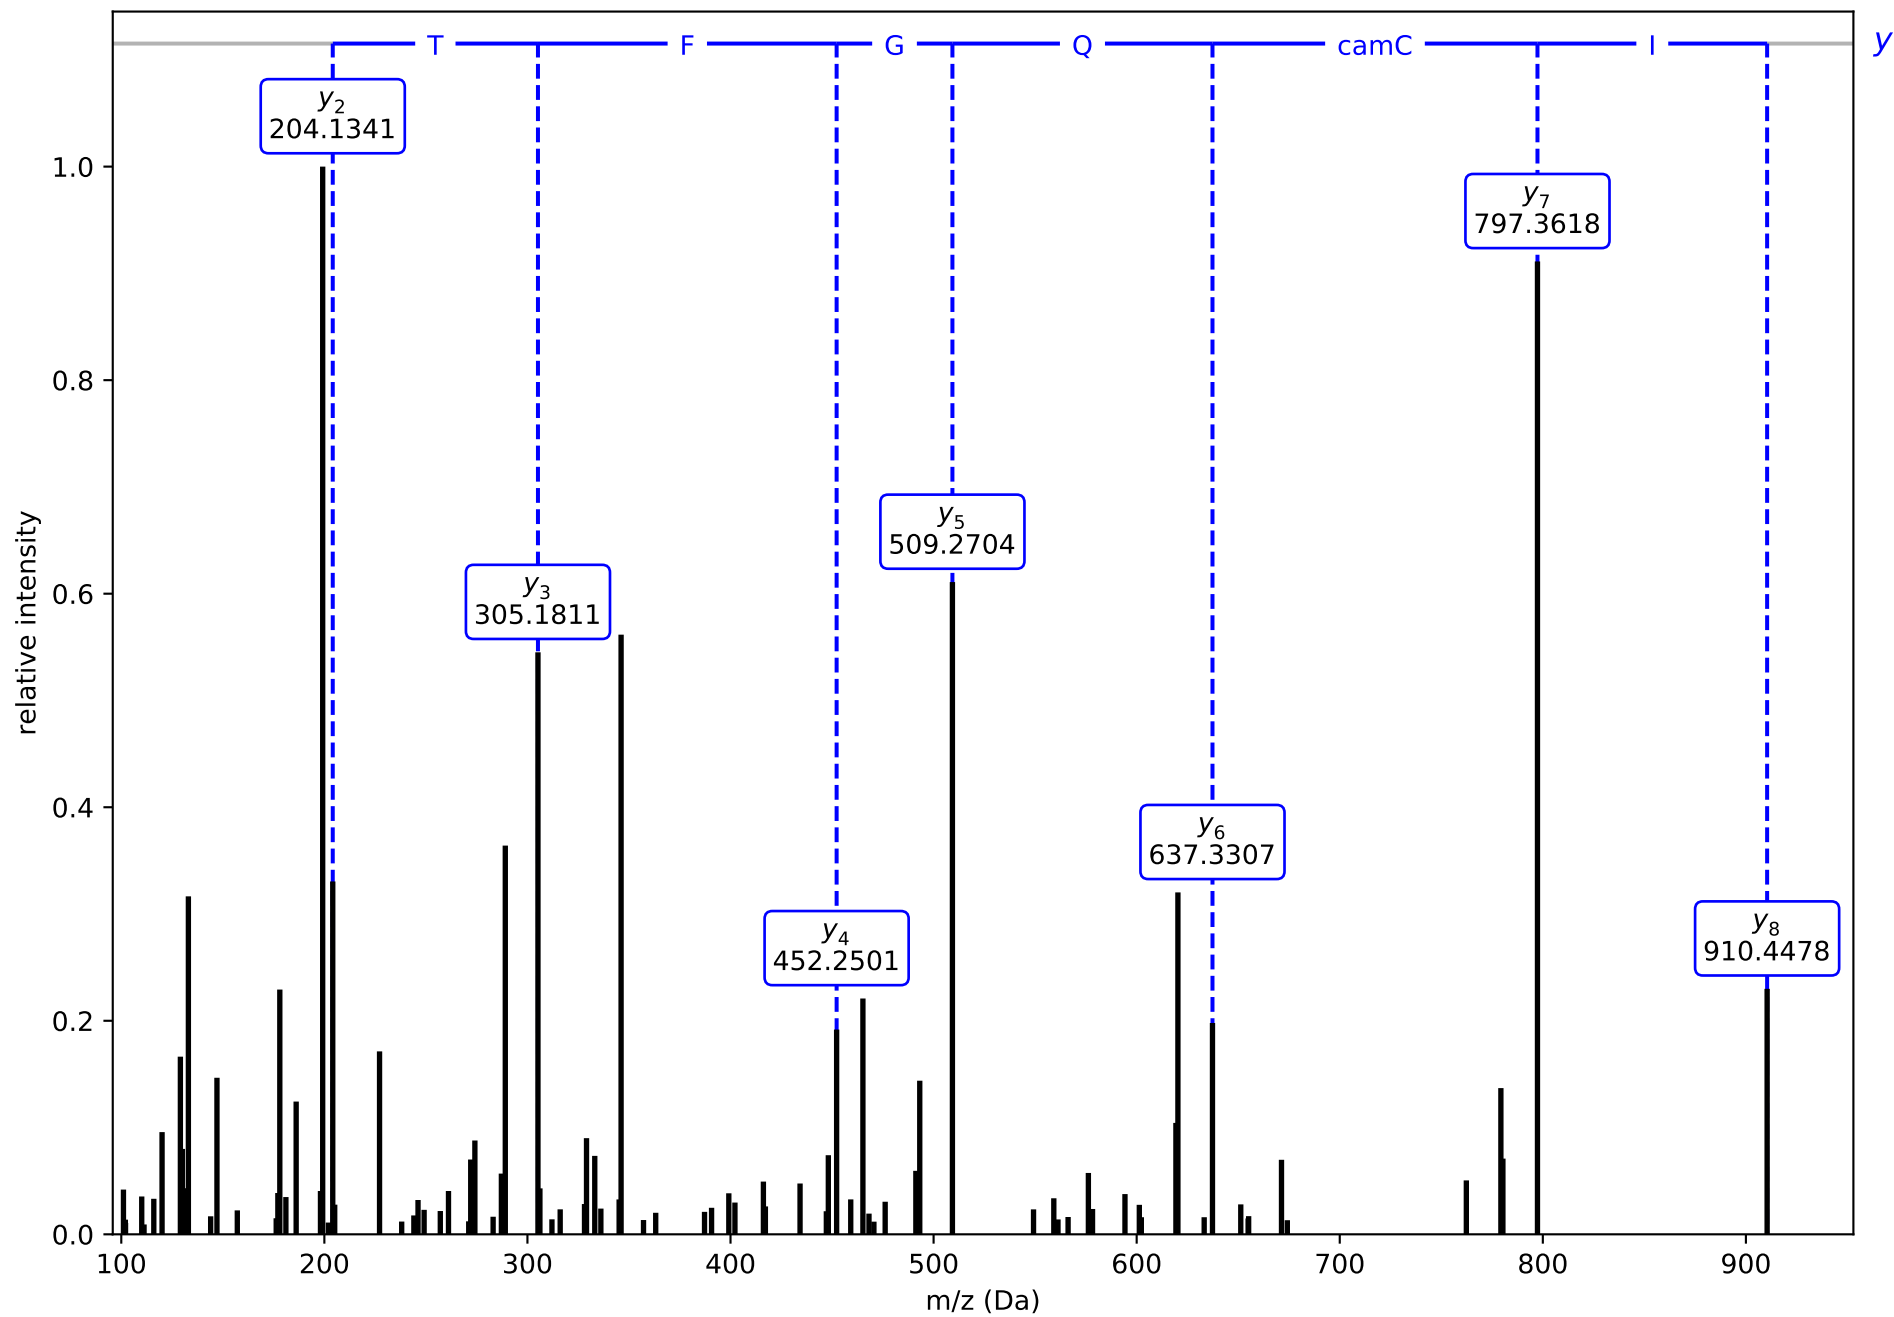

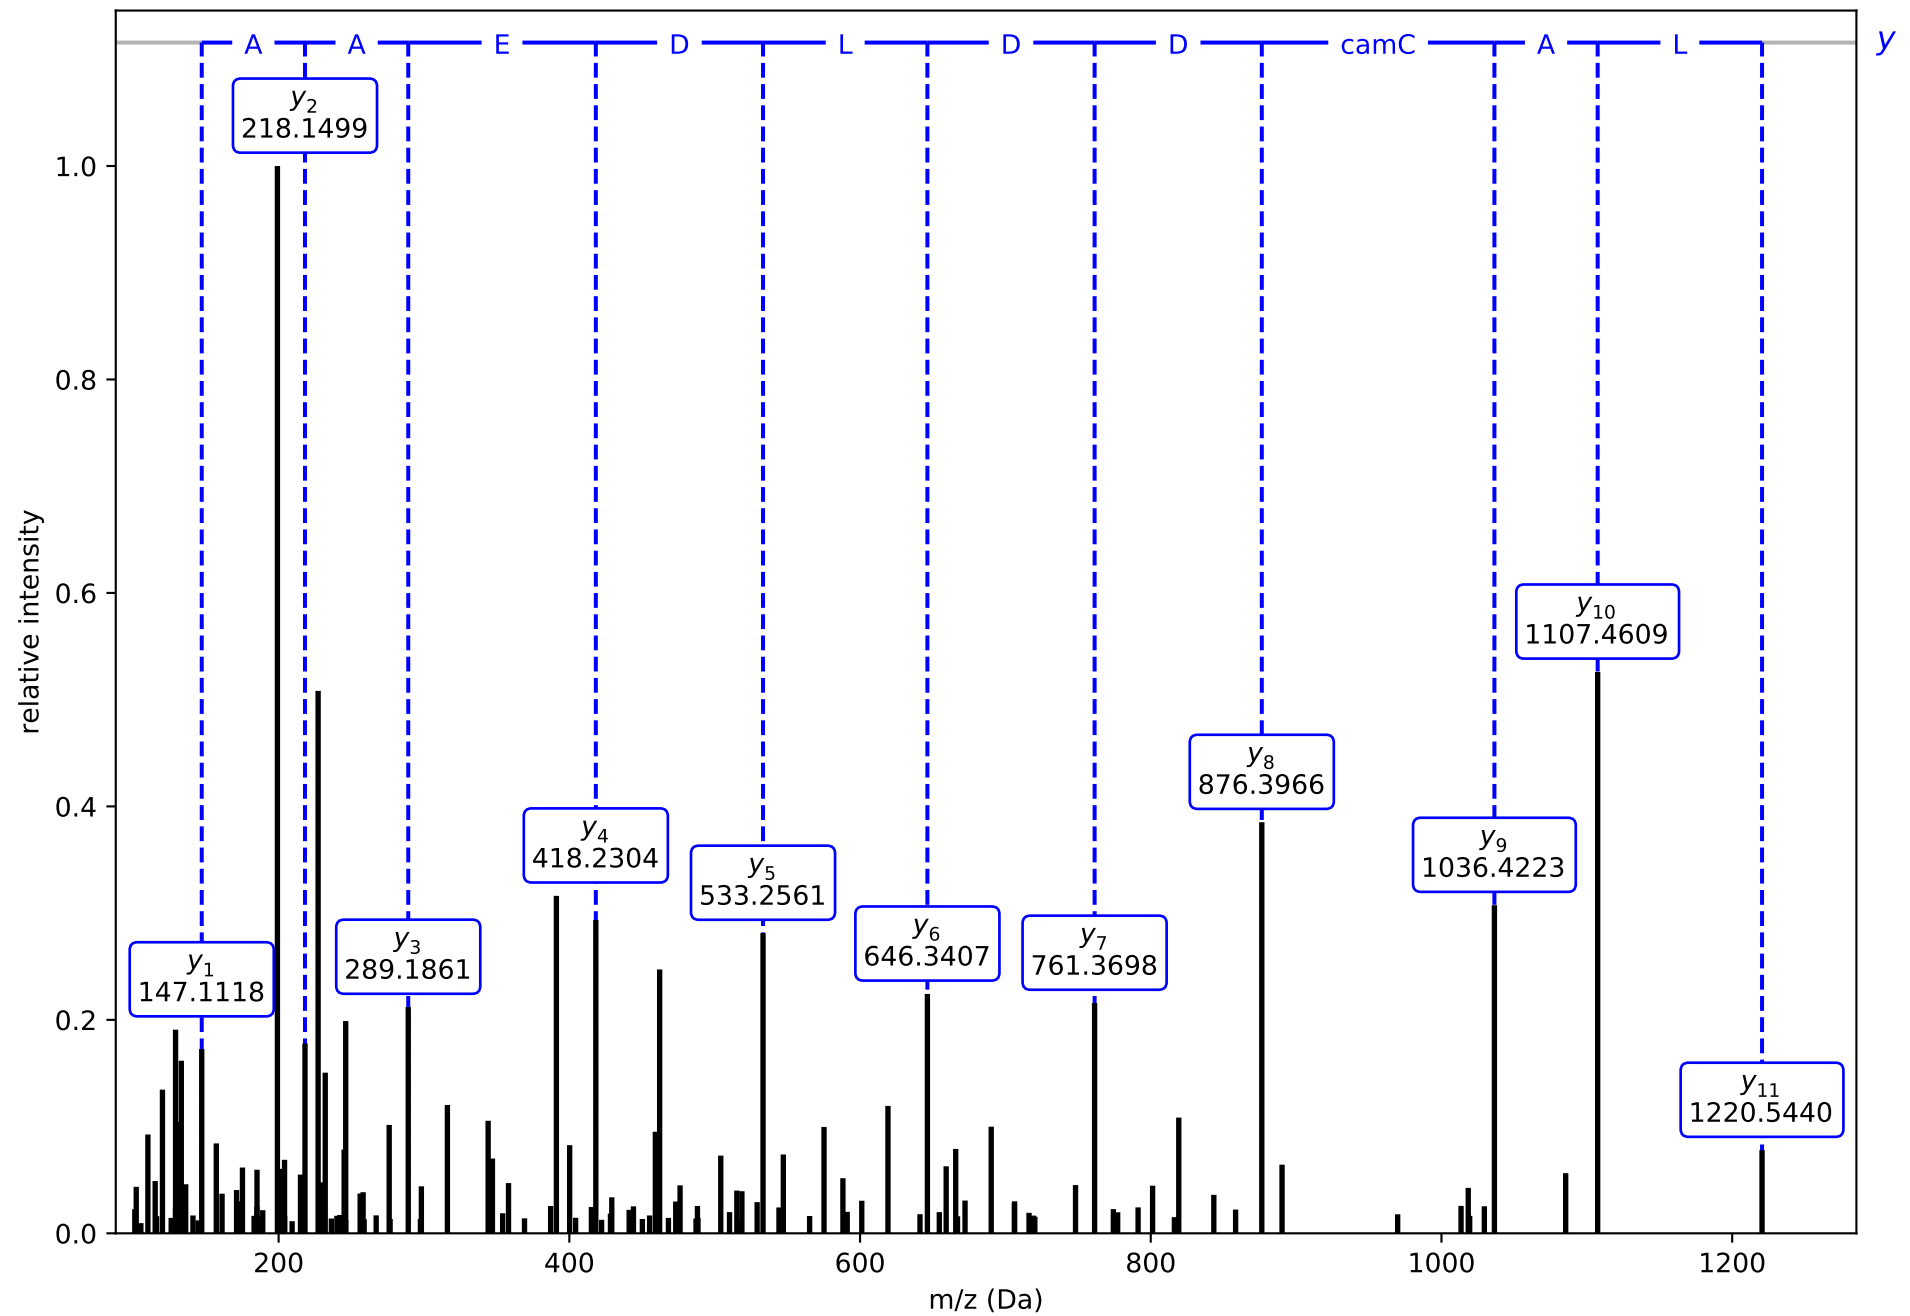

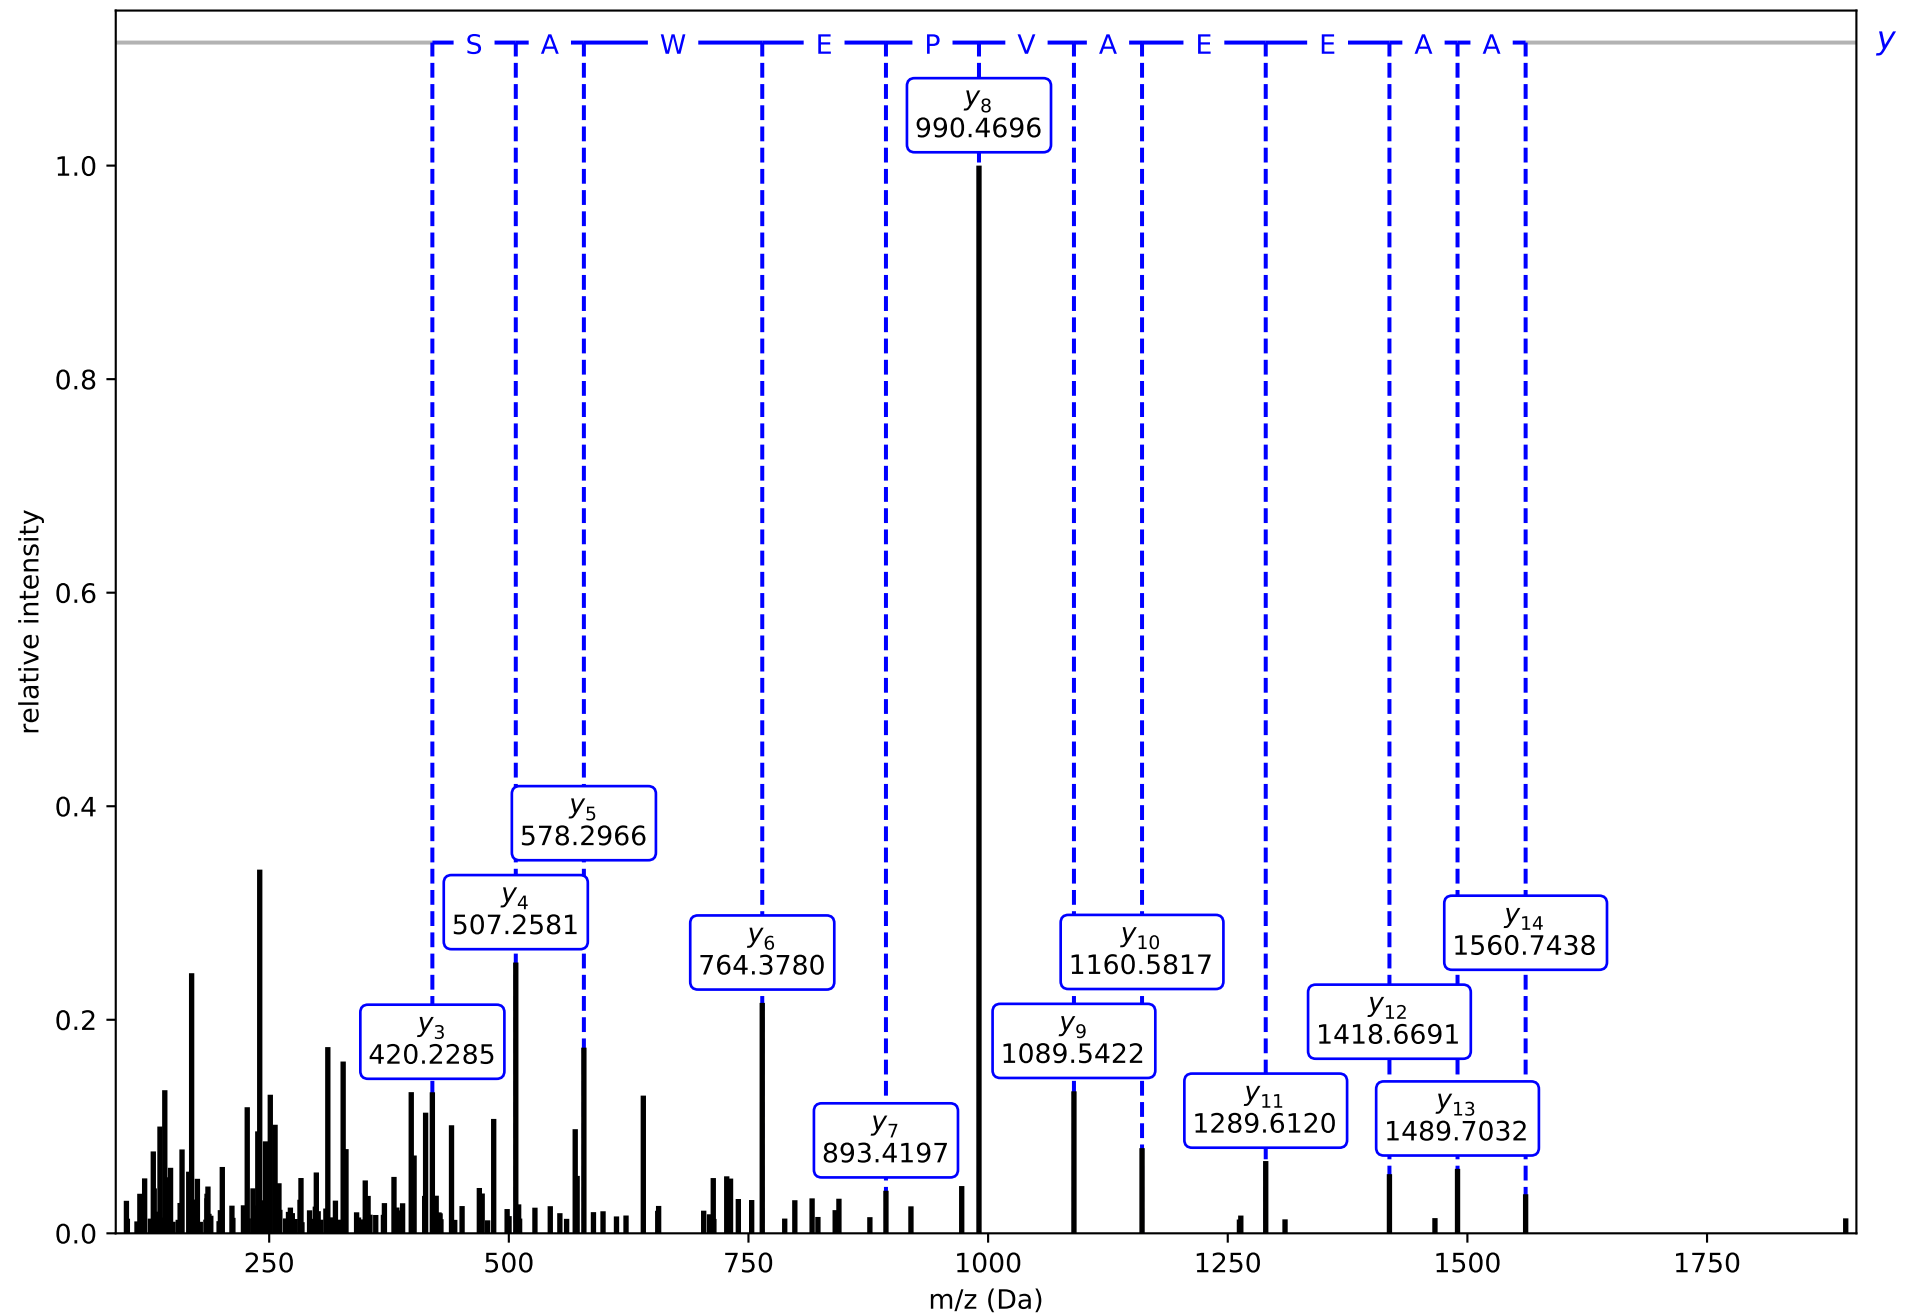

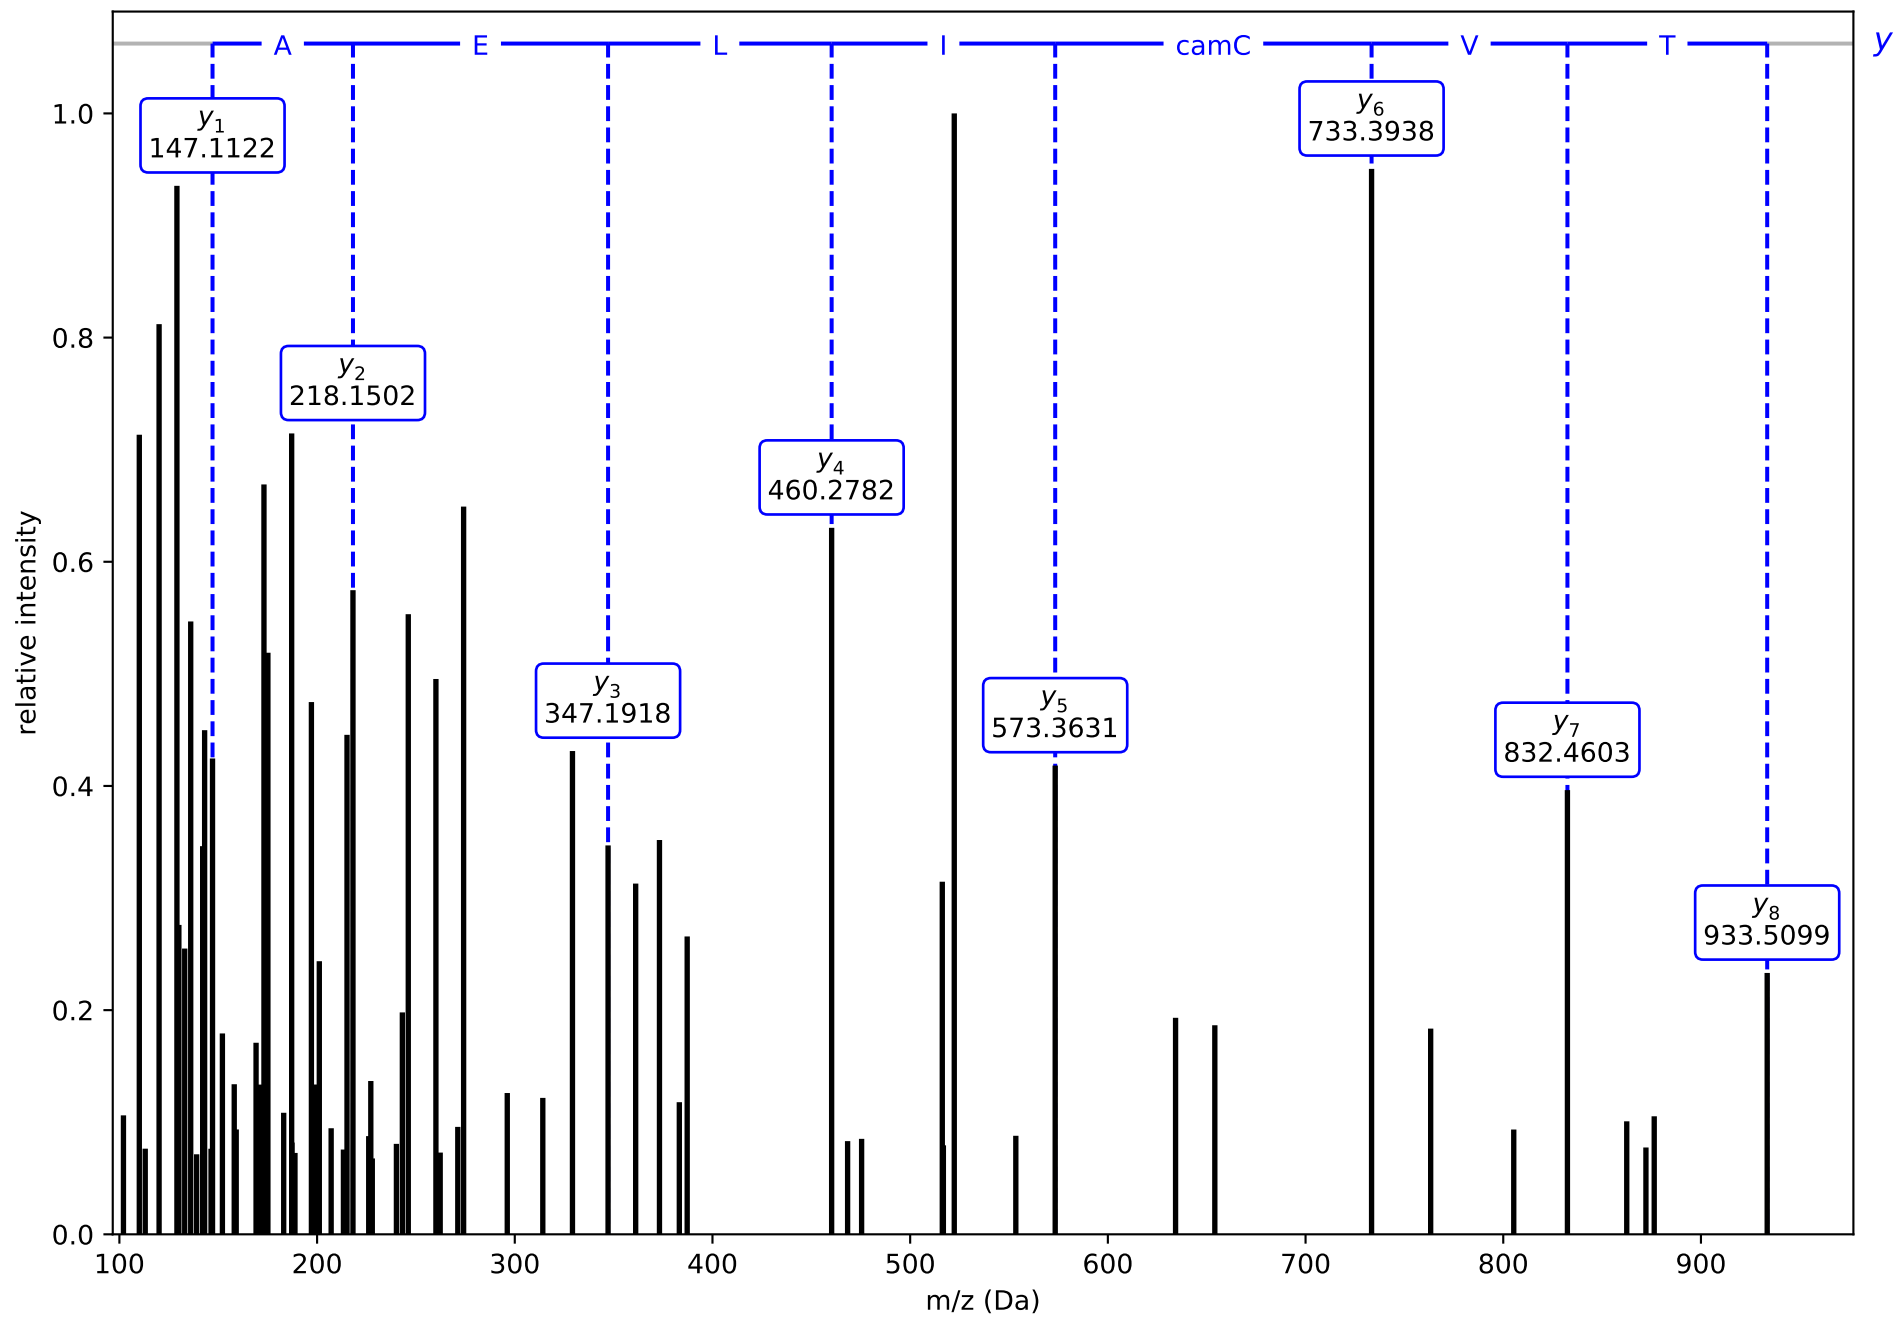

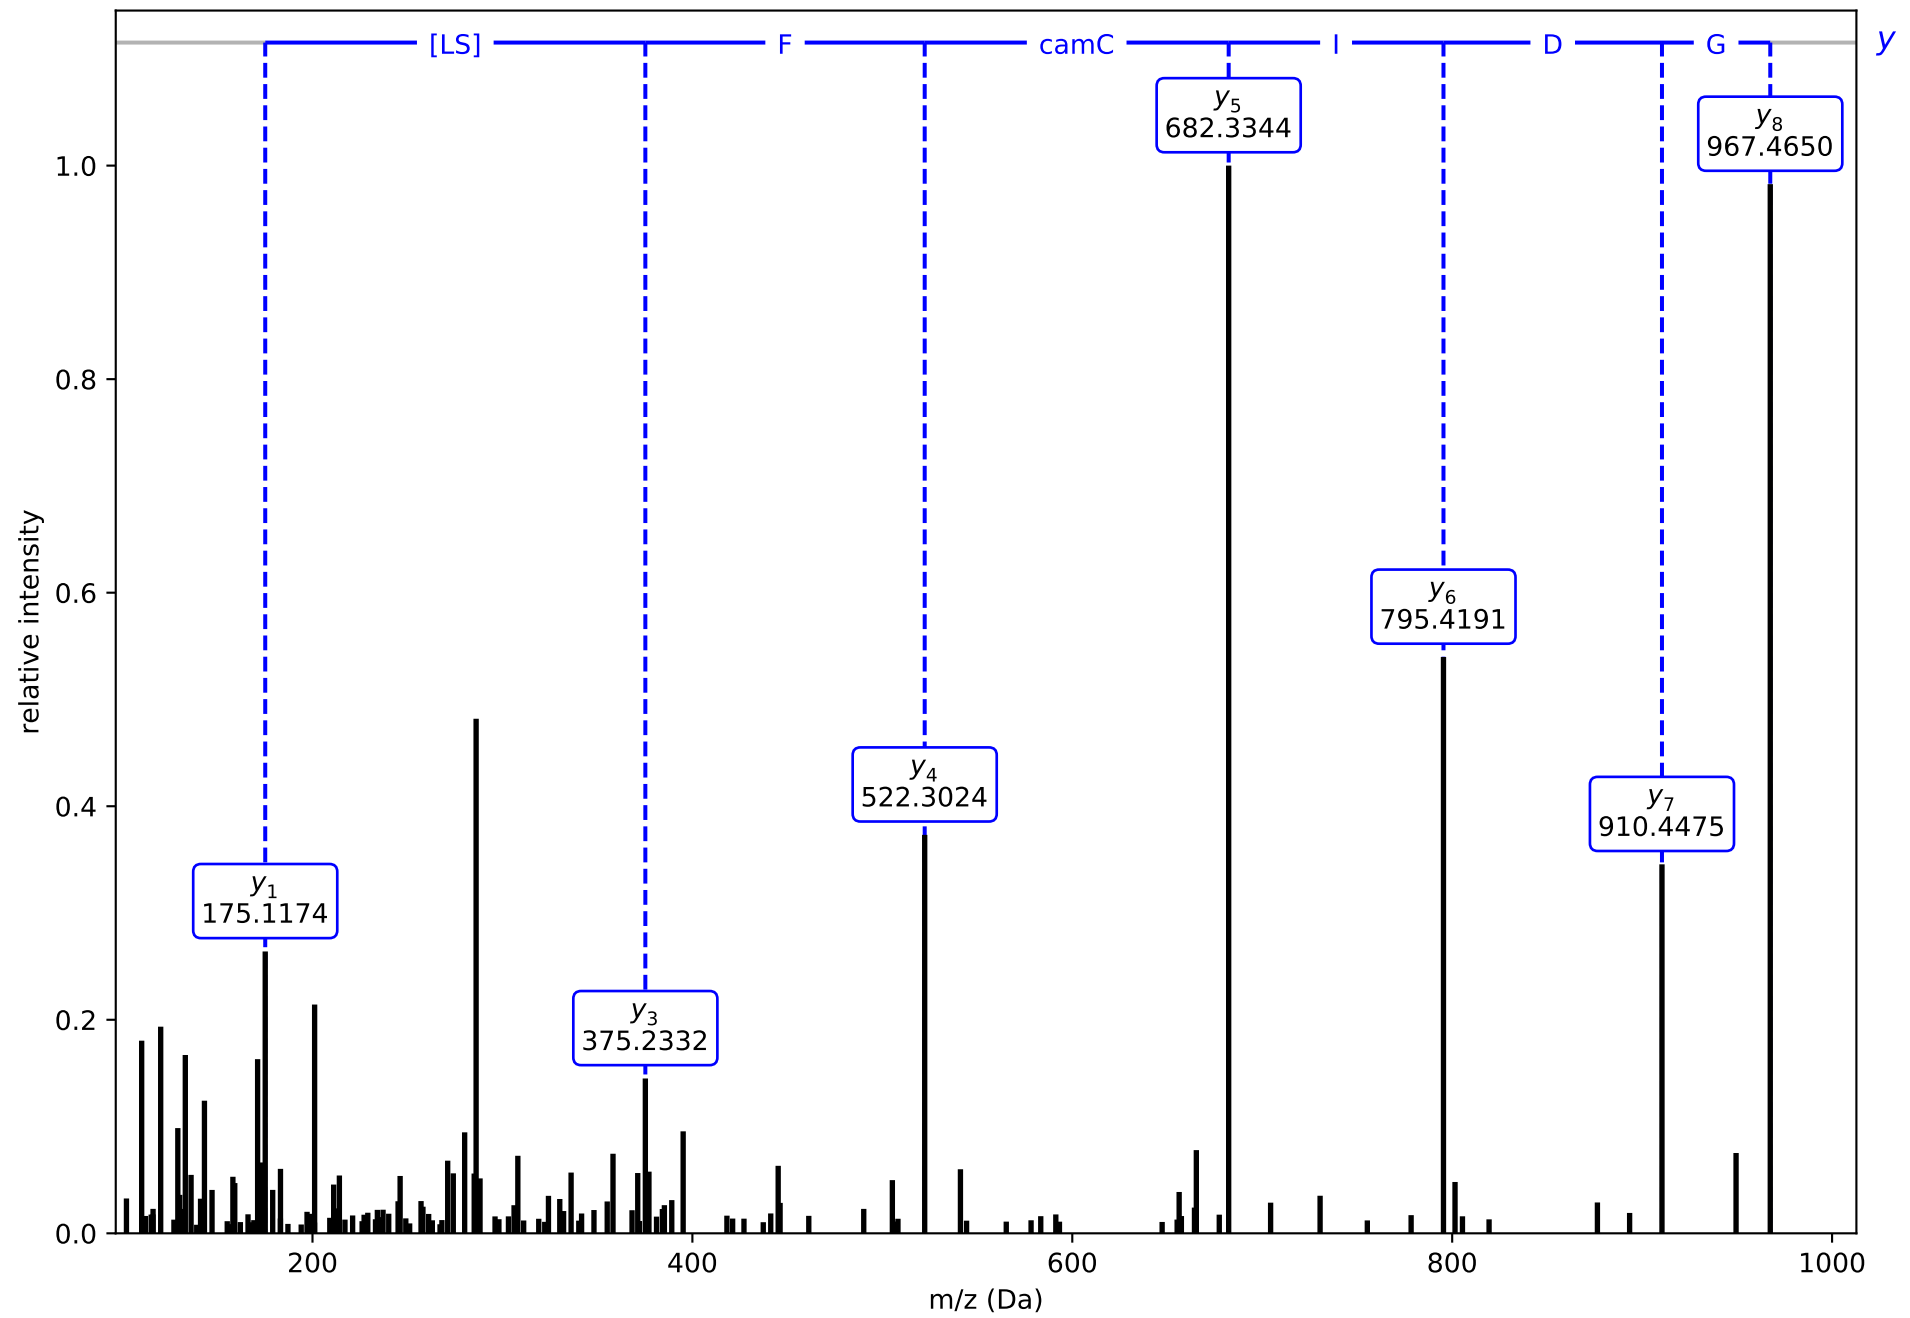

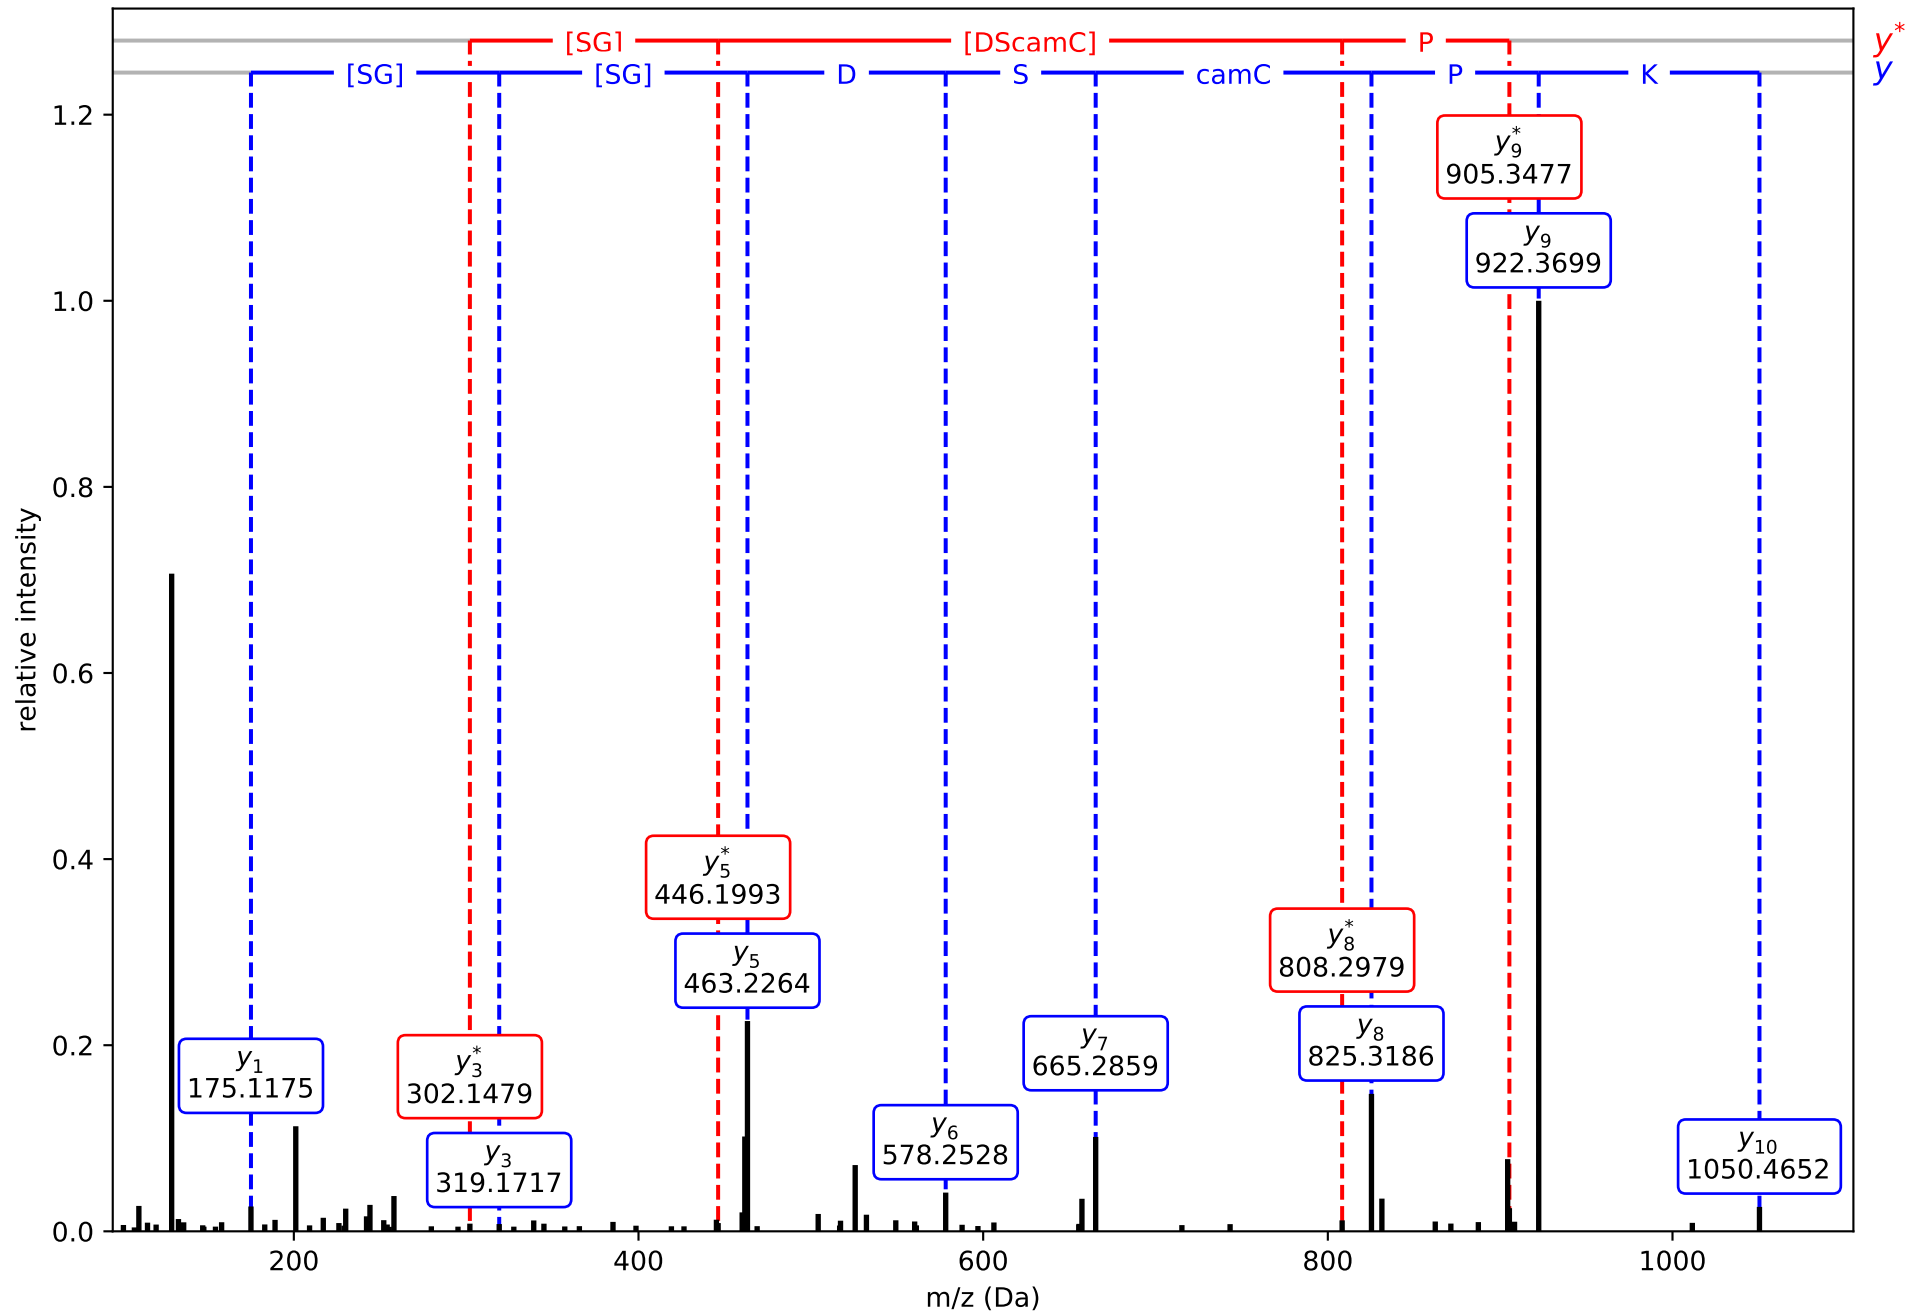



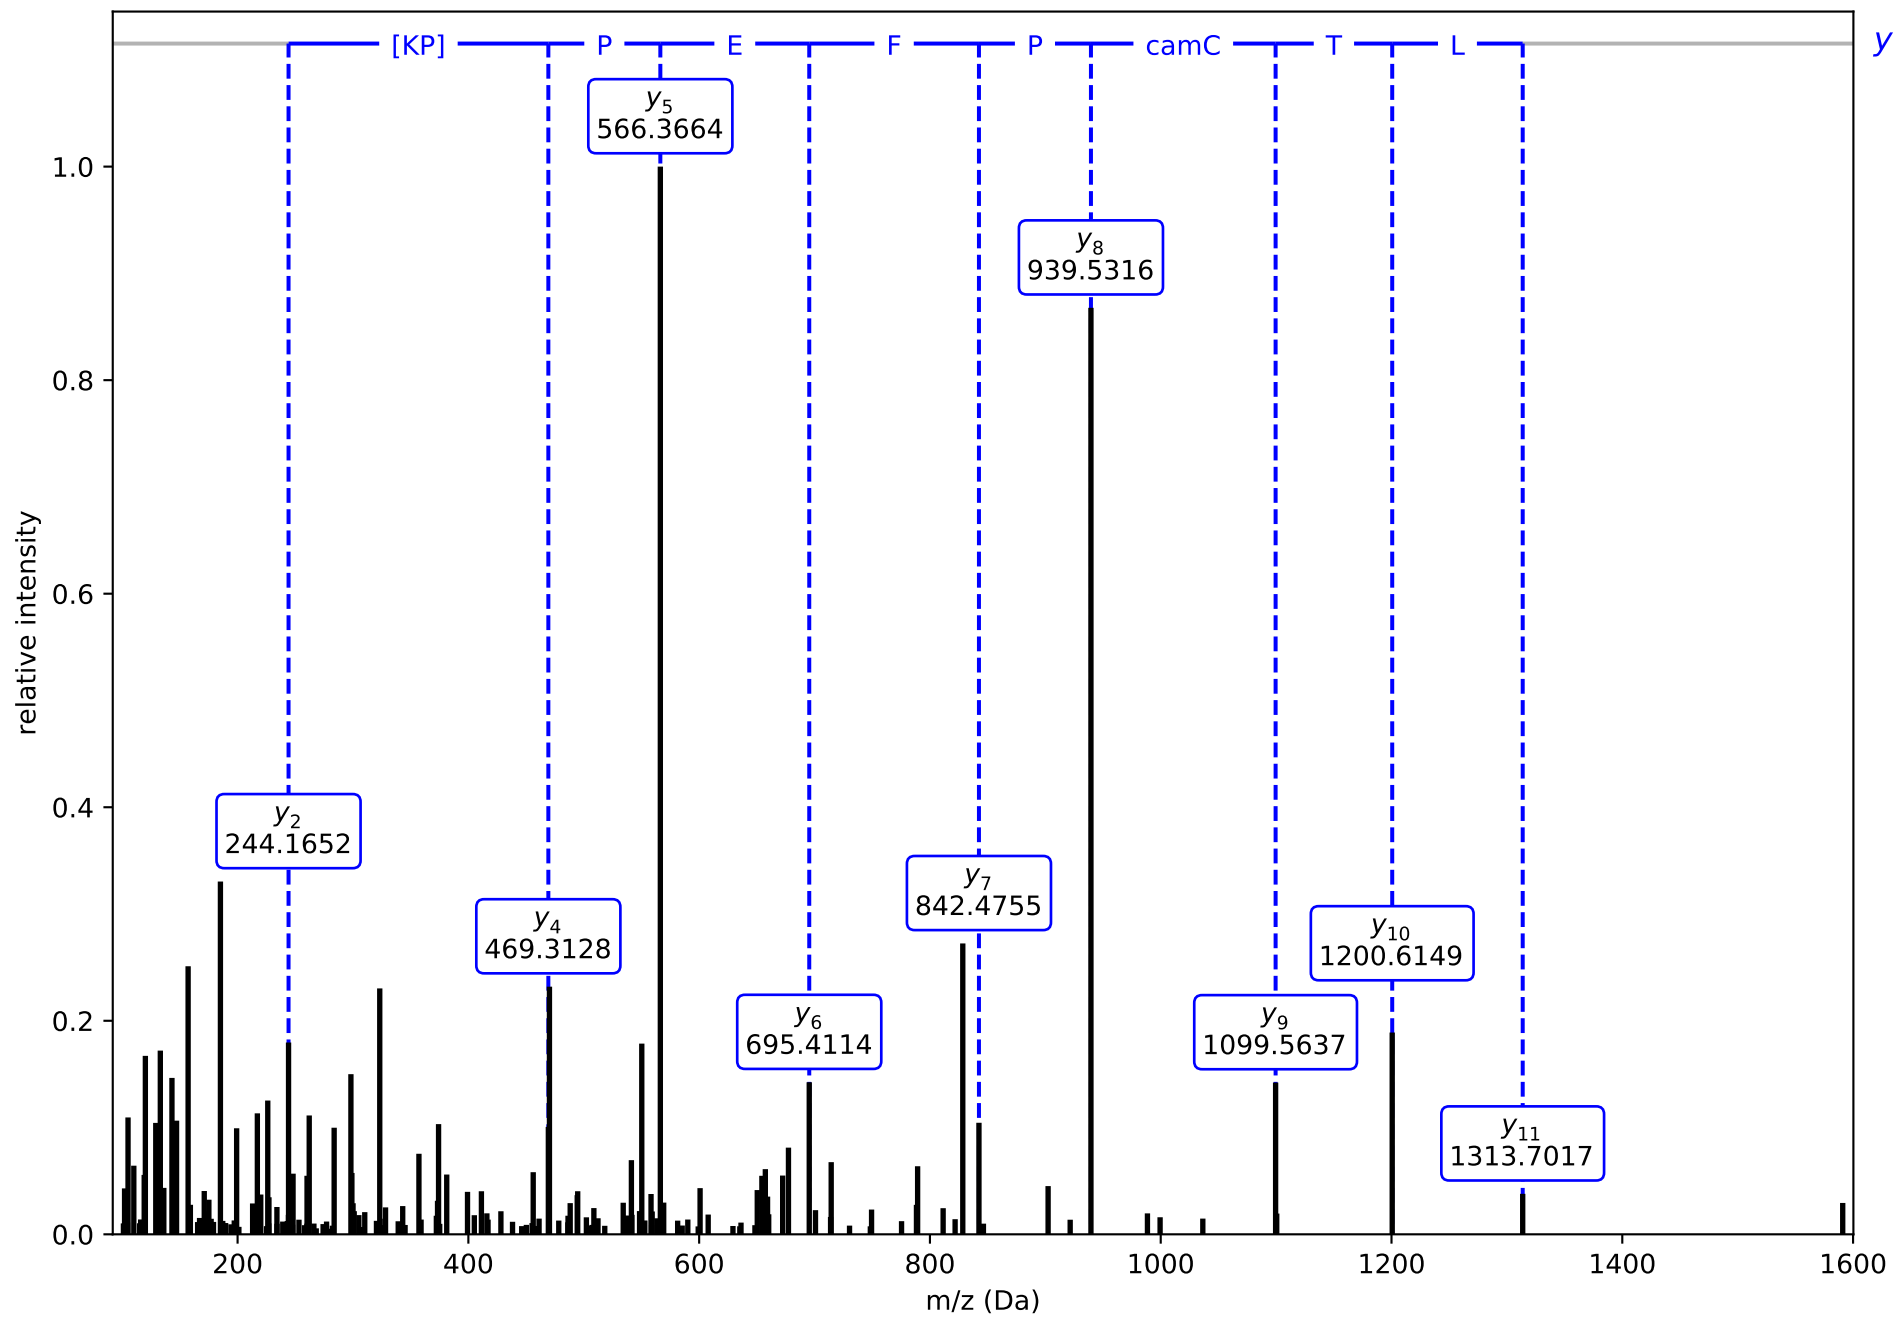

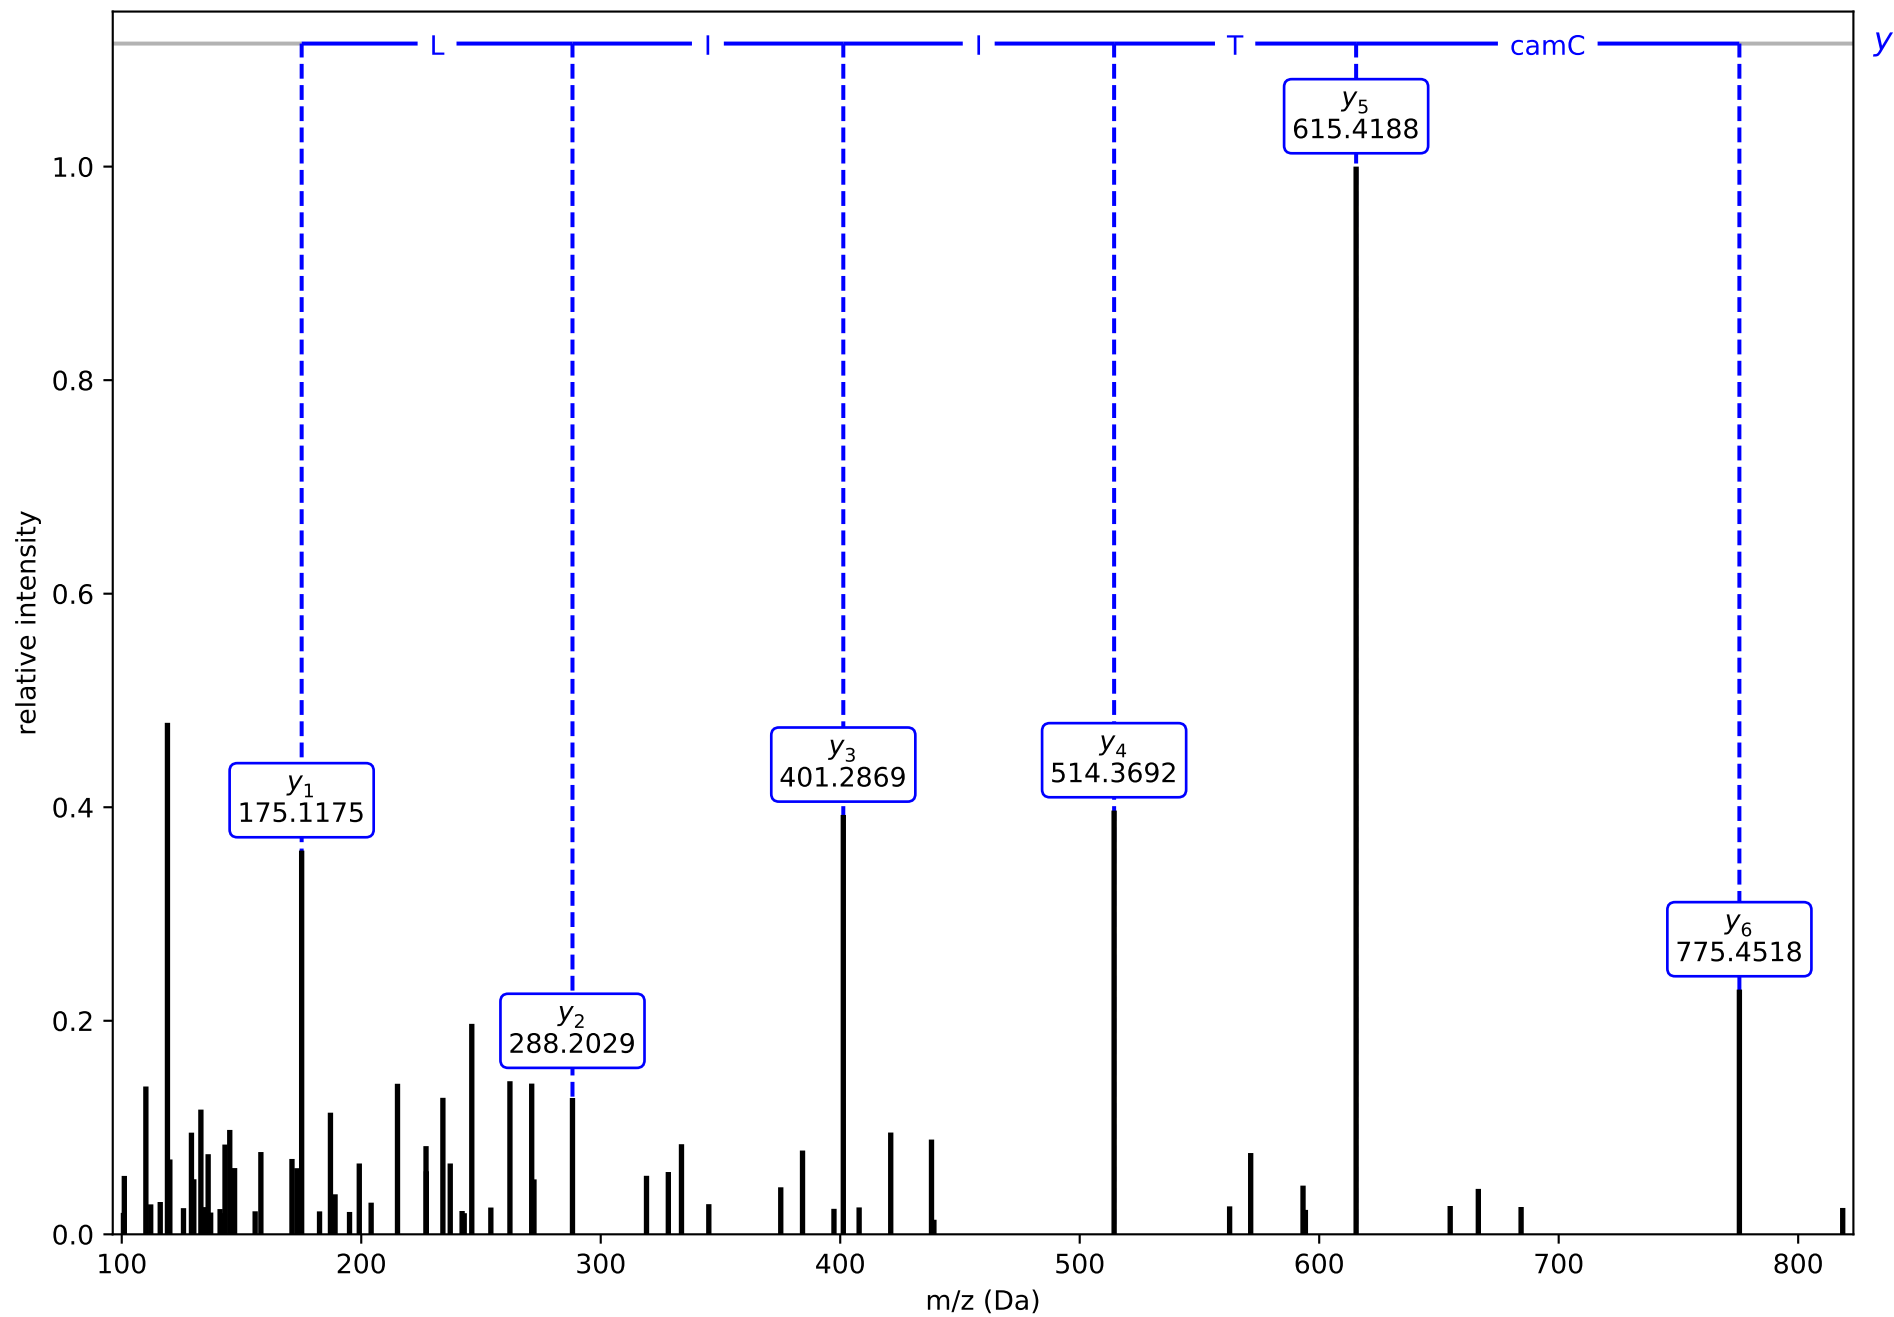

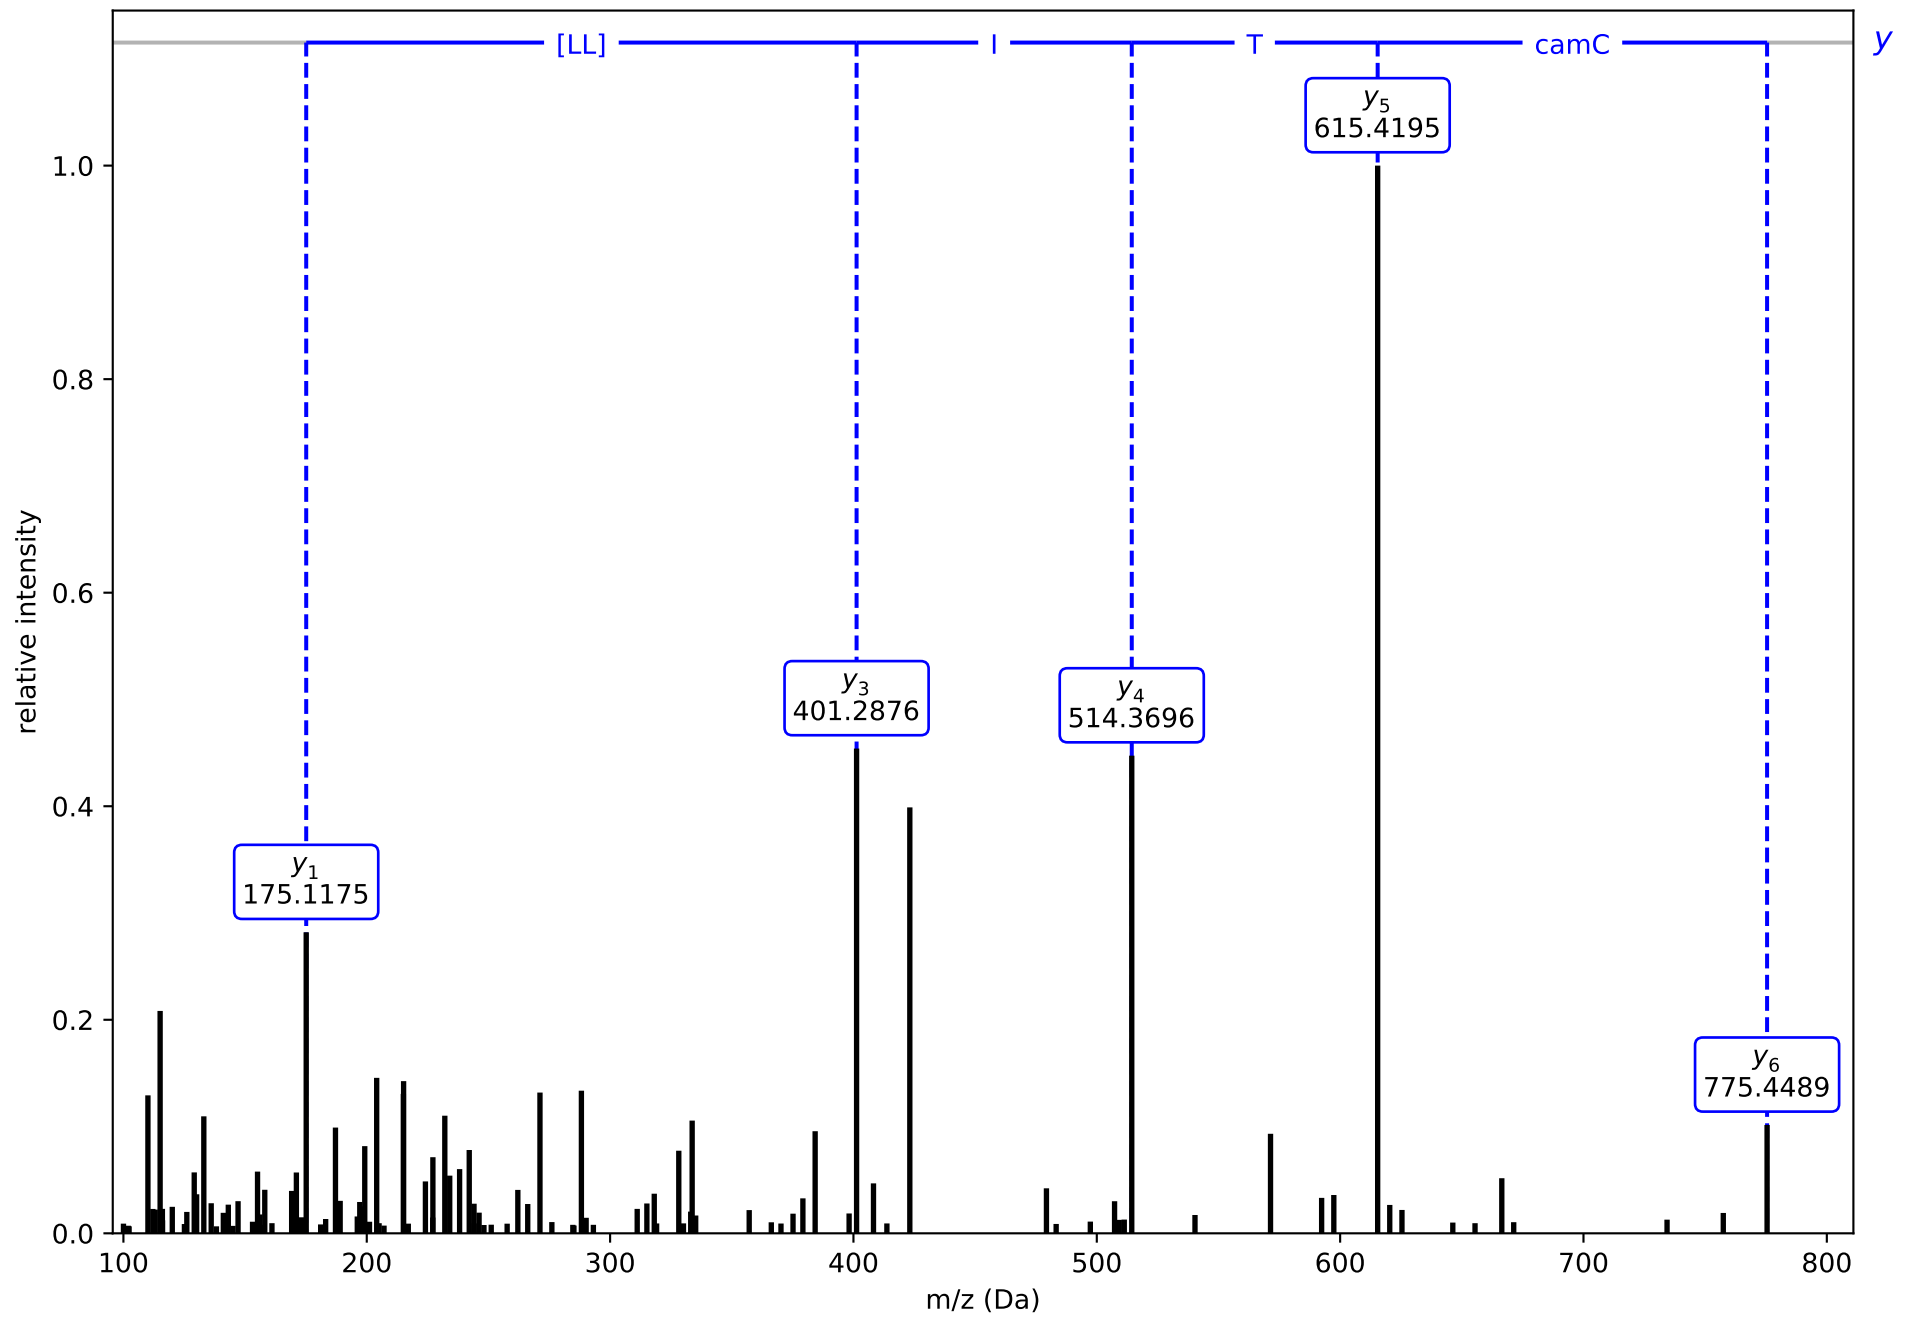

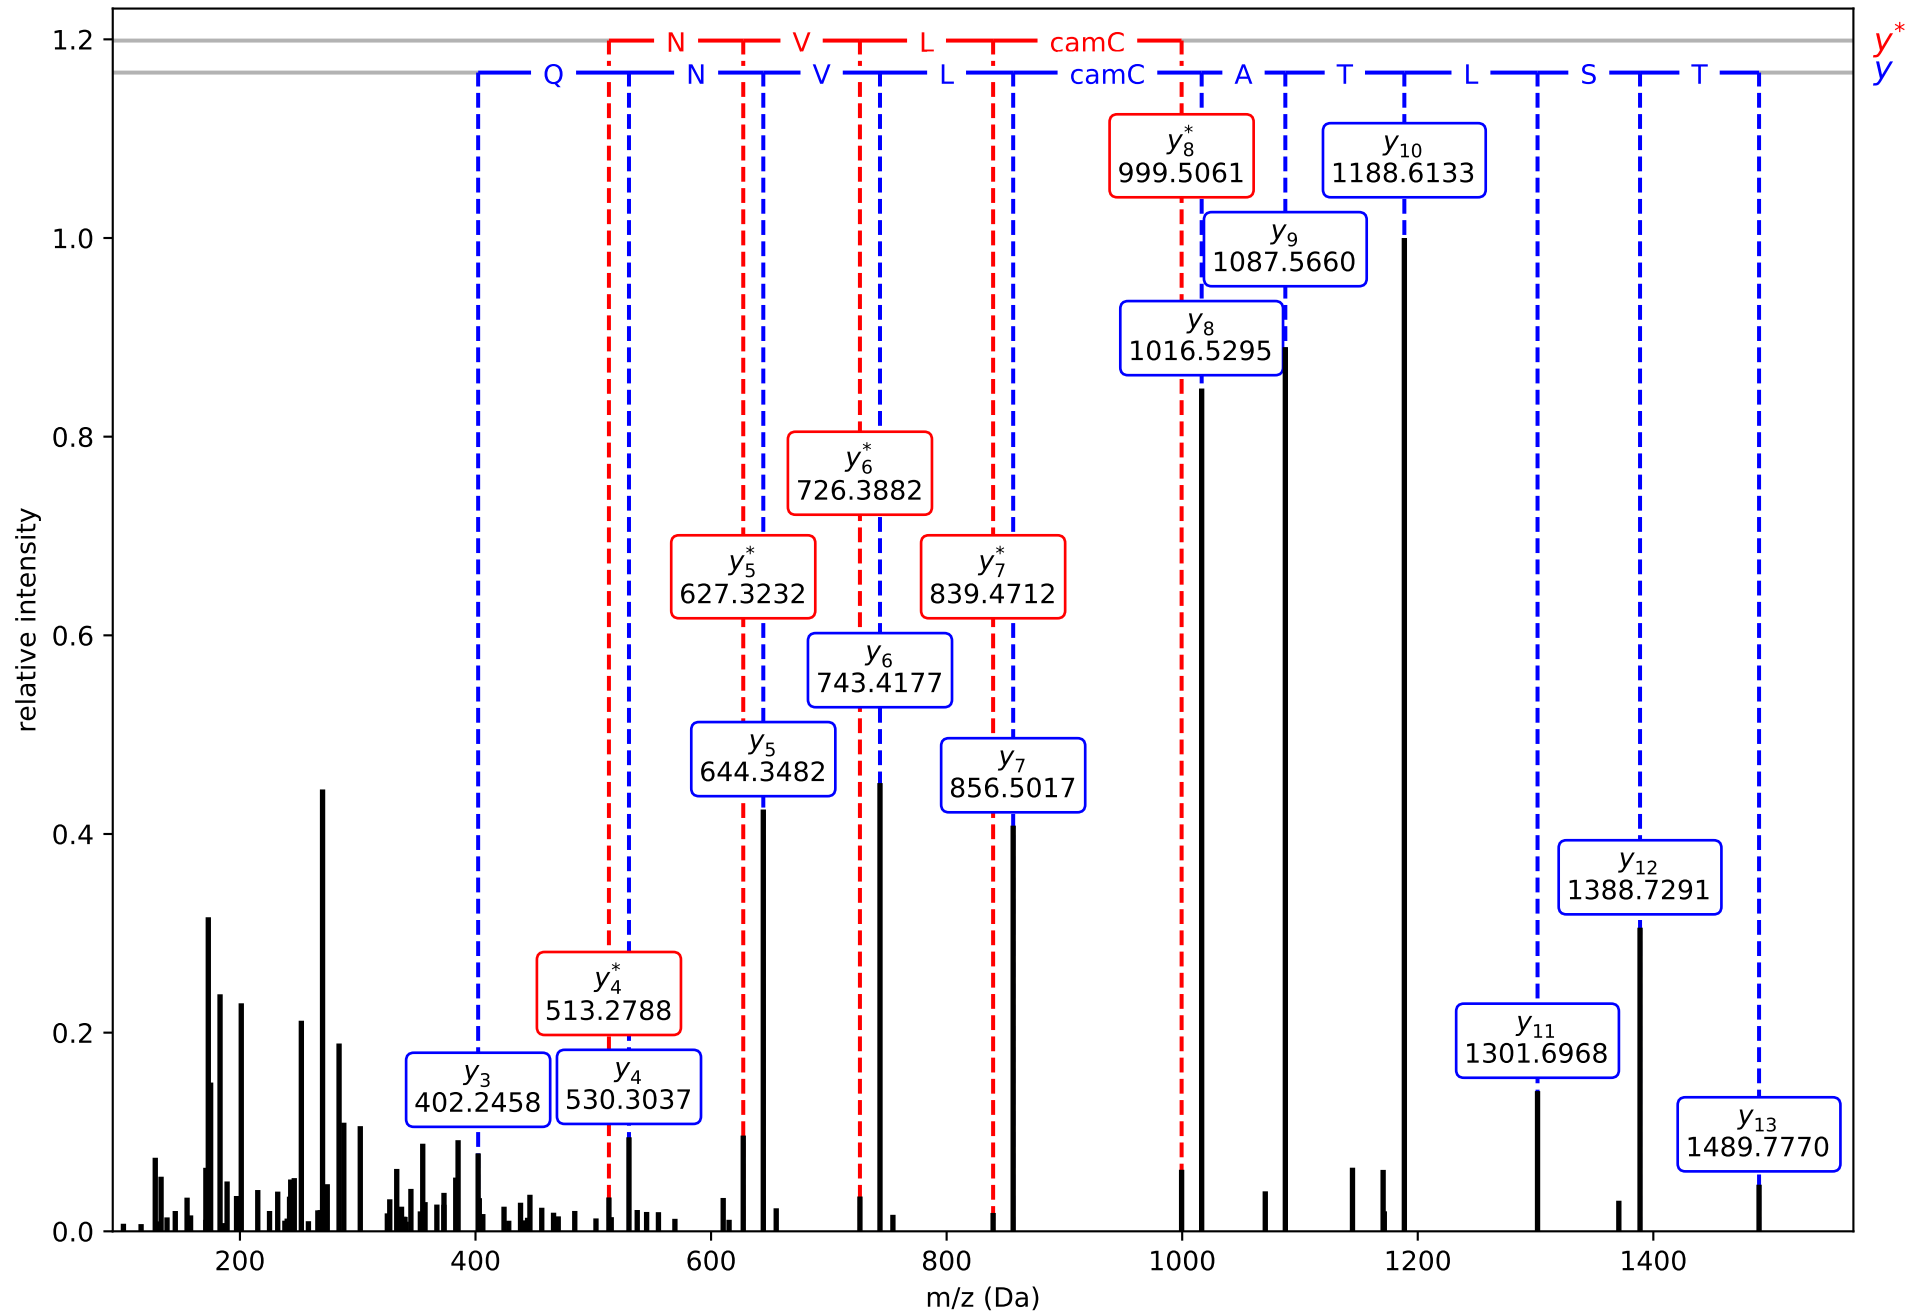

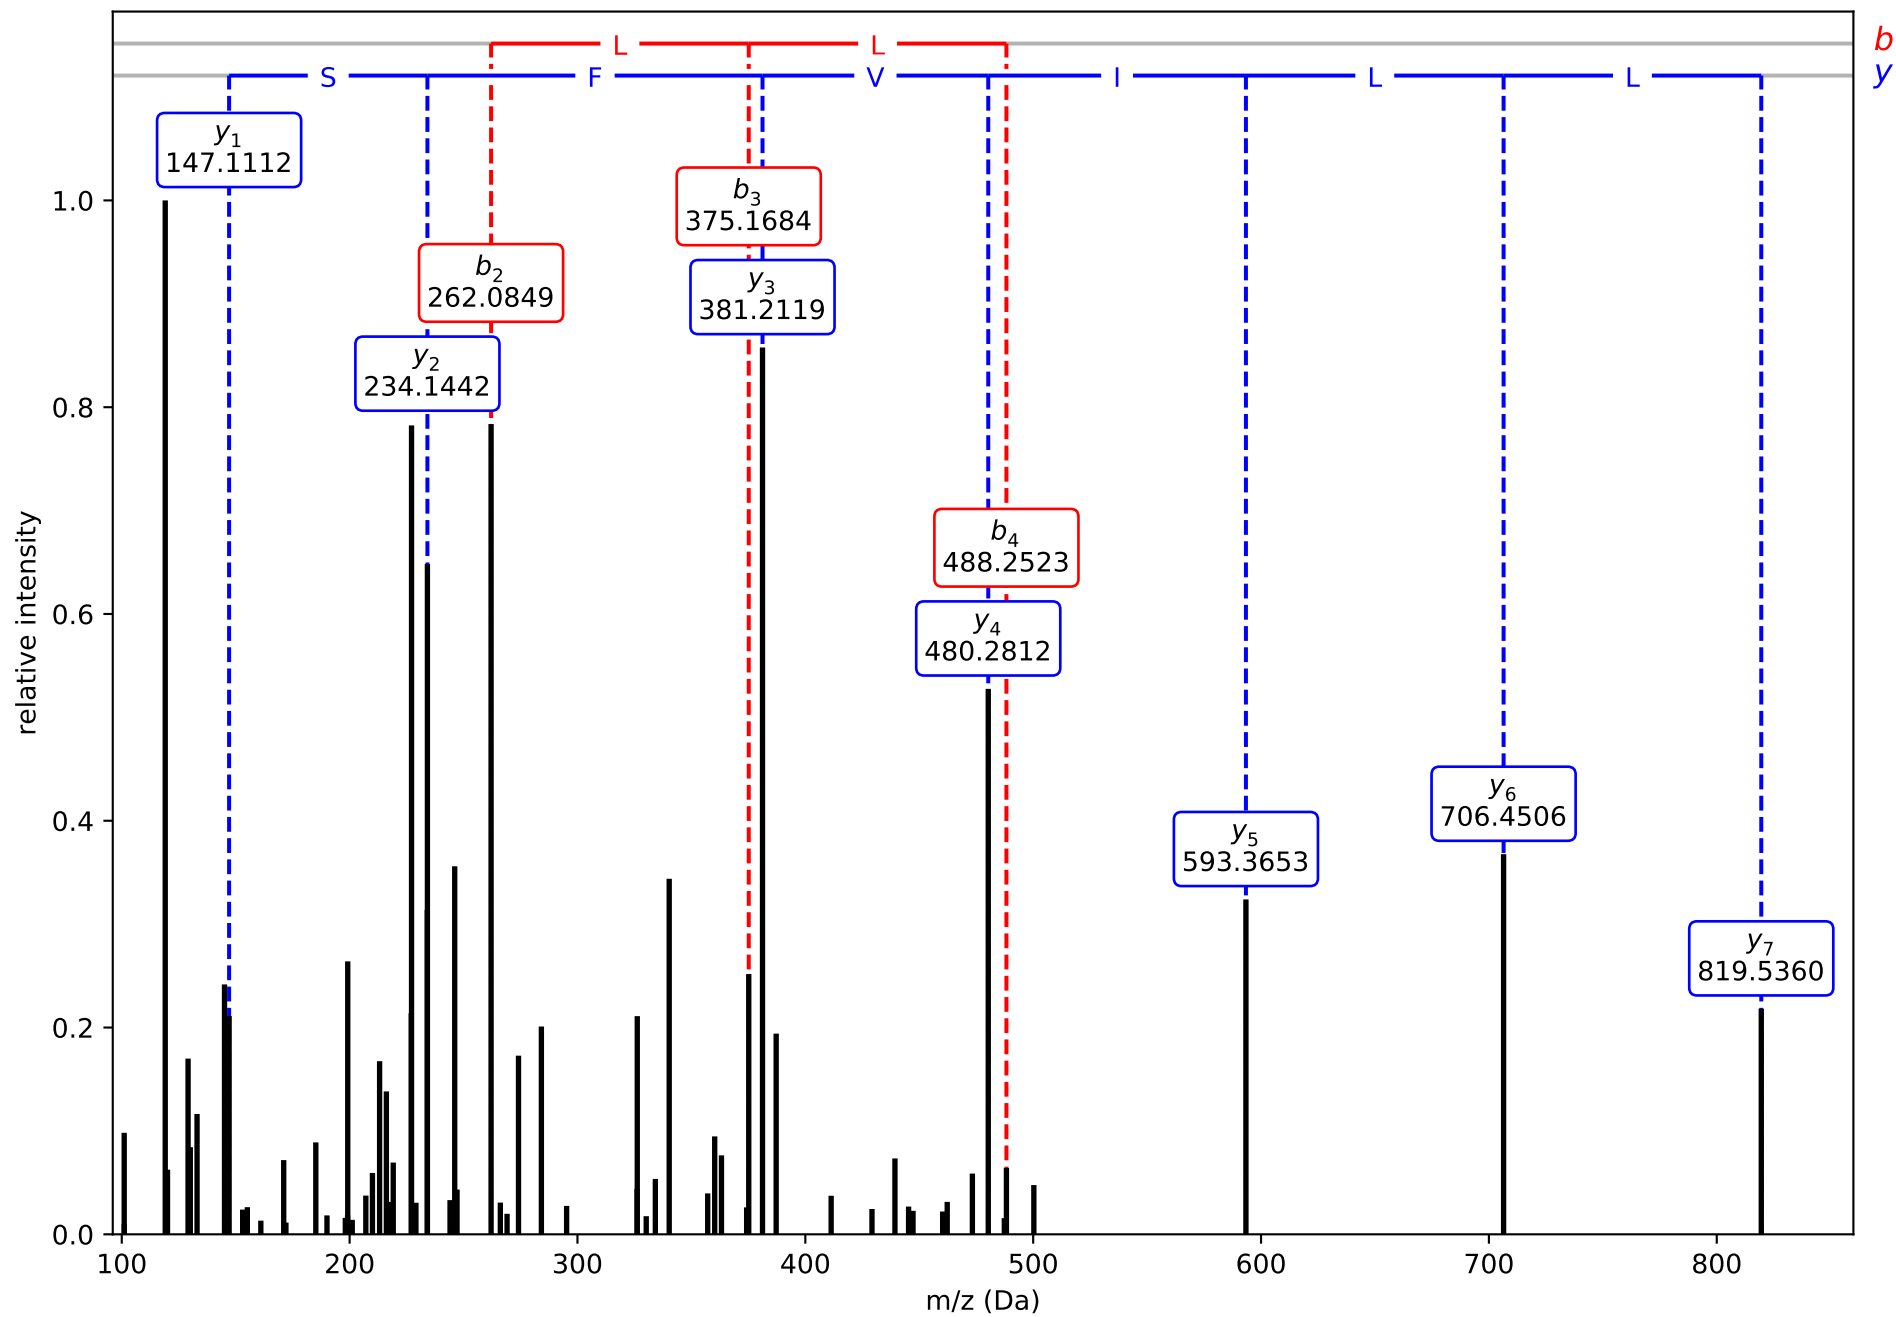

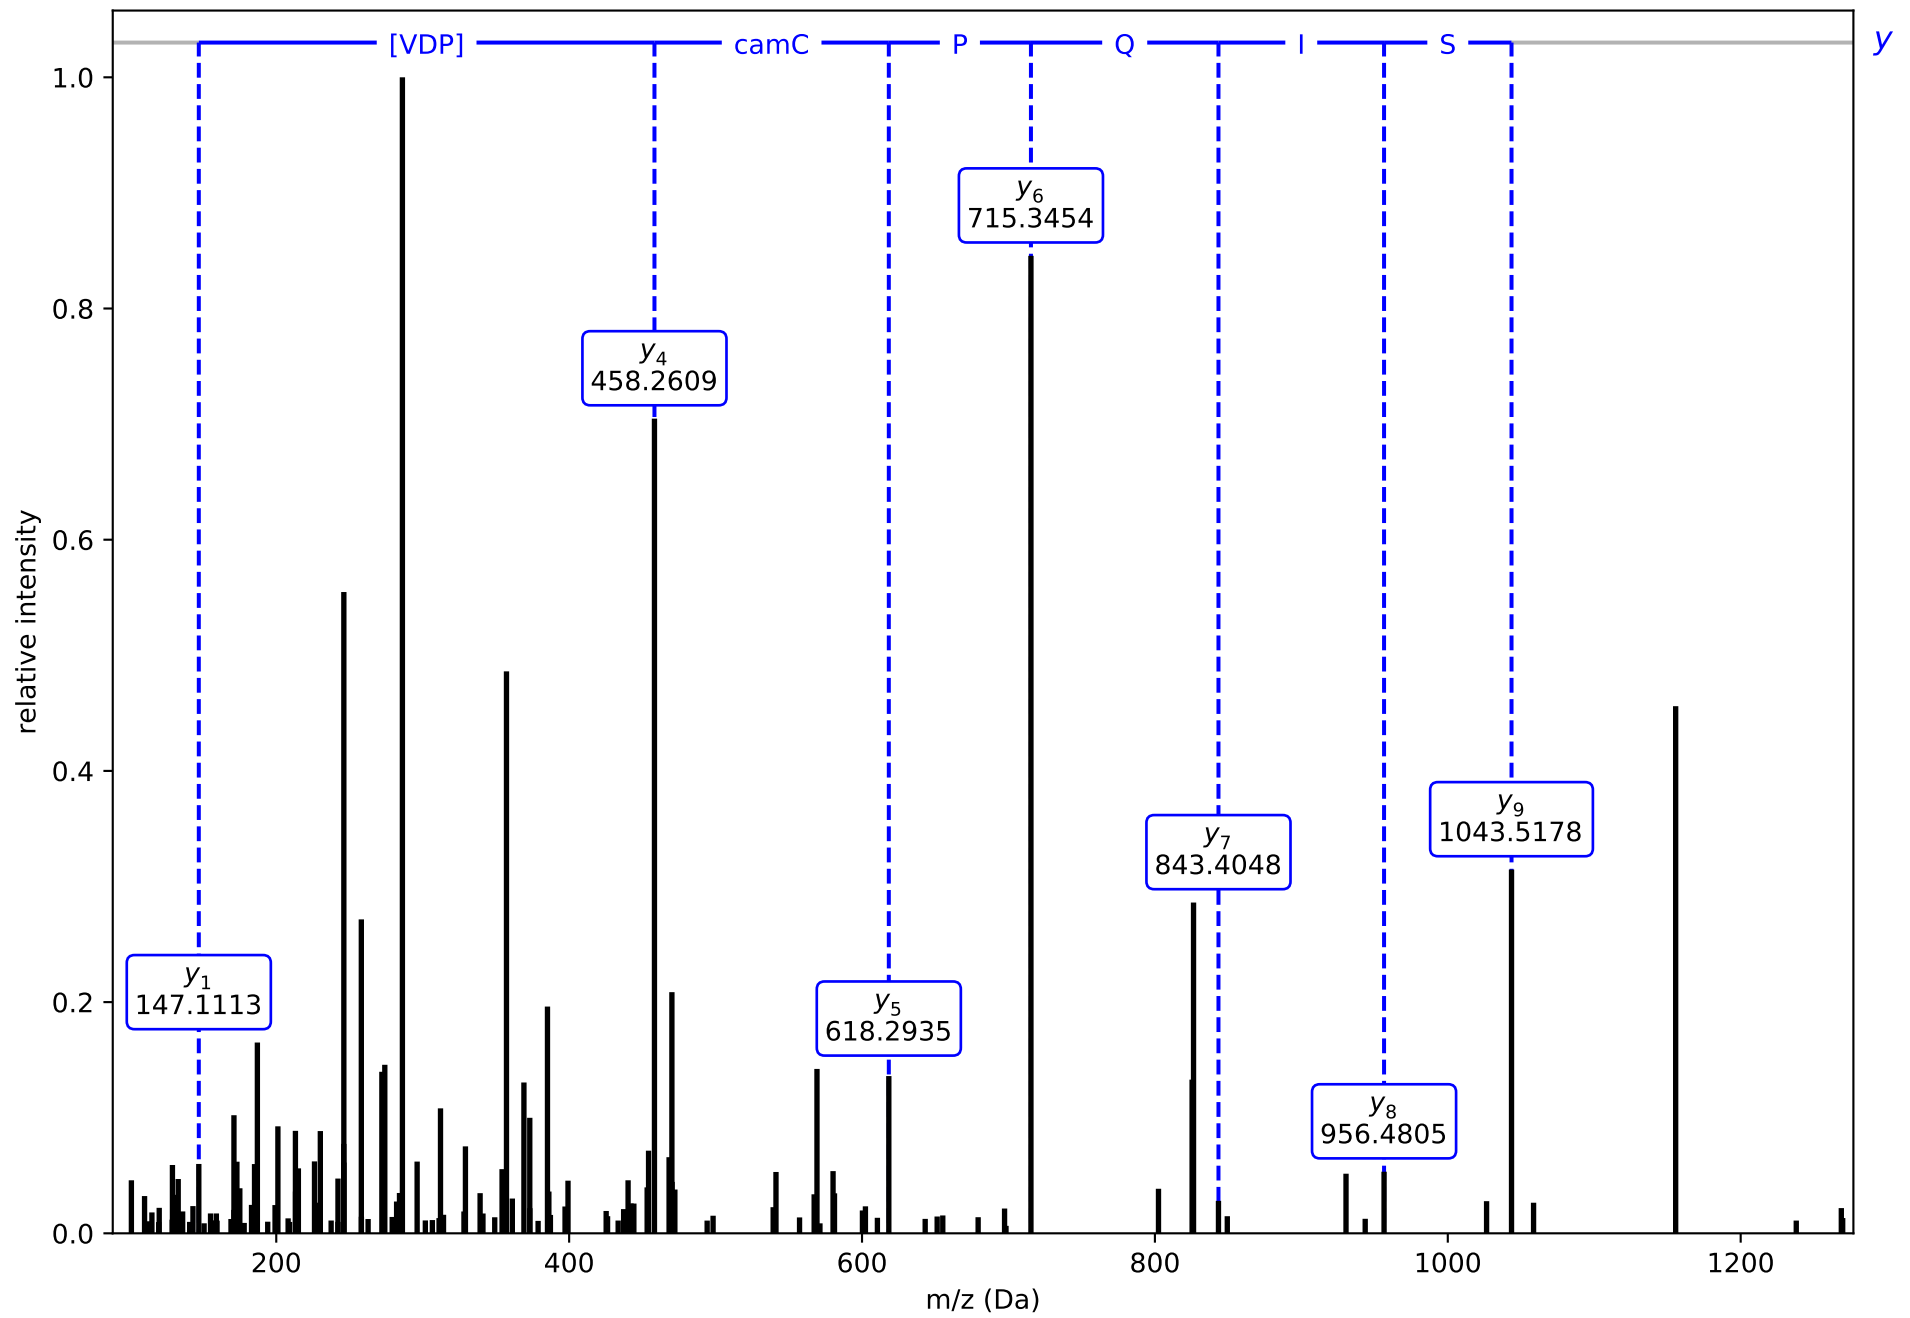

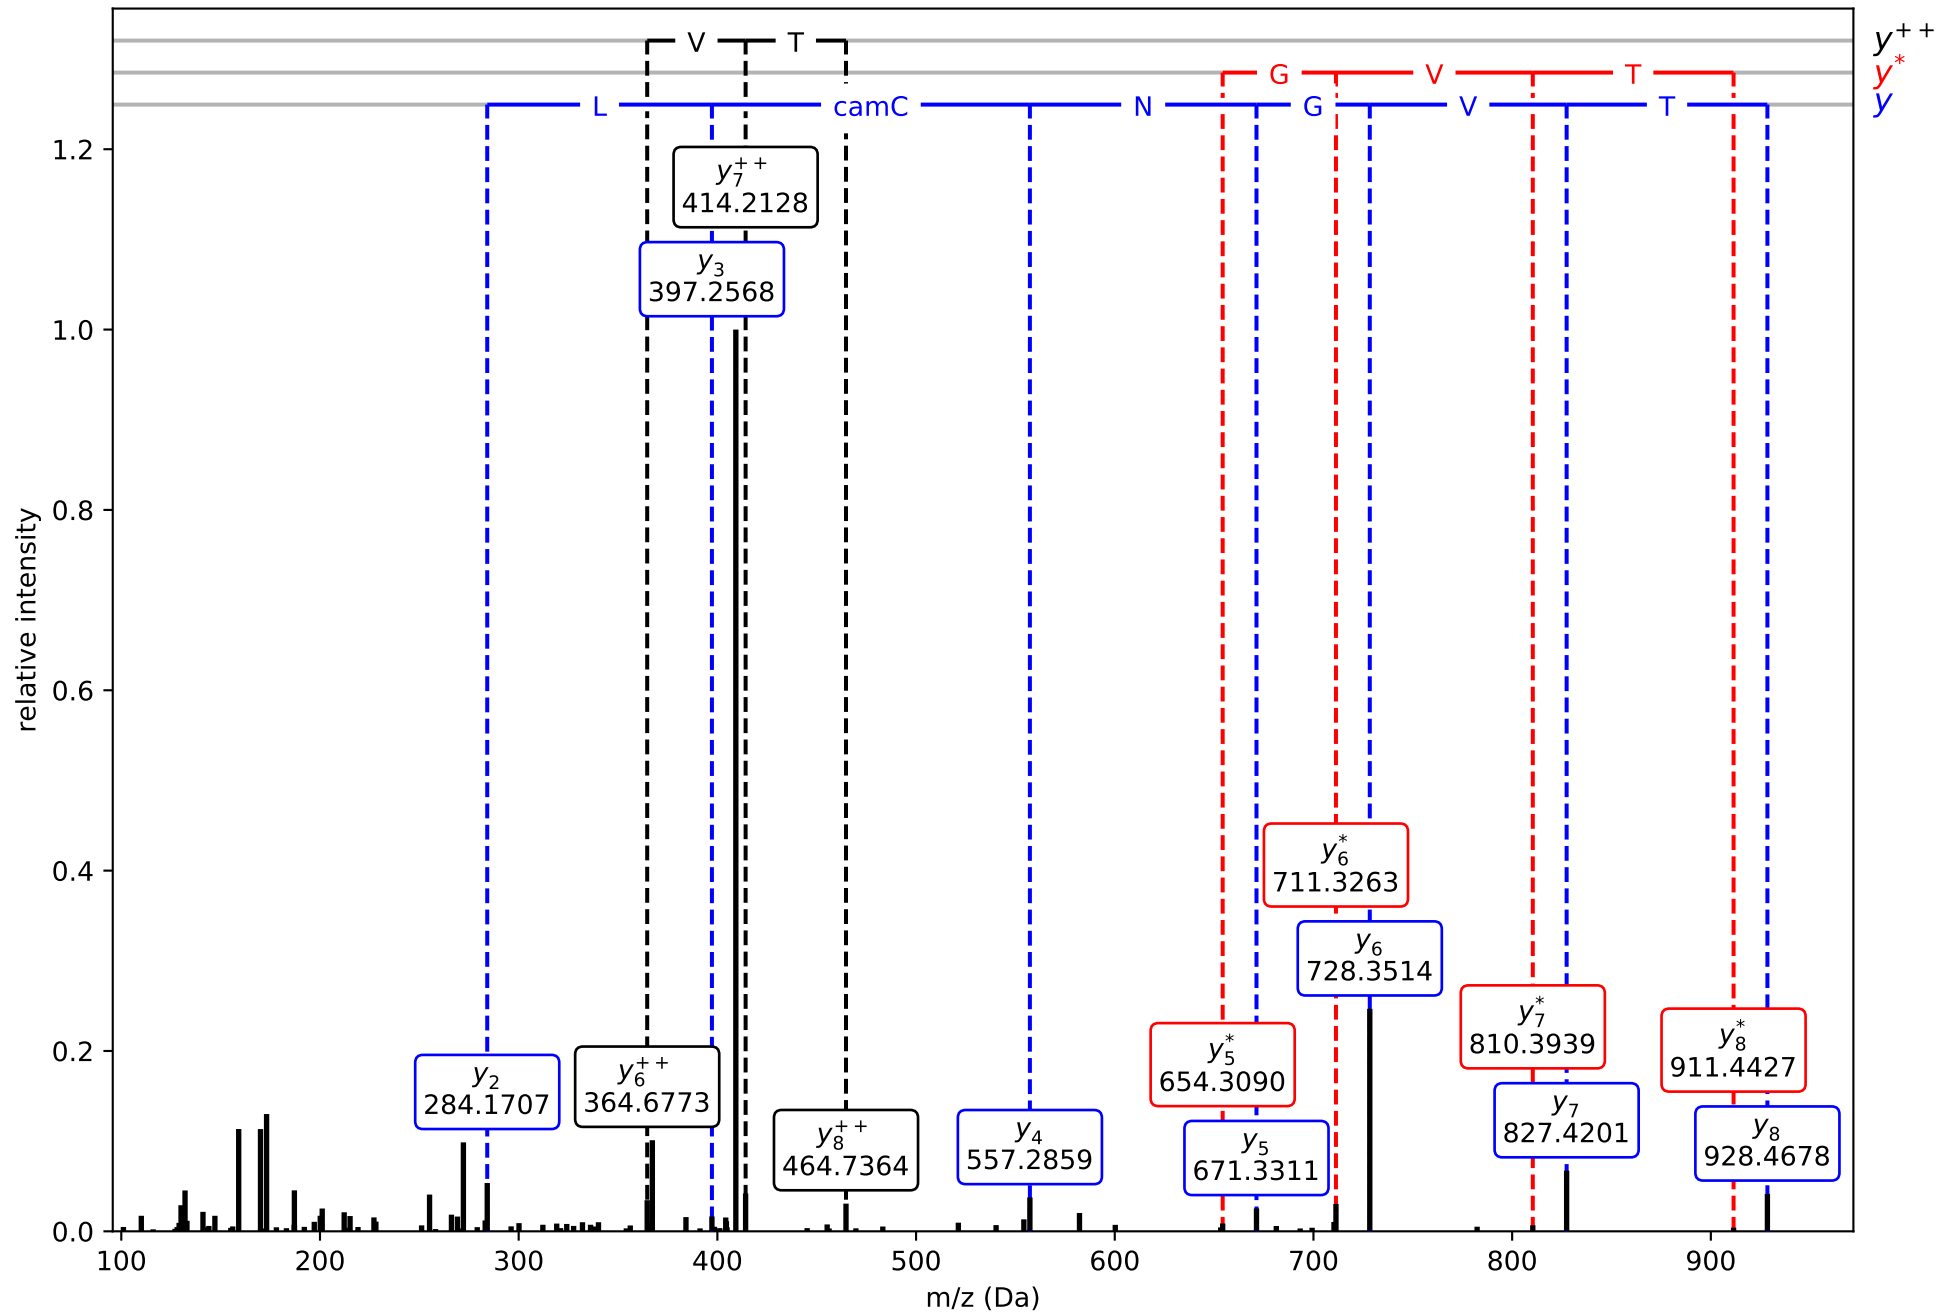

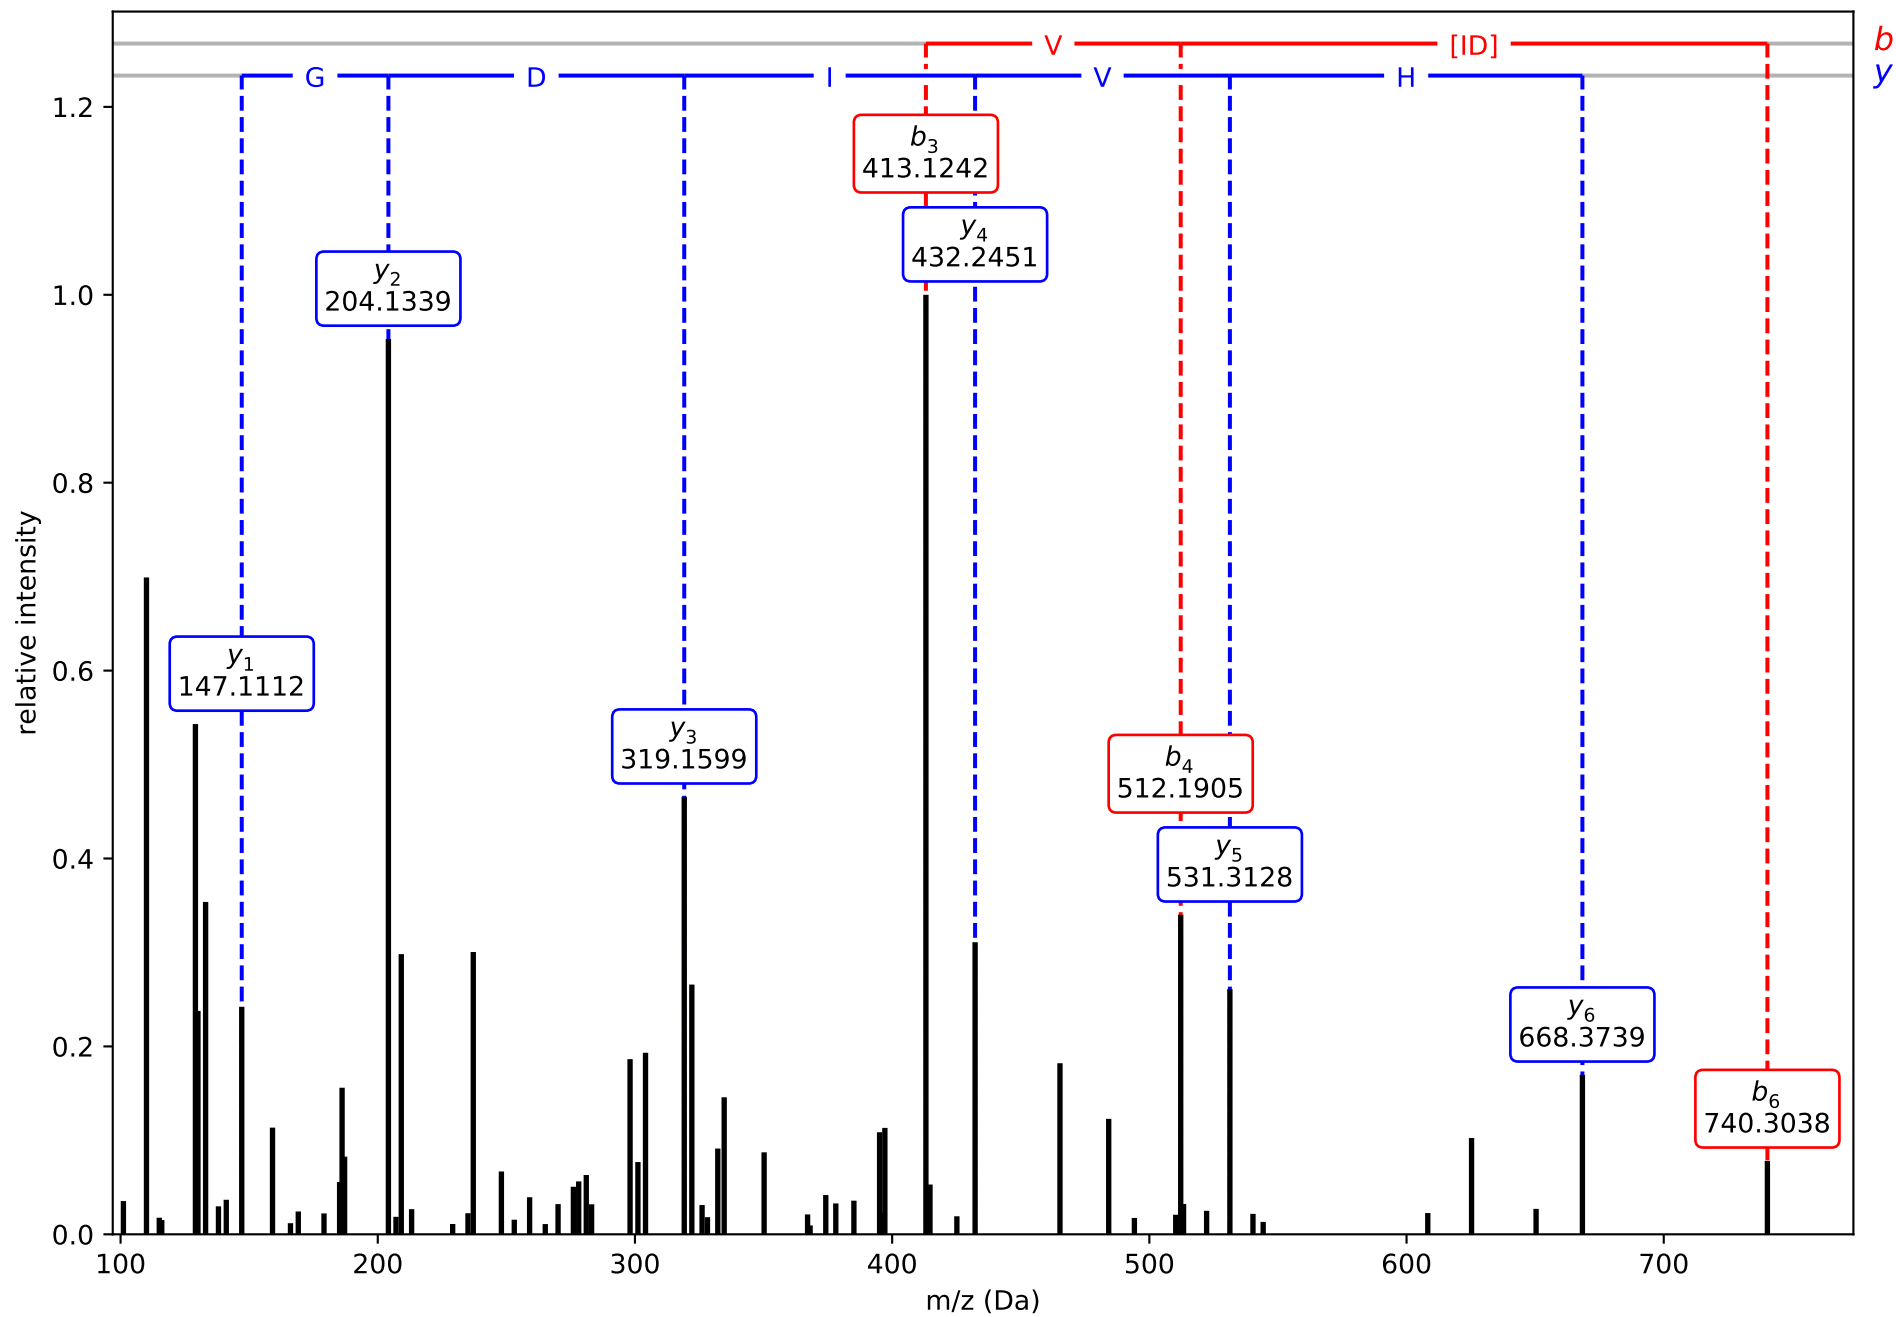



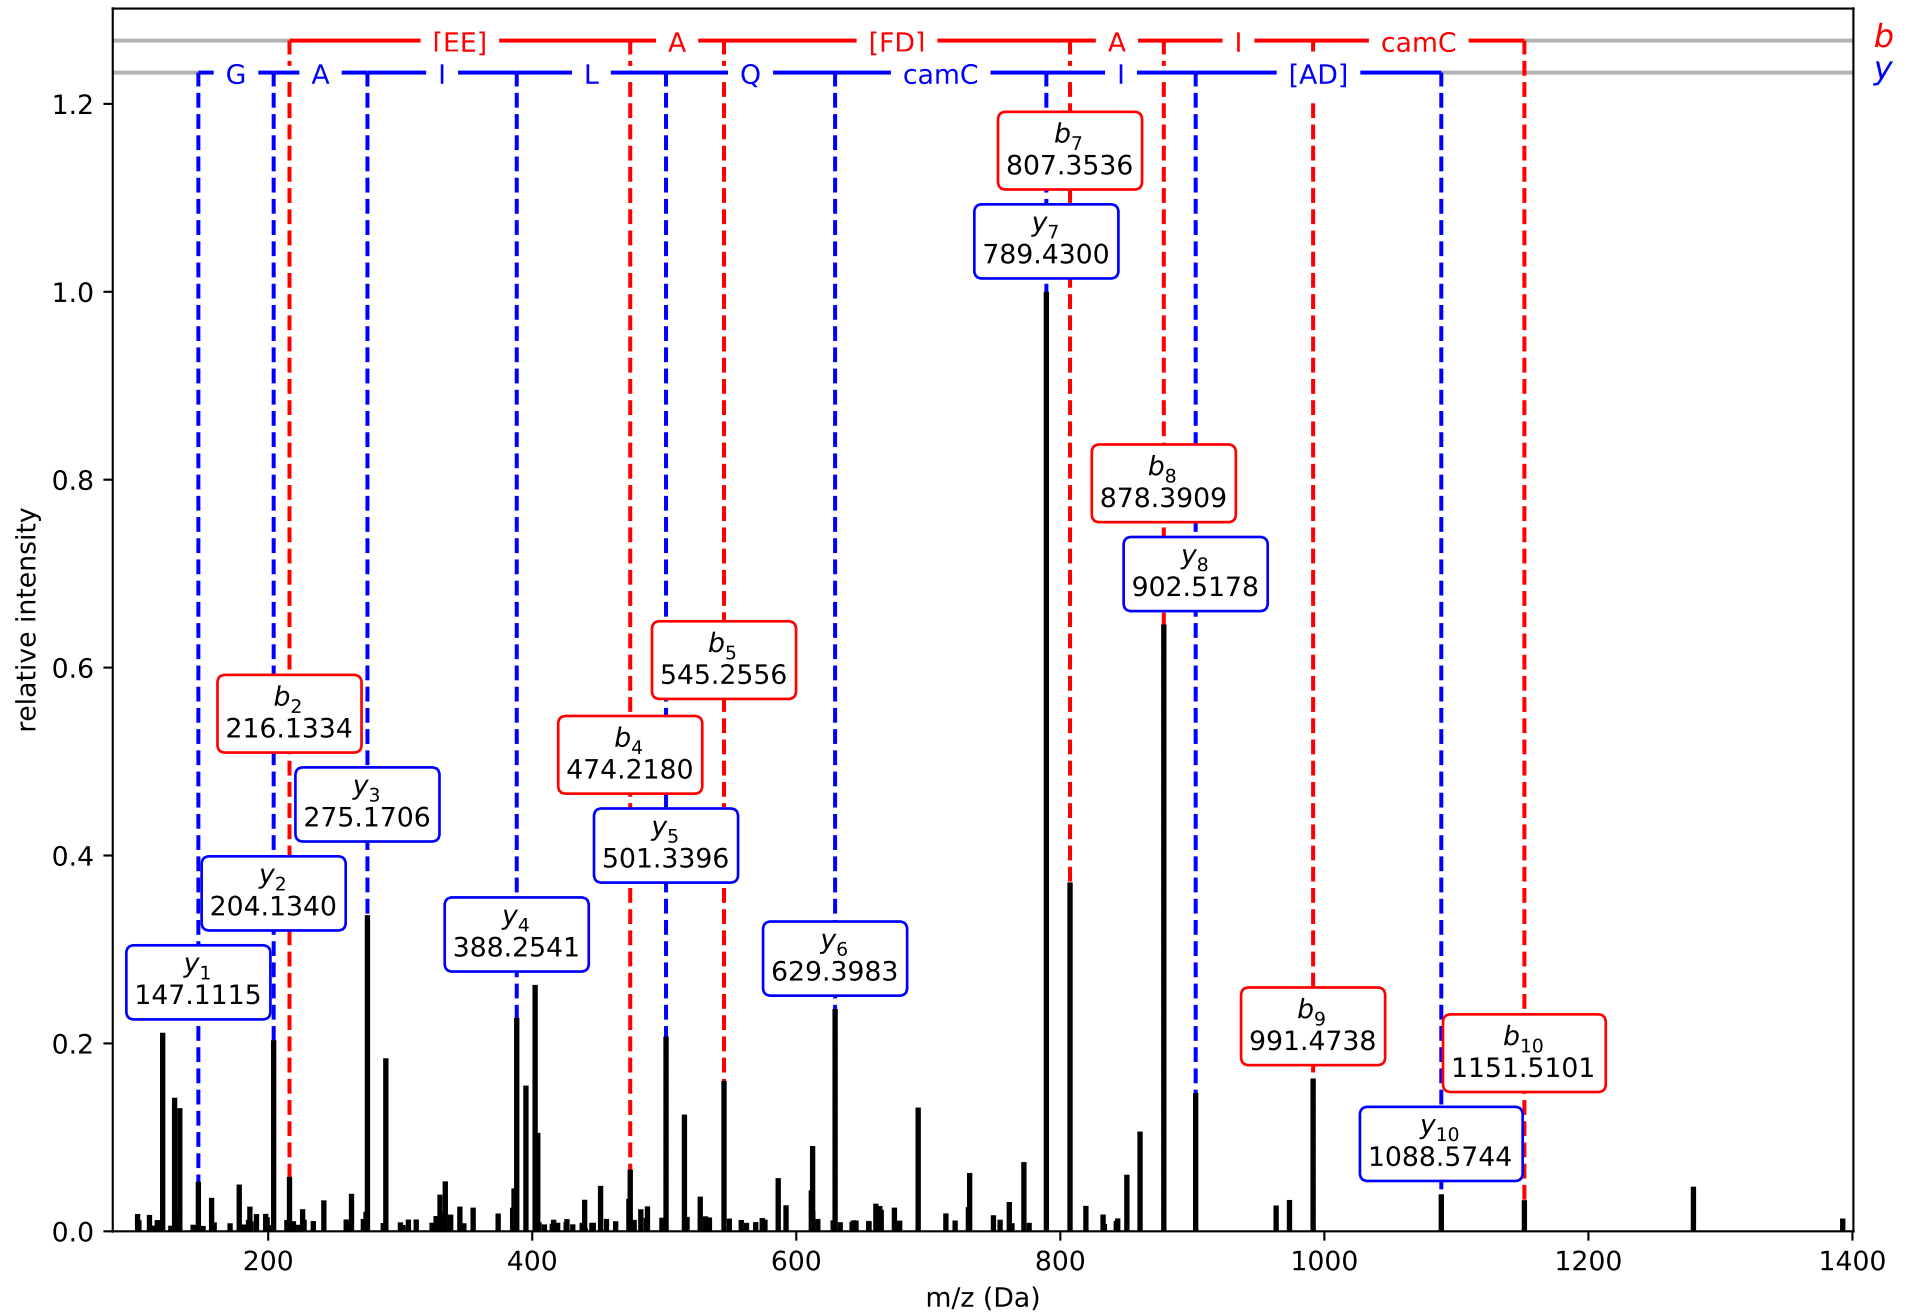

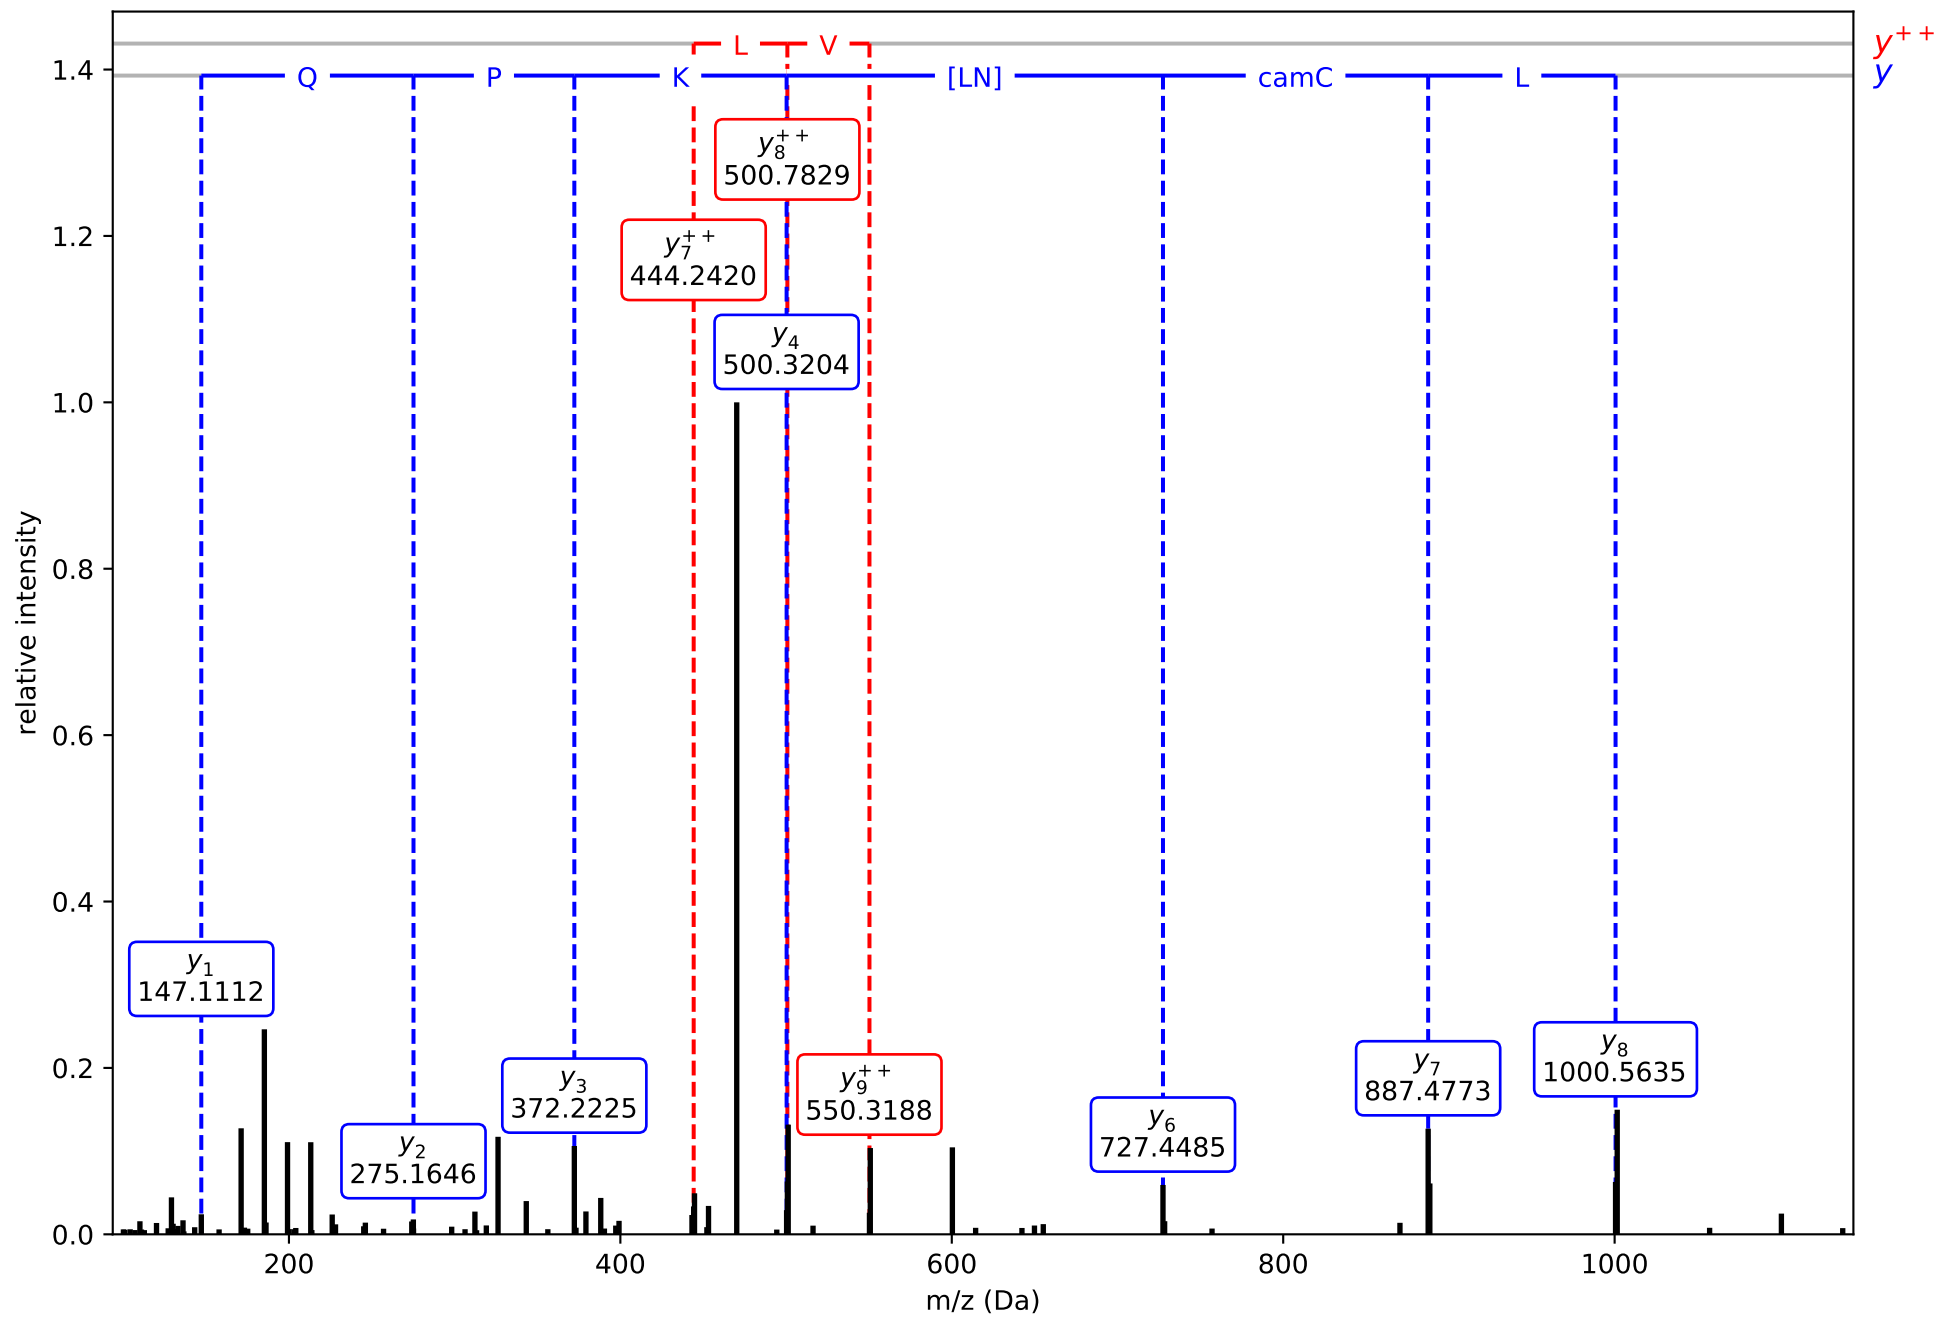

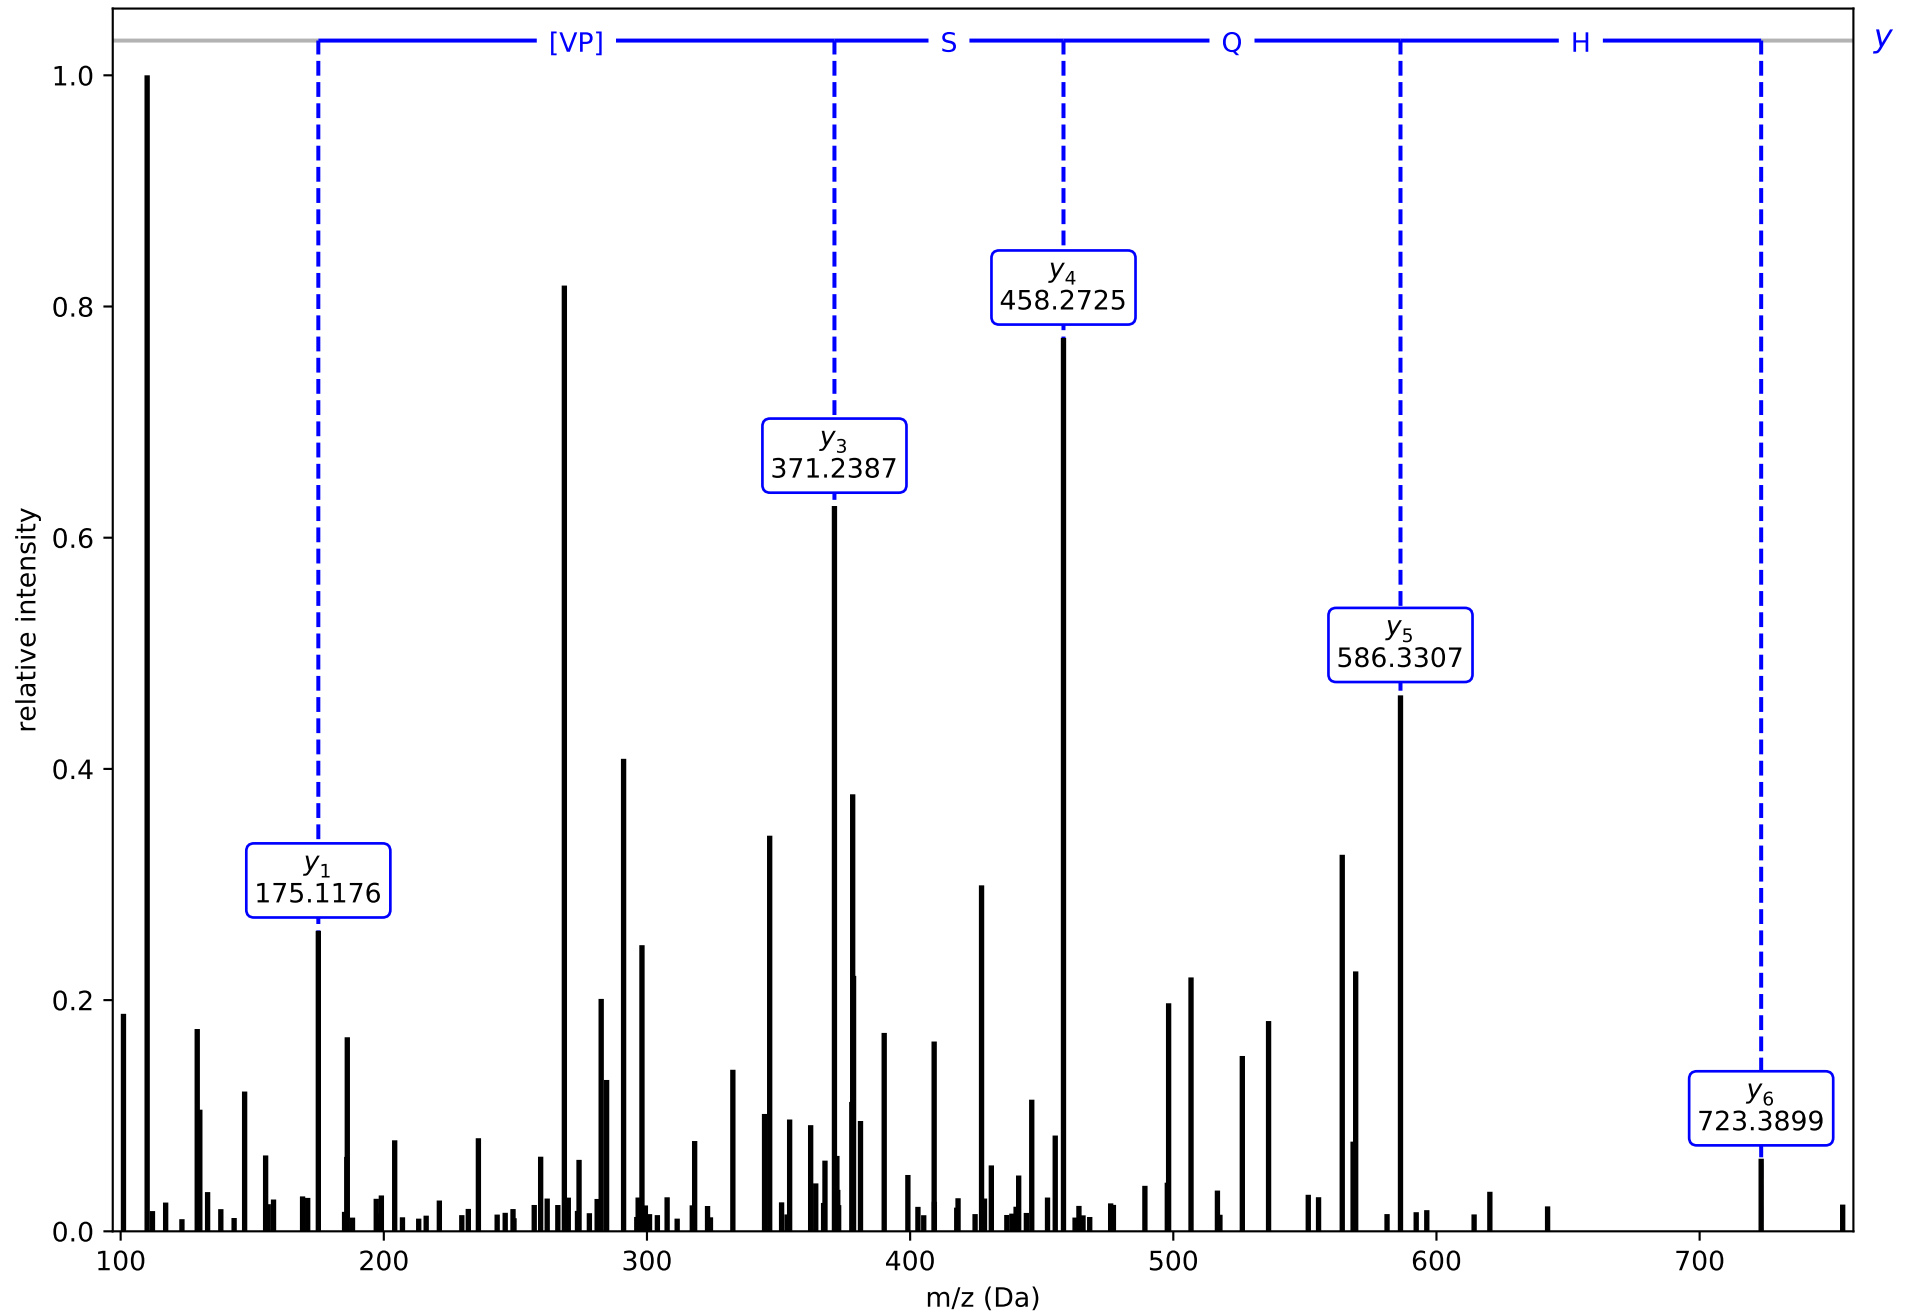

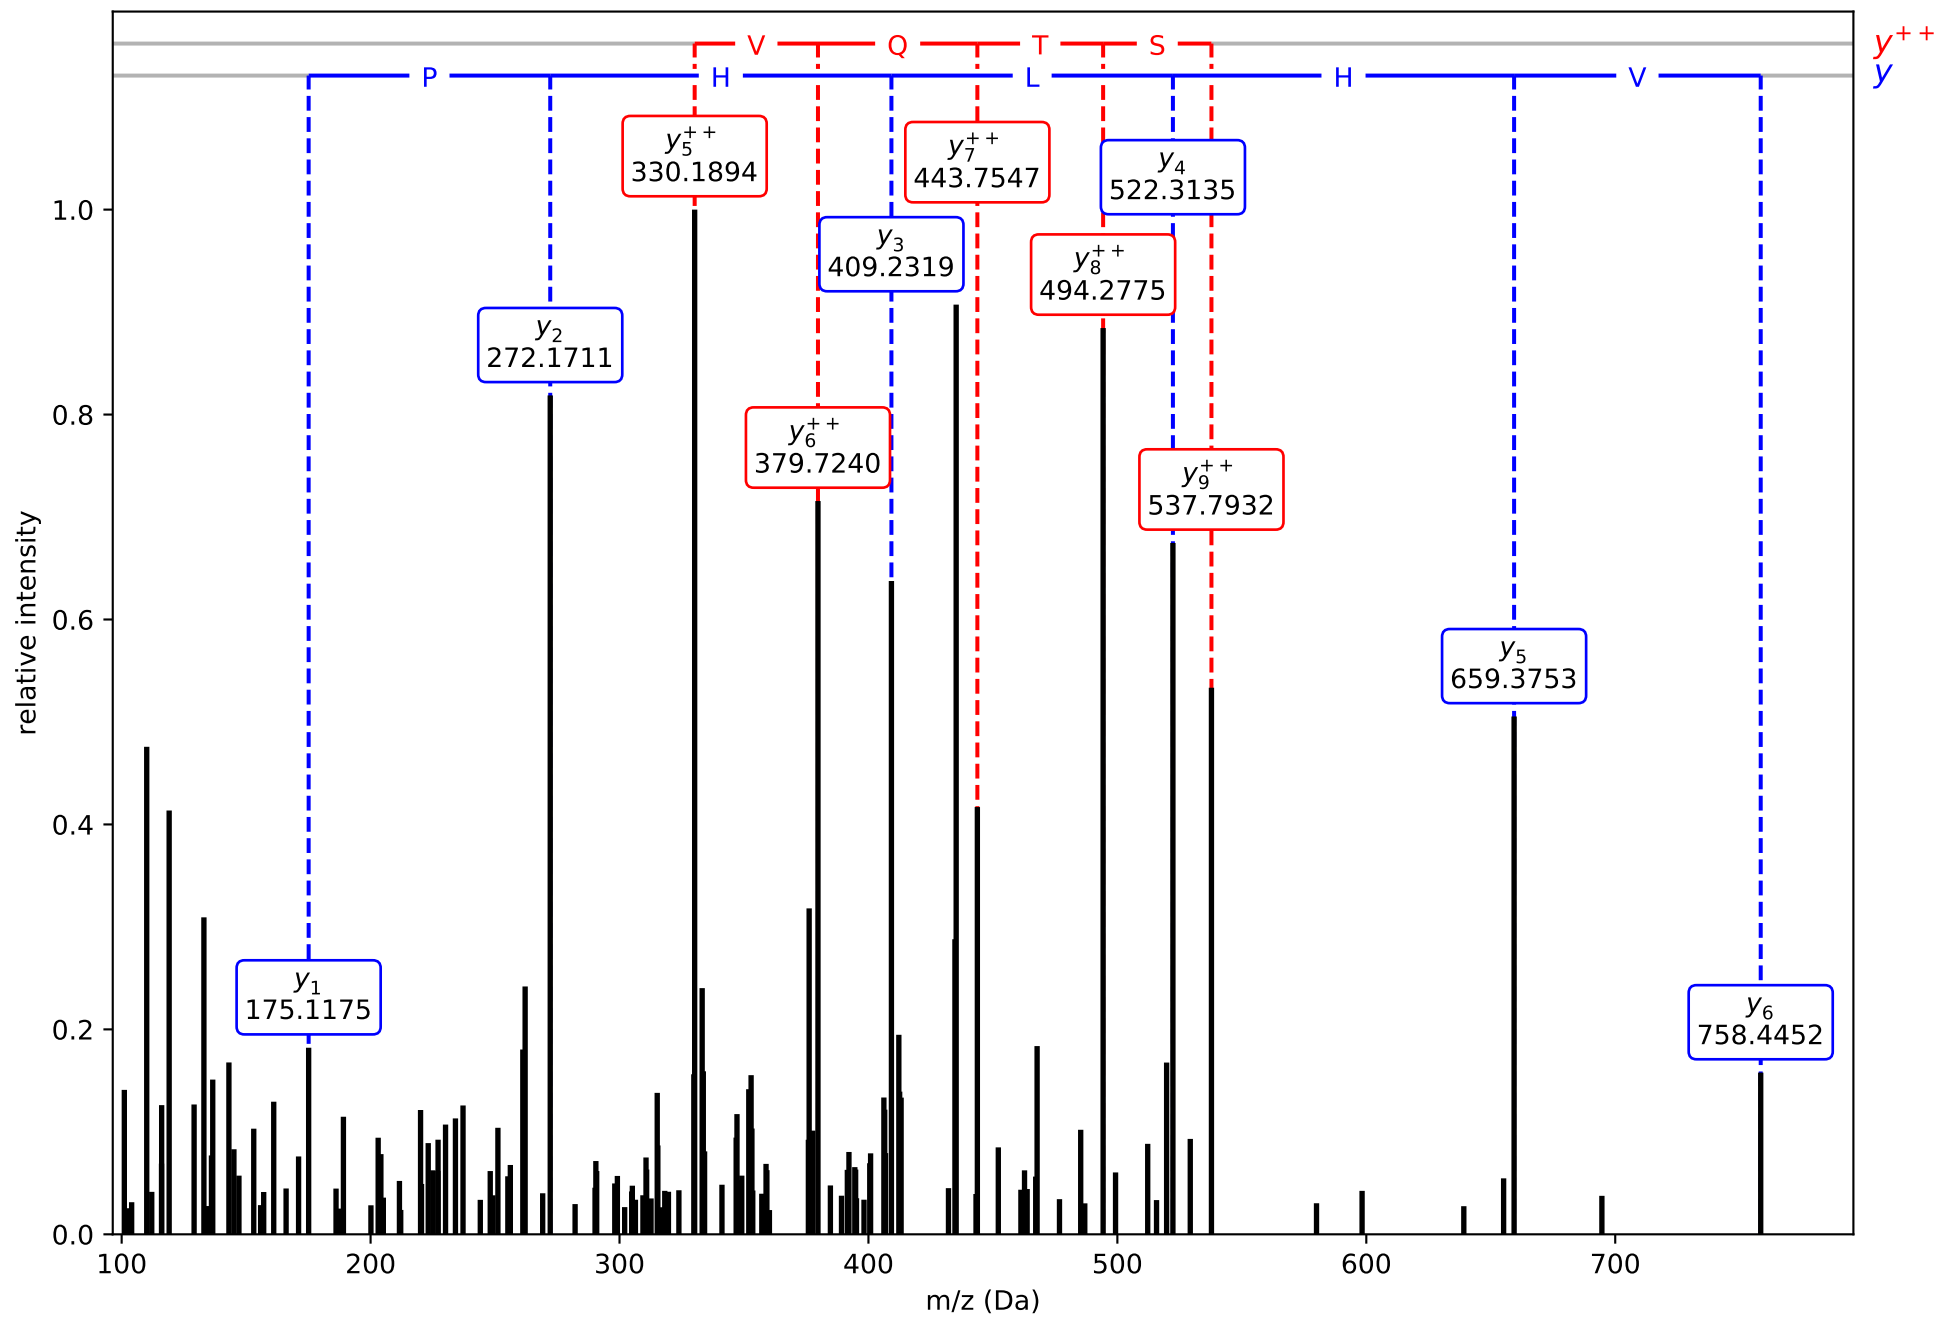

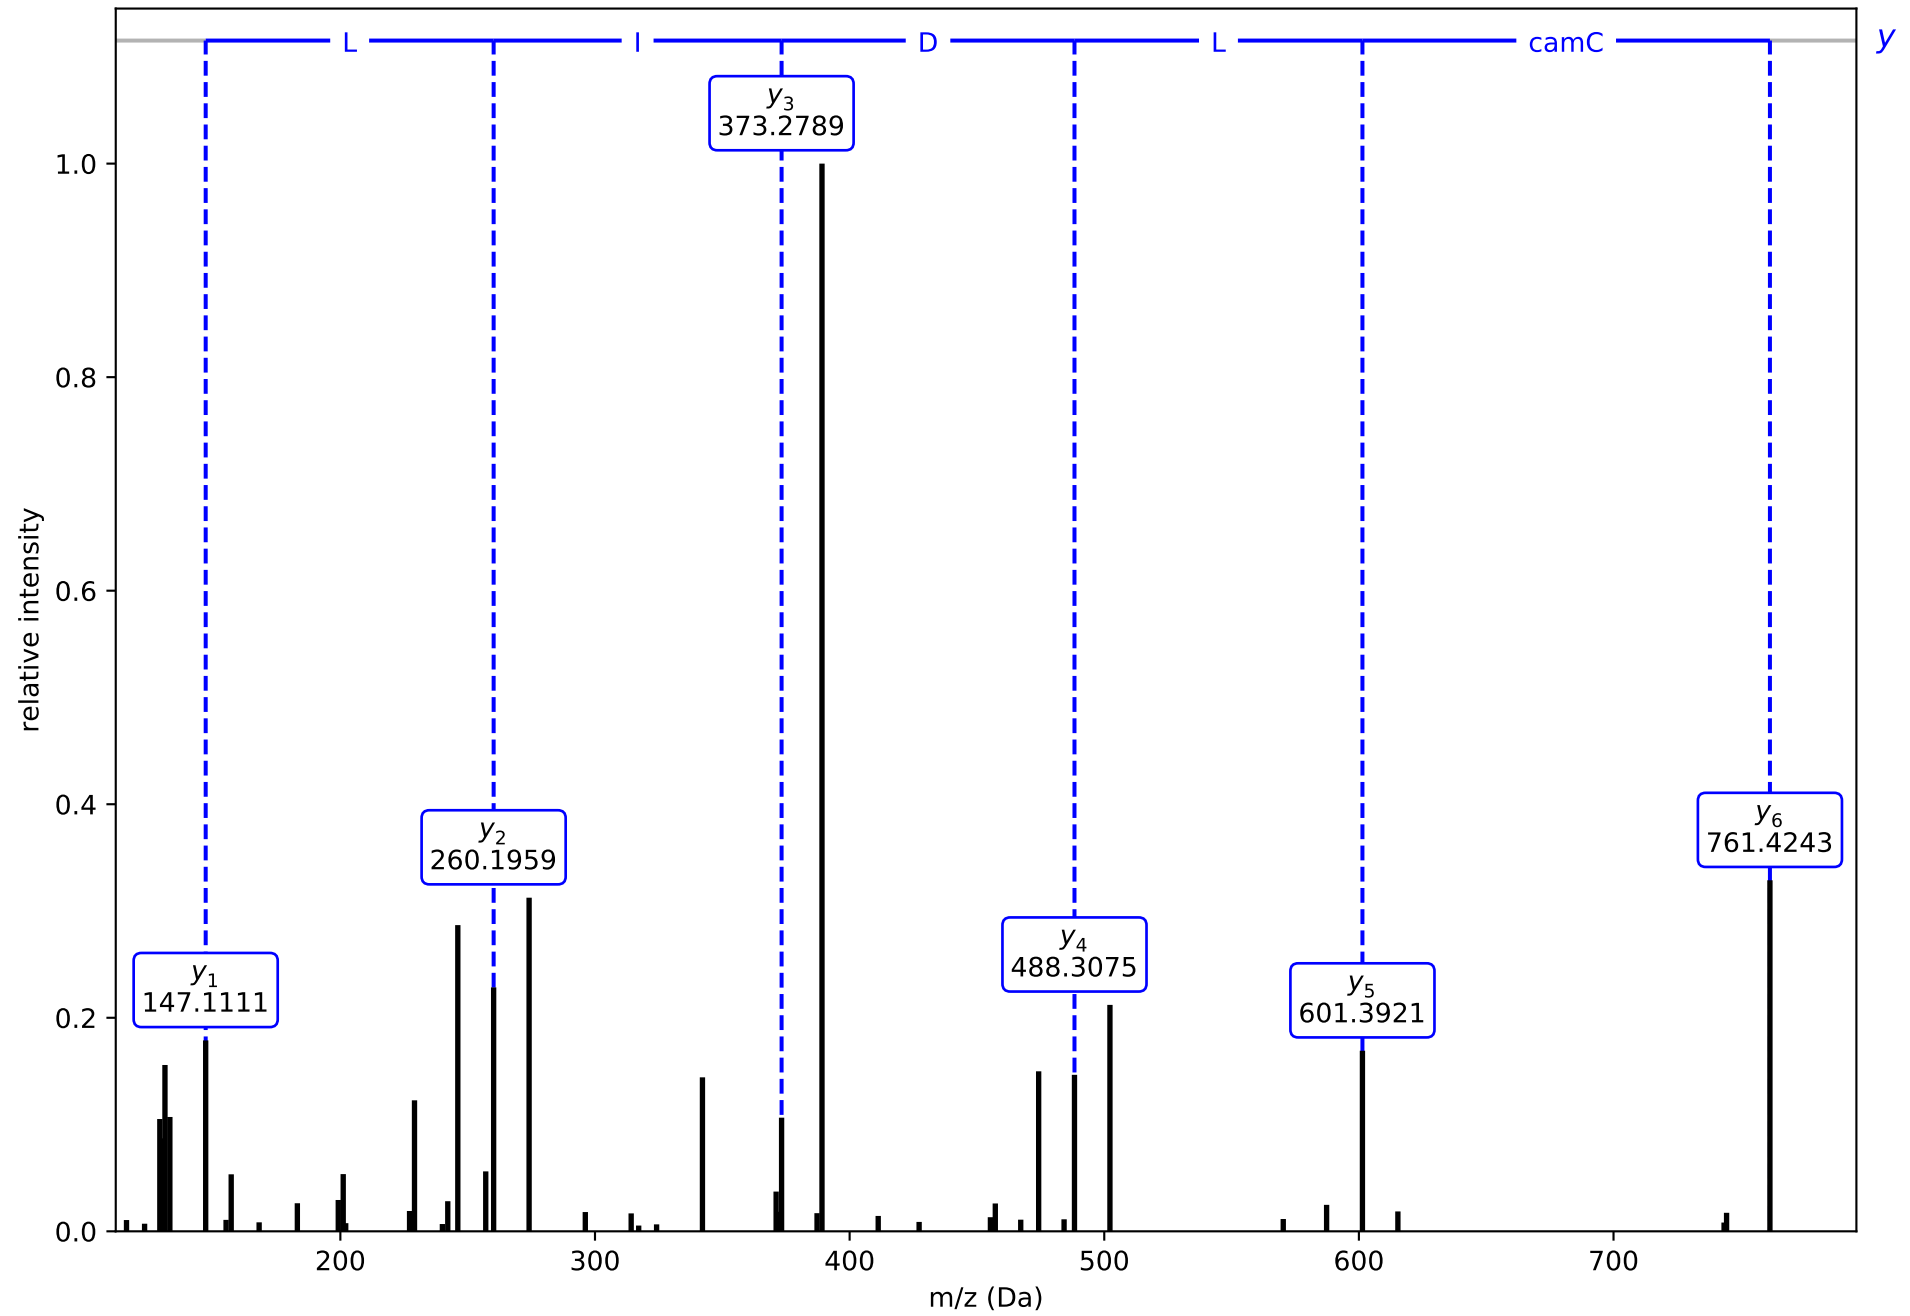

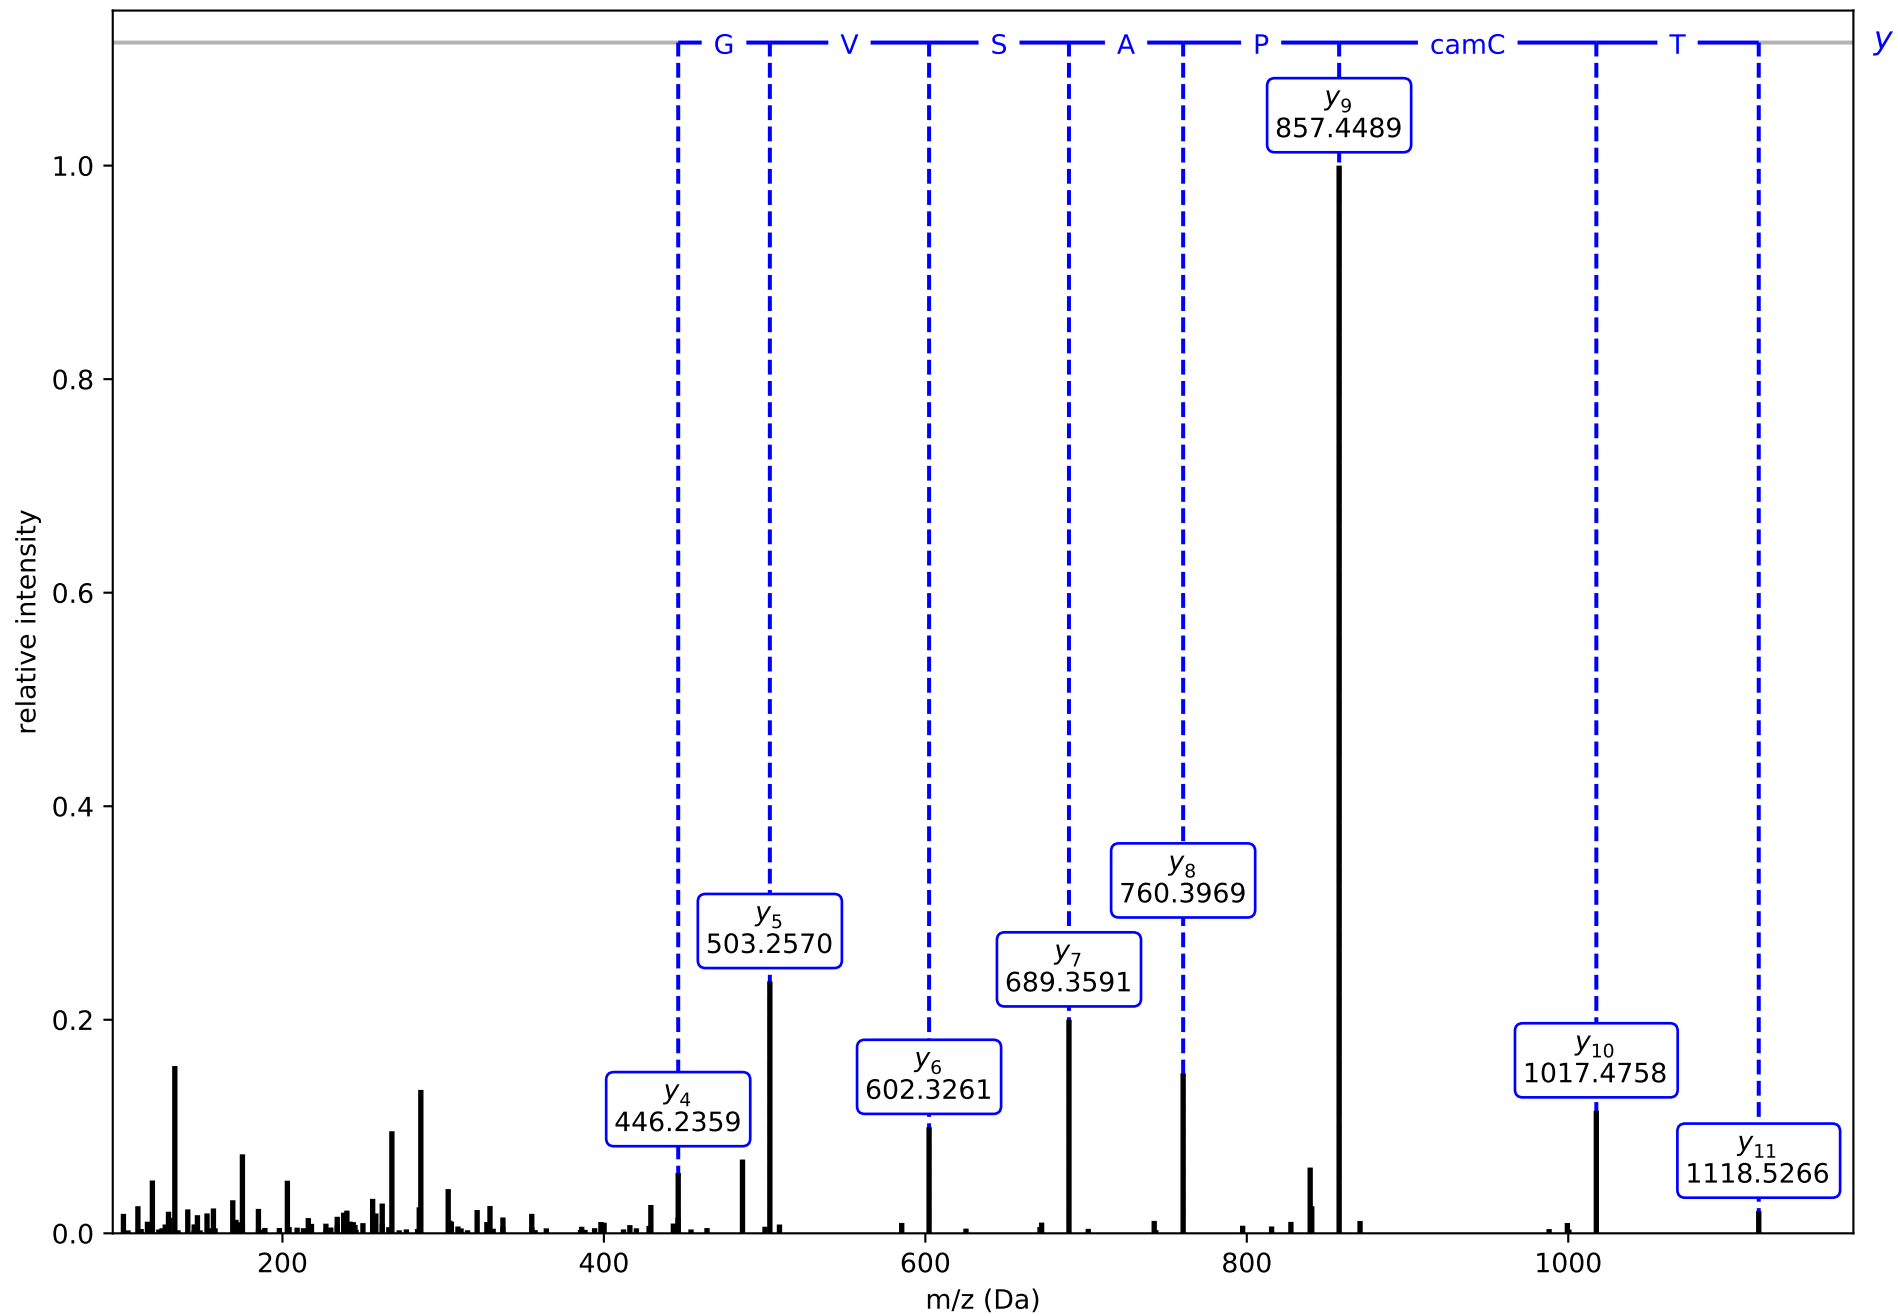

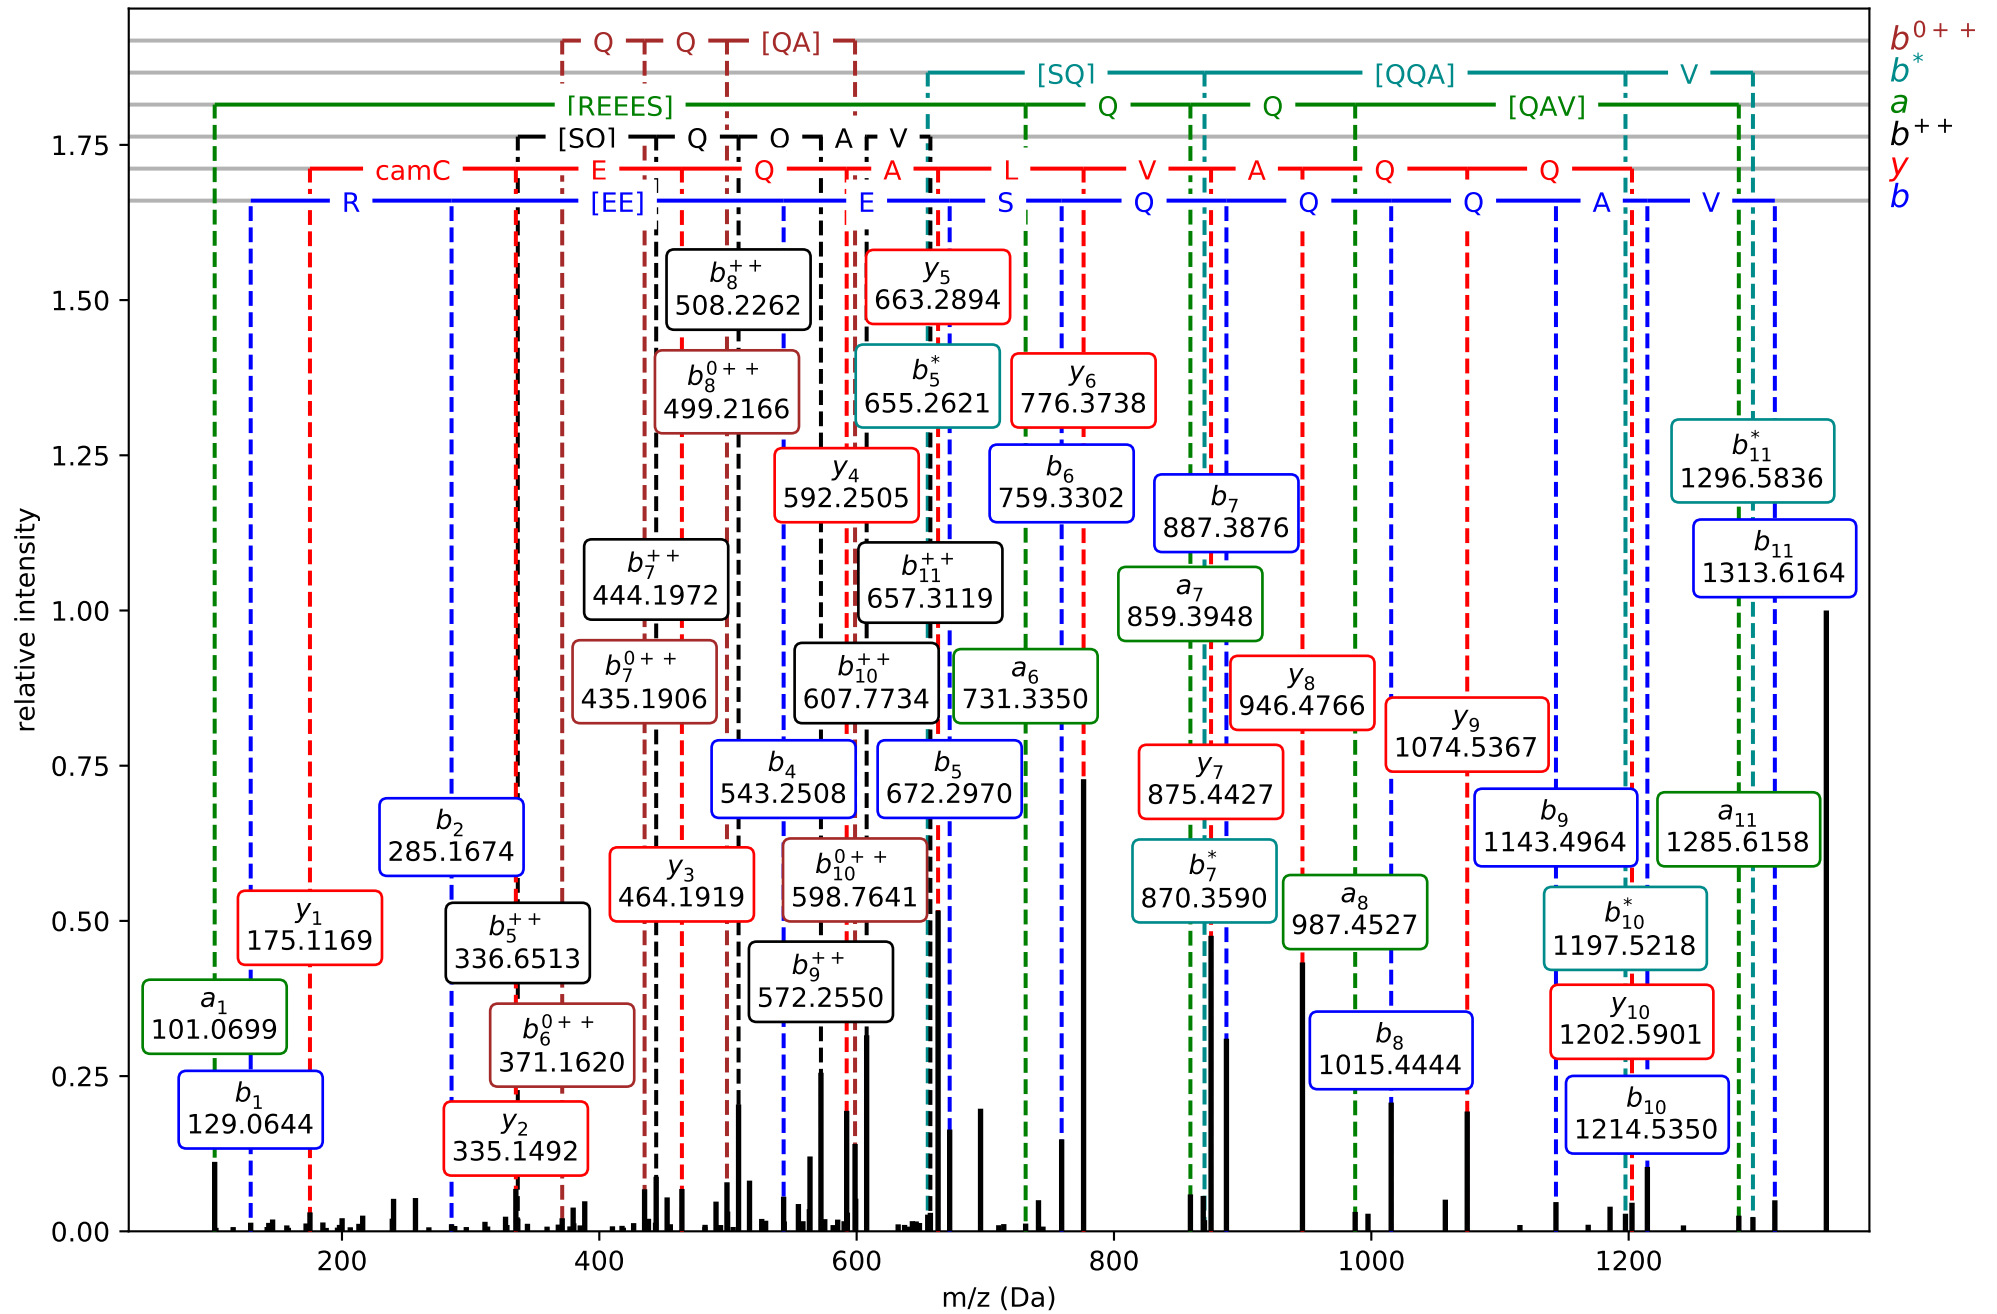

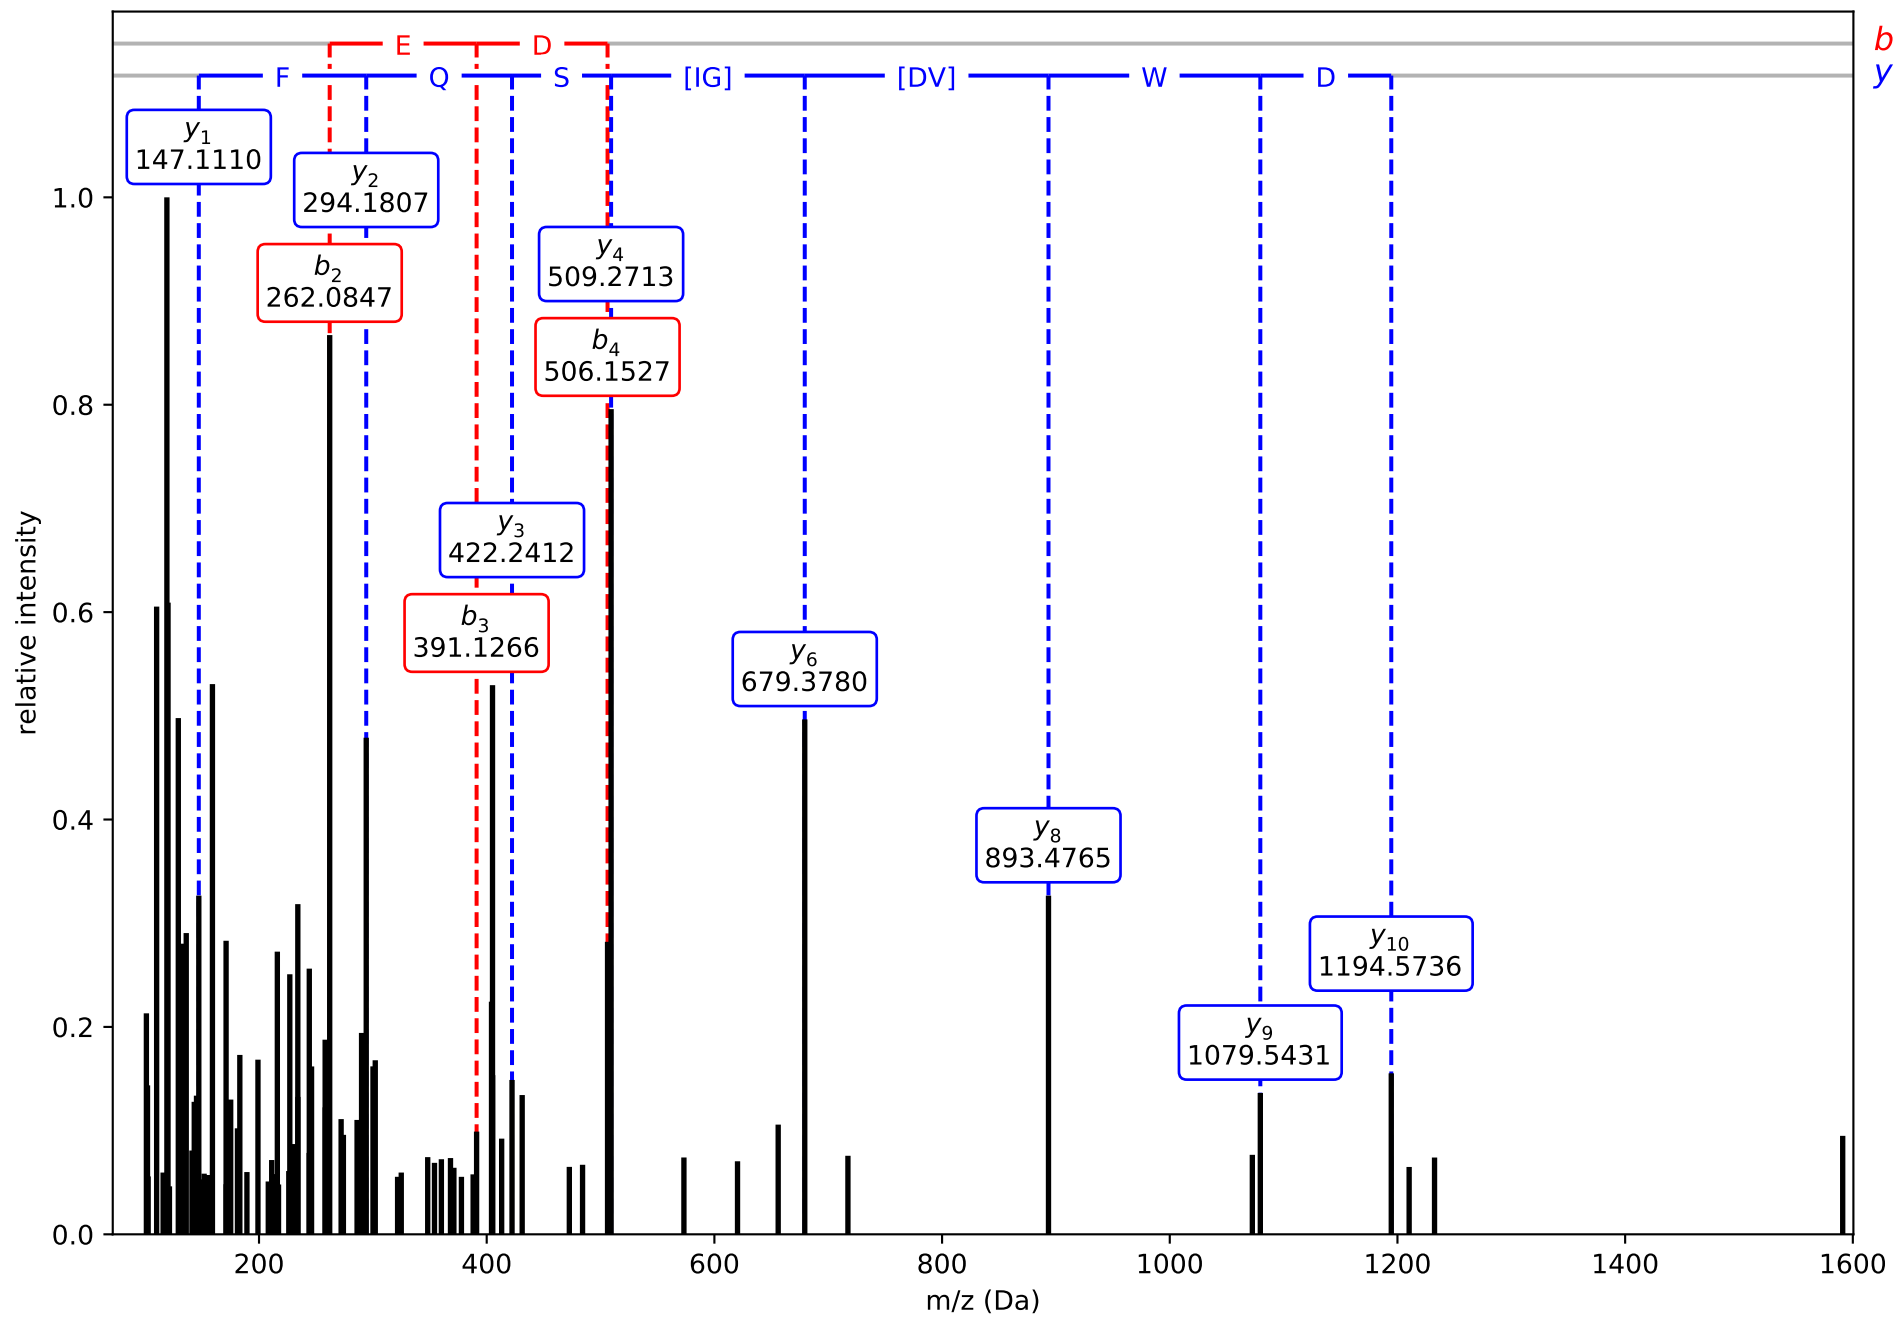



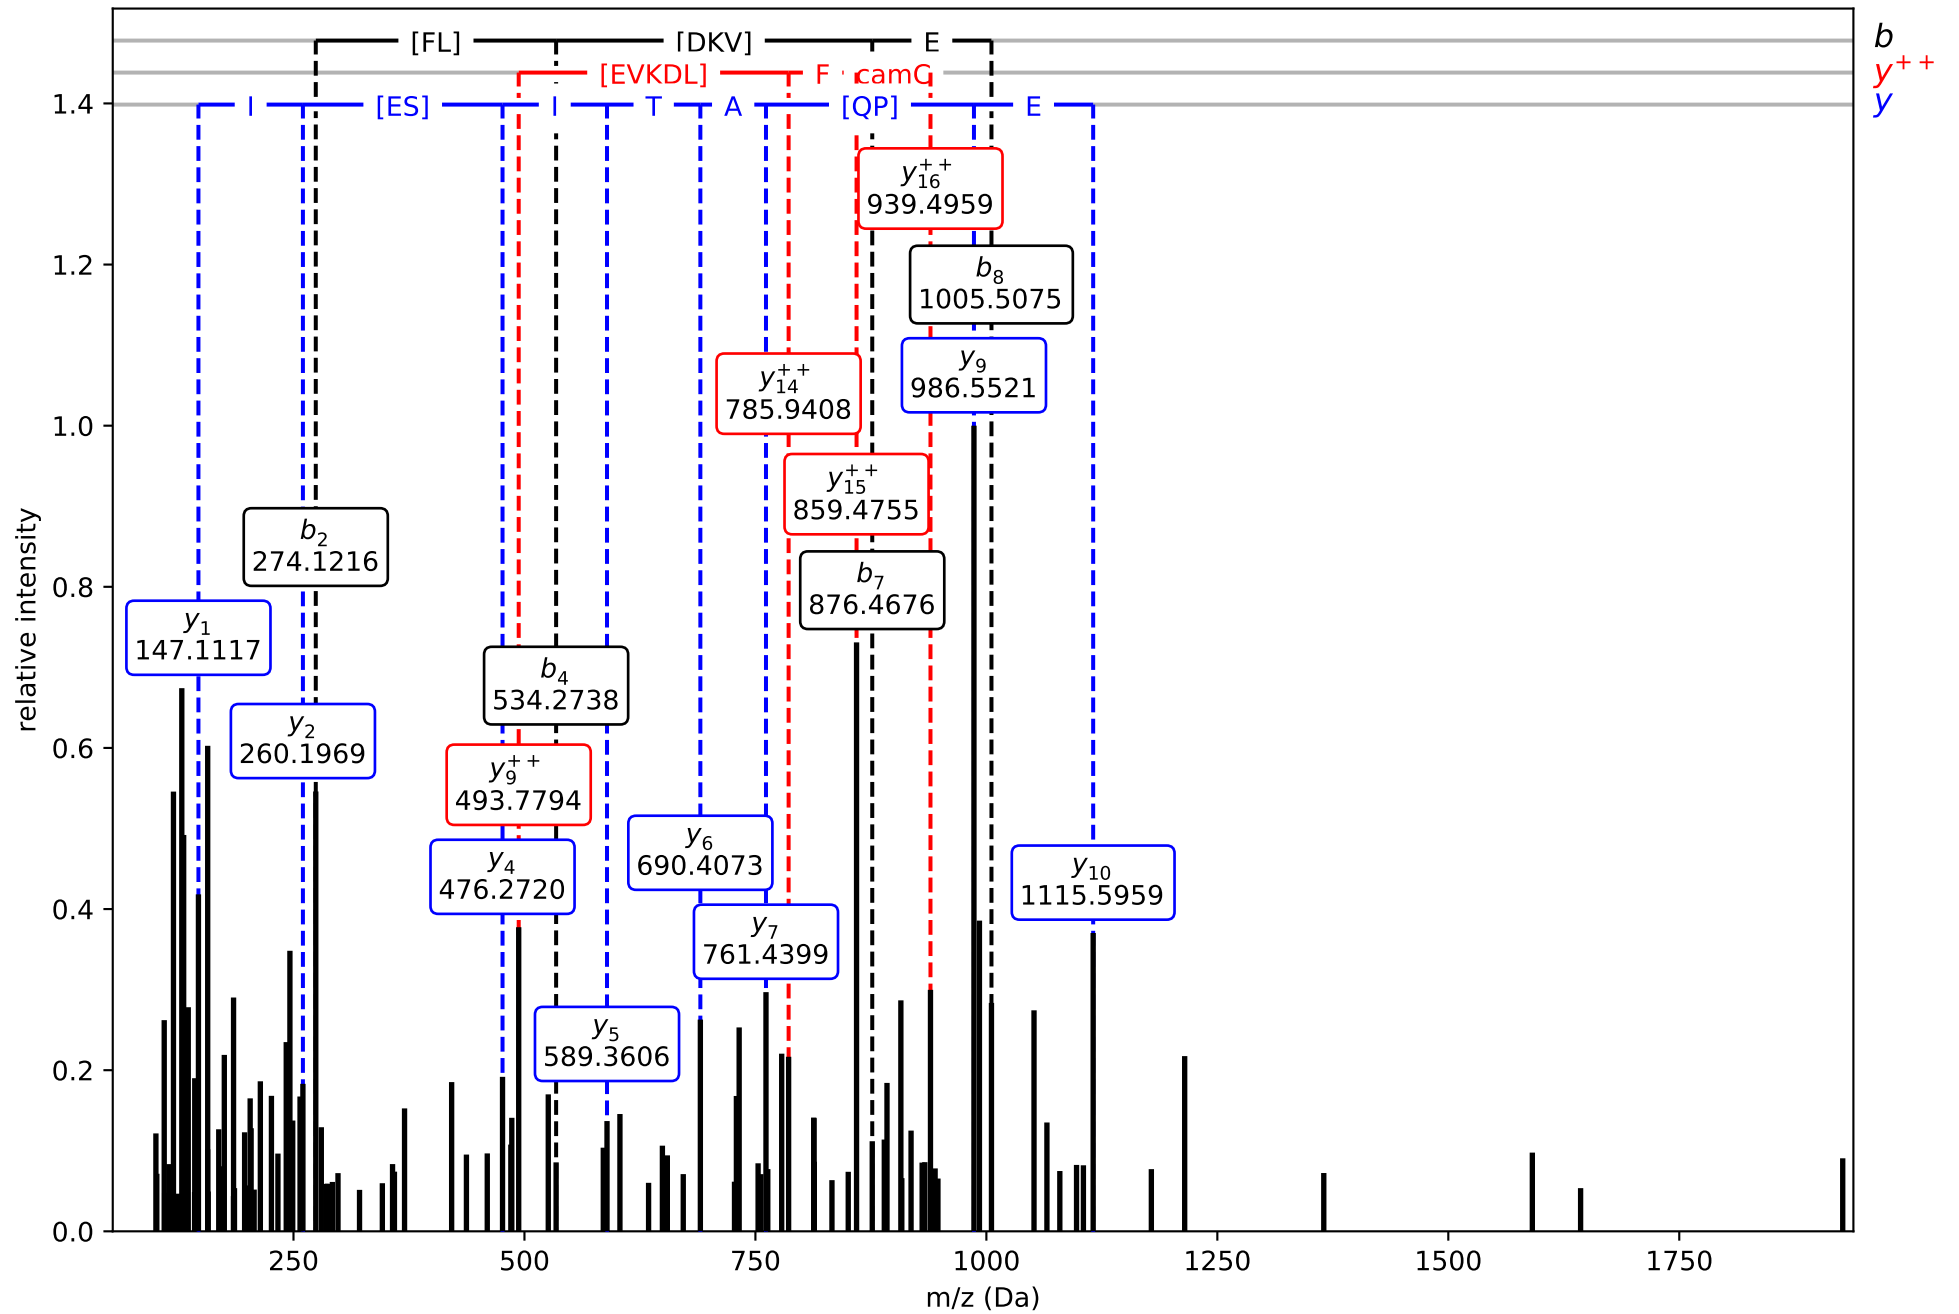

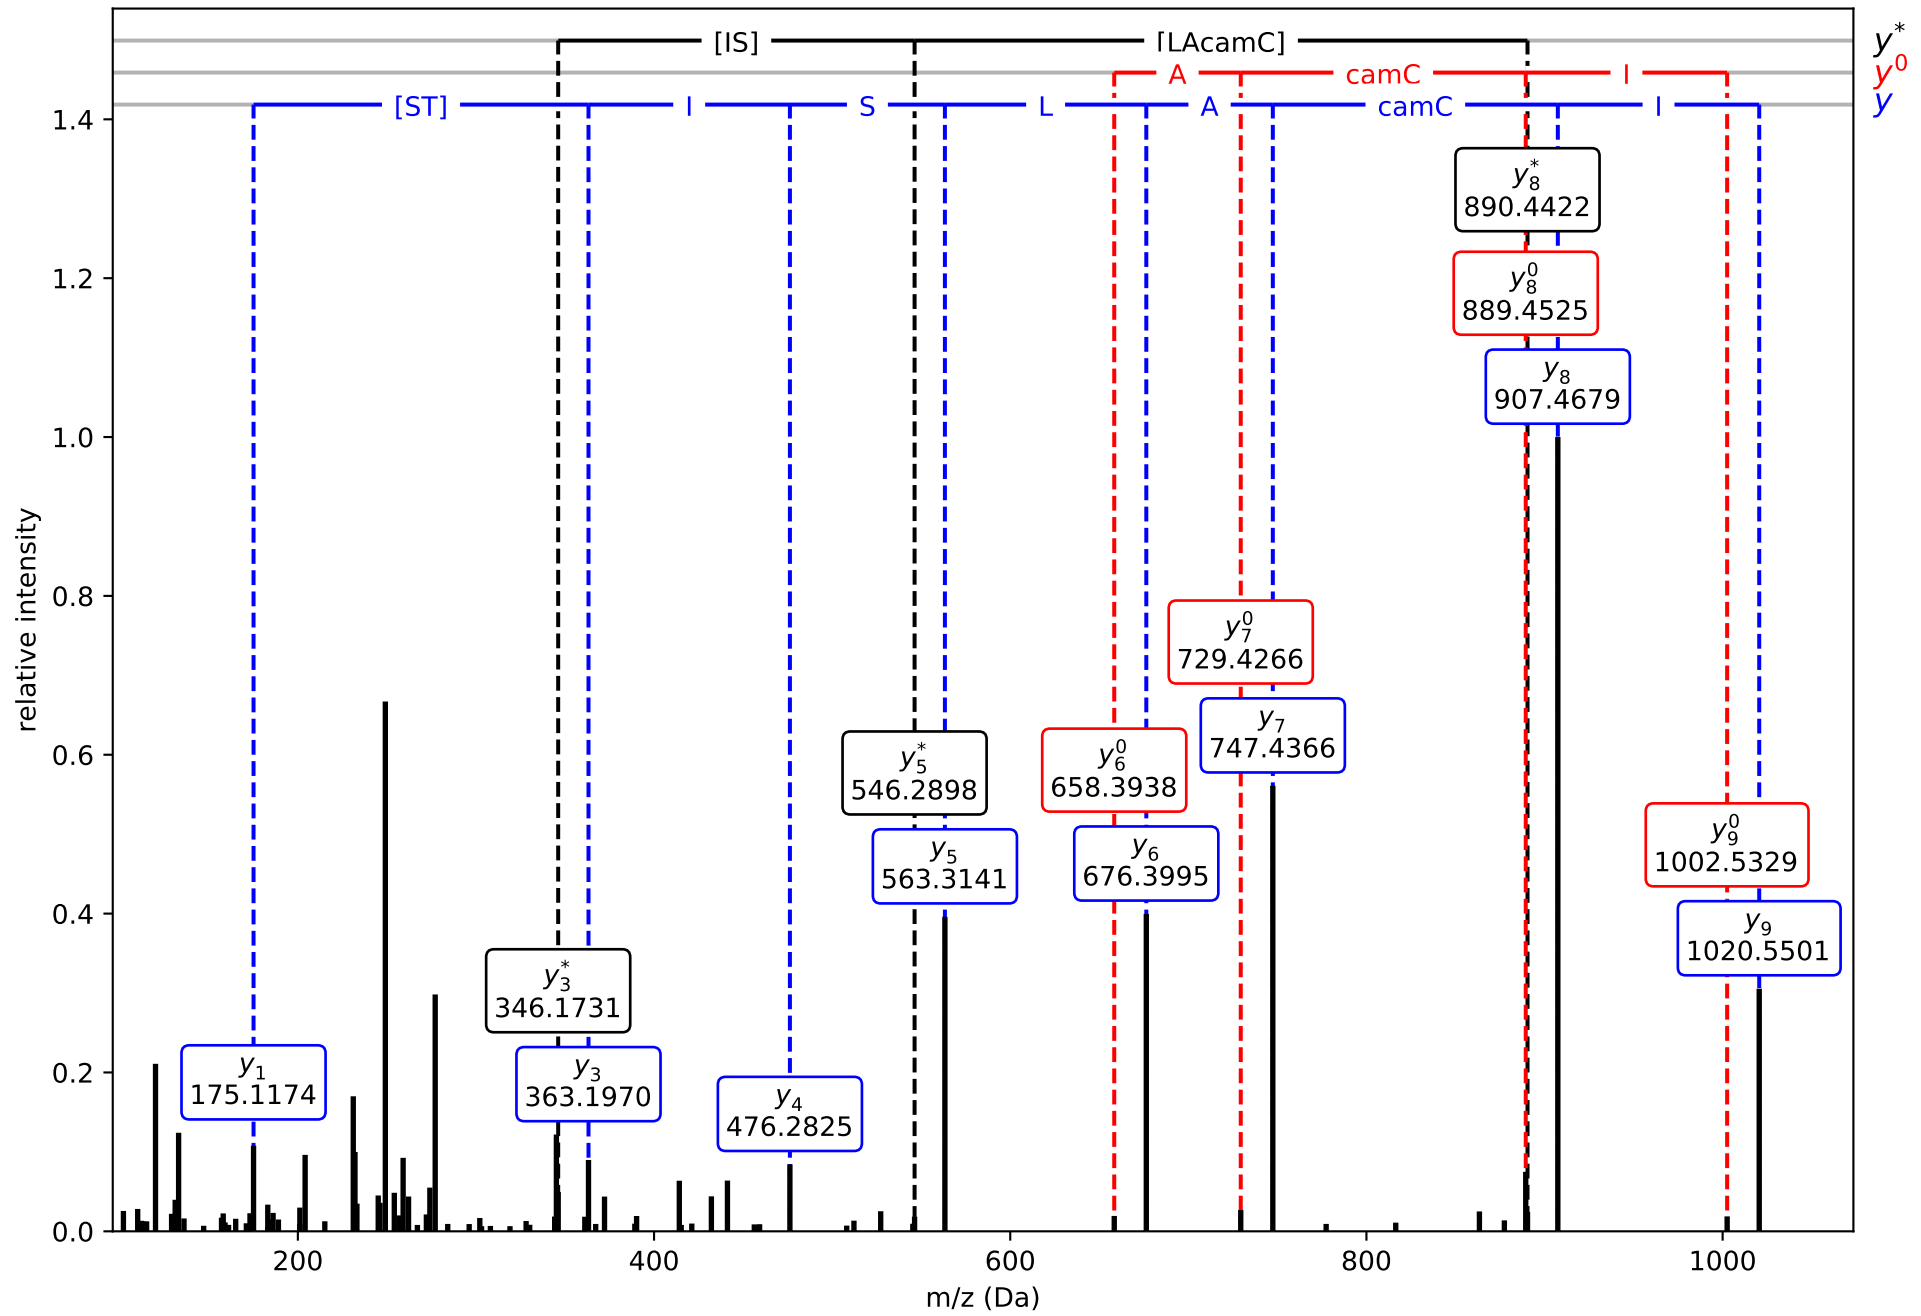

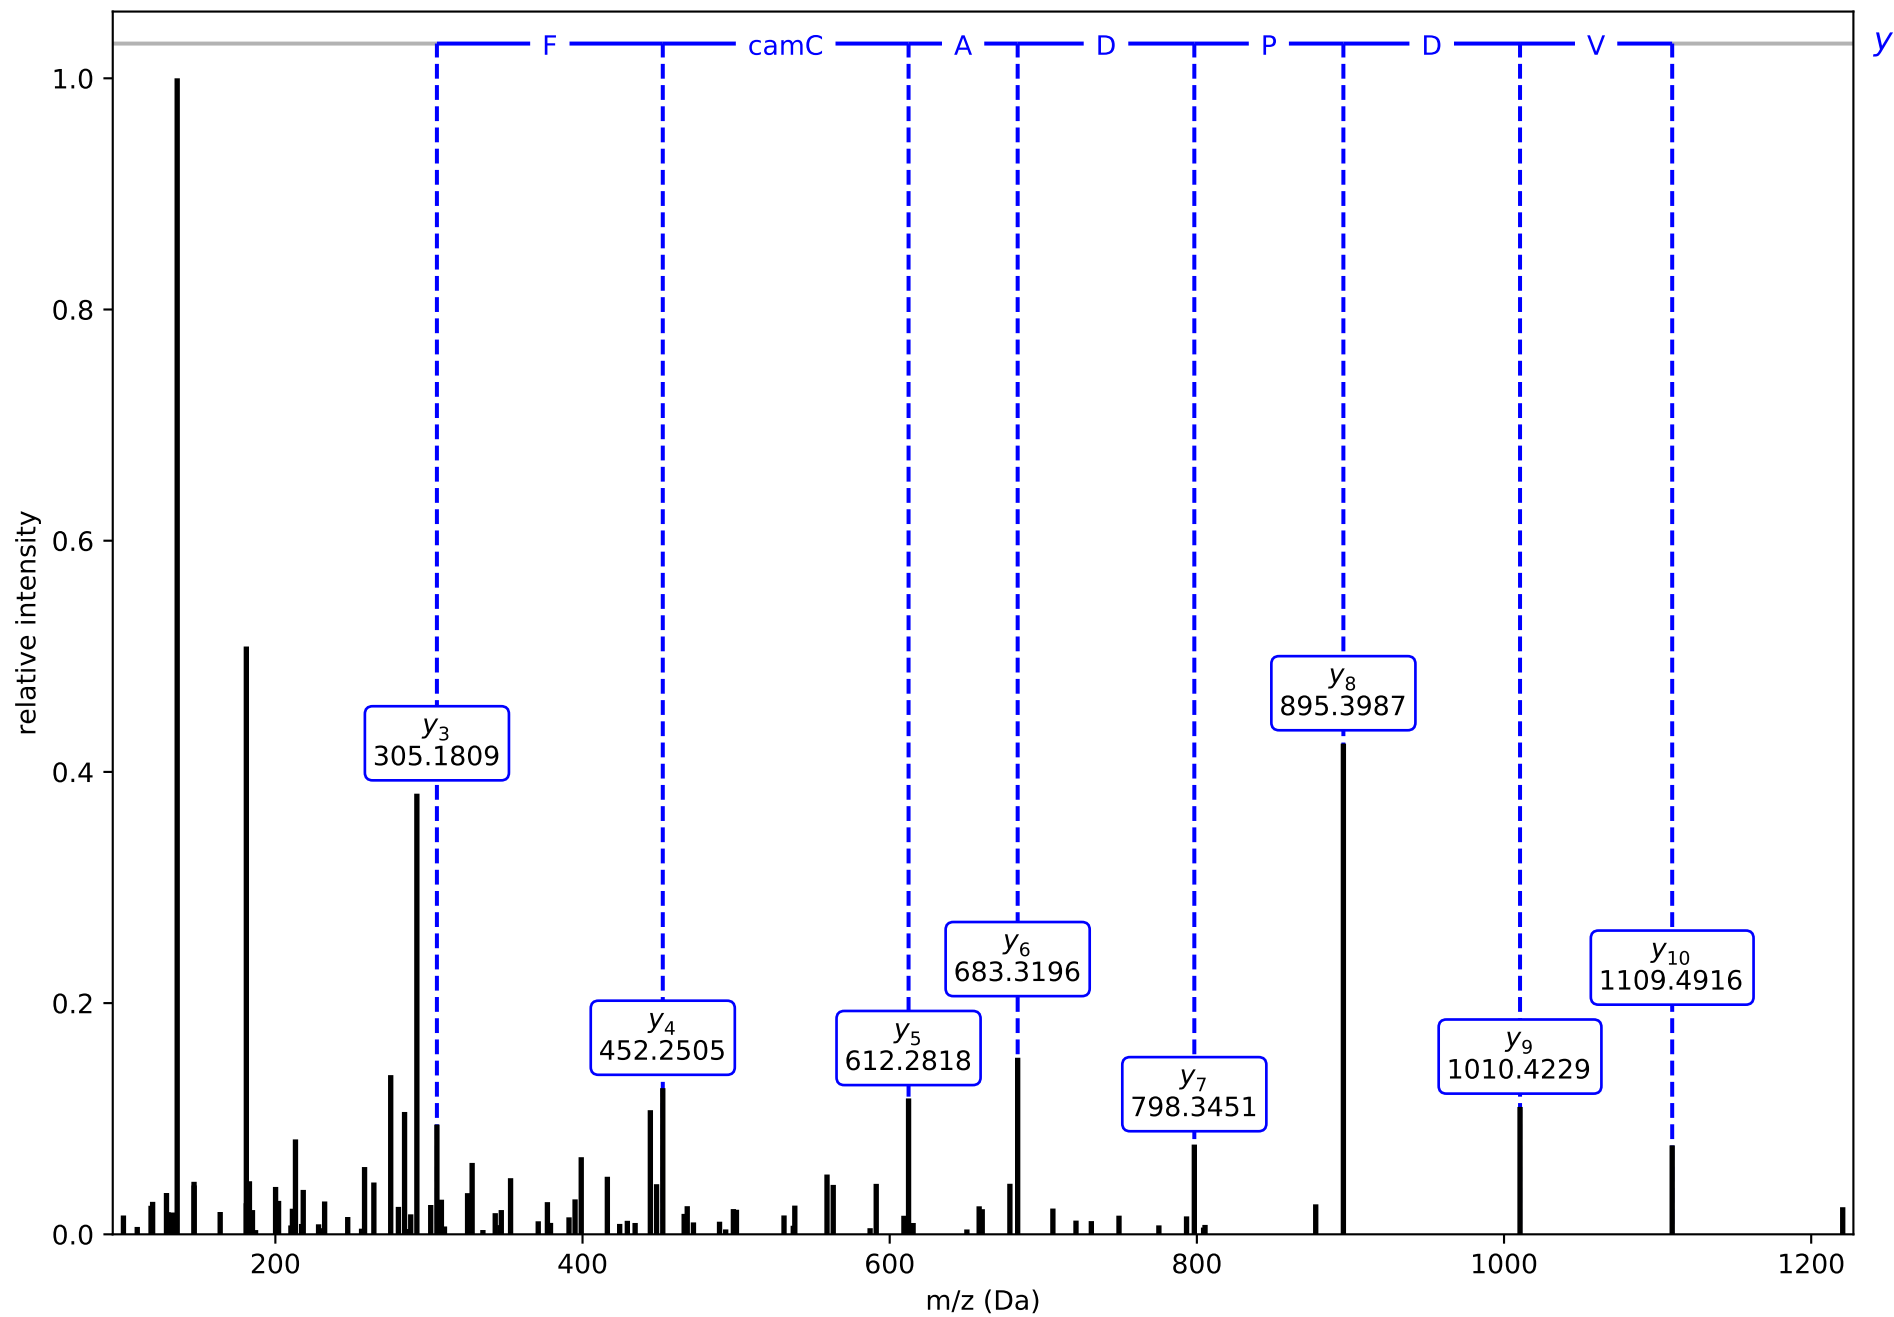

Q60931 : VcamCNYGLTFTQK

parent: 665.8279, 2+

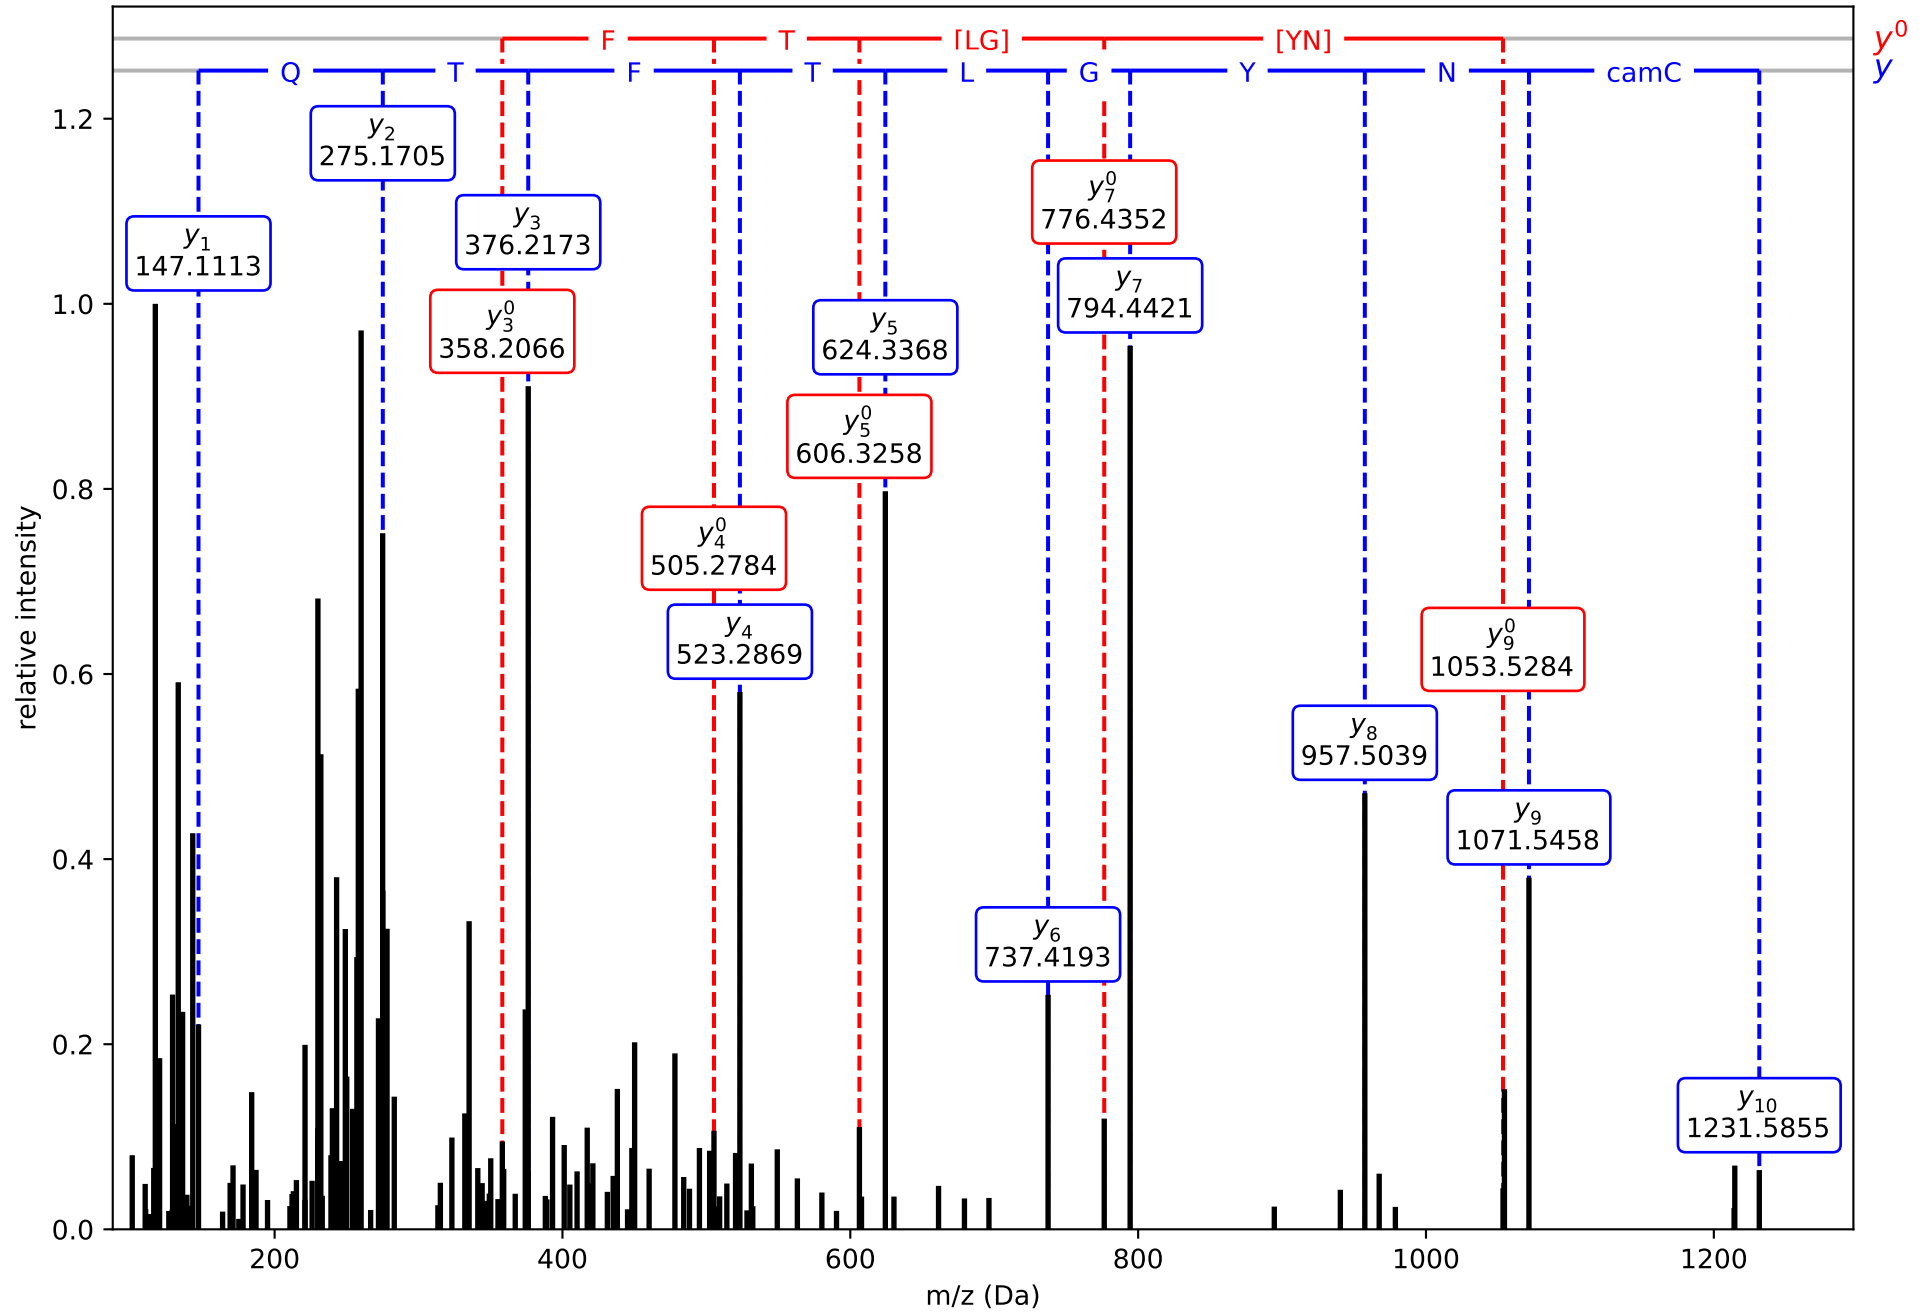

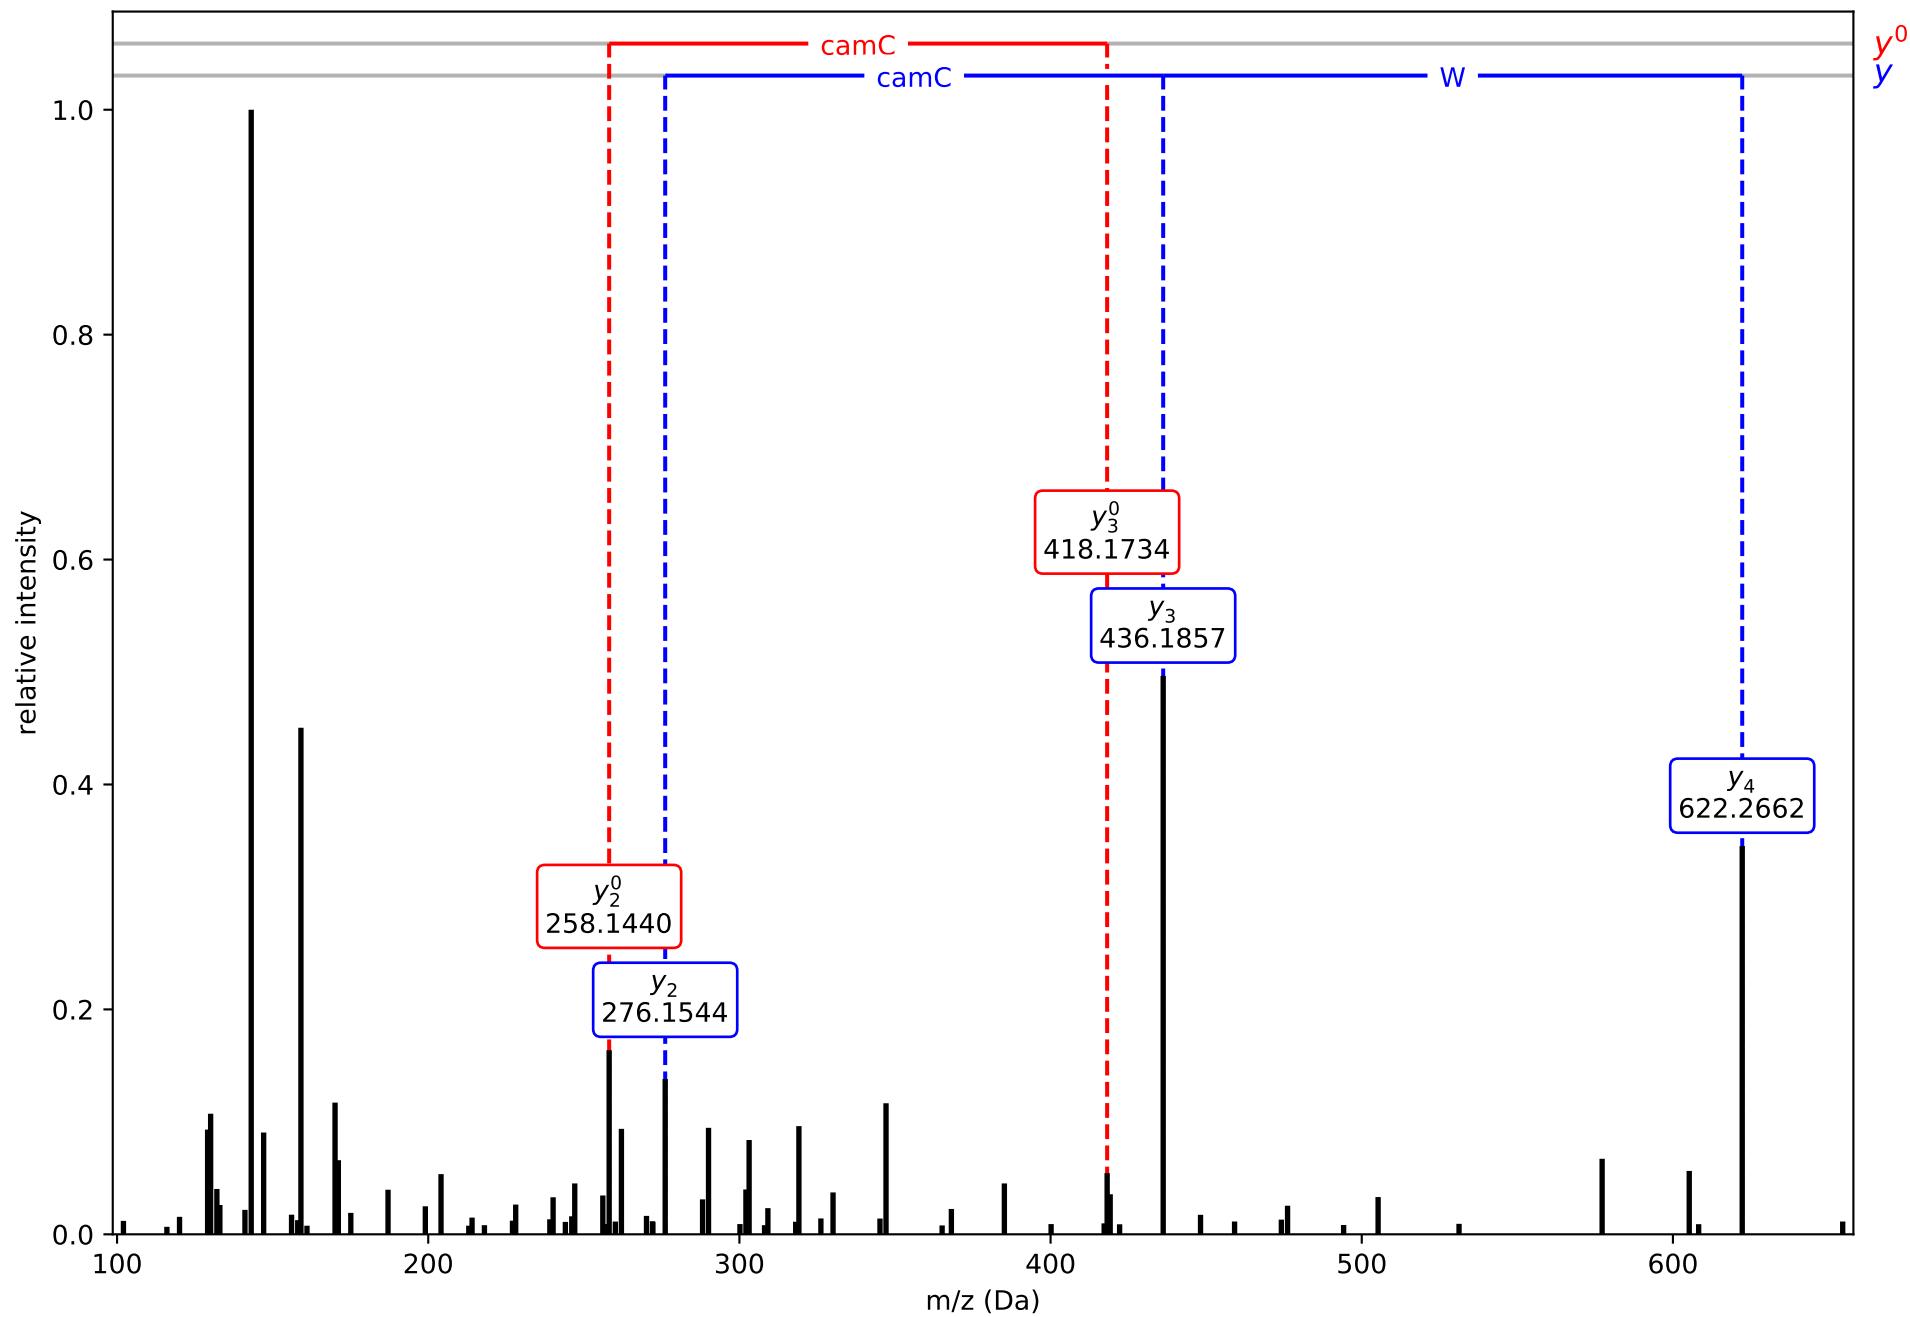

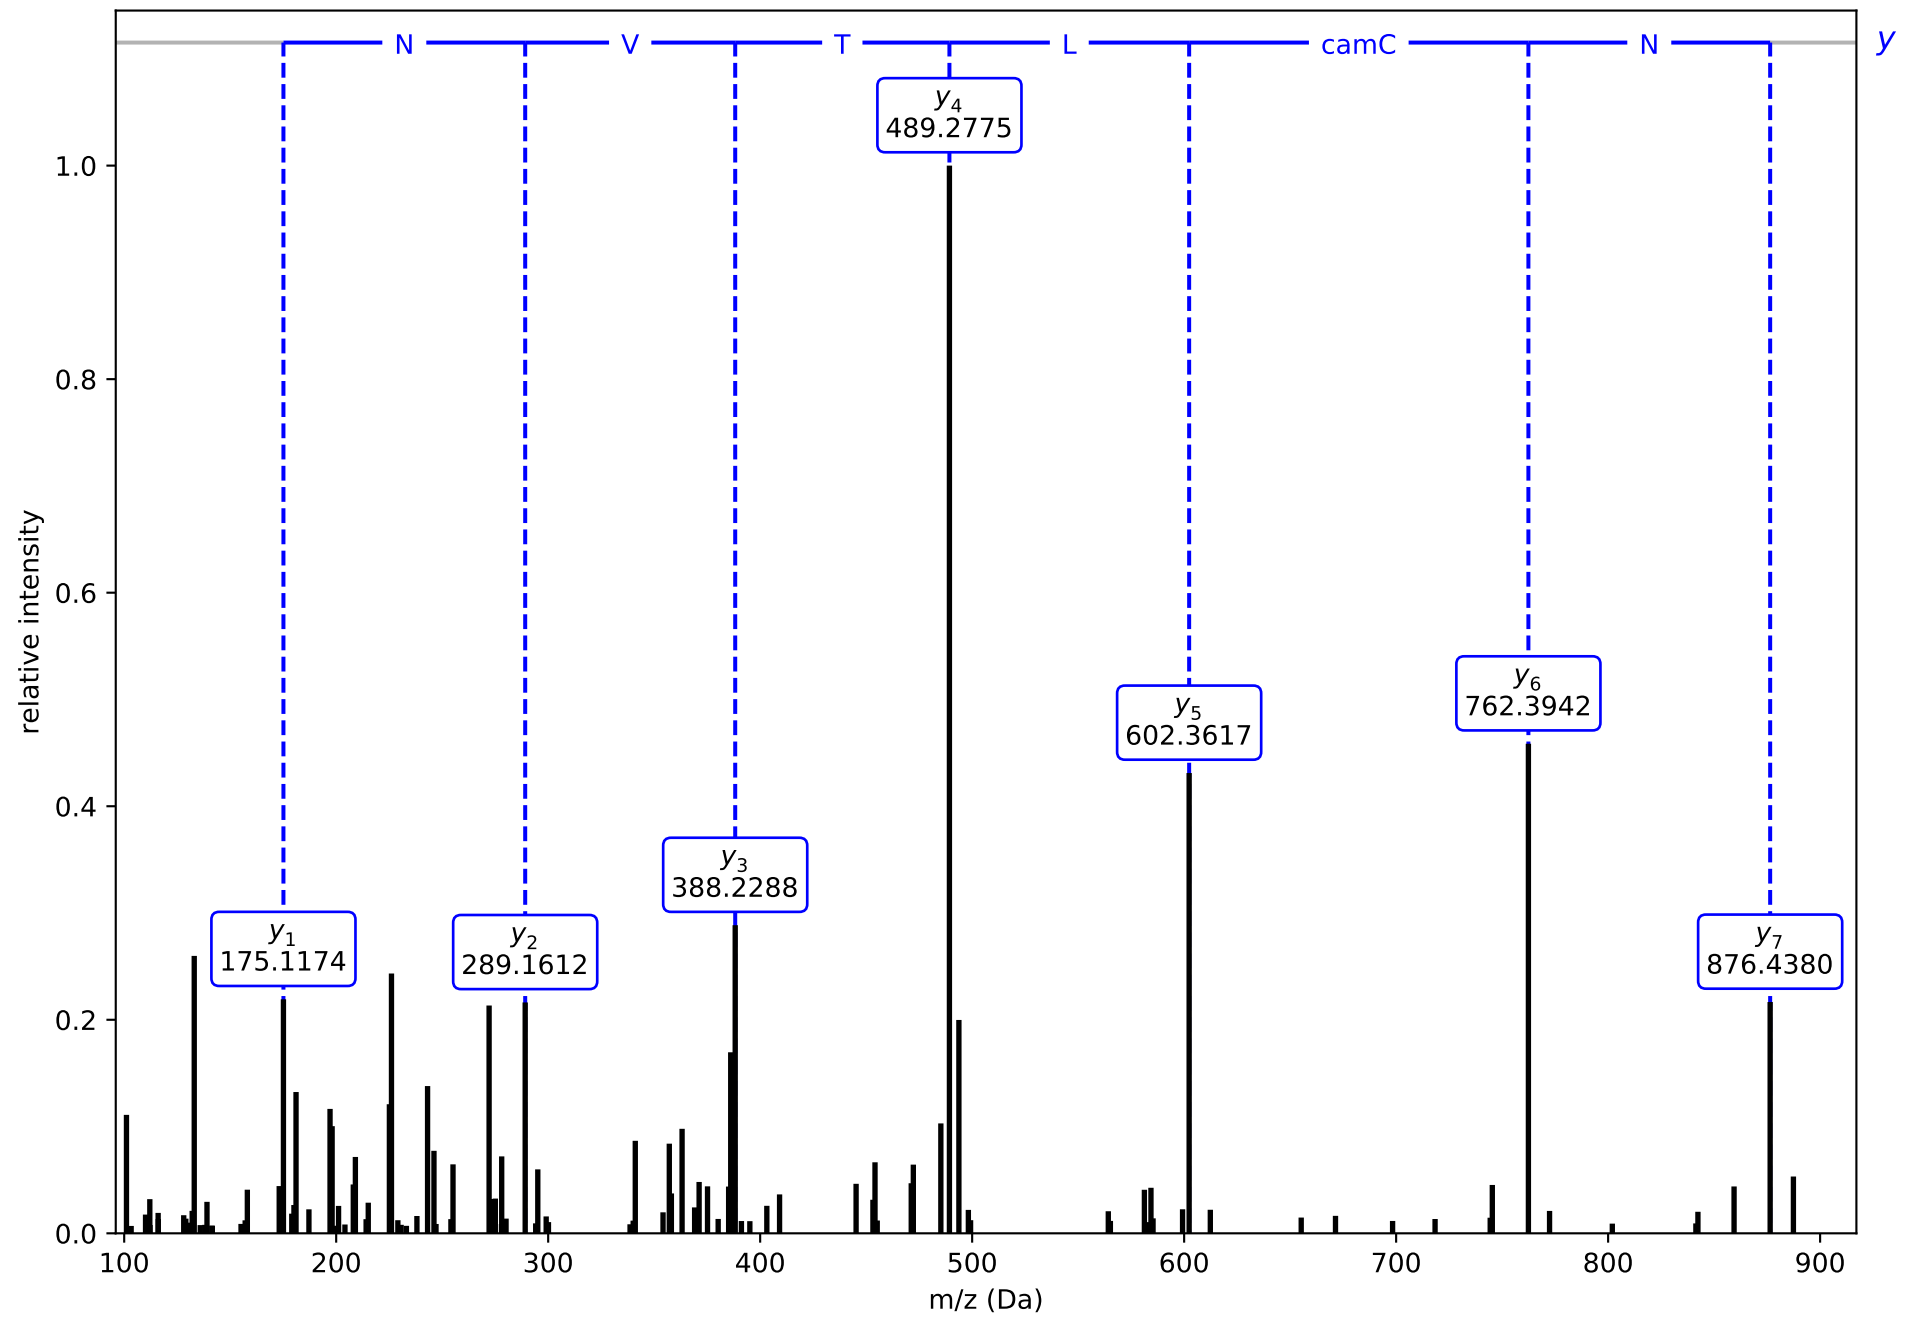

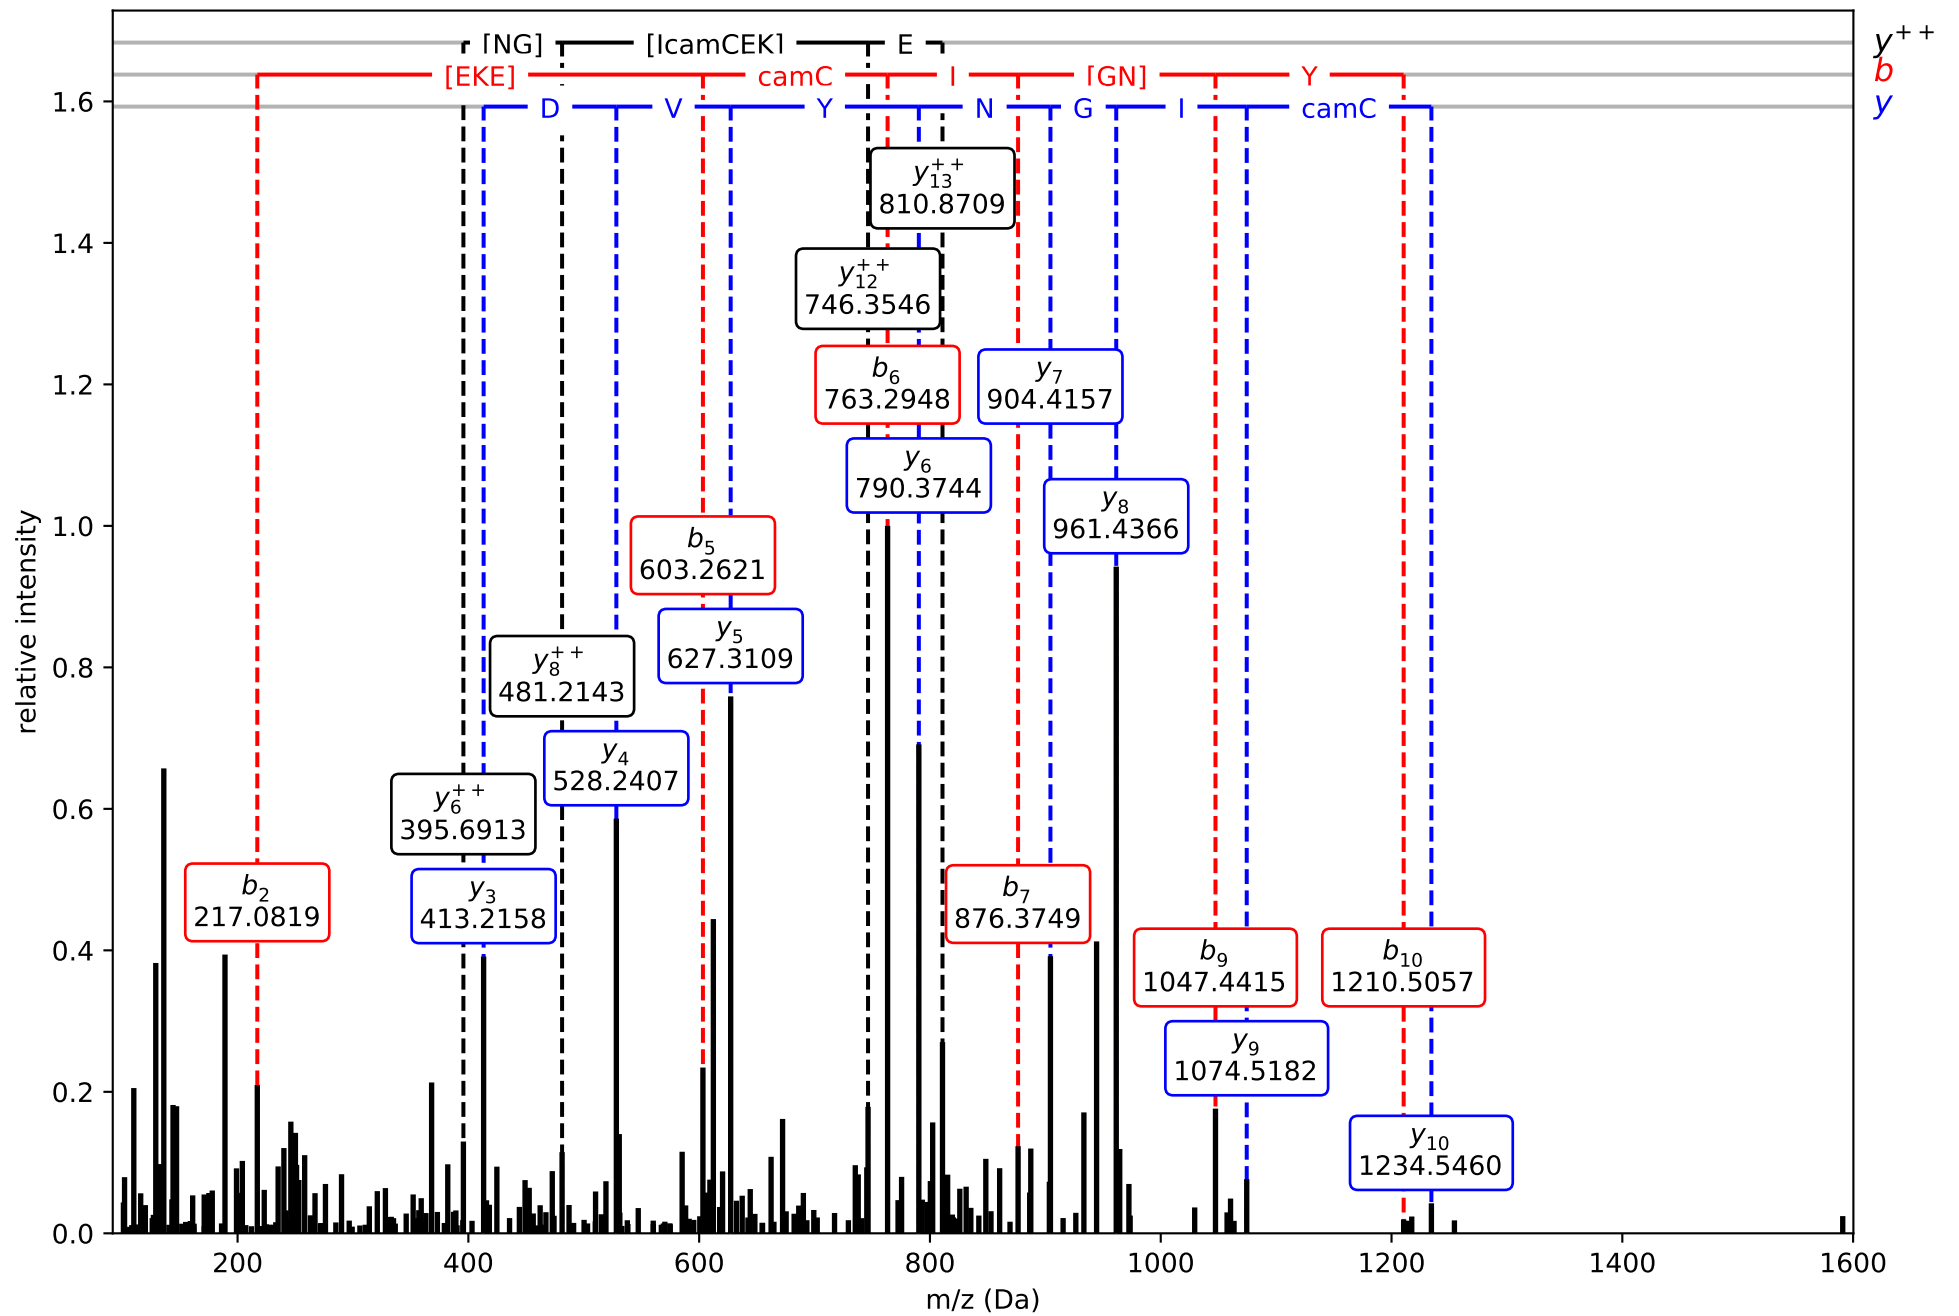

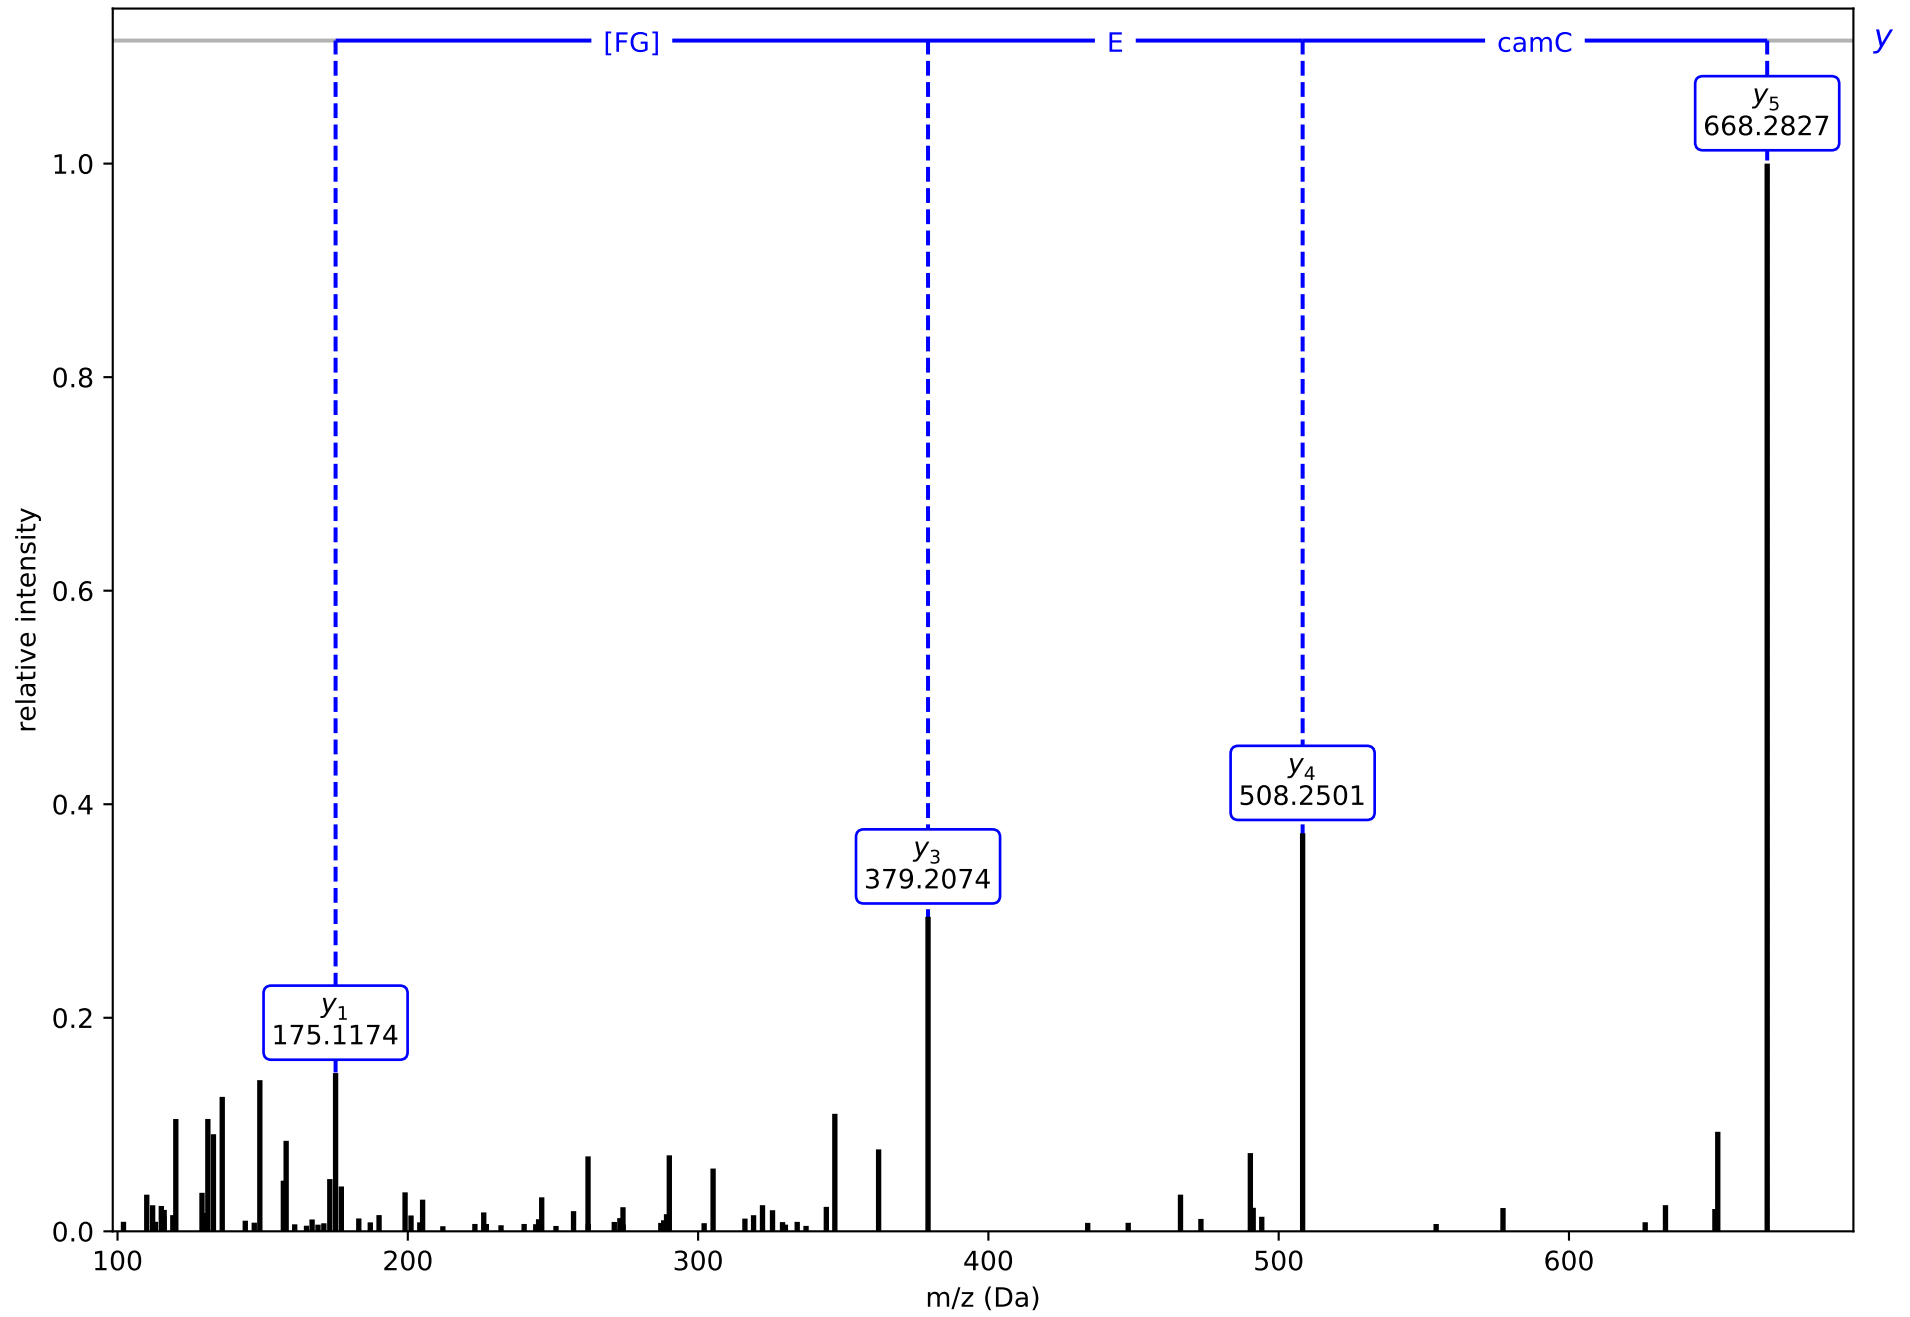



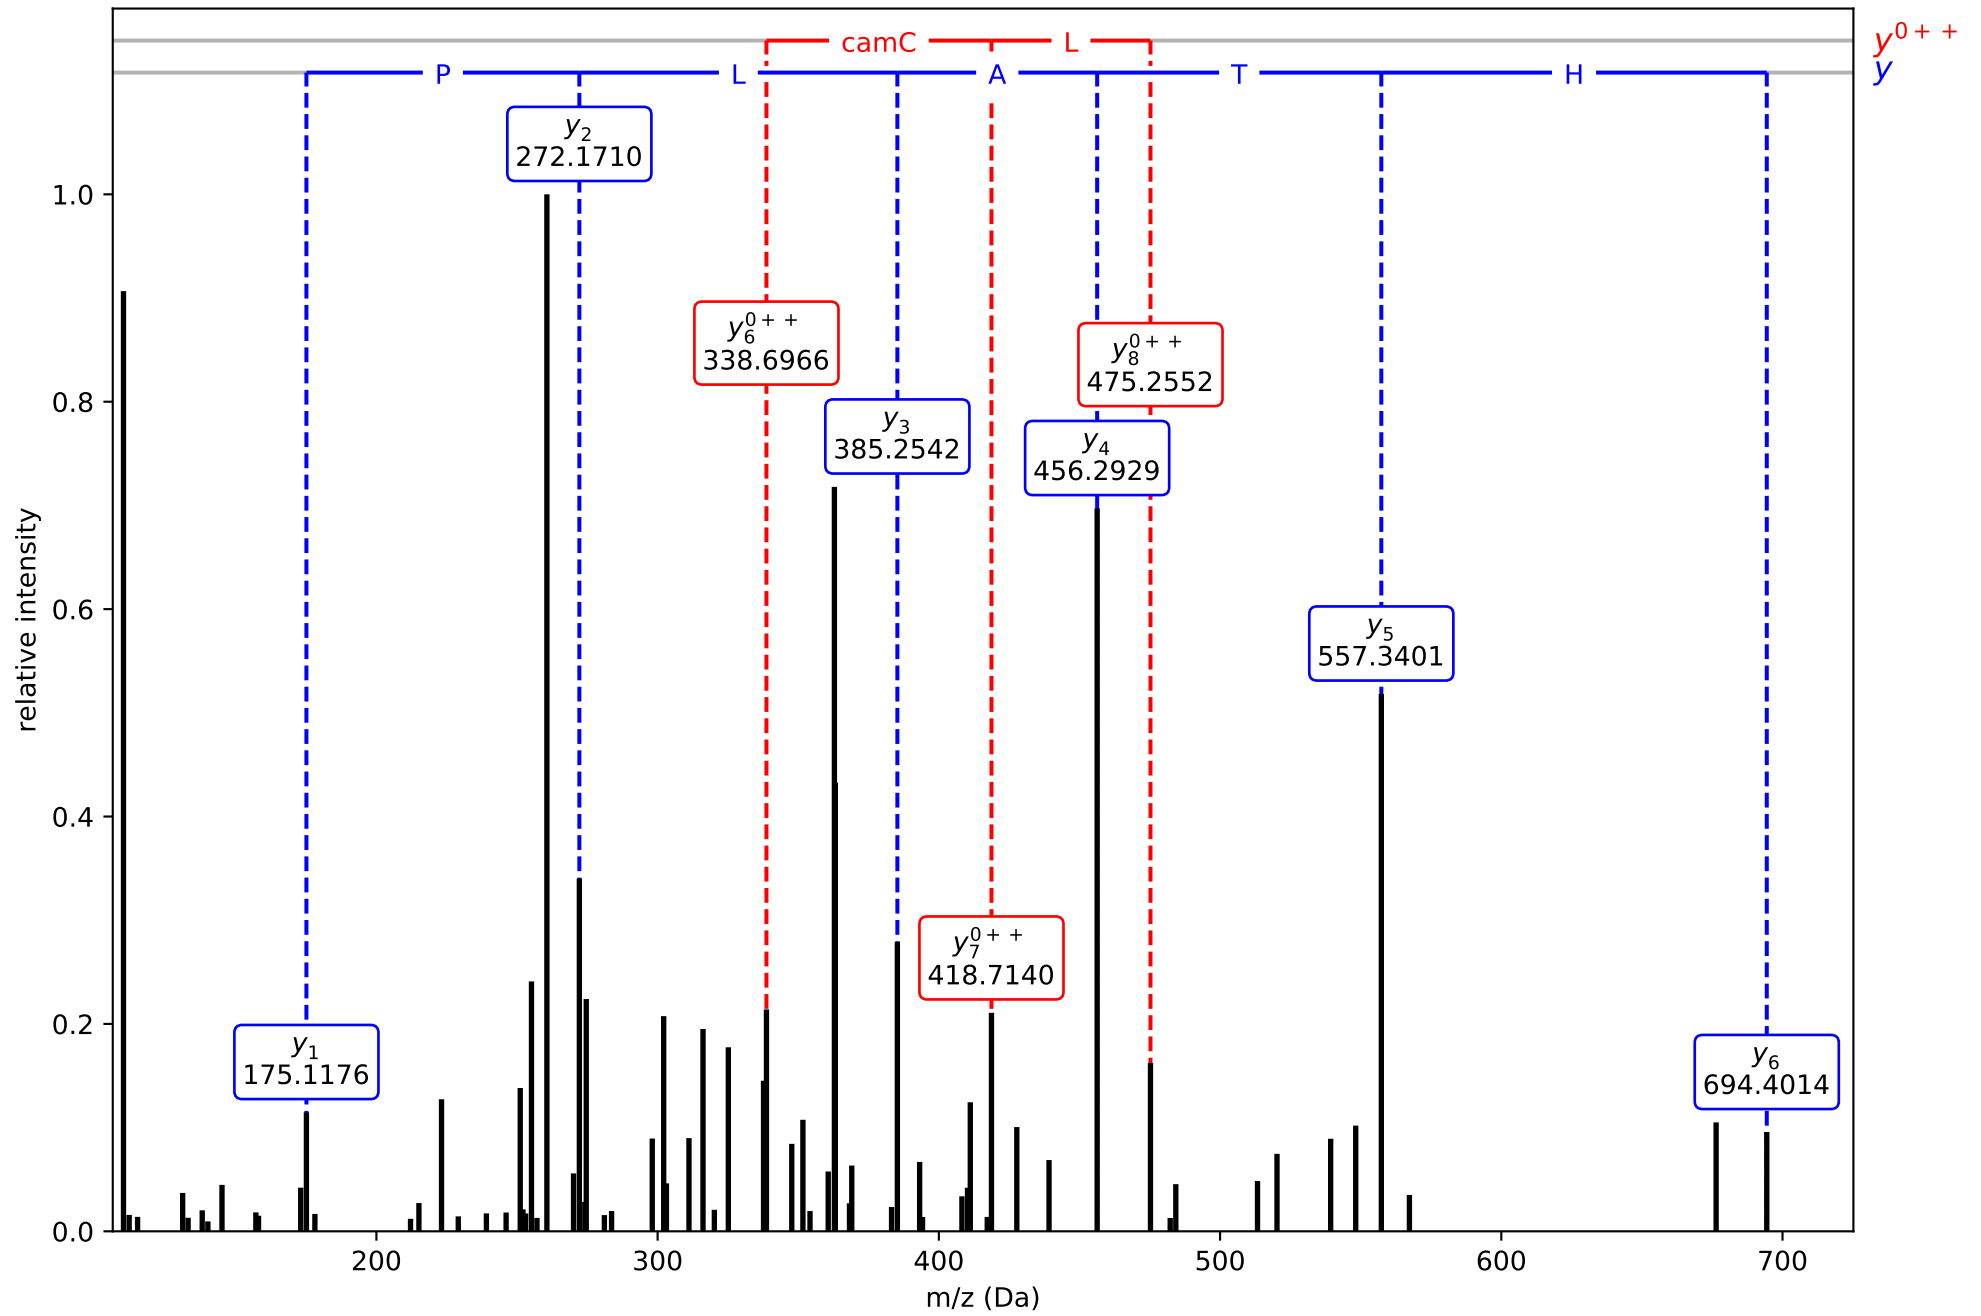

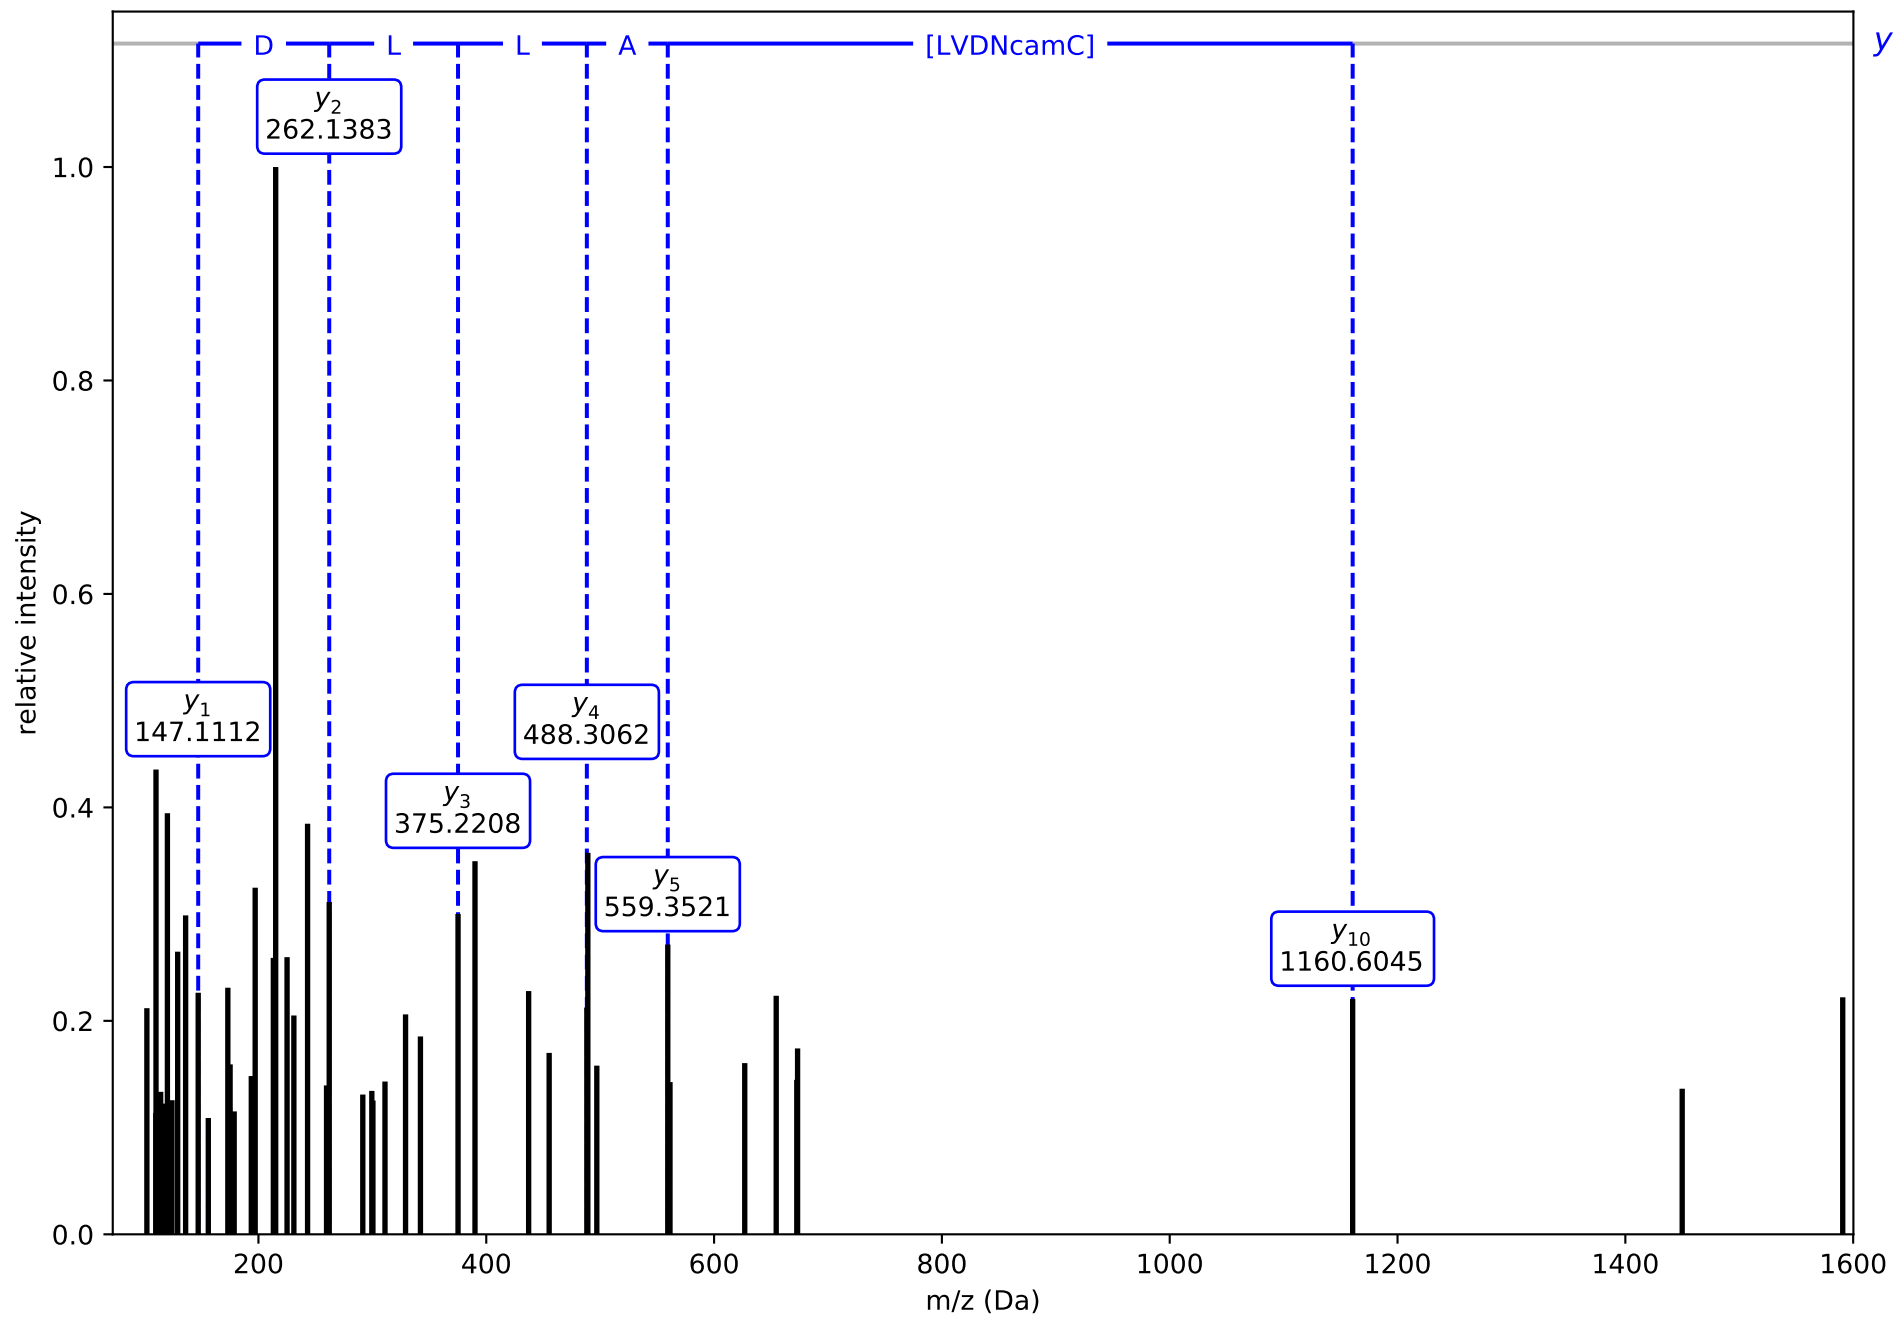

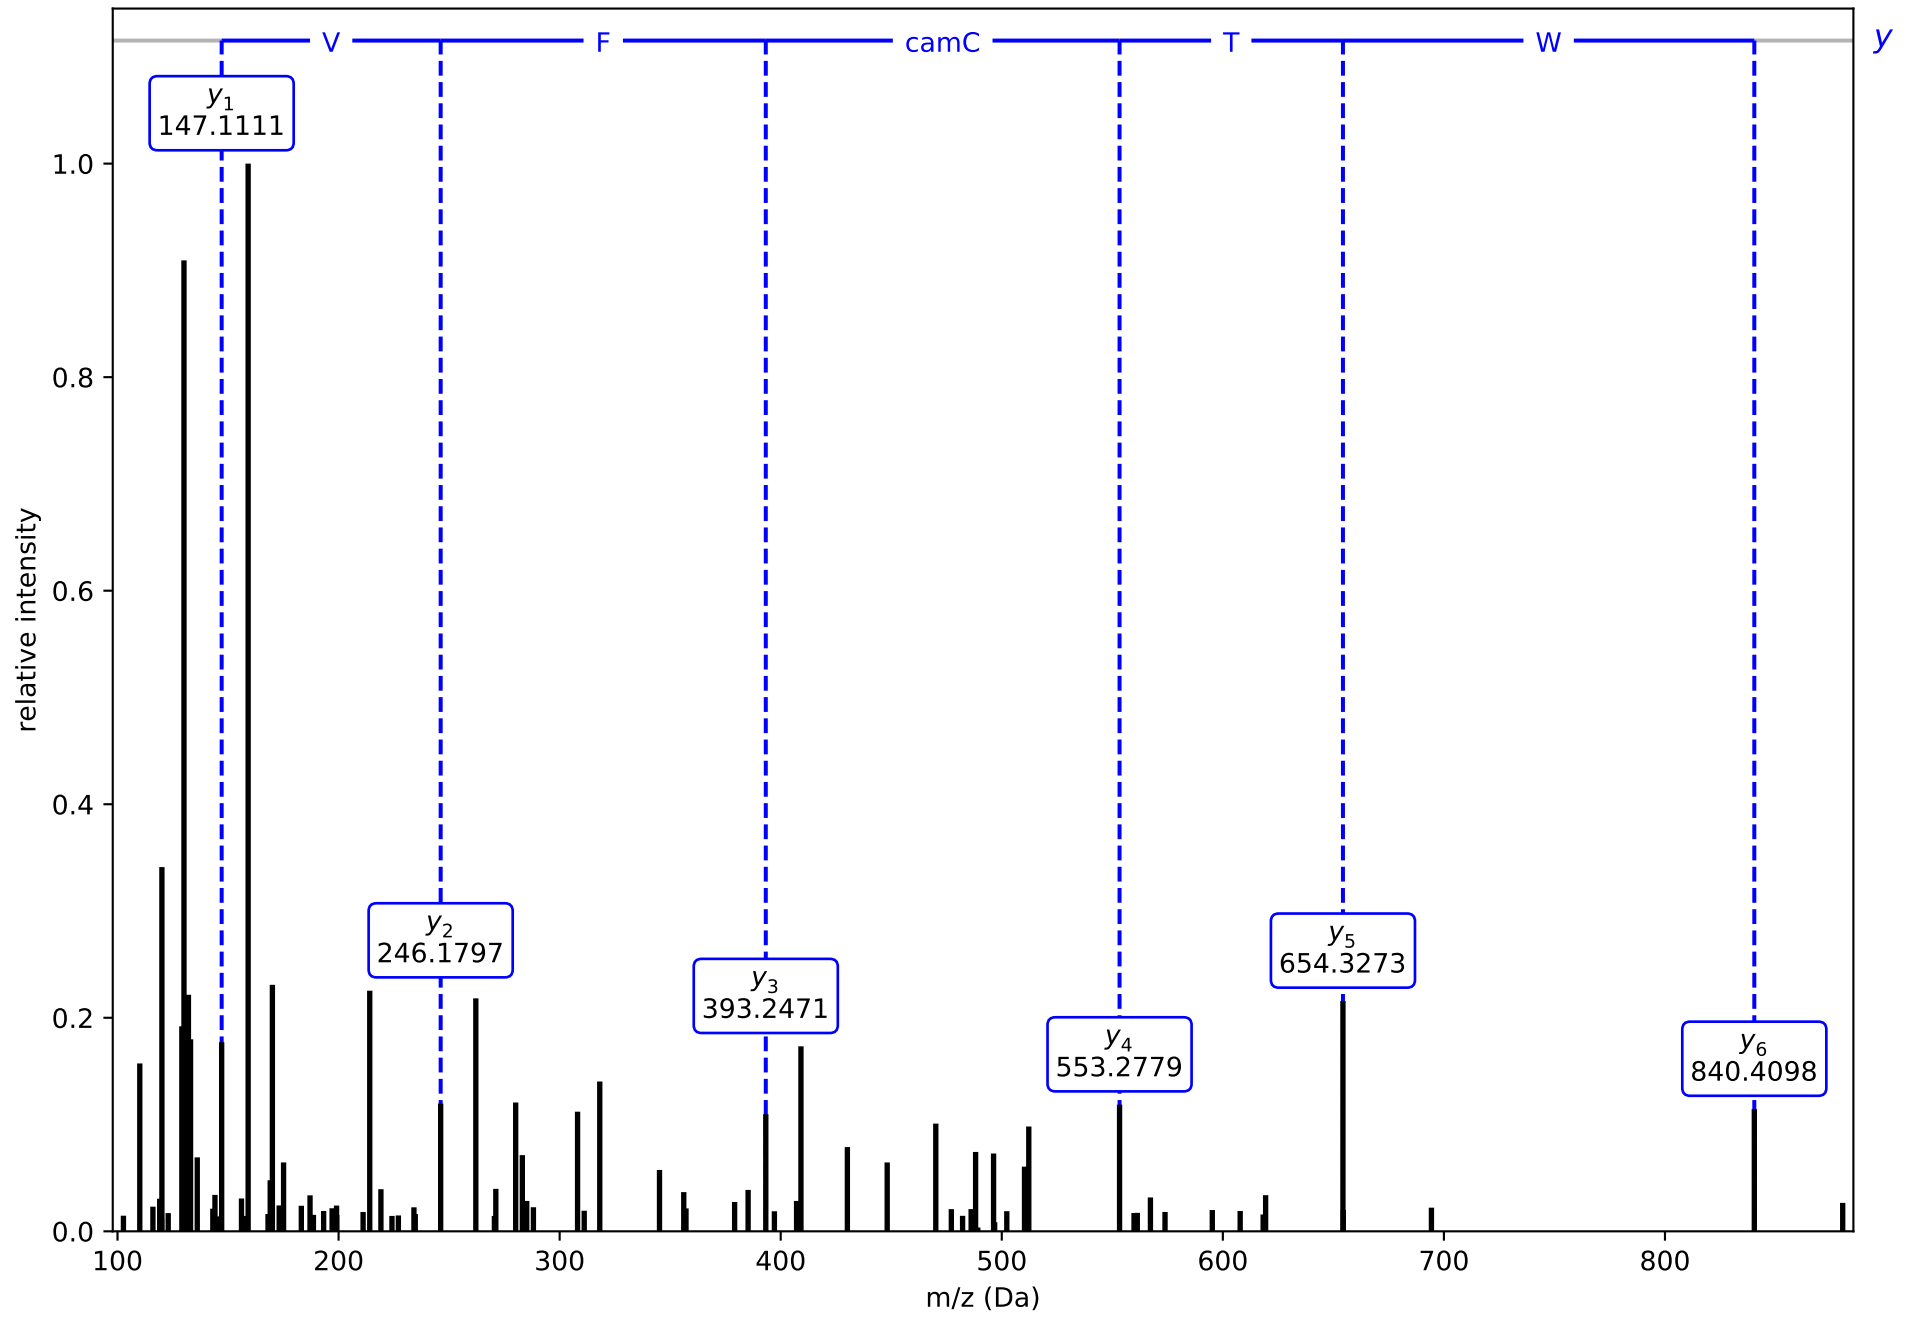

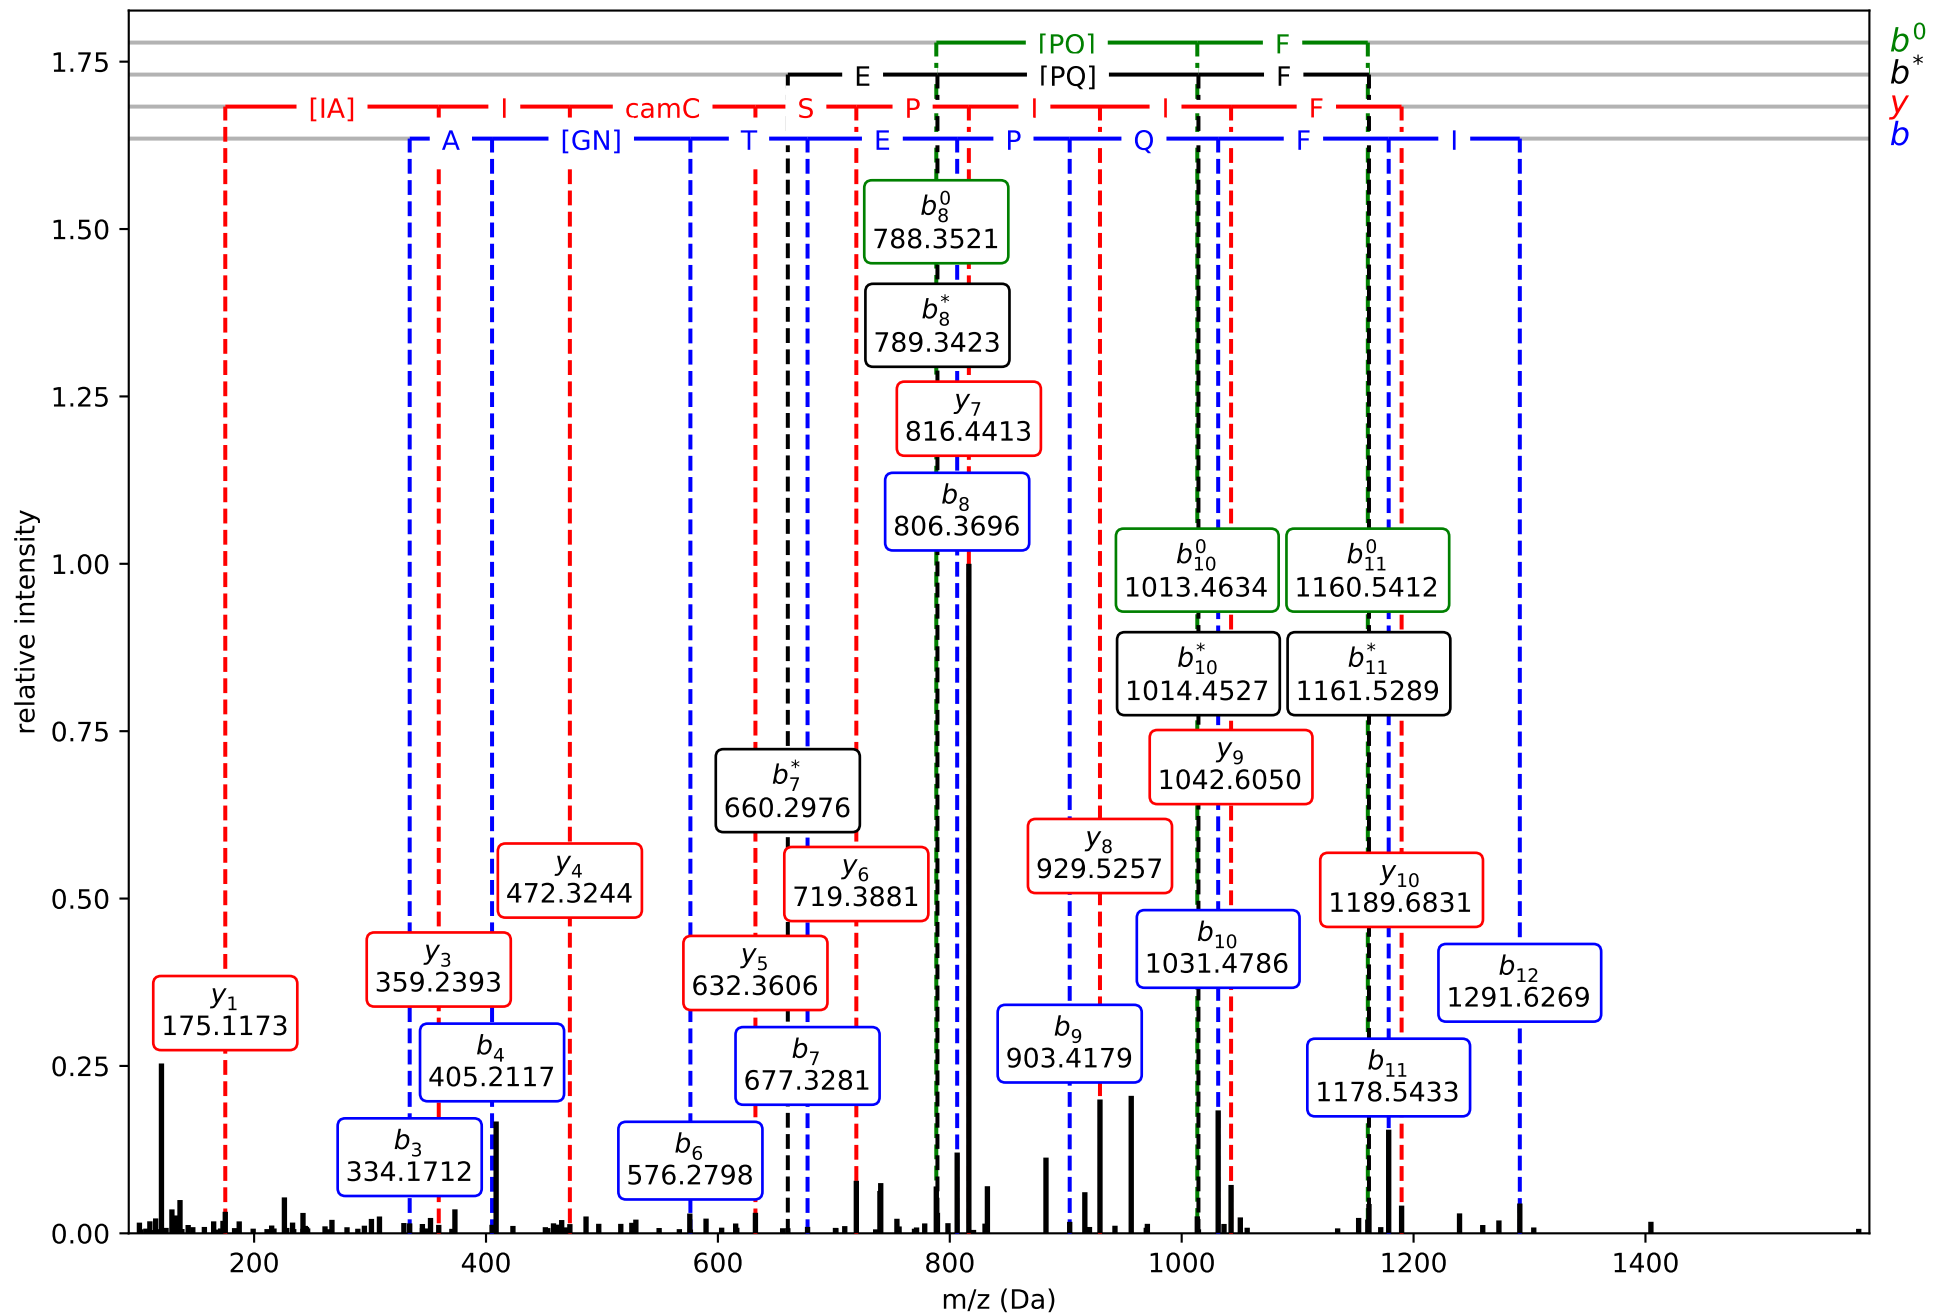

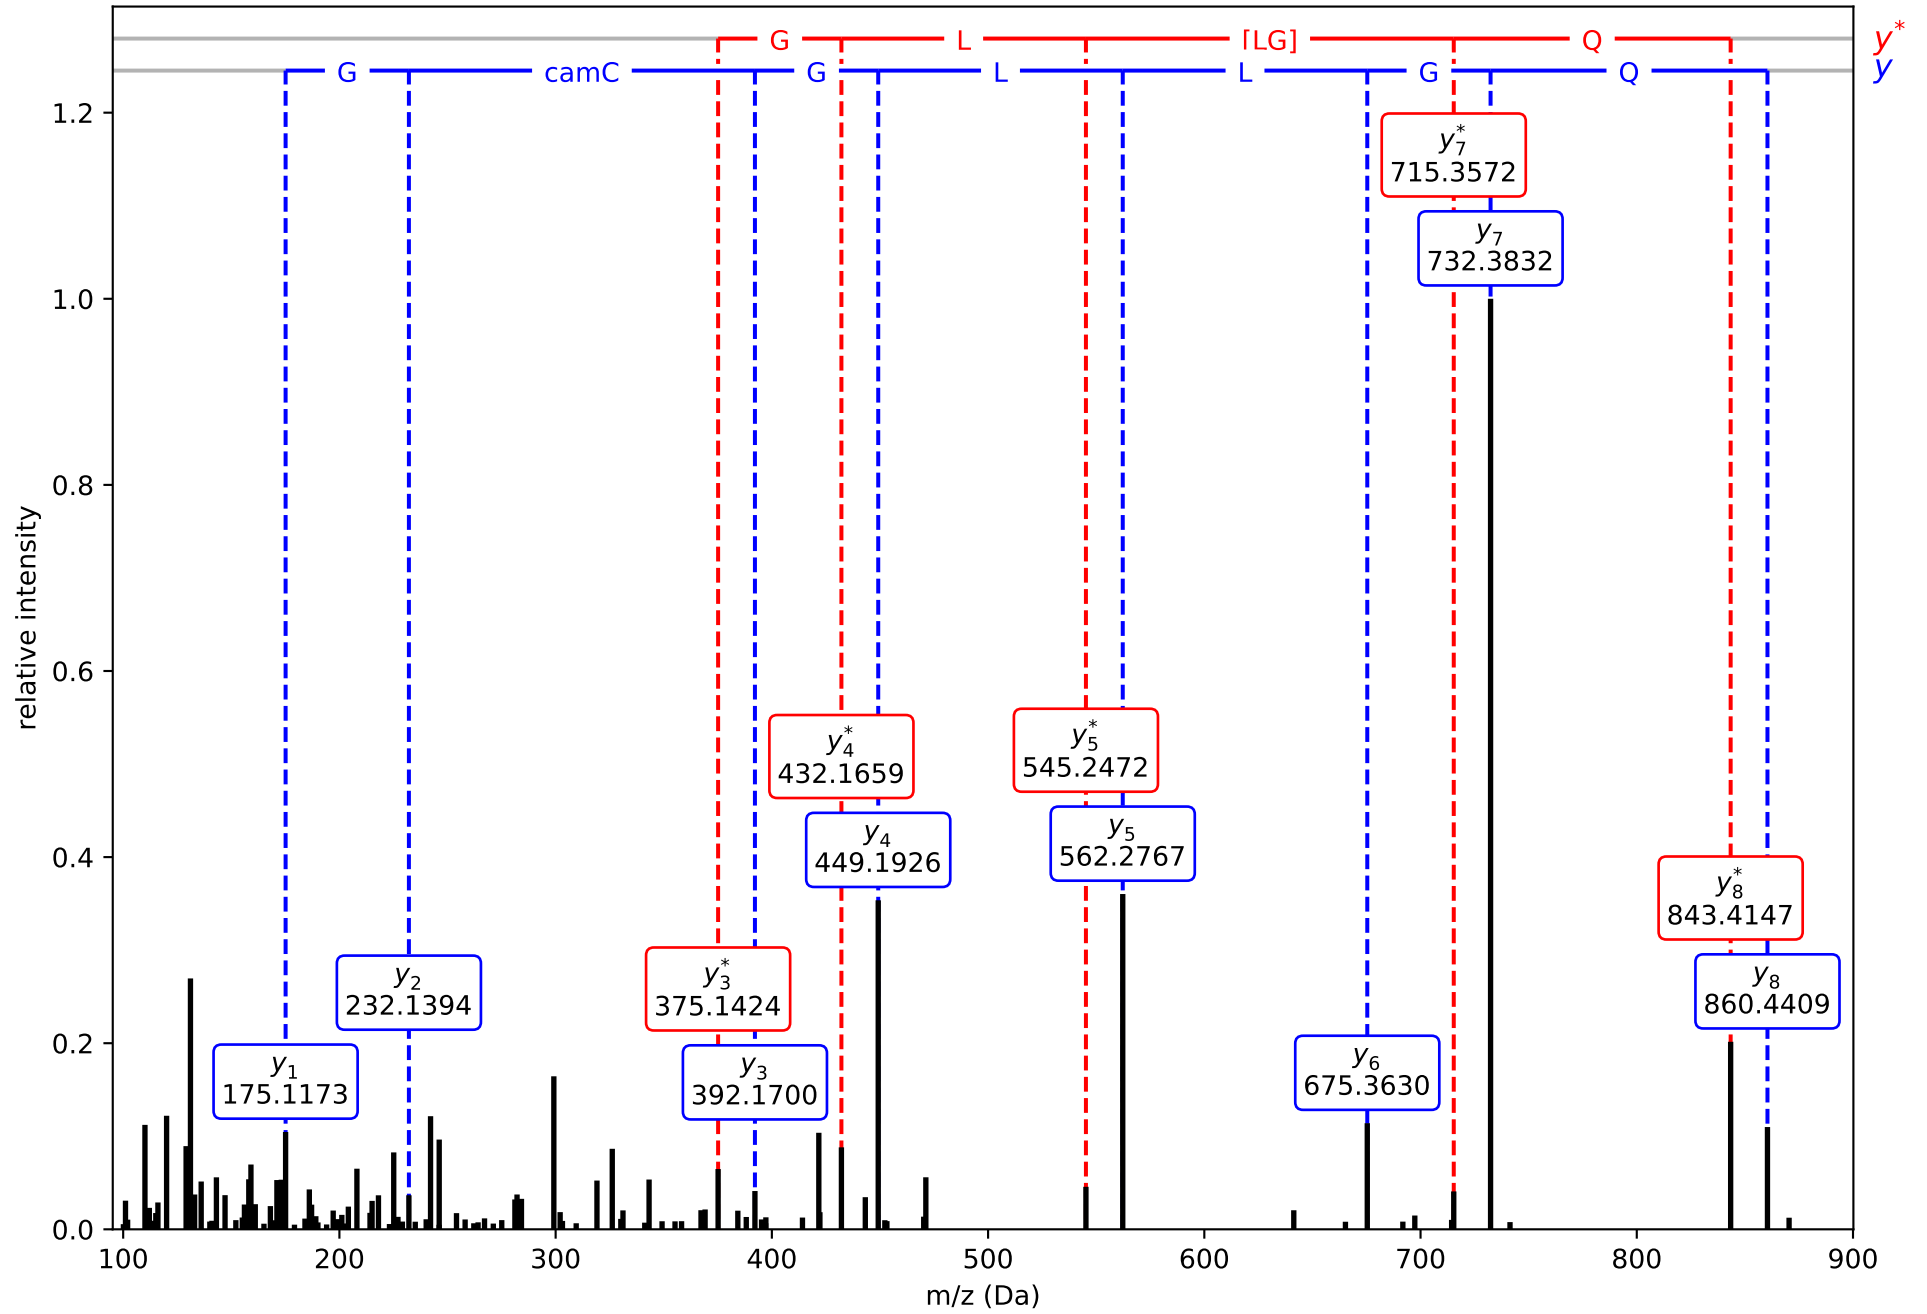

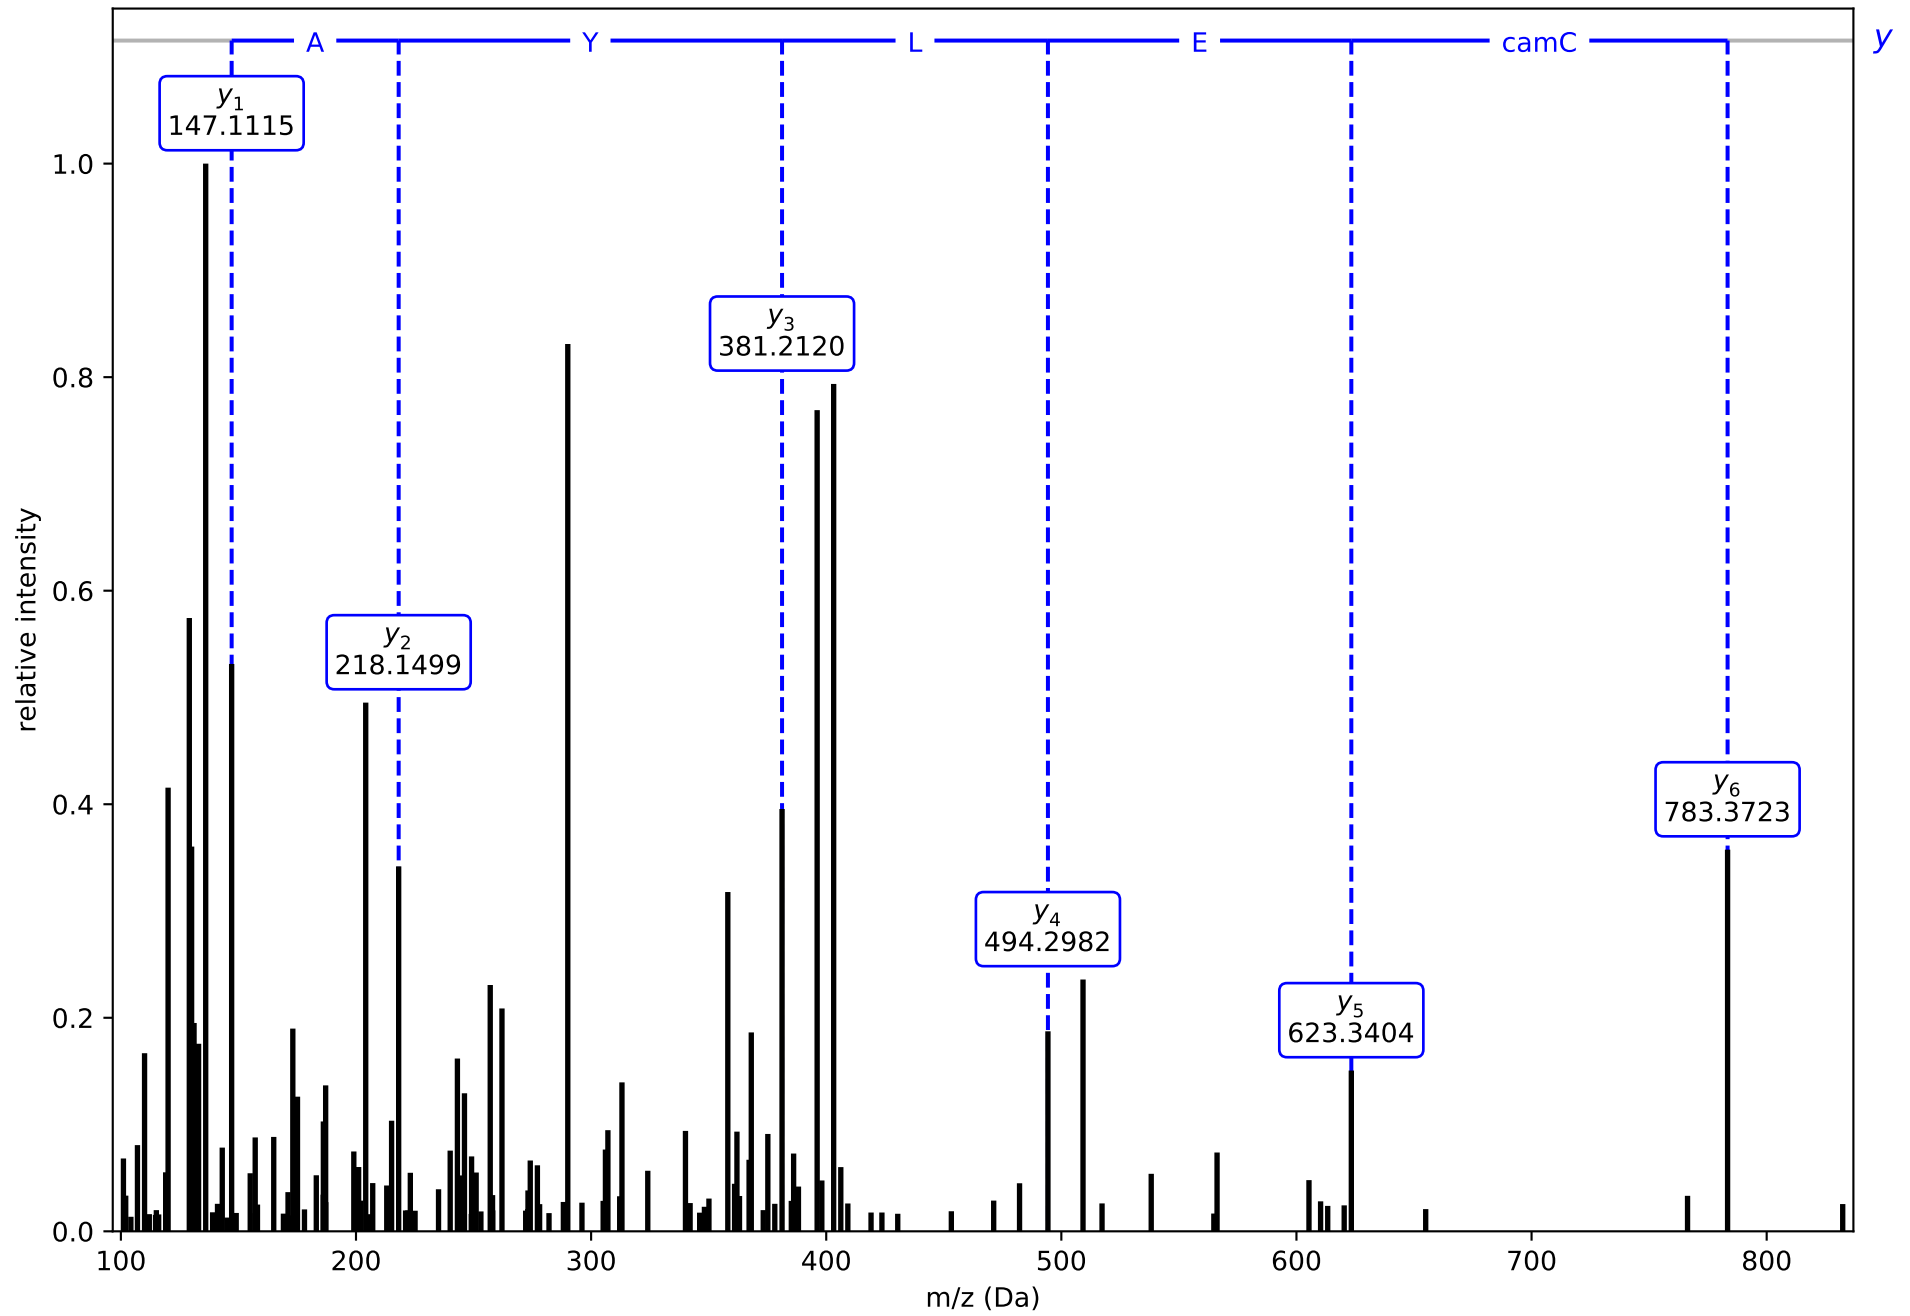

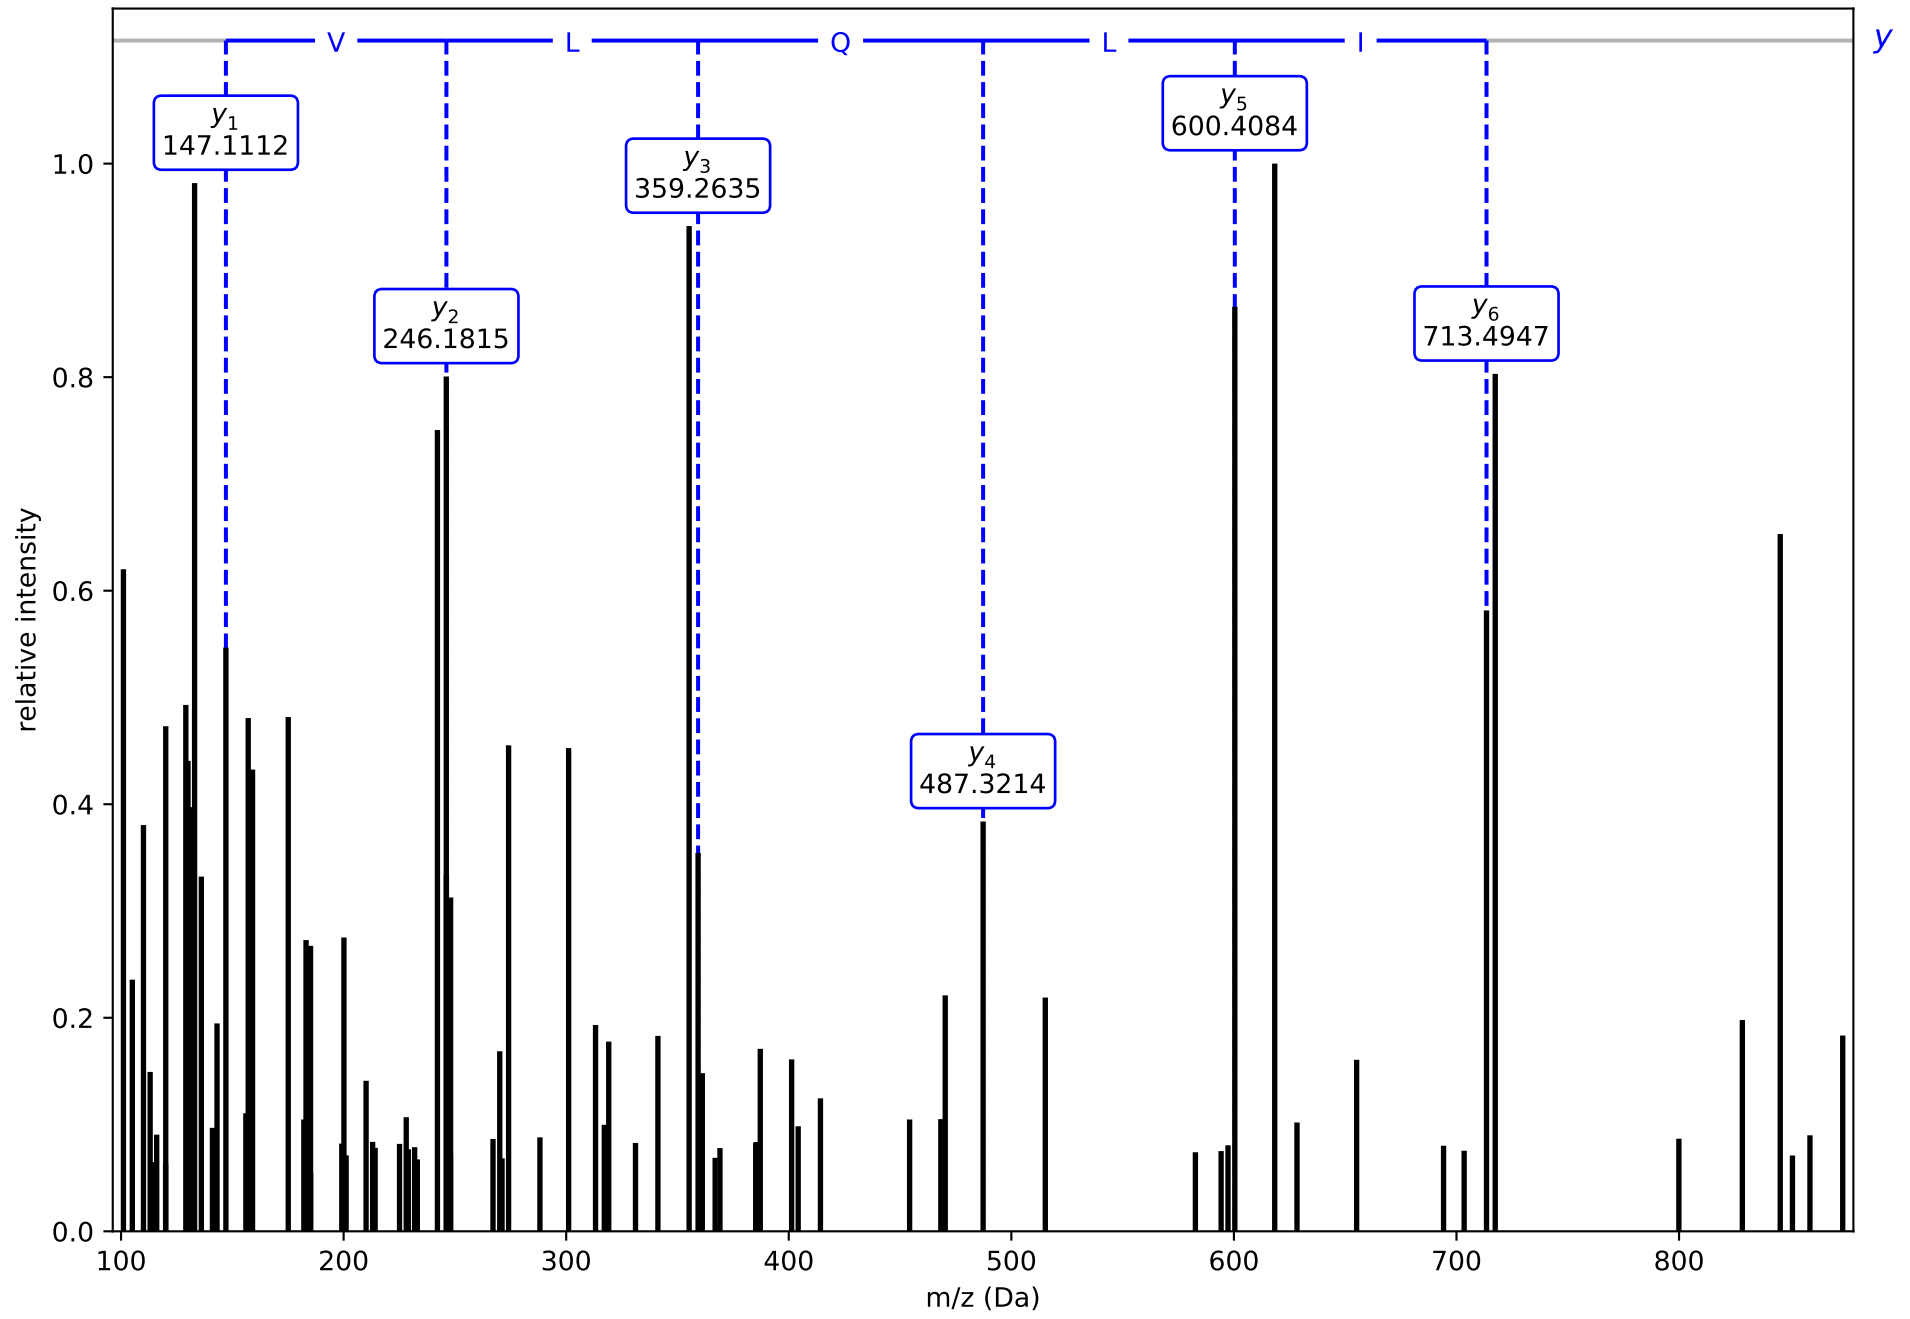

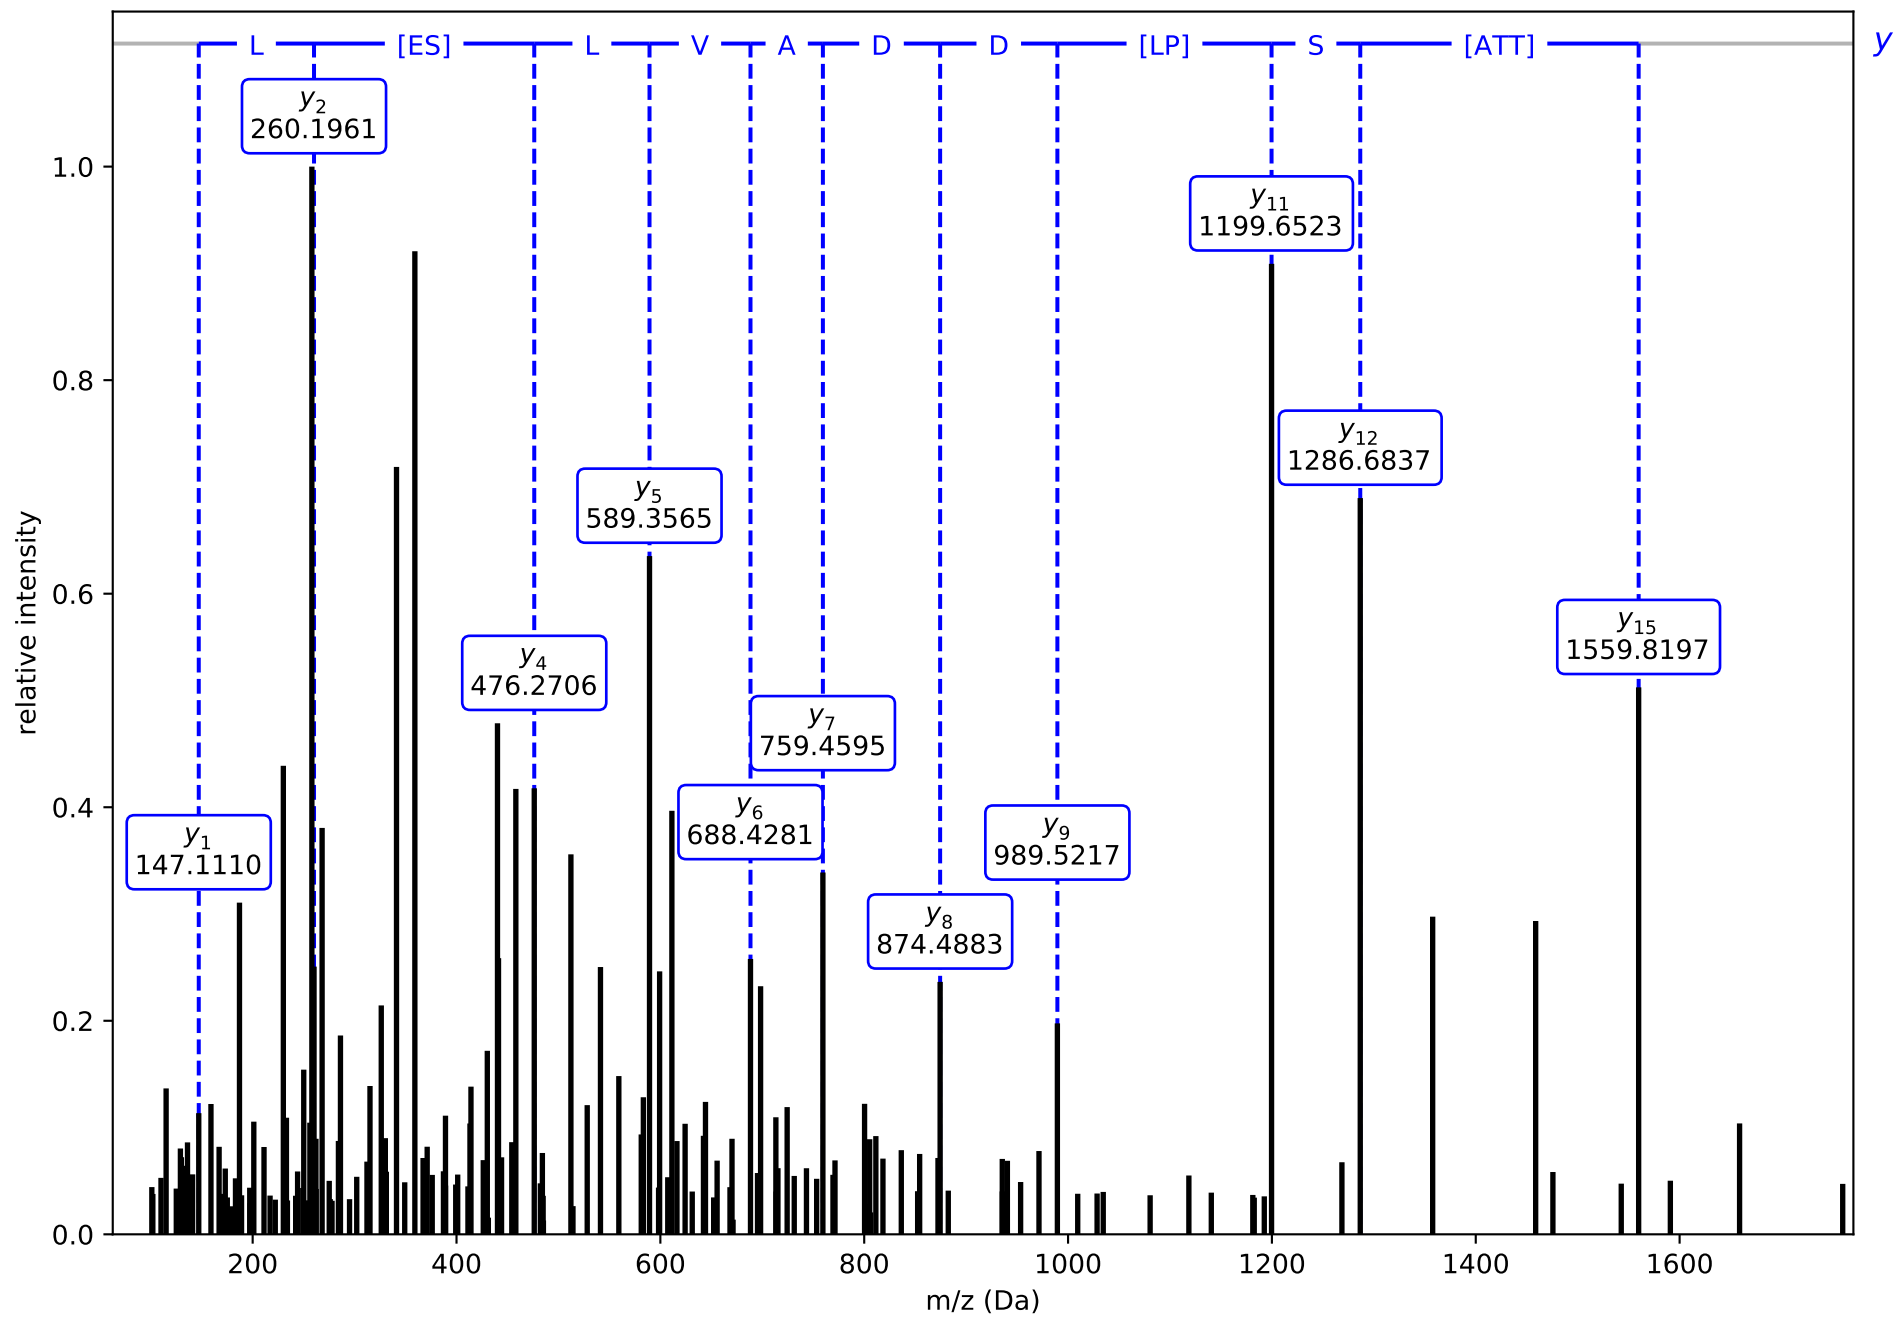



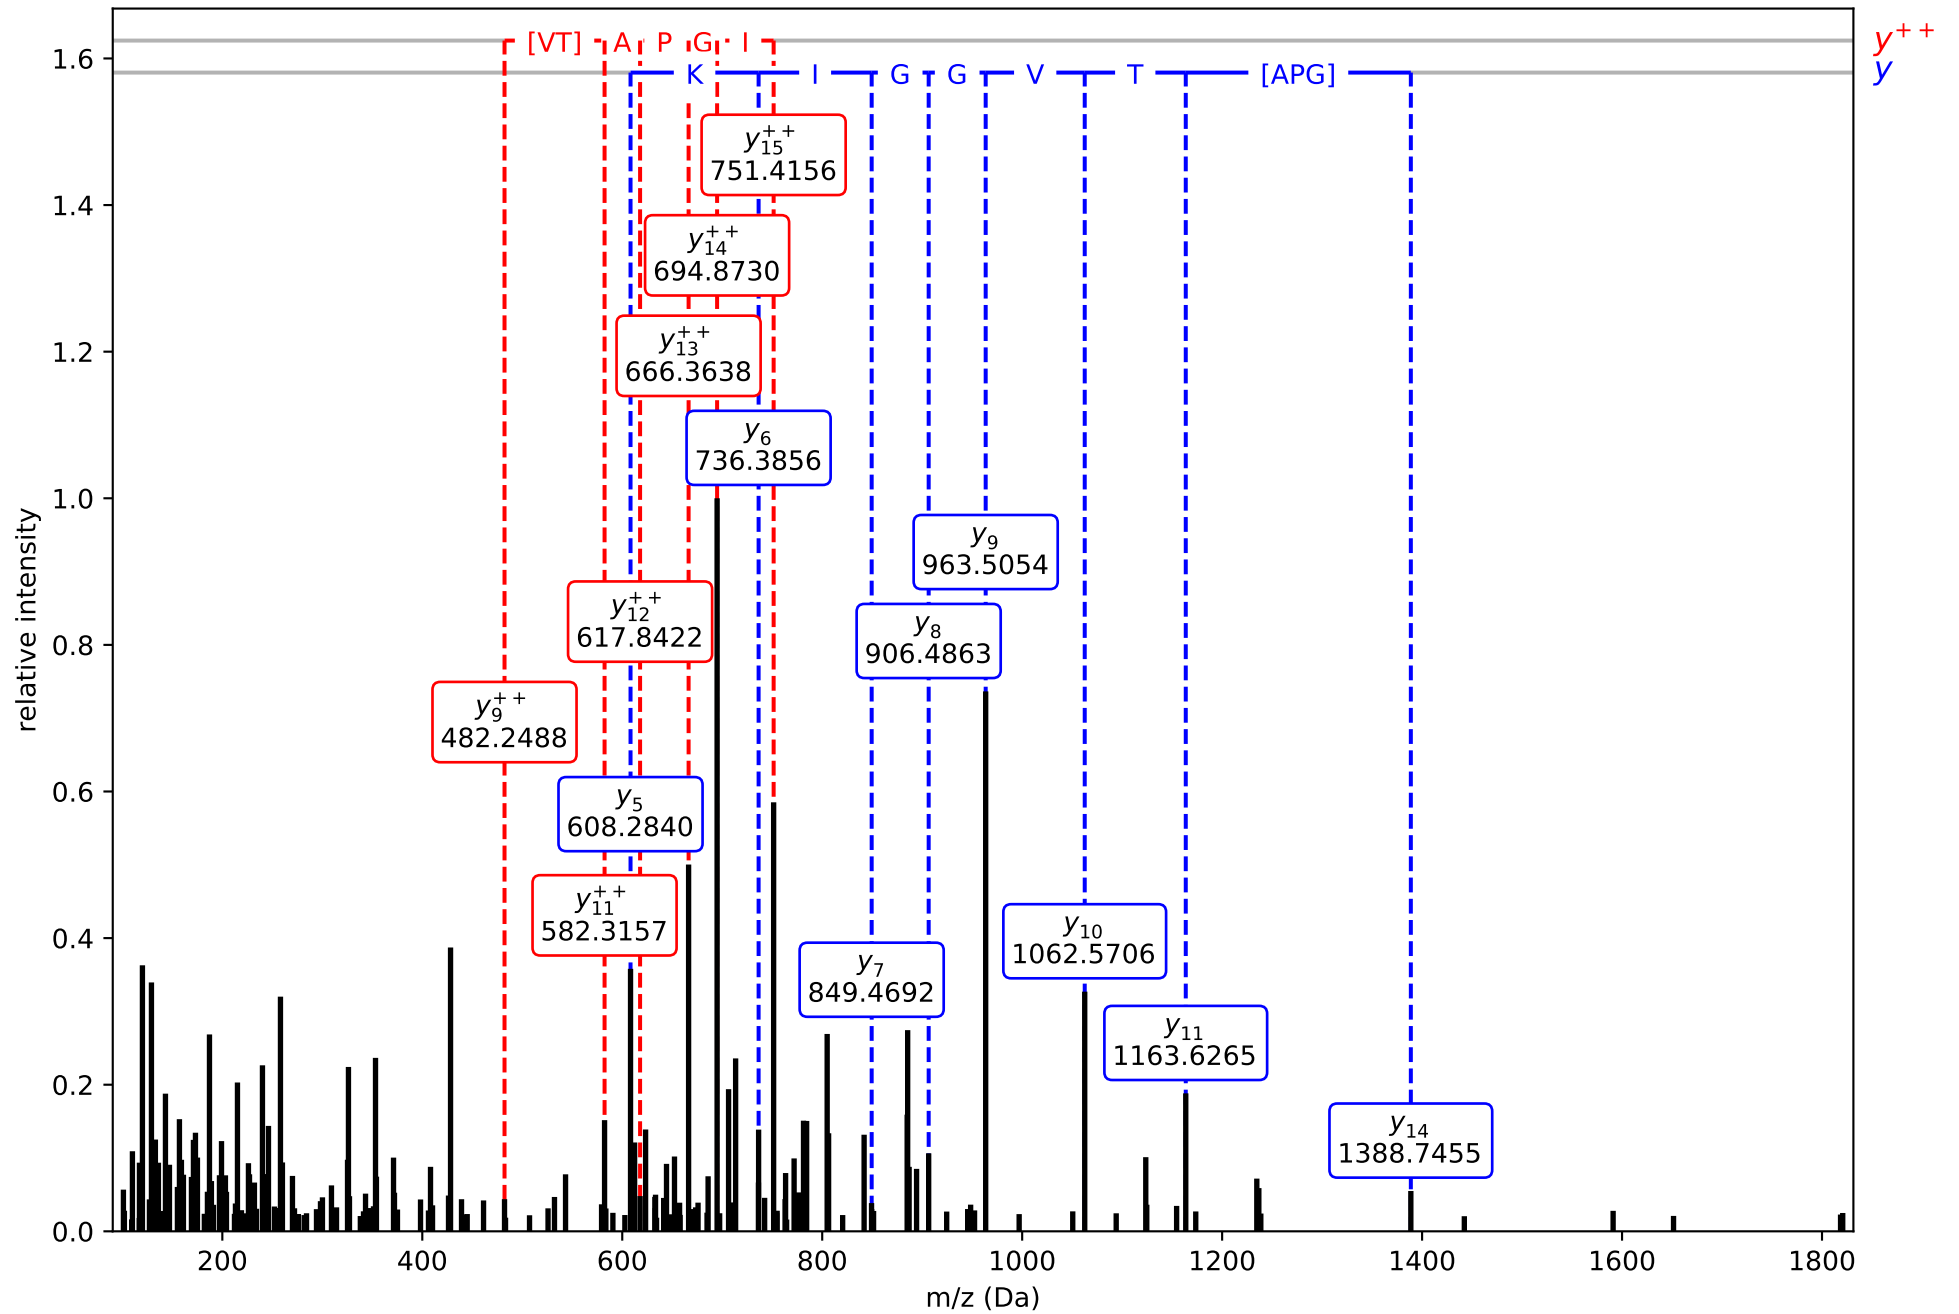

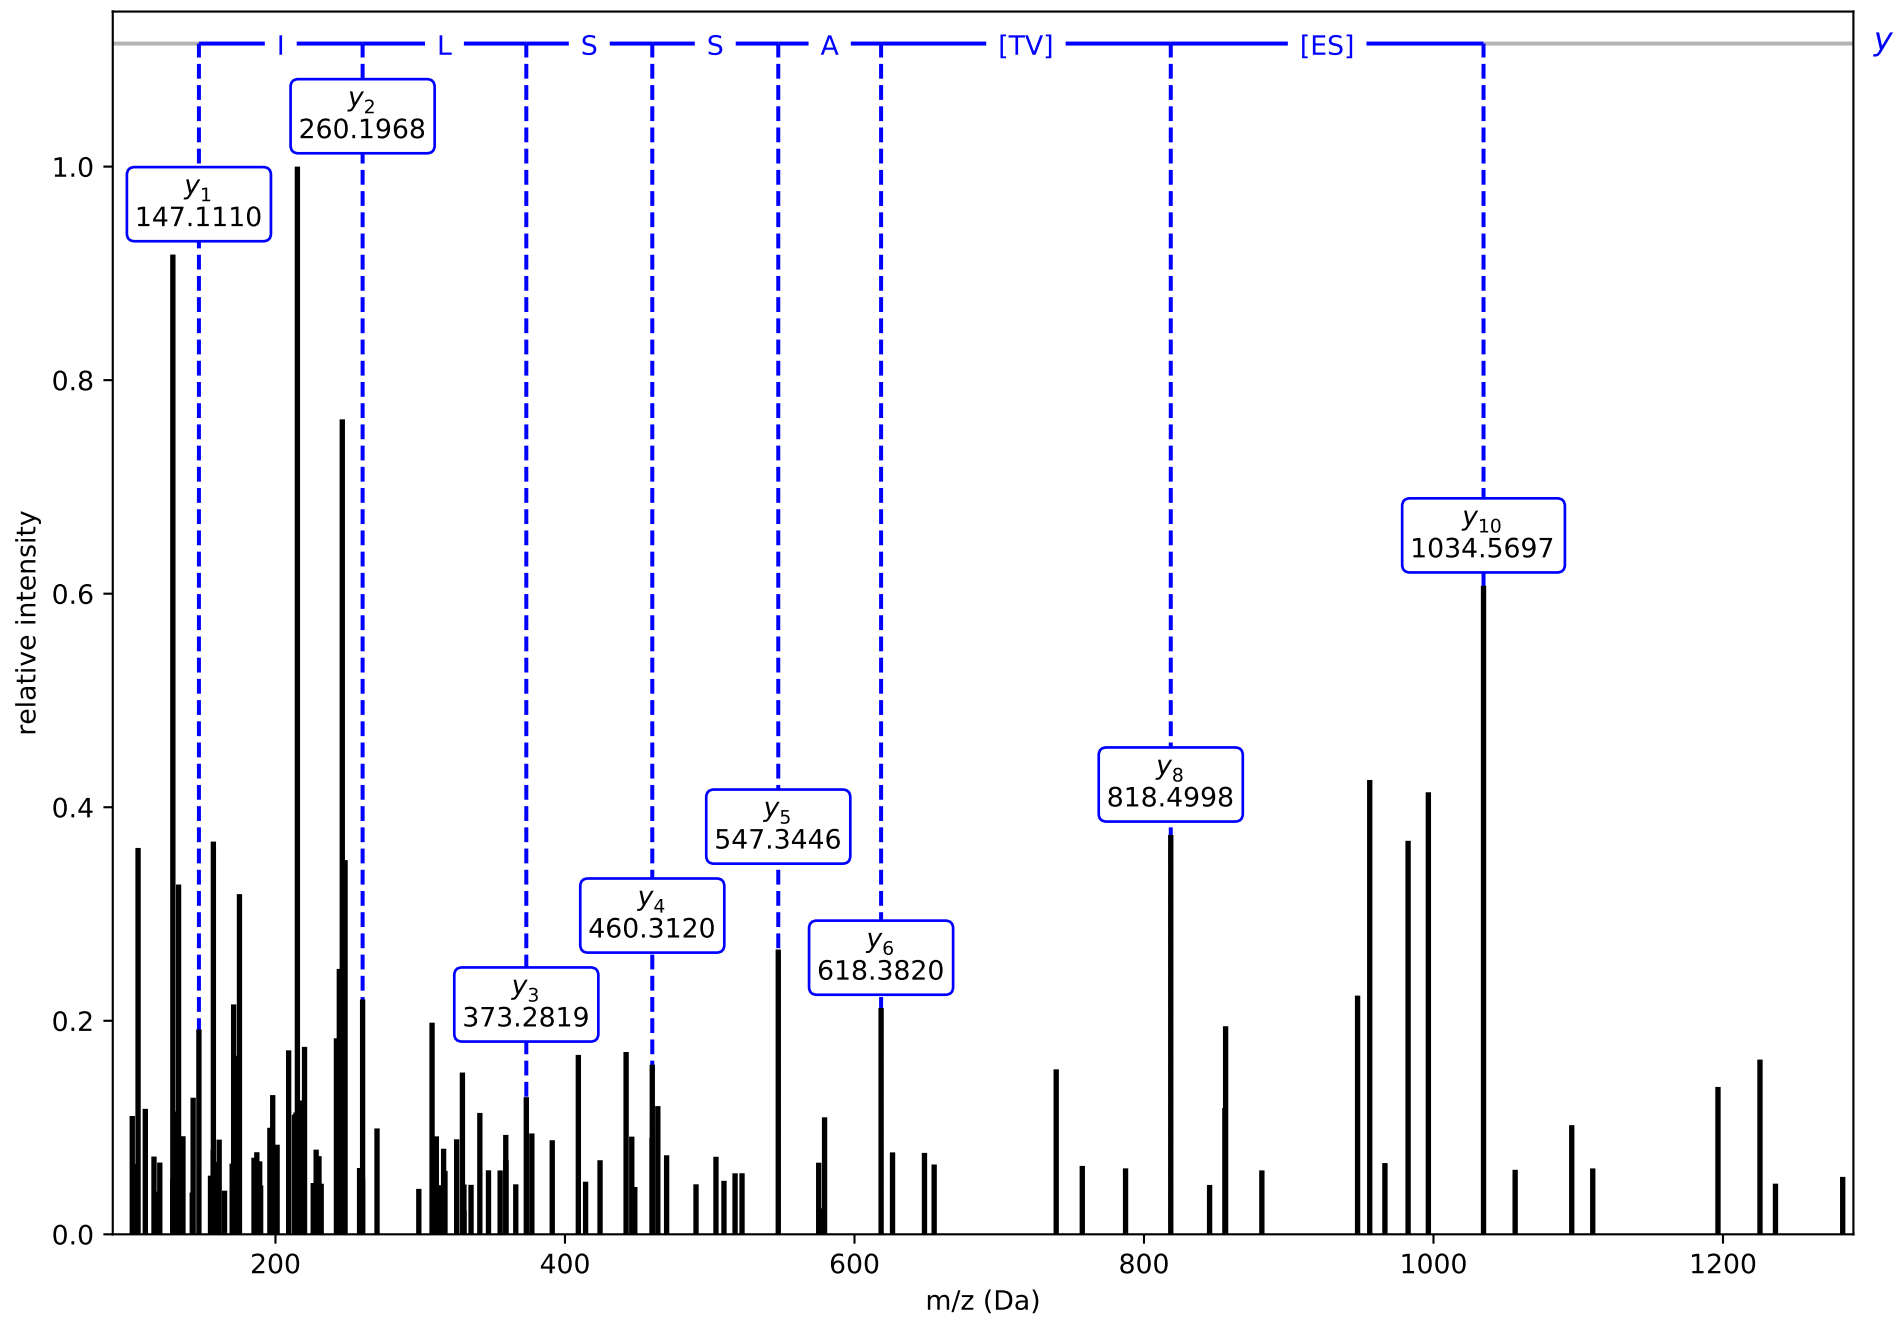

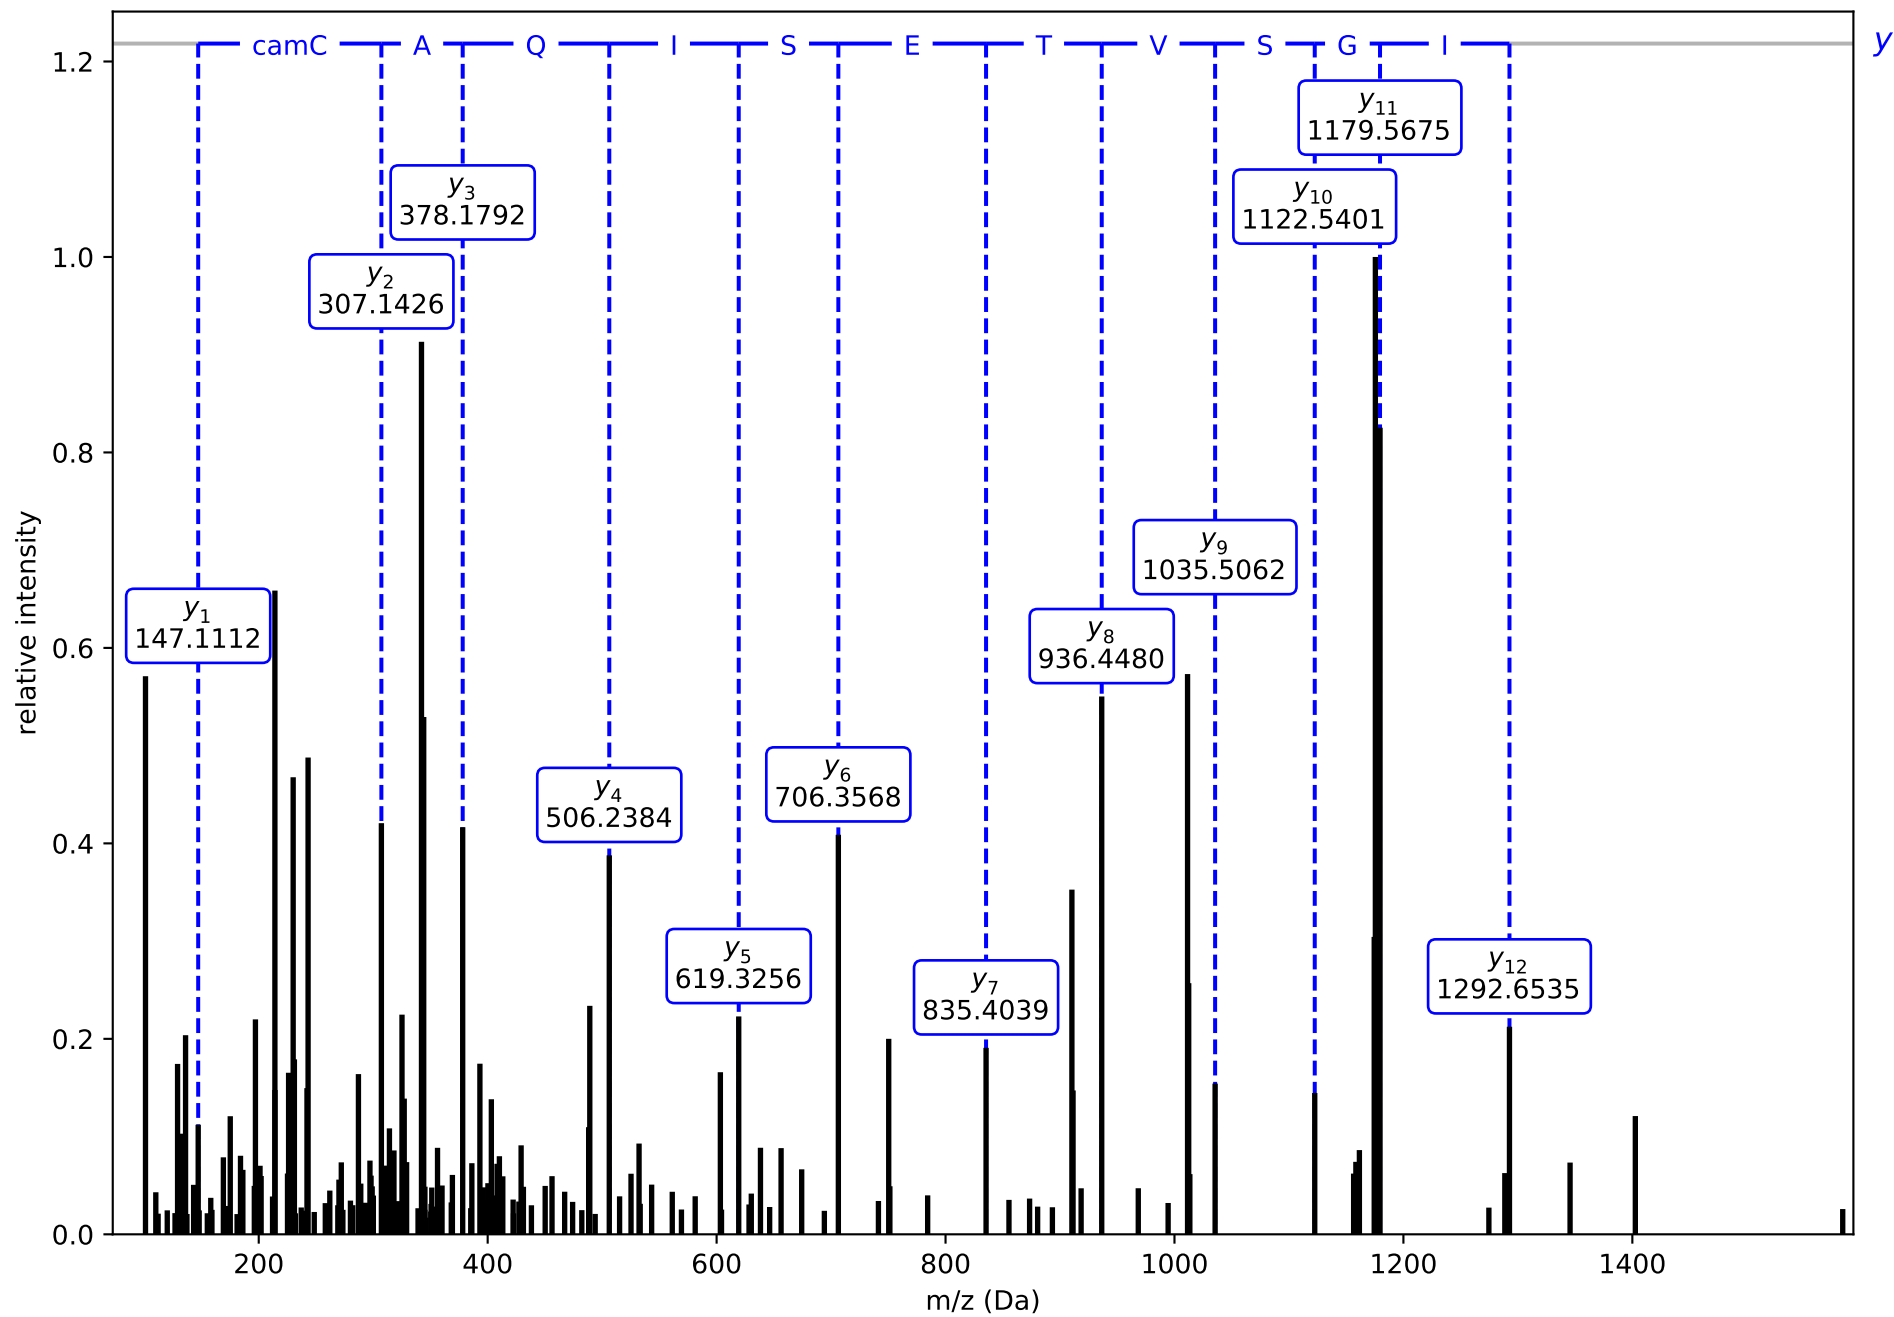

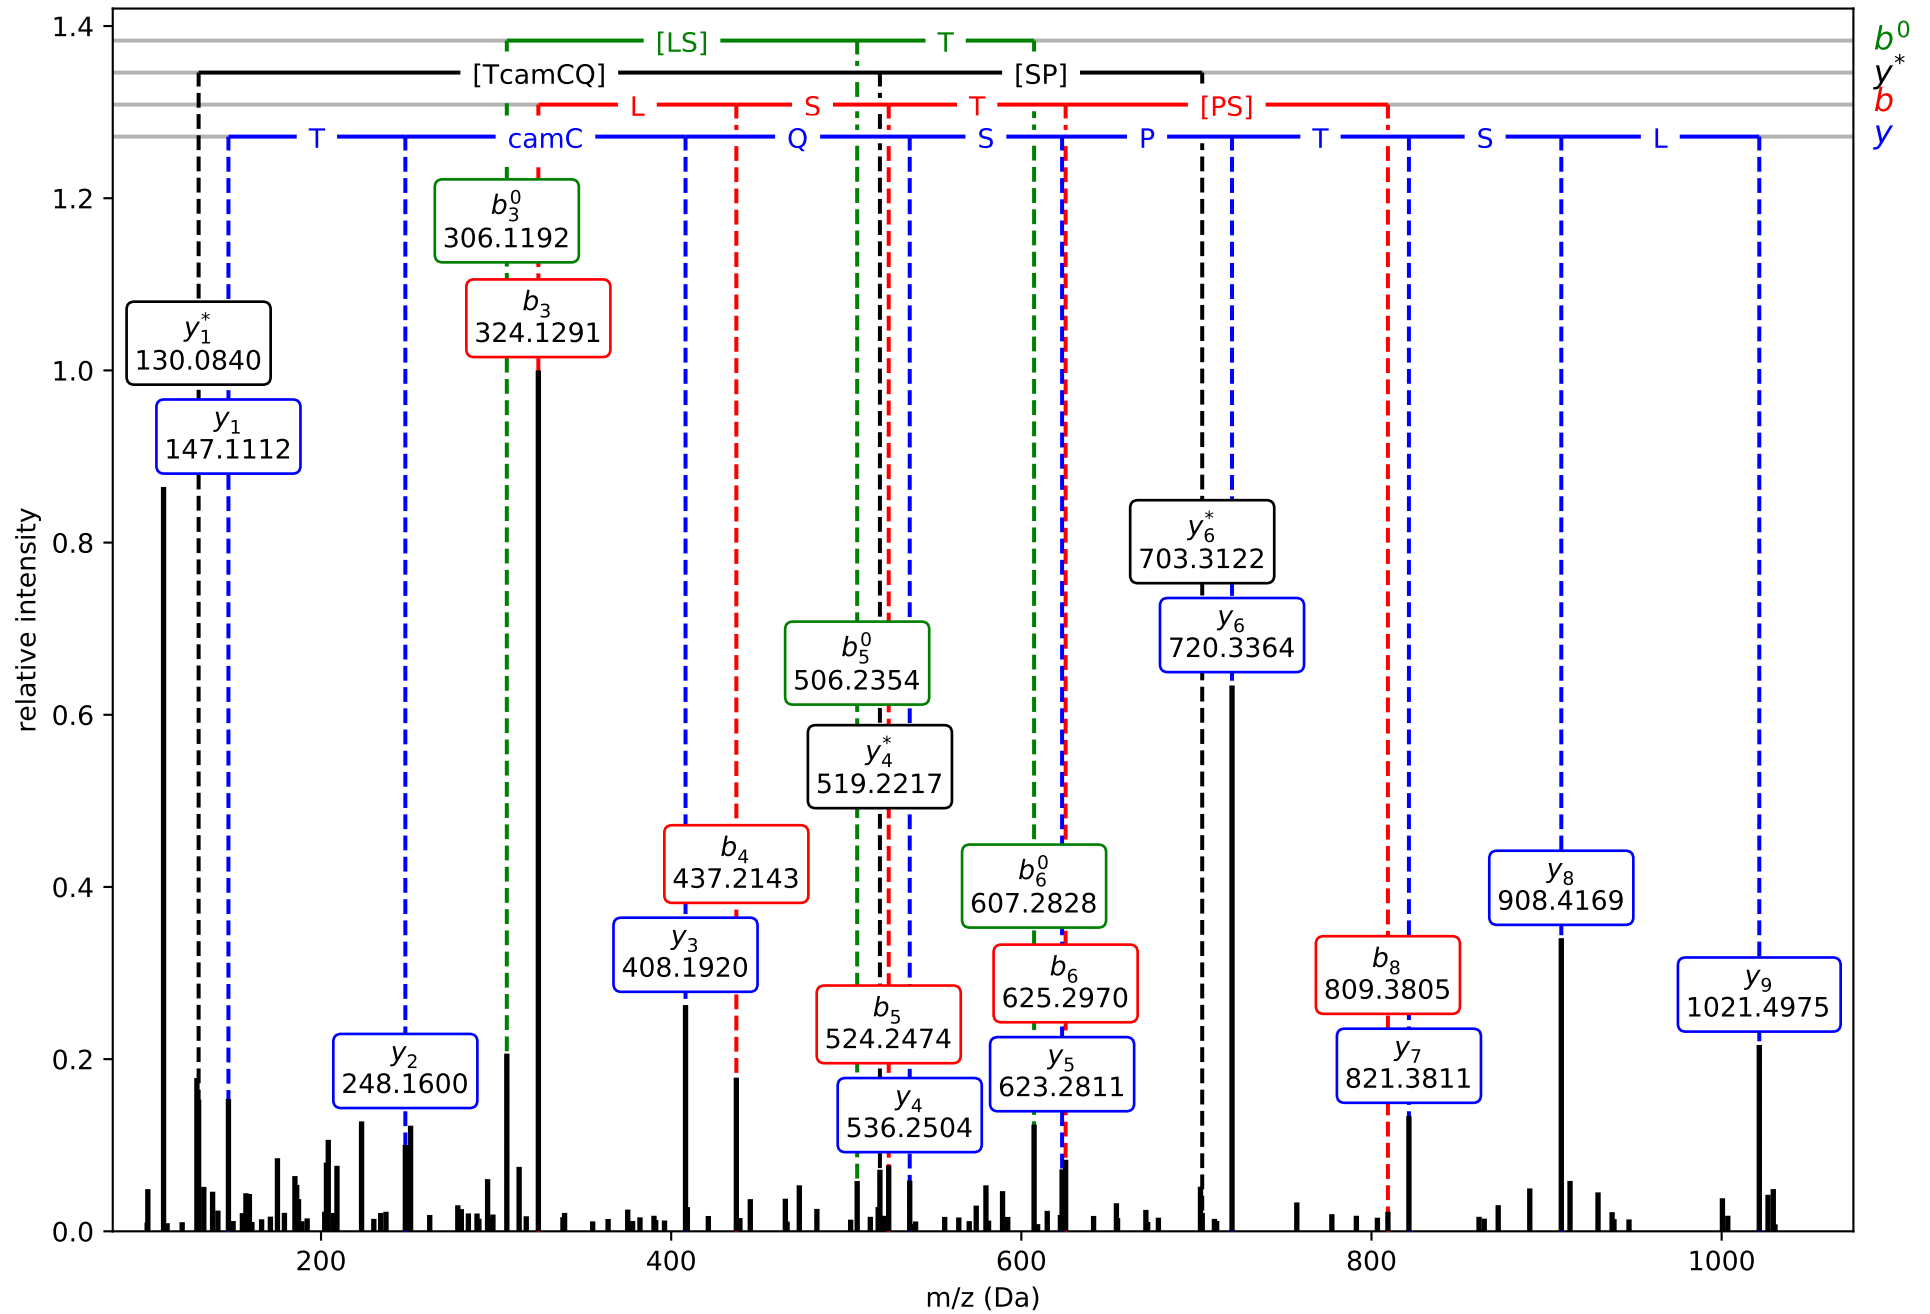

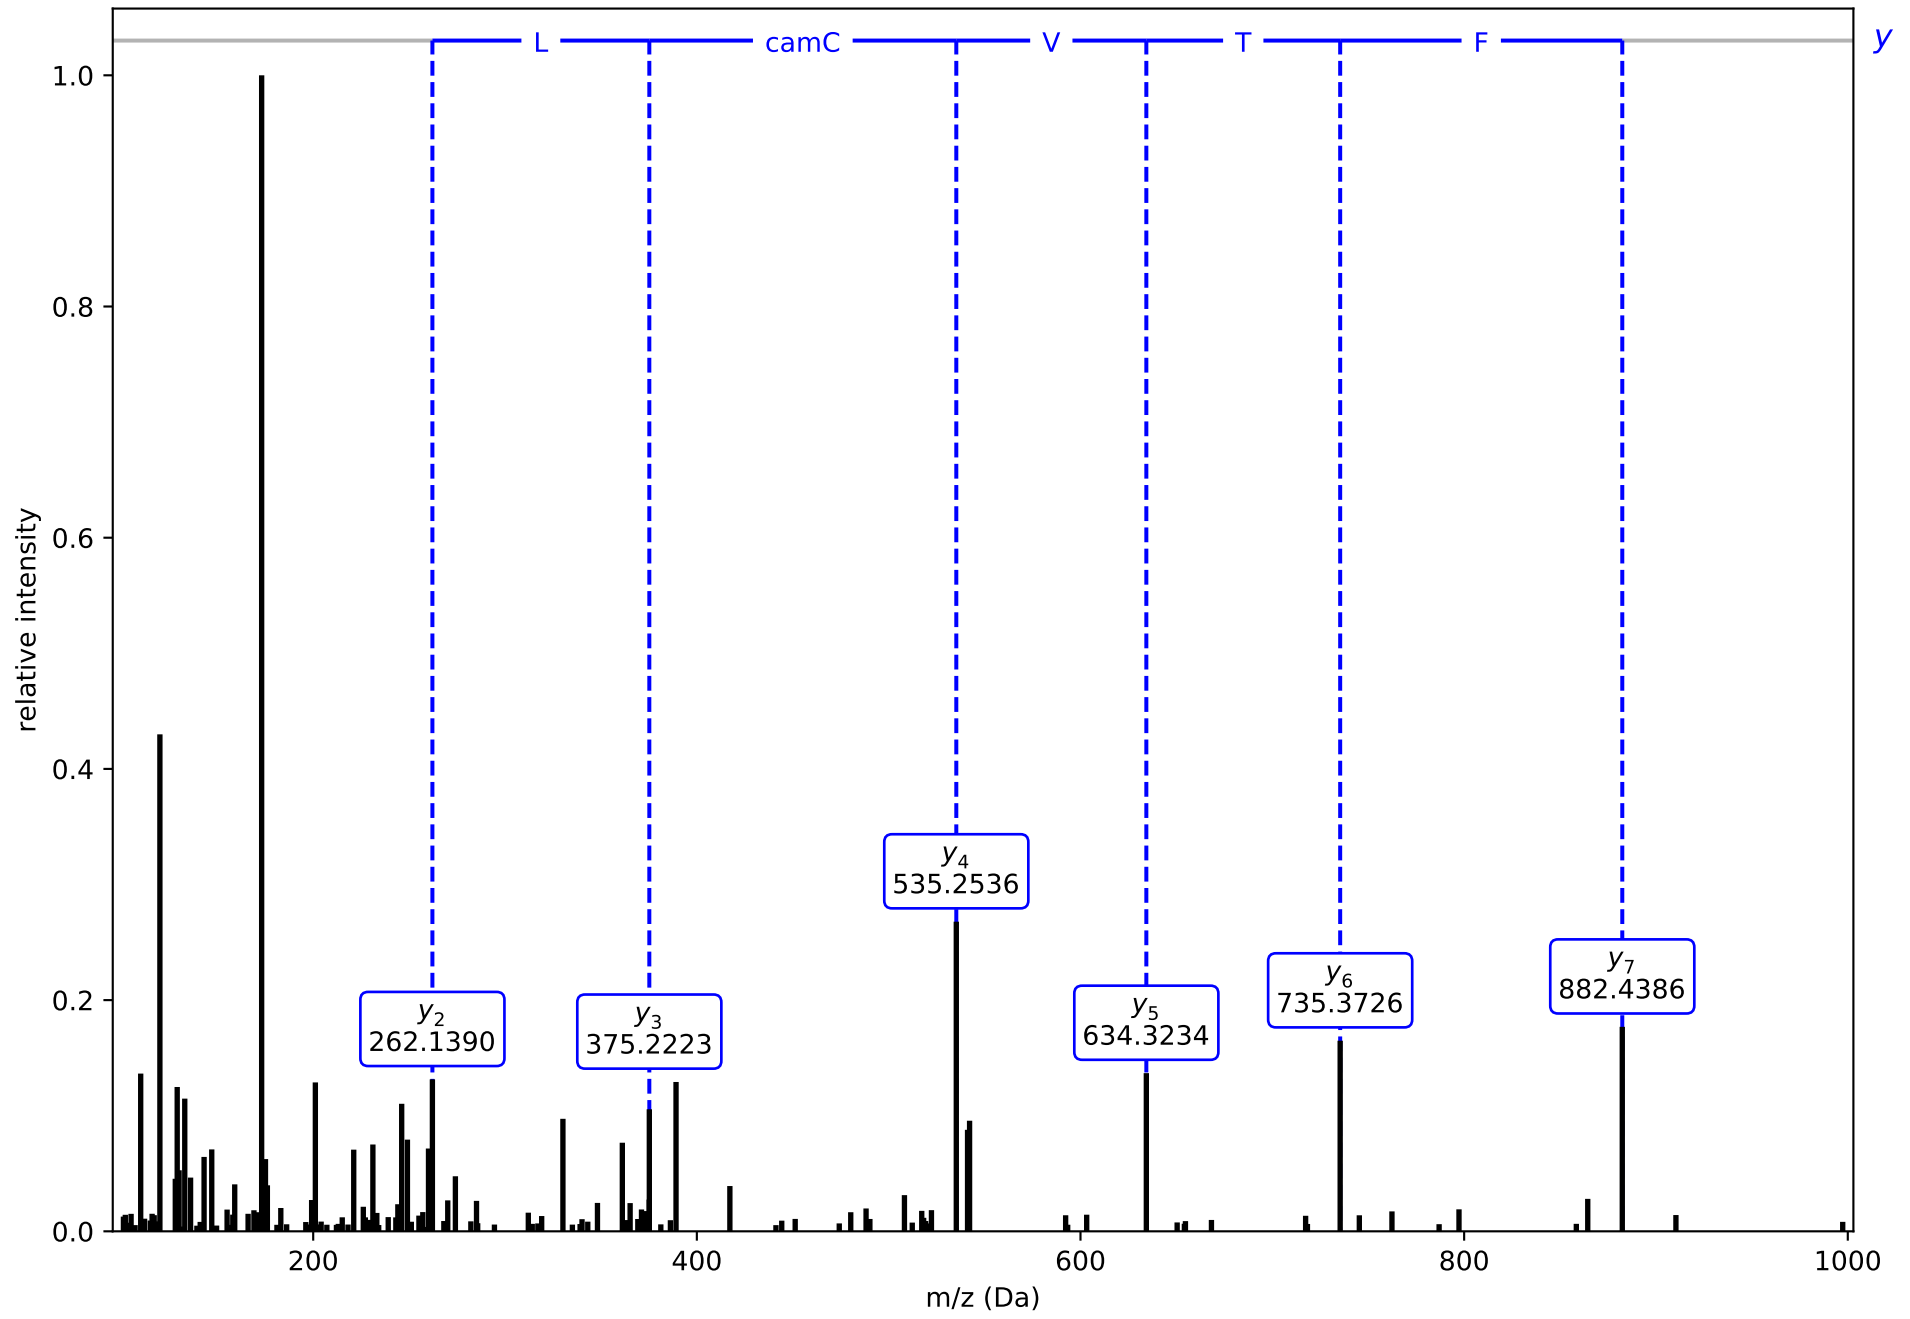

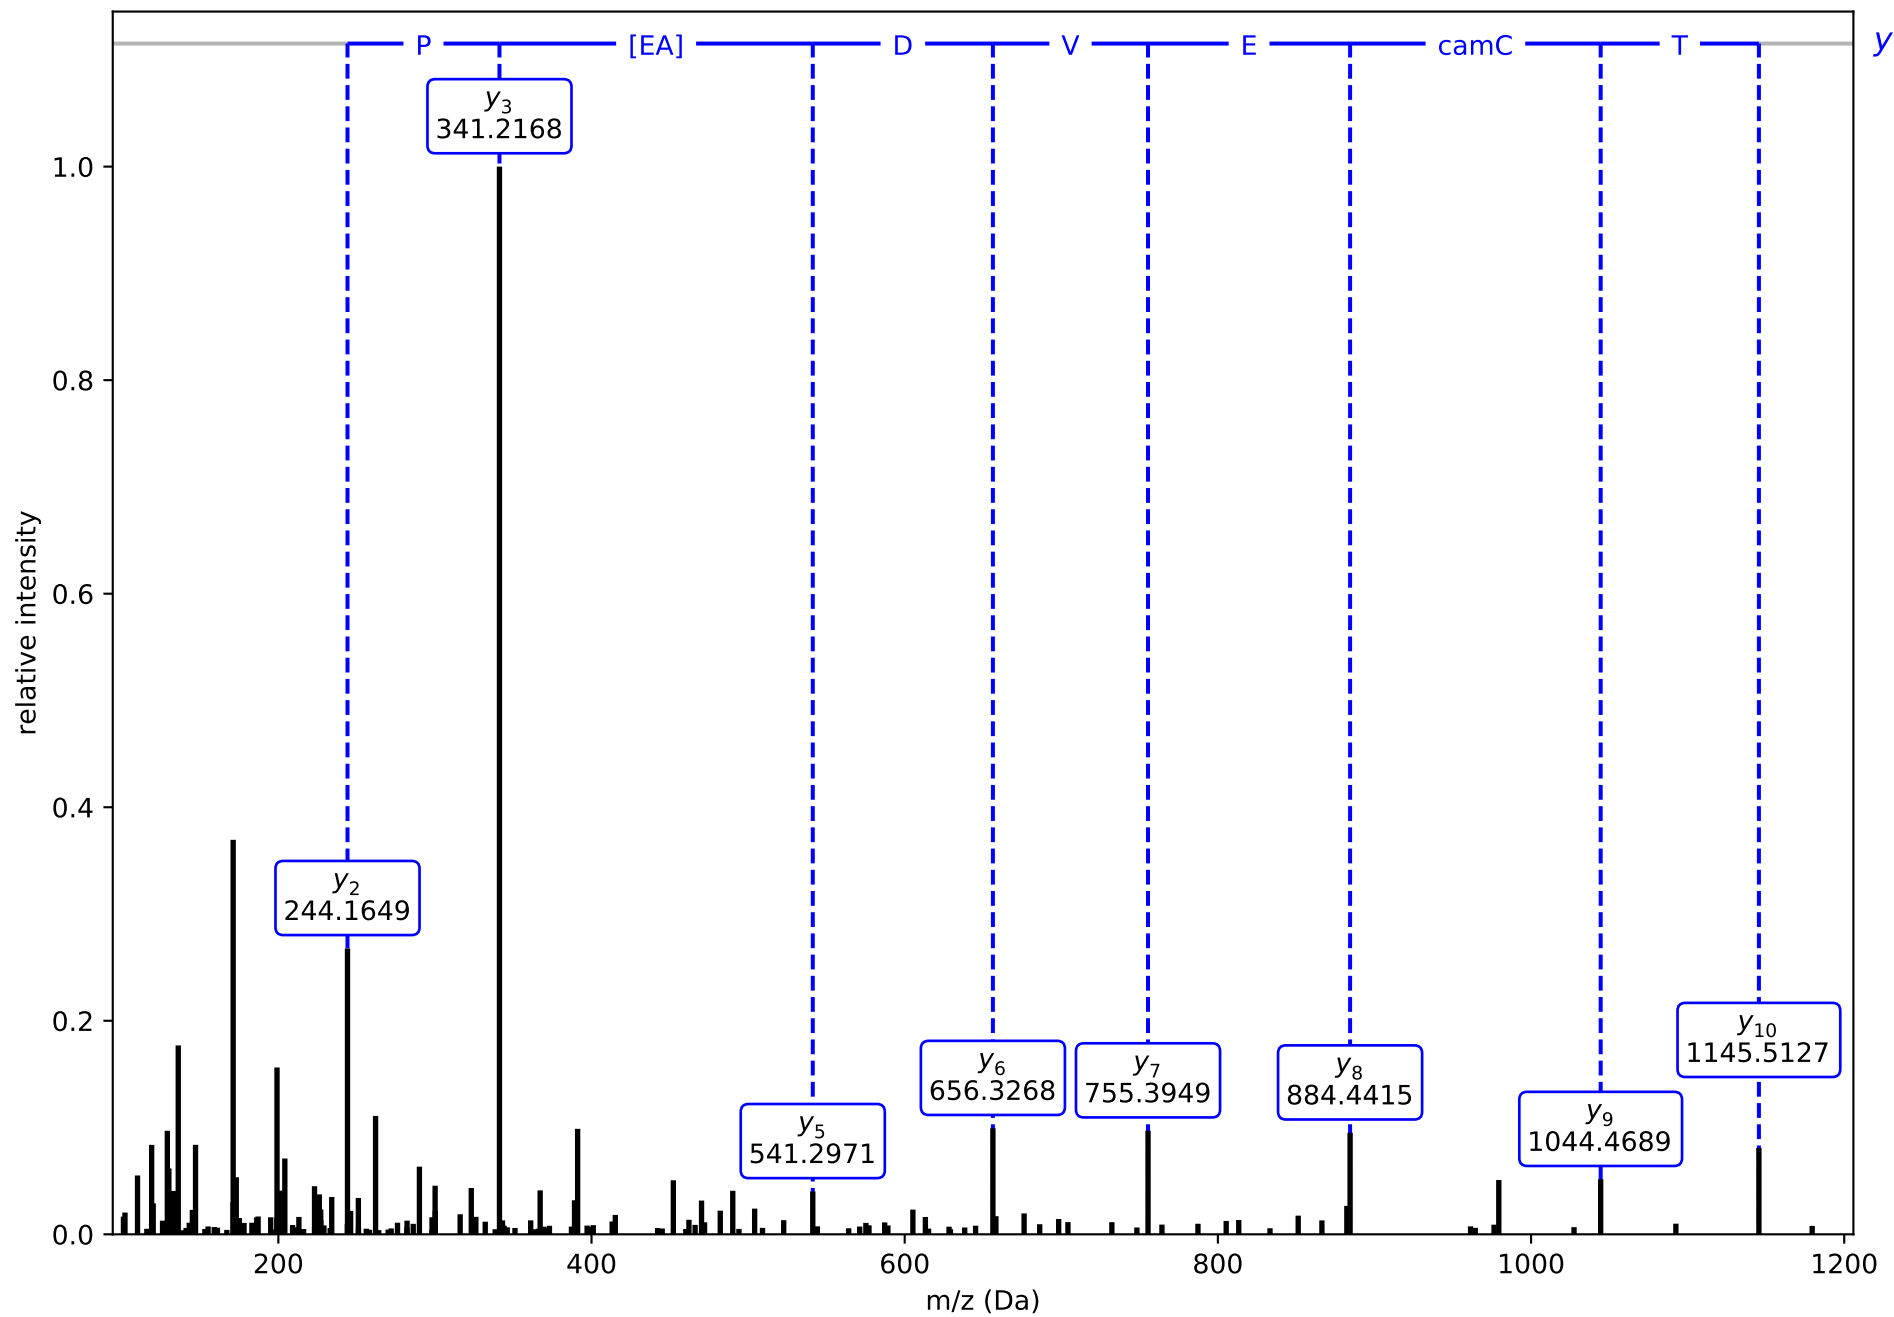

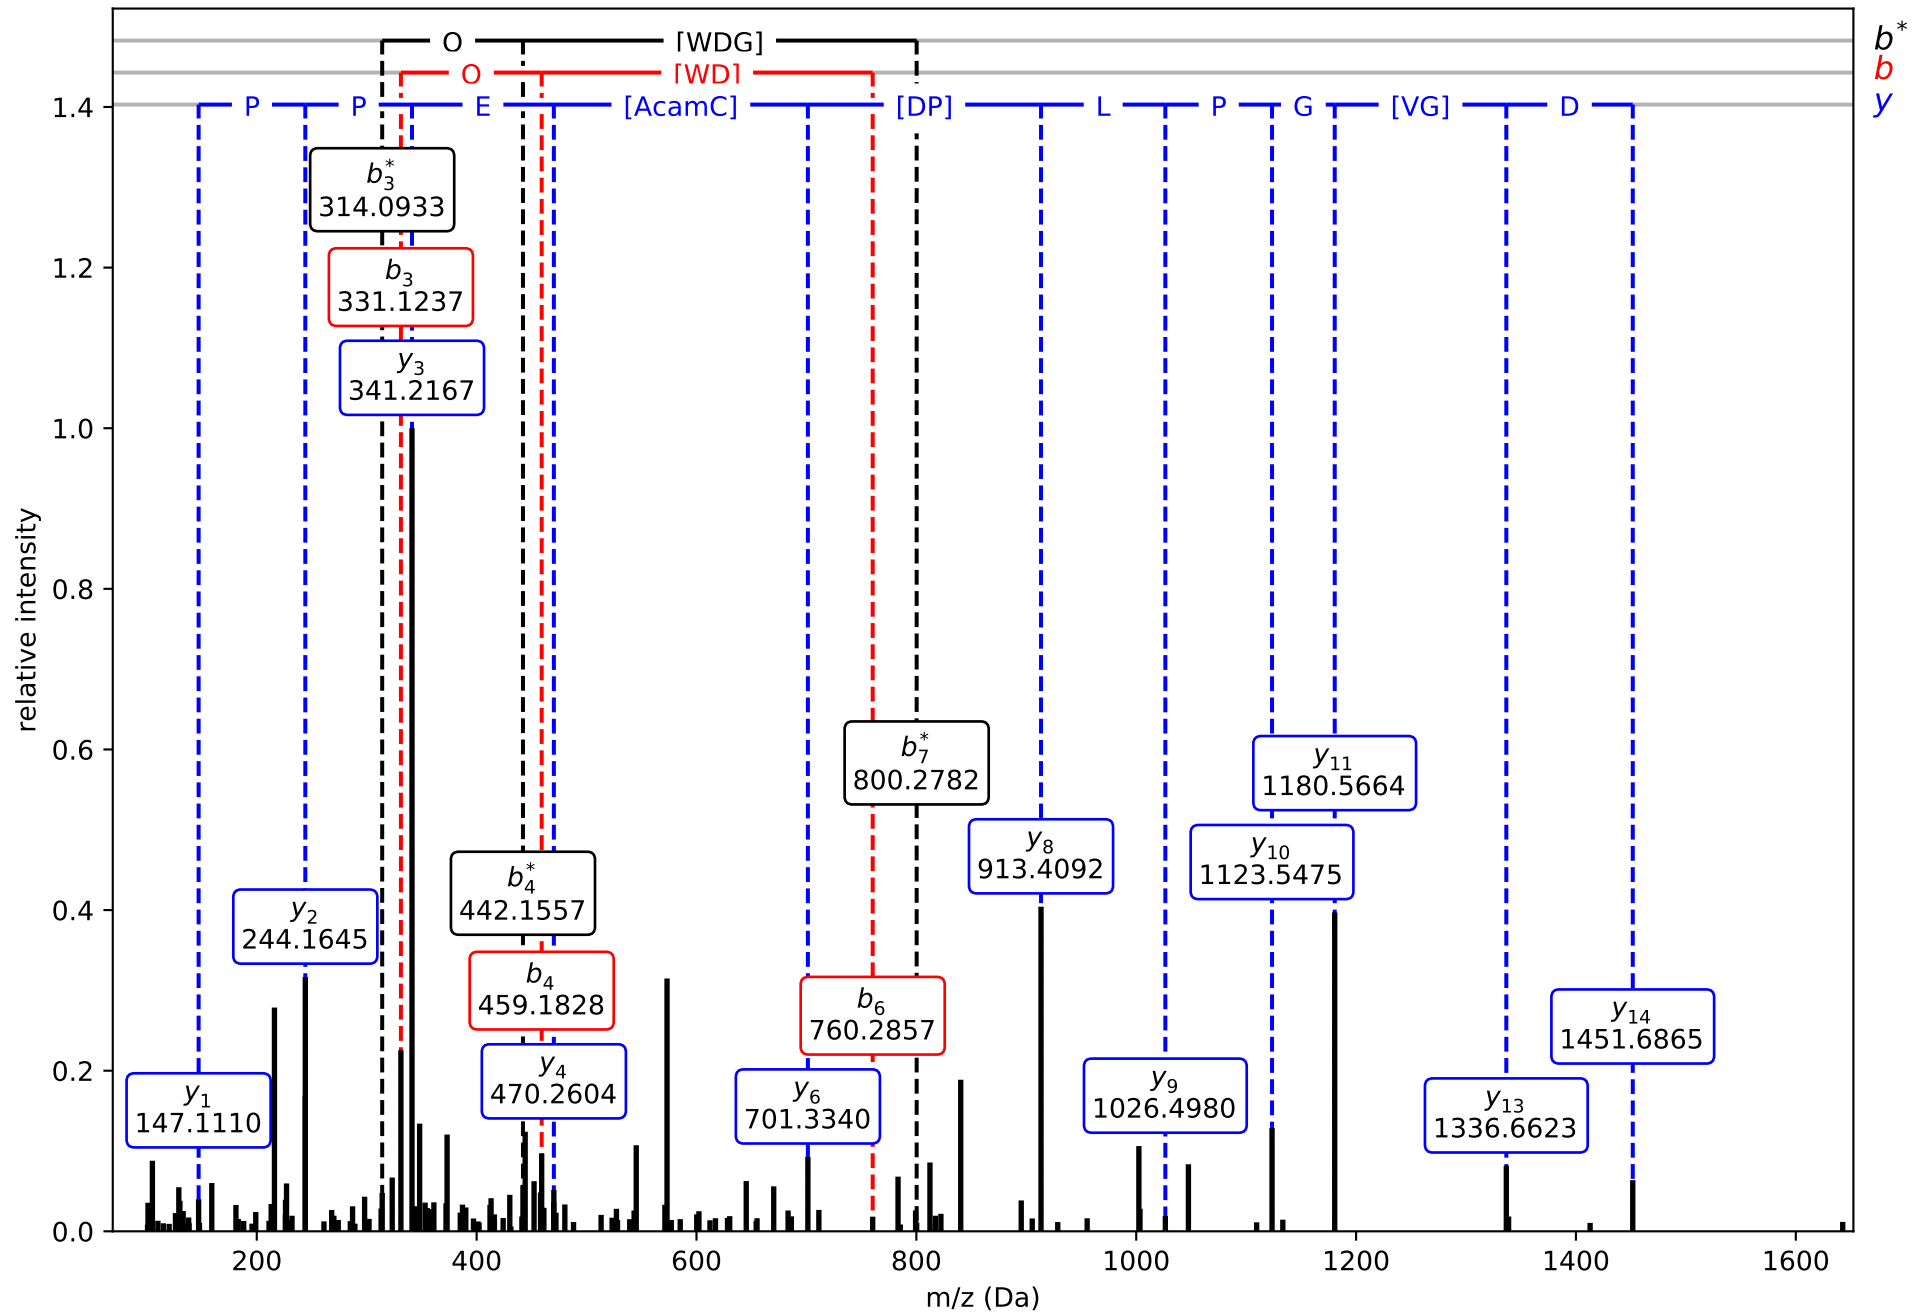

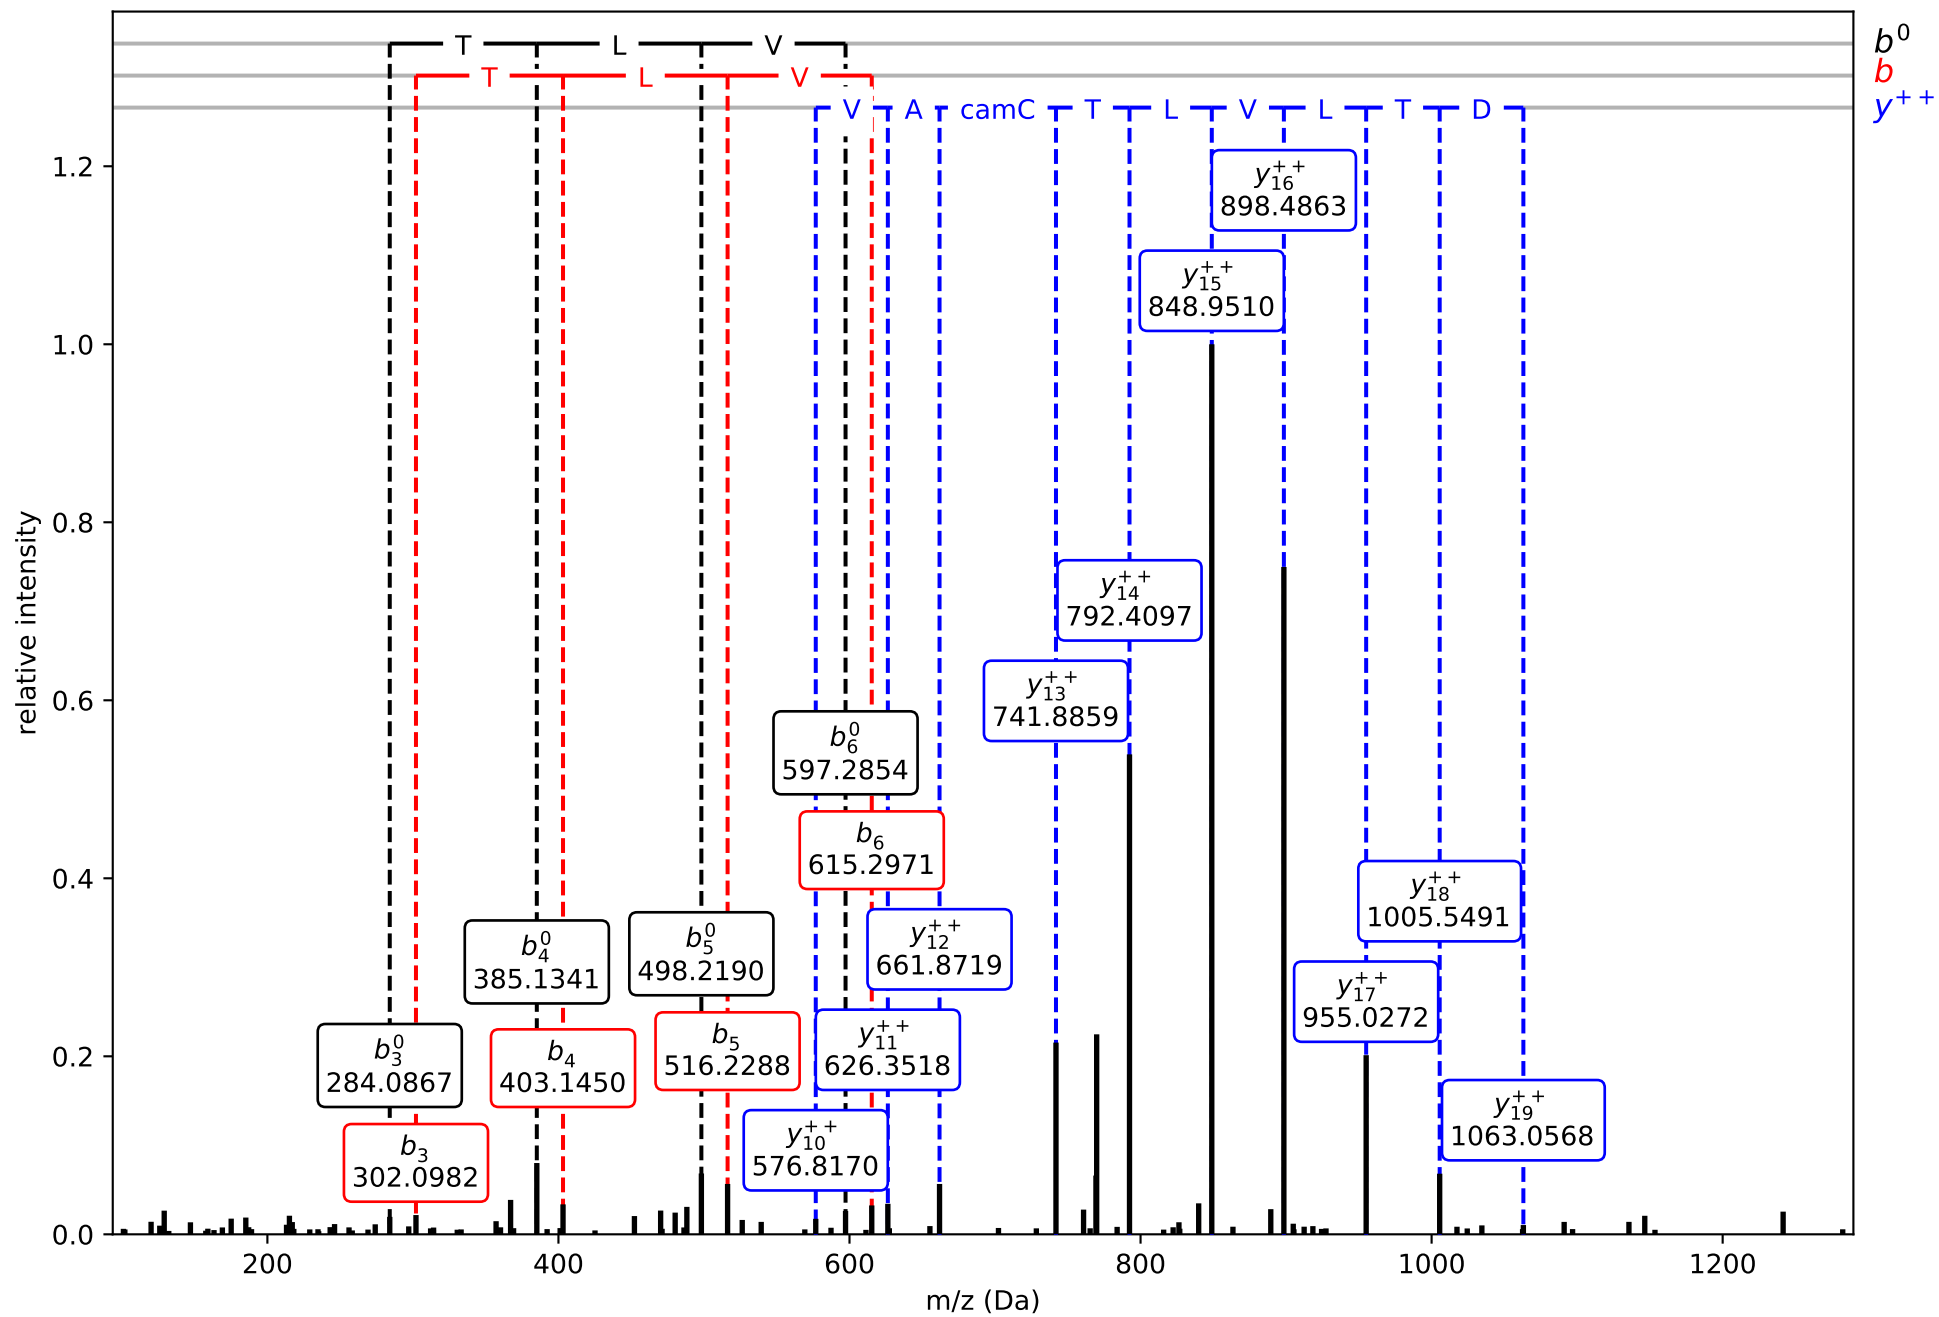



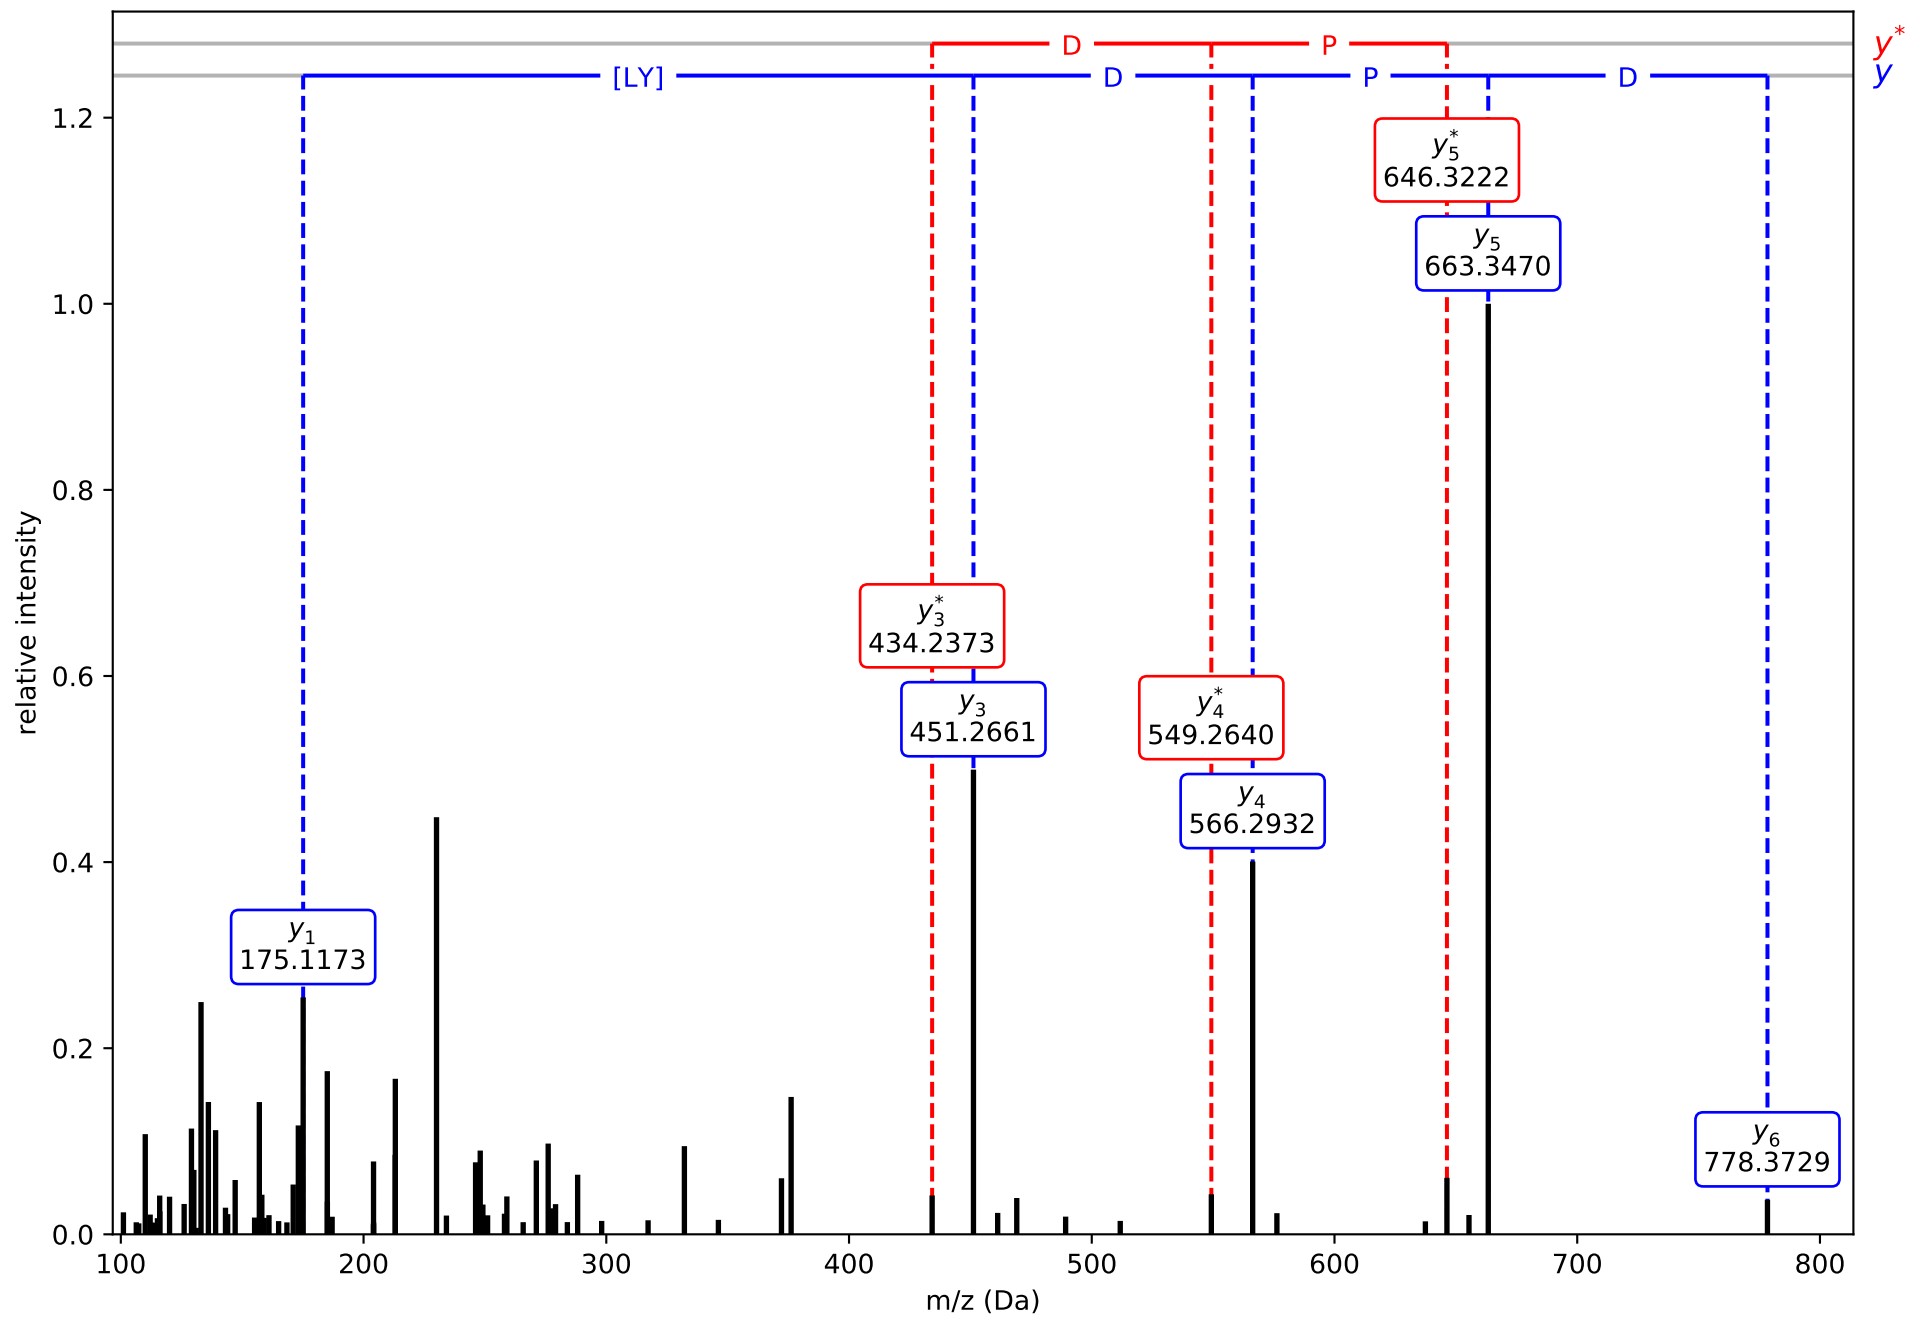

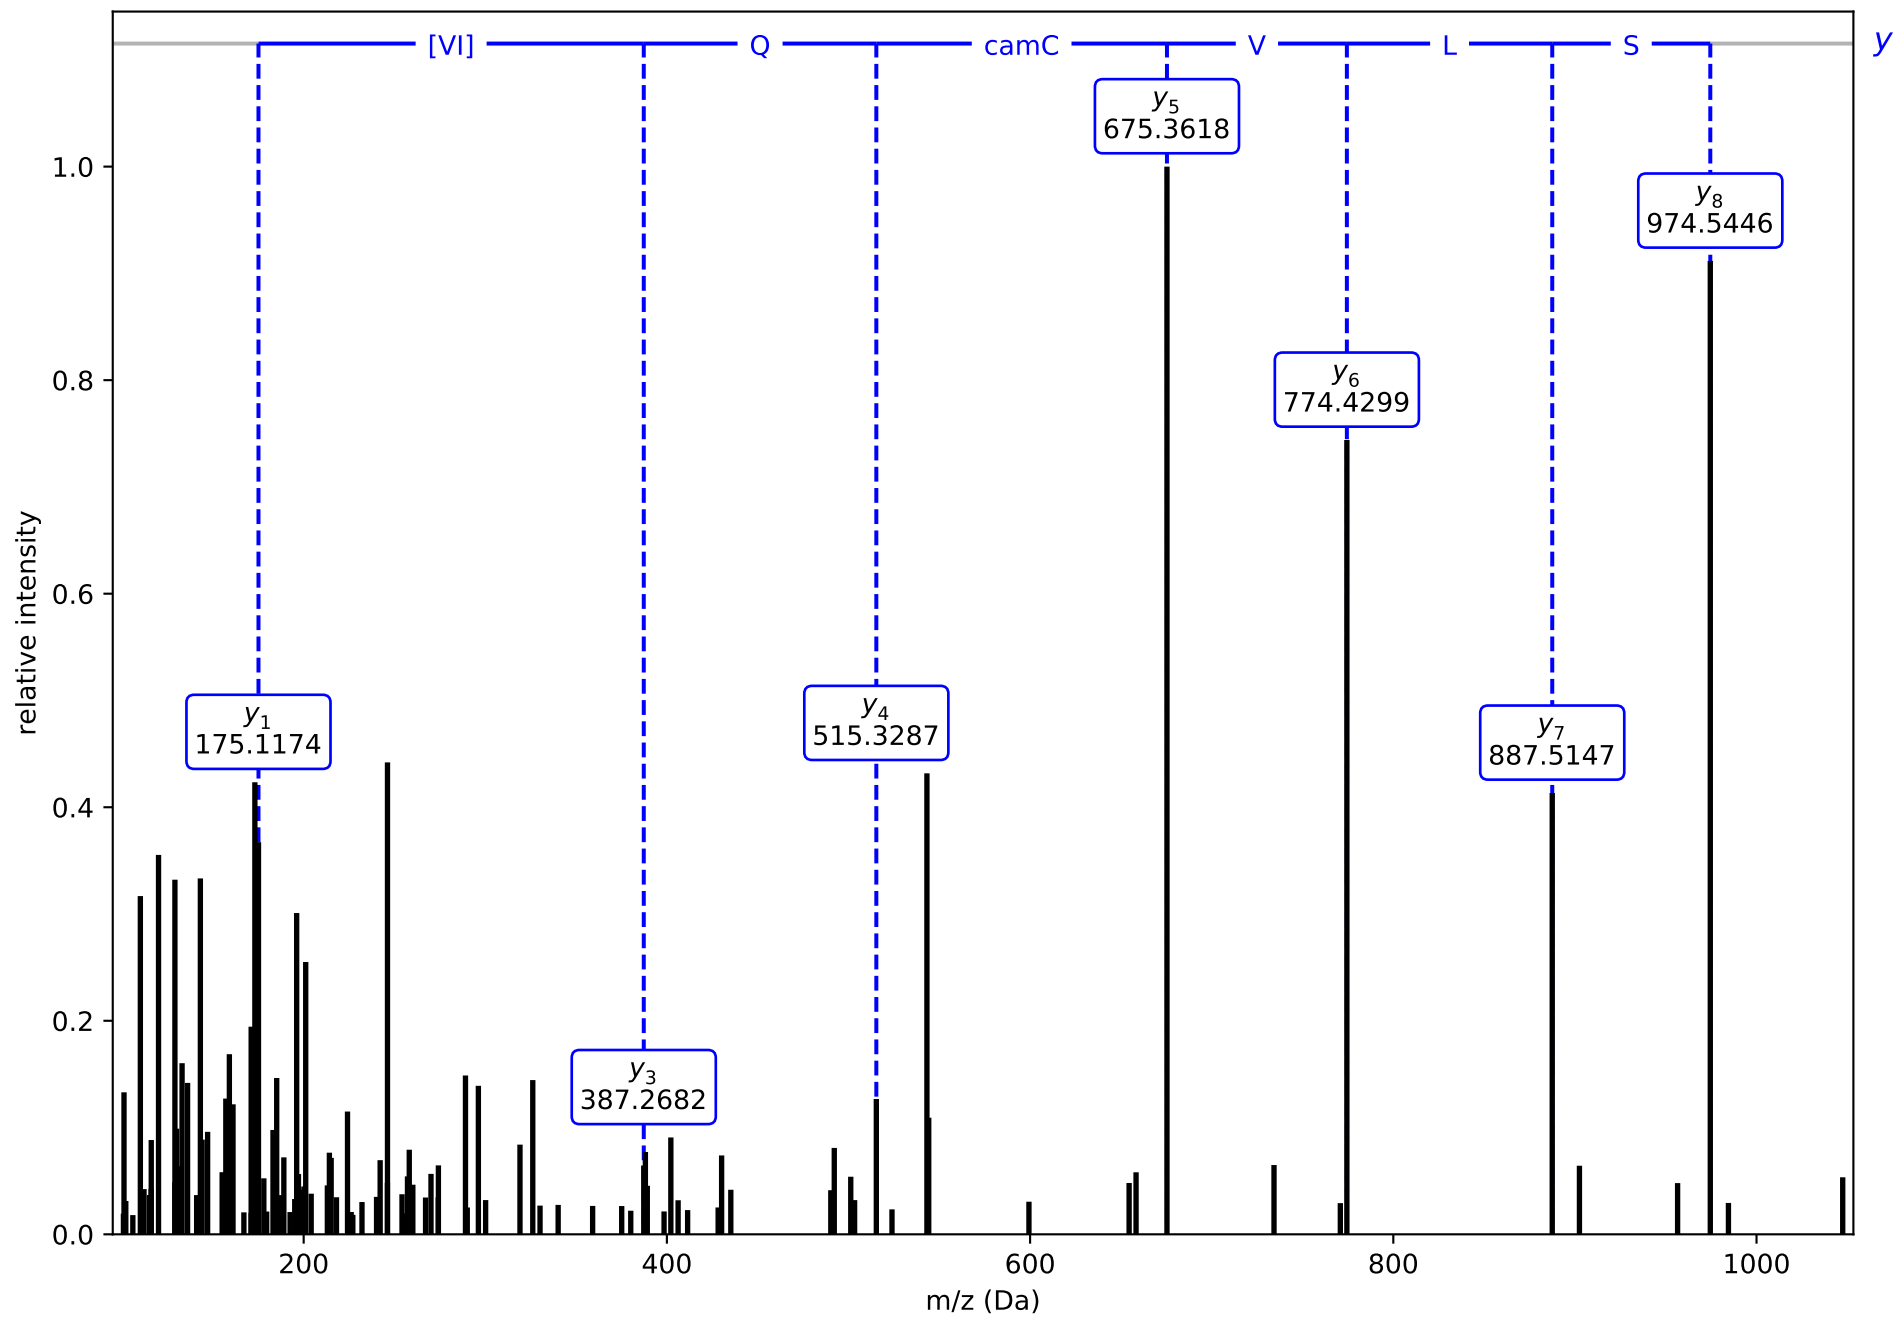

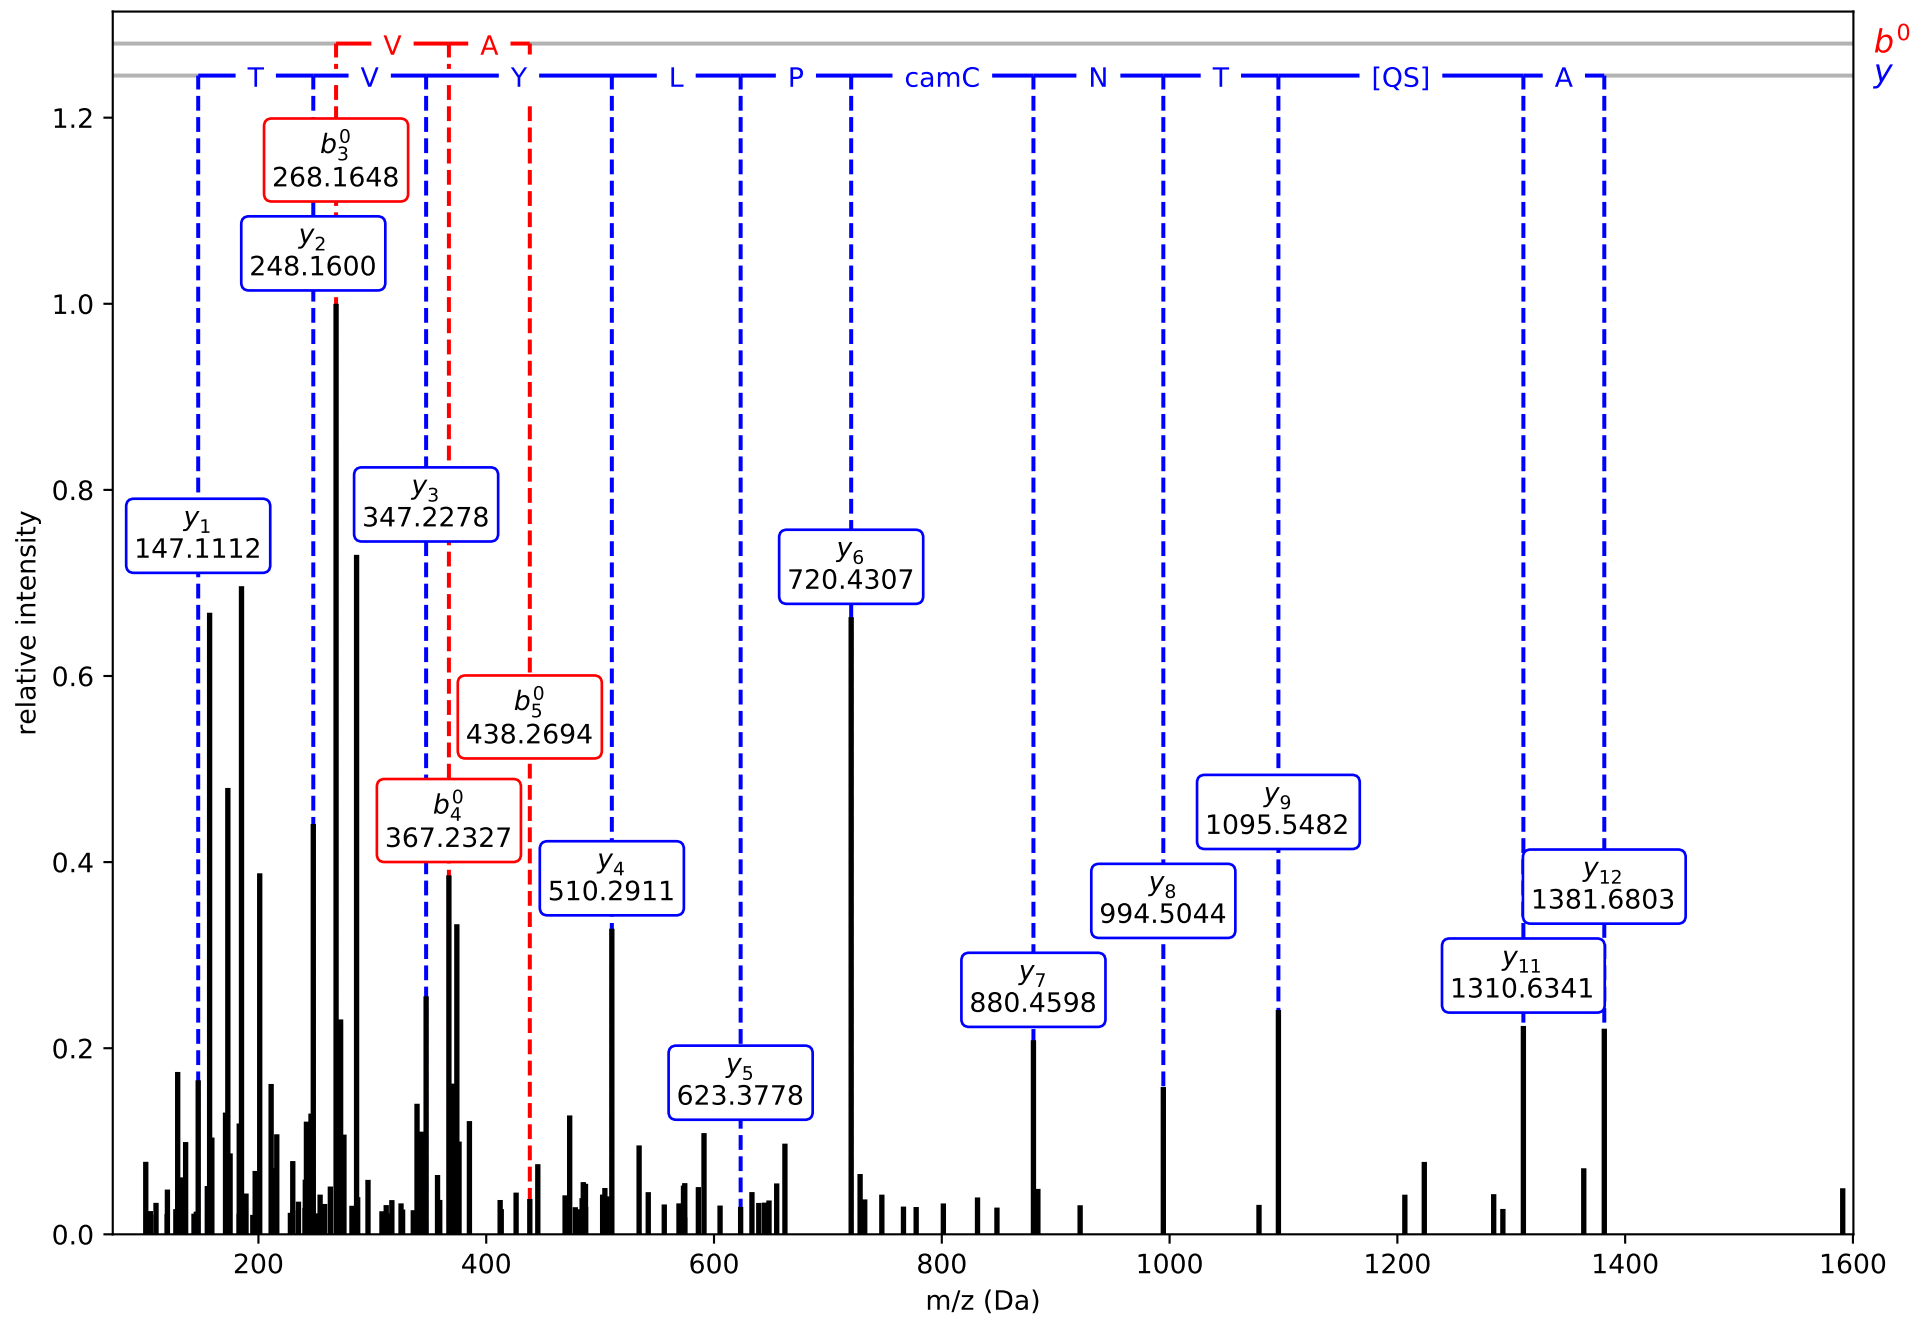

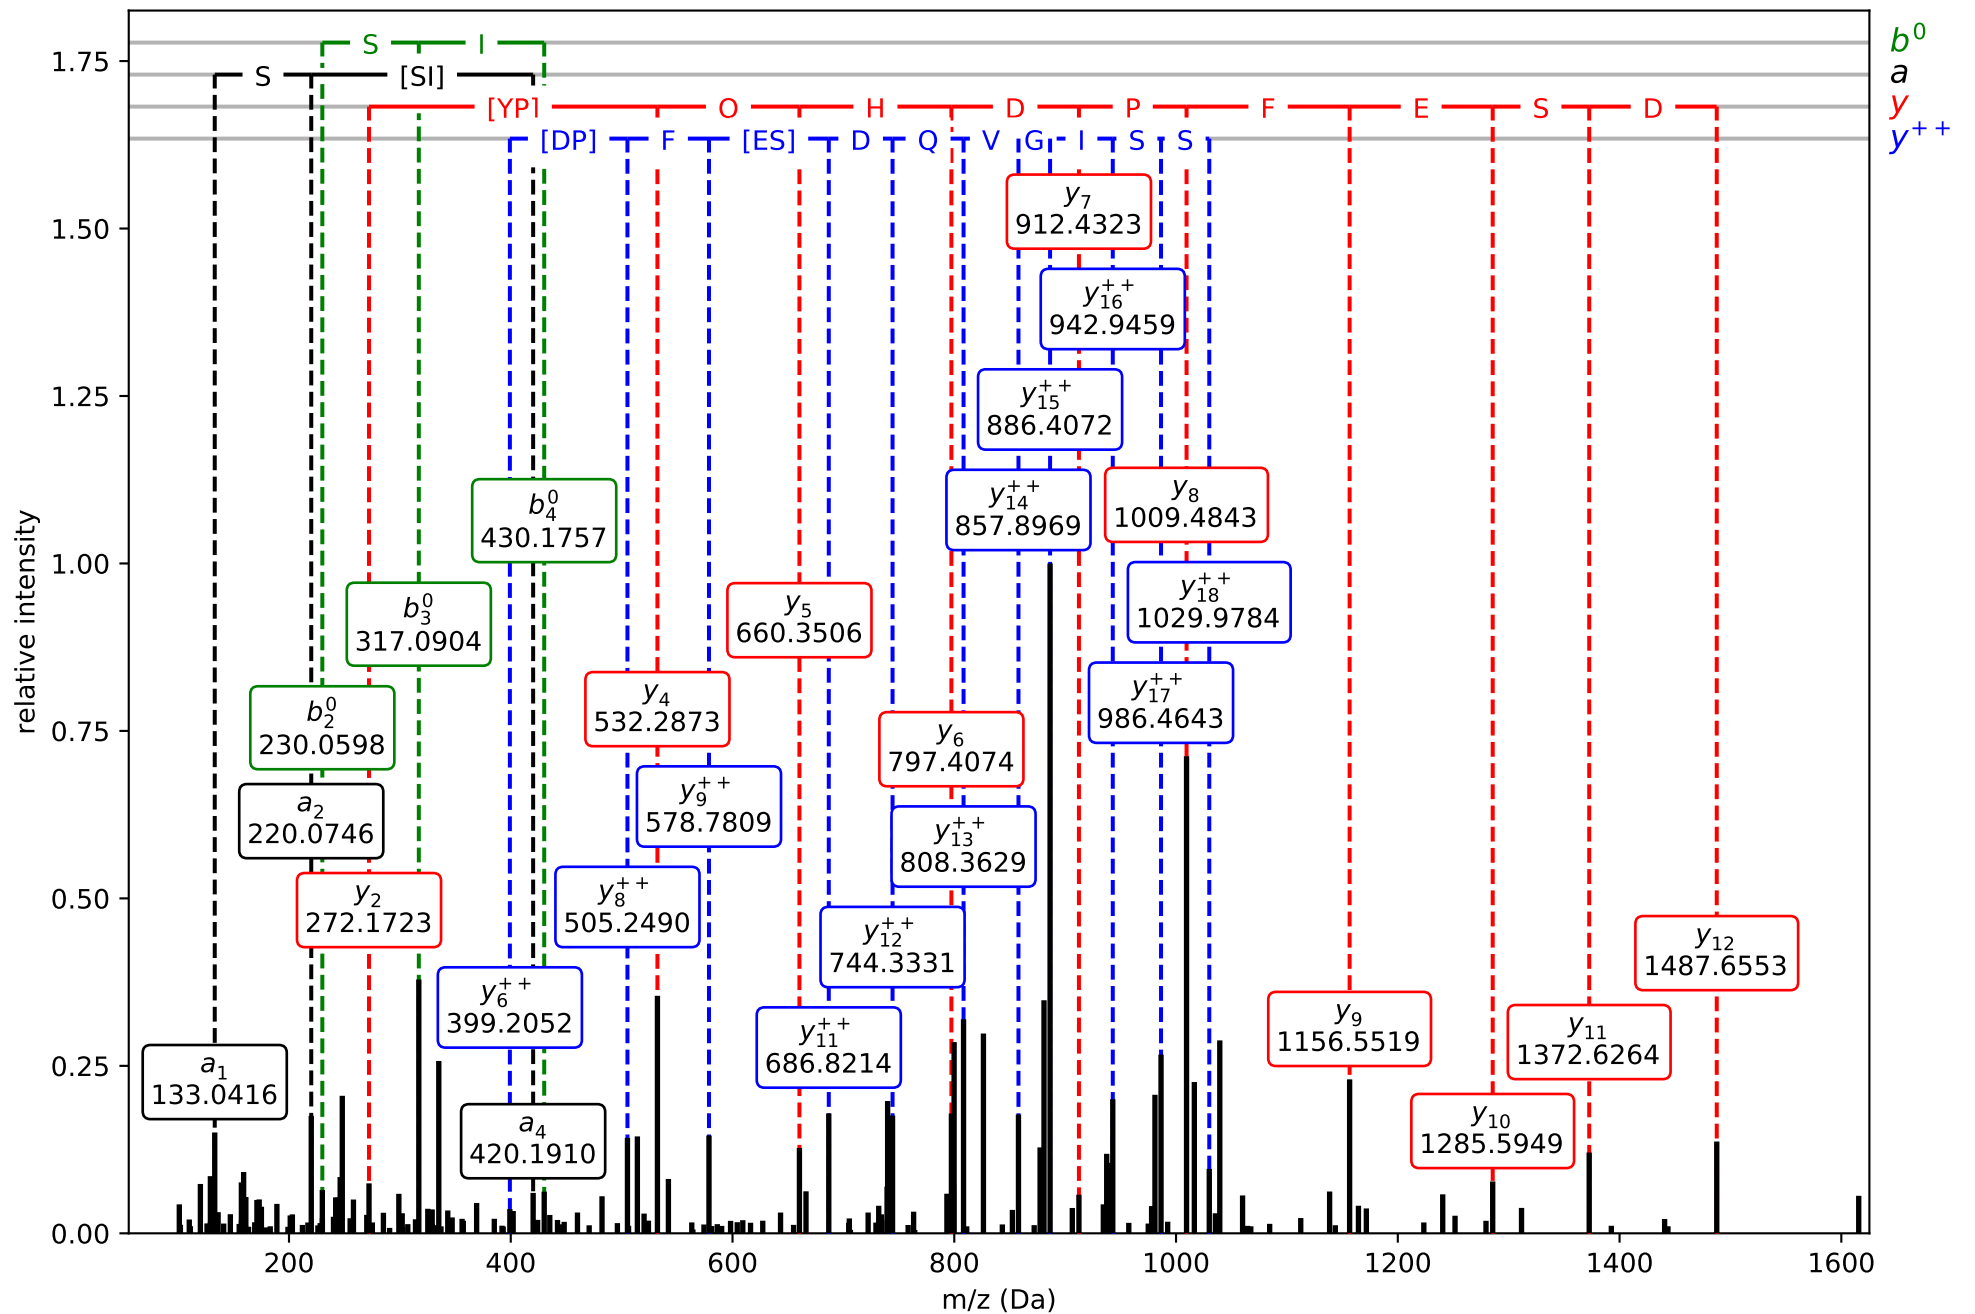

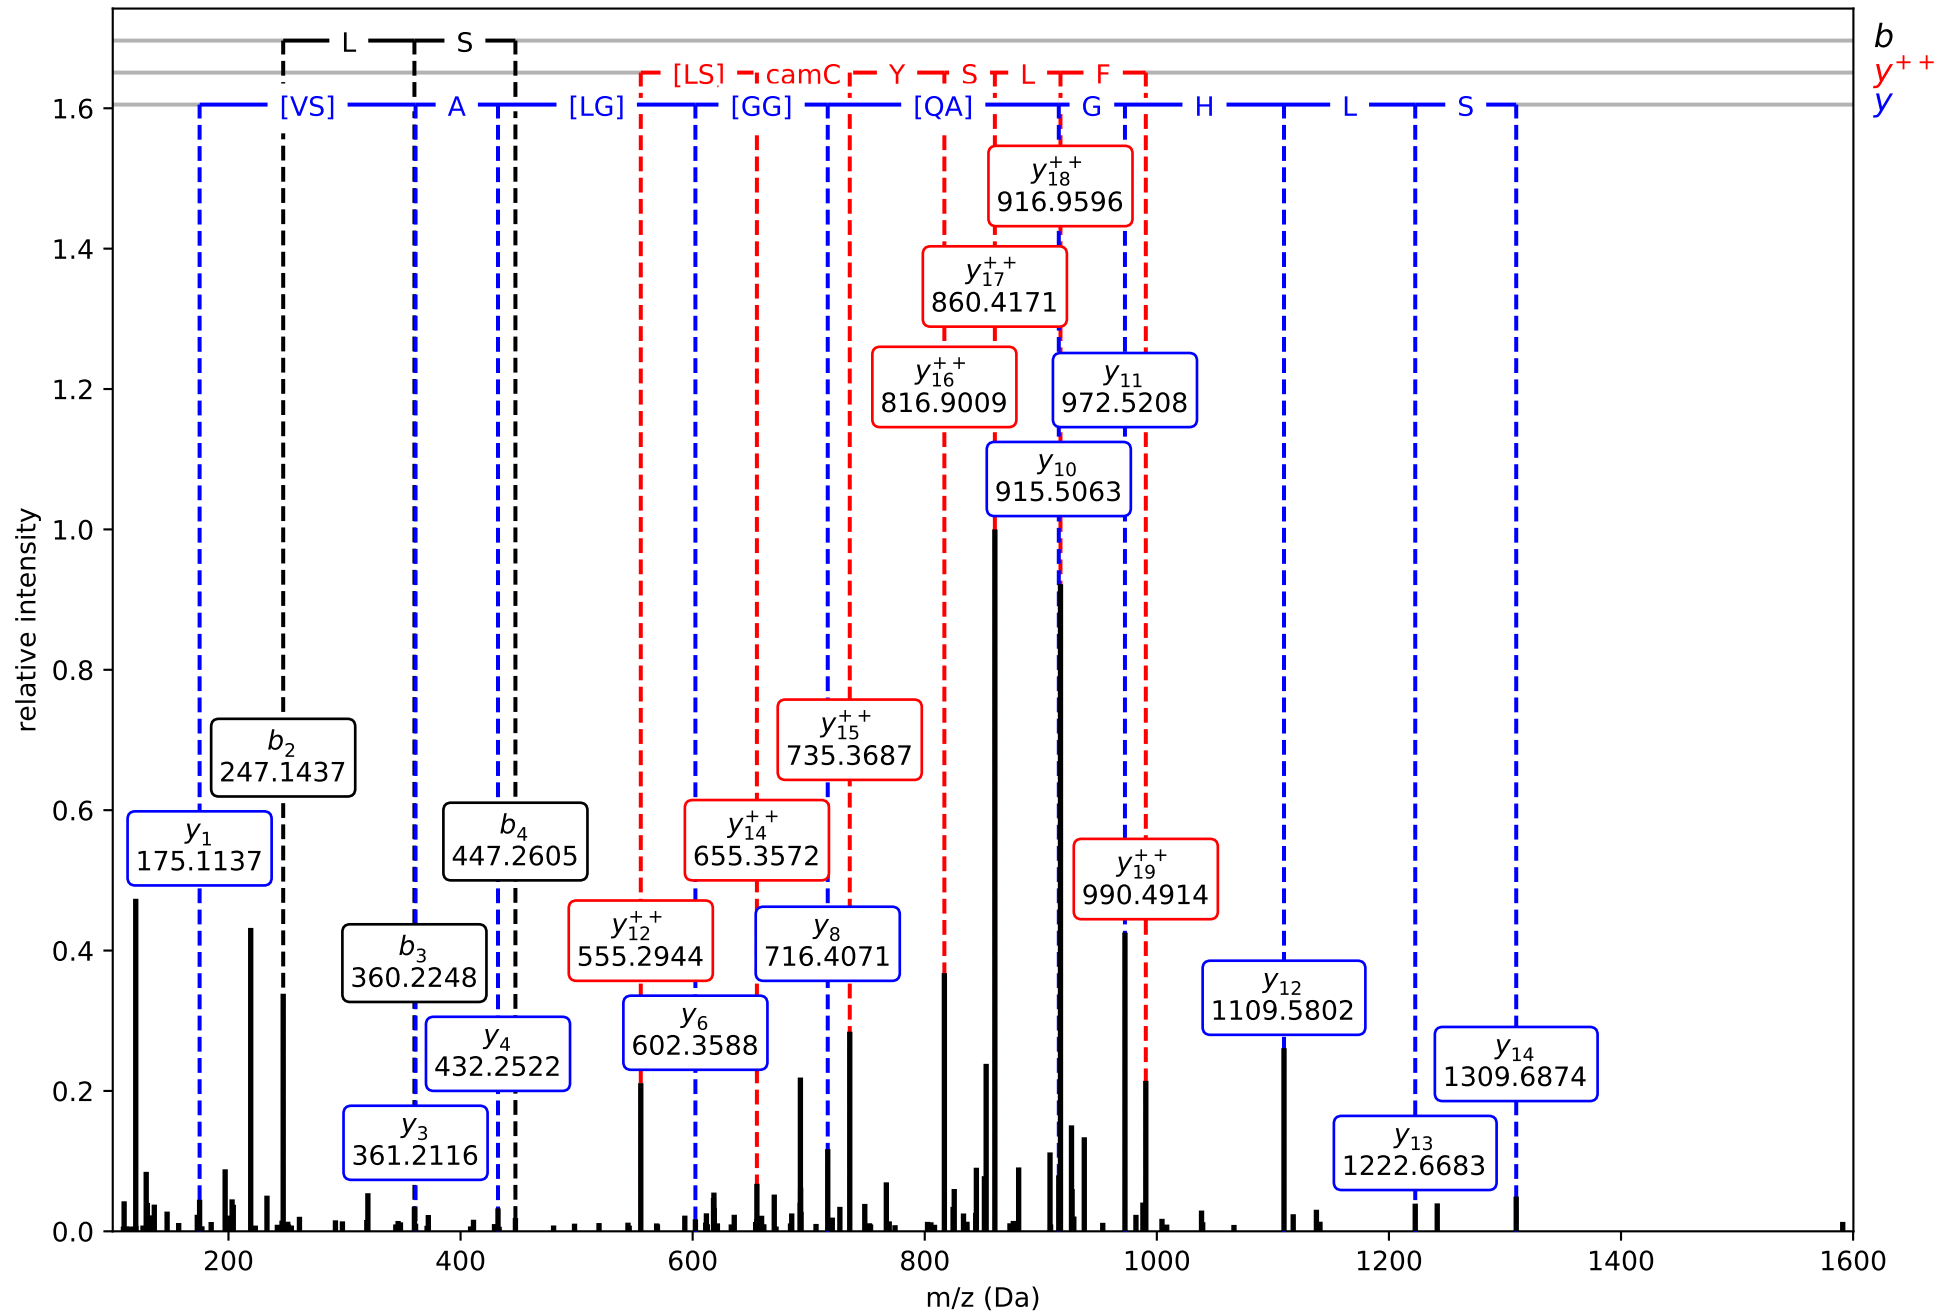

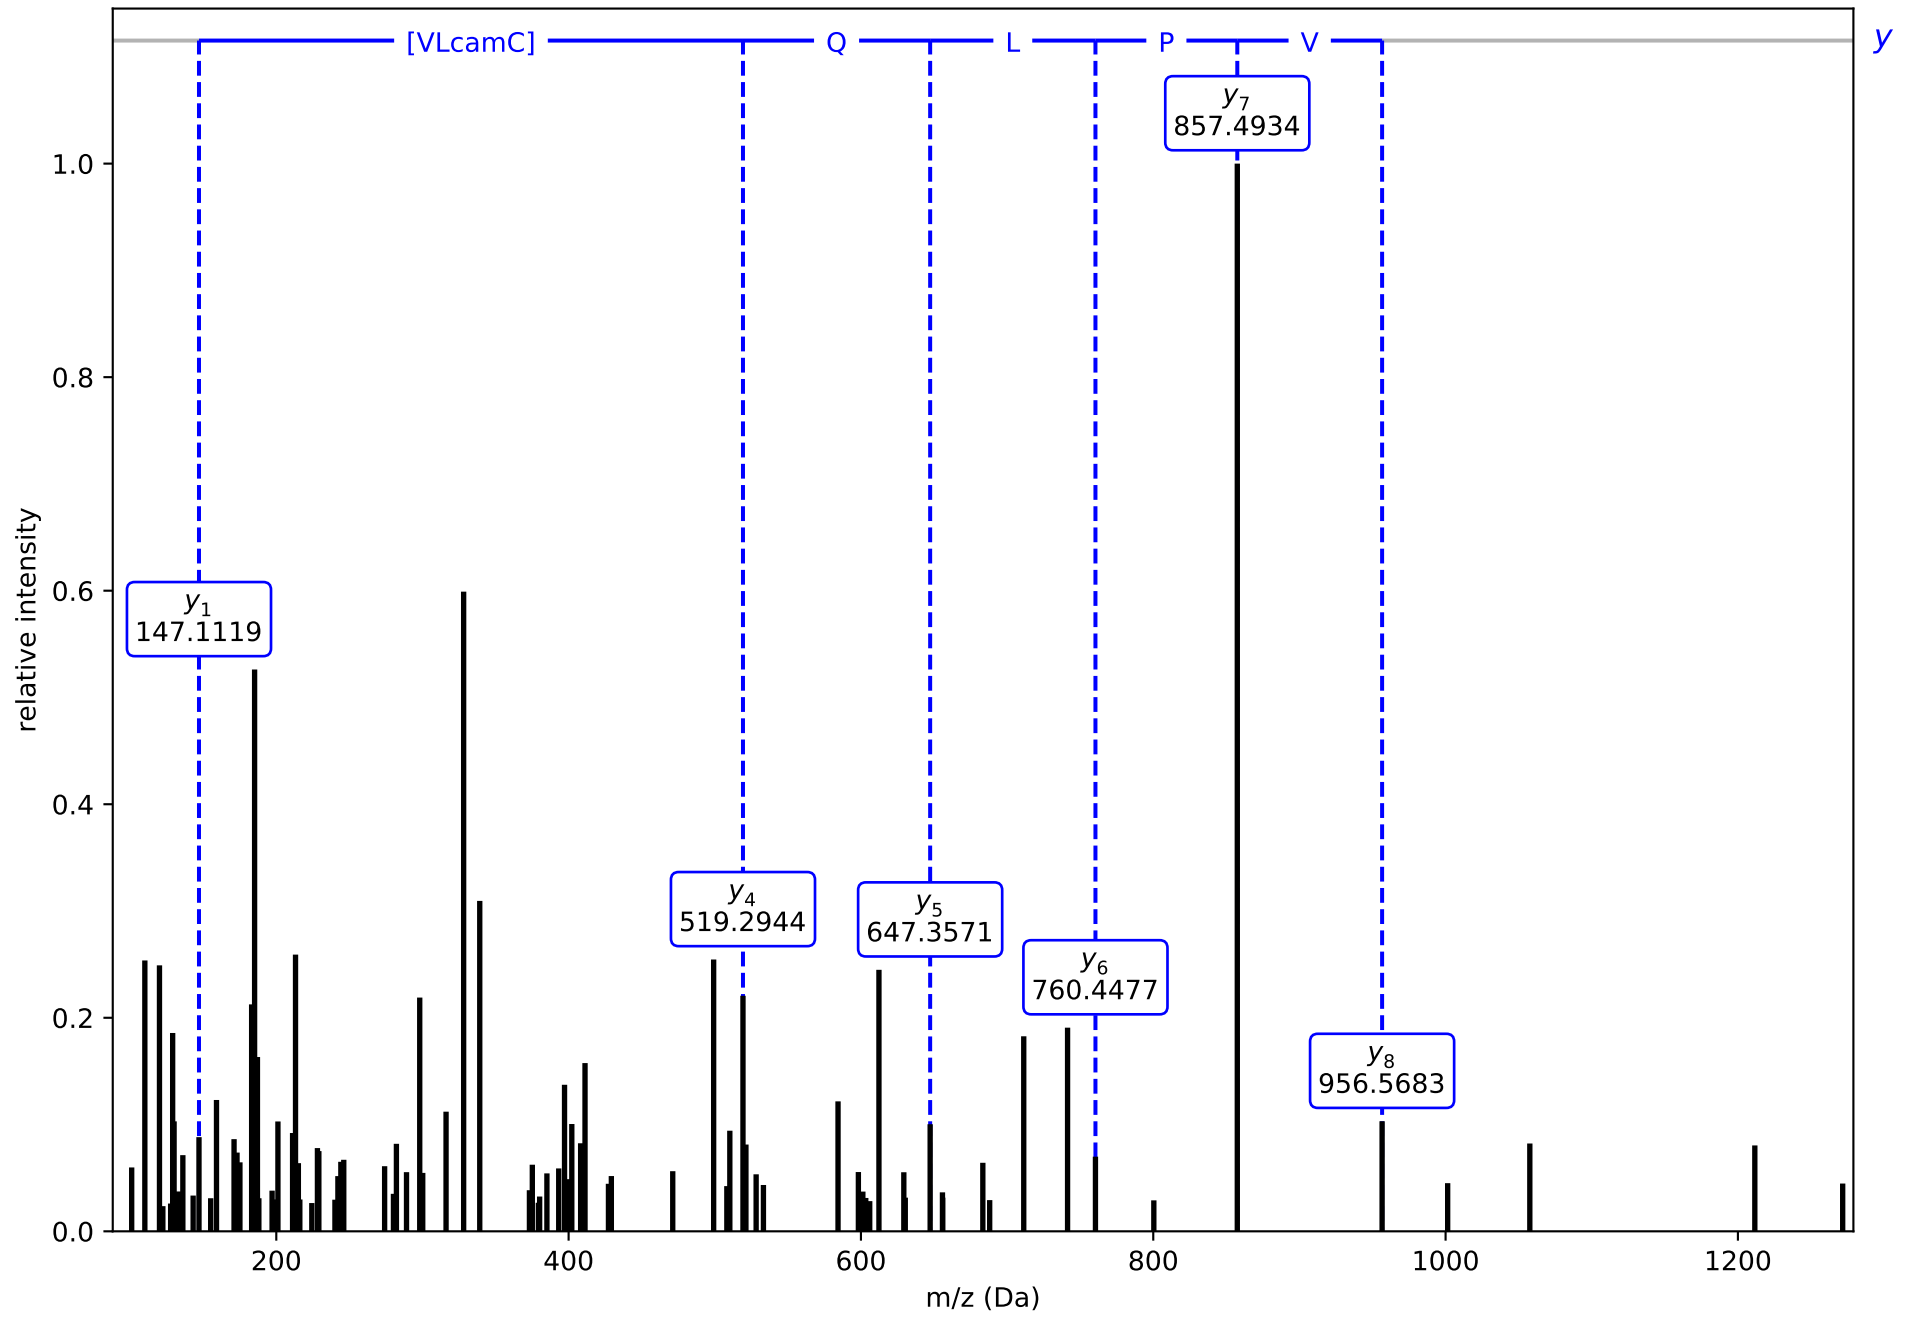

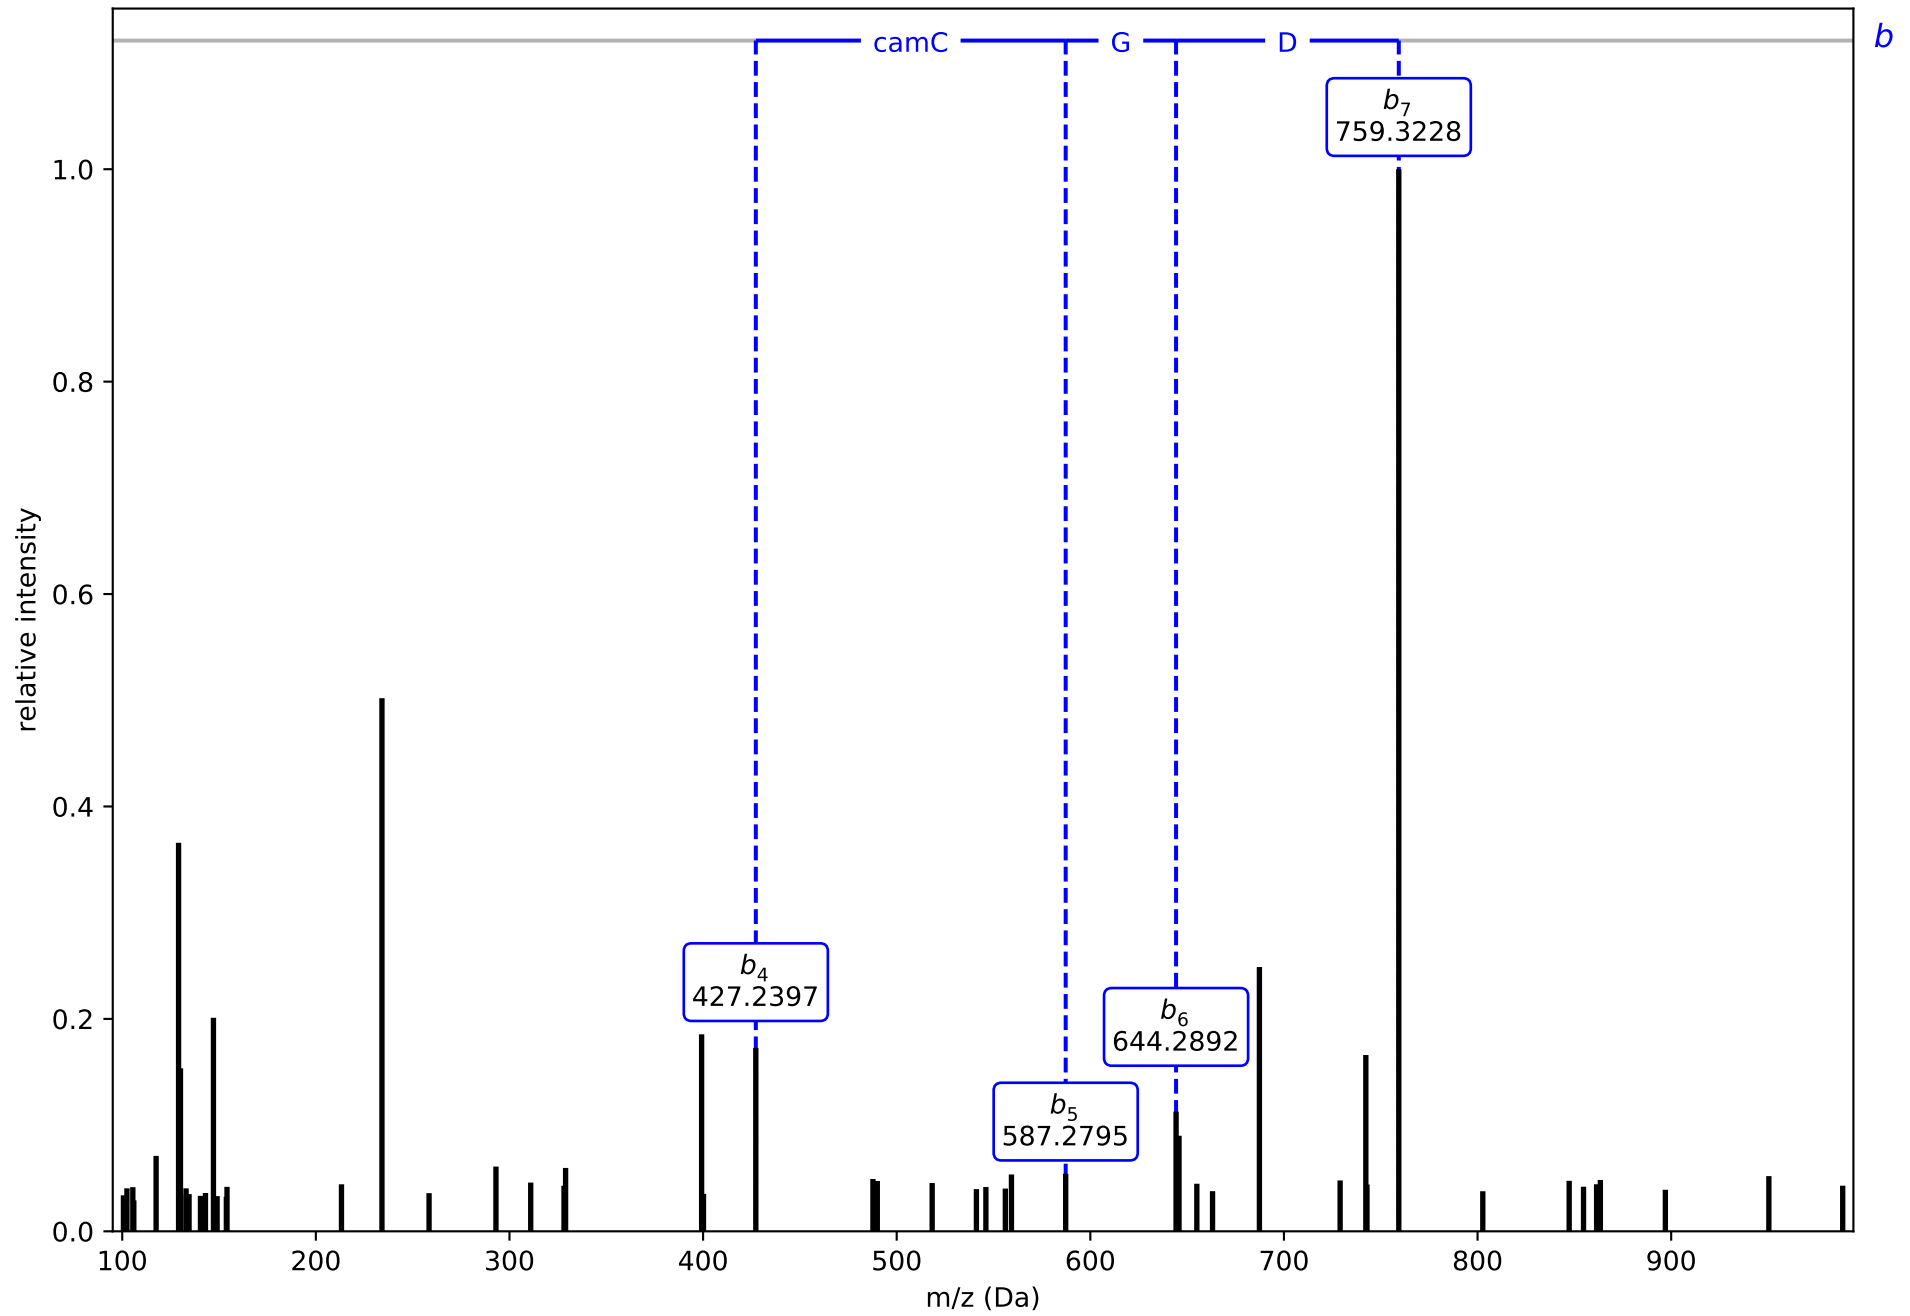

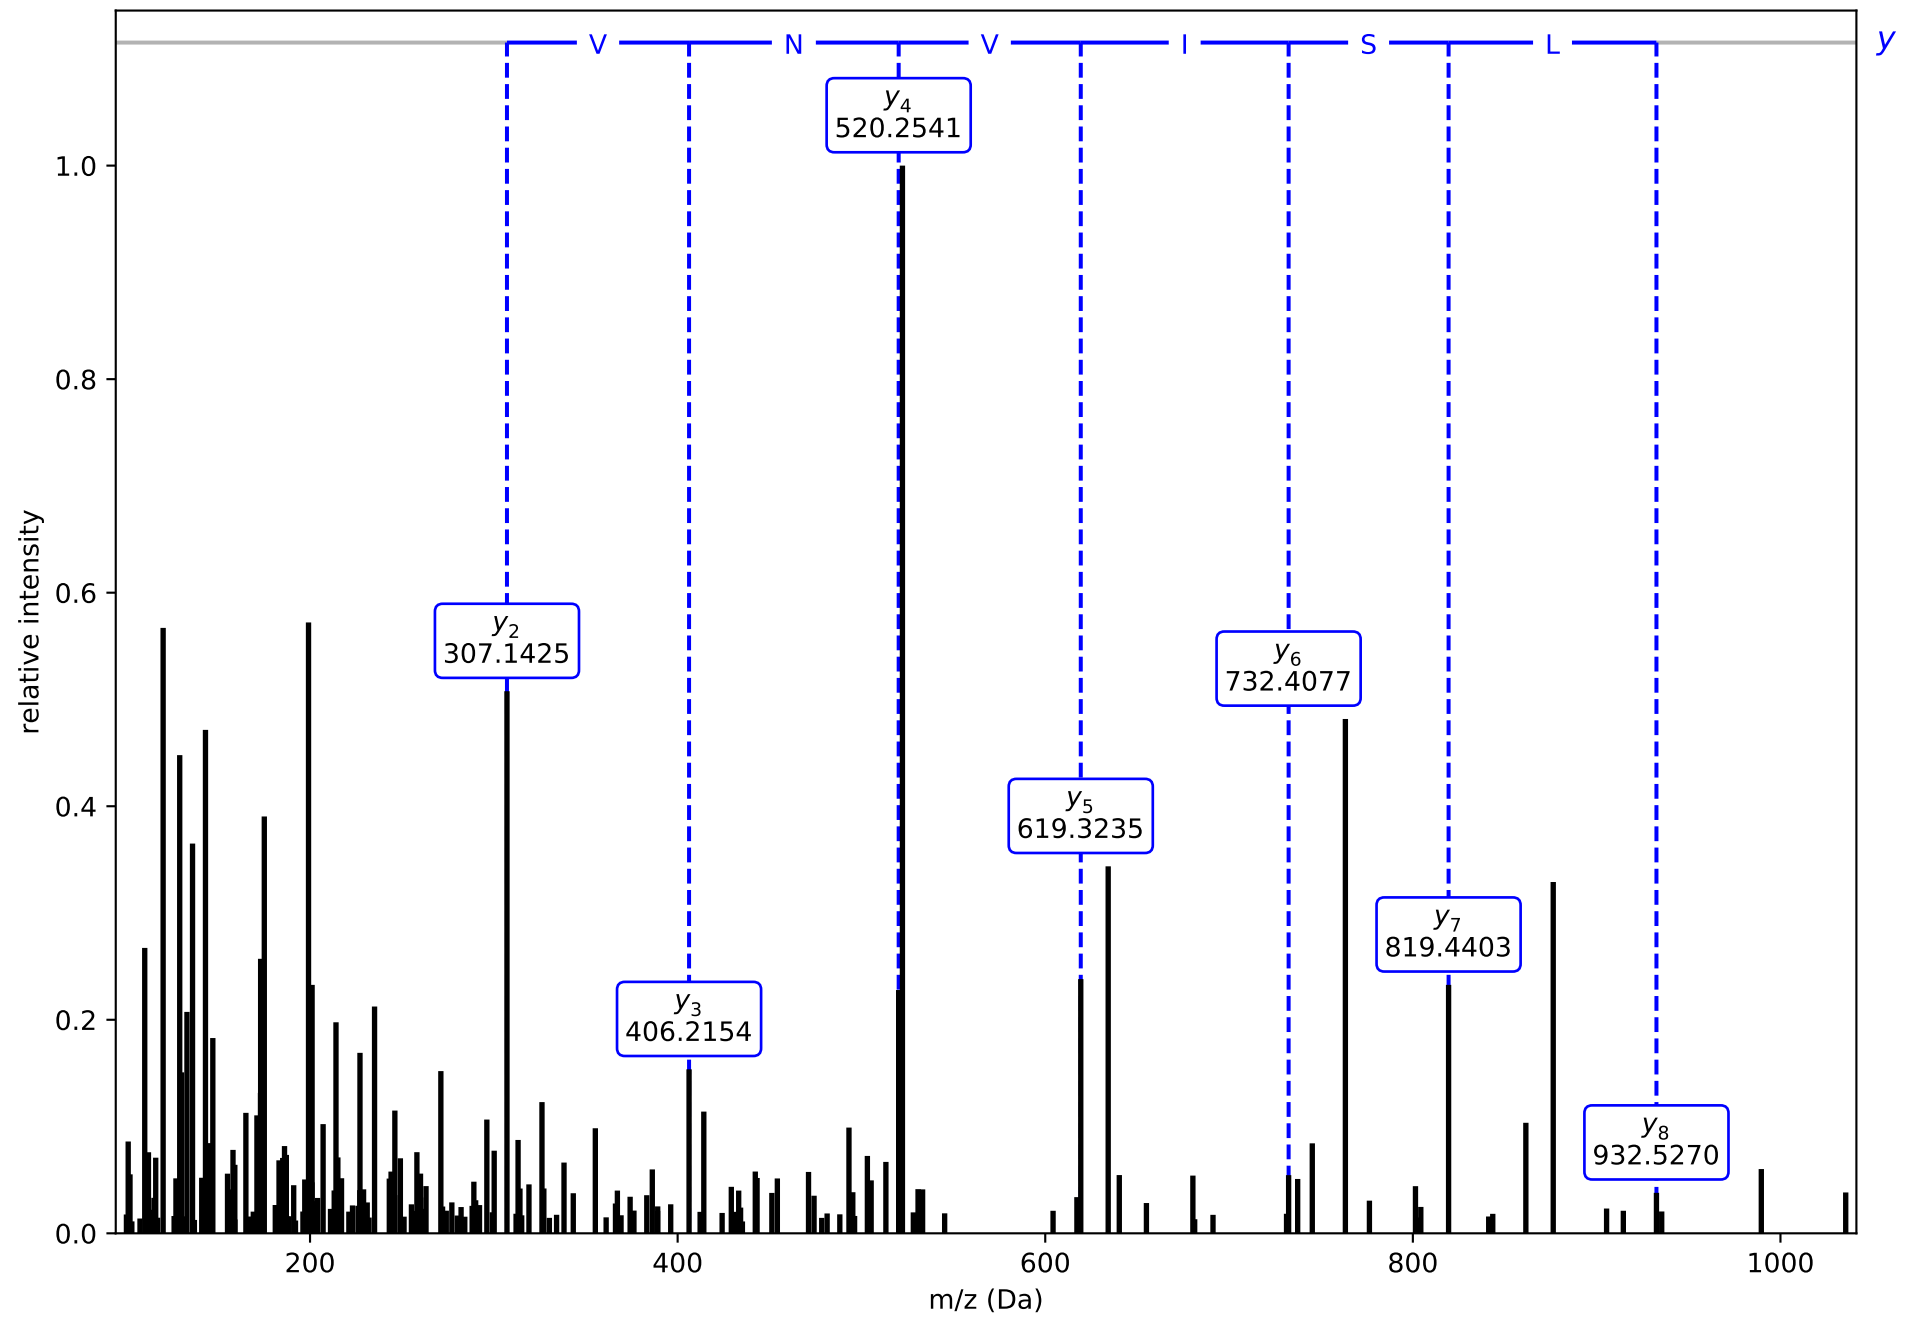



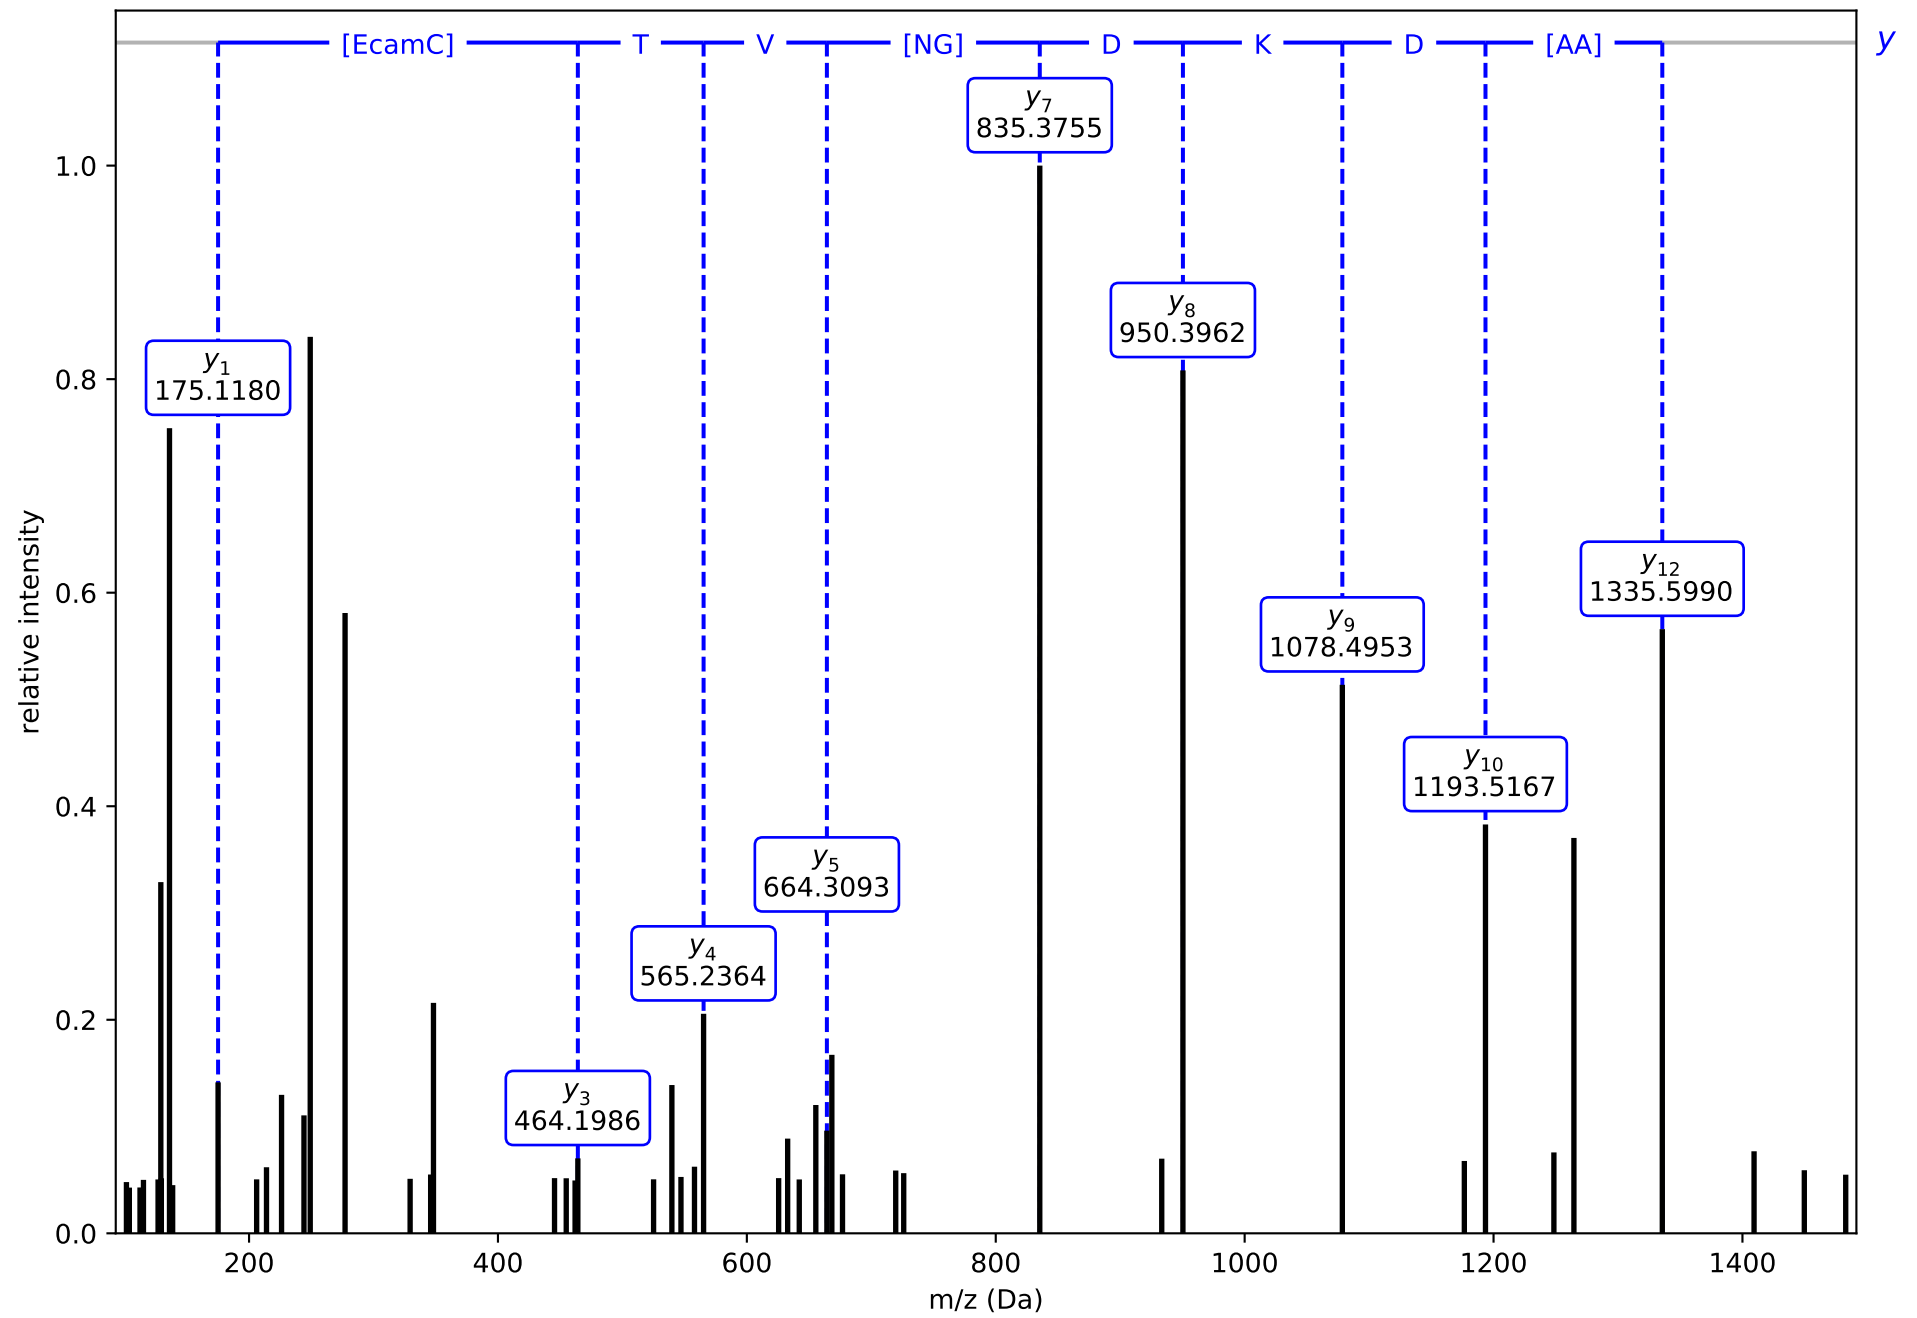

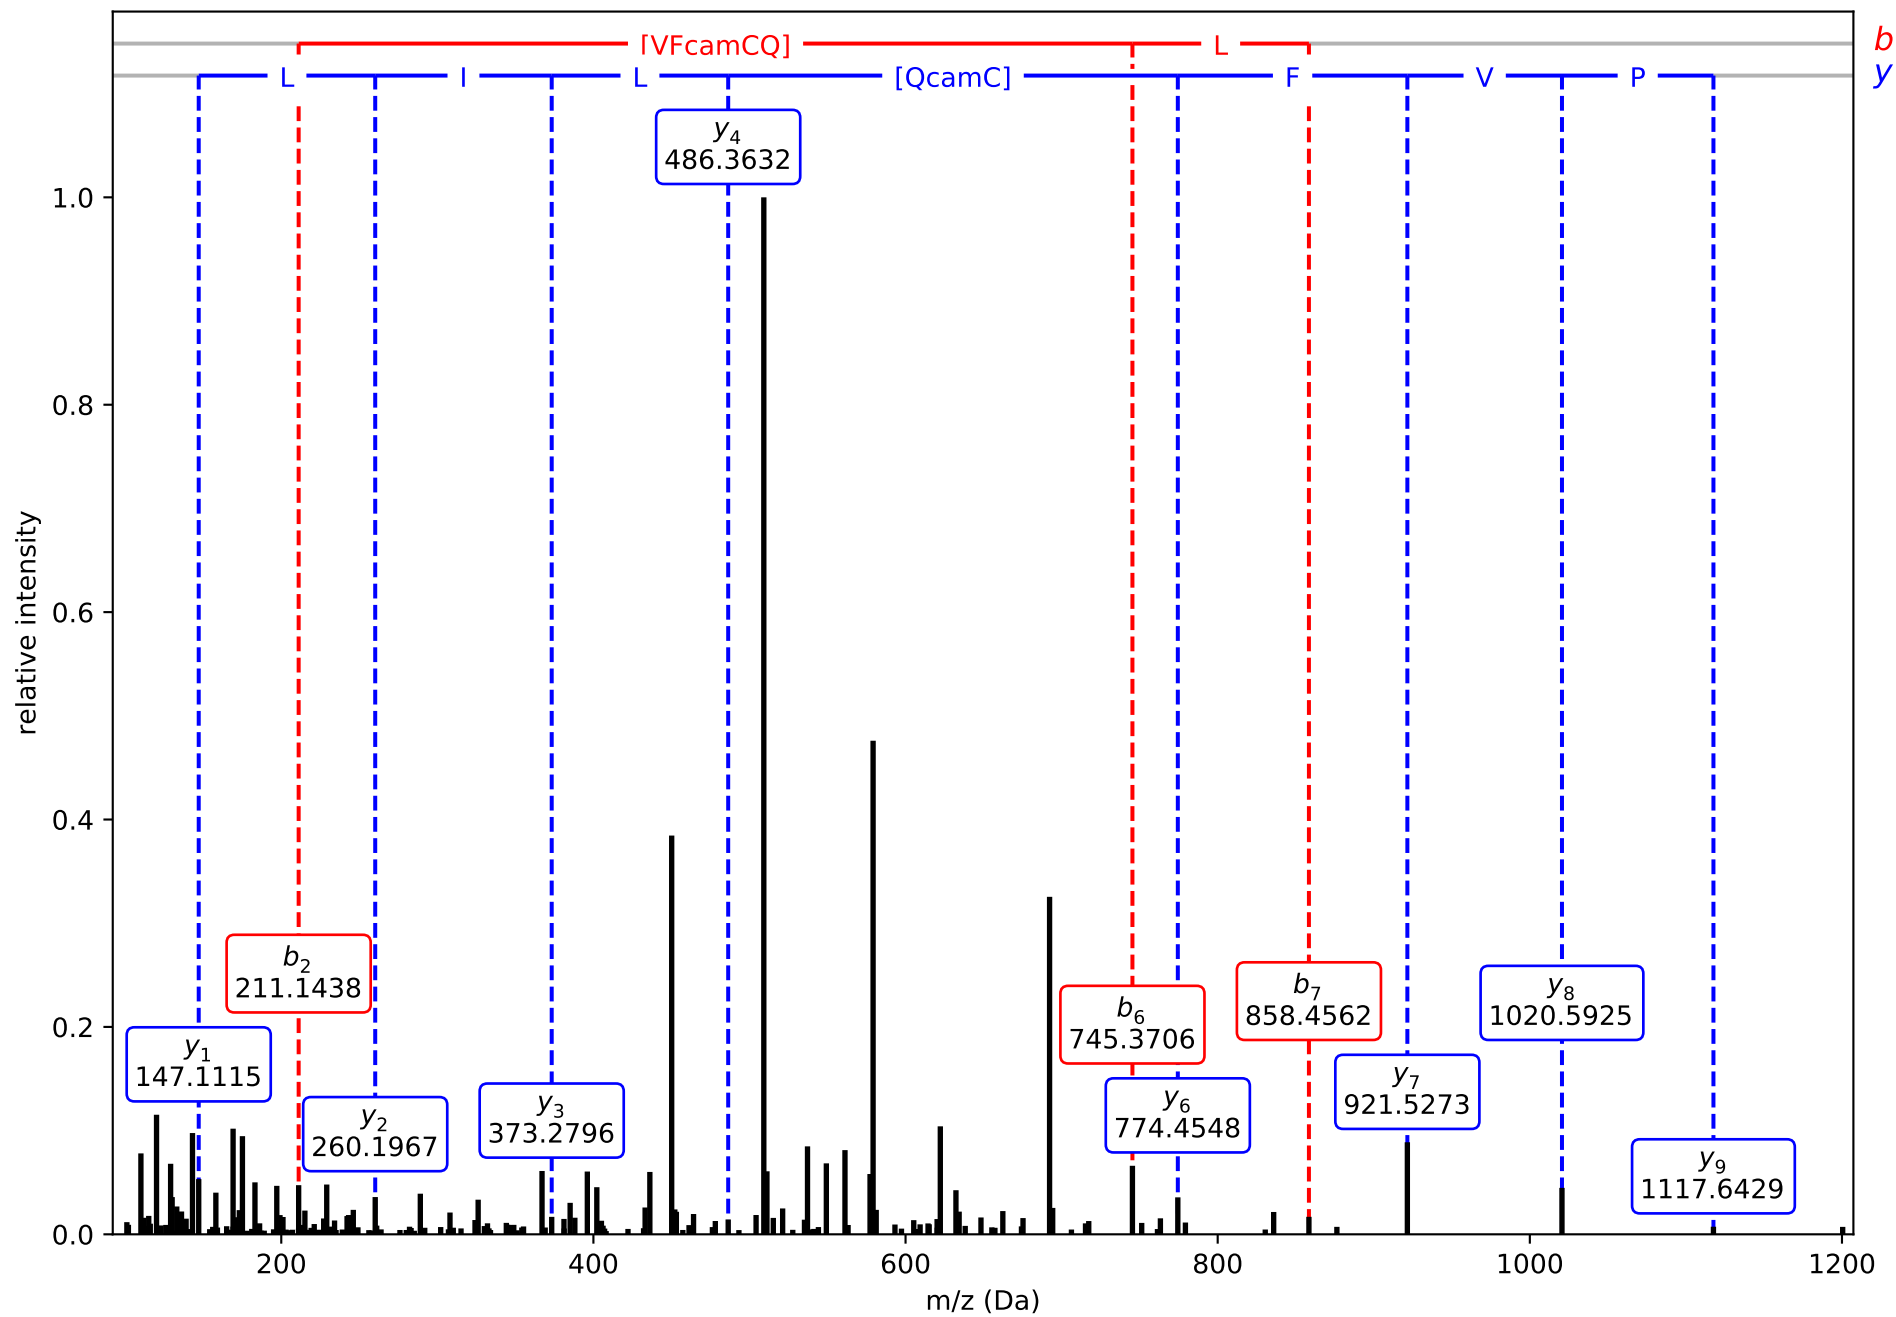

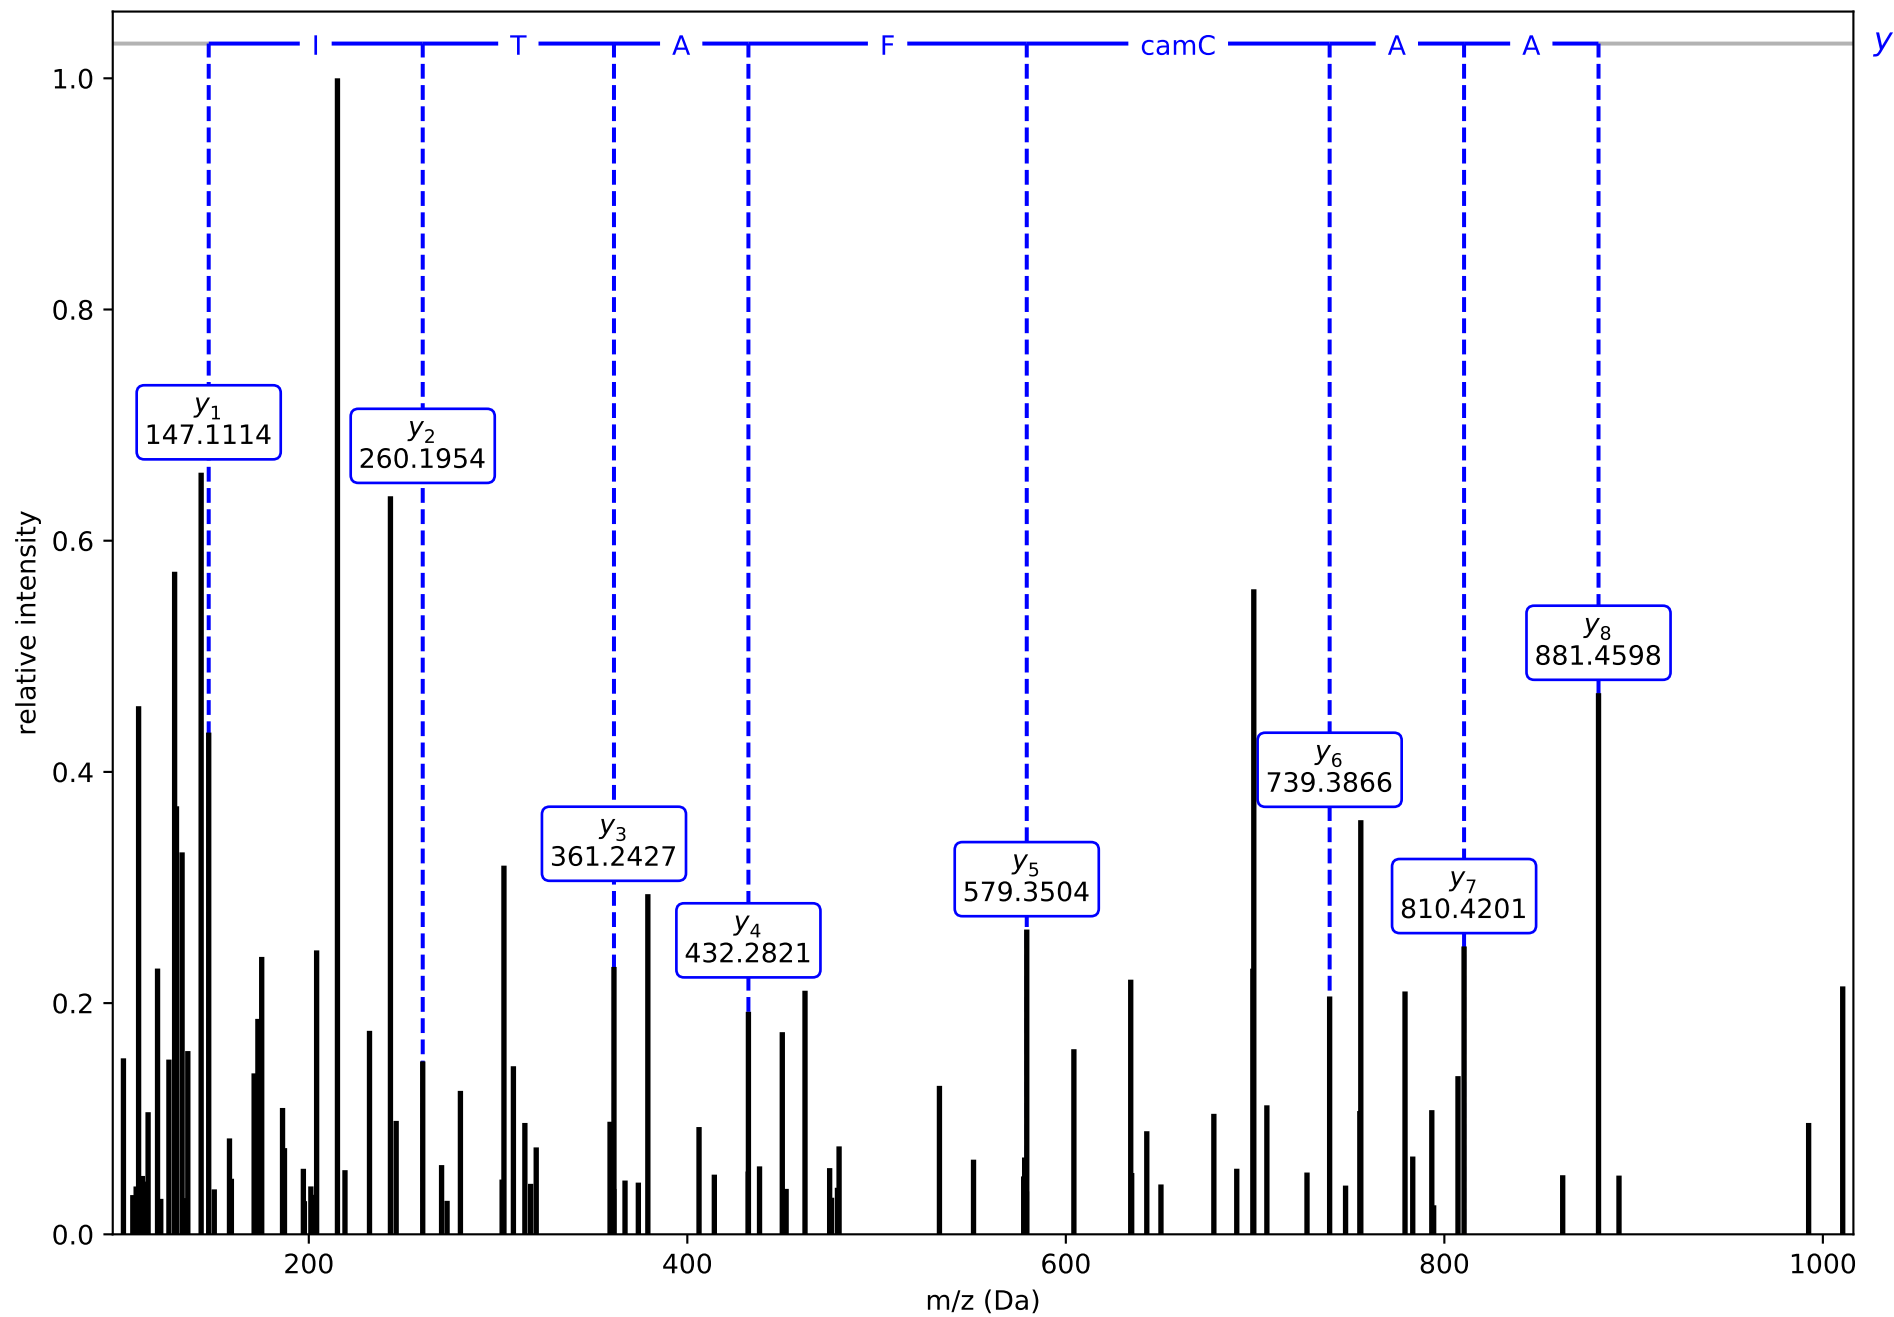

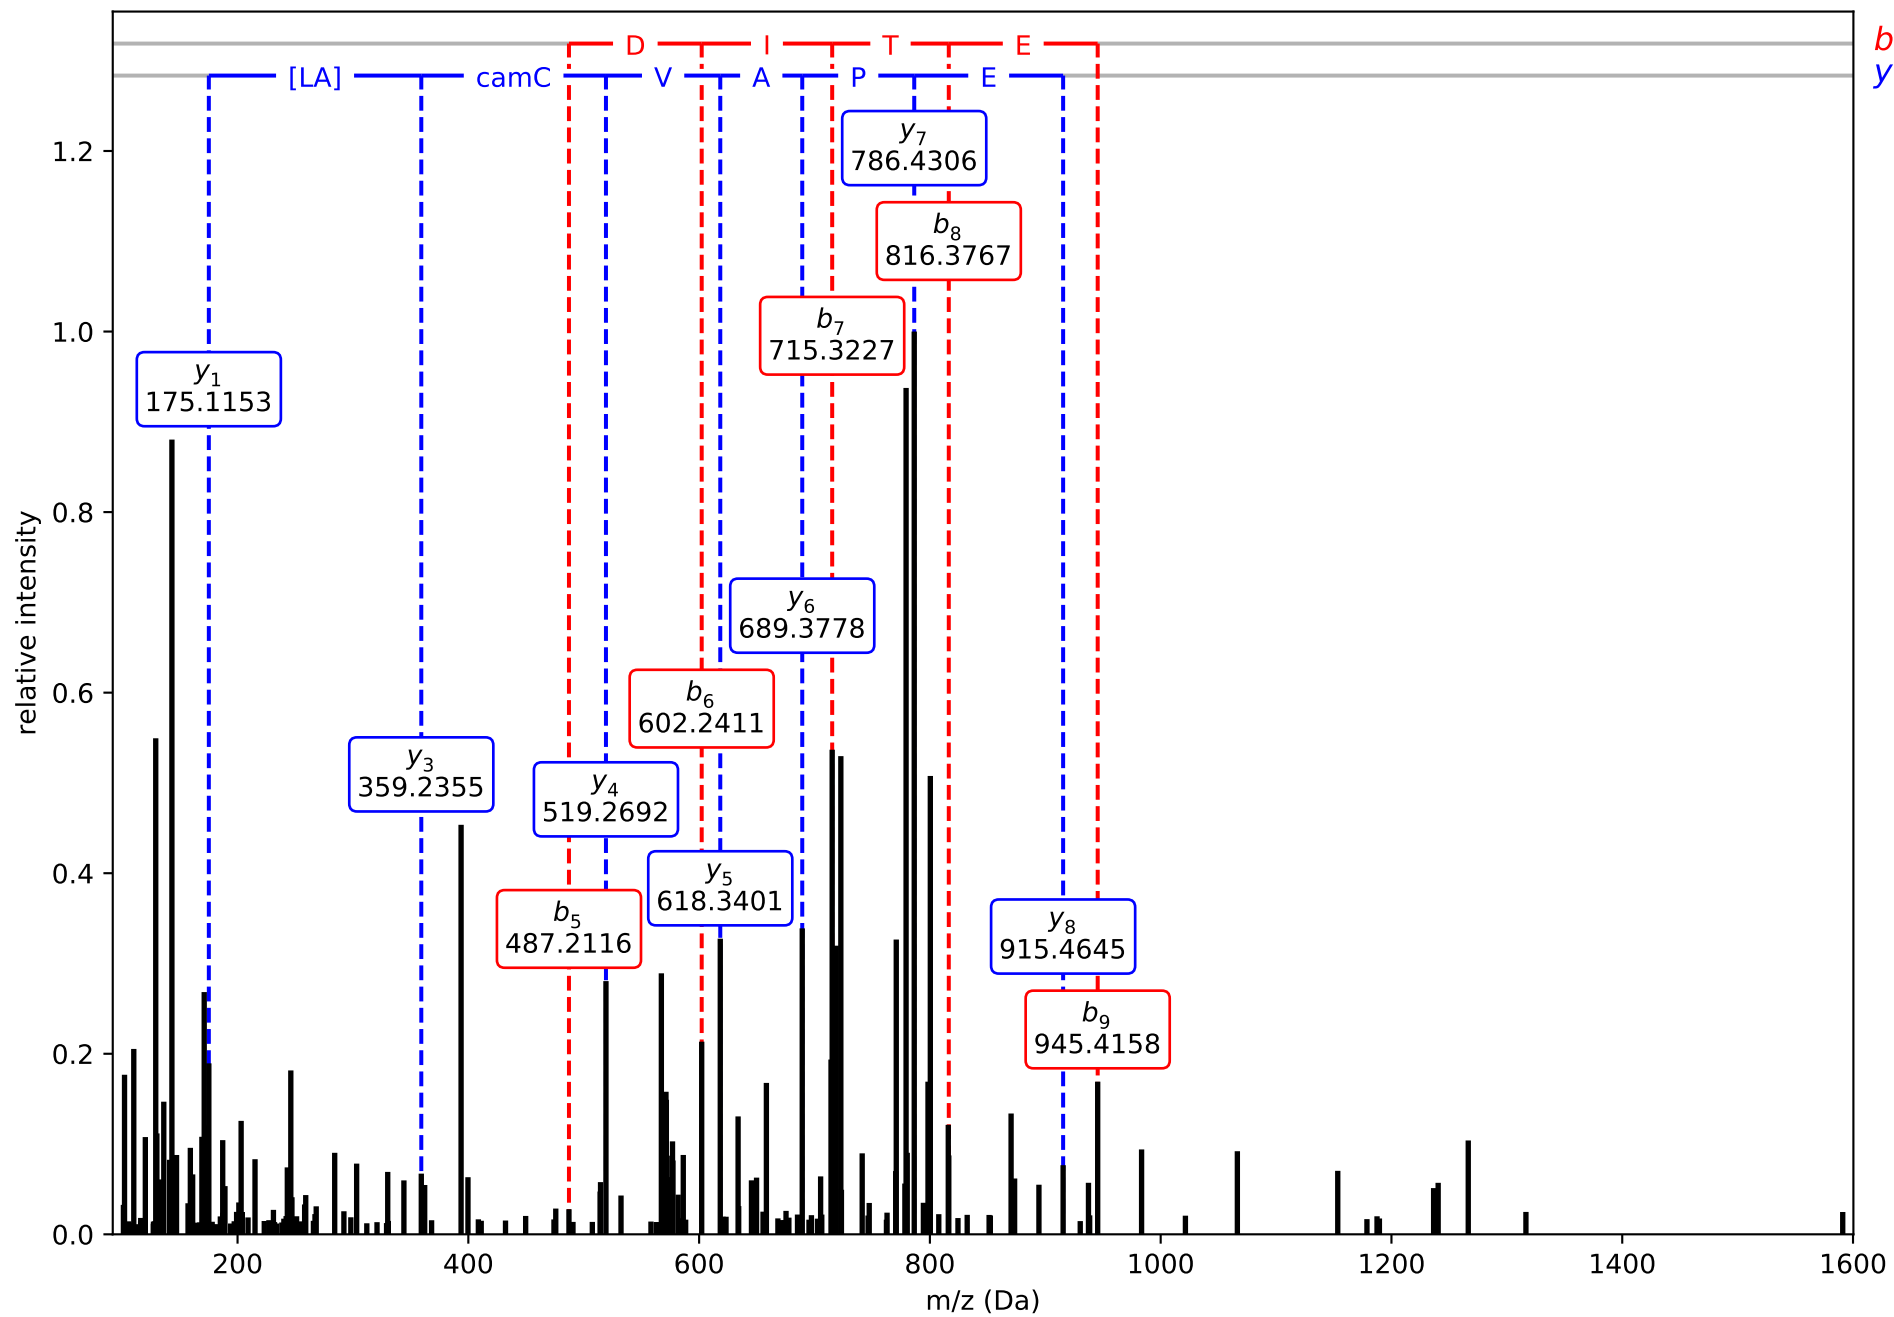

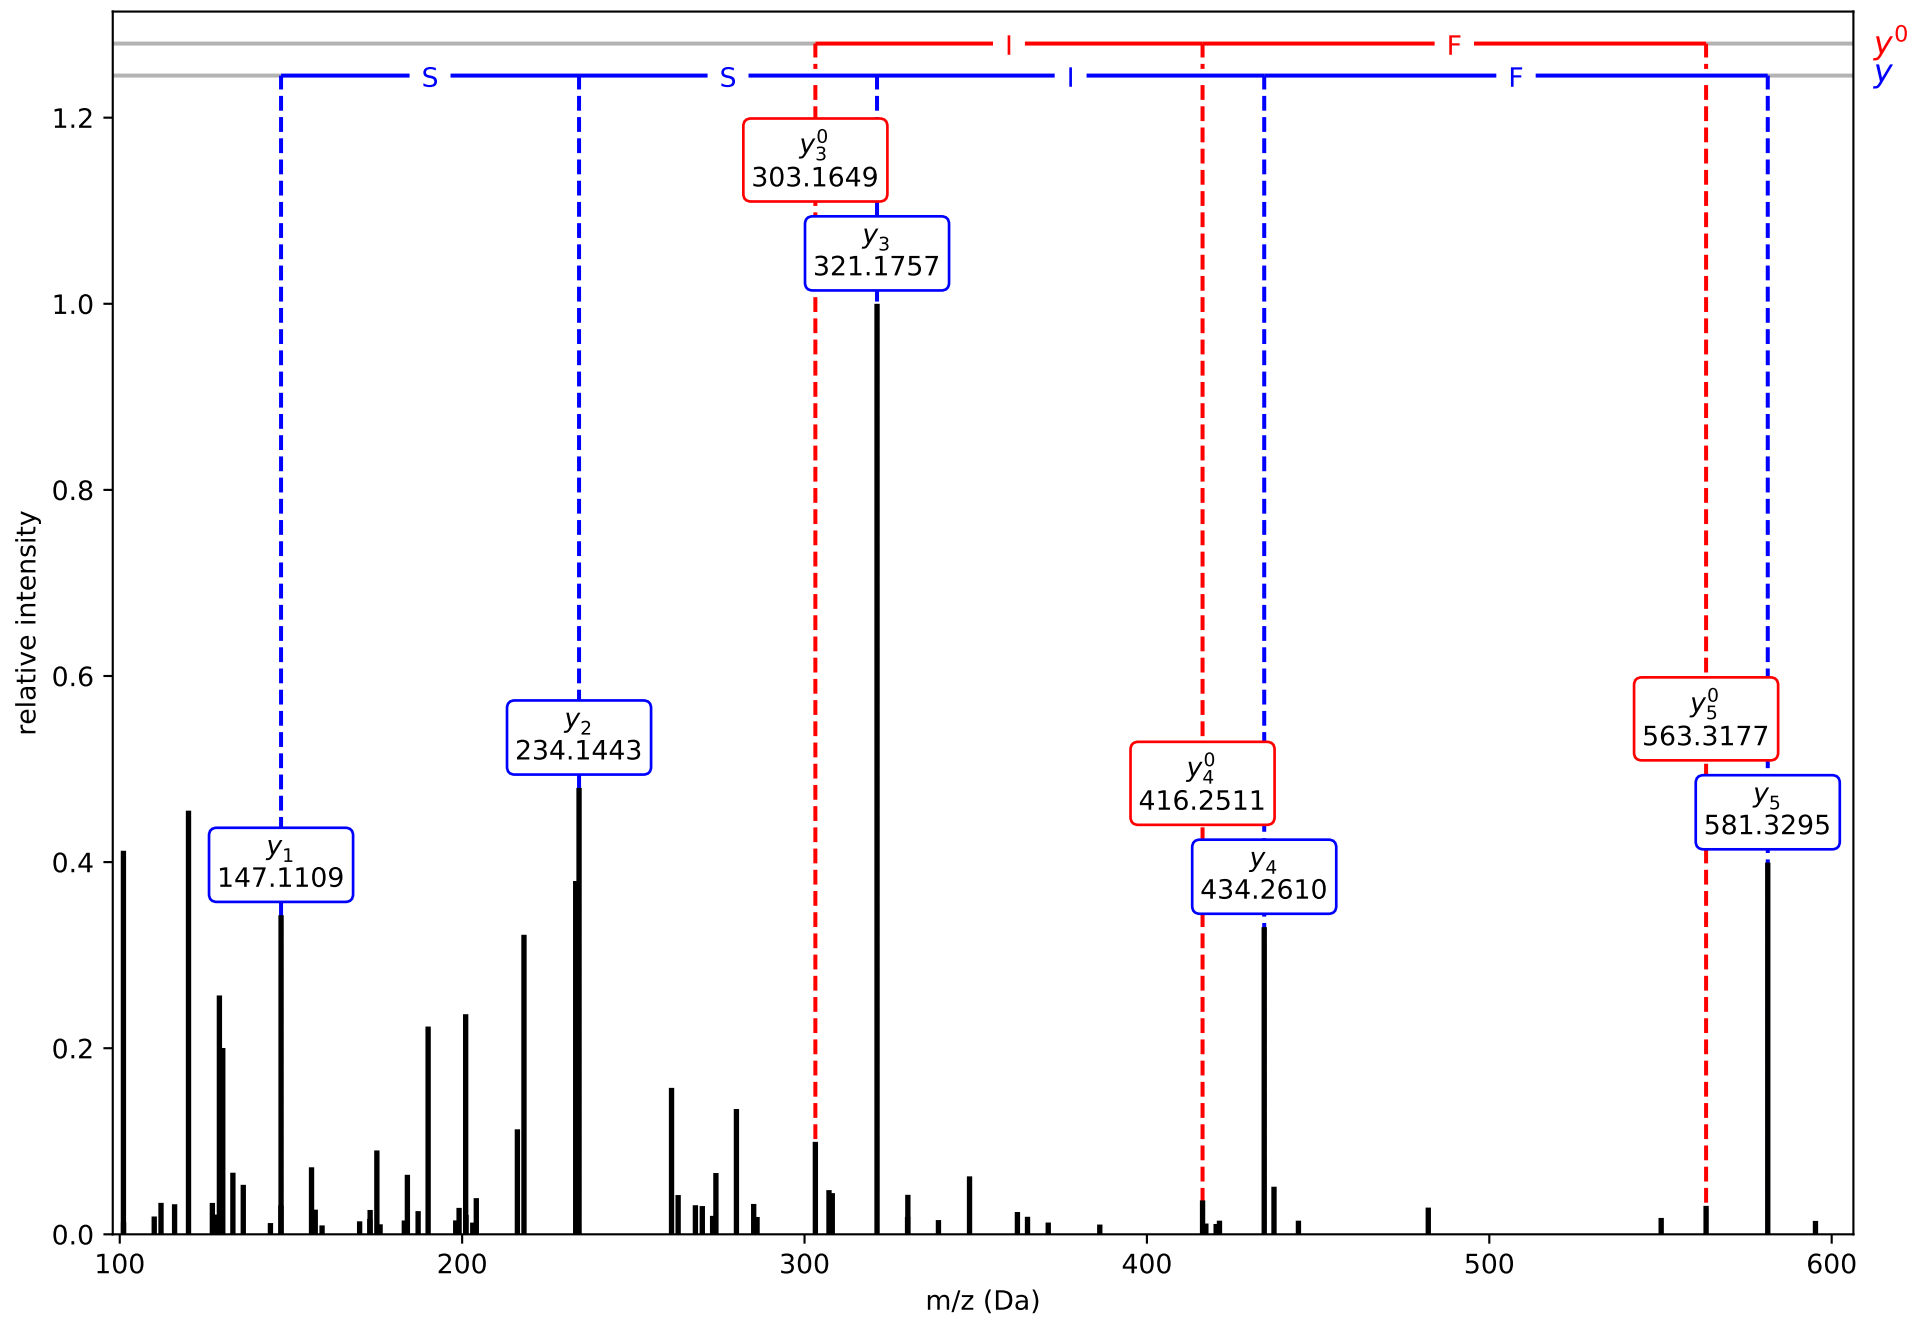

A2CG49 : TSEQVcamCSVLESLEQEYR

parent: 1028.9720, 2+

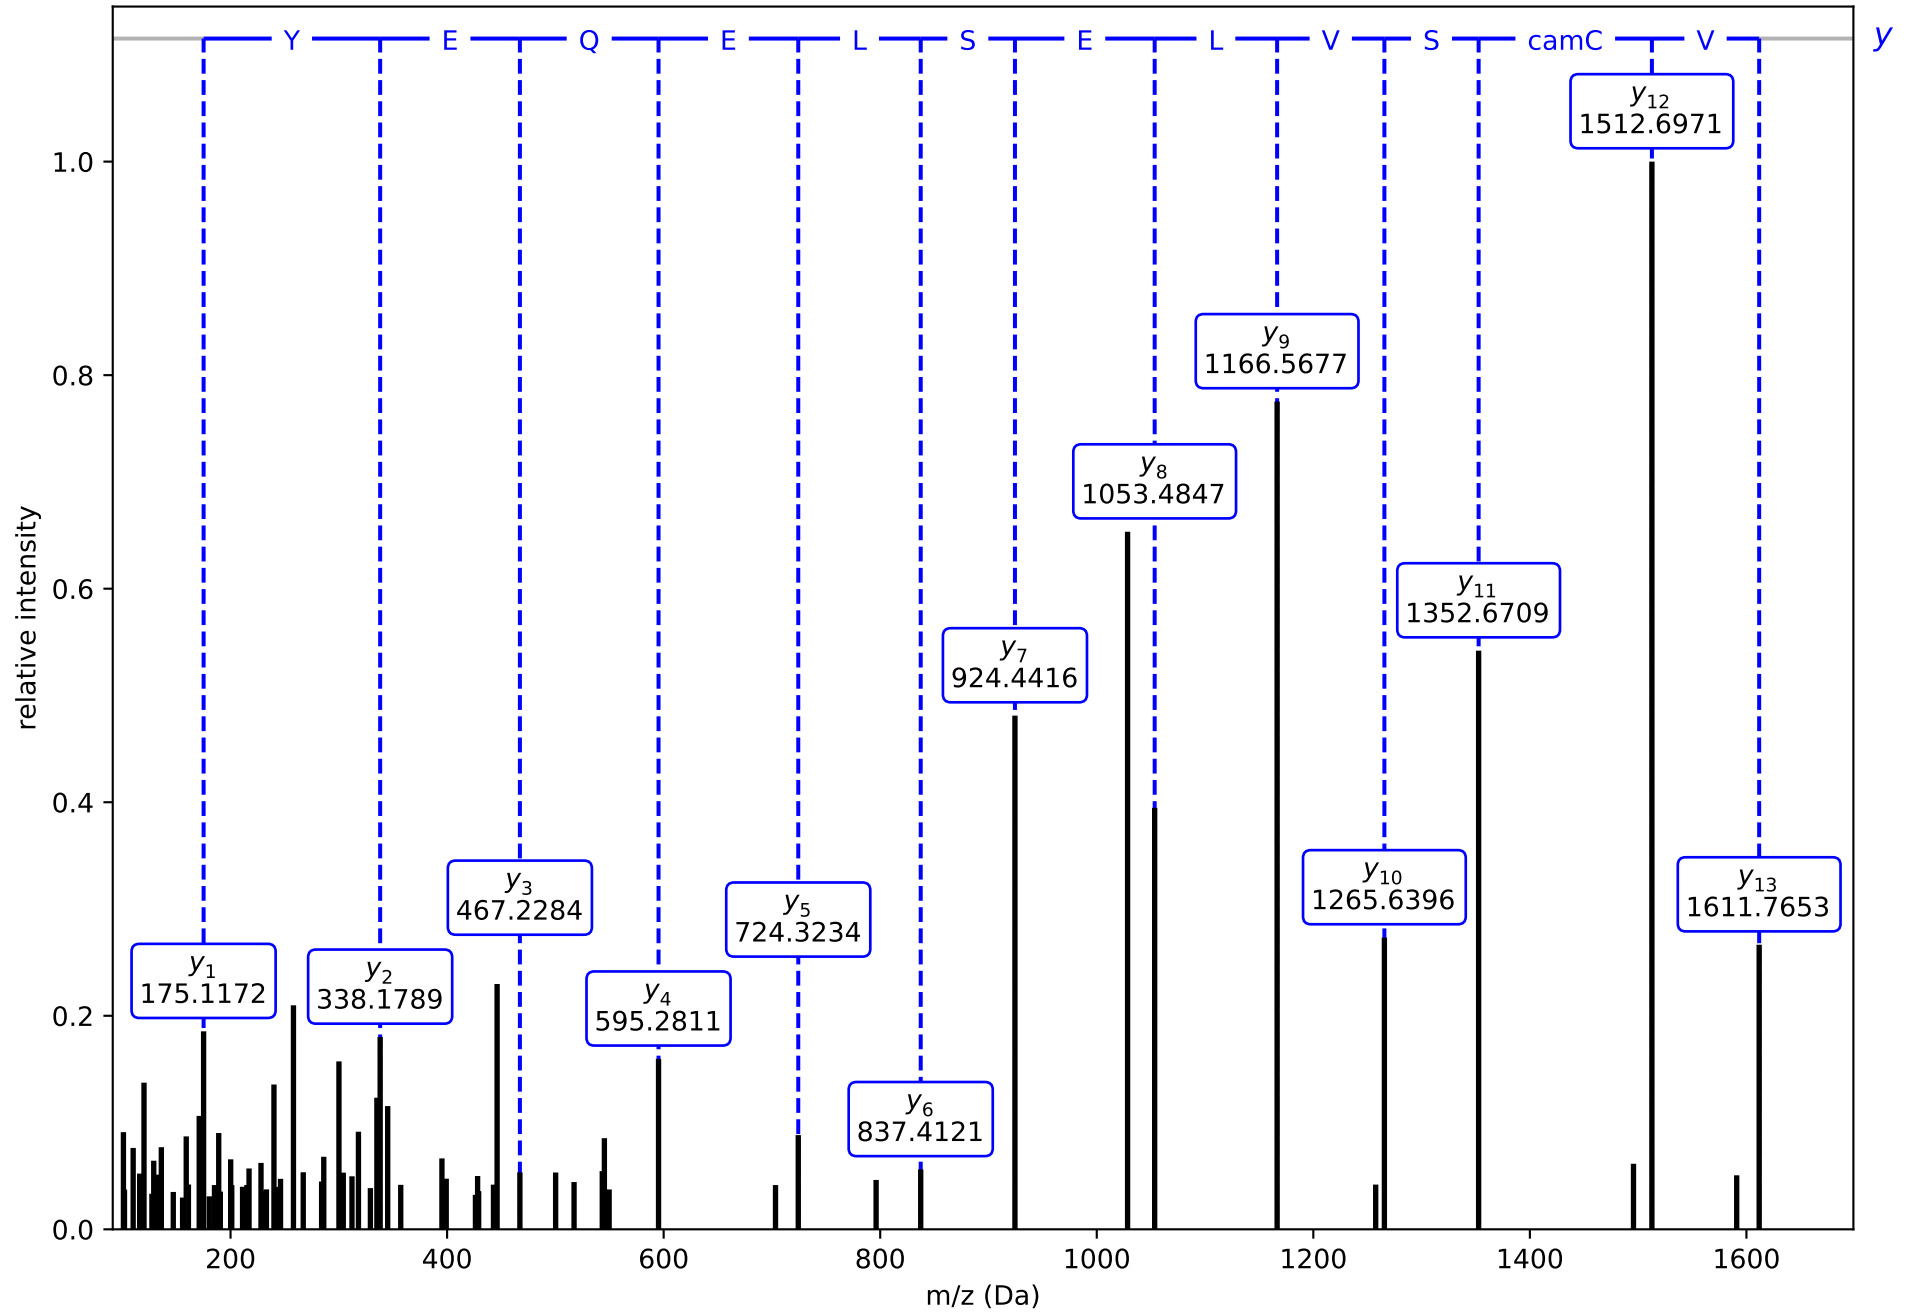

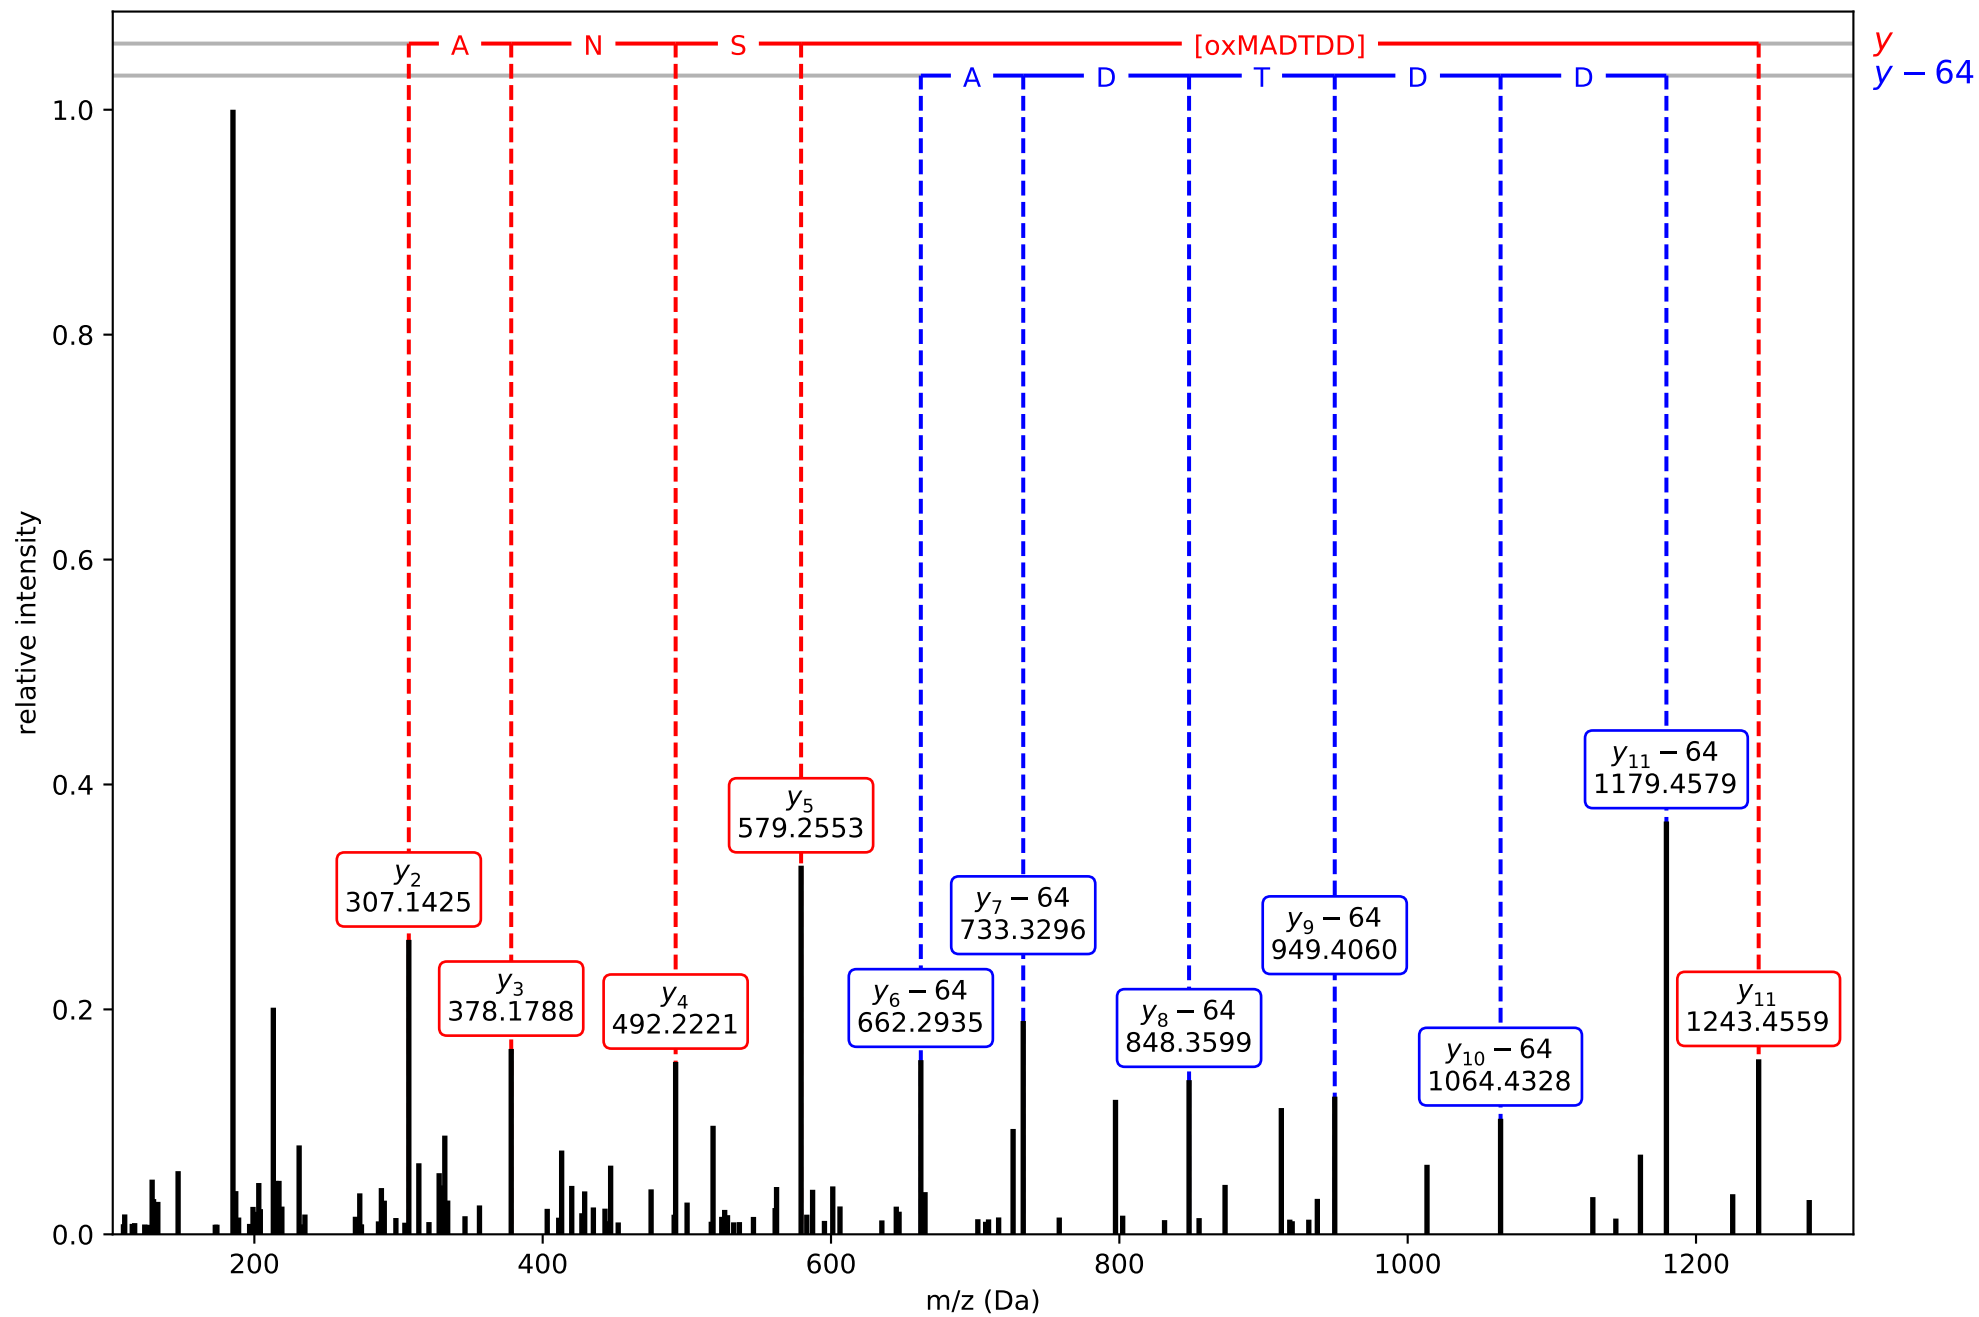

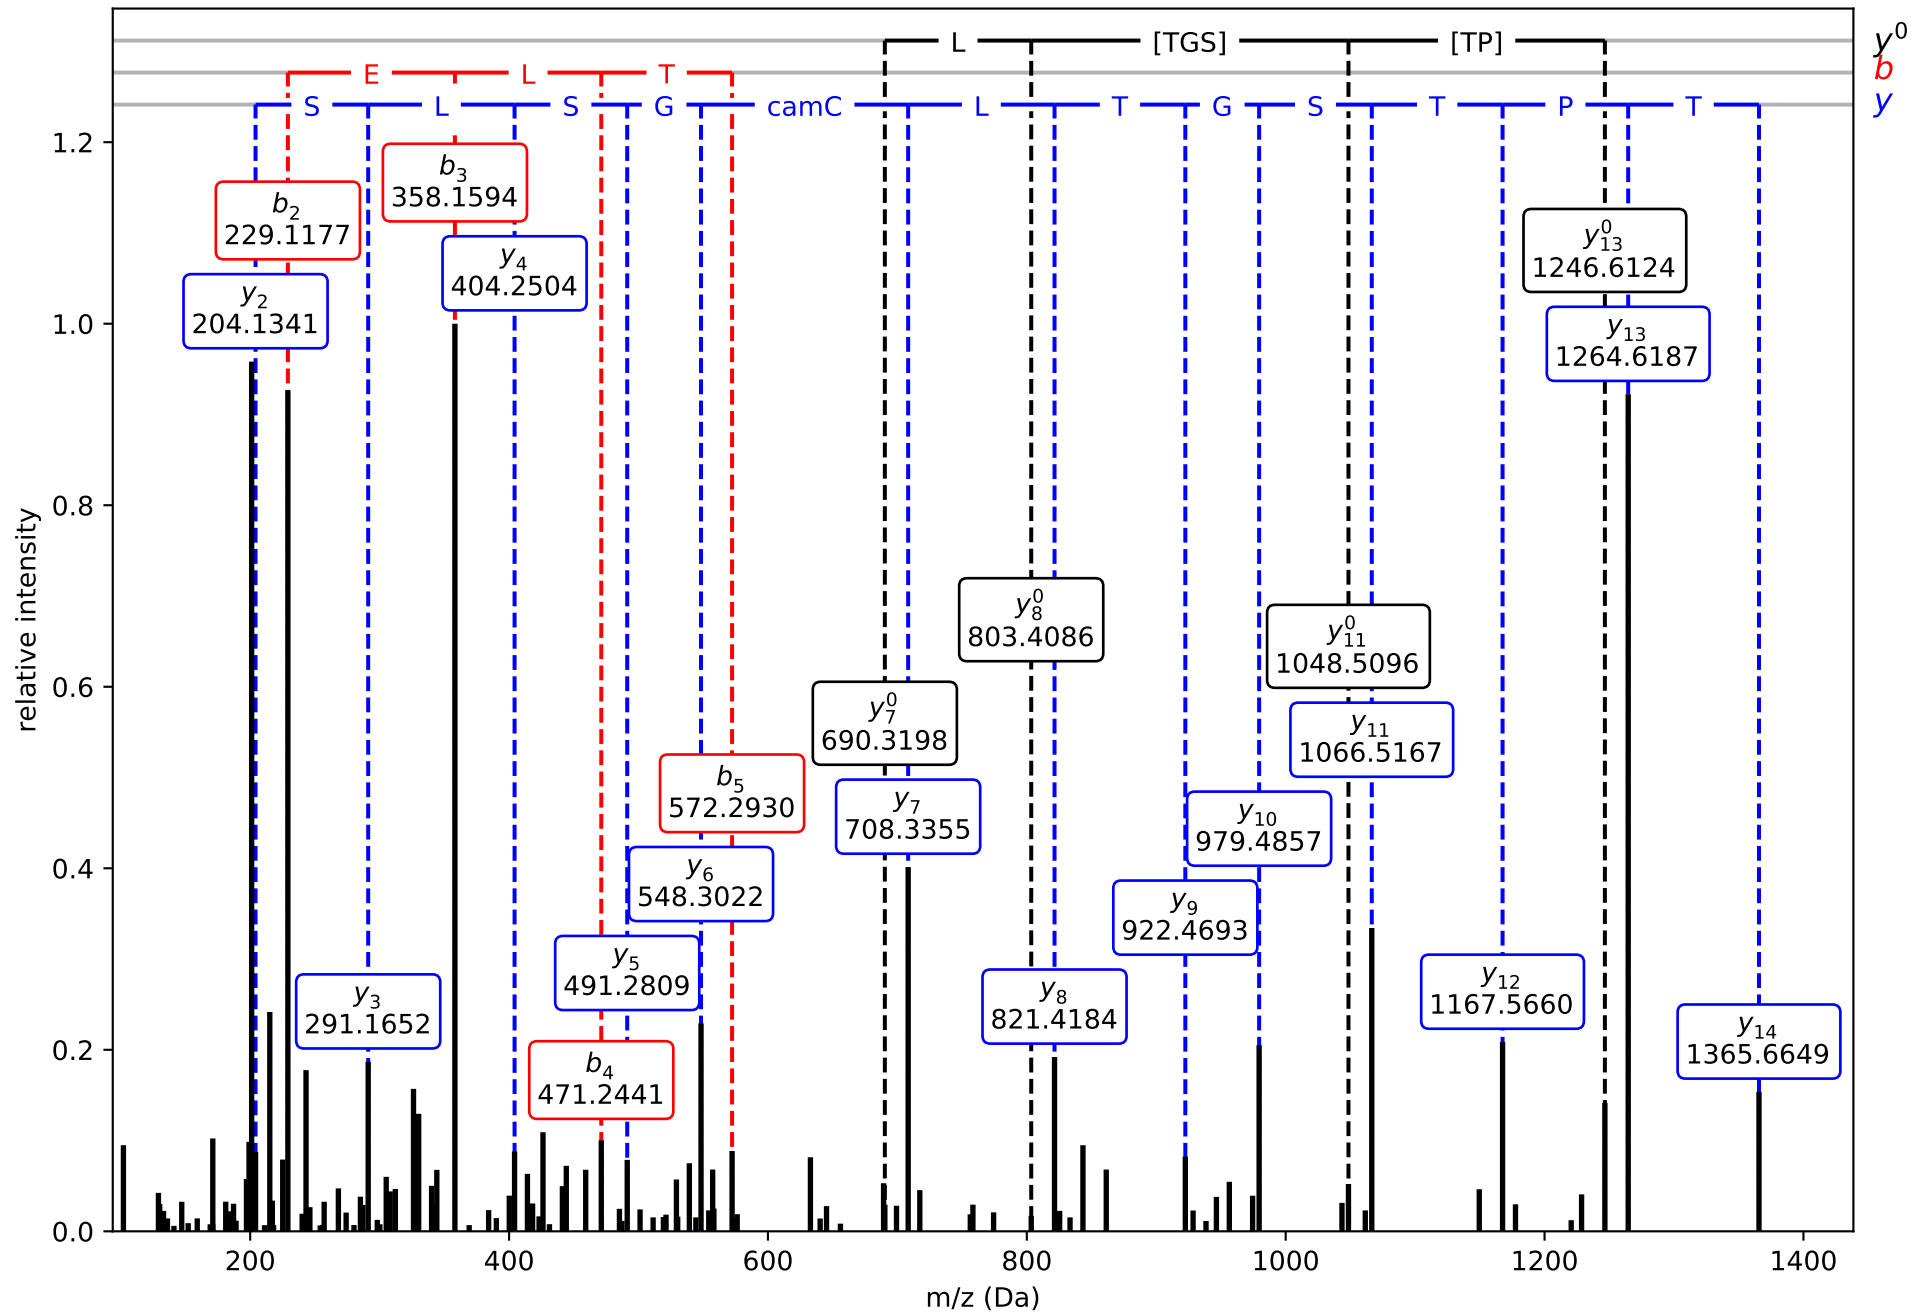



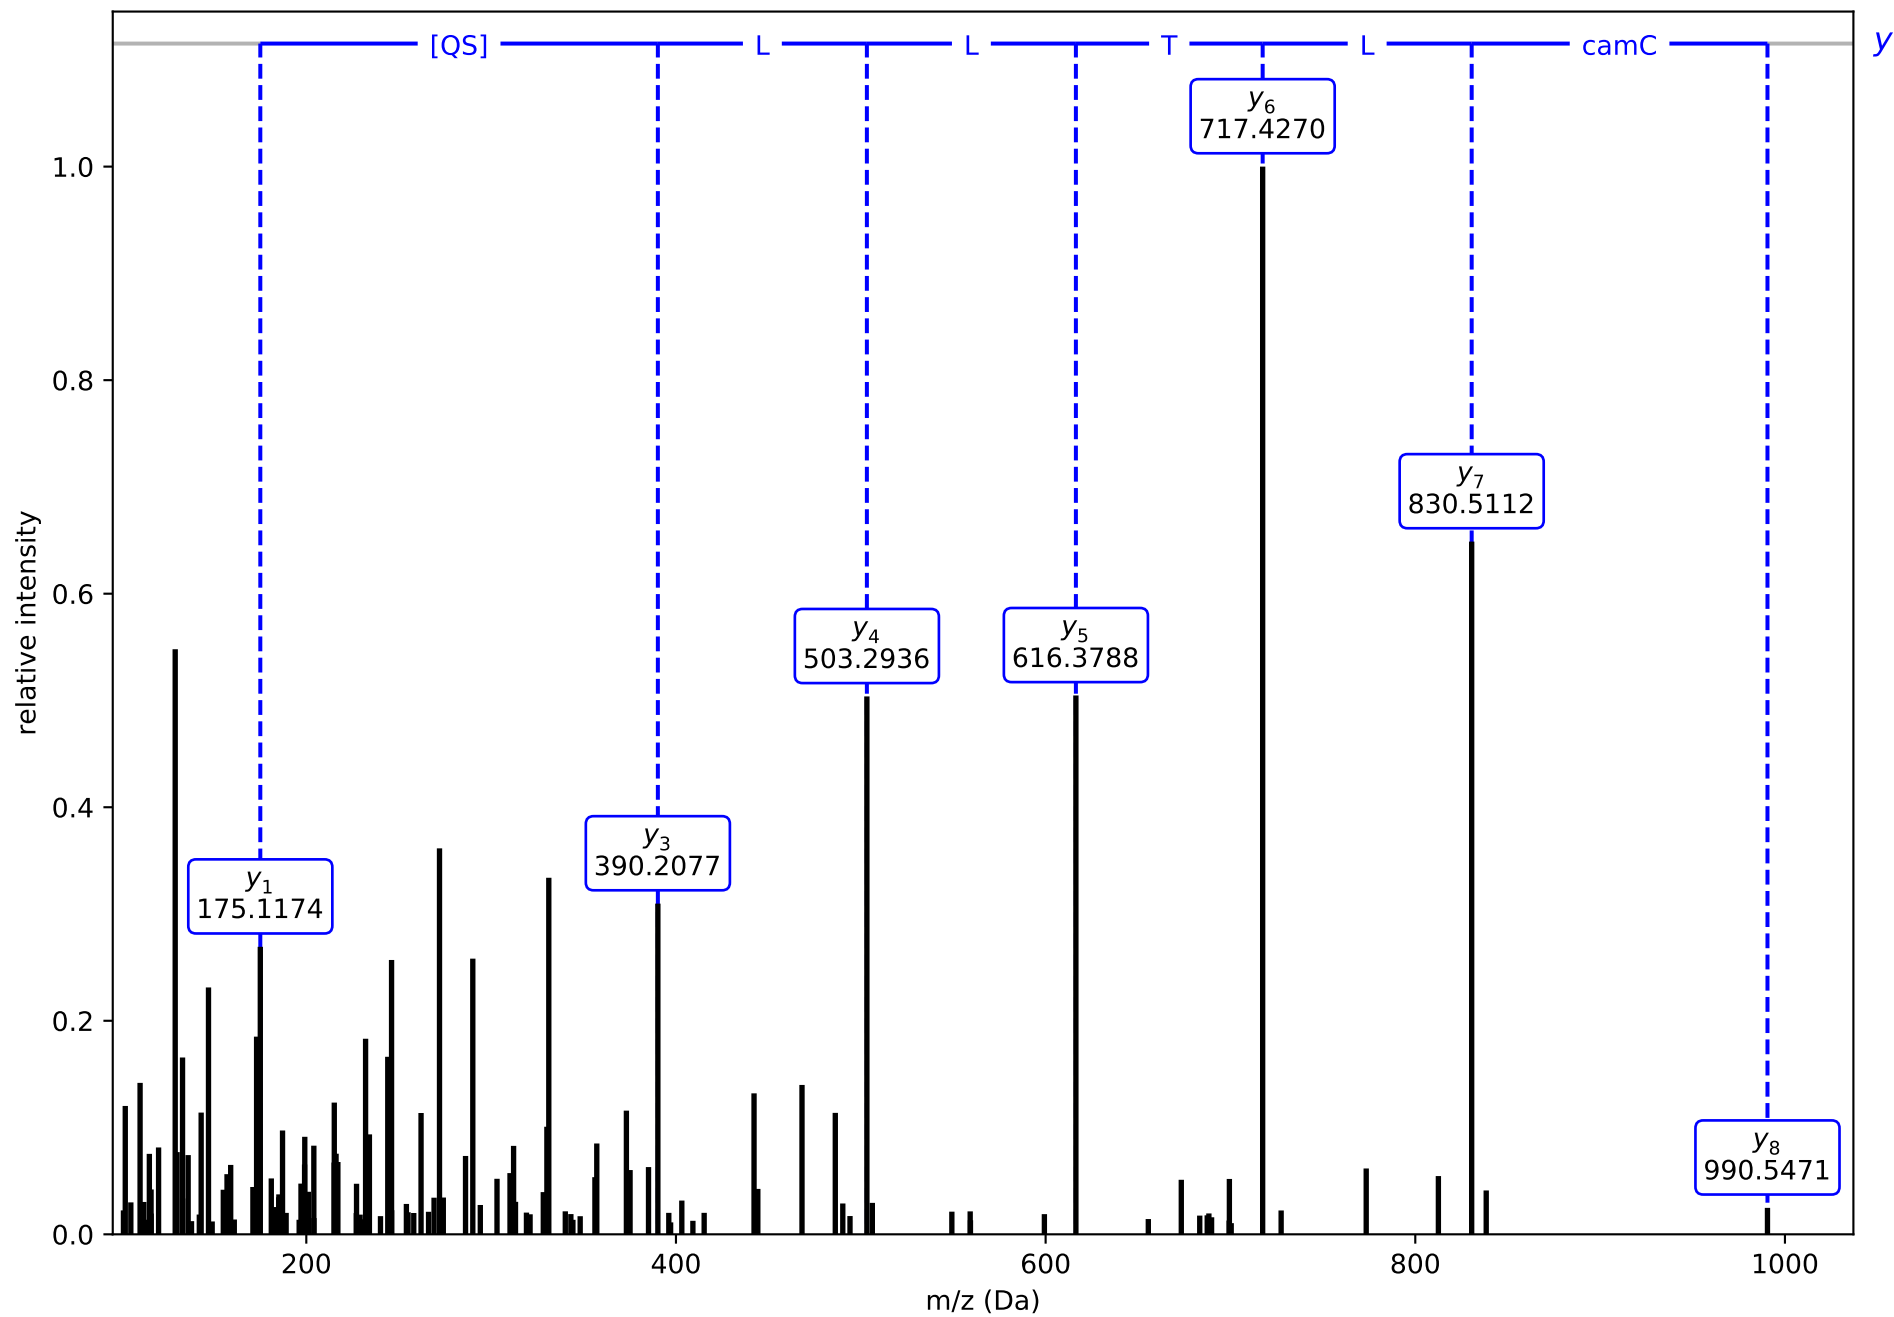

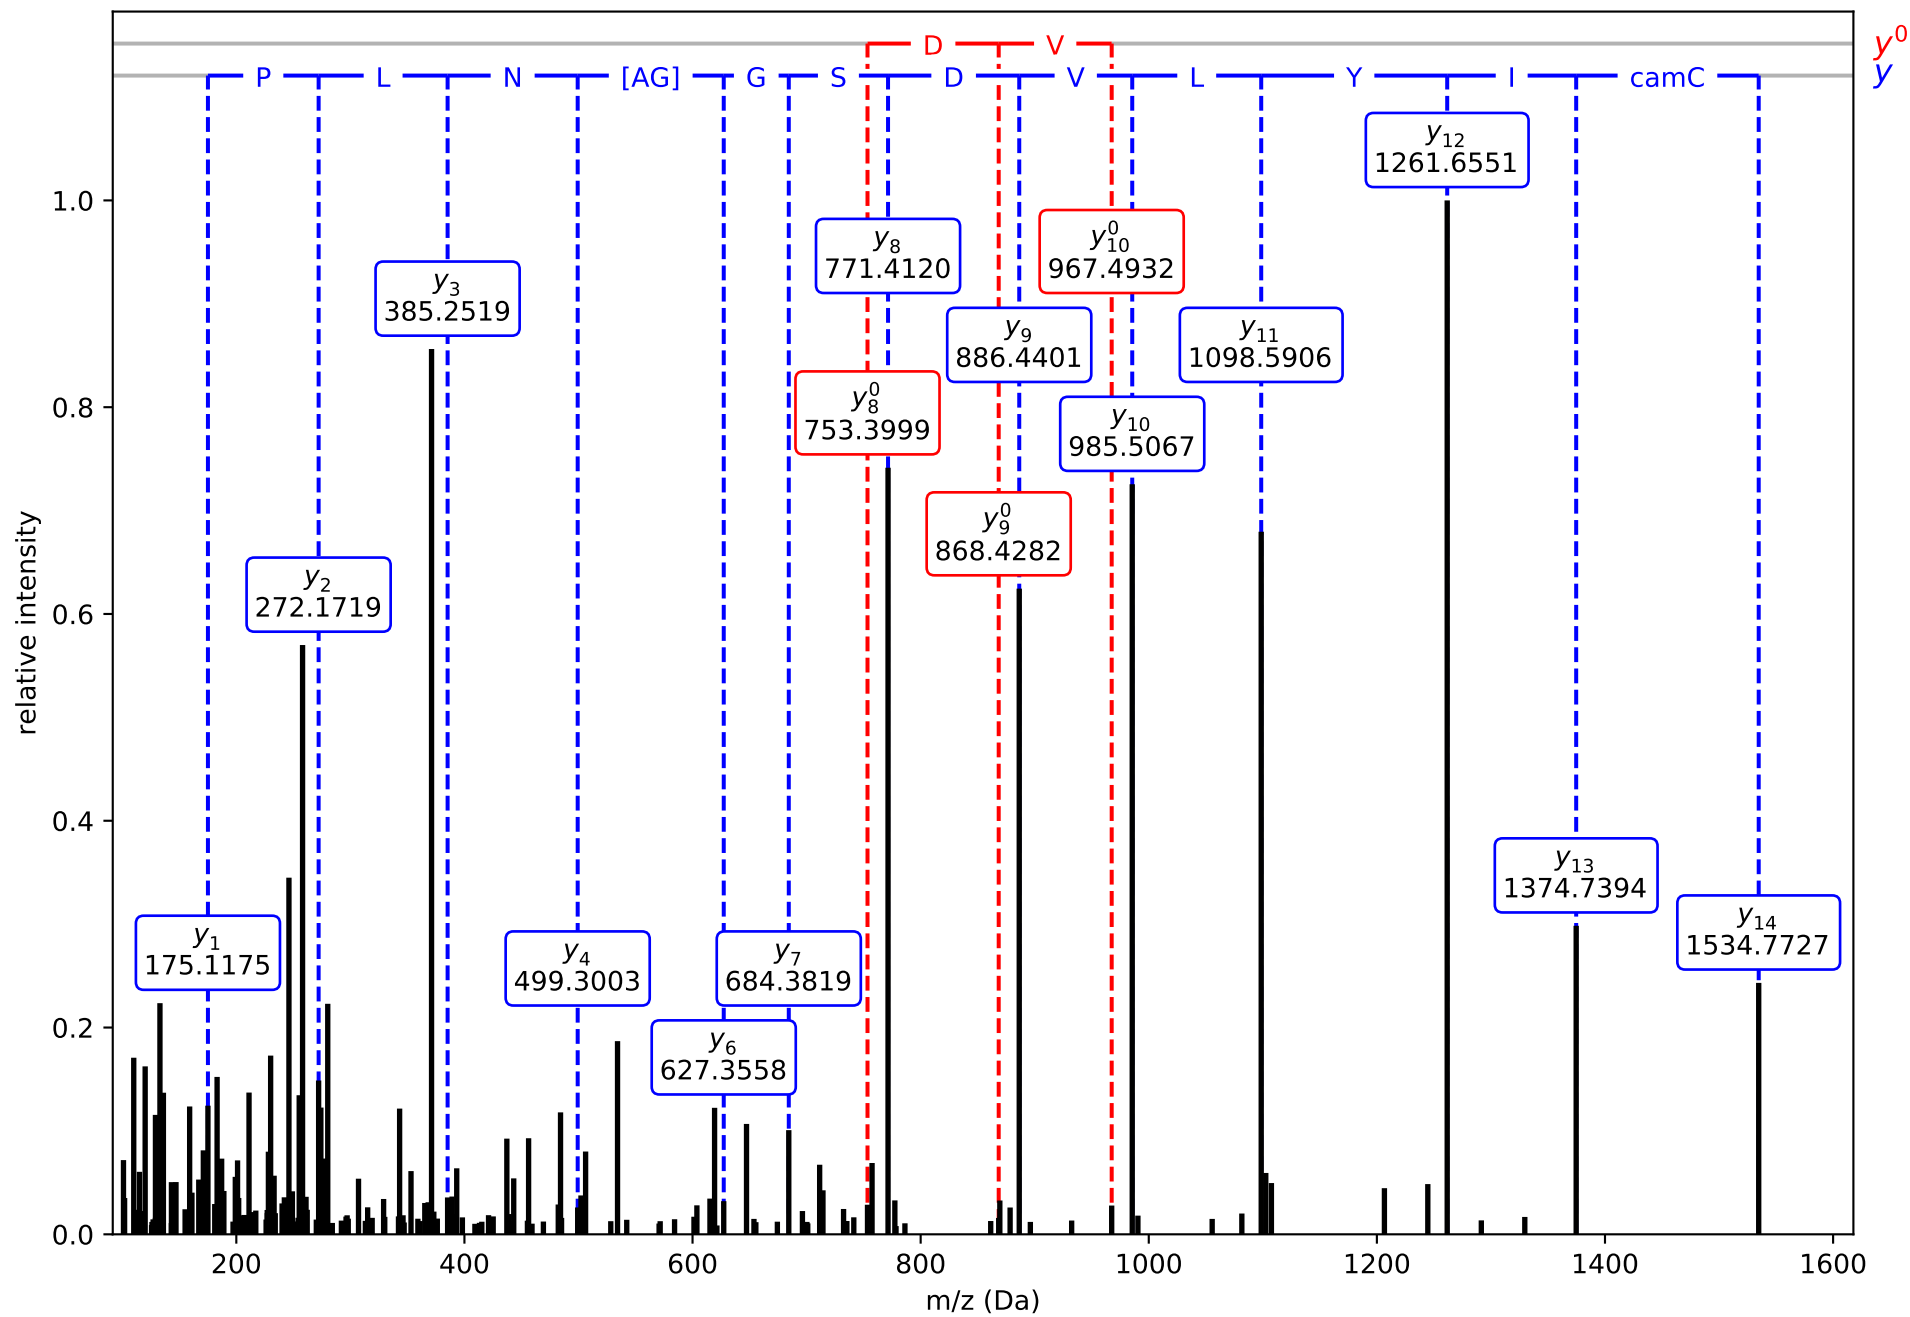

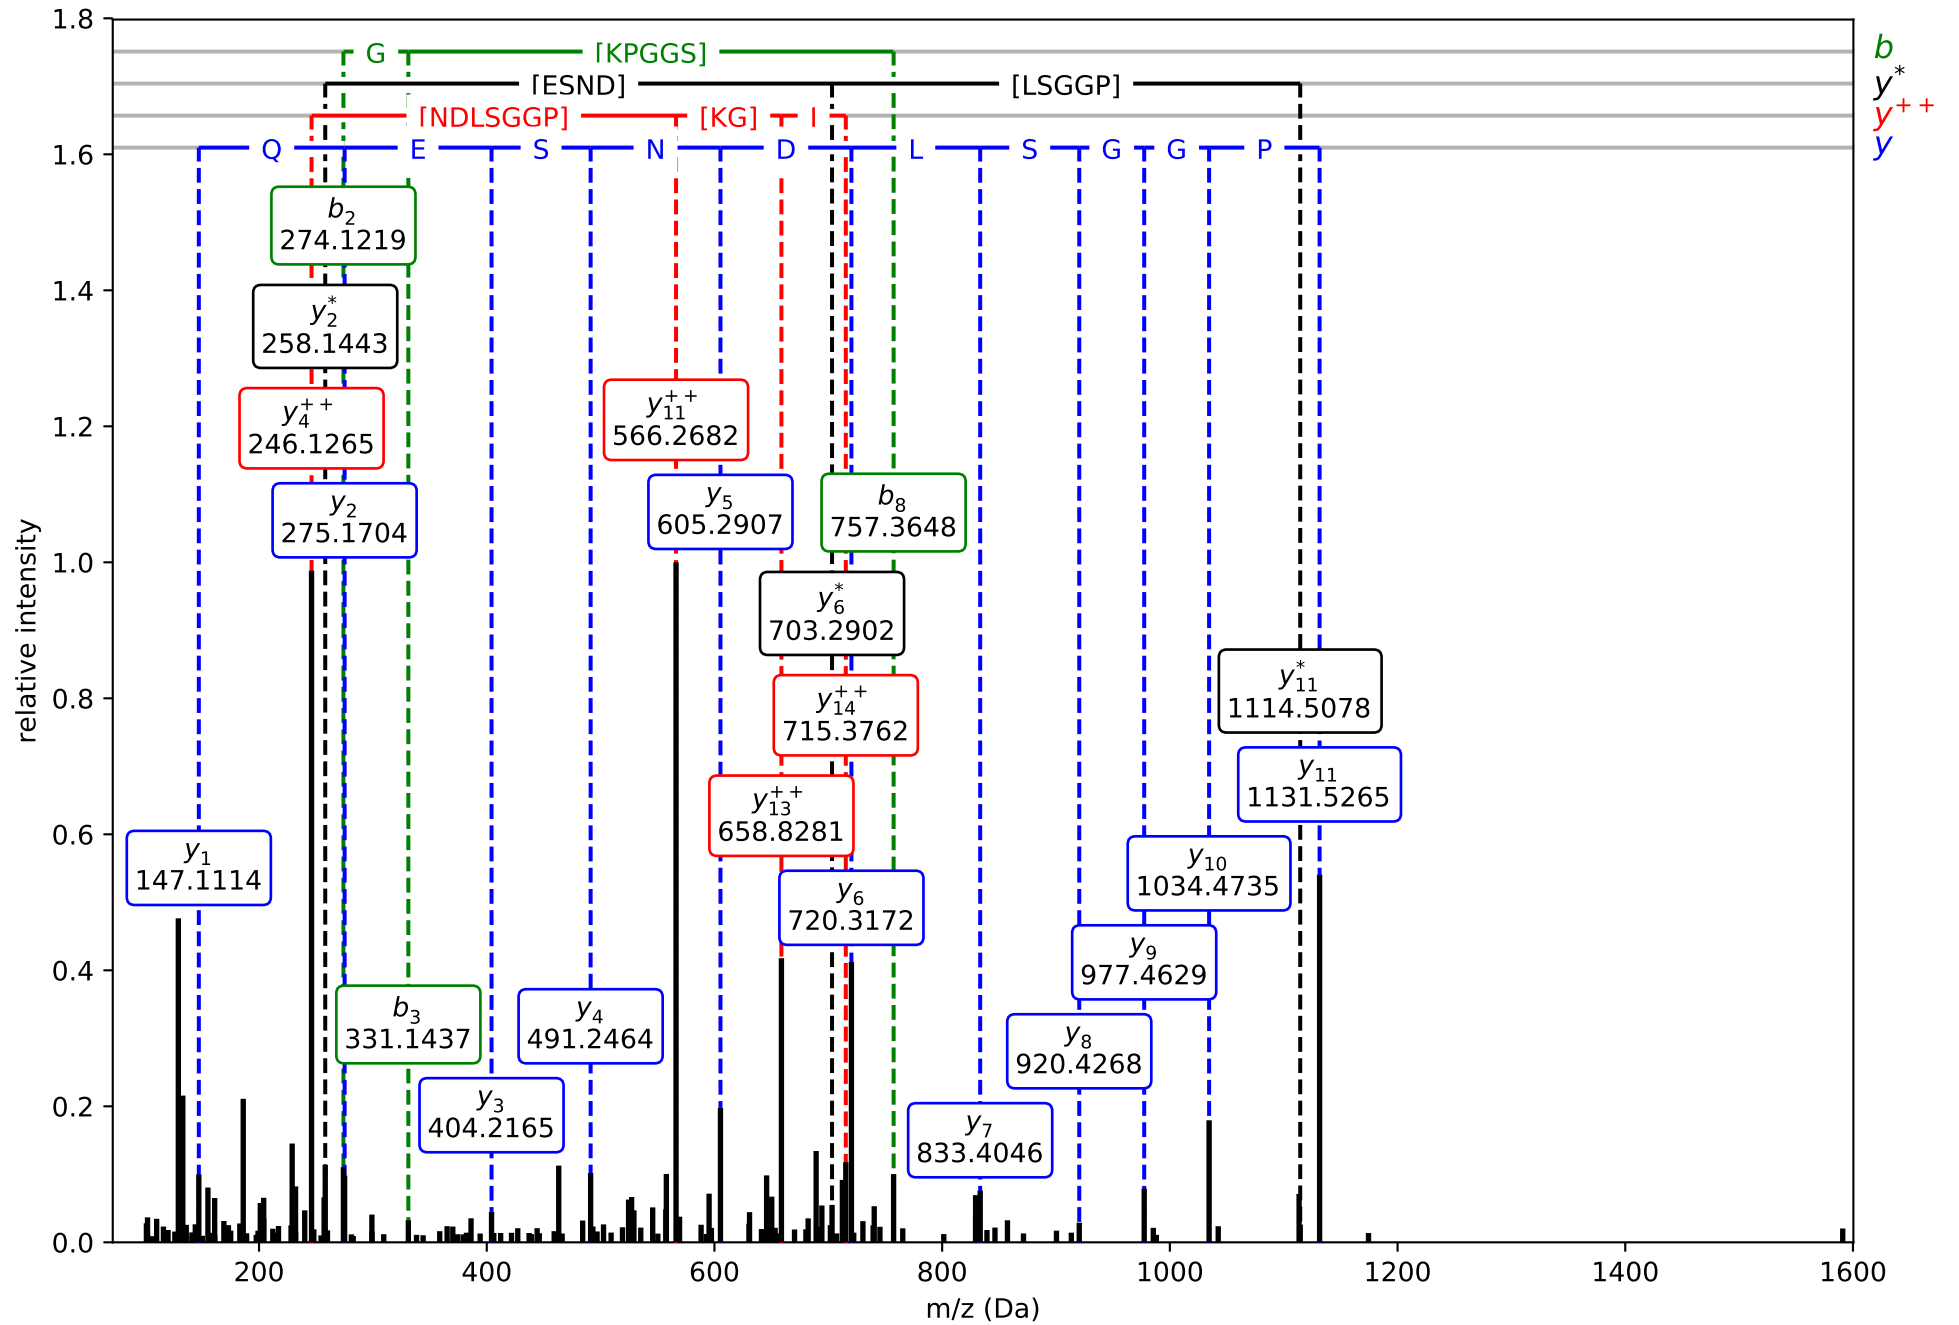

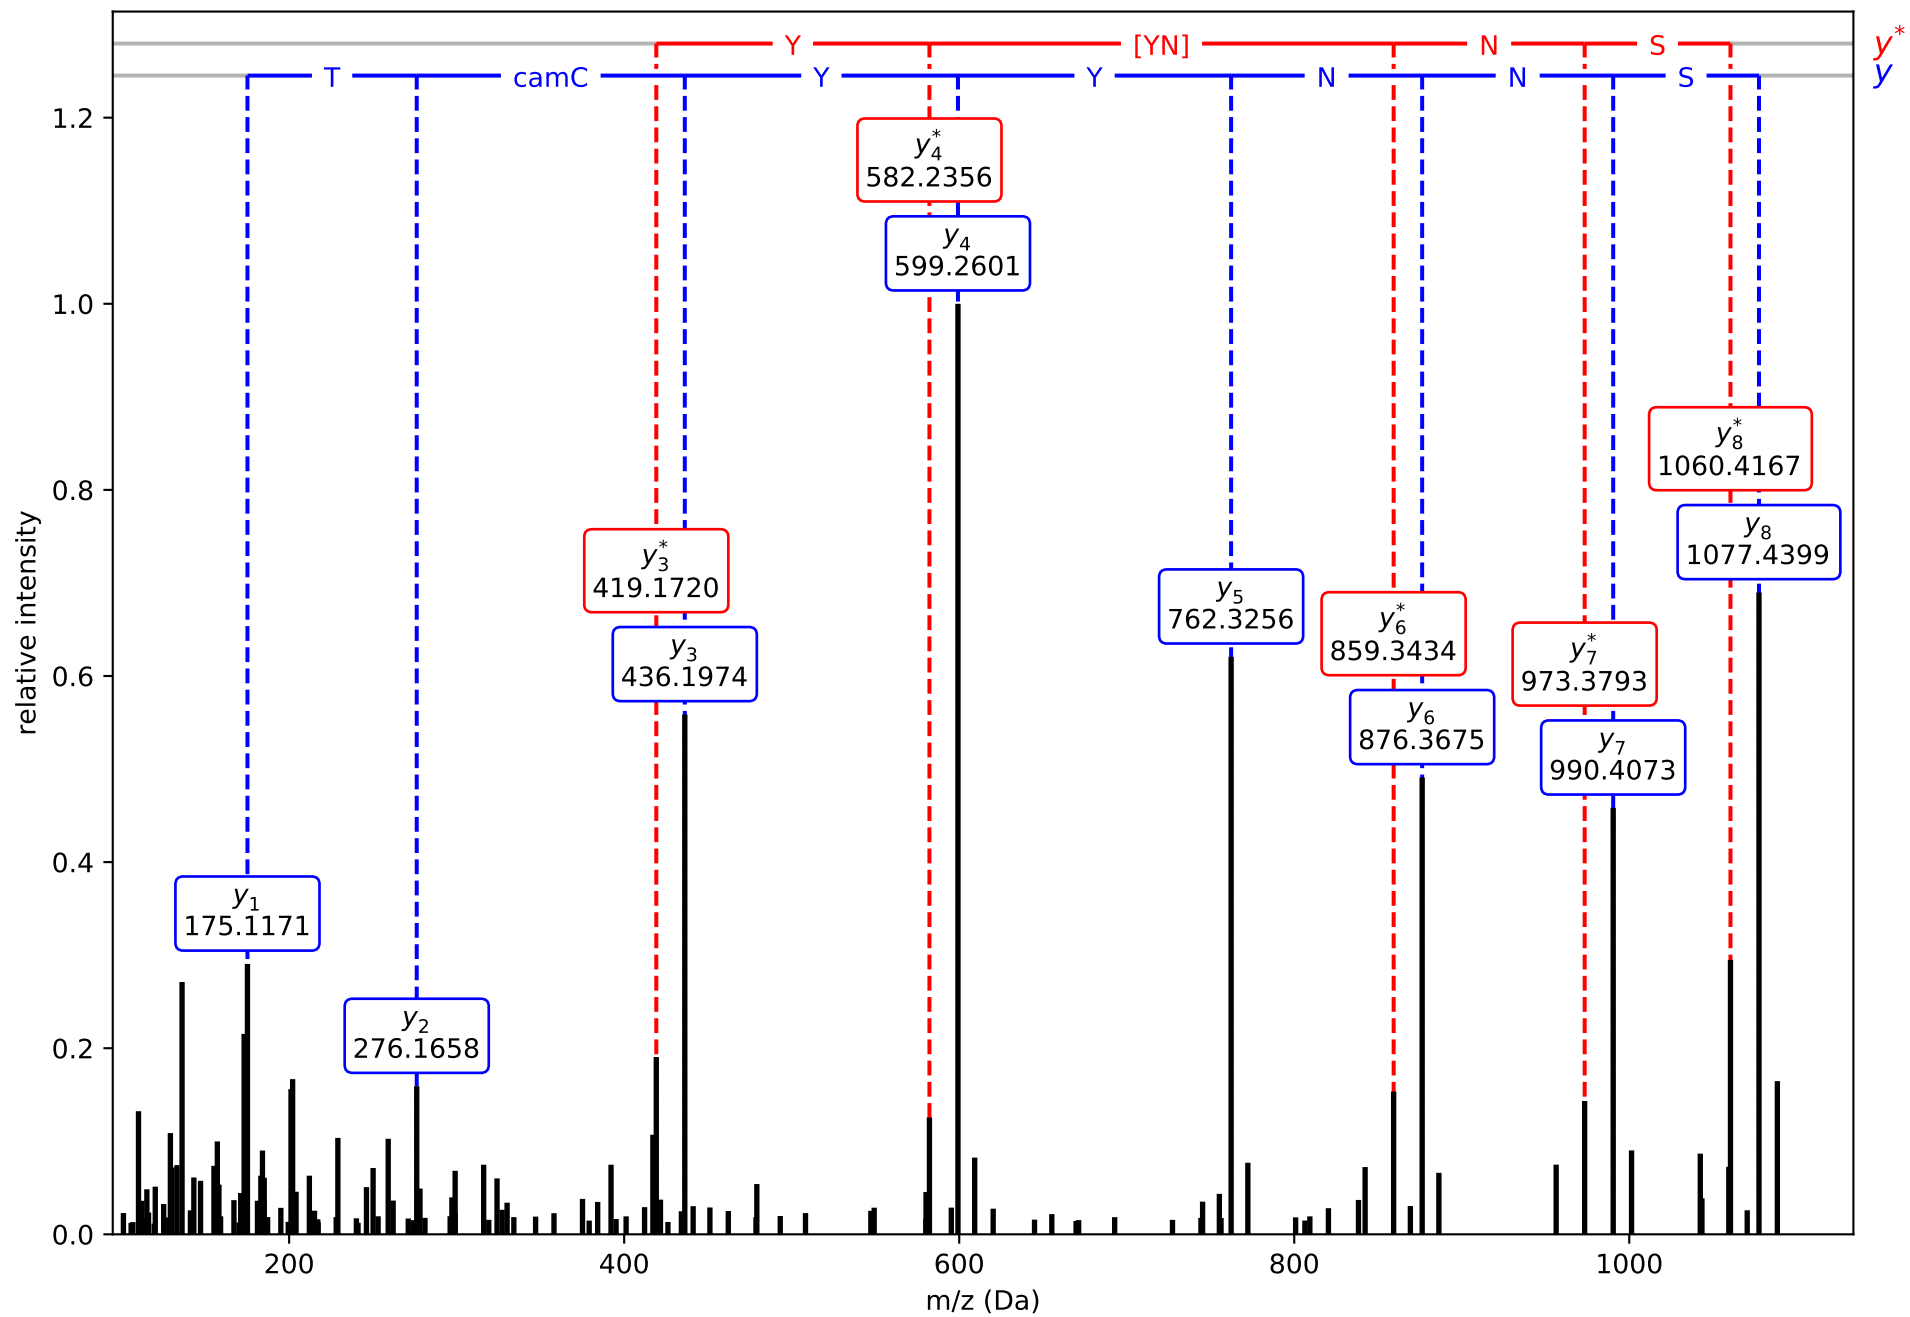

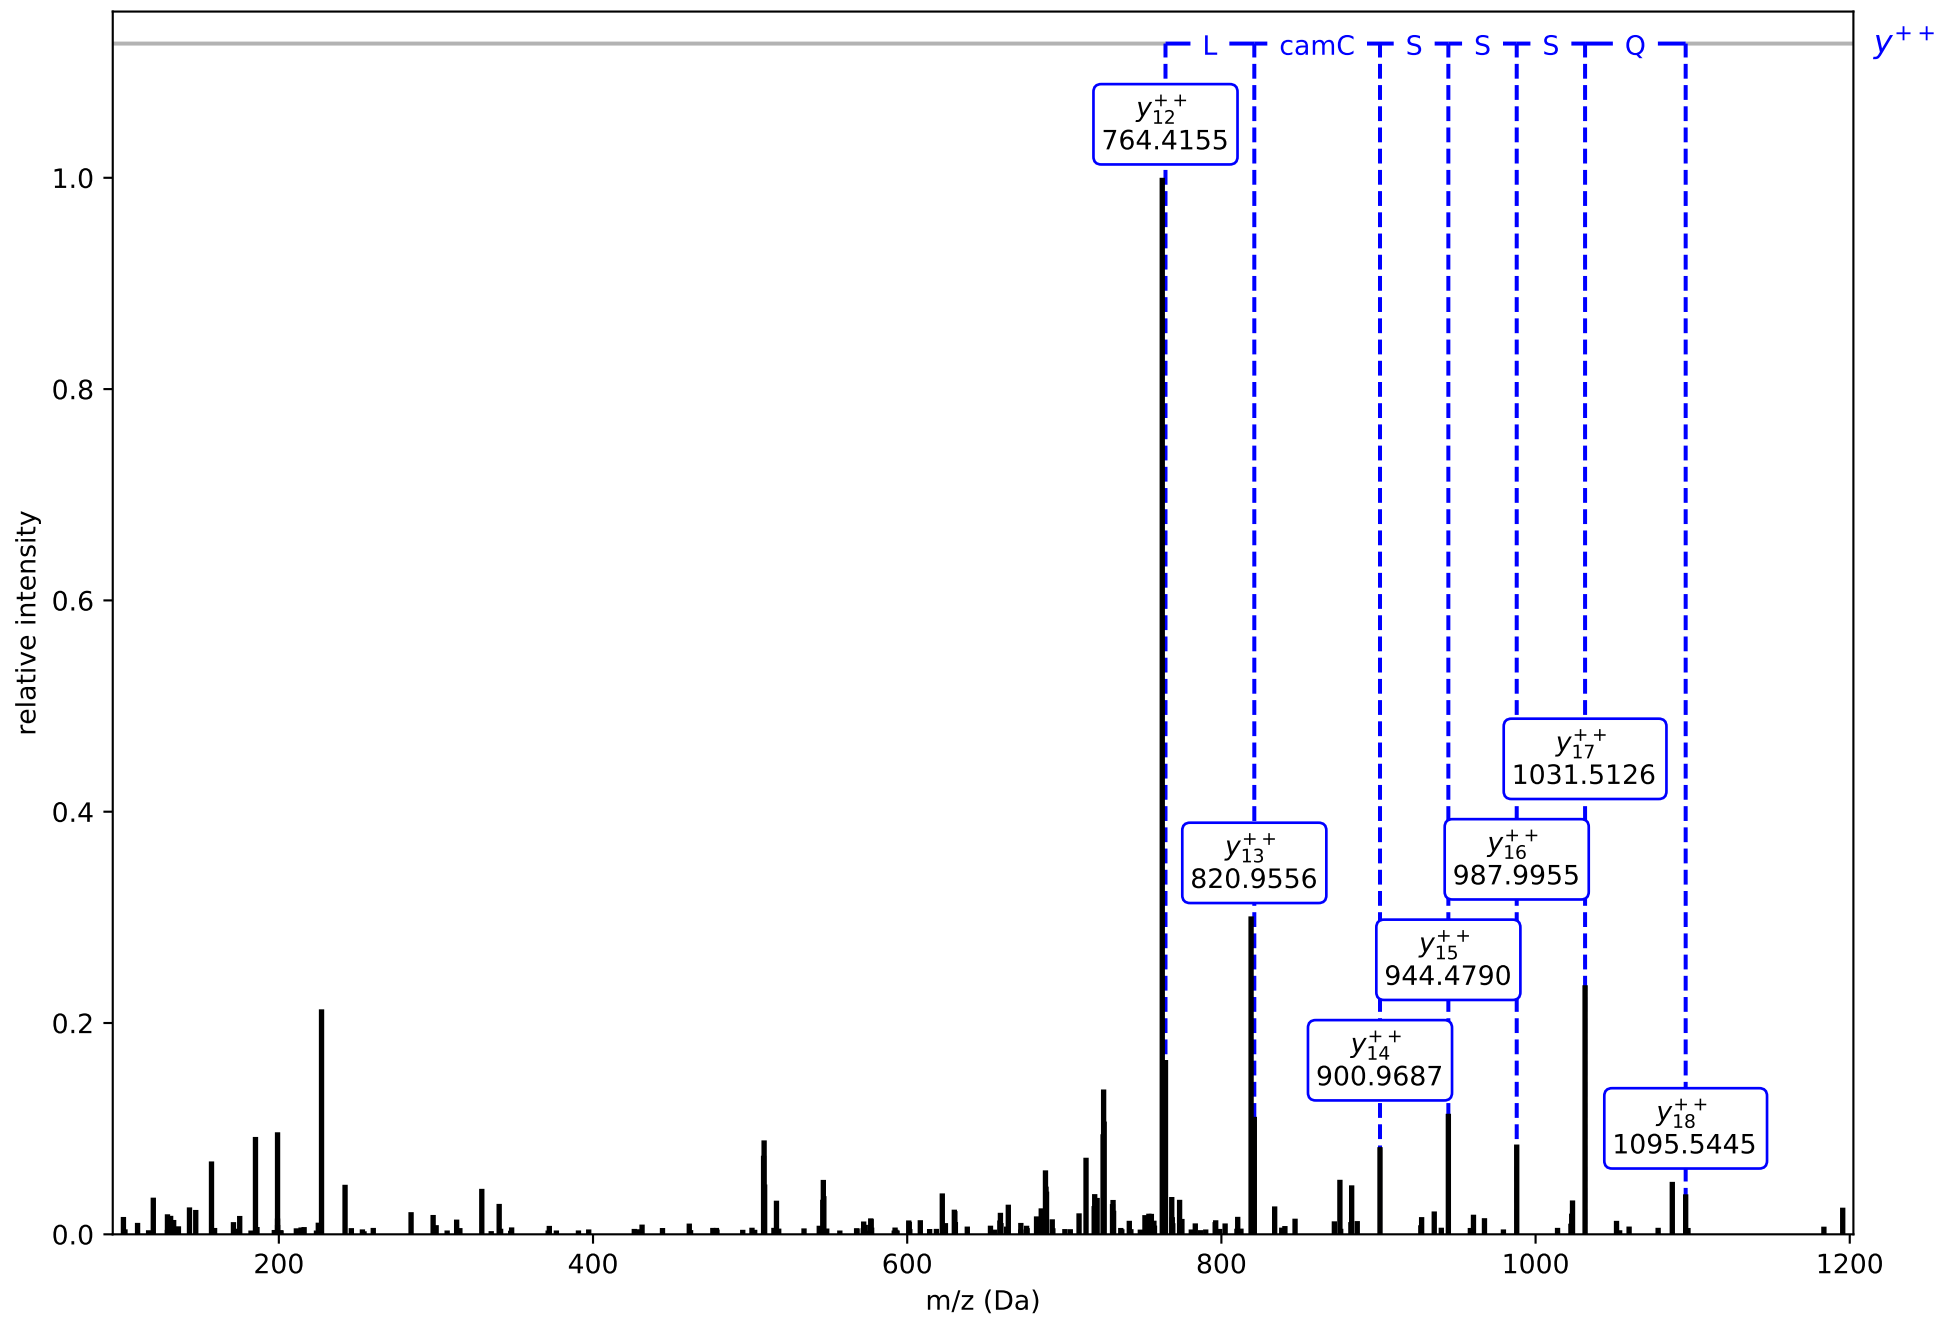

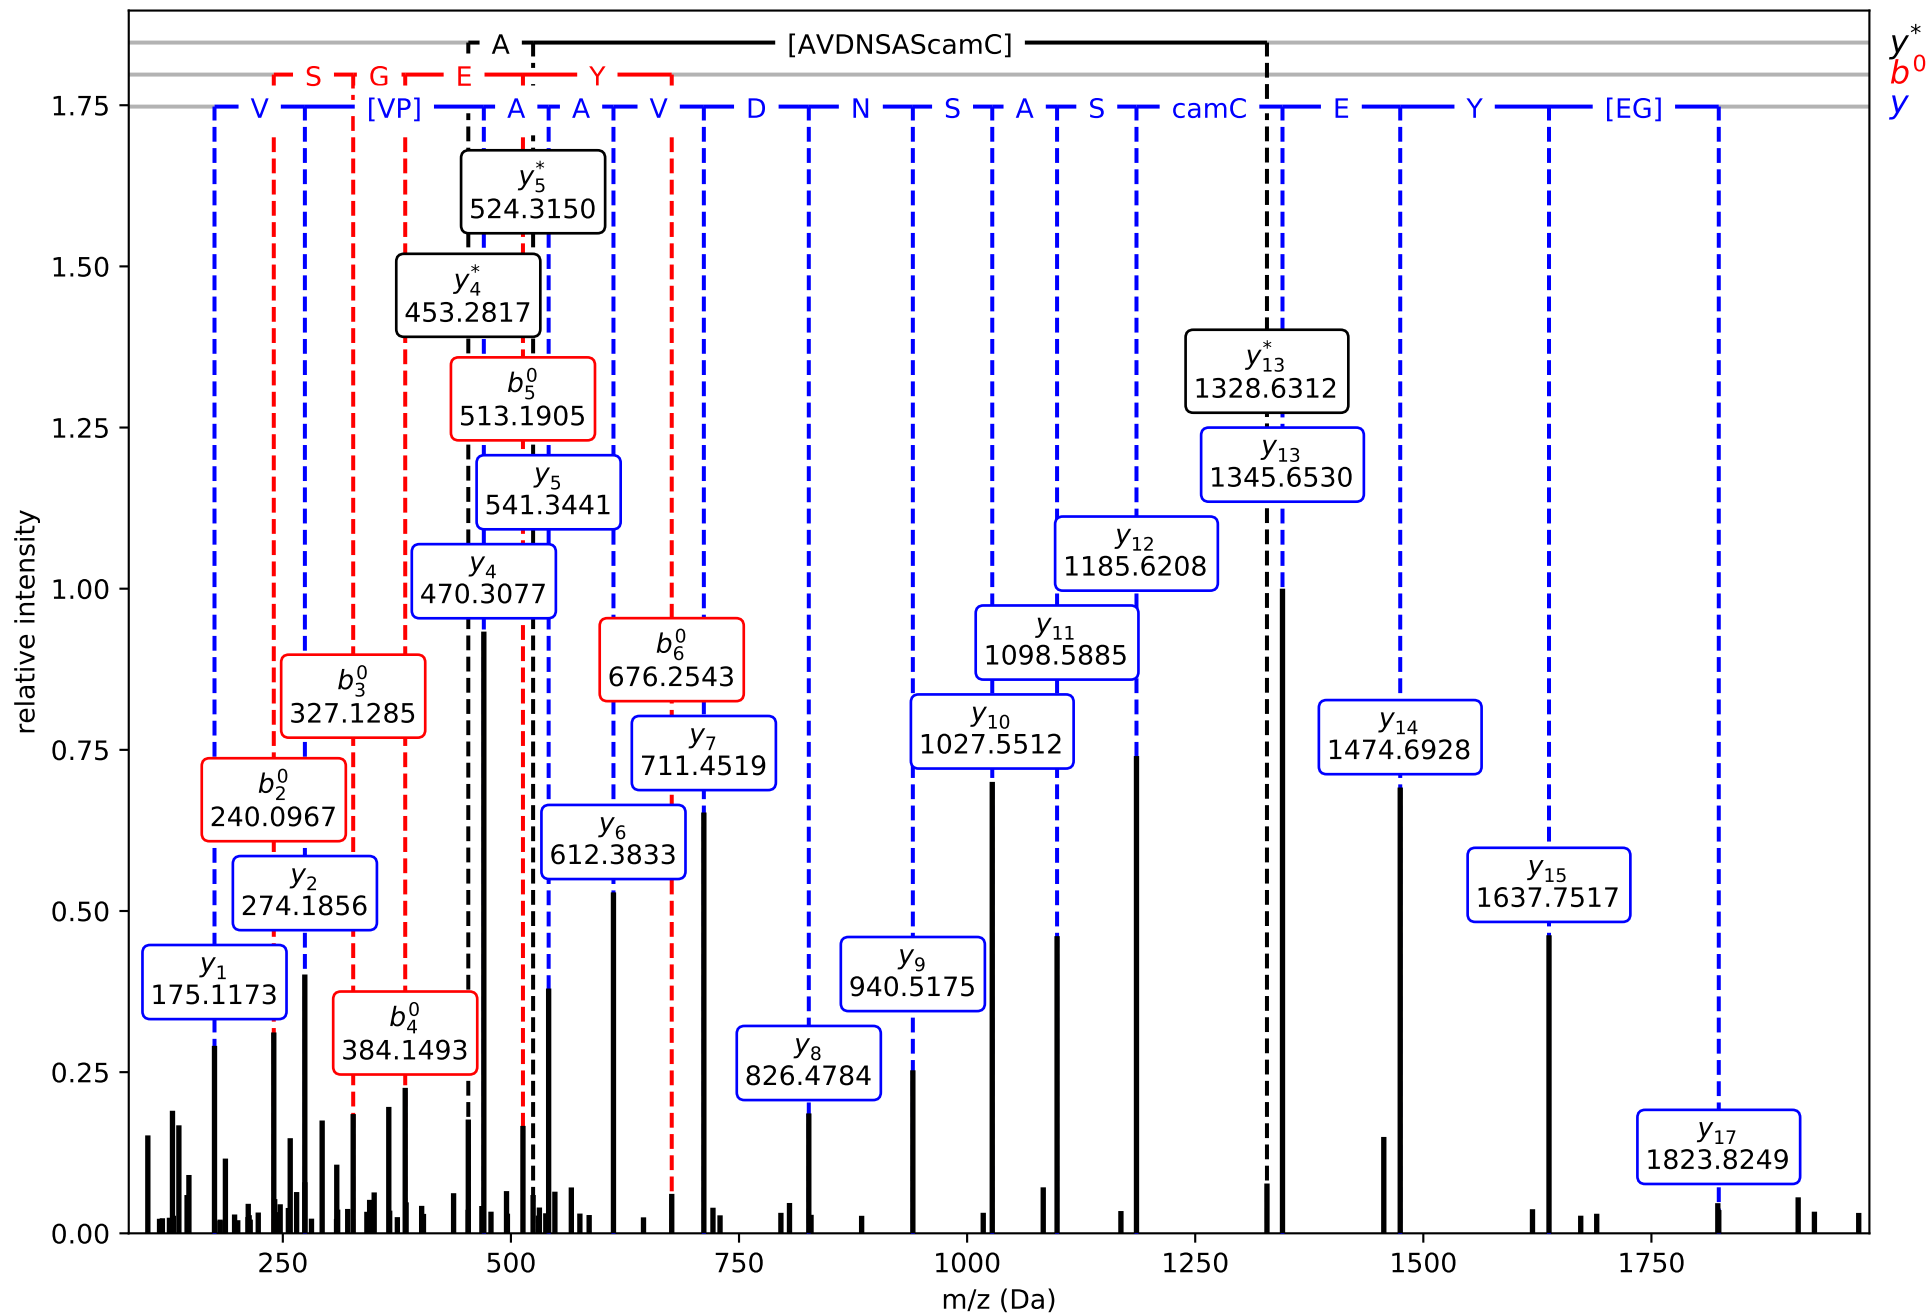

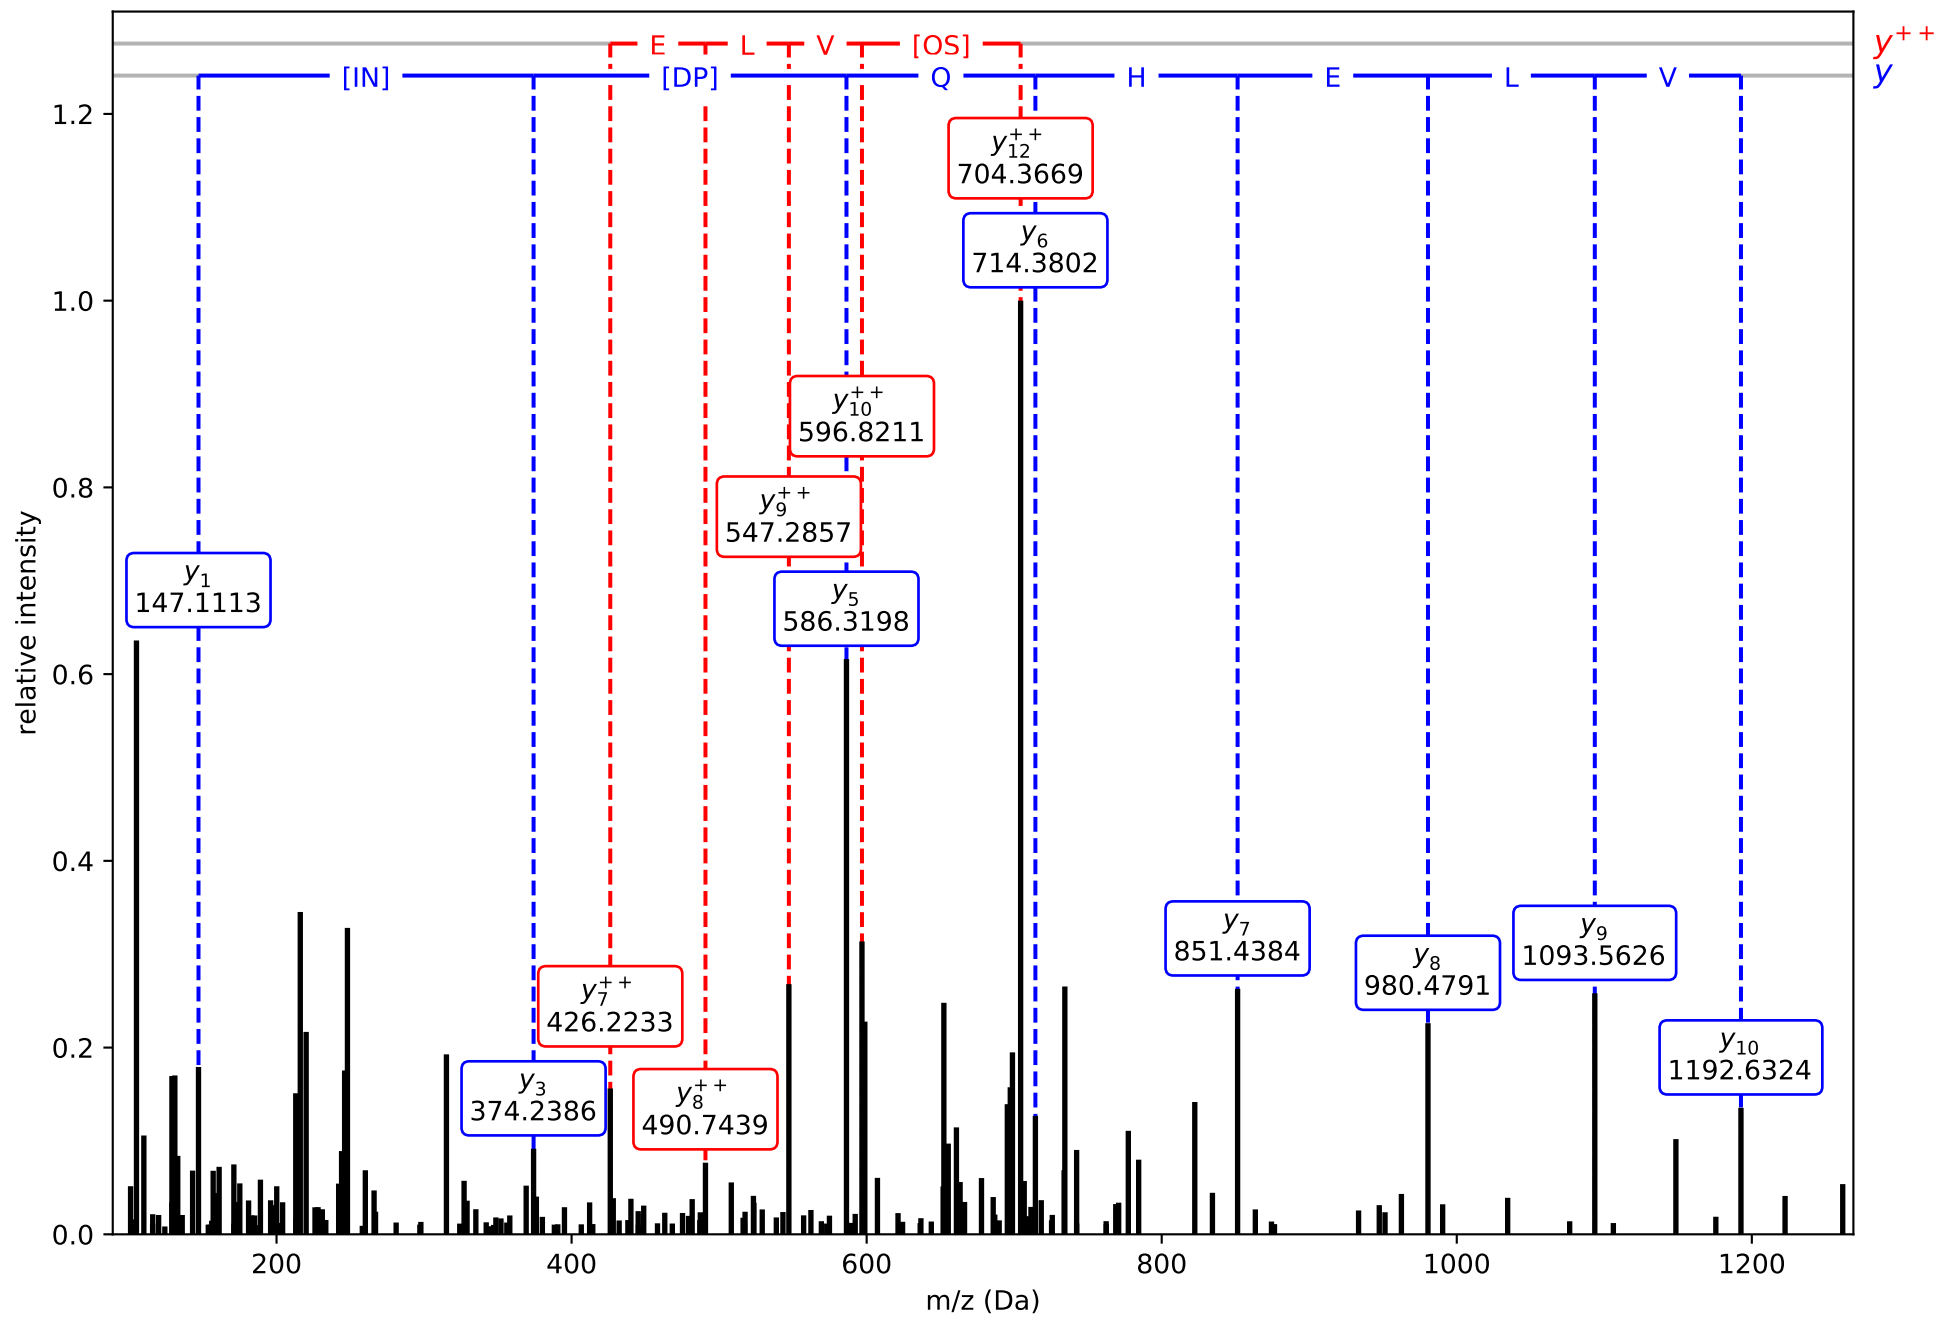

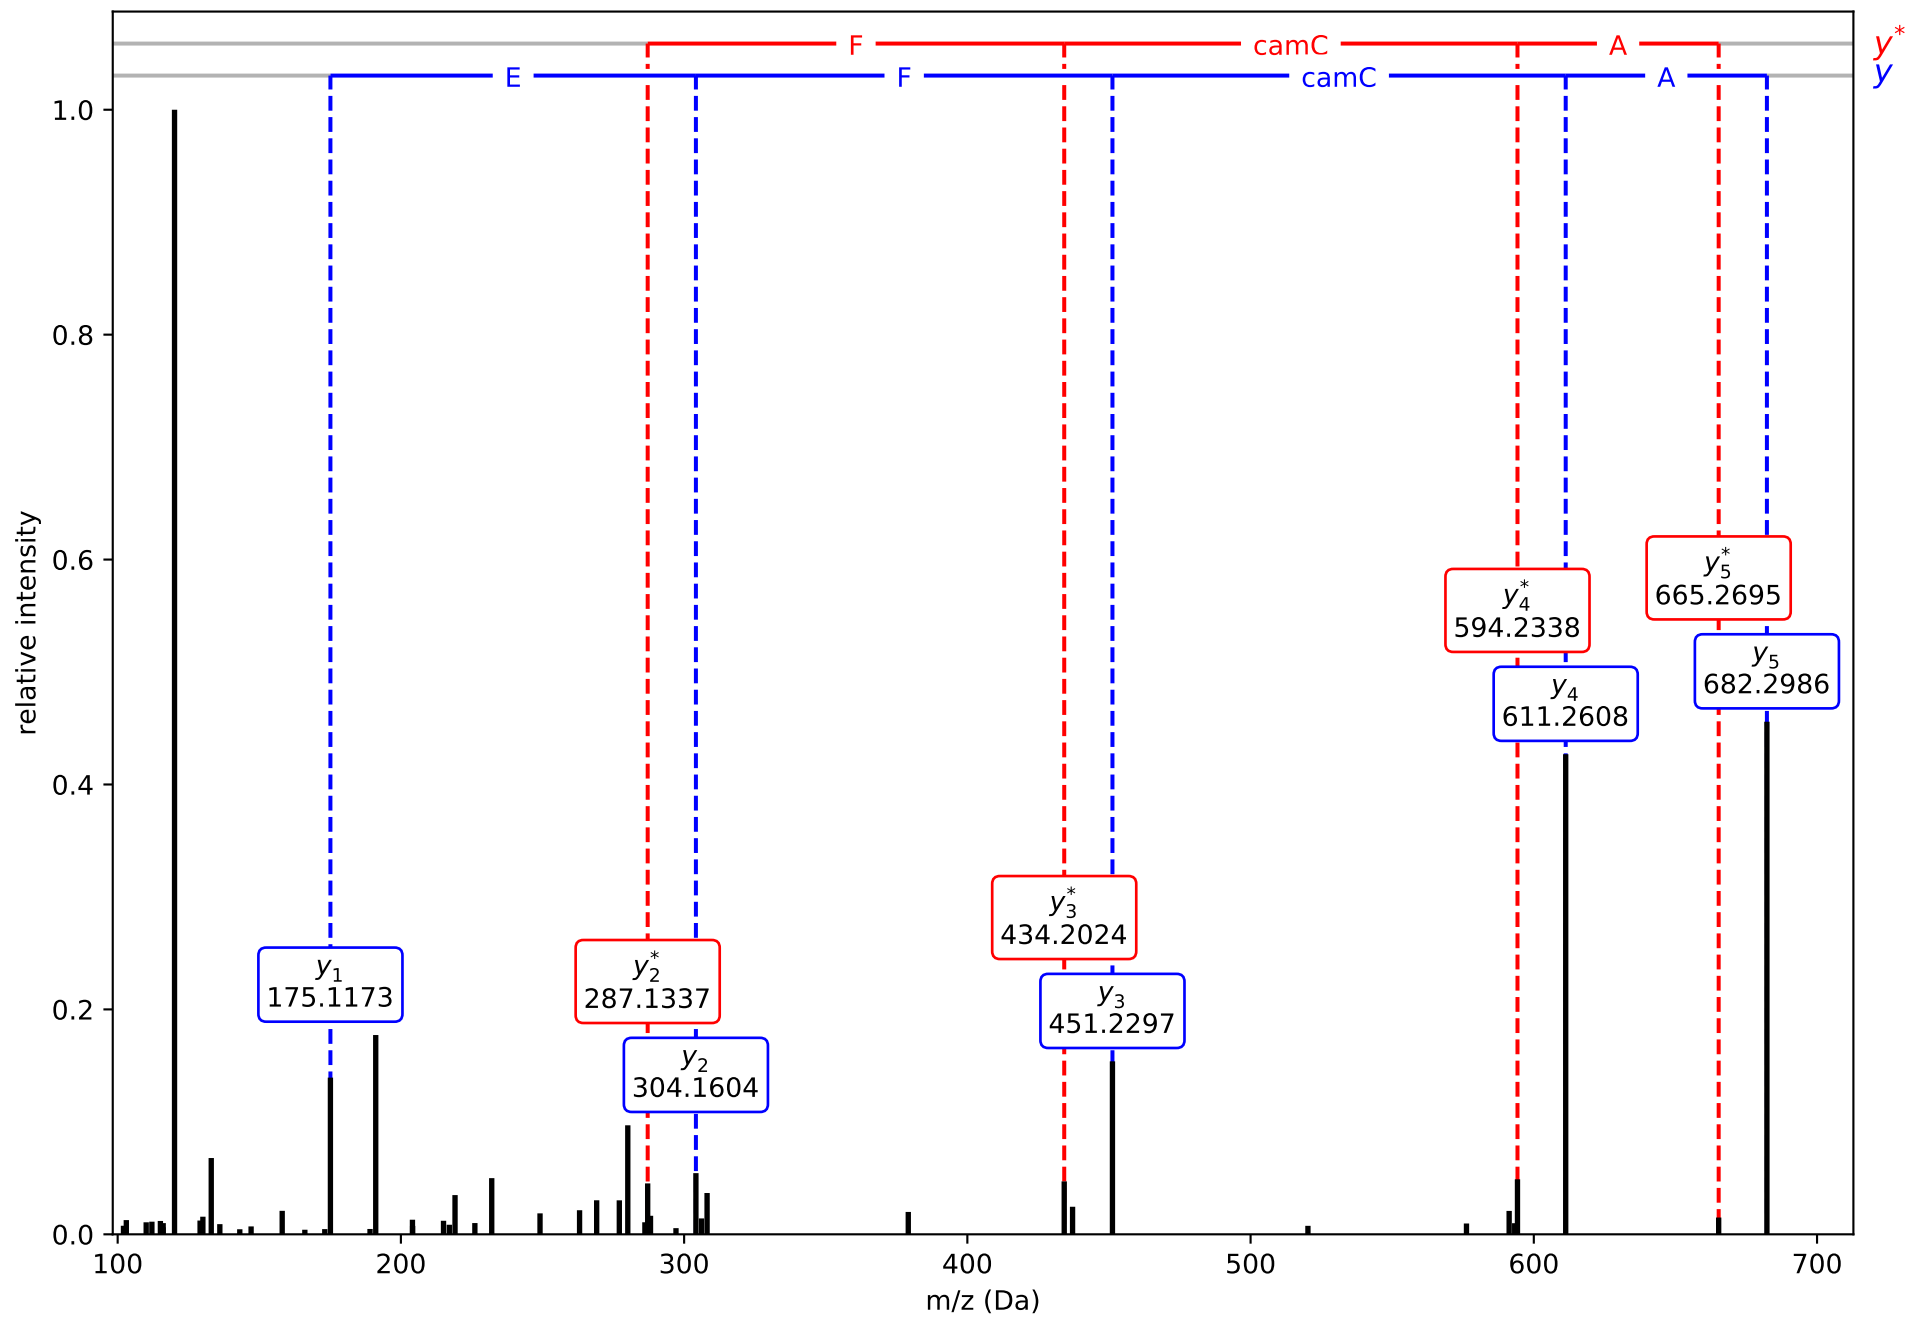



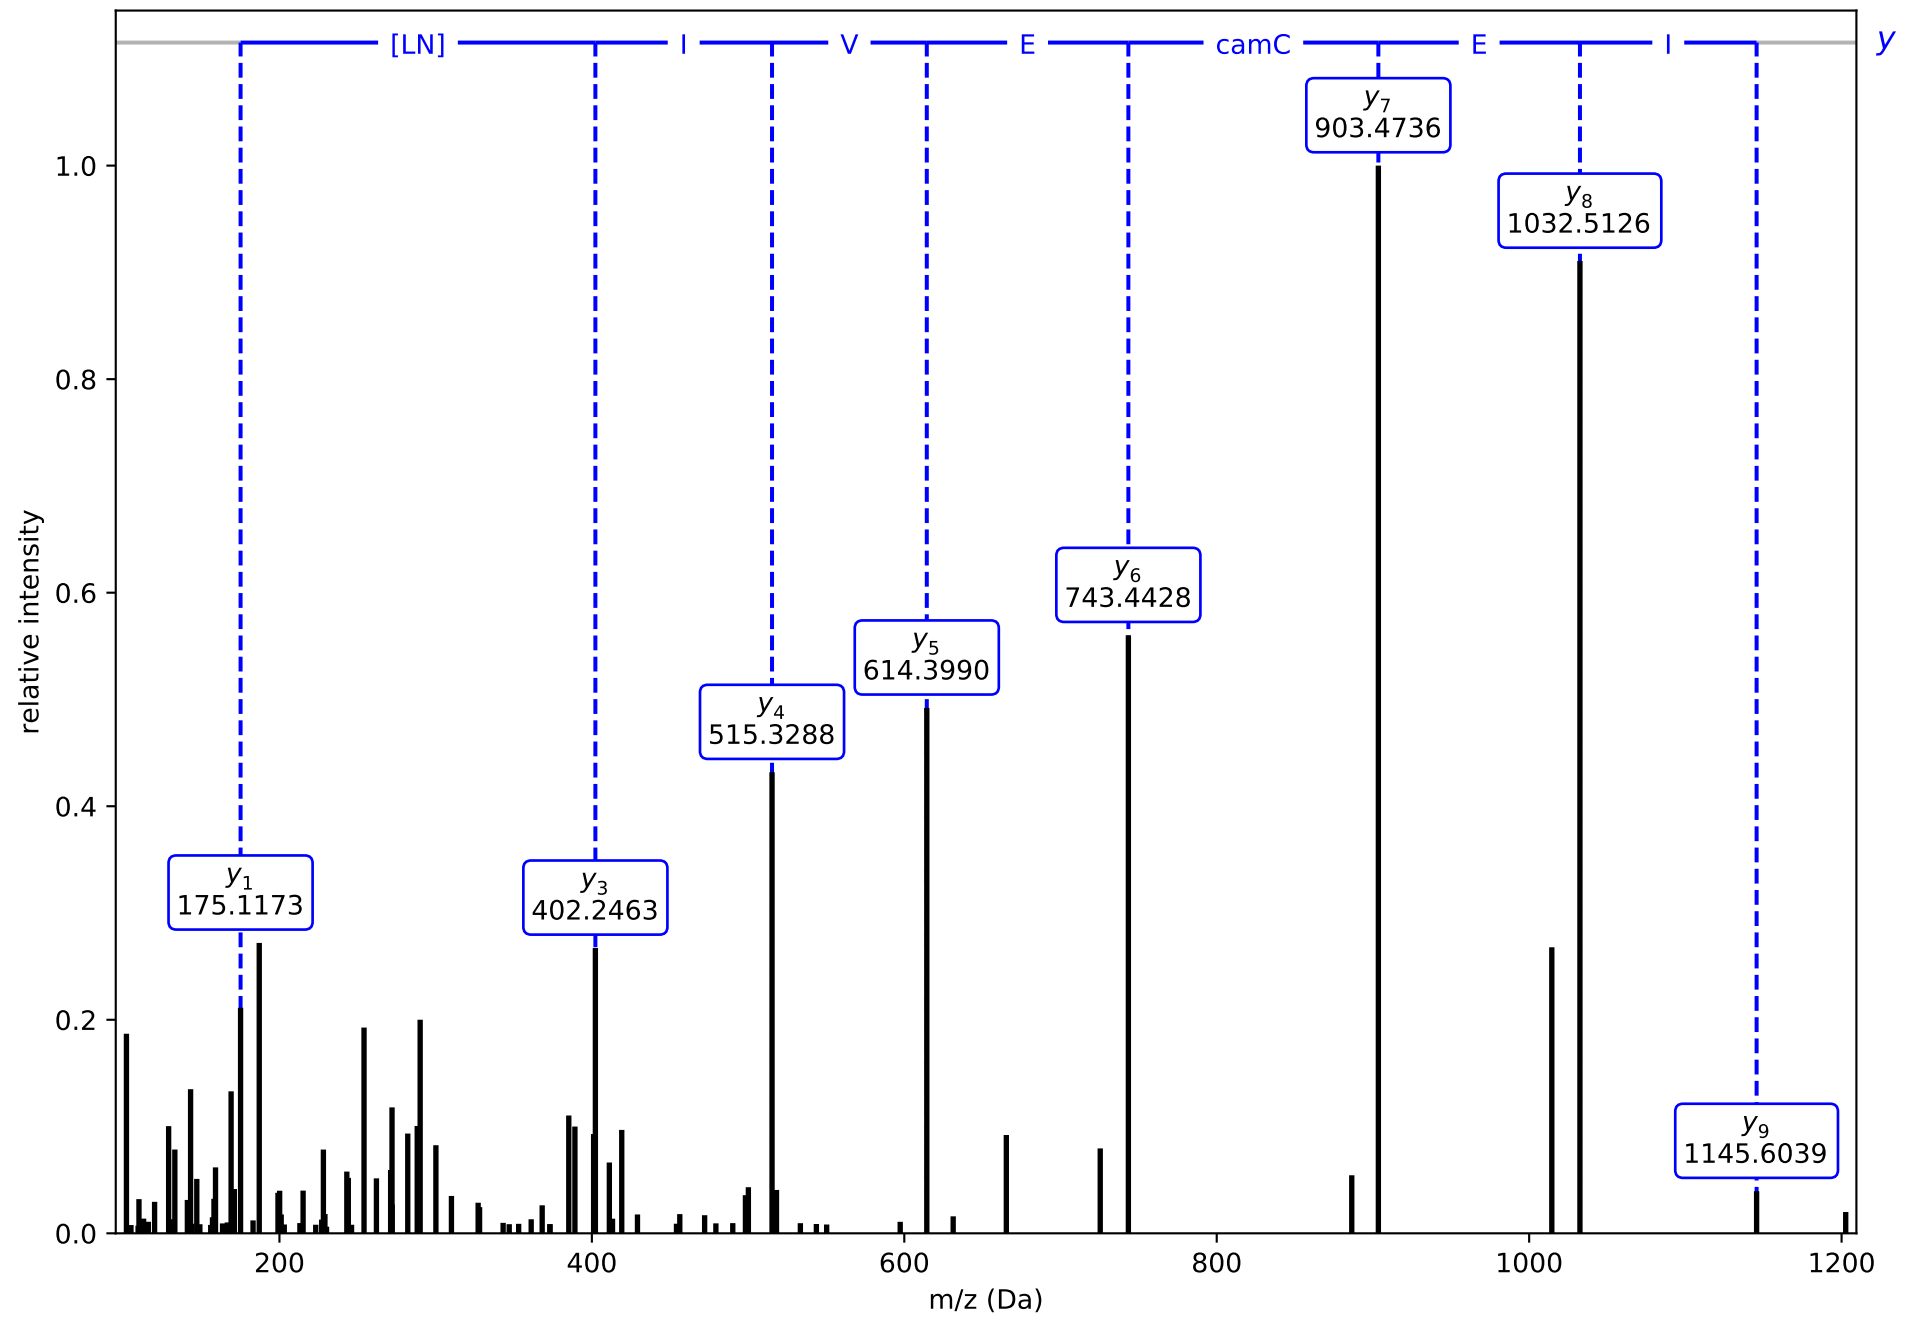

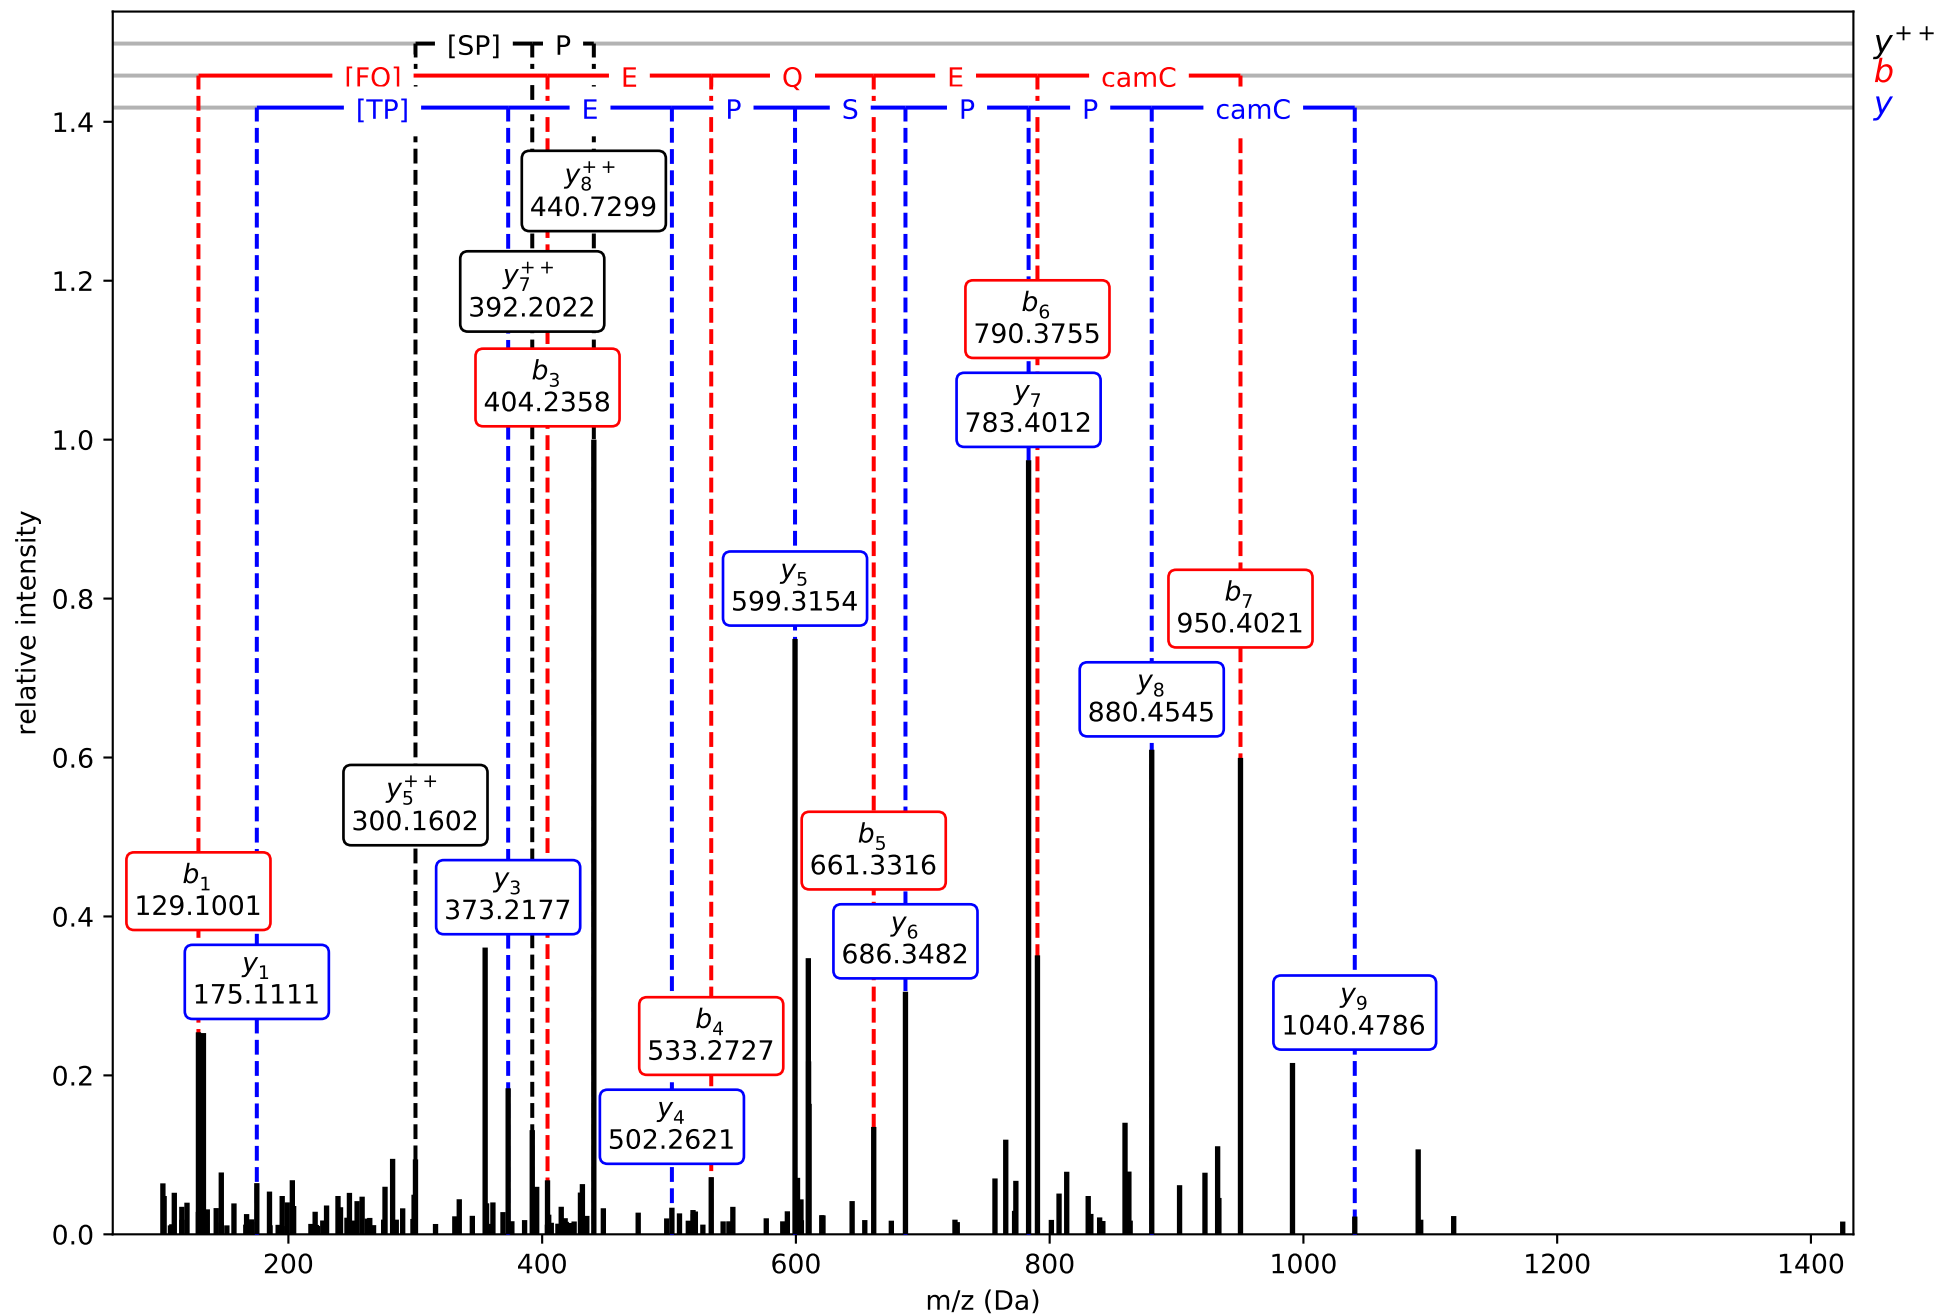

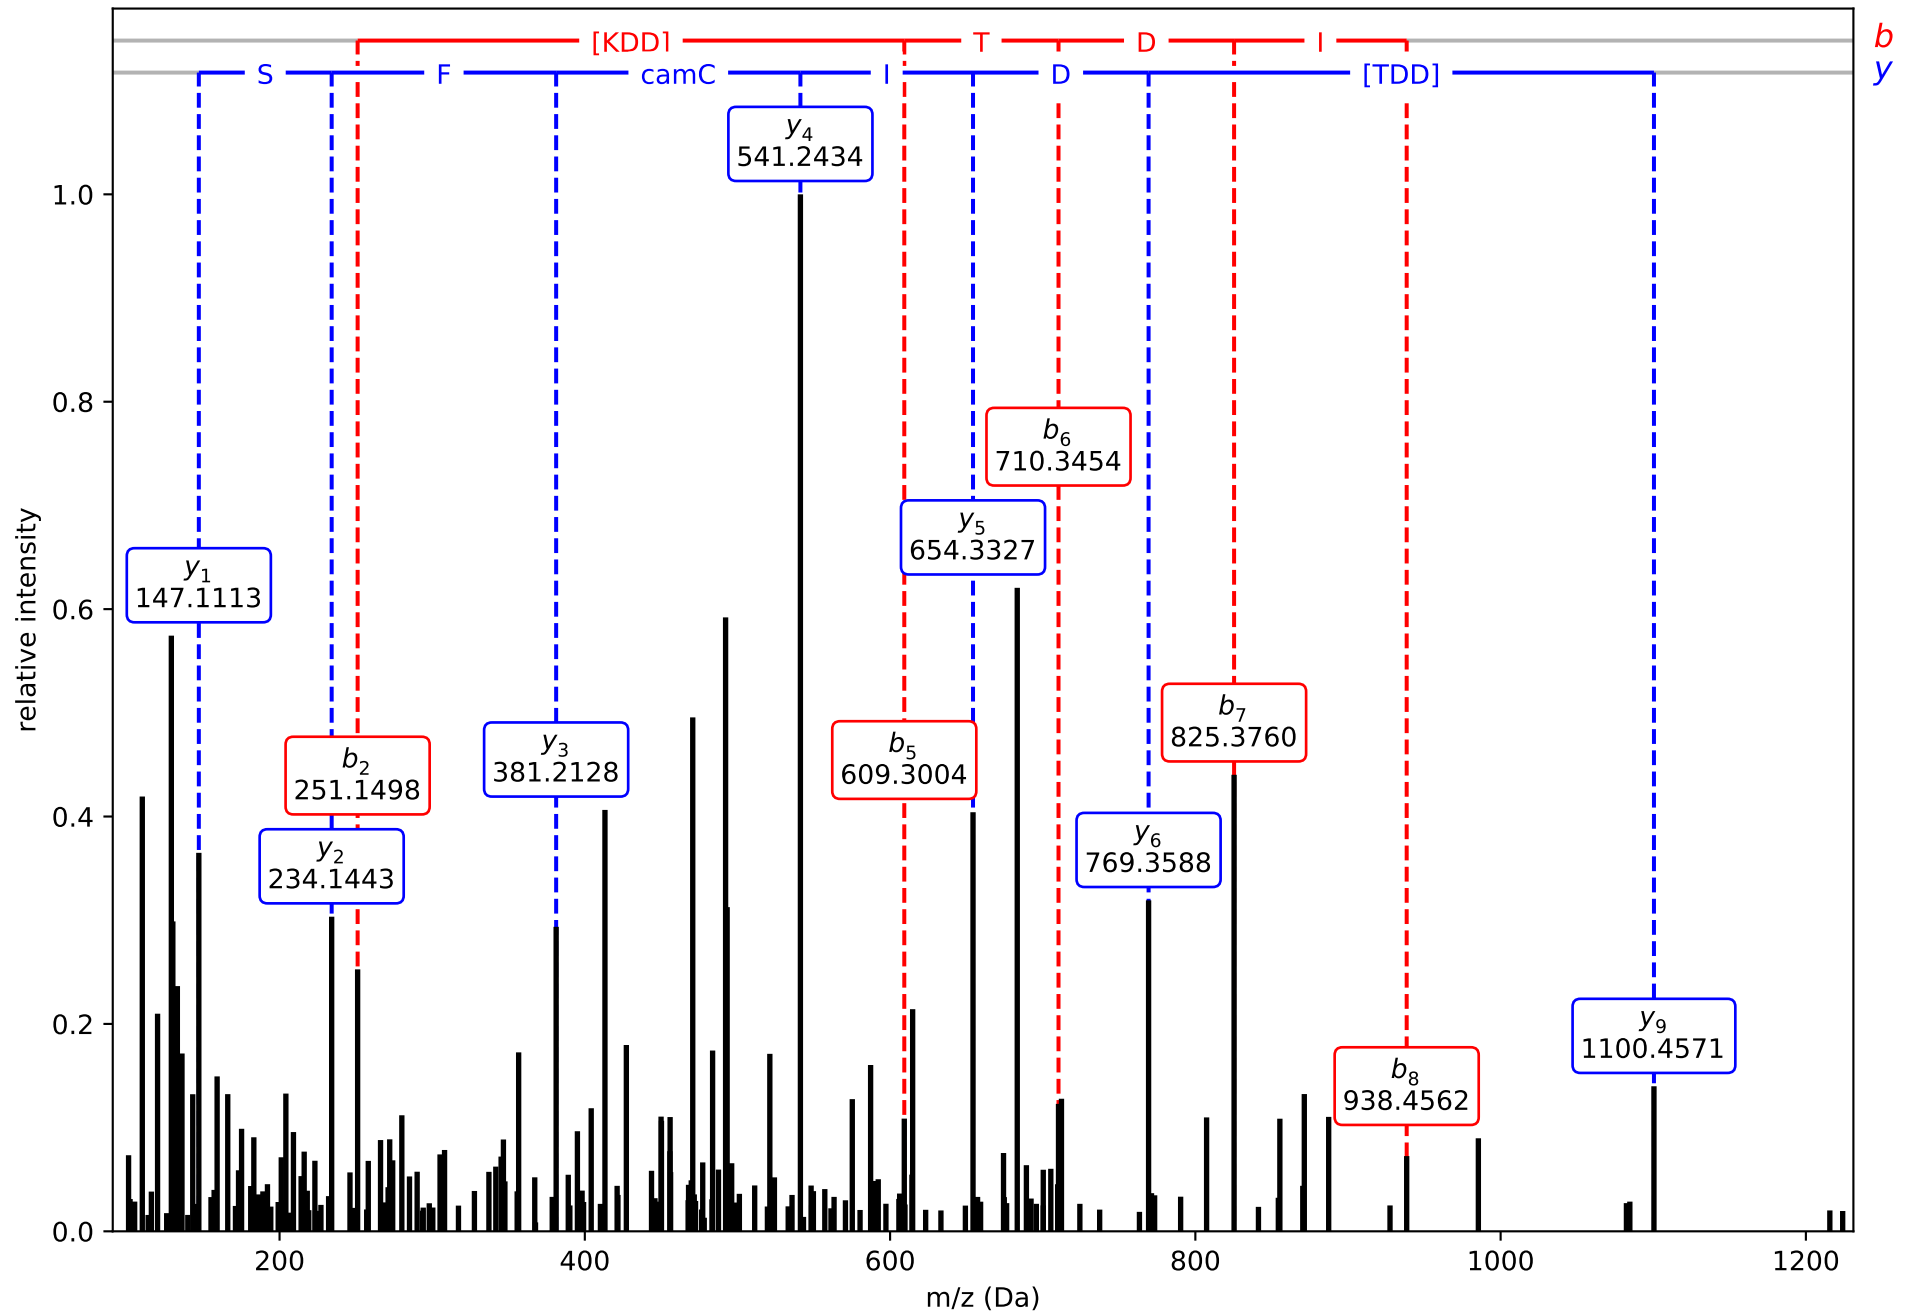

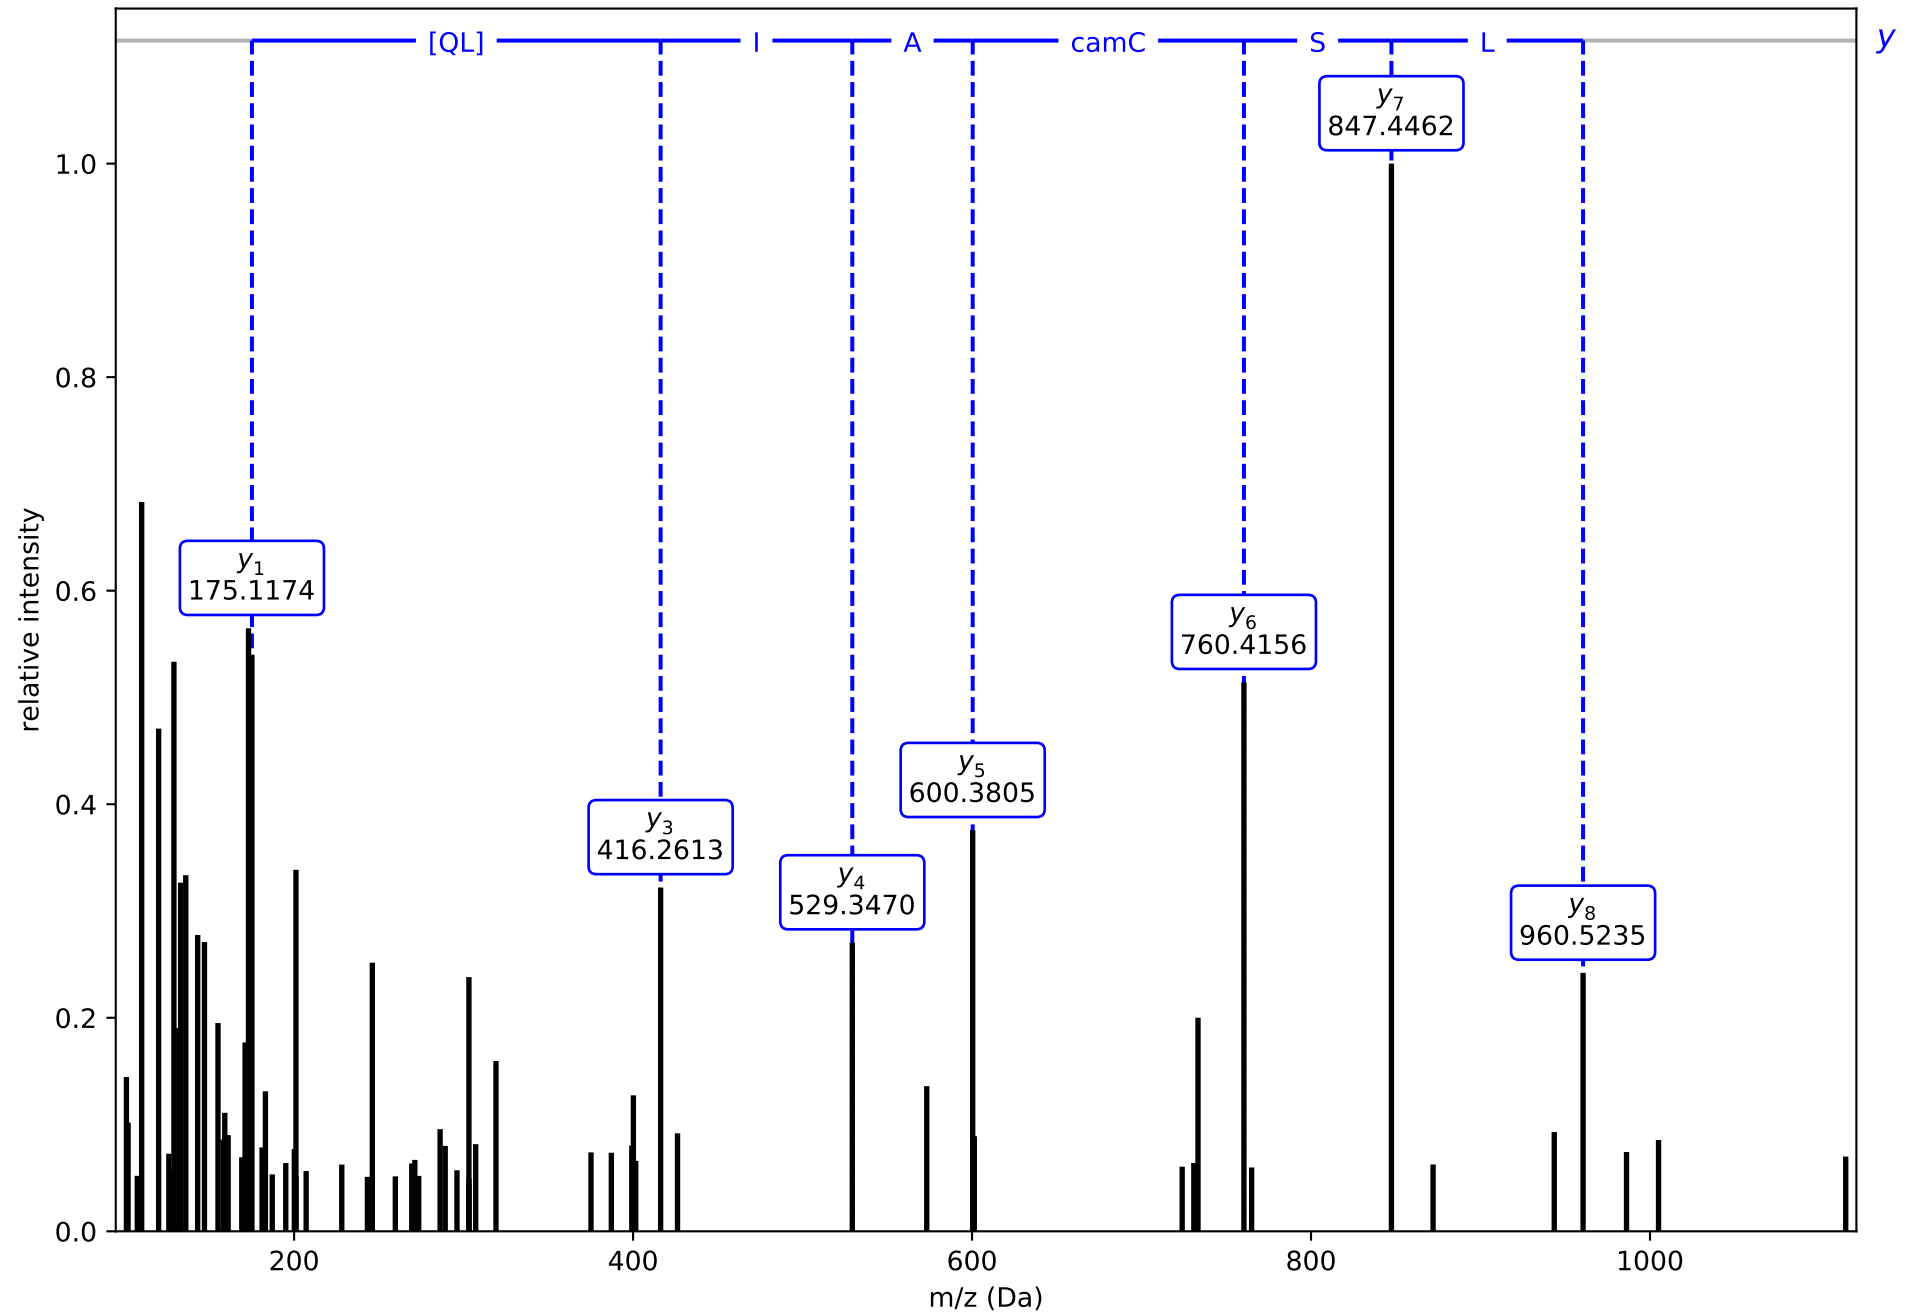

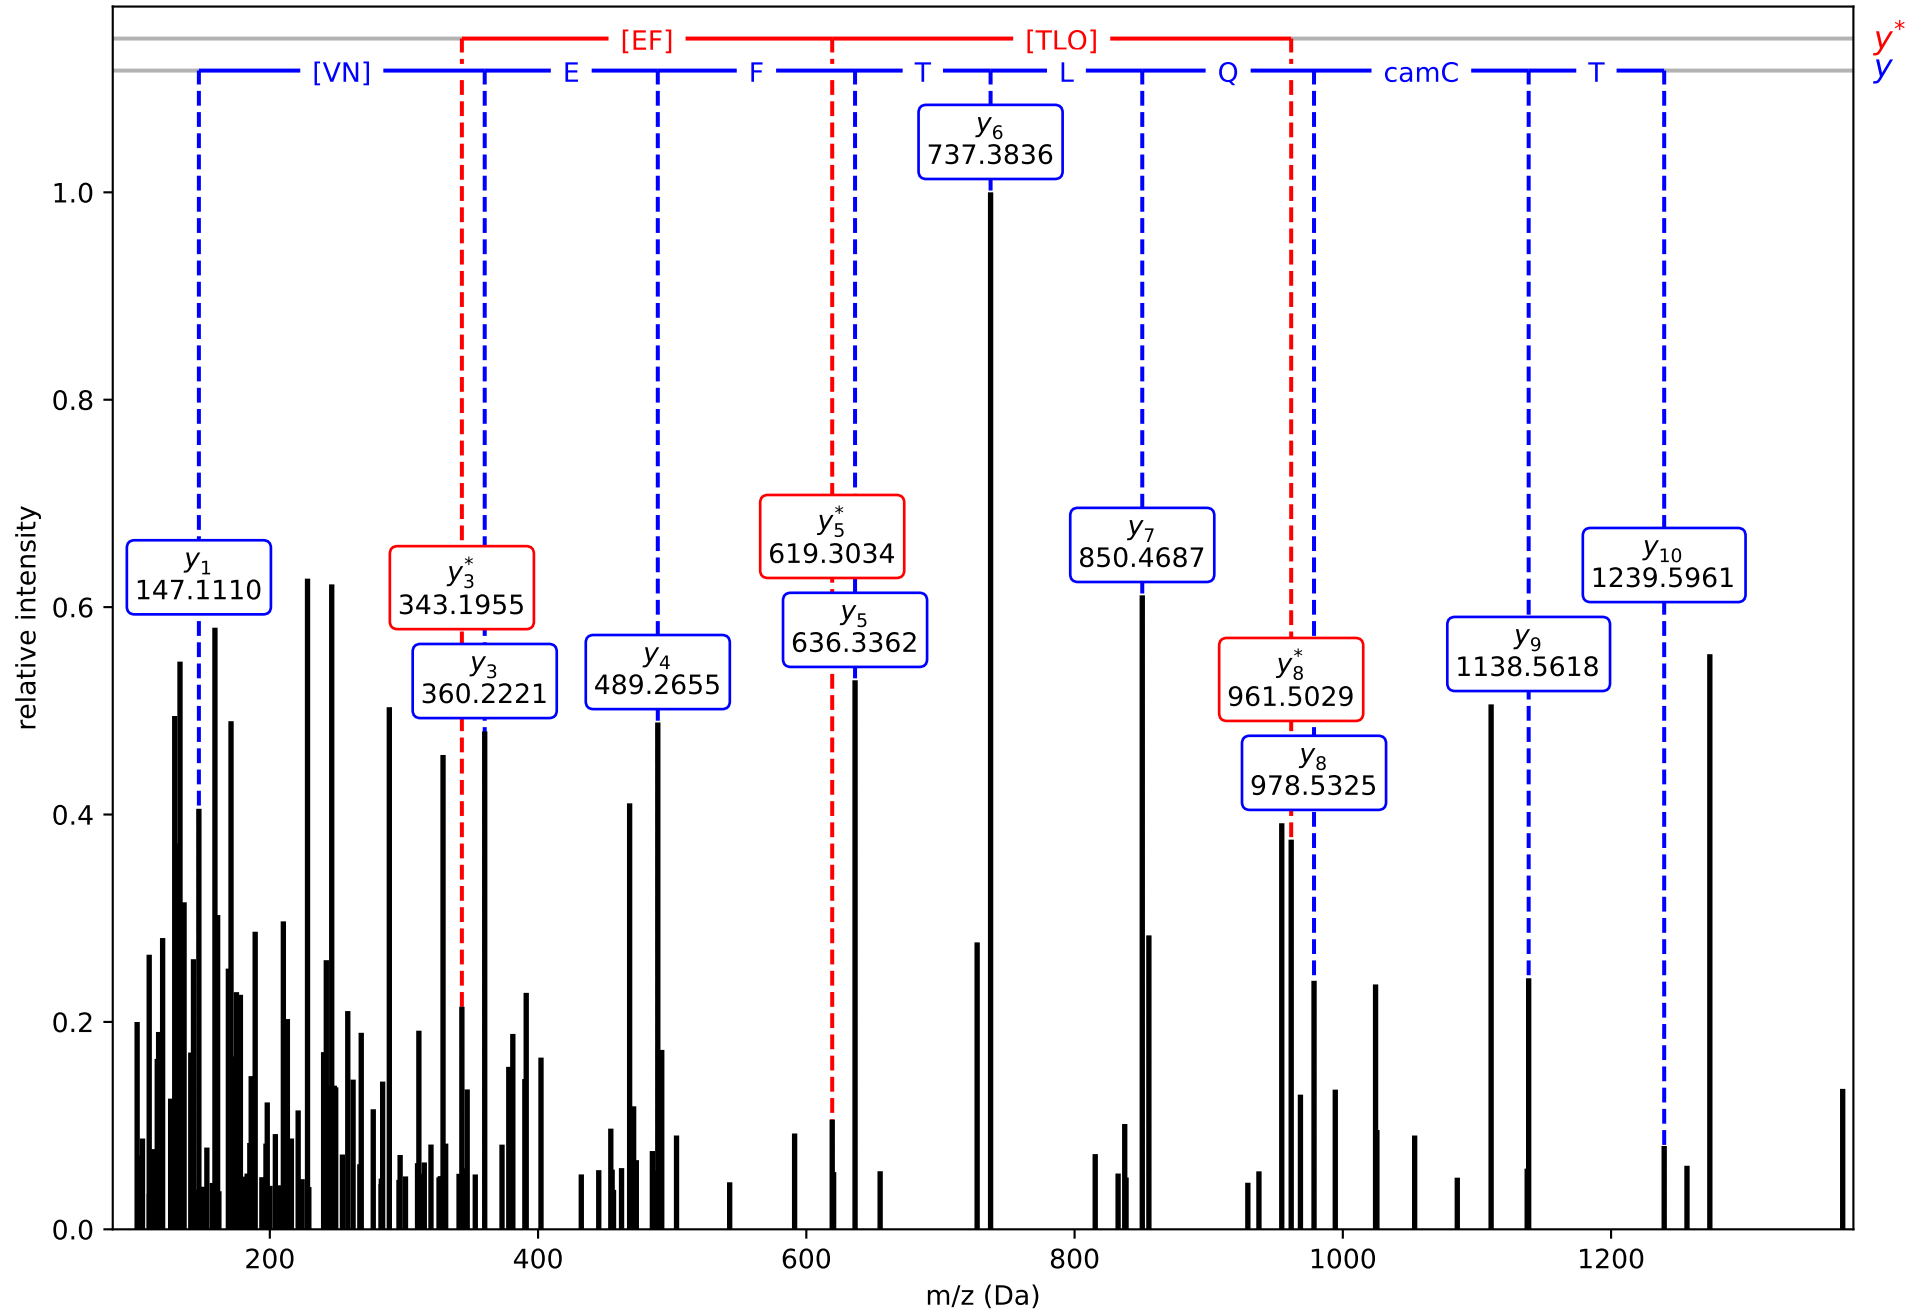

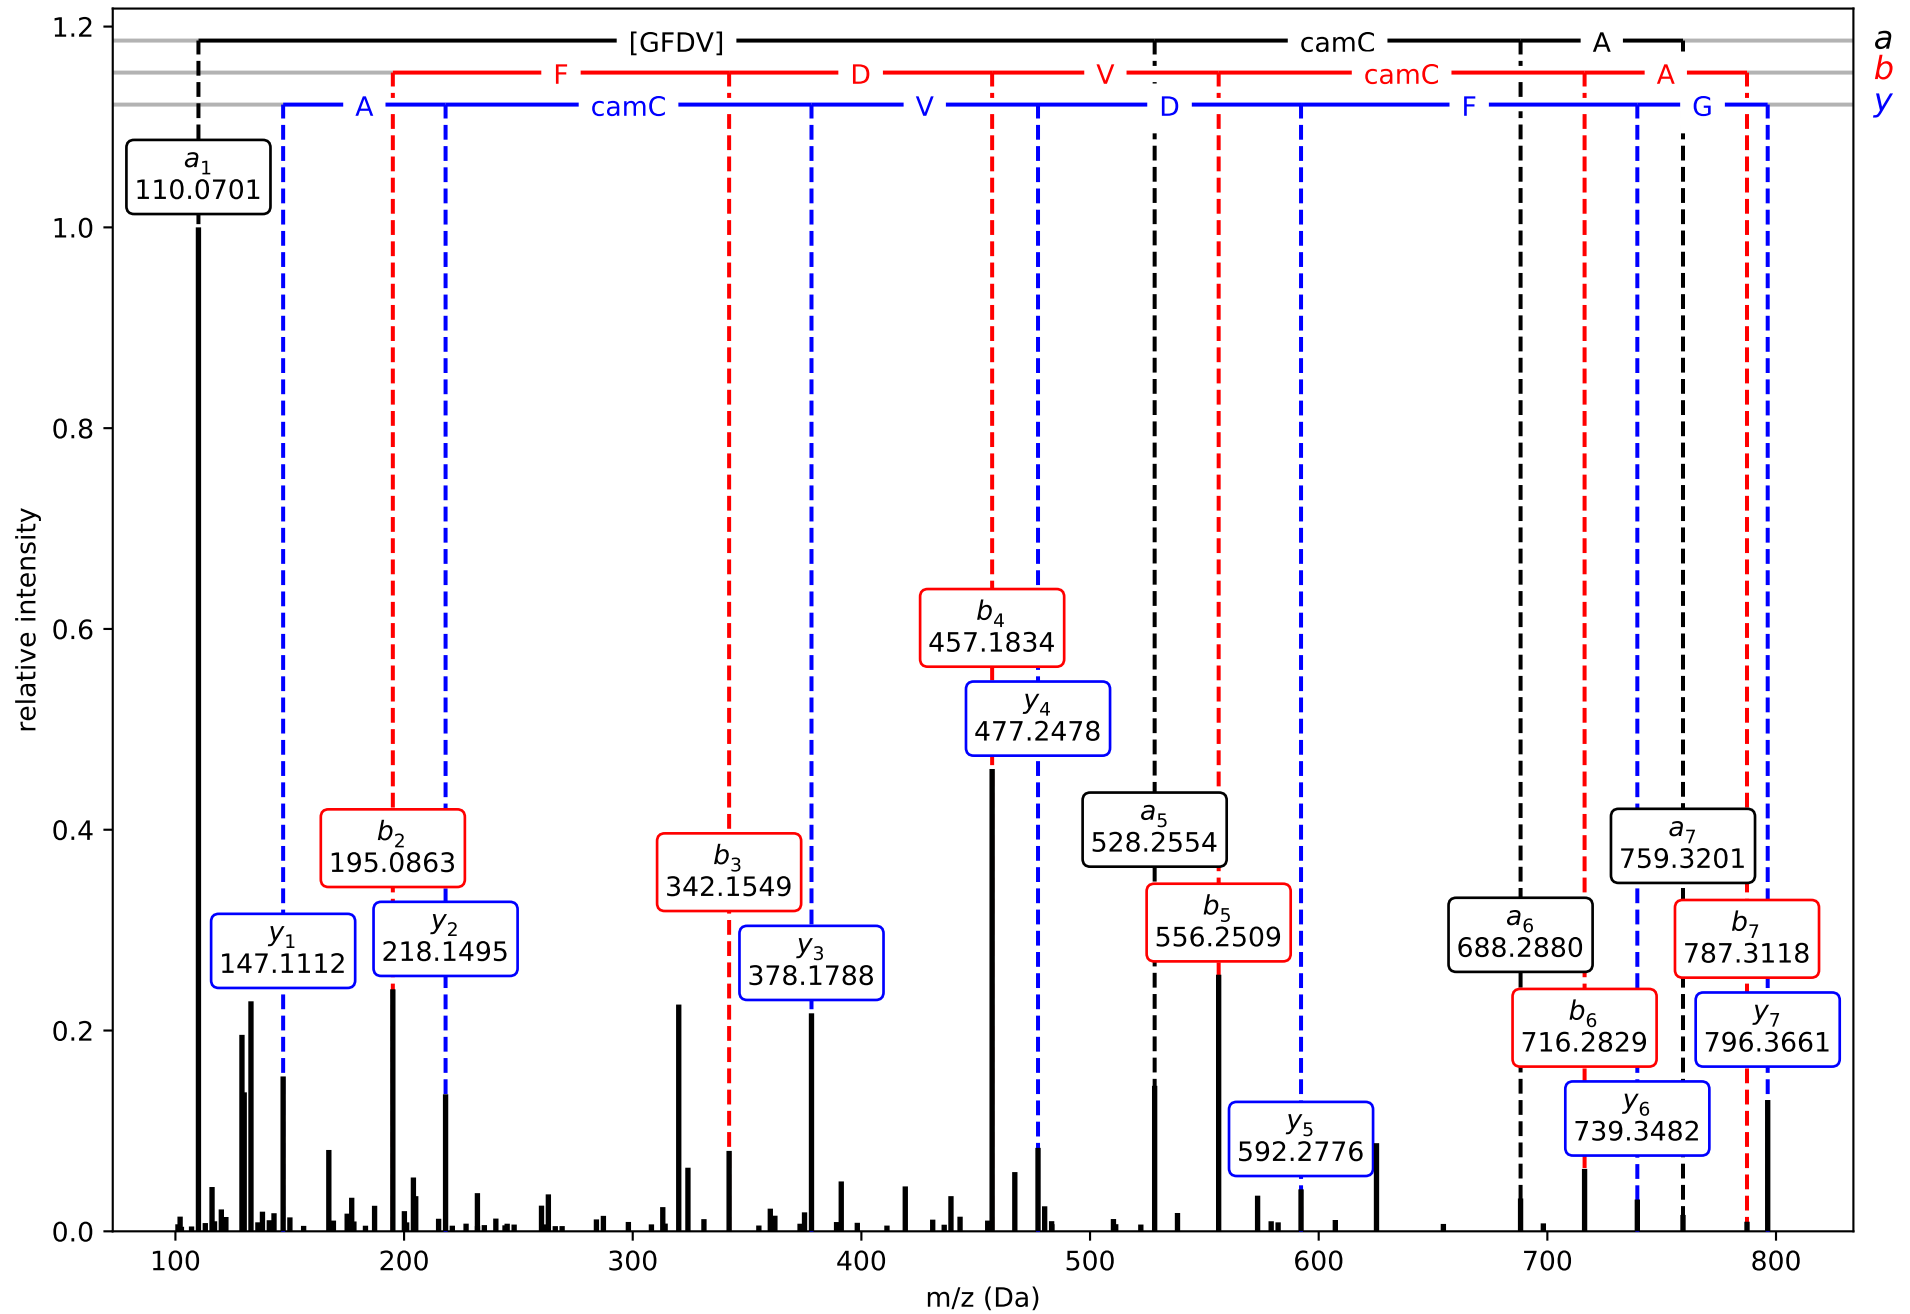

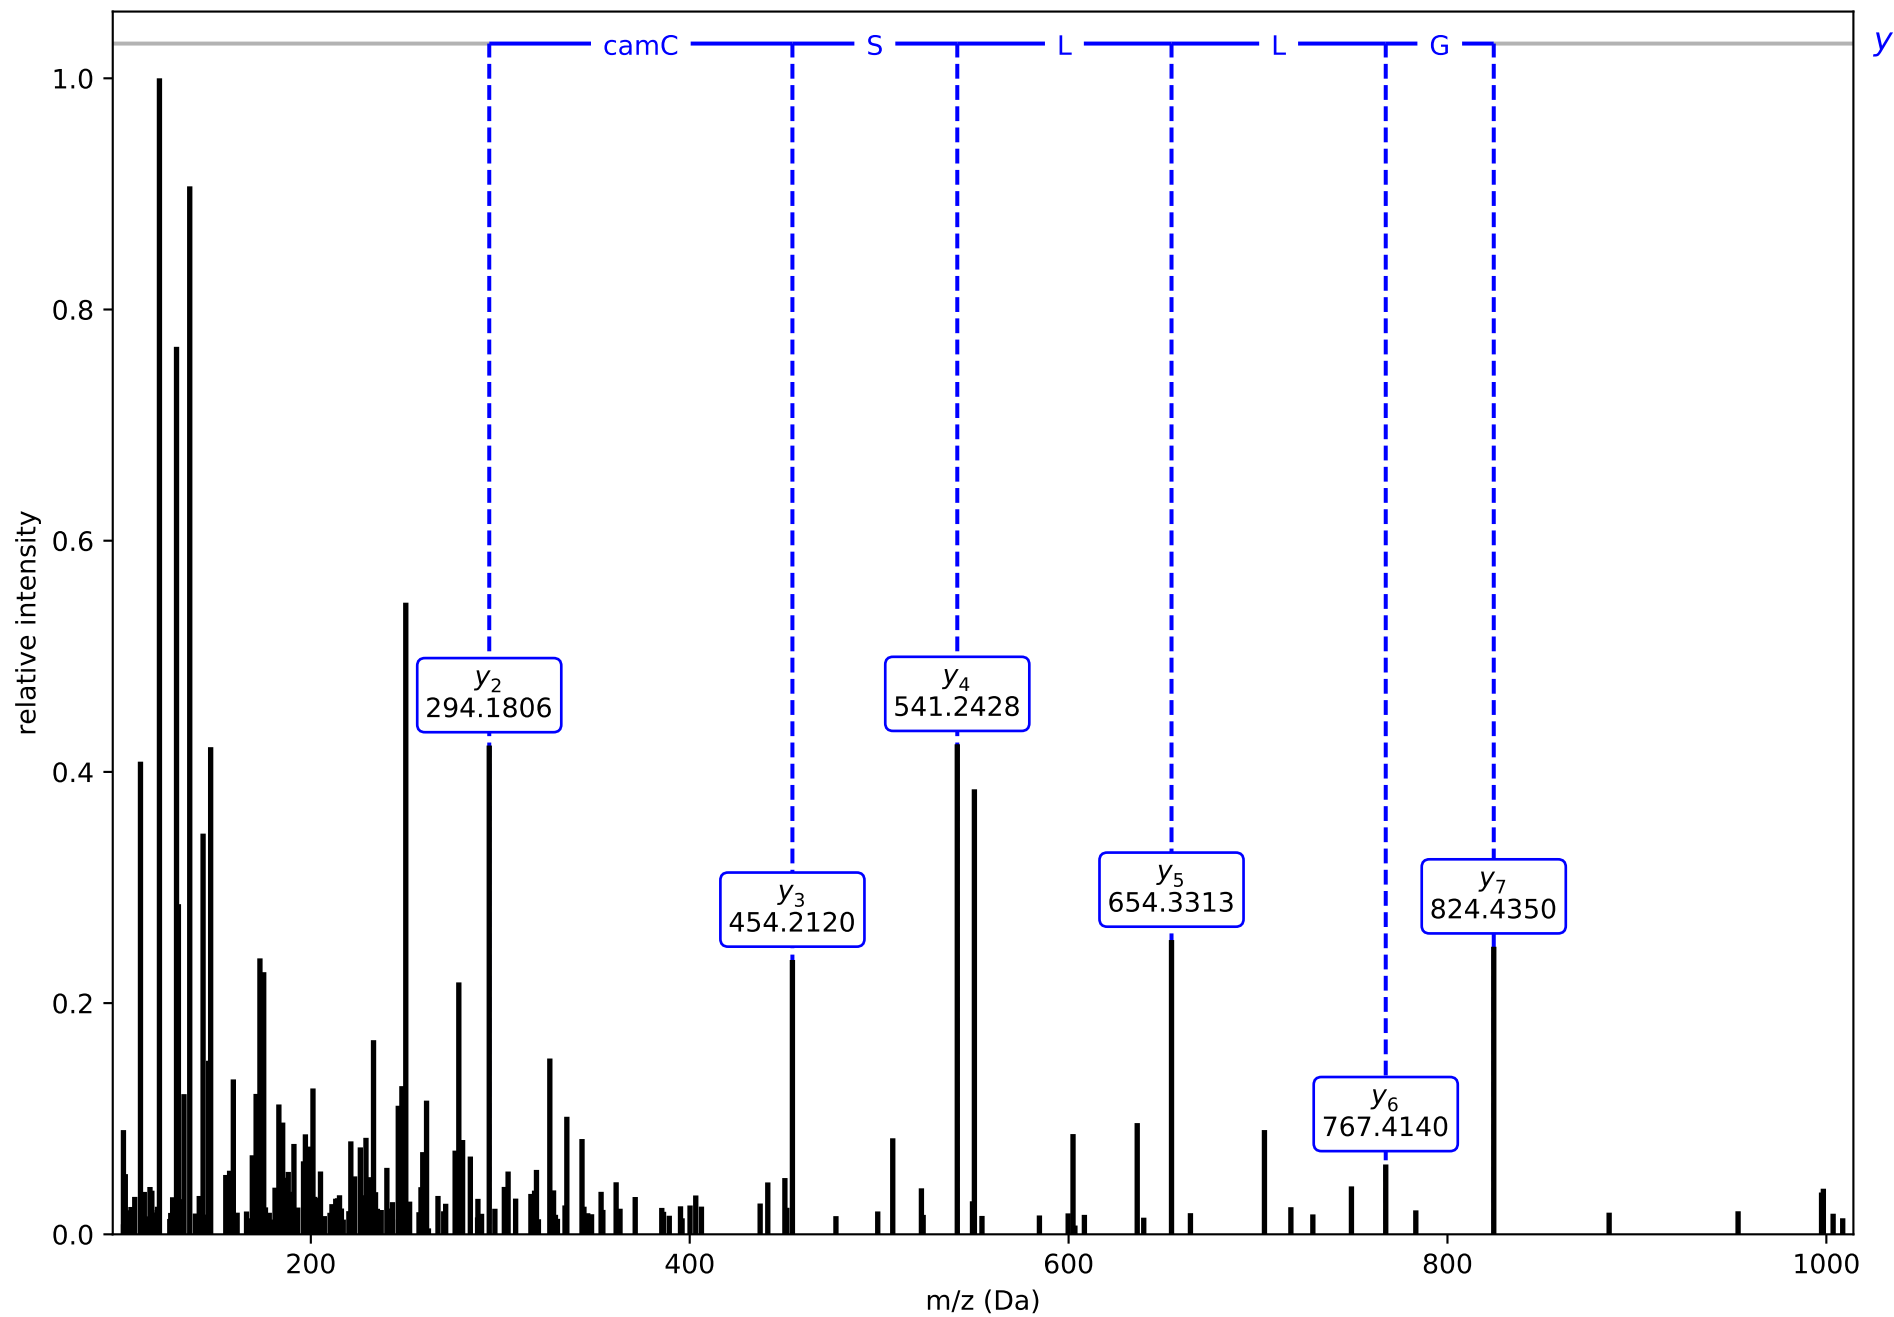

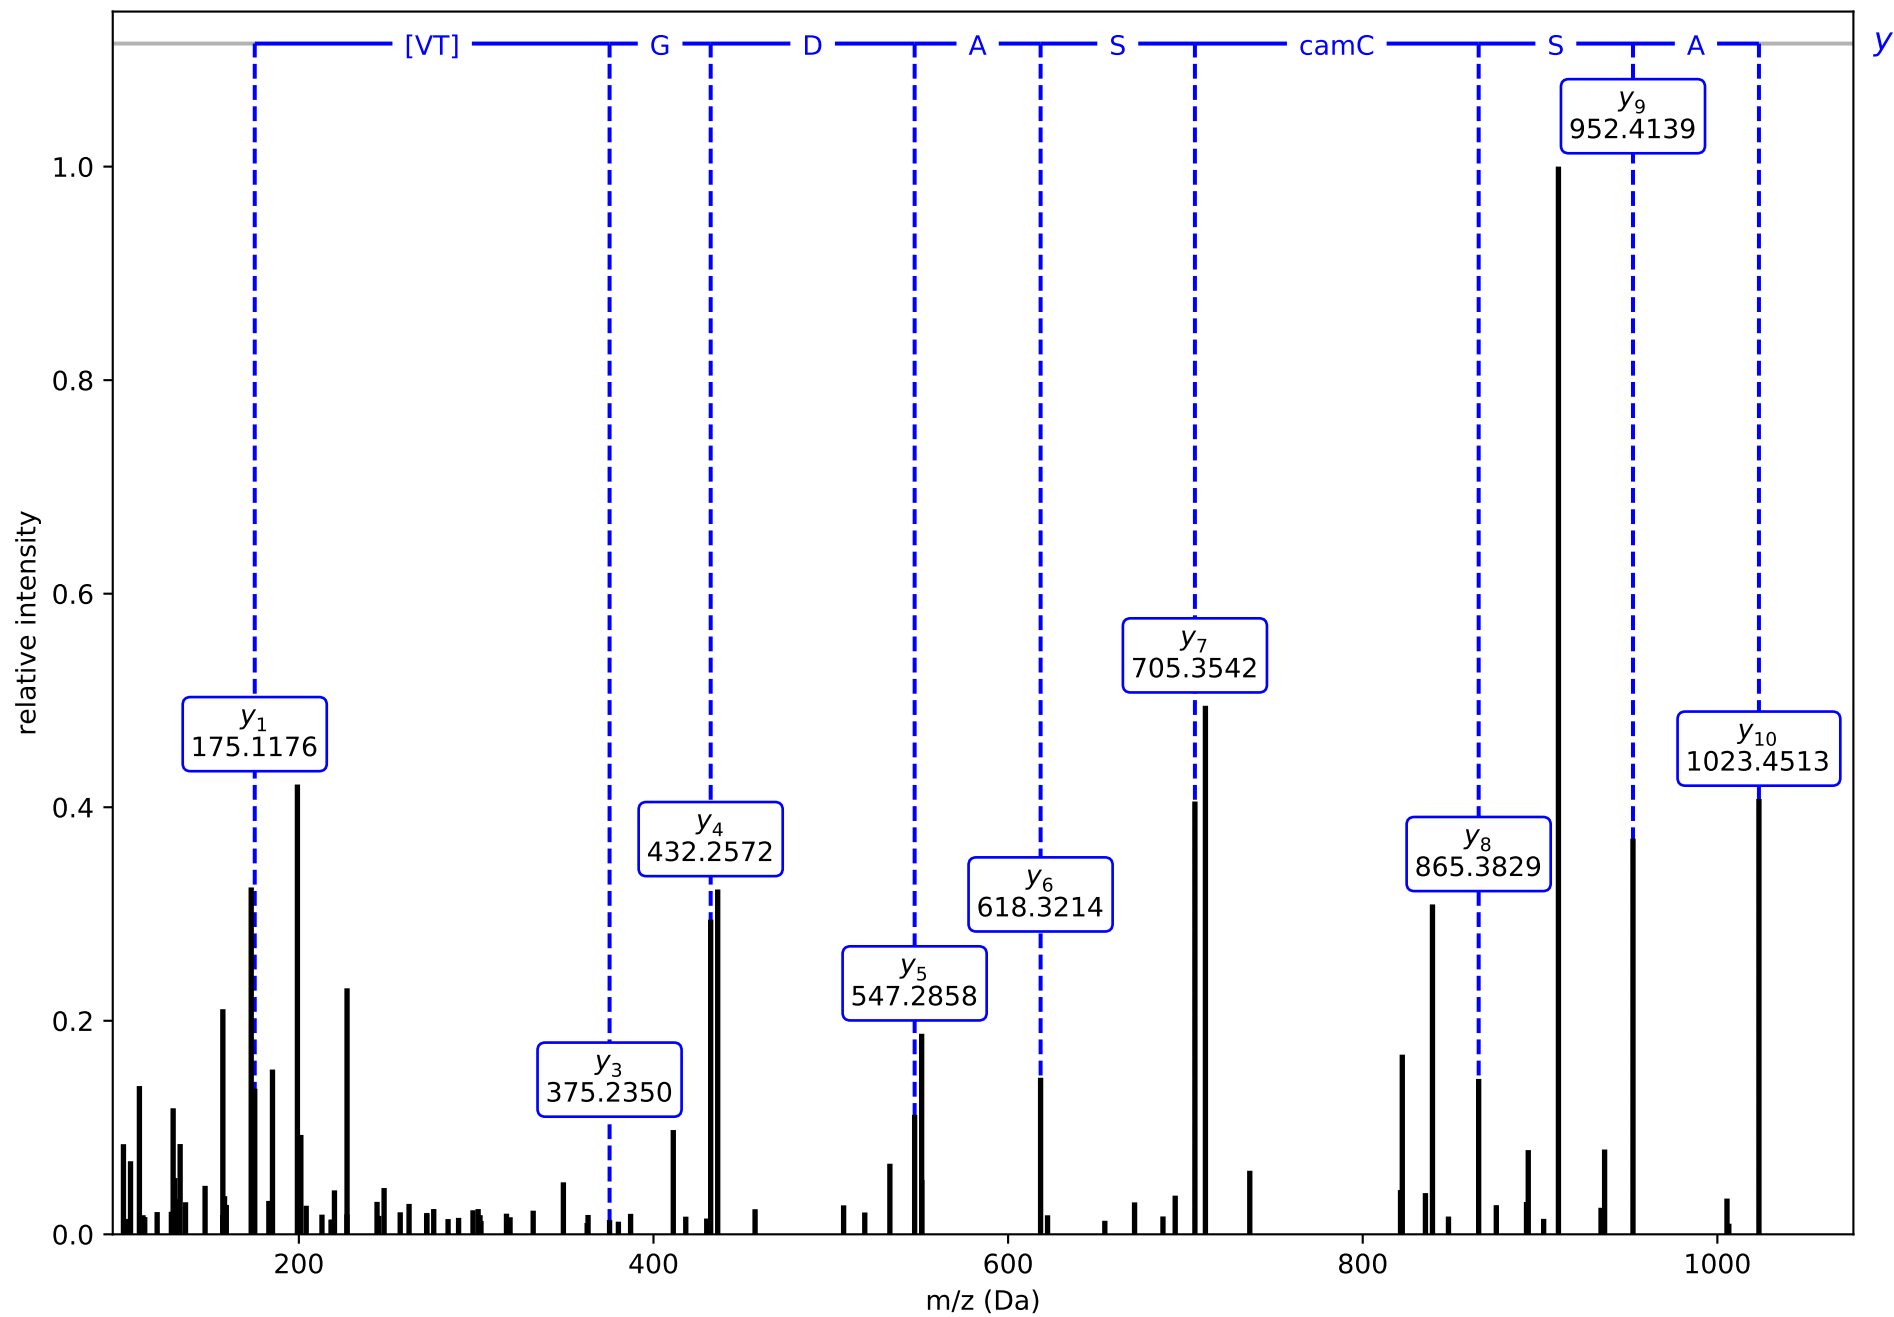



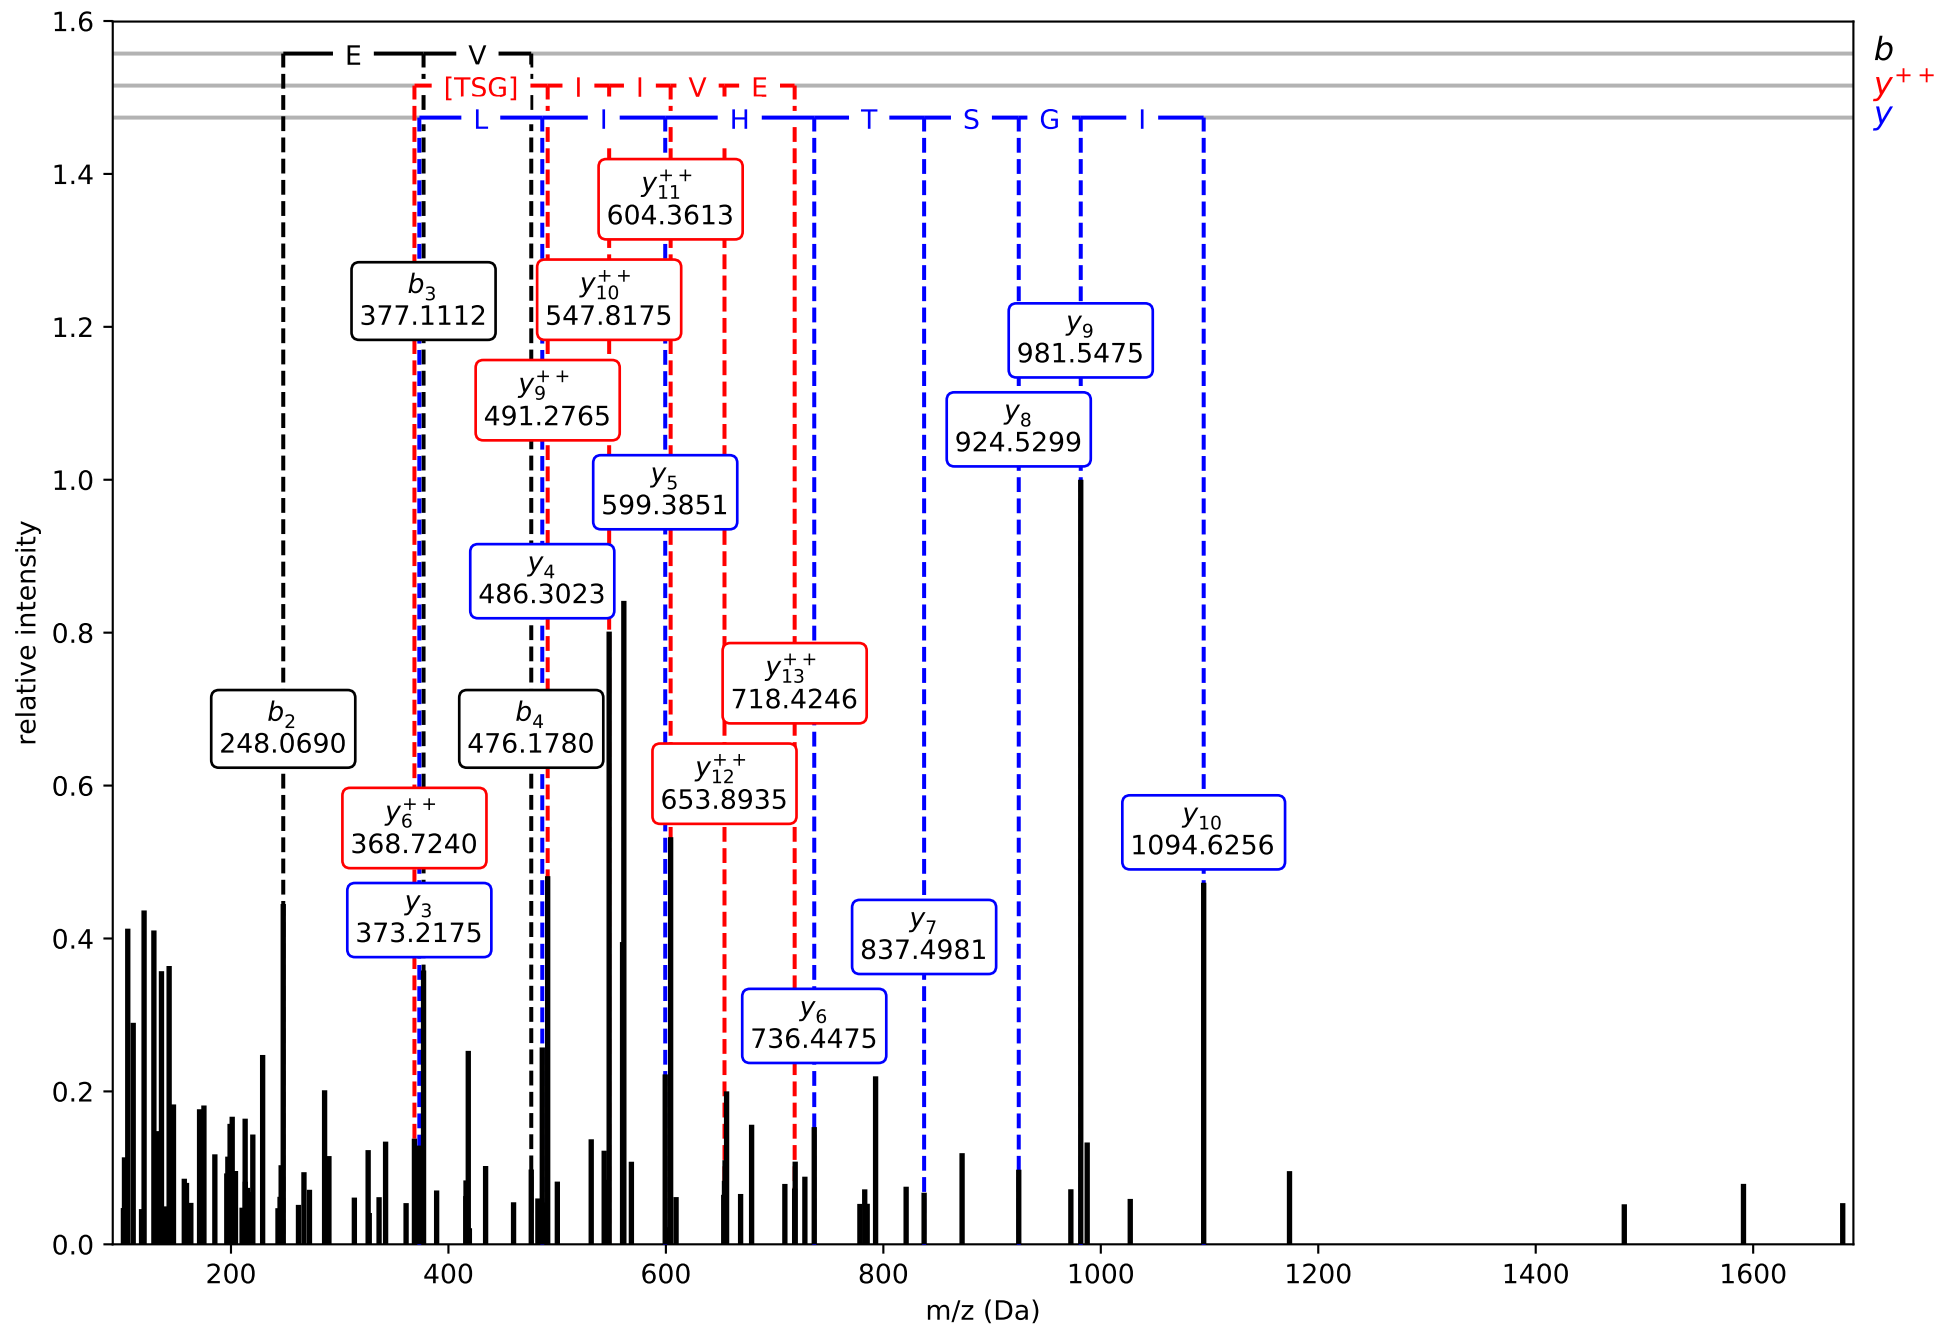

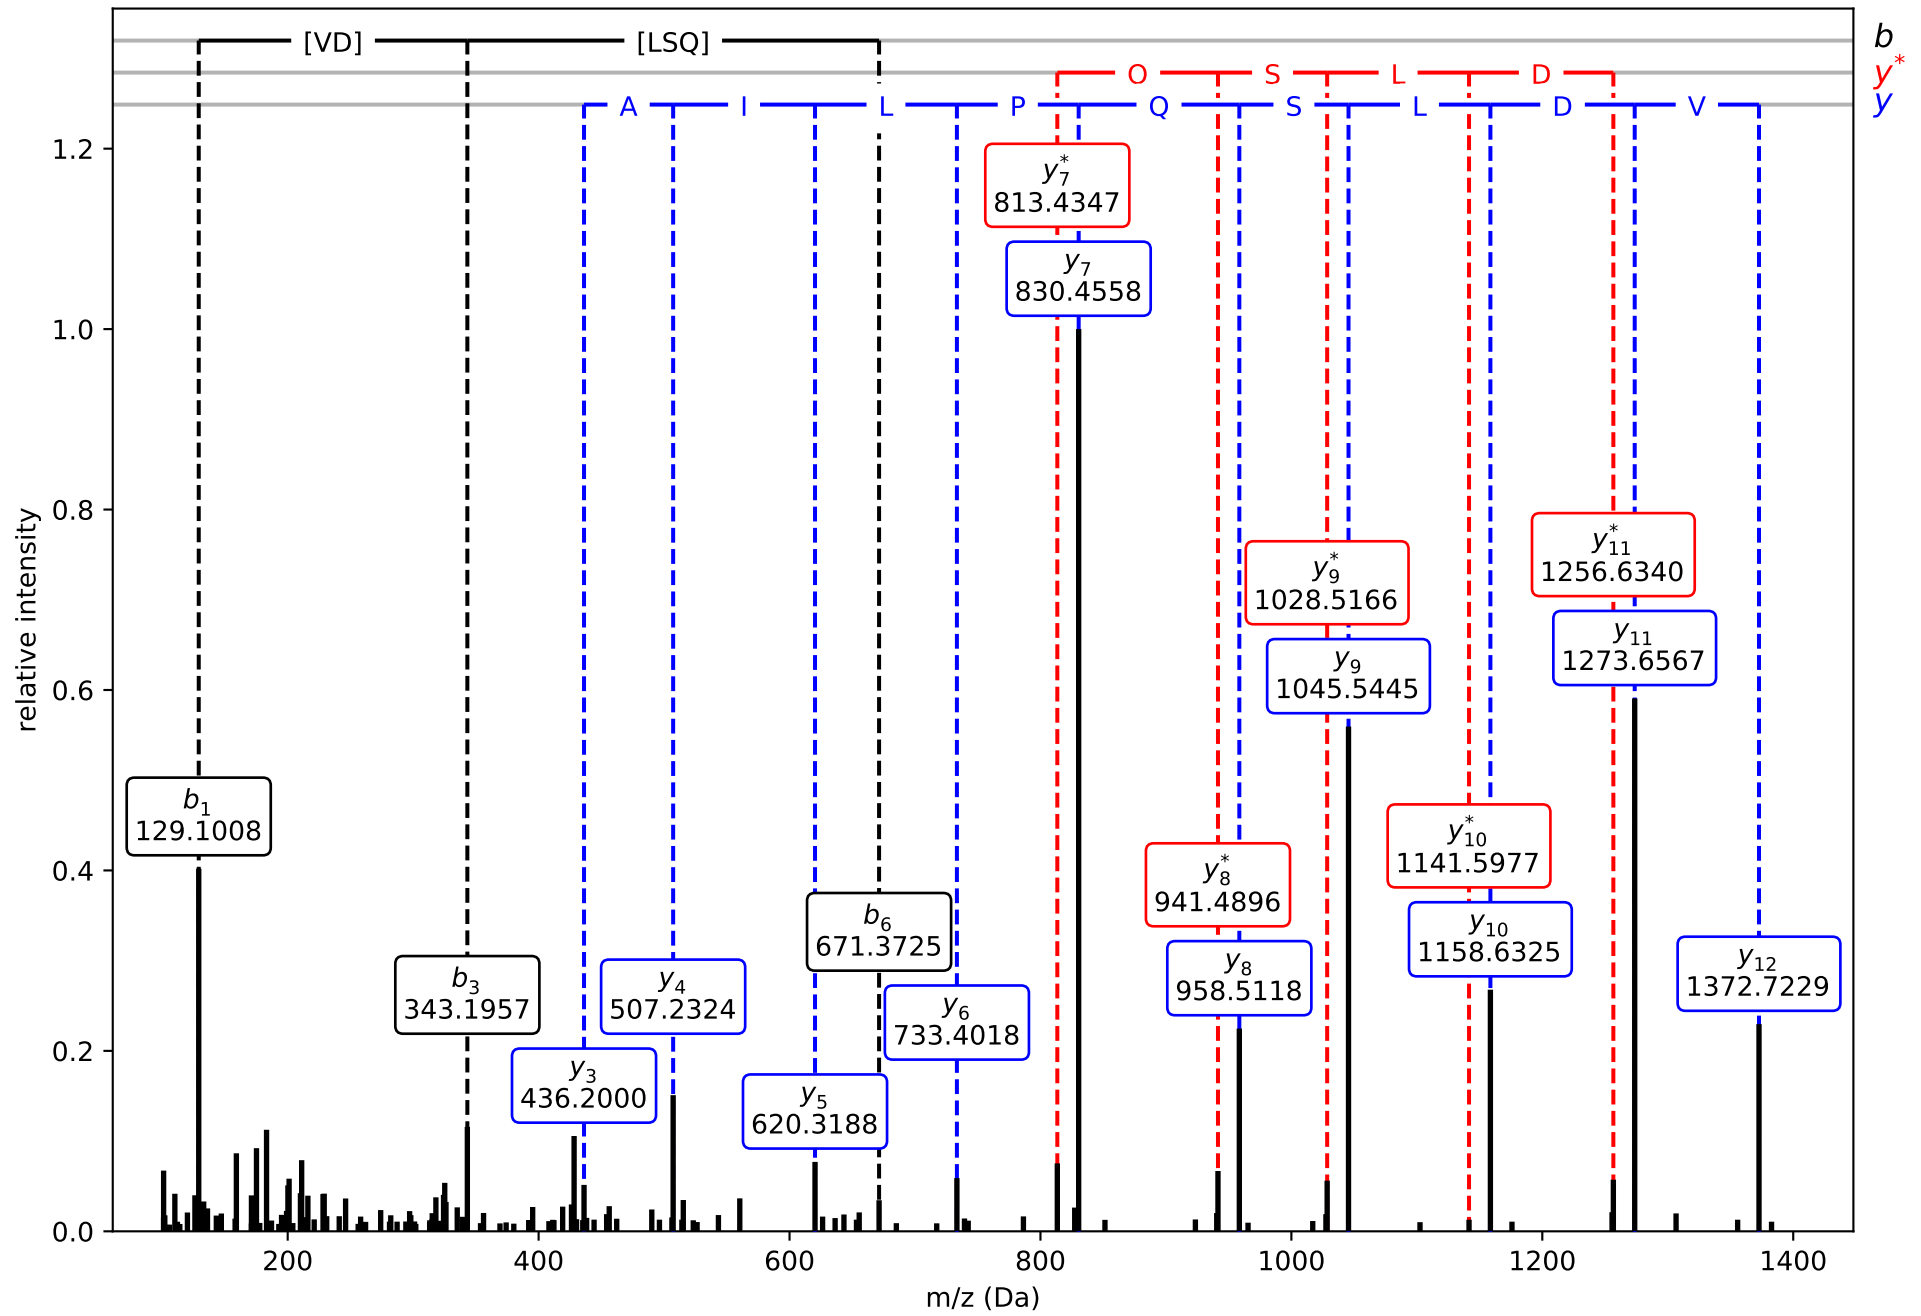

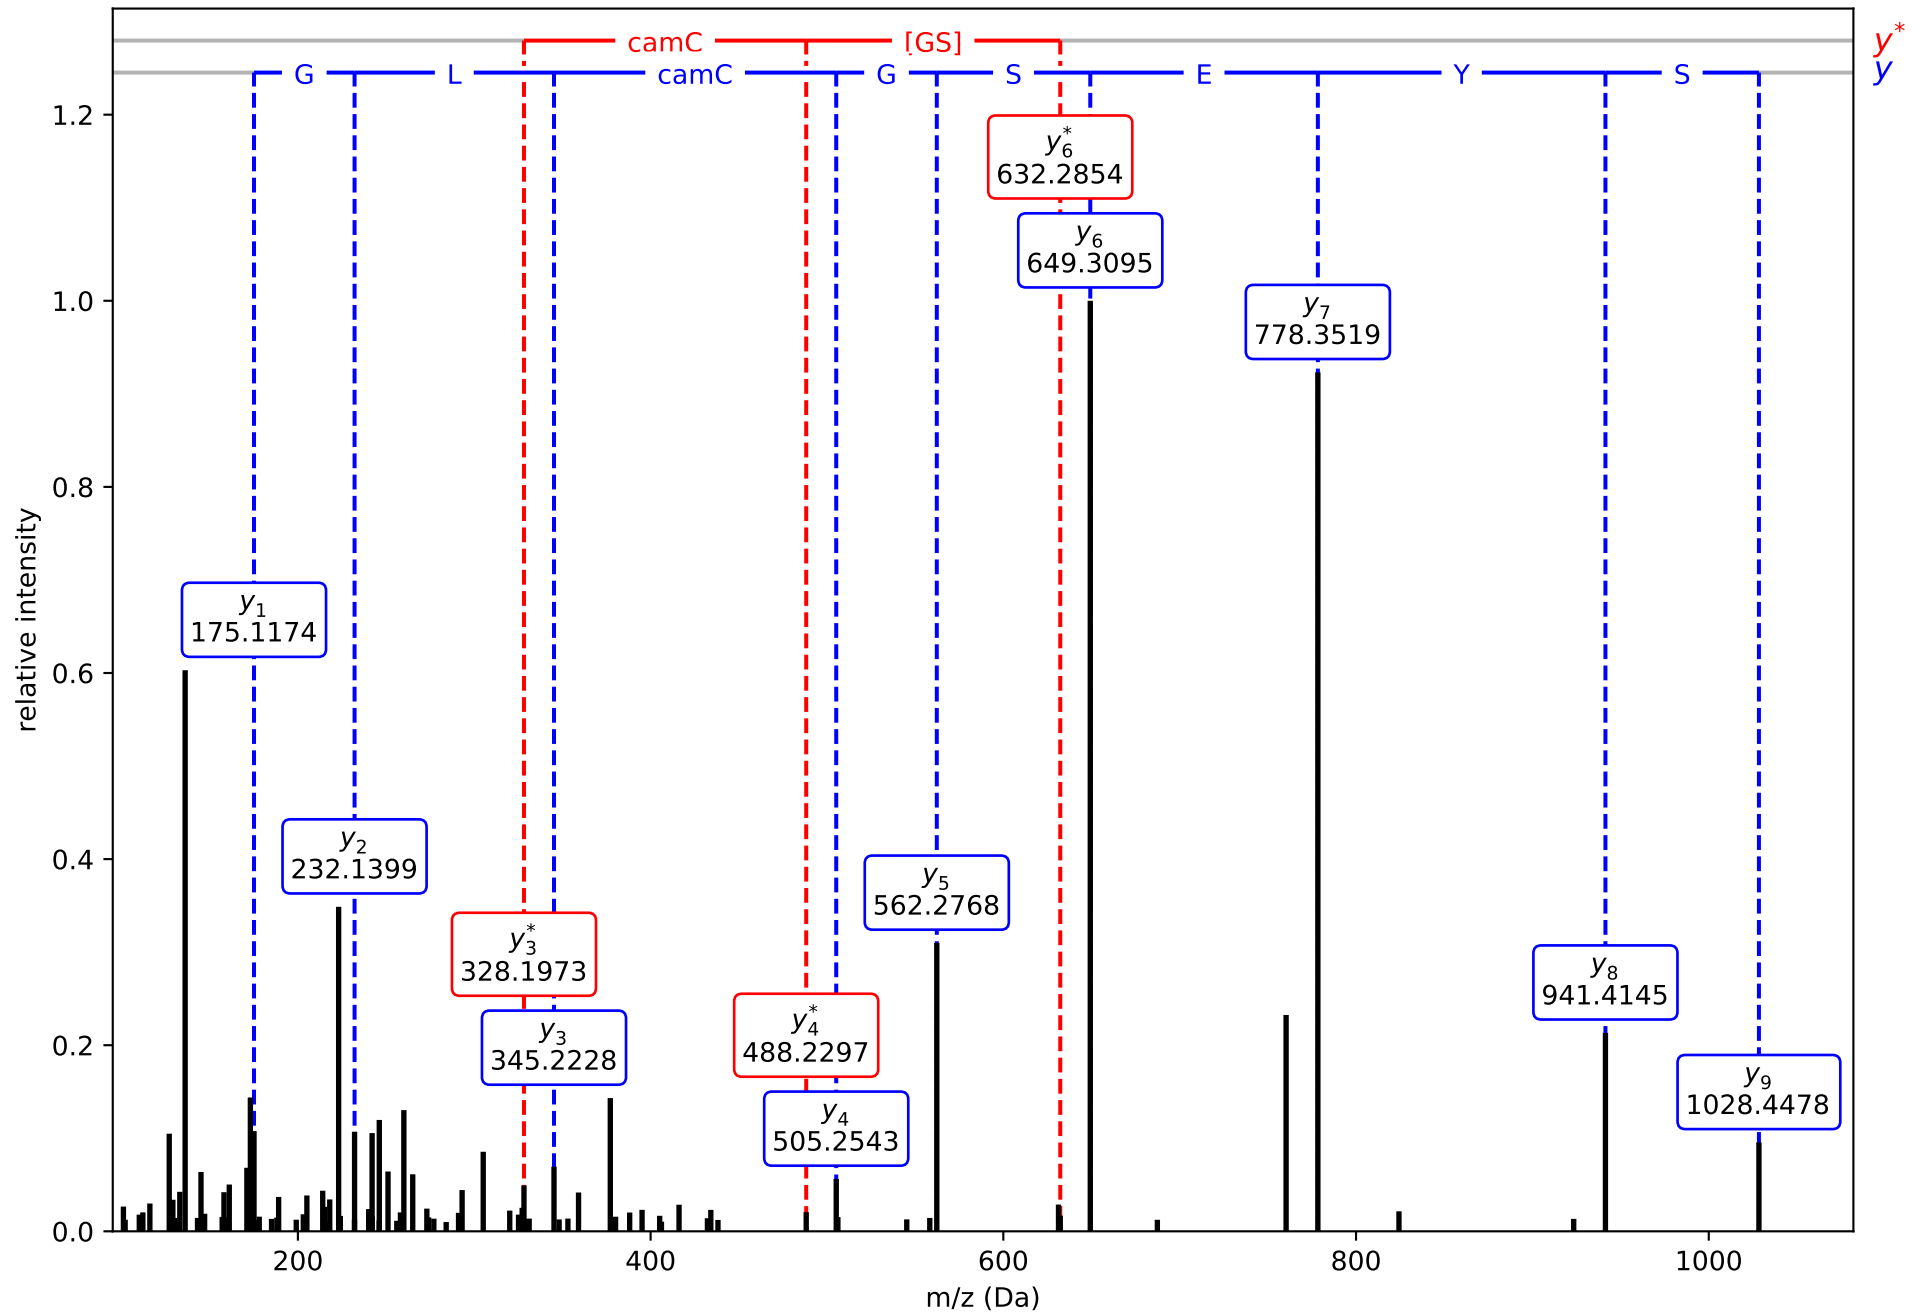

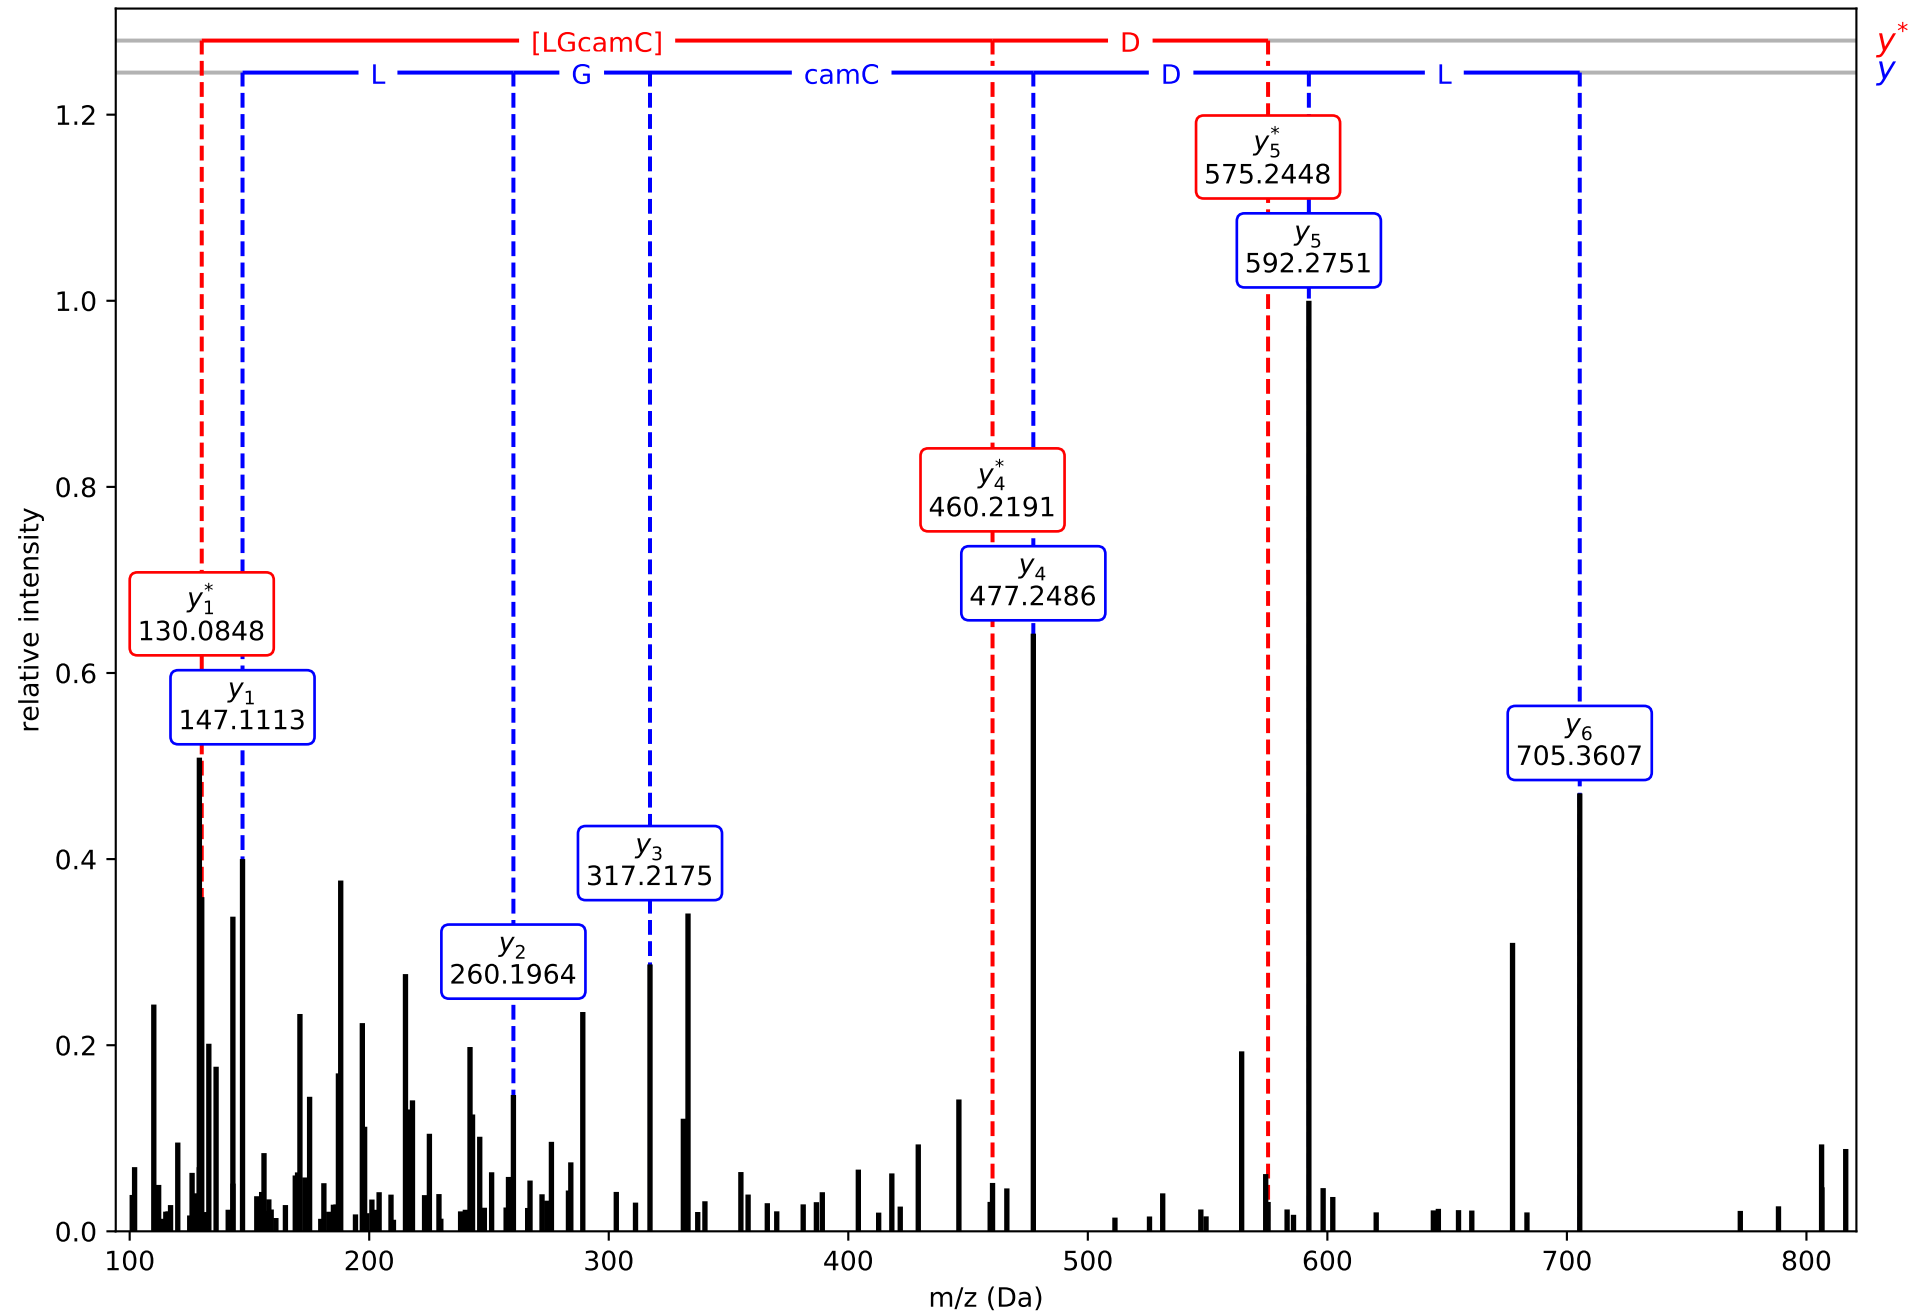

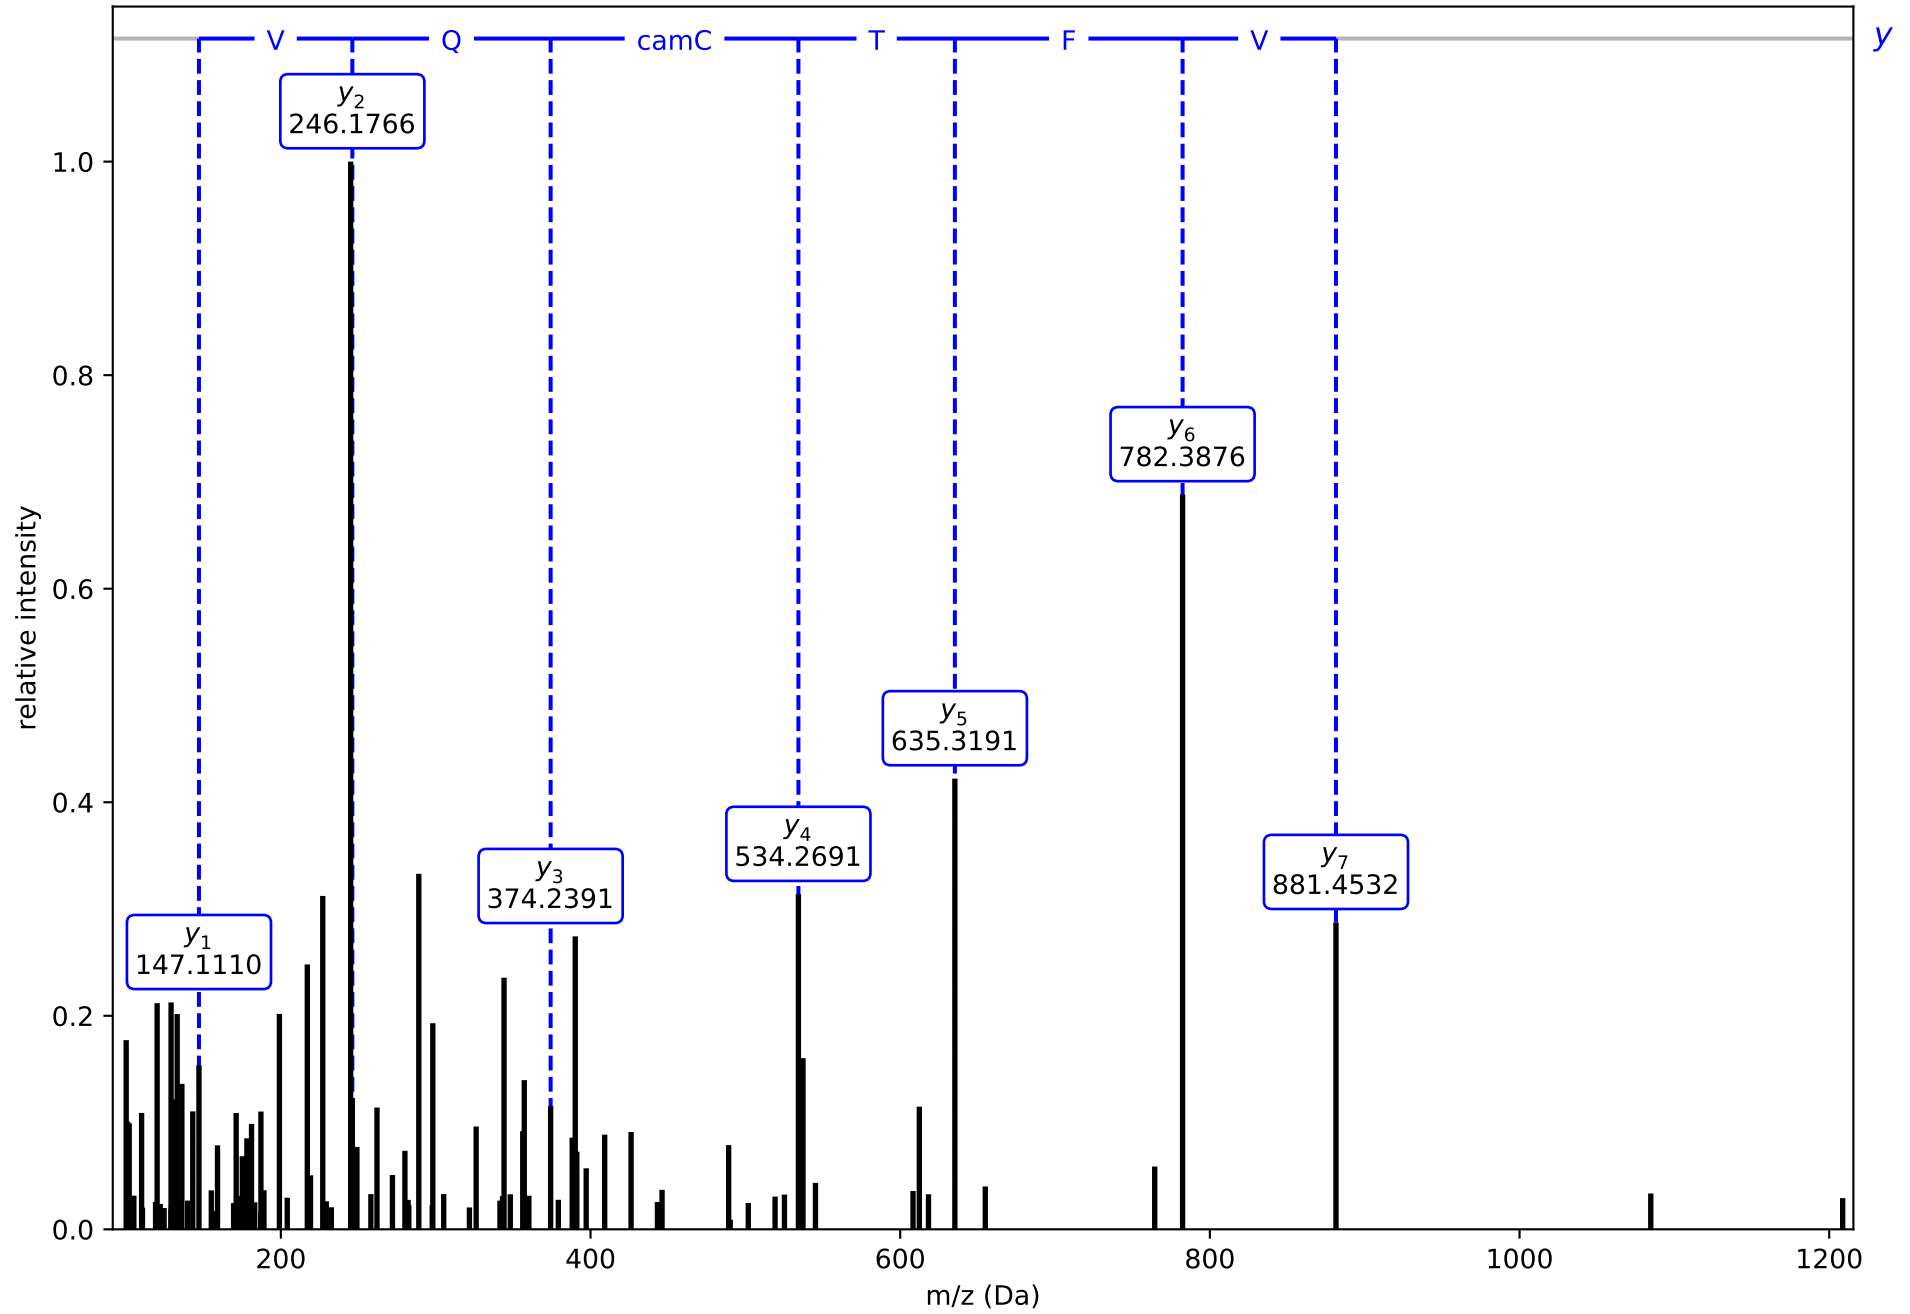

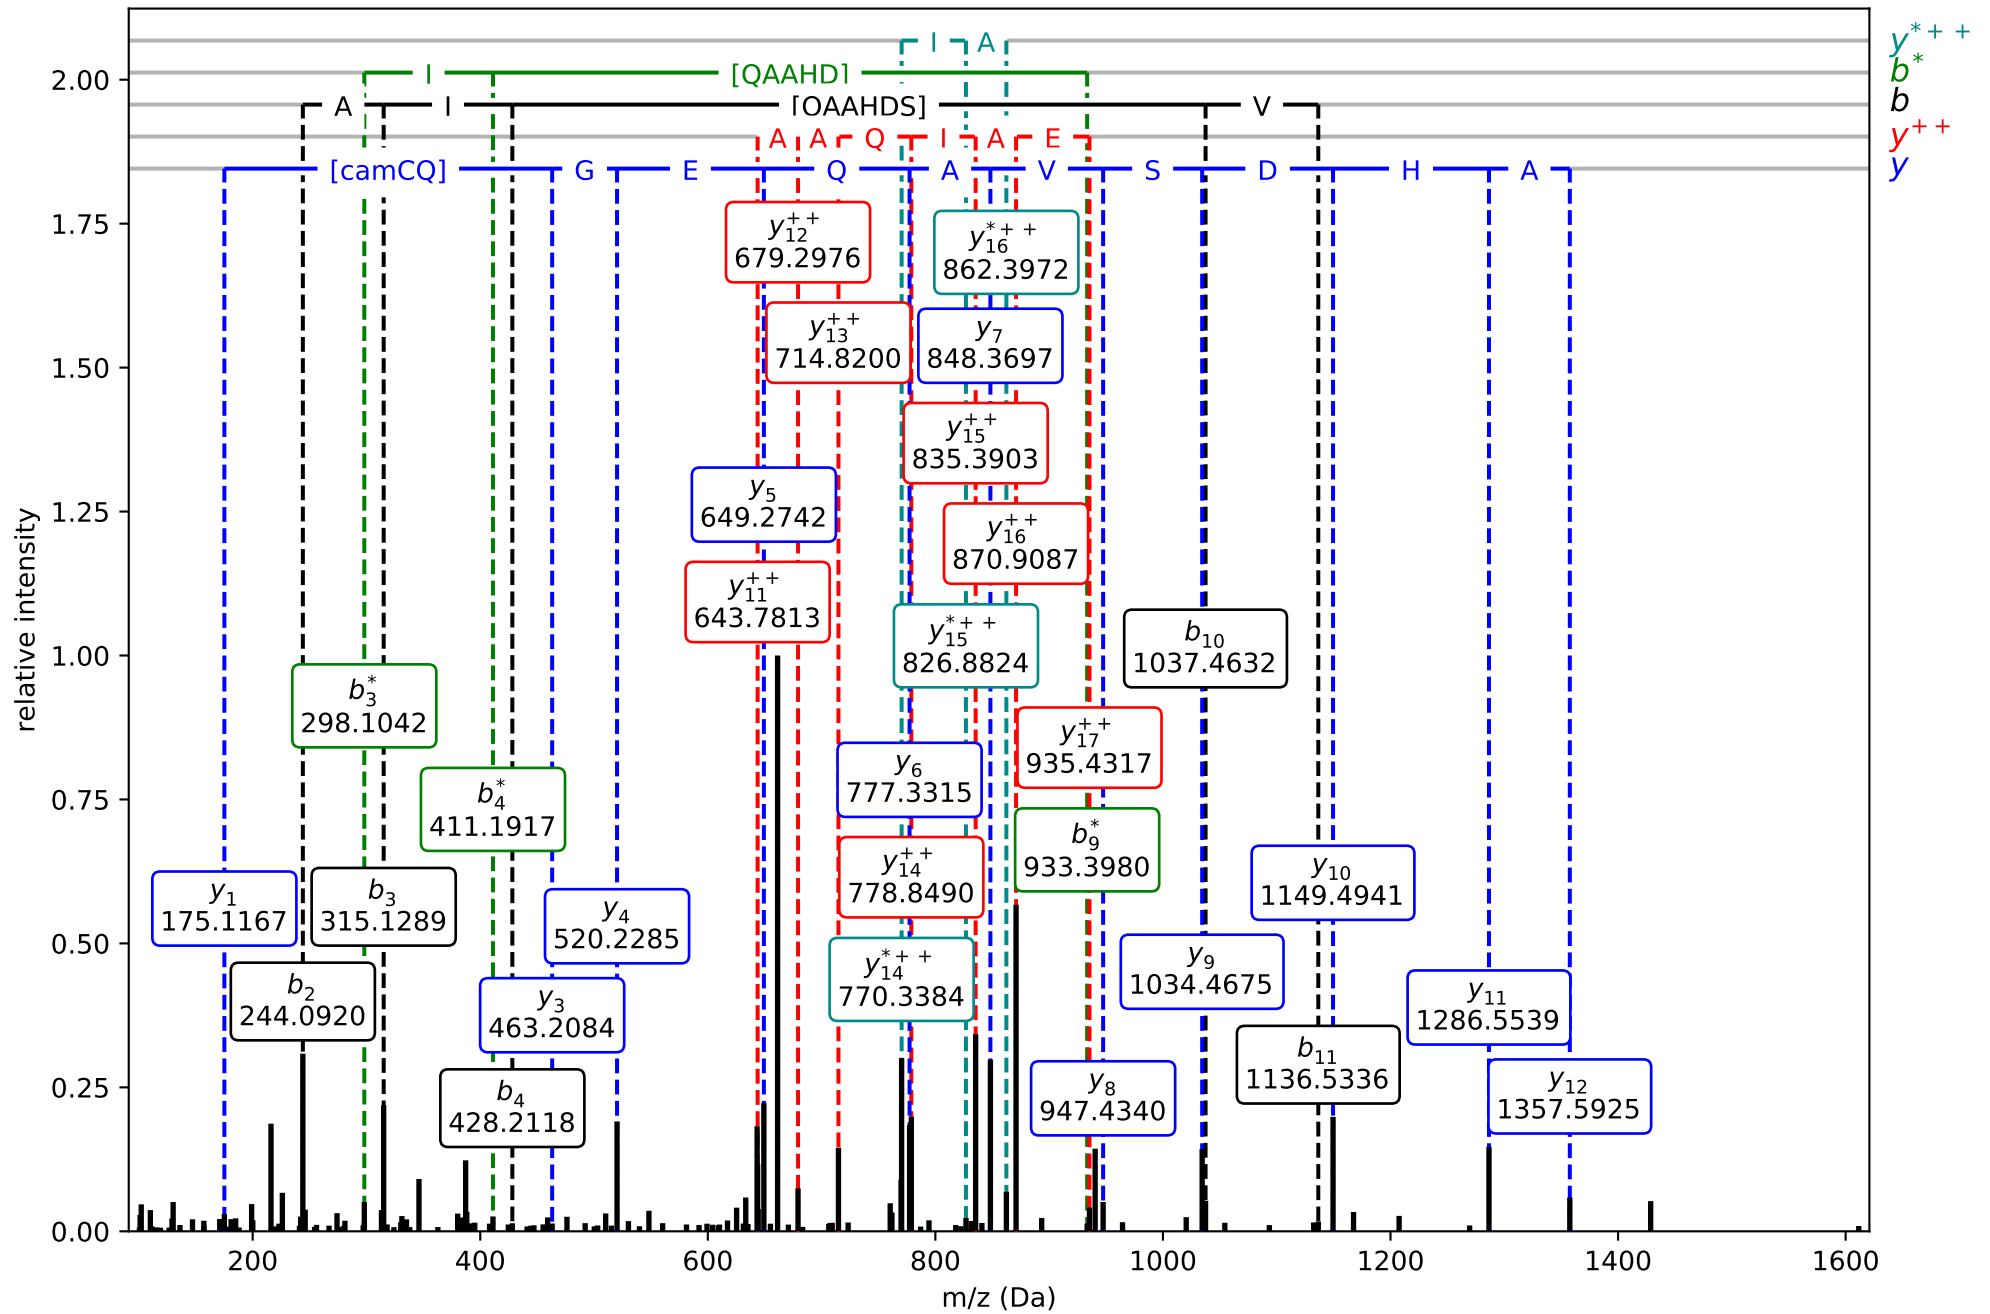

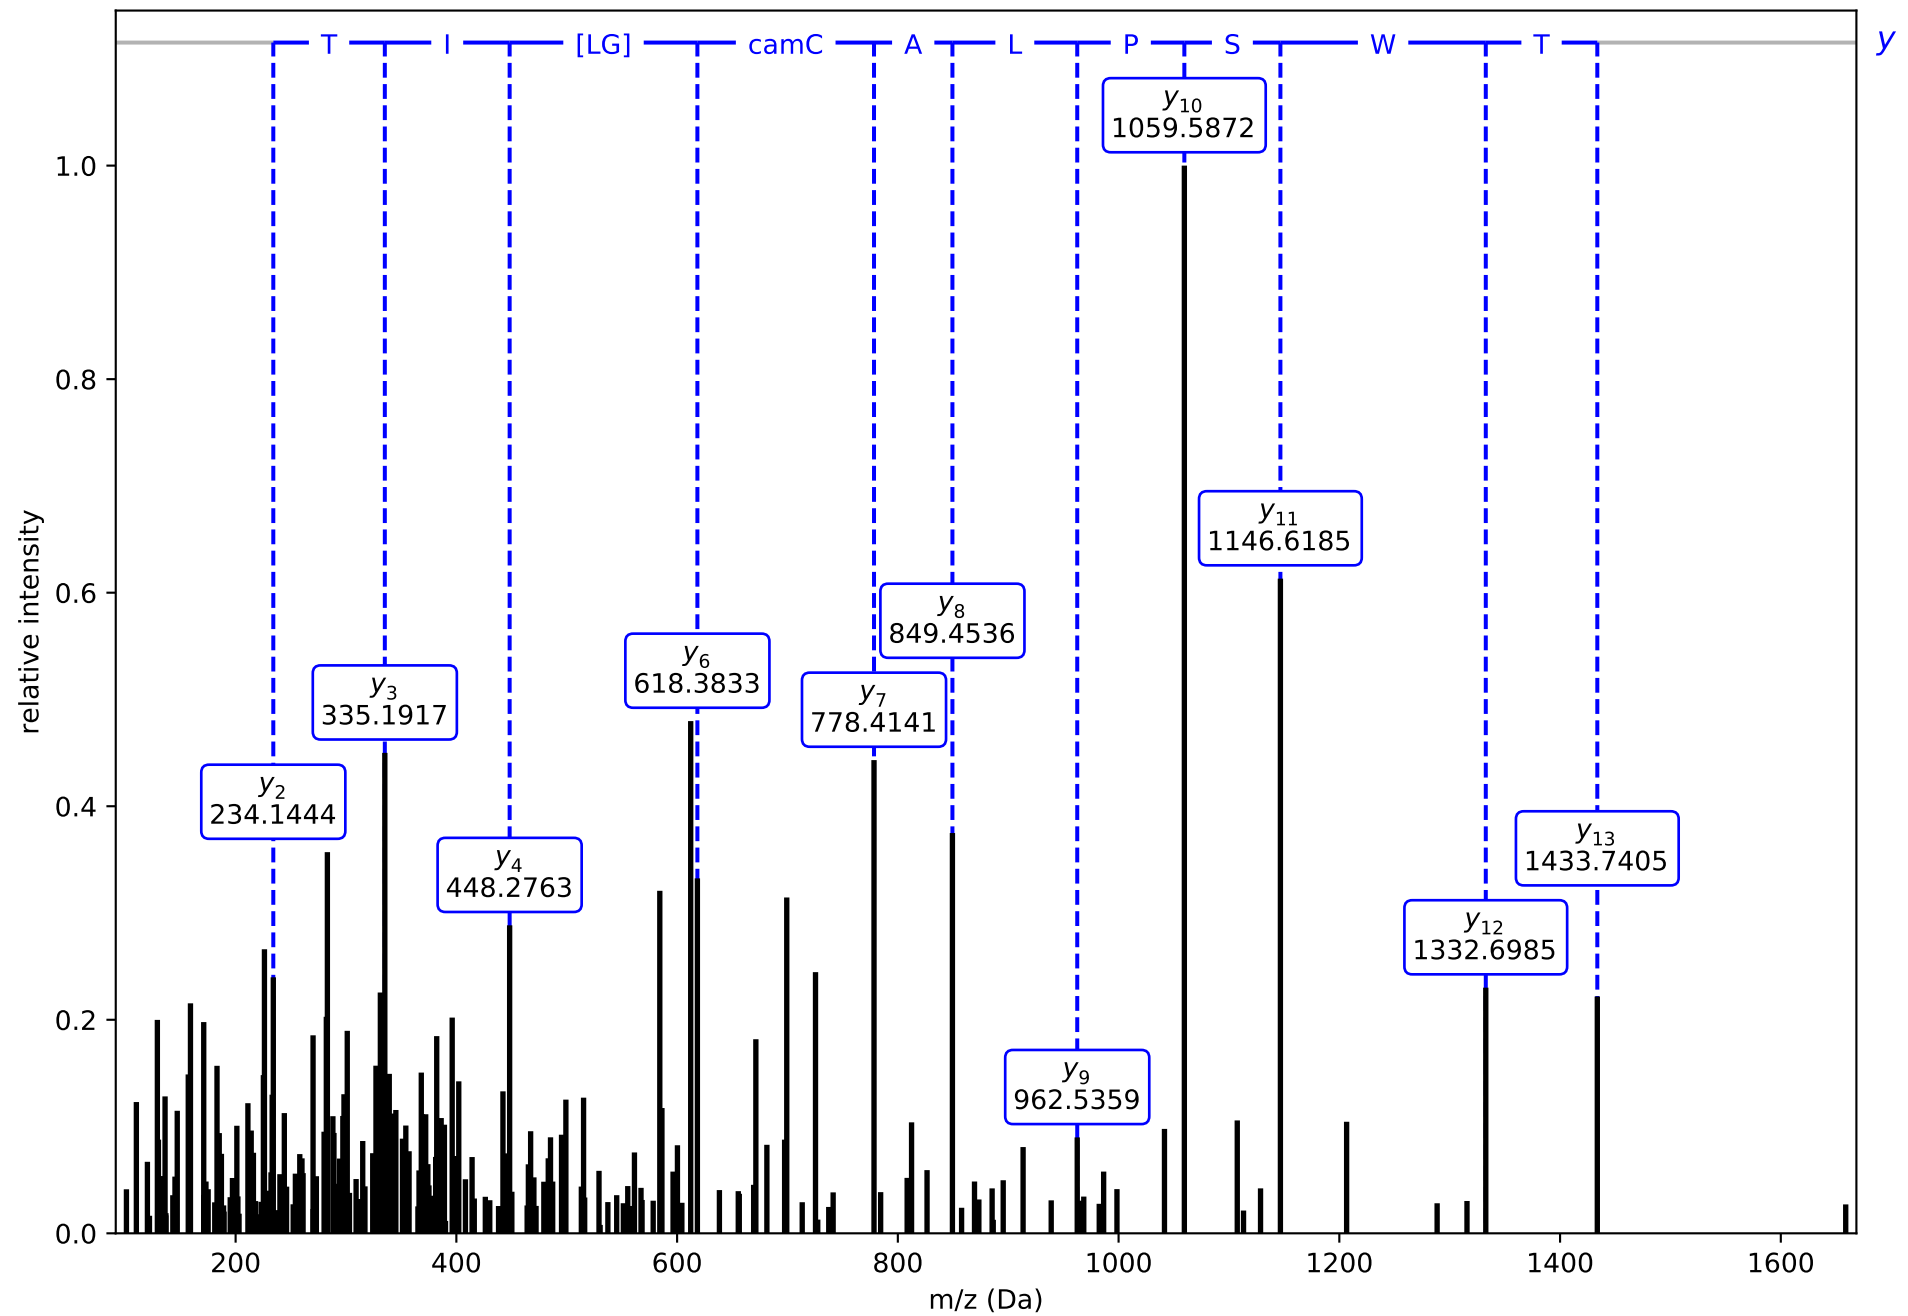

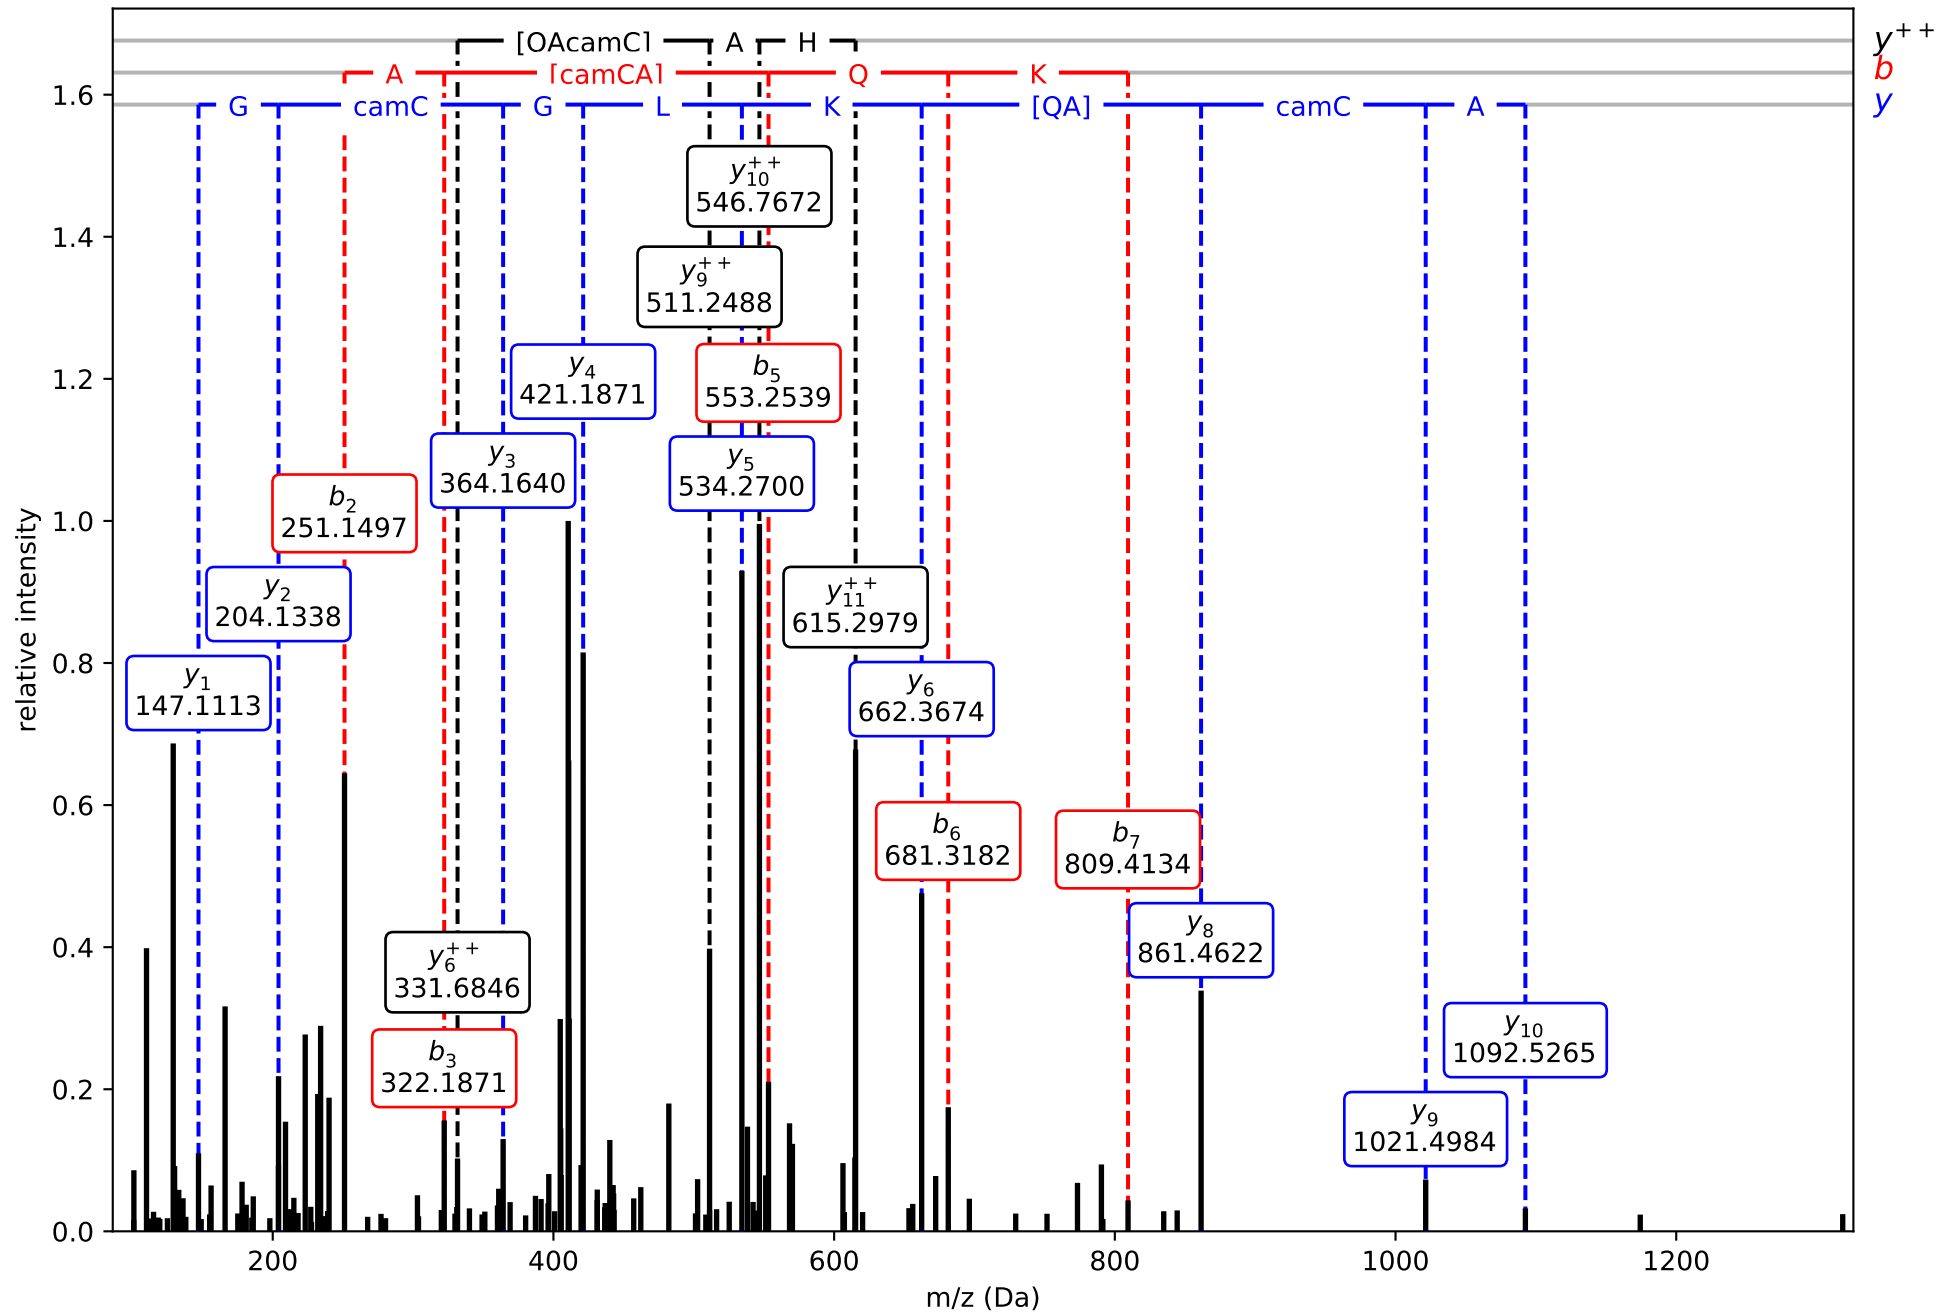



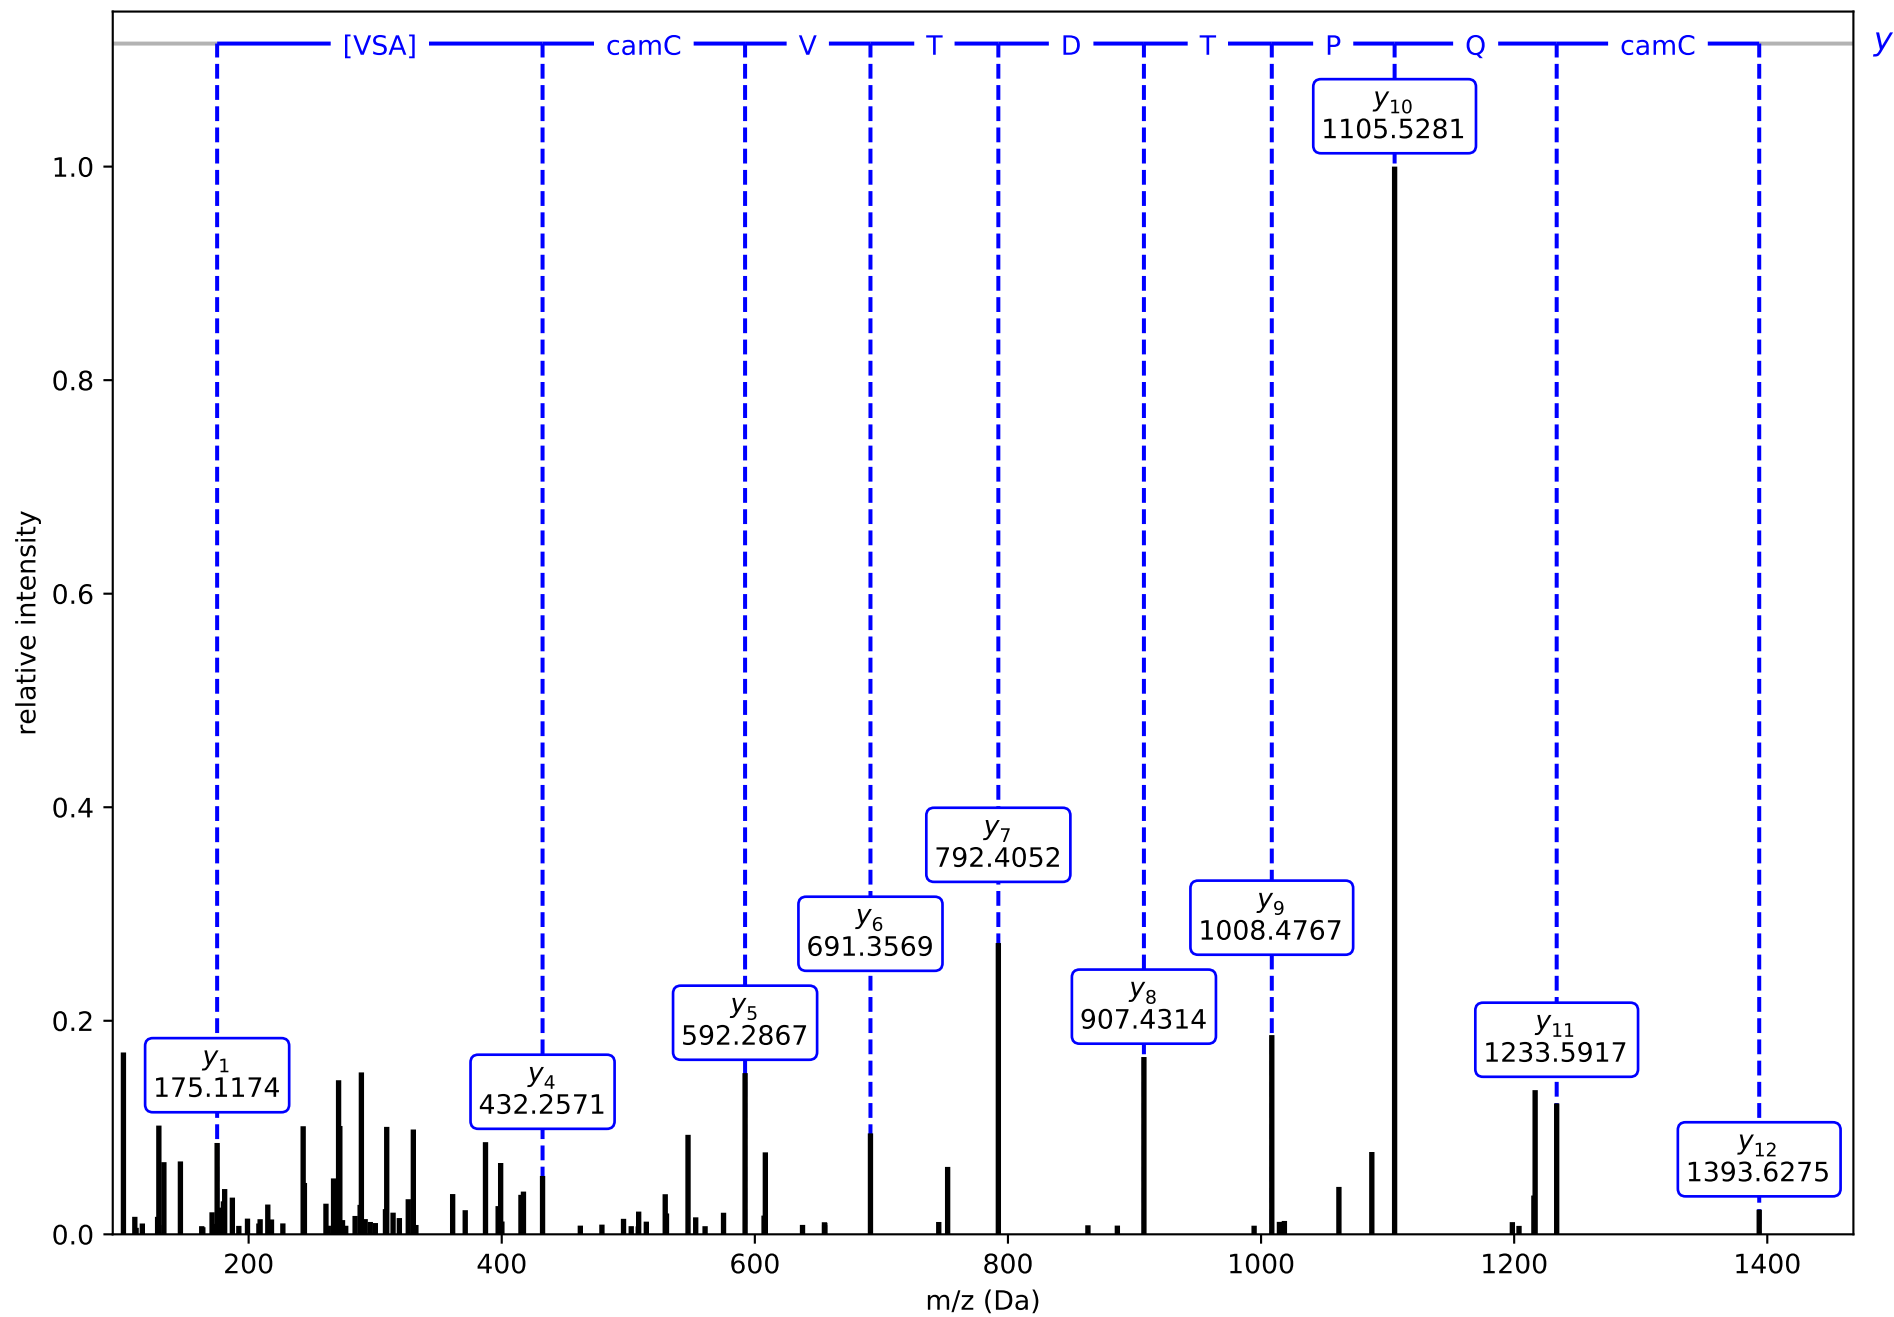

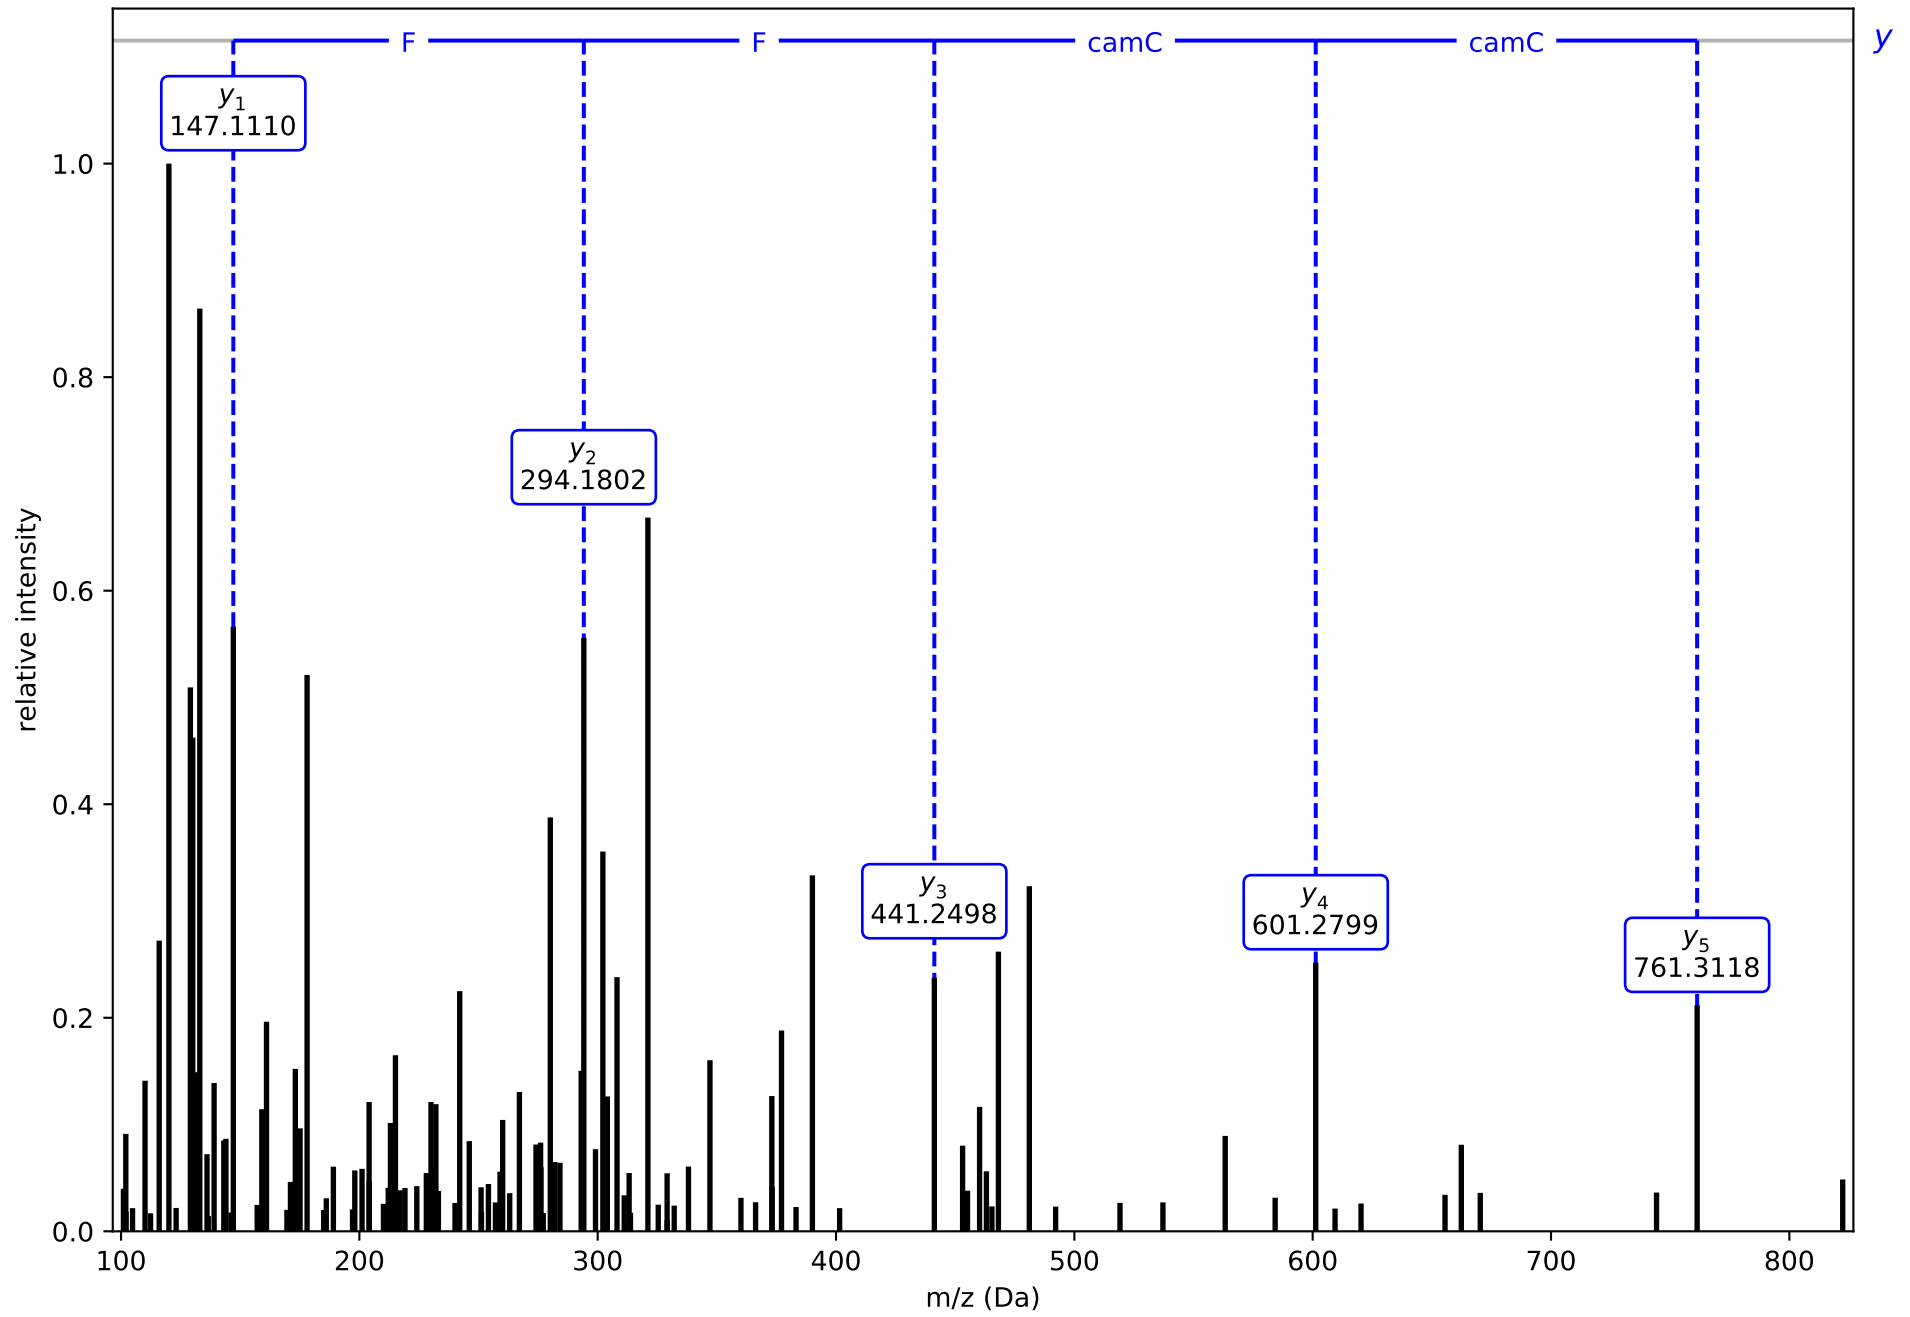

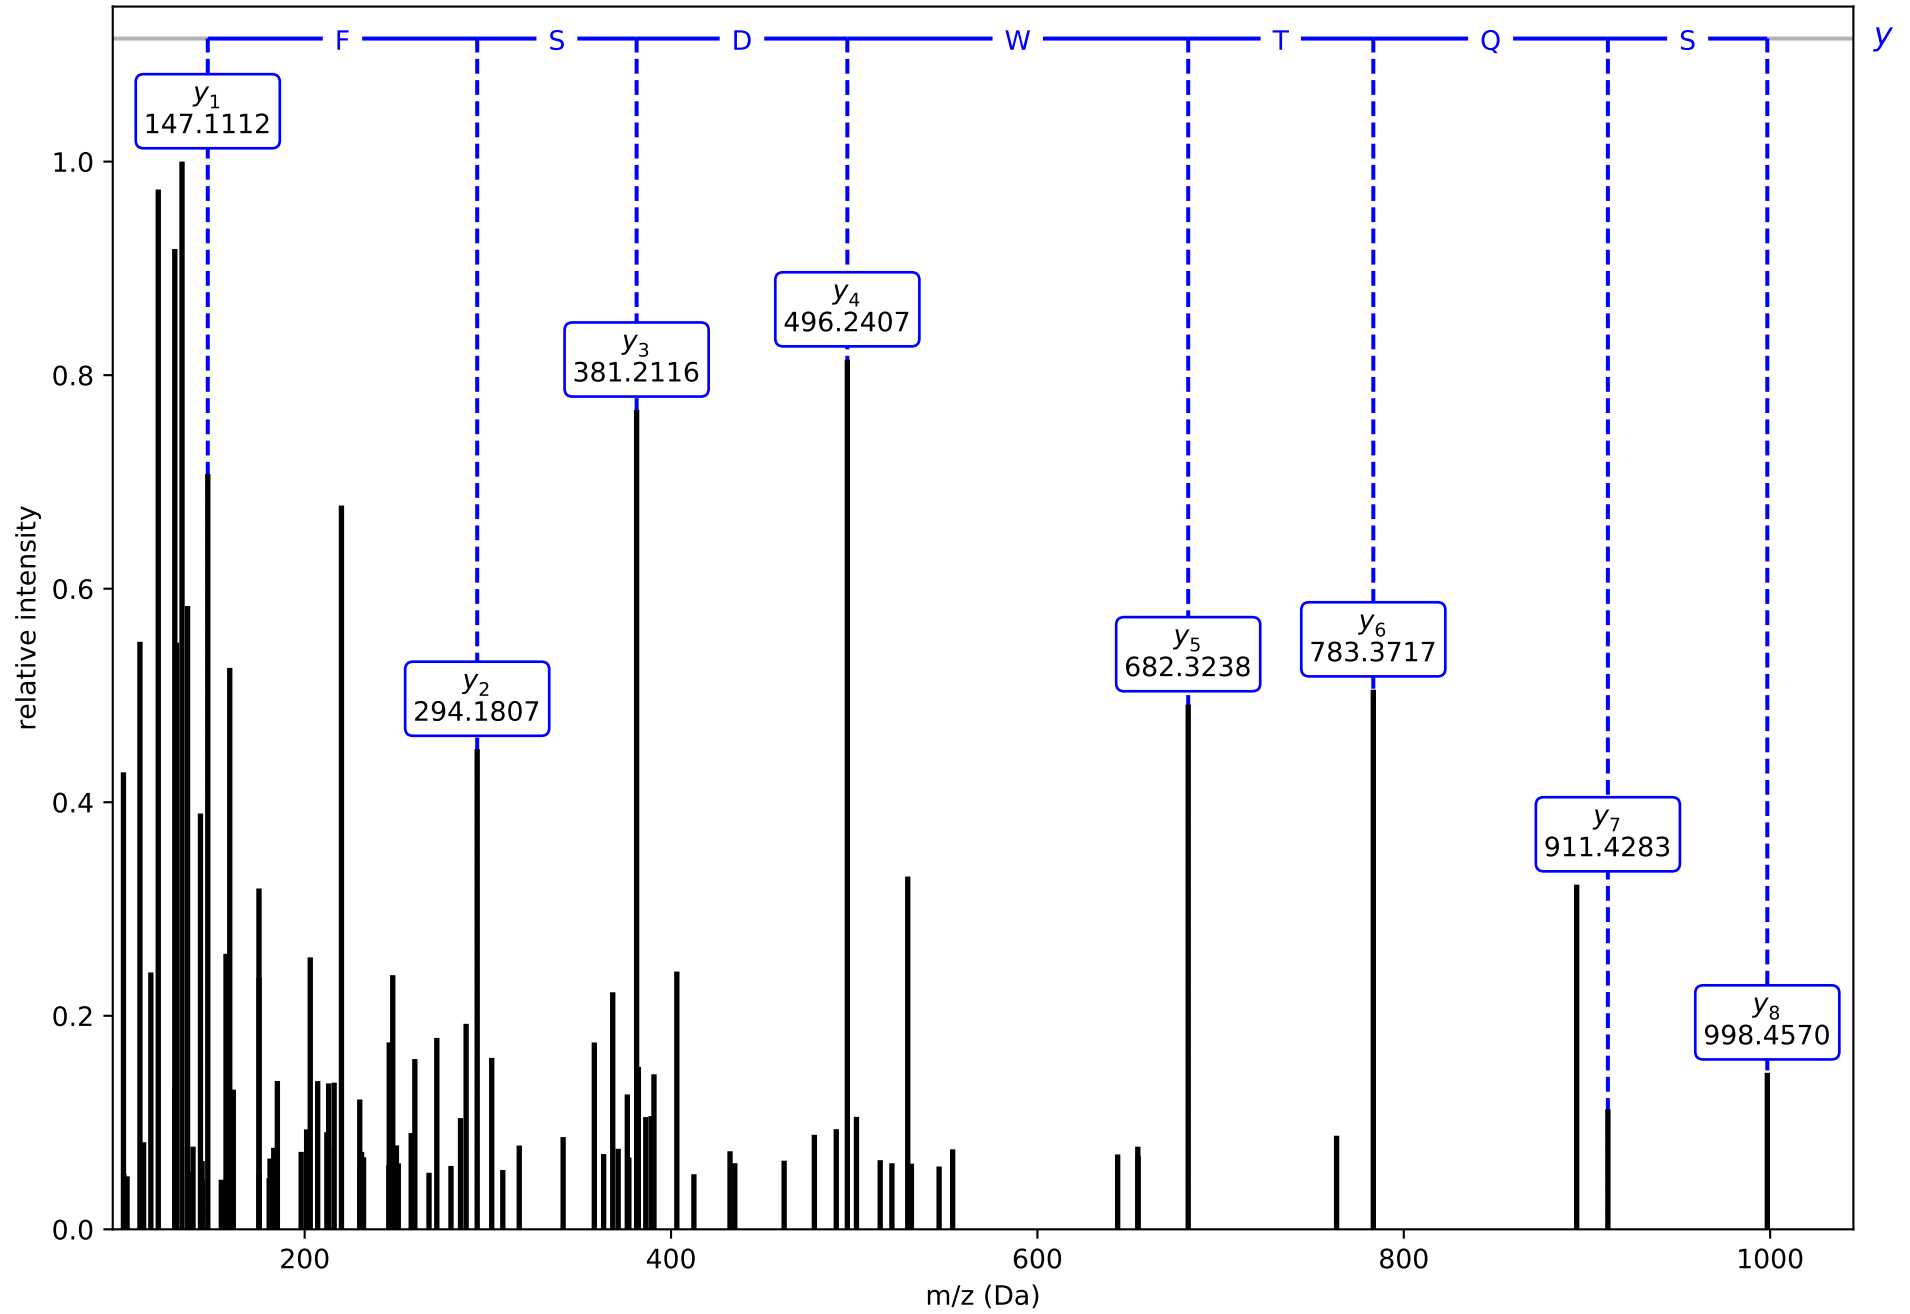

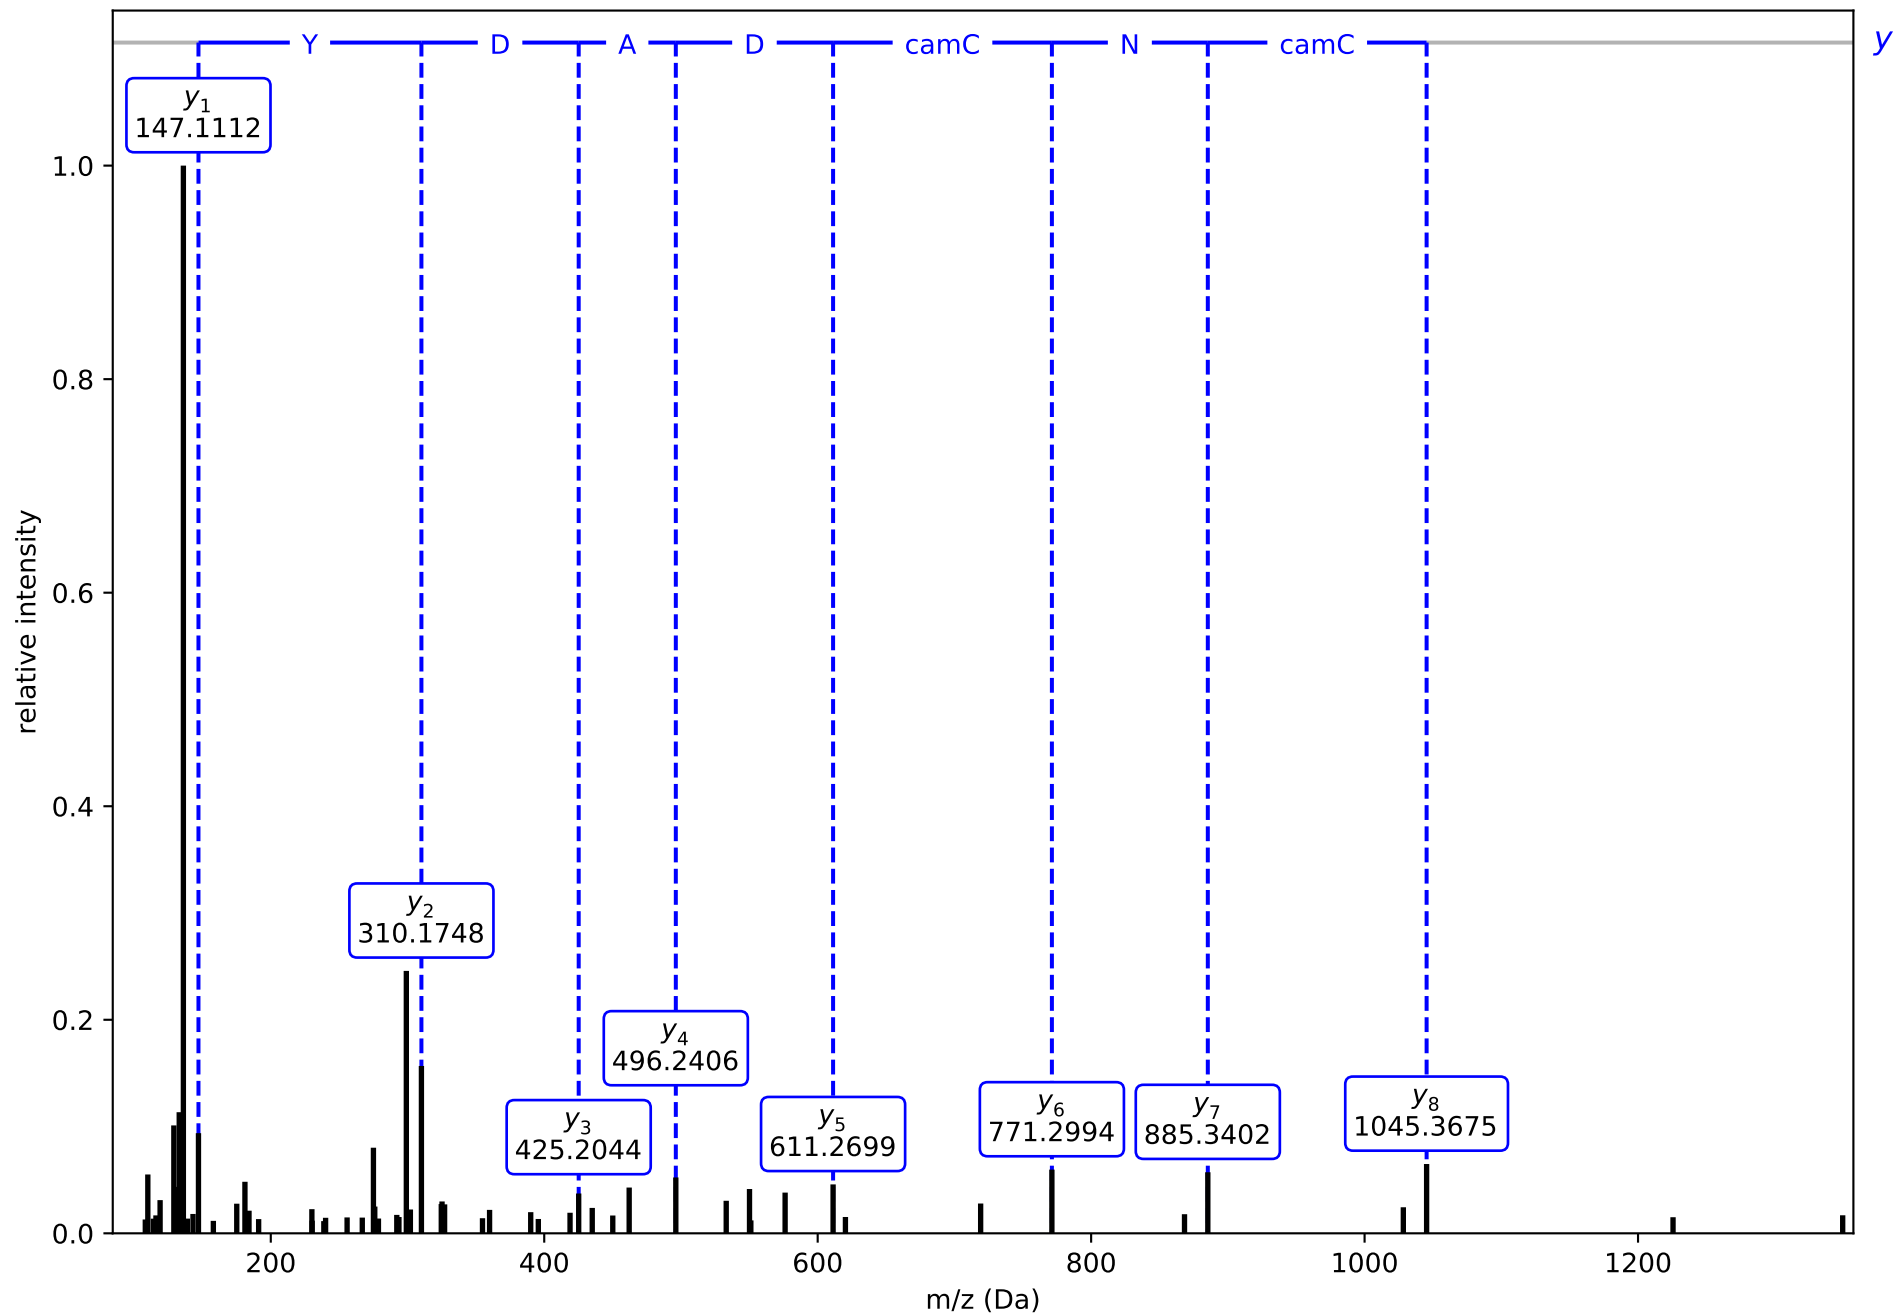

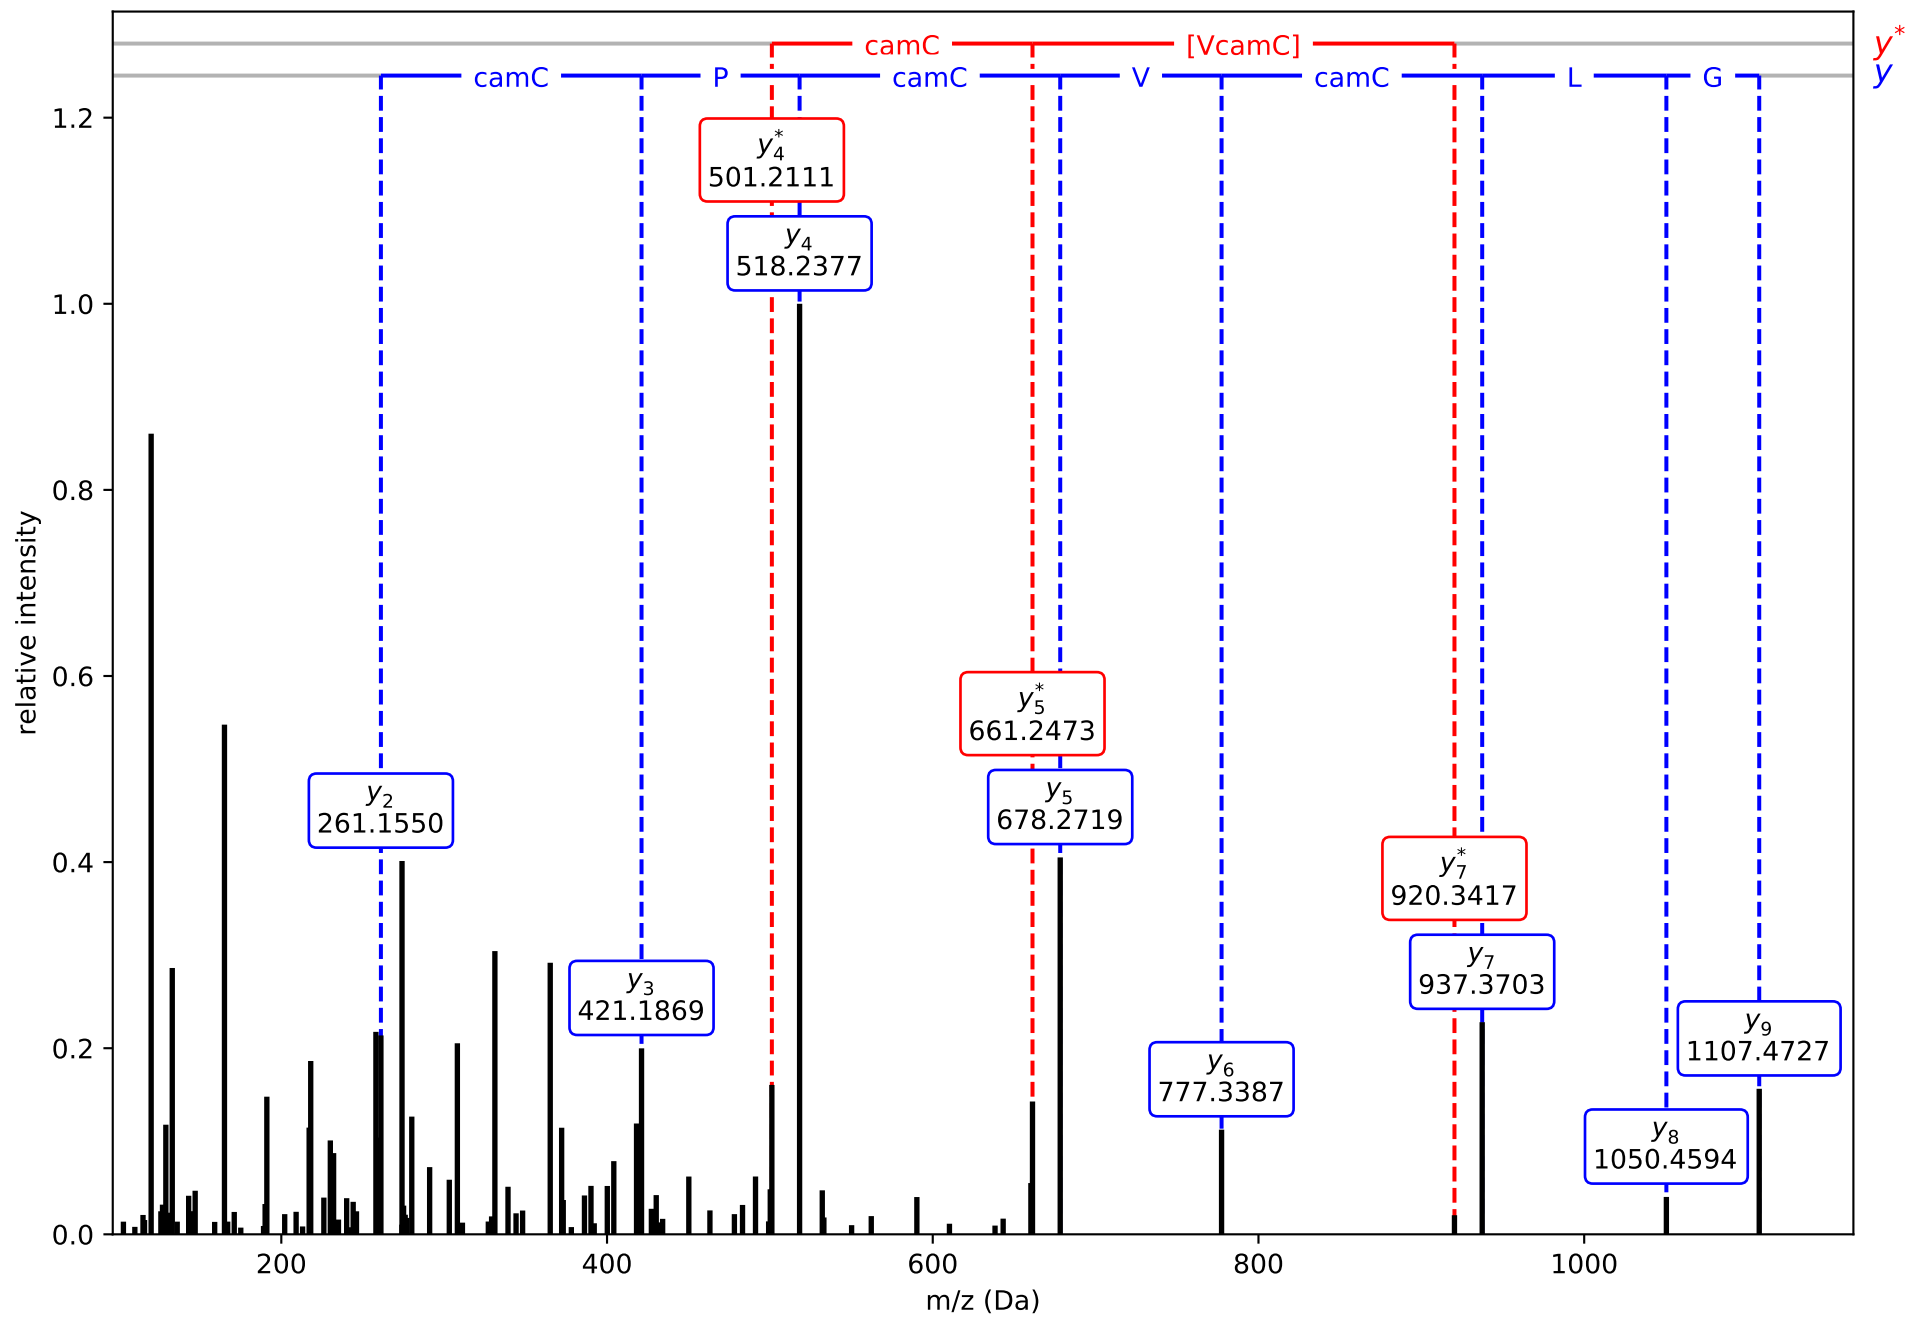

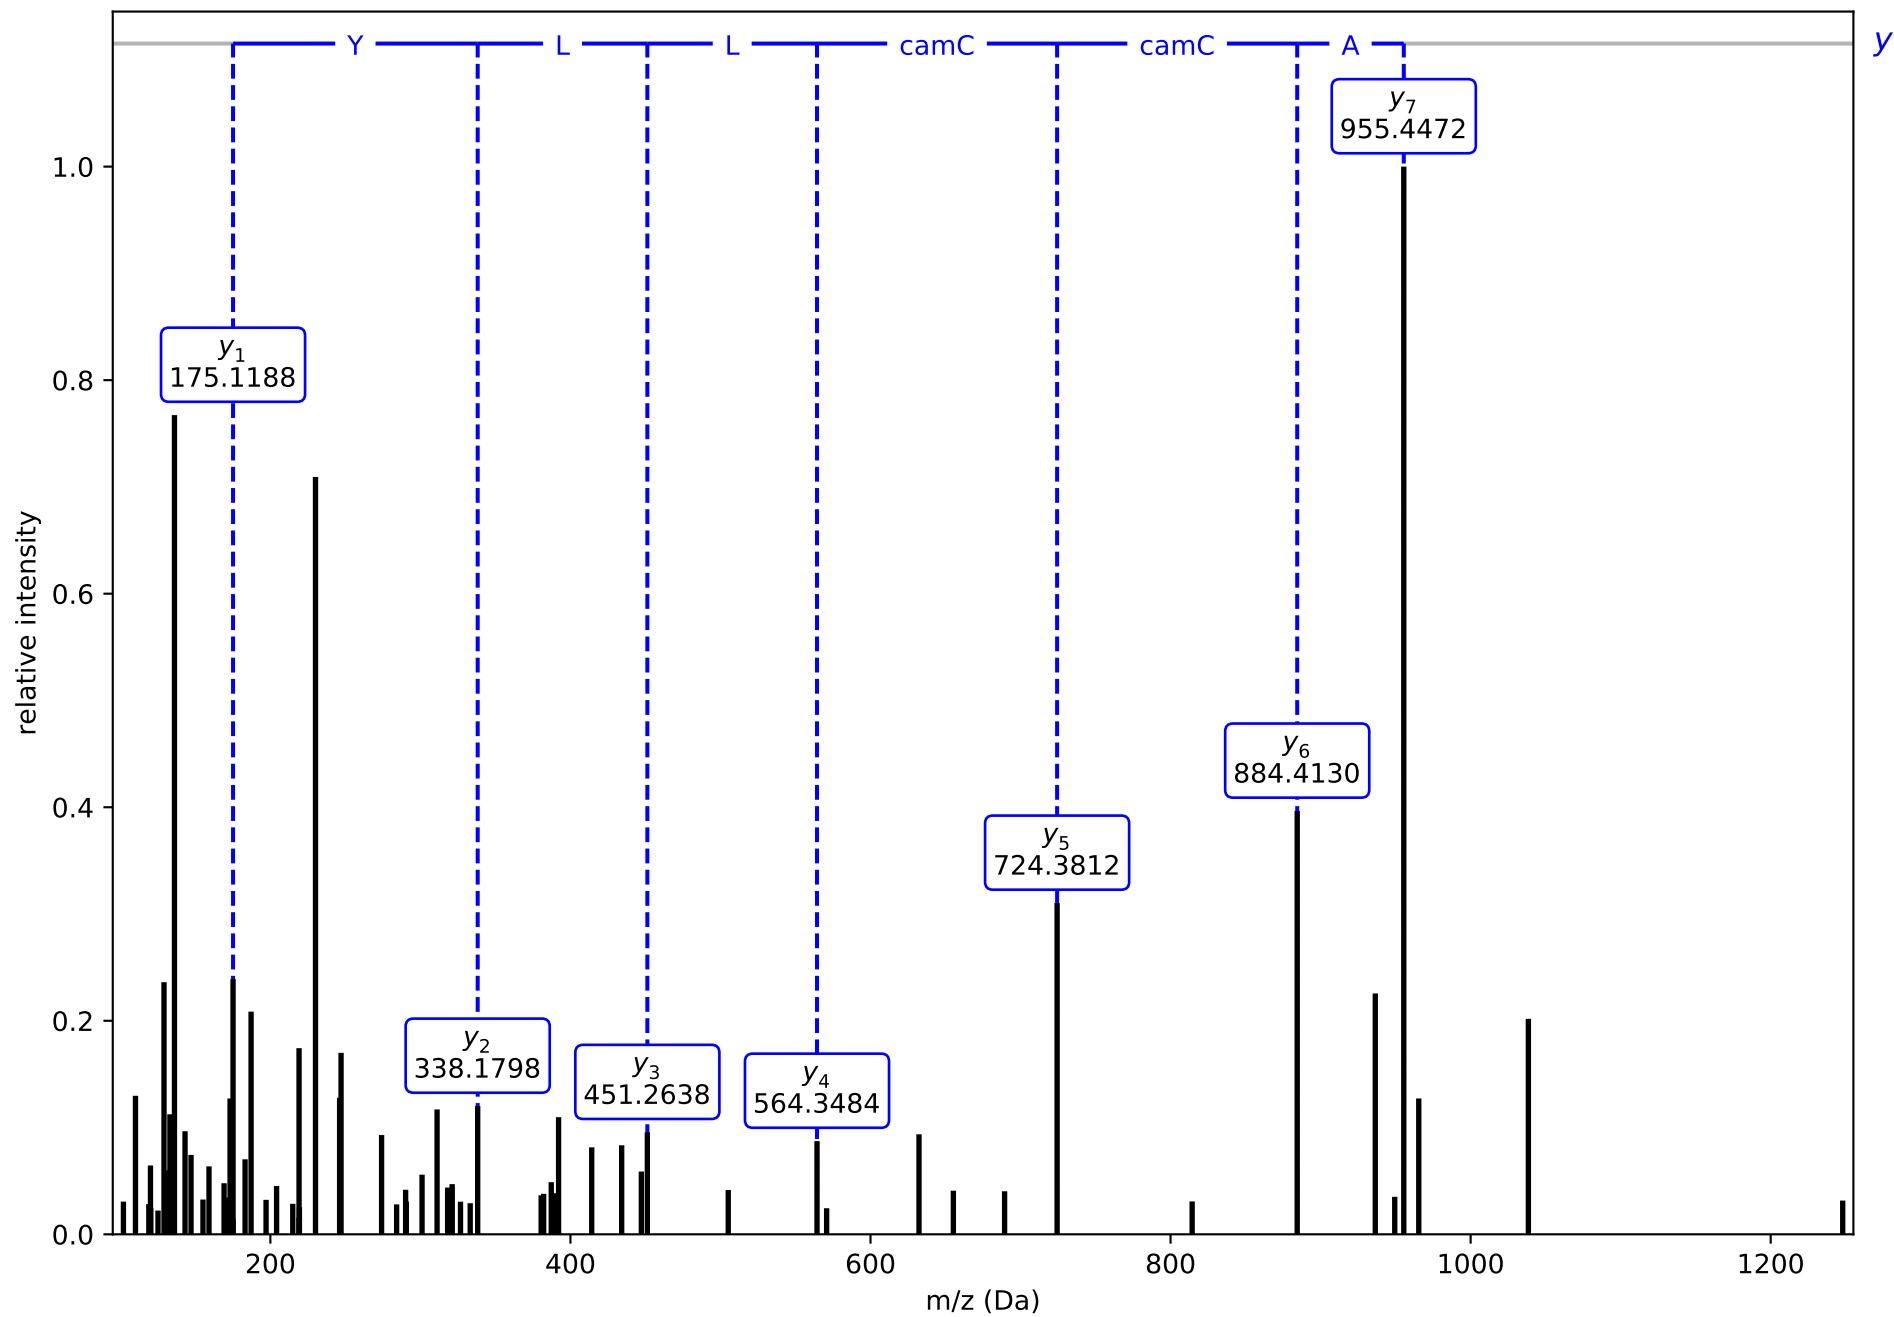

Supplement: 152952_1_supp_362427_p8jjgq.pdf [file 152952_1_supp_362427_p8jjgq.pdf]
