# Supplementary material
Source: PubMed Central journal article supplement (PMC6773552)
Supplement: 152952_1_supp_362422_p4jjzp.pdf [file 152952_1_supp_362422_p4jjzp.pdf]

**Supplemental table S4 Identification of differentially expressed PSDs proteins in control mice and after chronic stress by proteomic approach**

| <b>PROTEIN NAME</b>                               | <b>UniProtID</b> | <b>Q-VALUE</b> | <b>RATIO<br/>CHRONIC<br/>STRESS /<br/>CONTROL</b> | <b>FOLD CHANGE<br/>(RATIO&gt;1=RATIO;<br/>O; &lt;1=1/RATIO)</b> | <b>NUMBER OF<br/>IDENTIFIED<br/>PEPTIDES</b> |
|---------------------------------------------------|------------------|----------------|---------------------------------------------------|-----------------------------------------------------------------|----------------------------------------------|
| Protein SZT2                                      | A2A9C3           | NA             | only in 1                                         | NA                                                              | 2                                            |
| Disks large homolog 4                             | Q62108           | 0.00009        | 0.84                                              | 1.18                                                            | 89                                           |
| Unconventional myosin-Ig                          | Q5SUA5           | 0.00009        | 1.12                                              | 1.12                                                            | 116                                          |
| Heat shock 70 kDa protein 4L                      | P48722           | 0.00010        | 1.12                                              | 1.12                                                            |                                              |
| Unconventional myosin-IId                         | Q5SYD0           | 0.00011        | 1.12                                              | 1.12                                                            |                                              |
| Ras/Rap GTPase-activating protein SynGAP          | F6SEU4           | 0.00009        | 0.86                                              | 1.16                                                            | 128                                          |
| RAS protein activator like-3                      | Q8C2K5           | 0.00010        | 0.87                                              | 1.17                                                            |                                              |
| Probable E3 ubiquitin-protein ligase MID2         | Q9QUS6           | 0.00009        | 1.88                                              | 1.88                                                            | 2                                            |
| Microtubule-associated protein 1B                 | P14873           | 0.00009        | 1.24                                              | 1.24                                                            | 91                                           |
| Platelet-derived growth factor receptor alpha     | P26618           | 0.00010        | 1.24                                              | 1.24                                                            |                                              |
| 60S ribosomal protein L11                         | Q9CXW4           | 0.00009        | 1.64                                              | 1.64                                                            | 2                                            |
| LIM zinc-binding domain-containing Nebulette      | Q9DC07           | 0.00009        | 1.79                                              | 1.79                                                            | 5                                            |
| IQ motif and SEC7 domain-containing protein 2     | Q5DU25           | 0.00009        | 0.81                                              | 1.23                                                            | 60                                           |
| V-type proton ATPase 16 kDa proteolipid subunit   | P63082           | 0.00009        | 0.75                                              | 1.33                                                            | 4                                            |
| Glutamate receptor ionotropic, NMDA 1             | P35438           | 0.00009        | 0.83                                              | 1.21                                                            | 51                                           |
| Microtubule-associated protein 1A                 | Q9QYR6           | 0.00009        | 1.24                                              | 1.24                                                            | 114                                          |
| Brain acid soluble protein 1                      | Q91XV3           | 0.00035        | 1.36                                              | 1.36                                                            | 34                                           |
| 2',3'-cyclic-nucleotide 3'-phosphodiesterase      | P16330           | 0.00041        | 1.12                                              | 1.12                                                            | 171                                          |
| Glutamate receptor ionotropic, NMDA 2A            | P35436           | 0.00069        | 0.80                                              | 1.25                                                            | 45                                           |
| Unconventional myosin-XVIIIa                      | Q9JMH9           | 0.00136        | 1.17                                              | 1.17                                                            | 47                                           |
| SH3 and multiple ankyrin repeat domains protein 2 | Q80Z38           | 0.00142        | 0.82                                              | 1.22                                                            | 57                                           |
| Clathrin heavy chain 1                            | Q68FD5           | 0.00426        | 1.16                                              | 1.16                                                            | 70                                           |
| DnaJ homolog subfamily C member 14                | Q921R4           | 0.00430        | 0.95                                              | 1.06                                                            | 223                                          |
| Epiplakin                                         | Q8R0W0           | 0.00431        | 0.96                                              | 1.07                                                            |                                              |
| Sperm flagellar protein 2                         | Q8C9J3           | 0.00432        | 0.97                                              | 1.08                                                            |                                              |
| Phospholipid-transporting ATPase                  | Q6UQ17           | 0.00433        | 0.98                                              | 1.09                                                            |                                              |

|                                                           |        |         |      |      |     |
|-----------------------------------------------------------|--------|---------|------|------|-----|
| ATP-binding cassette sub-family A member 2                | P41234 | 0.00434 | 0.99 | 1.10 |     |
| Formin-2                                                  | Q9JL04 | 0.00432 | 1.17 | 1.17 | 53  |
| Myelin basic protein                                      | P04370 | 0.00435 | 1.10 | 1.10 | 46  |
| Sorbin and SH3 domain-containing protein 2                | Q3UTJ2 | 0.00467 | 0.86 | 1.17 | 36  |
| Glutamate receptor ionotropic, NMDA 2B                    | Q01097 | 0.00471 | 0.87 | 1.15 | 51  |
| Ethanolamine kinase 1                                     | Q9D4V0 | 0.00472 | 0.88 | 1.16 |     |
| SH3 and multiple ankyrin repeat domains protein 3         | Q4ACU6 | 0.00537 | 0.88 | 1.13 | 105 |
| ERC protein 2                                             | Q6PH08 | 0.00543 | 0.88 | 1.13 | 58  |
| Prolactin-releasing peptide receptor                      | Q6VMN6 | 0.00544 | 0.89 | 1.14 |     |
| 2-oxoglutarate dehydrogenase, mitochondrial               | Q60597 | 0.00560 | 1.18 | 1.18 | 29  |
| MAP kinase-activated protein kinase 5                     | O54992 | 0.00587 | 0.88 | 1.14 | 64  |
| Calcium/calmodulin-dependent protein kinase type 1        | Q8BW96 | 0.00588 | 0.89 | 1.15 |     |
| Serine/threonine-protein kinase H1                        | Q91YA2 | 0.00589 | 0.90 | 1.16 |     |
| Calcium/calmodulin-dependent protein kinase type 1        | Q9QYK9 | 0.00590 | 0.91 | 1.17 |     |
| Maternal embryonic leucine zipper kinase                  | Q61846 | 0.00591 | 0.92 | 1.18 |     |
| Calcium/calmodulin-dependent protein kinase type 1        | Q91YS8 | 0.00592 | 0.93 | 1.19 |     |
| Protein FAM205A                                           | A2APU8 | 0.00593 | 0.94 | 1.20 |     |
| Calcium/calmodulin-dependent protein kinase type II       | P11798 | 0.00594 | 0.95 | 1.21 |     |
| Serine/threonine-protein kinase MRCK beta                 | Q7TT50 | 0.00647 | 1.08 | 1.08 | 62  |
| Rho GTPase-activating protein 25                          | Q8BYW1 | 0.00648 | 1.08 | 1.08 |     |
| Myelin-associated oligodendrocyte basic protein           | Q9D2P8 | 0.00788 | 1.28 | 1.28 | 24  |
| Disks large homolog 3                                     | P70175 | 0.00967 | 0.84 | 1.20 | 31  |
| 1-phosphatidylinositol 4,5-bisphosphate phosphodiesterase | Q9Z1B3 | 0.01044 | 1.18 | 1.18 | 30  |
| Coiled-coil domain-containing protein 82                  | Q6PG04 | 0.01049 | 0.88 | 1.14 | 53  |
| Methionine synthase reductase                             | Q8C1A3 | 0.01050 | 0.89 | 1.15 |     |
| Leucine zipper putative tumor suppressor 3                | A2AHG0 | 0.01051 | 0.70 | 1.45 | 2   |
| Mitochondrial 2-oxoglutarate/malate carrier protein       | Q9CR62 | 0.01226 | 0.83 | 1.21 | 22  |
| Disks large-associated protein 3                          | Q6PFD5 | 0.01522 | 0.80 | 1.25 | 37  |
| ATP synthase subunit beta, mitochondrial                  | P56480 | 0.01656 | 1.15 | 1.15 | 30  |
| Calcium/calmodulin-dependent protein kinase type II       | Q6PHZ2 | 0.02225 | 0.77 | 1.29 | 14  |
| Serine/threonine-protein kinase NIM1                      | Q8BHI9 | 0.02226 | 0.78 | 1.30 |     |
| Tyrosine-protein kinase Fes/Fps                           | P16879 | 0.02227 | 0.79 | 1.31 |     |
| Synaptosomal-associated protein 23                        | O09044 | 0.02245 | 2.55 | 2.55 | 2   |

|                                                     |        |         |      |      |     |
|-----------------------------------------------------|--------|---------|------|------|-----|
| RING finger protein unkempt homolog                 | Q8BL48 | 0.02506 | 0.95 | 1.05 |     |
| Protein bassoon                                     | O88737 | 0.02507 | 0.96 | 1.06 | 301 |
| NUT family member 1                                 | Q8BHP2 | 0.02508 | 0.97 | 1.07 |     |
| Solute carrier family 12 member 2                   | P55012 | 0.02649 | 1.13 | 1.13 | 27  |
| Ubiquitin-protein ligase E3C                        | Q80U95 | 0.02650 | 1.13 | 1.13 |     |
| Rho-associated protein kinase 2                     | P70336 | 0.02651 | 1.13 | 1.13 |     |
| Glutamate receptor 2                                | P23819 | 0.03183 | 0.89 | 1.12 | 39  |
| Neurofibromin                                       | Q04690 | 0.03270 | 1.09 | 1.09 | 54  |
| KIF1-binding protein                                | Q6ZPU9 | 0.03271 | 1.09 | 1.09 |     |
| SUN domain-containing protein 1                     | Q9D666 | 0.04449 | 0.90 | 1.11 | 68  |
| SH3 and multiple ankyrin repeat domains protein 1   | D3YZU1 | 0.04450 | 0.91 | 1.12 |     |
| N-acetyllactosaminide beta-1,3-N-acetylglucosaminyl | Q5JCS9 | 0.04451 | 0.92 | 1.13 |     |
| Erlin-2                                             | Q8BFZ9 | 0.04535 | 0.69 | 1.44 | 5   |
| Erlin-1                                             | Q91X78 | 0.04536 | 0.70 | 1.45 |     |
| 26S proteasome non-ATPase regulatory subunit 4      | O35226 | 0.04540 | 0.78 | 1.29 | 11  |
| Somatotropin                                        | P06880 | 0.04541 | 0.79 | 1.30 |     |
| Glial fibrillary acidic protein                     | P03995 | 0.04557 | 0.87 | 1.15 | 20  |
| Uncharacterized protein C1orf198homolog             | Q8C3W1 | 0.04587 | 1.12 | 1.12 | 7   |
| Dedicator of cytokinesis protein 11                 | A2AF47 | 0.04862 | 1.13 | 1.13 | 28  |
| Neurocalcin-delta                                   | Q91X97 | 0.05610 | 1.28 | 1.28 | 8   |
| Catenin alpha-2                                     | Q61301 | 0.05696 | 0.86 | 1.16 | 32  |
| AP-2 complex subunit beta                           | Q9DBG3 | 0.06825 | 1.18 | 1.18 | 19  |
| Tropomodulin-3                                      | Q9JHJ0 | 0.06868 | 1.12 | 1.12 | 23  |
| X-ray repair cross-complementing protein 6          | P23475 | 0.06869 | 1.12 | 1.12 |     |
| Tropomodulin-2                                      | Q9JKK7 | 0.06870 | 1.12 | 1.12 |     |
| Neural cell adhesion molecule 1                     | P13595 | 0.06868 | 1.13 | 1.13 | 33  |
| Heat shock protein HSP 90-alpha                     | P07901 | 0.06884 | 1.45 | 1.45 | 4   |
| Myocyte-specific enhancer factor 2D                 | Q63943 | 0.06885 | 1.45 | 1.45 |     |
| Ras-specific guanine nucleotide-releasing factor 2  | P70392 | 0.06941 | 1.19 | 1.19 | 20  |
| Actin-binding LIM protein 1                         | Q8K4G5 | 0.07393 | 0.89 | 1.12 | 10  |
| Neurofilament medium polypeptide                    | P08553 | 0.07460 | 1.09 | 1.09 | 64  |
| Claudin-11                                          | Q60771 | 0.07536 | 1.13 | 1.13 | 18  |
| Gap junction alpha-1 protein                        | P23242 | 0.07902 | 0.68 | 1.48 | 4   |

|                                                               |        |         |      |      |    |
|---------------------------------------------------------------|--------|---------|------|------|----|
| Fasciculation and elongation protein zeta-1                   | Q8K0X8 | 0.07973 | 0.60 | 1.66 | 2  |
| Enoyl-CoA hydratase, mitochondrial                            | Q8BH95 | 0.07973 | 0.74 | 1.35 | 14 |
| Probable bifunctional methylenetetrahydrofolate dehydrogenase | D3YZG8 | 0.08230 | 1.08 | 1.08 | 3  |
| WAS/WASL-interacting protein family member 2                  | Q6PEV3 | 0.08298 | 0.71 | 1.40 | 4  |
| WD repeat-containing protein 35                               | Q8BND3 | 0.08667 | 1.18 | 1.18 | 19 |
| Putative per-hexamer repeat protein 4                         | P15974 | 0.08668 | 1.18 | 1.18 |    |
| Major vault protein                                           | Q9EQK5 | 0.08669 | 1.18 | 1.18 |    |
| Amphiphysin                                                   | Q7TQF7 | 0.09523 | 1.21 | 1.21 | 12 |
| Leukemia-associated protein 7 homolog                         | Q8CHZ8 | 0.09987 | 1.11 | 1.11 | 43 |
| Sushi, von Willebrand factor type A, EGF and pentra           | A2AVA0 | 0.09988 | 1.11 | 1.11 |    |
| RasGAP-activating-like protein 1                              | Q9Z268 | 0.09989 | 1.11 | 1.11 |    |
| Neurofascin                                                   | Q810U3 | 0.10078 | 1.14 | 1.14 | 34 |
| Dedicator of cytokinesis protein 1                            | Q8BUR4 | 0.10403 | 1.09 | 1.09 | 61 |
| Dedicator of cytokinesis protein 2                            | Q8C3J5 | 0.10404 | 1.09 | 1.09 |    |
| Contactin-1                                                   | P12960 | 0.10756 | 1.03 | 1.03 | 68 |
| Ankyrin repeat and sterile alpha motif domain-contain         | Q8BIZ1 | 0.10795 | 0.91 | 1.10 | 39 |
| Cytochrome c oxidase subunit NDUF A4                          | Q62425 | 0.10893 | 0.87 | 1.15 | 9  |
| Sideroflexin-5                                                | Q925N0 | 0.11053 | 0.71 | 1.40 | 4  |
| Rho guanine nucleotide exchange factor 2                      | Q60875 | 0.11067 | 1.08 | 1.08 | 37 |
| Disks large homolog 2                                         | Q91XM9 | 0.11225 | 0.91 | 1.10 | 54 |
| Trifunctional enzyme subunit alpha, mitochondrial             | Q8BMS1 | 0.11962 | 1.13 | 1.13 | 15 |
| Choline transporter-like protein 1                            | Q6X893 | 0.12622 | 1.09 | 1.09 | 9  |
| Glutamate receptor ionotropic, NMDA 2D                        | Q03391 | 0.12622 | 0.88 | 1.14 | 18 |
| Catenin beta-1                                                | Q02248 | 0.12979 | 0.90 | 1.12 | 29 |
| Synapsin-1                                                    | O88935 | 0.12992 | 0.92 | 1.08 | 77 |
| Synapsin-2                                                    | O88936 | 0.13038 | 2.24 | 2.24 | 2  |
| Serine/threonine-protein kinase MRCK alpha                    | Q3UU96 | 0.13081 | 1.14 | 1.14 | 22 |
| Alpha-actinin-3                                               | O88990 | 0.13106 | 0.92 | 1.09 | 27 |
| Alpha-actinin-1                                               | Q7TPR4 | 0.13106 | 0.92 | 1.10 |    |
| Protein FAM126B                                               | Q8C729 | 0.13121 | 0.64 | 1.57 | 2  |
| Ectonucleotide pyrophosphatase/phosphodiesterase              | Q8BGN3 | 0.13136 | 1.09 | 1.09 | 38 |
| Actin-binding LIM protein 2                                   | Q8BL65 | 0.13160 | 0.81 | 1.24 | 10 |
| Hippocalcin-like protein 4                                    | Q8BGZ1 | 0.13193 | 1.30 | 1.30 | 5  |

|                                                   |        |         |      |      |    |
|---------------------------------------------------|--------|---------|------|------|----|
| NADH dehydrogenase [ubiquinone] 1 beta subcomp    | Q9D6J5 | 0.13229 | 1.29 | 1.29 | 4  |
| Sorbin and SH3 domain-containing protein 2        | Q62417 | 0.13236 | 0.86 | 1.17 | 8  |
| Microtubule-associated protein 6                  | Q7TSJ2 | 0.13251 | 1.06 | 1.06 | 74 |
| Protein shisa-7                                   | Q8C3Q5 | 0.13251 | 0.81 | 1.23 | 16 |
| Leucine zipper putative tumor suppressor 3        | A2AHG0 | 0.13473 | 2.02 | 2.02 | 2  |
| Septin-6                                          | Q9R1T4 | 0.13724 | 0.94 | 1.07 | 14 |
| Disks large-associated protein 4                  | B1AZP2 | 0.13755 | 0.85 | 1.18 | 22 |
| ATP synthase subunit delta, mitochondrial         | Q9D3D9 | 0.13903 | 1.26 | 1.26 | 9  |
| Hexokinase-1                                      | P17710 | 0.13962 | 0.80 | 1.25 | 22 |
| Nesprin-1                                         | Q6ZWR6 | 0.14104 | 0.93 | 1.07 | 69 |
| IQ motif and SEC7 domain-containing protein 3     | Q3TES0 | 0.14301 | 0.73 | 1.36 | 9  |
| Glutathione peroxidase 1                          | P11352 | 0.14410 | 0.66 | 1.51 | 2  |
| Glutathione peroxidase 2                          | Q9R159 | 0.14600 | 0.91 | 1.10 | 35 |
| Glutathione peroxidase 3                          | Q148W8 | 0.14600 | 0.91 | 1.11 |    |
| Creatine kinase S-type, mitochondrial             | Q6P8J7 | 0.14600 | 0.91 | 1.12 |    |
| Creatine kinase M-type                            | P07310 | 0.14600 | 0.91 | 1.13 |    |
| Creatine kinase U-type, mitochondrial             | P30275 | 0.14600 | 0.91 | 1.14 |    |
| CDGSH iron-sulfur domain-containing protein 1     | Q91WS0 | 0.14786 | 0.68 | 1.46 | 3  |
| Regulating synaptic membrane exocytosis protein 1 | Q99NE5 | 0.15297 | 0.94 | 1.07 | 59 |
| Actin-related protein 2/3 complex                 | Q9JM76 | 0.15484 | 0.68 | 1.48 | 3  |
| SNF-related serine/threonine-protein kinase       | Q8VDU5 | 0.15555 | 1.40 | 1.40 | 2  |
| Glutamate receptor 3                              | Q9Z2W9 | 0.16374 | 0.84 | 1.20 | 21 |
| Heat shock 70 kDa protein 12A                     | Q8K0U4 | 0.17128 | 1.15 | 1.15 | 17 |
| 60S ribosomal protein L17                         | Q9CPR4 | 0.17128 | 0.81 | 1.24 | 4  |
| Cytoskeleton-associated protein 5                 | A2AGT5 | 0.17470 | 1.05 | 1.05 | 74 |
| WD repeat-containing protein 41                   | Q3UDP0 | 0.17476 | 0.70 | 1.43 | 2  |
| Beta-actin-like protein 2                         | Q8BFZ3 | 0.17476 | 0.95 | 1.05 | 52 |
| Actin, alpha skeletal muscle                      | P68134 | 0.17476 | 0.95 | 1.06 |    |
| Actin, alpha cardiac muscle 1                     | P68033 | 0.17476 | 0.95 | 1.07 |    |
| Actin, cytoplasmic 1                              | P60710 | 0.17476 | 0.95 | 1.08 |    |
| Actin, cytoplasmic 2                              | P63260 | 0.17476 | 0.95 | 1.09 |    |
| Actin, aortic smooth muscle                       | P62737 | 0.17476 | 0.95 | 1.10 |    |
| Actin, gamma-enteric smooth muscle                | P63268 | 0.17476 | 0.95 | 1.11 |    |

|                                                                  |         |         |      |      |    |
|------------------------------------------------------------------|---------|---------|------|------|----|
| 60S ribosomal protein L10                                        | Q6Z WV3 | 0.17623 | 0.85 | 1.18 | 6  |
| 60S ribosomal protein L10-like                                   | P86048  | 0.17623 | 0.85 | 1.19 |    |
| Catenin alpha-3                                                  | Q65CL1  | 0.17640 | 1.24 | 1.24 | 16 |
| Serine/threonine-protein kinase MARK2                            | Q05512  | 0.17959 | 0.82 | 1.22 | 16 |
| Centrosomal protein of 170 kDa                                   | Q6A065  | 0.18430 | 1.36 | 1.36 | 3  |
| Centrosomal protein of 170 kDa protein B                         | Q80U49  | 0.18431 | 1.36 | 1.36 |    |
| Protein FAM163B                                                  | Q8BUM6  | 0.19674 | 0.81 | 1.23 | 4  |
| Protein FAM81A                                                   | Q3UXZ6  | 0.19812 | 0.83 | 1.20 | 18 |
| Activity-regulated cytoskeleton-associated protein               | Q9WV31  | 0.20007 | 0.77 | 1.30 | 10 |
| NADH dehydrogenase [ubiquinone] iron-sulfur protein              | Q9DC70  | 0.20007 | 1.40 | 1.40 | 2  |
| Septin-11                                                        | Q8C1B7  | 0.20007 | 0.83 | 1.21 | 17 |
| Myotubularin-related protein 5                                   | Q6ZPE2  | 0.20007 | 1.11 | 1.11 | 29 |
| Zinc finger protein 445                                          | Q8R2V3  | 0.20008 | 1.11 | 1.11 |    |
| Uncharacterized protein C9orf172homolog                          | A2AJA9  | 0.20102 | 0.89 | 1.13 | 28 |
| Mitochondrial glutamate carrier 1                                | Q9D6M3  | 0.20115 | 0.86 | 1.17 | 12 |
| Centromere protein V                                             | Q9CXS4  | 0.20134 | 1.12 | 1.12 | 3  |
| Glutamate receptor ionotropic, desubunit 3 ItA-2                 | Q61625  | 0.20240 | 0.84 | 1.19 | 8  |
| Glutamate receptor ionotropic, desubunit 3 ItA-3                 | Q62077  | 0.20538 | 0.91 | 1.10 | 17 |
| 1-phosphatidylinositol 4,5-bisphosphate phosphodiesterase        | Q8CIH5  | 0.20538 | 0.91 | 1.11 |    |
| ADP/ATP translocase 1                                            | P48962  | 0.20538 | 0.91 | 1.12 |    |
| Mannan-binding lectin serine protease 1                          | P98064  | 0.20538 | 0.91 | 1.13 |    |
| Ras-specific guanine nucleotide-releasing factor 1               | P27671  | 0.20790 | 1.13 | 1.13 | 23 |
| PCI domain-containing protein 2                                  | Q8BFV2  | 0.20791 | 1.13 | 1.13 |    |
| Cell cycle exit and neuronal differentiation protein 1           | Q9JKC6  | 0.20908 | 0.77 | 1.30 | 7  |
| Synaptotagmin-7                                                  | Q9R0N7  | 0.21024 | 1.19 | 1.19 | 23 |
| Iron-sulfur cluster assembly 1 homolog, mitochondria             | Q9D924  | 0.21250 | 0.68 | 1.47 | 3  |
| 40S ribosomal protein S14                                        | P62264  | 0.21277 | 0.81 | 1.24 | 2  |
| EH domain-containing protein 4                                   | Q9EQP2  | 0.21497 | 1.34 | 1.34 | 3  |
| Myelin-associated glycoprotein                                   | P20917  | 0.22692 | 1.10 | 1.10 | 27 |
| Septin-7                                                         | O55131  | 0.22924 | 0.94 | 1.06 | 50 |
| Septin-14                                                        | Q9DA97  | 0.22924 | 0.94 | 1.07 |    |
| Zinc finger homeobox protein 3                                   | Q61329  | 0.22981 | 1.10 | 1.10 | 51 |
| Phosphorylase b kinase regulatory subunit alpha, skeletal muscle | P18826  | 0.22982 | 1.10 | 1.10 |    |

|                                                      |        |         |      |      |    |
|------------------------------------------------------|--------|---------|------|------|----|
| Alpha-internexin                                     | P46660 | 0.22983 | 1.10 | 1.10 |    |
| Dedicator of cytokinesis protein 10                  | Q8BZN6 | 0.23020 | 1.08 | 1.08 | 65 |
| TNF receptor-associated factor 3                     | Q60803 | 0.23206 | 0.92 | 1.09 | 24 |
| 4F2 cell-surface antigen heavy chain                 | P10852 | 0.23297 | 0.55 | 1.81 | 2  |
| Dihydrolipoyl dehydrogenase, mitochondrial           | O08749 | 0.23517 | 0.80 | 1.25 | 7  |
| Syntaxin-1B                                          | P61264 | 0.24971 | 0.79 | 1.26 | 6  |
| Myotubularin-related protein 2                       | Q9Z2D1 | 0.25023 | 1.21 | 1.21 | 9  |
| Homer protein homolog 1                              | Q9Z2Y3 | 0.25301 | 0.87 | 1.15 | 37 |
| Ganglioside-induced differentiation-associated prote | Q8VE33 | 0.26015 | 0.73 | 1.36 | 7  |
| Afadin                                               | Q9QZQ1 | 0.26073 | 0.87 | 1.14 | 12 |
| Leucine-rich repeat transmembraneneuronal protein    | Q8K377 | 0.26132 | 0.78 | 1.28 | 9  |
| Annexin A6                                           | P14824 | 0.26212 | 0.85 | 1.18 | 17 |
| Annexin A4                                           | P97429 | 0.26212 | 0.85 | 1.19 |    |
| Neuroepithelial cell-transforminggene 1 protein      | Q9Z206 | 0.26212 | 0.85 | 1.20 |    |
| Rho guanine nucleotide exchange factor 3             | Q91X46 | 0.26212 | 0.85 | 1.21 |    |
| Core histone macro-H2A,1                             | Q9QZQ8 | 0.26212 | 1.11 | 1.11 | 10 |
| Contactin-associated protein 1                       | O54991 | 0.26453 | 1.09 | 1.09 | 57 |
| PHD finger protein 1                                 | Q9Z1B8 | 0.26454 | 1.09 | 1.09 |    |
| Contactin-2                                          | Q61330 | 0.26761 | 1.08 | 1.08 | 23 |
| Synaptotagmin-3                                      | O35681 | 0.27061 | 1.20 | 1.20 | 19 |
| Synaptotagmin-10                                     | Q9R0N4 | 0.27062 | 1.20 | 1.20 |    |
| Cerebellin-1                                         | Q9R171 | 0.27600 | 0.89 | 1.12 | 8  |
| Lamin-B1                                             | P14733 | 0.27625 | 0.37 | 2.70 | 3  |
| Coiled-coil domain-containing protein 127            | Q3TC33 | 0.27689 | 0.78 | 1.29 | 6  |
| Growth arrest-specific protein 7                     | Q60780 | 0.27689 | 0.84 | 1.20 | 11 |
| F-actin-capping protein subunit alpha-1              | P47753 | 0.27689 | 0.62 | 1.60 | 3  |
| Kinetochore-associated protein 1                     | Q8C3Y4 | 0.27689 | 0.65 | 1.53 | 2  |
| Wiskott-Aldrich syndrome proteinfamily member 3      | Q8VHI6 | 0.27727 | 1.14 | 1.14 | 7  |
| Ras-related protein Rab-3A                           | P63011 | 0.27777 | 0.84 | 1.19 | 4  |
| Complement C1q subcomponent subunit B                | P14106 | 0.27781 | 1.32 | 1.32 | 2  |
| S-phase kinase-associated protein1                   | Q9WTX5 | 0.28554 | 0.74 | 1.35 | 2  |
| Catenin delta-2                                      | O35927 | 0.28554 | 0.88 | 1.14 | 22 |
| Ankyrin-3                                            | G5E8K5 | 0.28635 | 1.06 | 1.06 | 53 |

|                                                              |        |         |      |      |    |
|--------------------------------------------------------------|--------|---------|------|------|----|
| Ankyrin-1                                                    | Q02357 | 0.28636 | 1.06 | 1.06 |    |
| Serine protease HTRA2, mitochondrial                         | Q9JIY5 | 0.28653 | 1.10 | 1.10 | 15 |
| Serine protease HTRA3                                        | Q9D236 | 0.28654 | 1.10 | 1.10 |    |
| Serine protease HTRA4                                        | A2RT60 | 0.28655 | 1.10 | 1.10 |    |
| Serine protease HTRA1                                        | Q9R118 | 0.28656 | 1.10 | 1.10 |    |
| Brain-specific angiogenesis inhibitor 1-associated protein 1 | Q8BKX1 | 0.28714 | 0.90 | 1.11 | 37 |
| Cytoplasmic dynein 1 light intermediate chain 2              | Q6PDL0 | 0.28871 | 1.13 | 1.13 | 11 |
| Neuronal-specific septin-3                                   | Q9Z1S5 | 0.28871 | 0.90 | 1.12 | 26 |
| Putative ATP-dependent RNA helicase DHX33                    | Q80VY9 | 0.29199 | 0.68 | 1.47 | 2  |
| Splicing factor U2AF 35 kDa subunit                          | Q9D883 | 0.29199 | 0.68 | 1.48 |    |
| Potassium voltage-gated channel subfamily A member 1         | P63141 | 0.29524 | 1.25 | 1.25 | 6  |
| Potassium voltage-gated channel subfamily A member 2         | Q61423 | 0.29525 | 1.25 | 1.25 |    |
| Guanine nucleotide-binding protein G(s) subunit alpha 1      | P63094 | 0.29667 | 1.16 | 1.16 | 11 |
| Guanine nucleotide-binding protein G(s) subunit alpha 2      | Q6R0H7 | 0.29668 | 1.16 | 1.16 |    |
| Protein zyg-11 homolog B                                     | Q3UFS0 | 0.29667 | 1.13 | 1.13 | 2  |
| Rabphilin-3A                                                 | P47708 | 0.30051 | 0.87 | 1.15 | 11 |
| Signal-induced proliferation-associated 1-like protein 1     | Q8C0T5 | 0.30051 | 0.89 | 1.12 | 28 |
| Phosphatidylinositol 4-kinase alpha                          | E9Q3L2 | 0.30118 | 1.18 | 1.18 | 17 |
| Glutamate receptor ionotropic, kainate 5                     | Q61626 | 0.30250 | 0.71 | 1.42 | 2  |
| Putative ATP-dependent RNA helicase DHX30                    | Q99PU8 | 0.30553 | 1.08 | 1.08 | 4  |
| Protein kinase C gamma type                                  | P63318 | 0.30616 | 1.07 | 1.07 | 76 |
| Kinesin-like protein KIF2B                                   | Q8C0N1 | 0.30617 | 1.07 | 1.07 |    |
| Potassium voltage-gated channel subfamily A member 3         | P16390 | 0.31150 | 1.25 | 1.25 | 3  |
| Potassium voltage-gated channel subfamily G member 1         | P59053 | 0.31151 | 1.25 | 1.25 |    |
| Potassium voltage-gated channel subfamily V member 1         | Q8BZN2 | 0.31152 | 1.25 | 1.25 |    |
| Potassium voltage-gated channel subfamily B member 1         | A6H8H5 | 0.31153 | 1.25 | 1.25 |    |
| Potassium voltage-gated channel subfamily B member 2         | Q03717 | 0.31154 | 1.25 | 1.25 |    |
| Adhesion G protein-coupled receptor B2                       | Q8CGM1 | 0.31209 | 0.82 | 1.22 | 11 |
| BTB/POZ domain-containing protein KCTD16                     | Q5DTY9 | 0.31733 | 0.83 | 1.20 | 12 |
| Erbin                                                        | Q80TH2 | 0.31788 | 1.12 | 1.12 | 12 |
| CLIP-associating protein 2                                   | Q8BRT1 | 0.31842 | 1.04 | 1.04 | 15 |
| 60S ribosomal protein L21                                    | O09167 | 0.32633 | 0.76 | 1.32 | 4  |
| Calcium/calmodulin-dependent protein kinase type II          | Q923T9 | 0.32633 | 0.90 | 1.11 | 43 |



|                                                                                                |        |         |      |      |    |
|------------------------------------------------------------------------------------------------|--------|---------|------|------|----|
| Calcium/calmodulin-dependent protein kinase type II                                            | P28652 | 0.32633 | 0.90 | 1.12 |    |
| Vacuolar protein sorting-associated protein 53 homolog                                         | Q8CCB4 | 0.32633 | 0.90 | 1.13 |    |
| DnaJ homolog subfamily C member 3                                                              | Q91YW3 | 0.32633 | 0.90 | 1.14 |    |
| TBC1 domain family member 10B                                                                  | Q8BHL3 | 0.32696 | 1.16 | 1.16 | 7  |
| 14-3-3 protein eta                                                                             | P68510 | 0.32696 | 1.30 | 1.30 | 3  |
| 14-3-3 protein eta                                                                             | P68511 | 0.32778 | 1.80 | 1.80 | 2  |
| Voltage-dependent calcium channel gamma-2 subunit                                              | O88602 | 0.32778 | 0.70 | 1.43 | 3  |
| Arf-GAP with GTPase, ANK repeat and PH domain-containing                                       | Q3UHD9 | 0.32825 | 0.89 | 1.12 | 23 |
| BTB/POZ domain-containing protein 10                                                           | Q80X66 | 0.32825 | 0.89 | 1.13 |    |
| TSC22 domain family protein 4                                                                  | Q9EQN3 | 0.32909 | 1.29 | 1.29 | 2  |
| Cytochrome c oxidase subunit 6A1, mitochondrial                                                | P43024 | 0.33227 | 0.90 | 1.11 | 10 |
| Centrosomal protein of 95 kDa                                                                  | Q8BVV7 | 0.33227 | 1.44 | 1.44 | 2  |
| High affinity cAMP-specific and I BMX-insensitive 3',5'-cyclic nucleotide phosphodiesterase 4B | E9Q4S1 | 0.33943 | 1.31 | 1.31 | 3  |
| Glutamate receptor 1                                                                           | P23818 | 0.33943 | 0.90 | 1.11 | 10 |
| Microsomal glutathione S-transferase 3                                                         | Q9CPU4 | 0.33943 | 0.83 | 1.20 | 12 |
| Rho guanine nucleotide exchange factor 33                                                      | Q8BW86 | 0.33943 | 0.93 | 1.08 | 5  |
| Dedicator of cytokinesis protein 5                                                             | B2RY04 | 0.34192 | 1.12 | 1.12 | 26 |
| Conserved oligomeric Golgi complex subunit 1                                                   | Q9Z160 | 0.34193 | 1.12 | 1.12 |    |
| Dihydrolipoyllysine-residue succinyltransferase component                                      | Q9D2G2 | 0.34357 | 1.08 | 1.08 | 11 |
| Microtubule-associated proteins 1                                                              | Q91VR7 | 0.34395 | 1.18 | 1.18 | 6  |
| Microtubule-associated proteins 1A/1B light chain 3B                                           | Q9CQV6 | 0.34396 | 1.18 | 1.18 |    |
| Ras-related C3 botulinum toxin substrate 2                                                     | Q05144 | 0.34437 | 1.05 | 1.05 | 13 |
| Ras-related C3 botulinum toxin substrate 3                                                     | P60764 | 0.34438 | 1.05 | 1.05 |    |
| Ras-related C3 botulinum toxin substrate 1                                                     | P63001 | 0.34439 | 1.05 | 1.05 |    |
| Immunoglobulin-like domain-containing receptor 2                                               | B5TVM2 | 0.35541 | 0.87 | 1.15 | 13 |
| Catenin delta-1                                                                                | P30999 | 0.35541 | 0.83 | 1.20 | 12 |
| Gap junction beta-4 protein                                                                    | Q02738 | 0.35776 | 0.62 | 1.61 | 2  |
| V-type proton ATPase subunit H                                                                 | Q8BVE3 | 0.37032 | 1.09 | 1.09 | 8  |
| ADP/ATP translocase 4                                                                          | Q3V132 | 0.37098 | 0.87 | 1.15 | 18 |
| Protein disulfide-isomerase A4                                                                 | P08003 | 0.37098 | 0.87 | 1.16 |    |
| ADP/ATP translocase 2                                                                          | P51881 | 0.37098 | 0.87 | 1.17 |    |
| Tenascin-R                                                                                     | Q8BYI9 | 0.37098 | 1.05 | 1.05 | 28 |
| 60S acidic ribosomal protein P2                                                                | P99027 | 0.37119 | 0.82 | 1.22 | 8  |

|                                                      |        |         |      |      |    |
|------------------------------------------------------|--------|---------|------|------|----|
| 60S acidic ribosomal protein P3                      | P99028 | 0.37258 | 1.64 | 1.64 | 5  |
| Complement component 1 Q subcomponent-binding        | O35658 | 0.38139 | 1.31 | 1.31 | 6  |
| Arf-GAP with GTPase, ANK repeat and PH domain-c      | Q8BXX8 | 0.38552 | 0.49 | 2.05 | 2  |
| STE20/SPS1-related proline-alanine-rich protein kin  | Q9Z1W9 | 0.39160 | 0.84 | 1.19 | 2  |
| Ezrin                                                | P26040 | 0.39171 | 1.14 | 1.14 | 7  |
| Moesin                                               | P26041 | 0.39172 | 1.14 | 1.14 |    |
| Adhesion G protein-coupled receptor L1               | Q80TR1 | 0.39182 | 0.74 | 1.36 | 3  |
| Copine-6                                             | Q9Z140 | 0.39193 | 0.86 | 1.16 | 12 |
| Proline-rich protein 7                               | Q3V0I2 | 0.39981 | 0.76 | 1.32 | 6  |
| Arf-GAP with GTPase, ANK repeat and PH domain-c      | Q8VHH5 | 0.40761 | 1.00 | 1.00 | 6  |
| Protein EFR3 homolog A                               | Q8BG67 | 0.41149 | 1.17 | 1.17 | 6  |
| Ras-related protein M-Ras                            | O08989 | 0.41342 | 0.77 | 1.30 | 3  |
| Tricarboxylate transport protein, mitochondrial      | Q8JZU2 | 0.41349 | 0.86 | 1.16 | 8  |
| Rho GTPase-activating protein 30                     | Q640N3 | 0.41349 | 0.89 | 1.12 | 16 |
| Rho GTPase-activating protein 33                     | Q80YF9 | 0.41349 | 0.89 | 1.13 |    |
| Rho GTPase-activating protein 32                     | Q811P8 | 0.41349 | 0.89 | 1.14 |    |
| Serine/threonine-protein kinase MARK1                | Q8VHJ5 | 0.41533 | 0.80 | 1.25 | 5  |
| Guanine nucleotide-binding protein G(q) subunit alph | P21279 | 0.41533 | 1.25 | 1.25 | 5  |
| Pleckstrin homology domain-containing family A men   | Q8BUL6 | 0.41533 | 0.87 | 1.14 | 3  |
| Tubulin beta-4A chain                                | Q9D6F9 | 0.41533 | 1.08 | 1.08 | 72 |
| Tubulin beta-2B chain                                | Q9CWF2 | 0.41534 | 1.08 | 1.08 |    |
| Tubulin beta-6 chain                                 | Q922F4 | 0.41535 | 1.08 | 1.08 |    |
| Tubulin beta-2A chain                                | Q7TMM9 | 0.41536 | 1.08 | 1.08 |    |
| Tubulin beta-5 chain                                 | P99024 | 0.41537 | 1.08 | 1.08 |    |
| Tubulin beta-1 chain                                 | A2AQ07 | 0.41538 | 1.08 | 1.08 |    |
| Tubulin beta-4B chain                                | P68372 | 0.41539 | 1.08 | 1.08 |    |
| NADH dehydrogenase [ubiquinone] 1 alpha subcomp      | Q99LC3 | 0.41722 | 1.11 | 1.11 | 15 |
| 40S ribosomal protein S2                             | P25444 | 0.41723 | 0.88 | 1.14 | 6  |
| TOM1-like protein 2                                  | Q5SRX1 | 0.41724 | 1.14 | 1.14 | 7  |
| Stomatin-like protein 2, mitochondrial               | Q99JB2 | 0.41898 | 1.24 | 1.24 | 3  |
| Echinoderm microtubule-associated protein-like 5     | Q8BQM8 | 0.41898 | 0.98 | 1.02 | 7  |
| Tyrosine-protein kinase JAK1                         | P52332 | 0.42432 | 1.23 | 1.23 | 4  |
| Uncharacterized protein C2orf81 homolog              | Q9DAQ4 | 0.42433 | 1.23 | 1.23 |    |

|                                                                   |        |         |      |      |    |
|-------------------------------------------------------------------|--------|---------|------|------|----|
| Junctional protein associated with coronary artery disease        | Q5DTX6 | 0.42436 | 0.70 | 1.44 | 3  |
| Pleckstrin homology domain-containing family H member 1           | Q80T11 | 0.42440 | 1.15 | 1.15 | 4  |
| Guanine nucleotide-binding protein G(k) subunit alpha             | Q9DC51 | 0.42786 | 1.13 | 1.13 | 9  |
| Guanine nucleotide-binding protein G(t) subunit alpha             | Q3V3I2 | 0.42787 | 1.13 | 1.13 |    |
| Guanine nucleotide-binding protein G(i) subunit alpha             | B2RSH2 | 0.42788 | 1.13 | 1.13 |    |
| Guanine nucleotide-binding protein G(t) subunit alpha             | P20612 | 0.42789 | 1.13 | 1.13 |    |
| Cadherin-11                                                       | P55288 | 0.42947 | 0.82 | 1.21 | 2  |
| Neurexin-1-beta                                                   | P0DI97 | 0.42947 | 0.89 | 1.12 | 17 |
| Neurexin-1                                                        | Q9CS84 | 0.42947 | 0.89 | 1.13 |    |
| Transgelin-3                                                      | Q9R1Q8 | 0.43117 | 0.75 | 1.33 | 2  |
| Transgelin-2                                                      | Q9WVA4 | 0.43117 | 0.75 | 1.34 |    |
| Prostasin                                                         | Q9ESD1 | 0.43138 | 1.38 | 1.38 | 2  |
| Transmembrane protein 255B                                        | Q5FW56 | 0.43391 | 1.07 | 1.07 | 27 |
| Myelin-oligodendrocyte glycoprotein                               | Q61885 |         |      |      |    |
| 5'-nucleotidase                                                   | Q61503 | 0.43391 | 1.12 | 1.12 | 15 |
| Guanine nucleotide-binding protein G(I)/G(S)/G(O) subunit gamma-1 | Q61016 | 0.43391 | 1.14 | 1.14 | 3  |
| Receptor-type tyrosine-protein phosphatase delta                  | Q64487 | 0.43453 | 0.87 | 1.15 | 13 |
| Receptor-type tyrosine-protein phosphatase F                      | A2A8L5 | 0.43453 | 0.87 | 1.16 |    |
| Receptor-type tyrosine-protein phosphatase S                      | B0V2N1 | 0.43453 | 0.87 | 1.17 |    |
| Protein phosphatase 1 regulatory subunit 29                       | Q68FM6 | 0.43461 | 0.83 | 1.20 | 7  |
| Zinc finger protein 90                                            | Q61967 | 0.43584 | 0.85 | 1.17 | 14 |
| Liprin-alpha-3                                                    | P60469 | 0.43584 | 0.85 | 1.18 |    |
| Vezatin                                                           | Q3ZK22 | 0.43584 | 0.85 | 1.19 |    |
| Dynein light chain 1, cytoplasmic                                 | P63168 | 0.43584 | 0.95 | 1.05 | 11 |
| Dynein light chain 2, cytoplasmic                                 | Q9D0M5 | 0.43584 | 0.95 | 1.06 |    |
| Voltage-dependent L-type calcium channel subunit beta-1           | Q8CC27 | 0.43584 | 0.91 | 1.09 | 9  |
| Voltage-dependent L-type calcium channel subunit beta-2           | Q8R0S4 | 0.43584 | 0.91 | 1.10 |    |
| PH and SEC7 domain-containing protein 3                           | Q2PFD7 | 0.43619 | 1.01 | 1.01 | 30 |
| Voltage-dependent calcium channel subunit alpha-2A                | Q5RJF7 | 0.43719 | 1.27 | 1.27 | 2  |
| Voltage-dependent calcium channel subunit alpha-2B                | Q9Z1L5 | 0.43720 | 1.27 | 1.27 |    |
| Alpha-adducin                                                     | Q9QYC0 | 0.43783 | 1.10 | 1.10 | 16 |
| 60S ribosomal protein L12                                         | P35979 | 0.44213 | 0.80 | 1.25 | 4  |
| Argininosuccinate synthase                                        | P16460 | 0.44335 | 0.84 | 1.19 | 10 |

|                                                    |        |         |      |      |    |
|----------------------------------------------------|--------|---------|------|------|----|
| Actin-related protein 2/3 complex subunit 1A       | Q9R0Q6 | 0.44346 | 0.83 | 1.20 | 11 |
| Actin-related protein 2/3 complex subunit 1B       | Q9WV32 | 0.44346 | 0.83 | 1.21 |    |
| Noelin                                             | O88998 | 0.44358 | 0.86 | 1.16 | 7  |
| Serine/threonine-protein kinase ULK2               | Q9QY01 | 0.44369 | 1.40 | 1.40 | 2  |
| T-complex protein 1 subunit zeta                   | P80317 | 0.44477 | 1.30 | 1.30 | 2  |
| Sideroflexin-3                                     | Q91V61 | 0.44488 | 0.88 | 1.14 | 11 |
| Prohibitin                                         | P67778 | 0.44778 | 1.12 | 1.12 | 13 |
| Protein kinase C beta type                         | P68404 | 0.44778 | 1.07 | 1.07 | 19 |
| Leucine-rich glioma-inactivated protein 1          | Q9JIA1 | 0.45236 | 1.10 | 1.10 | 16 |
| Exocyst complex component 2                        | Q9D4H1 | 0.45250 | 1.15 | 1.15 | 18 |
| Transitional endoplasmic reticulum ATPase          | Q01853 | 0.46148 | 1.13 | 1.13 | 8  |
| Peroxisredoxin-5, mitochondrial                    | P99029 | 0.46166 | 1.15 | 1.15 | 10 |
| Disks large-associated protein 2                   | Q8BJ42 | 0.46166 | 0.90 | 1.12 | 27 |
| Sprouty-related, EVH1 domain-containing protein 1  | Q924S8 | 0.47399 | 1.13 | 1.13 | 4  |
| Neurologin-3                                       | Q8BYM5 | 0.48141 | 0.76 | 1.32 | 2  |
| EH domain-containing protein 3                     | Q9QXY6 | 0.48141 | 1.16 | 1.16 | 3  |
| Coronin-2B                                         | Q8BH44 | 0.48247 | 0.88 | 1.14 | 11 |
| ATP synthase subunit d, mitochondrial              | Q9DCX2 | 0.48247 | 1.04 | 1.04 | 14 |
| Magnesium transporter MRS2 homolog, mitochondrial  | Q5NCE8 | 0.48277 | 1.19 | 1.19 | 3  |
| Guanine nucleotide-binding protein subunit alpha-1 | P27600 | 0.48277 | 1.20 | 1.20 | 10 |
| ARF GTPase-activating protein GIT                  | Q68FF6 | 0.48277 | 0.92 | 1.09 | 15 |
| ATP-binding cassette sub-family A                  | Q8K440 | 0.48277 | 0.92 | 1.10 |    |
| ATP-binding cassette sub-family Amember 8-A        | Q8K442 | 0.48277 | 0.92 | 1.11 |    |
| ATP-binding cassette sub-family Amember 9          | Q8K449 | 0.48277 | 0.92 | 1.12 |    |
| Beta-Ala-His dipeptidase                           | Q8BUG2 | 0.48277 | 0.92 | 1.13 |    |
| Exocyst complex component 7                        | O35250 | 0.48352 | 1.16 | 1.16 | 6  |
| Metabotropic glutamate receptor 4                  | Q68EF4 | 0.48378 | 0.82 | 1.22 | 3  |
| 60S ribosomal protein L18                          | P35980 | 0.48836 | 0.92 | 1.09 | 5  |
| Eukaryotic translation initiationfactor 4H         | Q9WUK2 | 0.48836 | 1.16 | 1.16 | 2  |
| Acylglycerol kinase, mitochondria                  | Q9ESW4 | 0.48854 | 0.80 | 1.25 | 4  |
| Phospholipase D1                                   | Q9Z280 | 0.48854 | 1.08 | 1.08 | 20 |
| Mitochondrial dicarboxylate carrier                | Q9QZD8 | 0.48854 | 0.88 | 1.14 | 5  |
| Elongation factor 1-alpha 2                        | P62631 | 0.48934 | 1.13 | 1.13 | 23 |

|                                                          |        |         |      |      |    |
|----------------------------------------------------------|--------|---------|------|------|----|
| AP-2 complex subunit alpha-2                             | P17427 | 0.48934 | 1.09 | 1.09 | 23 |
| Ferrochelatase, mitochondrial                            | P22315 | 0.49572 | 1.18 | 1.18 | 2  |
| Voltage-gated potassium channel subunit beta-3           | P97382 | 0.50076 | 1.12 | 1.12 | 20 |
| Voltage-gated potassium channel subunit beta-2           | P62482 | 0.50077 | 1.12 | 1.12 |    |
| Voltage-gated potassium channel subunit beta-1           | P63143 | 0.50078 | 1.12 | 1.12 |    |
| ATPase inhibitor, mitochondrial                          | O35143 | 0.50106 | 1.32 | 1.32 | 9  |
| V-type proton ATPase subunit E 1                         | P50518 | 0.50106 | 1.06 | 1.06 | 9  |
| V-type proton ATPase subunit E 2                         | Q9D593 |         |      |      |    |
| Solute carrier family 2, facilitated glucose transporter | P17809 | 0.50875 | 1.12 | 1.12 | 6  |
| Myosin light polypeptide 6                               | Q60605 | 0.50875 | 1.13 | 1.13 | 6  |
| Transmembrane protein 126A                               | Q9D8Y1 | 0.50875 | 0.97 | 1.03 | 2  |
| Tripeptidyl-peptidase 1                                  | O89023 | 0.50973 | 0.90 | 1.11 | 6  |
| Potassium voltage-gated channel subfamily H memb         | O35219 | 0.50973 | 1.05 | 1.05 | 40 |
| Septin-4                                                 | P28661 |         |      |      |    |
| Exocyst complex component 5                              | Q3TPX4 | 0.50973 | 1.10 | 1.10 | 6  |
| Dynamamin-3                                              | Q8BZ98 | 0.51205 | 1.04 | 1.04 | 20 |
| NADH dehydrogenase [ubiquinone] 1 beta subcompl          | Q3UIU2 | 0.51205 | 0.78 | 1.29 | 3  |
| NADH-cytochrome b5 reductase 3                           | Q9DCN2 | 0.51205 | 0.70 | 1.42 | 3  |
| Mitochondrial pyruvate carrier 2                         | Q9D023 | 0.51529 | 0.79 | 1.26 | 5  |
| NACHT and WD repeat domain-containing protein 2          | Q6P5U7 | 0.51529 | 0.95 | 1.05 | 26 |
| UPF0568 protein C14orf166 homolog                        | Q9CQE8 | 0.51529 | 0.83 | 1.20 | 5  |
| Prohibitin-2                                             | O35129 | 0.52197 | 1.14 | 1.14 | 12 |
| Protein scribble homolog                                 | Q80U72 | 0.52265 | 1.19 | 1.19 | 3  |
| Leucine-rich repeat-containing protein 1                 | Q80VQ1 |         |      |      |    |
| Prickle-like protein 3                                   | Q80VL3 | 0.52265 | 0.77 | 1.30 | 4  |
| Prickle-like protein 2                                   | Q80Y24 |         |      |      |    |
| Ras and Rab interactor 2                                 | Q9D684 | 0.52332 | 1.34 | 1.34 | 2  |
| Tyrosine-protein kinase Yes                              | Q04736 | 0.52333 | 1.34 | 1.34 |    |
| Fibroblast growth factor receptor 3                      | Q61851 | 0.52334 | 1.34 | 1.34 |    |
| Cyclin-dependent kinase 20                               | Q9JHU3 | 0.52335 | 1.34 | 1.34 |    |
| Fibroblast growth factor receptor 2                      | P21803 | 0.52336 | 1.34 | 1.34 |    |
| Fibroblast growth factor receptor 1                      | P16092 | 0.52337 | 1.34 | 1.34 |    |
| Fibroblast growth factor receptor4                       | Q03142 | 0.52338 | 1.34 | 1.34 |    |

|                                     |        |         |      |      |    |
|-------------------------------------|--------|---------|------|------|----|
| Serine/threonine-protein kinase MAK | Q04859 | 0.52339 | 1.34 | 1.34 |    |
| Tyrosine-protein kinase Blk         | P16277 | 0.52340 | 1.34 | 1.34 |    |
| Leukocyte surface antigen CD47      | Q61735 | 0.52332 | 1.07 | 1.07 | 8  |
| NADH-ubiquinone oxidoreductase ch   | P03911 | 0.52986 | 0.85 | 1.18 | 6  |
| Vacuolar protein sorting-associat   | Q91W86 | 0.53223 | 1.13 | 1.13 | 5  |
| D-beta-hydroxybutyrate dehydrogen   | Q80XN0 | 0.53283 | 0.86 | 1.16 | 3  |
| Ras-related protein Rap-1A          | P62835 | 0.53283 | 1.13 | 1.13 | 9  |
| Ras-related protein Rap-1b          | Q99J16 |         |      |      |    |
| Amine oxidase [flavin-containing]   | Q8BW75 | 0.53925 | 0.83 | 1.21 | 3  |
| T-cell ecto-ADP-ribosyltransferas   | O35975 | 0.54971 | 1.16 | 1.16 | 2  |
| Rab11 family-interacting protein    | Q8R361 | 0.55423 | 1.18 | 1.18 | 3  |
| C-terminal-binding protein 1        | O88712 | 0.55423 | 1.03 | 1.03 | 3  |
| C-terminal-binding protein 2        | P56546 |         |      |      |    |
| Ras-related protein Rab-35          | Q6PHN9 | 0.55467 | 1.12 | 1.12 | 15 |
| Serine/threonine-protein kinase T   | Q8BYC6 | 0.55467 | 1.10 | 1.10 | 5  |
| Actin-related protein 2/3 complex   | Q9D898 | 0.56090 | 1.13 | 1.13 | 3  |
| V-type proton ATPase catalytic su   | P50516 | 0.56459 | 1.06 | 1.06 | 16 |
| Metabotropic glutamate receptor 6   | Q5NCH9 |         |      |      |    |
| G protein-regulated inducer of ne   | Q3UNH4 | 0.56459 | 0.87 | 1.15 | 5  |
| ATP synthase subunit alpha, mitoc   | Q03265 | 0.56459 | 1.09 | 1.09 | 38 |
| Rab GDP dissociation inhibitor be   | Q61598 | 0.56459 | 1.21 | 1.21 | 3  |
| Lymphocyte antigen 6H               | Q9WUC3 | 0.56531 | 1.22 | 1.22 | 2  |
| GTPase Era, mitochondrial           | Q9CZU4 | 0.56531 | 0.79 | 1.27 | 2  |
| Mitochondrial fission factor        | Q6PCP5 | 0.56531 | 0.67 | 1.48 | 2  |
| Sickle tail protein                 | A2AQ25 | 0.56567 | 0.94 | 1.06 | 34 |
| 40S ribosomal protein S3a           | P97351 | 0.56567 | 0.91 | 1.10 | 4  |
| Putative mitochondrial import inn   | Q4FZG7 | 0.56672 | 1.14 | 1.14 | 4  |
| Mitochondrial import inner membra   | Q9WVA2 |         |      |      |    |
| Ephexin-1                           | Q8CHT1 | 0.56709 | 1.19 | 1.19 | 5  |
| Plasma membrane calcium-transport   | G5E829 | 0.56775 | 0.85 | 1.18 | 4  |
| Plasma membrane calcium-transport   | Q6Q477 |         |      |      |    |
| Neuronal growth regulator 1         | Q80Z24 | 0.56780 | 1.08 | 1.08 | 8  |
| AP-1 complex subunit beta-1         | O35643 | 0.56780 | 1.15 | 1.15 | 9  |

|                                   |        |         |      |      |     |
|-----------------------------------|--------|---------|------|------|-----|
| G-protein coupled receptor family | Q8K3J9 |         |      |      |     |
| cAMP-dependent protein kinase cat | P68181 | 0.56780 | 1.20 | 1.20 | 5   |
| Cytochrome c oxidase subunit 5A,  | P12787 | 0.56926 | 1.10 | 1.10 | 19  |
| DnaJ homolog subfamily A member 1 | P63037 | 0.58501 | 0.90 | 1.12 | 10  |
| OCIA domain-containing protein 2  | Q9D8W7 | 0.59081 | 0.81 | 1.23 | 3   |
| Cytoplasmic dynein 1 heavy chain  | Q9JHU4 | 0.59673 | 1.05 | 1.05 | 107 |
| Myeloid-associated differentiatio | O35682 | 0.59673 | 0.80 | 1.25 | 5   |
| Alpha-enolase                     | P17182 | 0.59868 | 1.15 | 1.15 | 7   |
| Beta-enolase                      | P21550 |         |      |      |     |
| DnaJ homolog subfamily C member 1 | Q5U458 | 0.60435 | 1.06 | 1.06 | 2   |
| Guanine nucleotide-binding protei | P18872 | 0.60626 | 1.07 | 1.07 | 18  |
| Exocyst complex component 6B      | A6H5Z3 | 0.60817 | 1.13 | 1.13 | 10  |
| Metaxin-2                         | O88441 | 0.61194 | 1.18 | 1.18 | 7   |
| V-type proton ATPase 116 kDa subu | Q920R6 | 0.61194 | 0.96 | 1.04 | 26  |
| Cardiomyopathy-associated protein | Q70KF4 |         |      |      |     |
| V-type proton ATPase 116 kDa subu | P15920 |         |      |      |     |
| V-type proton ATPase 116 kDa subu | Q9Z1G4 |         |      |      |     |
| RAS guanyl-releasing protein 1    | Q9Z1S3 | 0.62116 | 0.77 | 1.30 | 2   |
| Coiled-coil domain-containing pro | Q4QRL3 | 0.62117 | 1.07 | 1.07 | 28  |
| Calpain-5                         | O08688 |         |      |      |     |
| Monocyte differentiation antigen  | P10810 |         |      |      |     |
| Small G protein signaling modulat | Q80U12 |         |      |      |     |
| Small G protein signaling modulat | Q8BPQ7 |         |      |      |     |
| 60S ribosomal protein L8          | P62918 | 0.62117 | 0.91 | 1.09 | 8   |
| Flotillin-1                       | O08917 | 0.62118 | 0.93 | 1.07 | 14  |
| Mitochondrial coenzyme A transpor | Q8R0Y8 | 0.62118 | 1.21 | 1.21 | 2   |
| Protein furry homolog             | E9Q8I9 | 0.62120 | 1.10 | 1.10 | 17  |
| General transcription factor 3C p | Q8K284 |         |      |      |     |
| Splicing factor, suppressor of wh | Q3USH5 | 0.62120 | 1.12 | 1.12 | 14  |
| Disheveled-associated activator o | Q80U19 |         |      |      |     |
| Tight junction protein ZO-3       | Q9QXY1 | 0.62120 | 1.15 | 1.15 | 28  |
| Tight junction protein ZO-2       | Q9Z0U1 |         |      |      |     |
| 40S ribosomal protein S20         | P60867 | 0.62300 | 0.93 | 1.08 | 4   |

|                                   |        |         |      |      |    |
|-----------------------------------|--------|---------|------|------|----|
| Carboxypeptidase M                | Q80V42 | 0.62836 | 1.03 | 1.03 | 26 |
| ATP-binding cassette sub-family E | P61222 | 0.62836 | 0.87 | 1.15 | 3  |
| Reticulon-4                       | Q99P72 | 0.63012 | 1.11 | 1.11 | 13 |
| IST1 homolog                      | Q9CX00 | 0.63187 | 1.11 | 1.11 | 2  |
| Dedicator of cytokinesis protein  | P59764 | 0.63700 | 1.12 | 1.12 | 12 |
| Gamma-adducin                     | Q9QYB5 | 0.63700 | 0.88 | 1.13 | 10 |
| Glyceraldehyde-3-phosphate dehydr | P16858 | 0.63708 | 0.94 | 1.06 | 20 |
| Glyceraldehyde-3-phosphate dehydr | Q64467 |         |      |      |    |
| Guanine nucleotide-binding protei | Q8CGK7 | 0.63708 | 1.12 | 1.12 | 5  |
| Guanine nucleotide-binding protei | O70443 | 0.63716 | 1.19 | 1.19 | 14 |
| Dual specificity mitogen-activate | Q8CE90 | 0.64220 | 0.88 | 1.14 | 3  |
| Jerky protein                     | Q60976 | 0.64388 | 1.02 | 1.02 | 5  |
| Pleckstrin homology domain-contai | Q9QYE9 |         |      |      |    |
| Leucine-rich repeat transmembrane | Q80XG9 | 0.64543 | 0.86 | 1.16 | 5  |
| Dual specificity protein phosphat | Q8R4V2 | 0.64543 | 1.09 | 1.09 | 14 |
| Glia-derived nexin                | Q07235 | 0.64556 | 1.14 | 1.14 | 4  |
| Serpin B12                        | Q9D7P9 |         |      |      |    |
| NADH dehydrogenase [ubiquinone] 1 | Q9CQC7 | 0.64709 | 0.82 | 1.22 | 5  |
| Protein kinase C and casein kinas | Q99JB8 | 0.65023 | 1.07 | 1.07 | 9  |
| Neurologin 4-like                 | B0F2B4 | 0.65023 | 0.70 | 1.42 | 2  |
| Neurologin-2                      | Q69ZK9 |         |      |      |    |
| Protein 4,1                       | P48193 | 0.65038 | 0.89 | 1.12 | 6  |
| Band 4,1-like protein 1           | Q9Z2H5 |         |      |      |    |
| 40S ribosomal protein S3          | P62908 | 0.65038 | 0.89 | 1.13 | 7  |
| 4-aminobutyrate aminotransferase, | P61922 | 0.65186 | 1.19 | 1.19 | 3  |
| LanC-like protein 1               | O89112 | 0.65686 | 0.84 | 1.19 | 3  |
| Visinin-like protein 1            | P62761 | 0.65846 | 1.14 | 1.14 | 18 |
| Kv channel-interacting protein 4  | Q6PHZ8 | 0.65847 | 1.14 | 1.14 |    |
| Kv channel-interacting protein 2  | Q9JJ69 | 0.65848 | 1.14 | 1.14 |    |
| Disks large-associated protein 1  | Q9D415 | 0.66298 | 0.97 | 1.03 | 20 |
| Synaptopodin                      | Q8CC35 | 0.66298 | 0.94 | 1.07 | 18 |
| Very-long-chain enoyl-CoA reducta | Q9CY27 | 0.66298 | 0.85 | 1.18 | 6  |
| cGMP-dependent 3',5'-cyclic phosp | Q922S4 | 0.66498 | 1.07 | 1.07 | 14 |



|                                   |        |         |      |      |    |
|-----------------------------------|--------|---------|------|------|----|
| Acyl-coenzyme A thioesterase 10,  | Q32MW3 | 0.66498 | 0.91 | 1.10 | 6  |
| Acyl-coenzyme A thioesterase 9, m | Q9R0X4 |         |      |      |    |
| cAMP-dependent protein kinase typ | P31324 | 0.66786 | 1.12 | 1.12 | 4  |
| PR domain zinc finger protein 16  | A2A935 | 0.66939 | 1.02 | 1.02 | 4  |
| Epidermal growth factor receptor  | Q60902 | 0.67092 | 1.09 | 1.09 | 7  |
| NADH dehydrogenase [ubiquinone] 1 | Q9DC69 | 0.67244 | 1.10 | 1.10 | 25 |
| Megakaryocyte-associated tyrosine | P41242 | 0.67396 | 0.78 | 1.28 | 2  |
| Cadherin-8                        | P97291 | 0.68202 | 0.82 | 1.22 | 2  |
| Gamma-aminobutyric acid receptor  | P26048 | 0.68677 | 0.84 | 1.20 | 3  |
| Gamma-aminobutyric acid receptor  | Q9D6F4 | 0.68677 | 0.84 | 1.21 |    |
| Gamma-aminobutyric acid receptor  | P26049 | 0.68677 | 0.84 | 1.22 |    |
| Gamma-aminobutyric acid receptor  | Q8BHJ7 | 0.68677 | 0.84 | 1.23 |    |
| Gamma-aminobutyric acid receptor  | P62812 | 0.68677 | 0.84 | 1.24 |    |
| Engulfment and cell motility prot | Q8BPU7 | 0.68969 | 1.04 | 1.04 | 14 |
| Annexin A2                        | P07356 | 0.68969 | 1.12 | 1.12 | 6  |
| Rho GTPase-activating protein 23  | Q69ZH9 | 0.69439 | 1.07 | 1.07 | 9  |
| Guanine nucleotide-binding protei | P21278 | 0.69544 | 1.21 | 1.21 | 3  |
| Guanine nucleotide-binding protei | P30677 |         |      |      |    |
| Cadherin-6                        | P97326 | 0.69544 | 0.45 | 2.23 | 2  |
| Protein NipSnap homolog 2         | O55126 | 0.69582 | 0.90 | 1.11 | 4  |
| Neuronal calcium sensor 1         | Q8BNY6 | 0.70788 | 1.12 | 1.12 | 12 |
| Major prion protein               | P04925 | 0.70882 | 1.12 | 1.12 | 10 |
| Phospholipid-transporting ATPase  | P70704 | 0.70882 | 0.99 | 1.01 | 7  |
| Phospholipid-transporting ATPase  | P98200 |         |      |      |    |
| Peroxiredoxin-2                   | Q61171 | 0.70926 | 1.08 | 1.08 | 5  |
| 60S ribosomal protein L13a        | P19253 | 0.71019 | 0.93 | 1.07 | 6  |
| Ankyrin repeat and BTB/POZ domain | Q6GQW0 | 0.71155 | 0.88 | 1.14 | 4  |
| Fructose-bisphosphate aldolase C  | P05063 | 0.71200 | 0.99 | 1.01 | 7  |
| Fructose-bisphosphate aldolase B  | Q91Y97 |         |      |      |    |
| Zinc finger protein 521           | Q6KAS7 | 0.71200 | 0.91 | 1.10 | 2  |
| Zinc finger protein 423           | Q80TS5 | 0.71200 | 0.91 | 1.11 |    |
| Atlastin-2                        | Q6PA06 | 0.71200 | 0.91 | 1.12 |    |
| Synapsin-2                        | Q64332 | 0.71200 | 0.97 | 1.03 | 57 |

|                                                       |        |         |      |      |    |
|-------------------------------------------------------|--------|---------|------|------|----|
| Vesicle-associated membrane prote                     | Q9WV55 | 0.71290 | 0.92 | 1.09 | 3  |
| Leucine rich adaptor protein 1                        | Q9D6I9 | 0.71425 | 0.93 | 1.07 | 4  |
| Heterochromatin protein 1-binding                     | Q3TEA8 | 0.72299 | 1.12 | 1.12 | 5  |
| 60 kDa heat shock protein, mitoch                     | P63038 | 0.72299 | 1.17 | 1.17 | 6  |
| LIM and calponin homology domains                     | Q3UH68 | 0.72348 | 0.85 | 1.17 | 12 |
| Claudin-12                                            | Q9ET43 | 0.72348 | 0.88 | 1.14 | 2  |
| Protein FAM89B                                        | Q9QUI1 | 0.72348 | 1.20 | 1.20 | 3  |
| GPI inositol-deacylase                                | Q3UUQ7 | 0.72428 | 1.06 | 1.06 | 2  |
| 60S ribosomal protein L28                             | P41105 | 0.72556 | 0.98 | 1.03 | 2  |
| NADH dehydrogenase [ubiquinone] 1                     | Q9CR61 | 0.72580 | 1.10 | 1.10 | 2  |
| Peptidyl-tRNA hydrolase 2, mitoch                     | Q8R2Y8 | 0.72759 | 0.85 | 1.18 | 2  |
| Myotubularin-related protein 1                        | Q9Z2C4 | 0.72759 | 1.22 | 1.22 | 3  |
| E3 ubiquitin-protein ligase TRIM9                     | Q8C7M3 | 0.72810 | 0.86 | 1.16 | 2  |
| Rho GTPase-activating protein 44                      | Q5SSM3 | 0.72810 | 0.96 | 1.04 | 3  |
| Cytospin-B                                            | Q5SXY1 | 0.73187 | 1.16 | 1.16 | 10 |
| NAD-dependent protein deacetylase sirtuin-2           | Q8VDQ8 | 0.73737 | 1.06 | 1.06 | 11 |
| Succinate--CoA ligase [ADP/GDP-forming] subunit a     | Q9WUM5 | 0.73859 | 1.05 | 1.05 | 8  |
| Aggrecan core protein                                 | Q61282 | 0.73981 | 0.94 | 1.07 | 4  |
| Transmembrane protein 11, mitochondrial               | Q8BK08 | 0.74103 | 0.79 | 1.27 | 3  |
| 60S ribosomal protein L34                             | Q9D1R9 | 0.74223 | 0.87 | 1.15 | 2  |
| NADH dehydrogenase [ubiquinone] iron-sulfur protei    | Q9DCT2 | 0.74344 | 1.10 | 1.10 | 14 |
| Elongation factor 2                                   | P58252 | 0.74585 | 1.03 | 1.03 | 4  |
| Protein phosphatase 1 regulatory inhibitor subunit 16 | Q8VHQ3 | 0.74585 | 0.90 | 1.11 | 6  |
| CAD protein                                           | B2RQC6 | 0.74585 | 1.12 | 1.12 | 2  |
| Hyaluronan and proteoglycan linkprotein 2             | Q9ESM3 | 0.74701 | 0.90 | 1.11 | 12 |
| Casein kinase I isoform alpha                         | Q8BK63 | 0.74701 | 0.85 | 1.18 | 2  |
| Excitatory amino acid transporter2                    | P43006 | 0.74702 | 1.05 | 1.05 | 6  |
| 40S ribosomal protein S11                             | P62281 | 0.74760 | 0.89 | 1.12 | 3  |
| Fructose-bisphosphate aldolase A                      | P05064 | 0.74818 | 0.93 | 1.08 | 18 |
| Cartilage acidic protein 1                            | Q8R555 | 0.74819 | 1.19 | 1.19 | 3  |
| Fibrocystin-L                                         | Q80ZA4 | 0.74876 | 0.94 | 1.06 | 7  |
| Bridging integrator 2                                 | D3Z6Q9 |         |      |      |    |
| Myc box-dependent-interacting protein 1               | O08539 |         |      |      |    |

|                                                         |        |         |      |      |    |
|---------------------------------------------------------|--------|---------|------|------|----|
| ER membrane protein complex subunit                     | Q8C7X2 | 0.74876 | 1.21 | 1.21 | 2  |
| NCK-interacting protein with SH3 domain                 | Q9ESJ4 | 0.74934 | 0.91 | 1.10 | 2  |
| NADH-ubiquinone oxidoreductase chain 2                  | P03893 | 0.74991 | 0.87 | 1.16 | 2  |
| Methionine--tRNA ligase, cytoplasmic                    | Q68FL6 | 0.75046 | 0.97 | 1.03 | 2  |
| Pentatricopeptide repeat domain-containing protein 3    | Q14C51 | 0.75046 | 1.05 | 1.05 | 2  |
| Twinfilin-1                                             | Q91YR1 | 0.75105 | 1.24 | 1.24 | 2  |
| Rho guanine nucleotide exchange factor 25               | Q9CWR0 | 0.75160 | 0.91 | 1.10 | 39 |
| Kalirin                                                 | A2CG49 |         |      |      |    |
| Guanine nucleotide exchange factor DBS                  | Q64096 |         |      |      |    |
| Rap guanine nucleotide exchange factor 3                | Q8VCC8 | 0.75209 | 0.97 | 1.03 | 49 |
| Serine dehydratase-like                                 | Q8R238 |         |      |      |    |
| Rap guanine nucleotide exchange factor 4                | Q9EQZ6 |         |      |      |    |
| WD repeat-containing protein 37                         | Q8CBE3 | 0.75209 | 1.23 | 1.23 | 6  |
| Sesquipedalian-2                                        | Q14B98 | 0.75209 | 0.97 | 1.03 | 24 |
| Connector enhancer of kinase suppressor of ras 2        | Q80YA9 |         |      |      |    |
| Noelin-3                                                | P63056 | 0.75320 | 0.91 | 1.10 | 4  |
| Copine-4                                                | Q8BLR2 | 0.75326 | 0.94 | 1.07 | 21 |
| Casein kinase I isoform epsilon                         | Q9JMK2 | 0.75326 | 1.34 | 1.34 | 3  |
| Cat eye syndrome critical region protein 6 homolog      | Q99MX7 | 0.75386 | 0.85 | 1.18 | 4  |
| 5'-AMP-activated protein kinase catalytic subunit alpha | Q8BRK8 | 0.75386 | 0.89 | 1.13 | 2  |
| 14-3-3 protein theta                                    | P68254 | 0.75430 | 0.82 | 1.21 | 3  |
| Probable Xaa-Pro aminopeptidase 3                       | B7ZMP1 | 0.75438 | 0.91 | 1.10 | 5  |
| Aldehyde dehydrogenase family 3 member B1               | Q80VQ0 | 0.75591 | 1.11 | 1.11 | 19 |
| Aldehyde dehydrogenase family 3 member B2               | E9Q3E1 |         |      |      |    |
| Aldehyde dehydrogenase family 3 member B3               | J3QMK6 |         |      |      |    |
| Galactose-3-O-sulfotransferase 2                        | Q6XQH0 | 0.75591 | 1.08 | 1.08 | 3  |
| Acetyl-CoA acetyltransferase, mitochondrial             | Q8QZT1 | 0.75650 | 0.89 | 1.12 | 7  |
| Synaptosomal-associated protein 25                      | P60879 | 0.75650 | 0.80 | 1.25 | 2  |
| ATP synthase F(0) complex subunit B1, mitochondrial     | Q9CQQ7 | 0.75976 | 1.19 | 1.19 | 6  |
| Cartilage intermediate layer protein 1                  | Q66K08 | 0.76359 | 1.39 | 1.39 | 2  |
| Sushi-repeat-containing protein SRPX                    | Q9R0M3 |         |      |      |    |
| Cyclin-dependent kinase-like 5                          | Q3UTQ8 | 0.77498 | 0.96 | 1.04 | 11 |
| D-3-phosphoglycerate dehydrogenase                      | Q61753 | 0.77498 | 1.03 | 1.03 | 5  |

|                                                      |        |         |      |      |     |
|------------------------------------------------------|--------|---------|------|------|-----|
| Syntaphilin                                          | Q80U23 | 0.77566 | 0.89 | 1.12 | 11  |
| Syntabulin                                           | Q8BHS8 |         |      |      |     |
| Phospholipid hydroperoxide glutathione peroxidase,   | Q91XR9 | 0.77875 | 1.01 | 1.01 | 6   |
| Phospholipid hydroperoxide glutathione peroxidase,   | O70325 |         |      |      |     |
| Ankyrin repeat and SAM domain-containing protein 1   | P59672 | 0.78250 | 0.84 | 1.19 | 2   |
| Breast carcinoma-amplified sequence 1 homolog        | Q80YN3 | 0.78351 | 1.06 | 1.06 | 19  |
| 60S ribosomal protein L27                            | P61358 | 0.78452 | 1.09 | 1.09 | 2   |
| NADH dehydrogenase [ubiquinone] iron-sulfur protein  | P52503 | 0.78922 | 1.09 | 1.09 | 4   |
| Brain-specific angiogenesis inhibitor 1              | Q3UHD1 | 0.78922 | 0.87 | 1.15 | 11  |
| UPF0258 protein KIAA1024                             | Q8K3V7 | 0.79021 | 0.93 | 1.07 | 3   |
| Peroxisomal multifunctional enzyme type 2            | P51660 | 0.79389 | 0.96 | 1.05 | 12  |
| Alpha-tubulin N-acetyltransferase                    | Q8K341 | 0.79755 | 1.08 | 1.08 | 2   |
| Microtubule-associated protein 1S                    | Q8C052 | 0.79947 | 0.93 | 1.08 | 2   |
| T-complex protein 11-like protein                    | Q8BTG3 | 0.79947 | 1.18 | 1.18 | 2   |
| Serine/threonine-protein kinase BRSK1                | Q5RJI5 | 0.80006 | 0.94 | 1.06 | 9   |
| Phosphatidylglycerophosphatase and protein-tyrosine  | Q66GT5 | 0.80006 | 0.92 | 1.09 | 5   |
| MAGUK p55 subfamily member 5                         | Q9JLB2 | 0.80006 | 1.10 | 1.10 | 6   |
| Reticulon-4 receptor-like 1                          | Q8K0S5 | 0.80026 | 1.02 | 1.02 | 178 |
| Structural maintenance of chromosomes flexible hinge | Q6P5D8 |         |      |      |     |
| UPF0469 protein KIAA0907                             | Q3TCX3 |         |      |      |     |
| Presequence protease, mitochondrial                  | Q8K411 |         |      |      |     |
| Spectrin beta chain, non-erythrocytic 1              | Q62261 |         |      |      |     |
| Inactive phospholipase C-like protein 1              | Q3USB7 | 0.80026 | 1.15 | 1.15 | 5   |
| NADH dehydrogenase [ubiquinone] 1 alpha subcomplex   | Q9CPP6 | 0.80026 | 0.88 | 1.14 | 4   |
| Cyclin-dependent-like kinase 5                       | P49615 | 0.80062 | 1.13 | 1.13 | 4   |
| V-type proton ATPase subunit S1                      | Q9R1Q9 | 0.80062 | 0.95 | 1.05 | 2   |
| Myelin and lymphocyte protein                        | O09198 | 0.80138 | 1.07 | 1.07 | 7   |
| Unconventional myosin-VI                             | Q64331 | 0.80138 | 1.02 | 1.02 | 44  |
| Glutamate receptor ionotropic, kainate 2             | P39087 | 0.80157 | 0.92 | 1.08 | 7   |
| Mitochondrial carrier homolog 1                      | Q791T5 | 0.80229 | 0.87 | 1.15 | 6   |
| 5'-AMP-activated protein kinase subunit beta-2       | Q6PAM0 | 0.80229 | 1.09 | 1.09 | 3   |
| Sodium-dependent neutral amino acid transporter B(   | O88576 | 0.80251 | 1.10 | 1.10 | 2   |
| Sodium-dependent neutral amino acid transporter B(   | Q9D687 |         |      |      |     |

|                                                        |        |         |      |      |    |
|--------------------------------------------------------|--------|---------|------|------|----|
| Serine/threonine-protein kinase BRSK2                  | Q69Z98 | 0.80304 | 1.12 | 1.12 | 6  |
| Acid ceramidase                                        | Q9WV54 | 0.80304 | 0.78 | 1.28 | 6  |
| Calcium uptake protein 3, mitochondrial                | Q9CTY5 | 0.80379 | 1.08 | 1.08 | 4  |
| Transketolase                                          | P40142 | 0.80578 | 1.17 | 1.17 | 4  |
| Microtubule-associated serine/threonine-protein kinase | Q3U214 | 0.80669 | 0.92 | 1.09 | 4  |
| Serine/threonine-protein kinase greatwall              | Q8C0P0 |         |      |      |    |
| GTPase HRas                                            | Q61411 | 0.80759 | 1.08 | 1.08 | 12 |
| GTPase NRas                                            | P08556 |         |      |      |    |
| GTPase KRas                                            | P32883 |         |      |      |    |
| Fatty acid synthase                                    | P19096 | 0.81105 | 1.09 | 1.09 | 4  |
| Ryanodine receptor 1                                   | E9PZQ0 | 0.81194 | 1.10 | 1.10 | 13 |
| Ryanodine receptor 2                                   | E9Q401 |         |      |      |    |
| C2 calcium-dependent domain-containing protein 4C      | Q5HZI2 | 0.81283 | 0.99 | 1.01 | 8  |
| ATP synthase-coupling factor 6, mitochondrial          | P97450 | 0.81556 | 0.83 | 1.21 | 3  |
| Histone deacetylase 11                                 | Q91WA3 | 0.81556 | 1.20 | 1.20 | 2  |
| EH domain-containing protein 1                         | Q9WVK4 | 0.81556 | 0.89 | 1.12 | 3  |
| Tyrosine-protein kinase Srms                           | Q62270 | 0.81556 | 0.94 | 1.06 | 29 |
| LIM domain kinase 1                                    | P53668 |         |      |      |    |
| Hepatocyte growth factor receptor                      | P16056 |         |      |      |    |
| Tyrosine-protein kinase FRK                            | Q922K9 |         |      |      |    |
| Macrophage-stimulating protein receptor                | Q62190 |         |      |      |    |
| Tyrosine-protein kinase HCK                            | P08103 |         |      |      |    |
| Proto-oncogene tyrosine-protein kinase LCK             | P06240 |         |      |      |    |
| Neuronal proto-oncogene tyrosine-protein kinase Src    | P05480 |         |      |      |    |
| Tyrosine-protein kinase Lyn                            | P25911 |         |      |      |    |
| BTB/POZ domain-containing protein KCTD12               | Q6WVG3 | 0.81880 | 1.08 | 1.08 | 3  |
| MAGUK p55 subfamily member 2                           | Q9WV34 | 0.81967 | 1.09 | 1.09 | 13 |
| Ras-related protein Rab-18                             | P35293 | 0.82089 | 0.79 | 1.26 | 2  |
| UPF0606 protein KIAA1549                               | Q68FD9 | 0.82089 | 0.91 | 1.10 | 14 |
| IgLON family member 5                                  | Q8HW98 | 0.82089 | 1.00 | 1.00 | 3  |
| Gamma-tubulin complex component 3                      | P58854 | 0.82089 | 0.97 | 1.03 | 3  |
| Calcium-dependent secretion activator 1                | Q80TJ1 | 0.82089 | 0.83 | 1.21 | 4  |
| Gamma-aminobutyric acid type B receptor subunit 2      | Q80T41 | 0.82151 | 1.04 | 1.04 | 11 |

|                                                             |        |         |      |      |    |
|-------------------------------------------------------------|--------|---------|------|------|----|
| Caskin-1                                                    | Q6P9K8 | 0.82151 | 1.00 | 1.00 | 23 |
| 40S ribosomal protein S8                                    | P62242 | 0.82151 | 0.94 | 1.07 | 5  |
| Sacsin                                                      | Q9JLC8 | 0.82151 | 1.03 | 1.03 | 57 |
| Myosin-10                                                   | Q61879 | 0.82157 | 0.99 | 1.01 | 87 |
| Ankyrin repeat and SAM domain-containing protein 3          | Q9CZK6 |         |      |      |    |
| Nuclear pore membrane glycoprotein 210-like                 | Q9D2F7 | 0.82157 | 0.87 | 1.15 | 2  |
| Tubulin gamma-2 chain                                       | Q8VCK3 | 0.82173 | 1.10 | 1.10 | 3  |
| Tubulin gamma-1 chain                                       | P83887 |         |      |      |    |
| Clathrin light chain B                                      | Q6IRU5 | 0.82236 | 0.97 | 1.03 | 3  |
| ATP-binding cassette sub-family F member 2                  | Q99LE6 | 0.82241 | 1.22 | 1.22 | 2  |
| NADH-ubiquinone oxidoreductase 75kDa subunit, mitochondrial | Q91VD9 | 0.82255 | 1.09 | 1.09 | 22 |
| Polyubiquitin-B                                             | P0CG49 | 0.82325 | 0.91 | 1.10 | 6  |
| Polyubiquitin-C                                             | P0CG50 |         |      |      |    |
| Ubiquitin-40S ribosomal protein S                           | P62983 |         |      |      |    |
| Ubiquitin-60S ribosomal protein L                           | P62984 |         |      |      |    |
| Immunoglobulin superfamily member 21                        | Q7TNR6 | 0.82824 | 1.13 | 1.13 | 2  |
| Opalin                                                      | Q7M750 | 0.82825 | 1.21 | 1.21 | 2  |
| Synaptophysin-like protein 1                                | O09117 | 0.82825 | 1.17 | 1.17 | 2  |
| Synaptophysin-like protein 2                                | O89104 |         |      |      |    |
| TNF receptor-associated factor 5                            | P70191 | 0.82825 | 0.89 | 1.13 | 2  |
| Cation channel sperm-associated protein subunit gamma       | E9Q355 | 0.82986 | 1.01 | 1.01 | 25 |
| Cytochrome b-c1 complex subunit 2                           | Q9DB77 |         |      |      |    |
| Neurofilament heavy polypeptide                             | P19246 | 0.82986 | 1.07 | 1.07 | 34 |
| AP-2 complex subunit alpha-1                                | P17426 | 0.82987 | 1.08 | 1.08 | 19 |
| Peripheral plasma membrane protein CASK                     | O70589 | 0.82987 | 0.99 | 1.01 | 28 |
| Coronin-2A                                                  | Q8C0P5 | 0.82987 | 0.91 | 1.09 | 3  |
| Synaptic vesicle glycoprotein 2A                            | Q9JIS5 | 0.83067 | 2.15 | 2.15 | 3  |
| S-phase kinase-associated protein 2                         | Q9Z0Z3 | 0.83067 | 0.94 | 1.06 | 2  |
| Multiple coagulation factor deficiency protein 2 homolog 1  | Q8K5B2 |         |      |      |    |
| Suppressor of cytokine signaling 5                          | O54928 |         |      |      |    |
| Signal transducer and activator of transcription 4          | P42228 |         |      |      |    |
| Signal transducer and activator of transcription 2          | Q9WVL2 |         |      |      |    |
| Signal transducer and transcription activator 6             | P52633 |         |      |      |    |

|                                                          |        |         |      |      |    |
|----------------------------------------------------------|--------|---------|------|------|----|
| Signal transducer and activator of transcription 1       | P42225 |         |      |      |    |
| Signal transducer and activator of transcription 3       | P42227 |         |      |      |    |
| Suppressor of cytokine signaling 4                       | Q91ZA6 |         |      |      |    |
| Signal transducer and activator of transcription 5b      | P42232 |         |      |      |    |
| Signal transducer and activator of transcription 5a      | P42230 |         |      |      |    |
| Germ cell-specific gene 1-like protein                   | D3Z7H4 | 0.83142 | 0.92 | 1.08 | 4  |
| MICOS complex subunit Mic19                              | Q9CRB9 | 0.83142 | 0.90 | 1.11 | 3  |
| Ankyrin repeat domain-containing protein 63              | A2ARS0 | 0.83142 | 1.06 | 1.06 | 2  |
| Vacuolar protein sorting-associated protein 16 homolog   | Q920Q4 | 0.83145 | 1.08 | 1.08 | 6  |
| Dual specificity mitogen-activated protein kinase kinase | P47809 | 0.83145 | 1.04 | 1.04 | 3  |
| Alpha-1,3/1,6-mannosyltransferase ALG2                   | Q9DBE8 | 0.83145 | 1.18 | 1.18 | 4  |
| Cell adhesion molecule 4                                 | Q8R464 | 0.83145 | 0.85 | 1.17 | 3  |
| Plasma membrane calcium-transporting ATPase 2            | Q9R0K7 | 0.83145 | 0.93 | 1.08 | 9  |
| Oligodendrocyte-myelin glycoprotein                      | Q63912 | 0.83215 | 1.18 | 1.18 | 12 |
| Glutaryl-CoA dehydrogenase                               | Q60759 | 0.83215 | 0.91 | 1.10 | 2  |
| Dynamin-1                                                | P39053 | 0.83216 | 1.01 | 1.01 | 30 |
| snRNA-activating protein complex                         | Q91XA5 |         |      |      |    |
| Retinitis pigmentosa 1-like 1 protein                    | Q8CGM2 | 0.83216 | 1.07 | 1.07 | 2  |
| Serine beta-lactamase-like protein LACTB, mitochondrial  | Q9EP89 |         |      |      |    |
| Cytoplasmic FMR1-interacting protein 1                   | Q7TMB8 | 0.83217 | 1.11 | 1.11 | 8  |
| Carbamoyl-phosphate synthase [ammonia], mitochondrial    | Q8C196 |         |      |      |    |
| Transcription initiation factor TFIID subunit 7          | Q9R1C0 |         |      |      |    |
| Nischarin                                                | Q80TM9 | 0.83289 | 1.03 | 1.03 | 2  |
| Glutamate receptor ionotropic, NMDA 2C                   | Q01098 | 0.83290 | 0.88 | 1.14 | 3  |
| Regulator of G-protein signaling 7                       | Q54829 | 0.83291 | 1.09 | 1.09 | 3  |
| Myelin proteolipid protein                               | P60202 | 0.83300 | 0.98 | 1.02 | 43 |
| Testis- and ovary-specific PAZ domain-containing protein | E5FYH1 | 0.83300 | 0.90 | 1.11 | 9  |
| Voltage-dependent R-type calcium channel subunit alpha   | Q61290 |         |      |      |    |
| Programmed cell death 6-interacting protein              | Q9WU78 | 0.83300 | 1.13 | 1.13 | 3  |
| Paralemmin-2                                             | Q8BR92 | 0.83305 | 1.25 | 1.25 | 11 |
| Cadherin-2                                               | P15116 | 0.83361 | 0.91 | 1.10 | 28 |
| Cadherin-4                                               | P39038 |         |      |      |    |
| Vacuolar protein sorting-associated protein 18 homolog   | Q8R307 | 0.83361 | 1.10 | 1.10 | 6  |

|                                                      |        |         |      |      |    |
|------------------------------------------------------|--------|---------|------|------|----|
| NADH-ubiquinone oxidoreductase chain 5               | P03921 | 0.83369 | 1.14 | 1.14 | 8  |
| Serine/threonine-protein kinase DCLK1                | Q9JLM8 | 0.83369 | 0.92 | 1.09 | 14 |
| Protein-arginine deiminase type-2                    | Q08642 | 0.83369 | 1.17 | 1.17 | 2  |
| NADH dehydrogenase [ubiquinone] 1alpha subcomp       | Q9ERS2 | 0.83384 | 1.00 | 1.00 | 4  |
| Pecanex-like protein 1                               | Q9QYC1 |         |      |      |    |
| Pyrin                                                | Q9JJ26 |         |      |      |    |
| DNA repair protein RAD51 homolog 3                   | Q924H5 |         |      |      |    |
| Potassium voltage-gated channel subfamily A memb     | Q61923 | 0.83424 | 1.16 | 1.16 | 3  |
| UDP-N-acetylglucosamine--peptideN-acetylglucosam     | Q8CGY8 | 0.83424 | 1.07 | 1.07 | 5  |
| Ephrin type-B receptor 3                             | P54754 | 0.83428 | 0.91 | 1.10 | 2  |
| Ephrin type-A receptor 4                             | Q03137 |         |      |      |    |
| Ephrin type-A receptor 6                             | Q62413 |         |      |      |    |
| Ephrin type-B receptor 1                             | Q8CBF3 |         |      |      |    |
| Desmoplakin                                          | E9Q557 | 0.83428 | 1.02 | 1.02 | 5  |
| Ras-related protein Rab-10                           | P61027 | 0.83428 | 1.18 | 1.18 | 5  |
| Regulator of G-protein signaling 9                   | O54828 | 0.83434 | 0.90 | 1.12 | 2  |
| FERM domain-containing protein 4A                    | Q8BIE6 | 0.83436 | 1.05 | 1.05 | 3  |
| FERM domain-containing protein 4B                    | Q920B0 |         |      |      |    |
| Arf-GAP with SH3 domain, ANK repeat and PH doma      | Q7SIG6 | 0.83436 | 1.07 | 1.07 | 3  |
| Arf-GAP with SH3 domain, ANK repeat and PH doma      | Q9QWY8 |         |      |      |    |
| Casein kinase II subunit alpha'                      | O54833 | 0.83463 | 0.88 | 1.13 | 9  |
| Phosphatidylinositol 5-phosphate 4-kinase type-2 alp | O70172 | 0.83497 | 0.91 | 1.10 | 3  |
| Epidermal growth factor receptor kinase substrate 8  | Q08509 | 0.83497 | 0.87 | 1.15 | 2  |
| Acid-sensing ion channel 1                           | Q6NXX8 | 0.83497 | 0.88 | 1.13 | 2  |
| Ras-related protein Rab-8A                           | P55258 | 0.83523 | 0.96 | 1.05 | 2  |
| Transcriptional activator protein Pur-alpha          | P42669 | 0.83523 | 0.96 | 1.04 | 5  |
| Fatty aldehyde dehydrogenase                         | P47740 | 0.83531 | 0.82 | 1.22 | 2  |
| Nuclear distribution protein nudE-like 1             | Q9ERR1 | 0.83531 | 1.28 | 1.28 | 3  |
| Nuclear distribution protein nudEhomolog 1           | Q9CZA6 |         |      |      |    |
| Contactin-associated protein-like 2                  | Q9CPW0 | 0.83598 | 1.02 | 1.02 | 19 |
| Dihydrolipoyllysine-residue acetyltransferase compo  | Q8BMF4 | 0.83610 | 1.05 | 1.05 | 18 |
| Neuronal membrane glycoprotein M6                    | P35802 | 0.83648 | 1.14 | 1.14 | 4  |
| Ciliary neurotrophic factor receptor subunit alpha   | O88507 | 0.83648 | 1.20 | 1.20 | 3  |



|                                                           |        |         |      |      |    |
|-----------------------------------------------------------|--------|---------|------|------|----|
| Delphinin                                                 | Q0QWG9 | 0.83648 | 0.95 | 1.05 | 7  |
| Pyruvate dehydrogenase protein X                          | Q8BKZ9 | 0.83716 | 0.95 | 1.05 | 8  |
| Band 4,1-like protein 3                                   | Q9WV92 | 0.83726 | 0.99 | 1.01 | 29 |
| Dual specificity mitogen-activated protein kinase kinase  | P31938 | 0.83755 | 0.98 | 1.02 | 4  |
| Methylmalonic aciduria type A homolog, mitochondrial      | Q8C7H1 | 0.83755 | 0.92 | 1.09 | 5  |
| Hyaluronan and proteoglycan linkprotein 4                 | Q80WM4 | 0.83759 | 0.95 | 1.05 | 10 |
| Hyaluronan and proteoglycan linkprotein 3                 | Q80WM5 |         |      |      |    |
| CaM kinase-like vesicle-associated protein                | Q3UHL1 | 0.83759 | 0.99 | 1.01 | 10 |
| Dynactin subunit 1                                        | O08788 | 0.83798 | 1.15 | 1.15 | 15 |
| Alpha-centractin                                          | P61164 | 0.83834 | 1.11 | 1.11 | 4  |
| Beta-hexosaminidase subunit beta                          | P20060 | 0.83839 | 0.88 | 1.14 | 10 |
| WD repeat-containing protein 7                            | Q92019 | 0.83870 | 1.07 | 1.07 | 8  |
| ATP synthase subunit g, mitochondrial                     | Q9CPQ8 | 0.85208 | 1.13 | 1.13 | 3  |
| Calcineurin subunit B type 1                              | Q63810 | 0.85264 | 0.93 | 1.08 | 2  |
| Calcineurin subunit B type 2                              | Q63811 |         |      |      |    |
| ATP-dependent 6-phosphofructokinase                       | P47857 | 0.85264 | 1.02 | 1.02 | 27 |
| Choline transporter-like protein 5                        | Q5RJI2 | 0.85264 | 0.91 | 1.10 | 8  |
| Citrate synthase, mitochondrial                           | Q9CZU6 |         |      |      |    |
| Membrane-associated phosphatidylinositol transfer protein | Q6ZPQ6 | 0.85331 | 0.89 | 1.12 | 6  |
| Fructosamine-3-kinase                                     | Q9ER35 | 0.85374 | 1.40 | 1.40 | 3  |
| Neurocan core protein                                     | P55066 | 0.85374 | 0.94 | 1.07 | 7  |
| Beta-adducin                                              | Q9QYB8 | 0.85398 | 1.08 | 1.08 | 6  |
| Drebrin                                                   | Q9QXS6 | 0.85452 | 1.05 | 1.05 | 8  |
| WAS/WASL-interacting protein family member 3              | P0C7L0 | 0.85452 | 1.03 | 1.03 | 6  |
| ATP-dependent RNA helicase DDX1                           | Q91VR5 | 0.85489 | 0.93 | 1.08 | 8  |
| Golgi-associated plant pathogenesis-related protein       | Q9CYL5 | 0.85531 | 0.93 | 1.07 | 2  |
| Casein kinase I isoform gamma-2                           | Q8BVP5 | 0.85531 | 0.78 | 1.29 | 4  |
| Casein kinase I isoform gamma-3                           | Q8C4X2 |         |      |      |    |
| Cyclin-dependent kinase 5 activator 2                     | O35926 | 0.85611 | 1.27 | 1.27 | 3  |
| PH and SEC7 domain-containing protein 1                   | Q5DTT2 | 0.85611 | 0.92 | 1.09 | 7  |
| U7 snRNA-associated Sm-like protein LSm11                 | Q8BUV6 | 0.85649 | 0.90 | 1.11 | 2  |
| Rotatin                                                   | Q8R4Y8 | 0.85688 | 0.93 | 1.07 | 2  |
| Flotillin-2                                               | Q60634 | 0.85688 | 0.93 | 1.08 | 14 |

|                                                      |        |         |      |      |     |
|------------------------------------------------------|--------|---------|------|------|-----|
| Dynamin-2                                            | P39054 | 0.85688 | 0.87 | 1.14 | 7   |
| Disheveled-associated activator of morphogenesis 1   | Q8BPM0 | 0.85688 | 1.00 | 1.00 | 16  |
| Fascin                                               | Q61553 | 0.85989 | 1.05 | 1.05 | 3   |
| Glutamate receptor 4                                 | Q9Z2W8 | 0.85989 | 0.88 | 1.14 | 9   |
| Rho-related GTP-binding protein RhoC                 | Q62159 | 0.86053 | 1.12 | 1.12 | 3   |
| Transforming protein RhoA                            | Q9QUI0 |         |      |      |     |
| Acyl-protein thioesterase 2                          | Q9WTL7 | 0.86087 | 1.00 | 1.00 | 2   |
| Adenosine 3'-phospho 5'-phosphosulfate transporter   | Q91ZN5 | 0.86151 | 1.02 | 1.02 | 241 |
| Spectrin alpha chain, non-erythrocytic 1             | P16546 |         |      |      |     |
| Huntingtin                                           | P42859 |         |      |      |     |
| Eukaryotic translation initiation factor 3 subunit B | Q8JZQ9 | 0.86262 | 0.93 | 1.07 | 2   |
| Trimethylguanosine synthase                          | Q923W1 |         |      |      |     |
| PR domain zinc finger protein 1                      | Q60636 |         |      |      |     |
| Cullin-3                                             | Q9JLV5 |         |      |      |     |
| Integral membrane protein 2B                         | O89051 | 0.86262 | 1.07 | 1.07 | 5   |
| 3-ketoacyl-CoA thiolase B, peroxisomal               | Q8VCH0 | 0.86340 | 1.05 | 1.05 | 2   |
| 3-ketoacyl-CoA thiolase A, peroxisomal               | Q921H8 |         |      |      |     |
| C-Jun-amino-terminal kinase-interacting protein 3    | Q9ESN9 | 0.86340 | 0.86 | 1.17 | 3   |
| Enoyl-CoA delta isomerase 2, mitochondrial           | Q9WUR2 | 0.86419 | 0.99 | 1.01 | 3   |
| A-kinase anchor protein 5                            | D3YVF0 | 0.86528 | 1.11 | 1.11 | 11  |
| Traf2 and NCK-interacting protein kinase             | P83510 | 0.86739 | 0.94 | 1.07 | 6   |
| Protein lifeguard 3                                  | Q8BJZ3 | 0.86739 | 0.92 | 1.09 | 2   |
| Metabotropic glutamate receptor 5                    | Q3UVX5 | 0.86739 | 1.04 | 1.04 | 3   |
| Neuron navigator 1                                   | Q8CH77 | 0.86757 | 0.84 | 1.19 | 3   |
| Voltage-dependent L-type calcium channel subunit b   | P54285 | 0.86757 | 0.90 | 1.11 | 8   |
| 28S ribosomal protein S31, mitochondrial             | Q61733 | 0.86757 | 1.08 | 1.08 | 2   |
| Peptidyl-prolyl cis-trans isomerase A                | P17742 | 0.86800 | 0.86 | 1.16 | 2   |
| Cofilin-1                                            | P18760 | 0.86916 | 0.86 | 1.16 | 3   |
| Serine/threonine-protein kinase 25                   | Q9Z2W1 | 0.86916 | 1.03 | 1.03 | 2   |
| Serine/threonine-protein kinase 26                   | Q99JT2 |         |      |      |     |
| Serine/threonine-protein kinase 24                   | Q99KH8 |         |      |      |     |
| Actin-related protein 3B                             | Q641P0 | 0.86977 | 0.96 | 1.04 | 5   |
| Actin-related protein 3                              | Q99JY9 |         |      |      |     |

|                                                      |        |         |      |      |     |
|------------------------------------------------------|--------|---------|------|------|-----|
| BTB/POZ domain-containing protein 17                 | Q9DB72 | 0.86981 | 1.17 | 1.17 | 11  |
| Monoacylglycerol lipase ABHD12                       | Q99LR1 | 0.86981 | 0.90 | 1.11 | 4   |
| Ras GTPase-activating protein 3                      | Q60790 | 0.86981 | 1.07 | 1.07 | 20  |
| Cell division control protein 42                     | P60766 | 0.86996 | 1.08 | 1.08 | 9   |
| F-box only protein 41                                | Q6NS60 | 0.87041 | 0.97 | 1.04 | 10  |
| 60S ribosomal protein L13                            | P47963 | 0.87101 | 0.98 | 1.02 | 7   |
| Zinc finger and BTB domain-containing protein 20     | Q8K0L9 | 0.87161 | 0.94 | 1.06 | 14  |
| Integrin beta-3                                      | O54890 |         |      |      |     |
| Leucine-rich repeat-containing protein 57            | Q9D1G5 |         |      |      |     |
| Nck-associated protein 1                             | P28660 | 0.88069 | 1.02 | 1.02 | 35  |
| Serine/threonine-protein phosphatase PP1-beta cata   | P62141 | 0.88069 | 1.01 | 1.01 | 16  |
| Serine/threonine-protein phosphatase PP1-alpha cat   | P62137 |         |      |      |     |
| Serine/threonine-protein phosphatase PP1-gamma c     | P63087 |         |      |      |     |
| TANK-binding kinase 1-binding protein 1              | A2A9T0 | 0.88299 | 1.01 | 1.01 | 2   |
| Beta-centractin                                      | Q8R5C5 | 0.88299 | 1.05 | 1.05 | 3   |
| Rho-related GTP-binding protein RhoB                 | P62746 | 0.88381 | 0.91 | 1.10 | 3   |
| Ceramide kinase                                      | Q8K4Q7 | 0.88381 | 0.96 | 1.04 | 6   |
| Optic atrophy 3 protein homolog                      | Q505D7 | 0.88476 | 0.90 | 1.11 | 2   |
| Echinoderm microtubule-associatedprotein-like 6      | Q5SQM0 | 0.88476 | 1.04 | 1.04 | 5   |
| Cyclin-dependent kinase 17                           | Q8K0D0 | 0.88532 | 0.96 | 1.04 | 4   |
| Protein TANC2                                        | A2A690 | 0.88552 | 0.97 | 1.03 | 24  |
| Gamma-enolase                                        | P17183 | 0.88557 | 0.92 | 1.09 | 2   |
| Protein FAM49B                                       | Q921M7 | 0.88557 | 1.17 | 1.17 | 3   |
| Peptidyl-prolyl cis-trans isomerase FKBP8 2          | O35465 | 0.88557 | 0.72 | 1.39 | 2   |
| SID1 transmembrane family member2                    | Q8CIF6 | 0.88557 | 0.99 | 1.01 | 102 |
| Unconventional myosin-Vb                             | P21271 |         |      |      |     |
| Unconventional myosin-Va                             | Q99104 |         |      |      |     |
| Mitochondrial glutamate carrier 2                    | Q9DB41 | 0.88665 | 0.88 | 1.14 | 7   |
| Serine/threonine-protein phosphatase 2A 56 kDa reg   | Q61151 | 0.88665 | 1.10 | 1.10 | 3   |
| Cdc42 effector protein 1                             | Q91W92 | 0.88721 | 0.90 | 1.11 | 5   |
| Probable ubiquitin carboxyl-terminal hydrolase FAF-) | P70398 | 0.89358 | 1.04 | 1.04 | 7   |
| NADH dehydrogenase [ubiquinone] 1alpha subcomp       | Q9CQ75 | 0.89712 | 1.03 | 1.03 | 6   |
| Hemoglobin subunit epsilon-Y2                        | P02104 | 0.89712 | 0.99 | 1.01 | 5   |

|                                                       |        |         |      |      |    |
|-------------------------------------------------------|--------|---------|------|------|----|
| Hemoglobin subunit beta-1                             | P02088 |         |      |      |    |
| Hemoglobin subunit beta-2                             | P02089 |         |      |      |    |
| Hyaluronan and proteoglycan linkprotein 1             | Q9QUP5 | 0.89712 | 0.92 | 1.08 | 16 |
| 26S protease regulatory subunit 10b                   | P62334 | 0.89762 | 0.97 | 1.04 | 2  |
| Vacuolar protein sorting-associated protein 51 homo   | Q3UVL4 | 0.89783 | 1.13 | 1.13 | 2  |
| MICOS complex subunit Mic25                           | Q91VN4 | 0.89783 | 0.78 | 1.28 | 4  |
| Reticulon-3                                           | Q9ES97 | 0.89820 | 0.88 | 1.14 | 4  |
| Interleukin-1 receptor accessoryprotein-like 1        | P59823 | 0.89820 | 1.11 | 1.11 | 3  |
| Glycerol kinase                                       | Q64516 | 0.89832 | 0.85 | 1.17 | 12 |
| Glycerol kinase 2                                     | Q9WU65 |         |      |      |    |
| Dynamin-like 120 kDa protein, mitochondrial           | P58281 | 0.89850 | 0.93 | 1.08 | 2  |
| Plakophilin-4                                         | Q68FH0 | 0.89850 | 0.93 | 1.07 | 43 |
| Calcium-binding mitochondrial carrier protein Aralar2 | Q9QXX4 | 0.89861 | 1.09 | 1.09 | 2  |
| 40S ribosomal protein S23                             | P62267 | 0.89861 | 0.84 | 1.20 | 2  |
| Cathepsin B                                           | P10605 | 0.89881 | 0.90 | 1.12 | 3  |
| Heat shock factor-binding protein1                    | Q9CQZ1 | 0.89899 | 0.77 | 1.30 | 4  |
| Voltage-dependent P/Q-type calcium channel subuni     | P97445 | 0.89899 | 0.98 | 1.02 | 30 |
| NADH dehydrogenase [ubiquinone] 1alpha subcomp        | Q7TMF3 | 0.89901 | 0.92 | 1.09 | 9  |
| Tumor susceptibility gene 101 protein                 | Q61187 | 0.89901 | 0.92 | 1.09 | 4  |
| Coronin-1C                                            | Q9WUM4 | 0.89901 | 0.96 | 1.04 | 9  |
| Rho guanine nucleotide exchange factor 9              | Q3UTH8 | 0.89904 | 1.07 | 1.07 | 3  |
| Spermatogenesis-associated protein 13                 | Q5DU57 |         |      |      |    |
| Rho guanine nucleotide exchange factor 4              | Q7TNR9 |         |      |      |    |
| Junctional adhesion molecule C                        | Q9D8B7 | 0.89914 | 0.56 | 1.77 | 2  |
| Syntaxin-binding protein 6                            | Q8R3T5 | 0.89914 | 1.03 | 1.03 | 3  |
| ATP-dependent 6-phosphofructokinase, liver type       | P12382 | 0.89919 | 0.97 | 1.04 | 7  |
| Potassium voltage-gated channel subfamily KQT me      | Q9Z351 | 0.89919 | 1.06 | 1.06 | 4  |
| Gephyrin                                              | Q8BUV3 | 0.89930 | 1.05 | 1.05 | 13 |
| Sphingosine-1-phosphate lyase 1                       | Q8R0X7 | 0.89957 | 1.03 | 1.03 | 2  |
| Myosin light chain 6B                                 | Q8CI43 | 0.89961 | 1.32 | 1.32 | 3  |
| Ubiquitin carboxyl-terminal hydrolase 46              | P62069 | 0.89970 | 0.92 | 1.09 | 3  |
| Ras-related protein Rab-22A                           | P35285 | 0.89970 | 0.95 | 1.06 | 3  |
| Ras-related protein Rab-31                            | Q921E2 |         |      |      |    |

|                                                       |        |         |      |      |    |
|-------------------------------------------------------|--------|---------|------|------|----|
| Voltage-dependent calcium channel subunit alpha-2     | O08532 | 0.89970 | 1.13 | 1.13 | 2  |
| Cathepsin F                                           | Q9R013 | 0.89979 | 0.86 | 1.16 | 2  |
| cAMP-dependent protein kinase catalytic subunit alp   | P05132 | 0.89979 | 1.01 | 1.01 | 3  |
| NADH dehydrogenase [ubiquinone] 1 beta subcompl       | O09111 | 0.89989 | 0.94 | 1.06 | 2  |
| Periaxin                                              | O55103 | 0.89989 | 1.06 | 1.06 | 7  |
| Phosphofurin acidic cluster sorting protein 1         | Q8K212 | 0.89989 | 1.06 | 1.06 | 13 |
| Ras-related protein Rab-14                            | Q91V41 | 0.89989 | 0.98 | 1.02 | 3  |
| Dystonin                                              | Q91ZU6 | 0.90007 | 0.97 | 1.03 | 54 |
| Unconventional myosin-Ia                              | O88329 | 0.90007 | 1.03 | 1.03 | 15 |
| Unconventional myosin-Ib                              | P46735 |         |      |      |    |
| Cytochrome b5 type B                                  | Q9CQX2 | 0.90007 | 0.87 | 1.15 | 3  |
| Plasmolipin                                           | Q9DCU2 | 0.90007 | 0.91 | 1.10 | 9  |
| Exocyst complex component 1                           | Q8R3S6 | 0.90008 | 0.91 | 1.09 | 10 |
| Protein C10                                           | O35127 | 0.90009 | 1.06 | 1.06 | 4  |
| 60S ribosomal protein L7                              | P14148 | 0.90009 | 0.96 | 1.04 | 10 |
| 60S ribosomal protein L7-like 1                       | Q9D8M4 |         |      |      |    |
| Fibrinogen beta chain                                 | Q8K0E8 | 0.90016 | 1.10 | 1.10 | 2  |
| Protein RUFY3                                         | Q9D394 | 0.90031 | 1.10 | 1.10 | 4  |
| Homer protein homolog 2                               | Q9QWW1 | 0.90031 | 1.14 | 1.14 | 7  |
| Synaptotagmin-6                                       | Q9R0N8 | 0.90052 | 1.04 | 1.04 | 9  |
| Disintegrin and metalloproteinase domain-containing   | Q9R1V6 | 0.90052 | 1.14 | 1.14 | 7  |
| Phosphate carrier protein, mitochondria               | Q8VEM8 | 0.90059 | 0.98 | 1.02 | 12 |
| GTP-binding protein Di-Ras1                           | Q91Z61 | 0.90062 | 1.08 | 1.08 | 5  |
| Microtubule-associated serine/threonine-protein kina  | Q811L6 | 0.90063 | 0.88 | 1.13 | 2  |
| Microtubule-associated serine/threonine-protein kina  | Q9R1L5 |         |      |      |    |
| Src substrate cortactin                               | Q60598 | 0.90063 | 1.01 | 1.01 | 5  |
| Ras-related protein Ral-A                             | P63321 | 0.90090 | 1.14 | 1.14 | 4  |
| Disco-interacting protein 2 homolog A                 | Q8BWT5 | 0.90090 | 1.00 | 1.00 | 8  |
| Dematin                                               | Q9WV69 | 0.90101 | 0.97 | 1.03 | 5  |
| CDP-diacylglycerol--inositol 3-phosphatidyltransferas | Q8VDP6 | 0.90101 | 1.09 | 1.09 | 2  |
| Cyclin-dependent kinase 18                            | Q04899 | 0.90108 | 0.97 | 1.03 | 5  |
| Rho GTPase-activating protein 5                       | P97393 | 0.90116 | 0.97 | 1.03 | 3  |
| Leucine-rich repeat and guanylatekinase domain-cor    | Q9D5S7 |         |      |      |    |

|                                                        |        |         |      |      |    |
|--------------------------------------------------------|--------|---------|------|------|----|
| Abl interactor 1                                       | Q8CBW3 | 0.90132 | 1.14 | 1.14 | 7  |
| Mitochondrial import receptor subunit TOM70            | Q9CZW5 | 0.90132 | 0.83 | 1.21 | 5  |
| Peptidyl-prolyl cis-trans isomerase B                  | P24369 | 0.90132 | 1.07 | 1.07 | 3  |
| Copine-5                                               | Q8JZW4 | 0.90136 | 1.10 | 1.10 | 23 |
| tRNA wybutosine-synthesizing protein 4                 | Q8BYR1 | 0.90136 | 0.93 | 1.07 | 35 |
| Prolactin                                              | P06879 |         |      |      |    |
| Septin-5                                               | Q9Z2Q6 |         |      |      |    |
| Armadillo repeat protein deleted in velo-cardio-facial | P98203 | 0.90164 | 1.05 | 1.05 | 8  |
| NADH dehydrogenase [ubiquinone] flavoprotein 1, m      | Q91YT0 | 0.90164 | 0.93 | 1.08 | 12 |
| Essential MCU regulator, mitochondrial                 | Q9DB10 | 0.90171 | 1.07 | 1.07 | 2  |
| Mitochondrial-processing peptidase subunit beta        | Q9CXT8 | 0.90171 | 1.06 | 1.06 | 21 |
| Cytochrome b-c1 complex subunit 1                      | Q9CZ13 |         |      |      |    |
| Heat shock-related 70 kDa protein 2                    | P17156 | 0.90176 | 1.01 | 1.01 | 25 |
| Heat shock cognate 71 kDa protein                      | P63017 |         |      |      |    |
| Nuclear receptor coactivator 7                         | Q6DFV7 | 0.90176 | 1.14 | 1.14 | 3  |
| Protein numb homolog                                   | Q9QZS3 |         |      |      |    |
| Transmembrane protein 33                               | Q9CR67 | 0.90183 | 1.10 | 1.10 | 2  |
| Synaptojanin-1                                         | Q8CHC4 | 0.90196 | 1.02 | 1.02 | 14 |
| Lethal(2) giant larvae protein homolog 2               | Q3TJ91 | 0.90196 | 0.88 | 1.13 | 13 |
| Lethal(2) giant larvae protein homolog 2               | Q80Y17 |         |      |      |    |
| Protein NLRC5                                          | C3VPR6 | 0.90196 | 1.00 | 1.00 | 3  |
| PDZ domain-containing protein 4                        | Q9QY39 |         |      |      |    |
| Protein XRP2                                           | Q9EPK2 | 0.90202 | 1.12 | 1.12 | 5  |
| 60S ribosomal protein L29                              | P47915 | 0.90202 | 1.05 | 1.05 | 2  |
| Ubiquitin-conjugating enzyme E2 N                      | P61089 | 0.90216 | 0.93 | 1.08 | 4  |
| 40S ribosomal protein S13                              | P62301 | 0.90234 | 1.04 | 1.04 | 6  |
| 60S ribosomal protein L10a                             | P53026 | 0.90239 | 0.98 | 1.02 | 6  |
| SH3 domain-containing kinase-binding protein 1         | Q8R550 | 0.90239 | 0.86 | 1.16 | 5  |
| Sterile alpha and TIR motif-containing protein 1       | Q6PDS3 | 0.90253 | 0.92 | 1.08 | 2  |
| ADP-ribosylation factor 4                              | P61750 | 0.90260 | 1.09 | 1.09 | 2  |
| ADP-ribosylation factor 5                              | P84084 |         |      |      |    |
| Malate dehydrogenase, mitochondrial                    | P08249 | 0.90260 | 0.98 | 1.02 | 6  |
| Synaptosomal-associated protein 47                     | Q8R570 | 0.90261 | 0.97 | 1.04 | 11 |

|                                                        |        |         |      |      |    |
|--------------------------------------------------------|--------|---------|------|------|----|
| Alpha-actinin-4                                        | P57780 | 0.90278 | 0.95 | 1.05 | 8  |
| DnaJ homolog subfamily A member 3                      | Q99M87 | 0.90278 | 0.89 | 1.12 | 11 |
| Alpha-crystallin B chain                               | P23927 | 0.90285 | 0.97 | 1.03 | 12 |
| Sonic hedgehog protein                                 | Q62226 | 0.90306 | 0.94 | 1.06 | 5  |
| Indian hedgehog protein                                | P97812 |         |      |      |    |
| Desert hedgehog protein                                | Q61488 |         |      |      |    |
| T-complex protein 1 subunit alpha                      | P11983 | 0.90310 | 1.02 | 1.02 | 5  |
| Paralemmin-1                                           | Q9Z0P4 | 0.90310 | 0.99 | 1.01 | 7  |
| Exocyst complex component 3                            | Q6KAR6 | 0.90310 | 1.03 | 1.03 | 14 |
| Neurotrimin                                            | Q99PJ0 | 0.90310 | 1.10 | 1.10 | 6  |
| Serine/threonine-protein phosphatase 2B catalytic su   | P63328 | 0.90314 | 1.04 | 1.04 | 4  |
| Serine/threonine-protein phosphatase 2B catalytic su   | P48453 |         |      |      |    |
| Serine/threonine-protein phosphatase 2B catalytic su   | P48455 |         |      |      |    |
| Dynactin subunit 2                                     | Q99KJ8 | 0.90319 | 1.13 | 1.13 | 12 |
| Signal-induced proliferation-associated 1-like protein | G3X9J0 | 0.90344 | 0.94 | 1.07 | 2  |
| Rho GTPase-activating protein 39                       | P59281 | 0.90344 | 0.94 | 1.07 | 19 |
| Brain-enriched guanylate kinase-associated protein     | Q68EF6 | 0.90348 | 0.94 | 1.06 | 14 |
| Serine racemase                                        | Q9QZX7 | 0.90348 | 0.92 | 1.08 | 3  |
| Tight junction protein ZO-1                            | P39447 | 0.90349 | 0.96 | 1.04 | 13 |
| NMDA receptor synaptonuclear signaling and neuron      | Q99NF2 | 0.90349 | 1.12 | 1.12 | 4  |
| Homer protein homolog 3                                | Q99JP6 | 0.90349 | 1.04 | 1.04 | 2  |
| Microtubule-associated protein RP/EB family membe      | Q6PER3 | 0.90351 | 0.83 | 1.21 | 3  |
| Bile salt export pump                                  | Q9QY30 | 0.90414 | 1.11 | 1.11 | 2  |
| CDGSH iron-sulfur domain-containing protein 3, mito    | B1AR13 | 0.90618 | 0.69 | 1.45 | 2  |
| Ras-related protein Rab-7a                             | P51150 | 0.90618 | 1.02 | 1.02 | 7  |
| Hepatocyte cell adhesion molecule                      | Q640R3 | 0.90618 | 1.08 | 1.08 | 2  |
| Serine/threonine-protein kinase TAO1                   | Q5F2E8 | 0.90618 | 0.95 | 1.05 | 15 |
| Carnitine O-acetyltransferase                          | P47934 | 0.90634 | 0.89 | 1.12 | 4  |
| PDZ domain-containing protein 11                       | Q9CZG9 | 0.90634 | 1.22 | 1.22 | 2  |
| Cerebellin-3                                           | Q9JHG0 | 0.90634 | 0.90 | 1.11 | 2  |
| Vacuolar protein sorting-associated protein 33A        | Q9D2N9 | 0.90634 | 1.01 | 1.01 | 9  |
| Vacuolar protein sorting-associated protein 37B        | Q8R0J7 | 0.90666 | 1.07 | 1.07 | 2  |
| LanC-like protein 2                                    | Q9JJK2 | 0.90692 | 1.00 | 1.00 | 5  |

|                                                                   |        |         |      |      |    |
|-------------------------------------------------------------------|--------|---------|------|------|----|
| Protein NipSnap homolog 1                                         | O55125 | 0.90692 | 0.88 | 1.13 | 4  |
| Long-chain-fatty-acid--CoA ligase 6                               | Q91WC3 | 0.90790 | 0.96 | 1.04 | 3  |
| 60S ribosomal protein L18a                                        | P62717 | 0.90790 | 0.97 | 1.03 | 6  |
| Calcium-binding protein 2                                         | Q9JLK4 | 0.90790 | 0.92 | 1.09 | 2  |
| Calcium-binding protein 1                                         | Q9JLK7 |         |      |      |    |
| V-type proton ATPase subunit C 2                                  | Q99L60 | 0.90854 | 1.01 | 1.01 | 7  |
| V-type proton ATPase subunit C 1                                  | Q9Z1G3 |         |      |      |    |
| 14-3-3 protein zeta/delta                                         | P63101 | 0.90854 | 1.02 | 1.02 | 7  |
| Bile salt sulfotransferase 2                                      | P50236 | 0.90887 | 1.11 | 1.11 | 2  |
| Bile salt sulfotransferase 1                                      | P52843 |         |      |      |    |
| Cytosolic carboxypeptidase 4                                      | Q09M05 |         |      |      |    |
| 40S ribosomal protein S16                                         | P14131 | 0.90934 | 0.92 | 1.08 | 2  |
| Phosphatidylinositol 3-kinase regulatory subunit alpha            | P26450 | 0.90948 | 0.71 | 1.42 | 2  |
| Septin-2                                                          | P42208 | 0.90948 | 0.94 | 1.06 | 21 |
| 14-3-3 protein beta/alpha                                         | Q9CQV8 | 0.90994 | 0.80 | 1.24 | 6  |
| cGMP-dependent protein kinase 1                                   | P0C605 | 0.91794 | 0.96 | 1.04 | 7  |
| cGMP-dependent protein kinase 2                                   | Q61410 |         |      |      |    |
| MTSS1-like protein                                                | Q6P9S0 | 0.91794 | 0.95 | 1.06 | 4  |
| 60S ribosomal protein L5                                          | P47962 | 0.91794 | 1.40 | 1.40 | 2  |
| Guanine nucleotide-binding protein G(I)/G(S)/G(T) subunit alpha-1 | P62874 | 0.91802 | 0.86 | 1.16 | 2  |
| Guanine nucleotide-binding protein G(I)/G(S)/G(T) subunit alpha-2 | Q61011 |         |      |      |    |
| EGF-like repeat and discoidin I-like domain-containing protein 1  | O35474 | 0.91802 | 0.96 | 1.04 | 4  |
| Hemicentin-1                                                      | D3YXG0 | 0.91802 | 0.97 | 1.03 | 2  |
| Phosphatidylinositol 4,5-bisphosphate 3-kinase catalytic subunit  | P42337 |         |      |      |    |
| Glycine receptor subunit beta                                     | P48168 | 0.91835 | 0.93 | 1.07 | 2  |
| Glycine receptor subunit alpha-2                                  | Q7TNC8 |         |      |      |    |
| Glycine receptor subunit alpha-1                                  | Q64018 |         |      |      |    |
| Glycine receptor subunit alpha-3                                  | Q91XP5 |         |      |      |    |
| Methyl-CpG-binding protein 2                                      | Q9Z2D6 | 0.91836 | 0.86 | 1.16 | 6  |
| NADH dehydrogenase [ubiquinone] 1 beta subcomplex 1               | Q9CPU2 | 0.91836 | 0.92 | 1.09 | 3  |
| NADH dehydrogenase [ubiquinone] flavoprotein 2, mitochondrial     | Q9D6J6 | 0.91878 | 0.95 | 1.05 | 7  |
| NADH dehydrogenase [ubiquinone] 1 alpha subcomplex 1              | Q9D1H6 | 0.91921 | 0.99 | 1.01 | 5  |
| ATP synthase subunit O, mitochondrial                             | Q9DB20 | 0.91986 | 1.04 | 1.04 | 8  |



|                                                             |        |         |      |      |    |
|-------------------------------------------------------------|--------|---------|------|------|----|
| Tyrosine--tRNA ligase, mitochondrial                        | Q8BYL4 | 0.91986 | 0.71 | 1.42 | 3  |
| Copine-8                                                    | Q9DC53 | 0.91986 | 1.07 | 1.07 | 7  |
| 1-acyl-sn-glycerol-3-phosphate acyltransferase epsilon      | Q9D1E8 | 0.92005 | 1.03 | 1.03 | 2  |
| Trifunctional enzyme subunit beta                           | Q99JY0 | 0.92005 | 0.96 | 1.04 | 4  |
| Retinol dehydrogenase 13                                    | Q8CEE7 | 0.92089 | 1.05 | 1.05 | 2  |
| Translation factor Guf1, mitochondrial                      | Q8C3X4 | 0.92089 | 1.09 | 1.09 | 3  |
| Protein turtle homolog B                                    | E9PZ19 | 0.92137 | 0.90 | 1.11 | 3  |
| Protein kinase C alpha type                                 | P20444 | 0.92137 | 1.02 | 1.02 | 10 |
| Synaptotagmin-4                                             | P40749 |         |      |      |    |
| Cullin-associated NEDD8-dissociated protein 1               | Q6ZQ38 | 0.92137 | 0.92 | 1.09 | 6  |
| Protein spire homolog 1                                     | Q52KF3 | 0.92172 | 1.03 | 1.03 | 7  |
| 28S ribosomal protein S36, mitochondrial                    | Q9CQX8 | 0.92172 | 1.04 | 1.04 | 4  |
| Unconventional myosin-Ic                                    | Q9WTI7 | 0.92179 | 1.08 | 1.08 | 9  |
| D-amino-acid oxidase                                        | P18894 | 0.92296 | 1.23 | 1.23 | 3  |
| Serine/threonine-protein phosphatase 2A catalytic subunit   | P62715 | 0.92296 | 0.99 | 1.01 | 4  |
| Serine/threonine-protein phosphatase 2A catalytic subunit   | P63330 |         |      |      |    |
| Protein unc-13 homolog C                                    | Q8K0T7 | 0.92336 | 0.97 | 1.03 | 7  |
| [Pyruvate dehydrogenase (acetyl-transferring)] kinase       | Q922H2 | 0.92342 | 1.04 | 1.04 | 10 |
| Hemogen                                                     | Q9ERZ0 |         |      |      |    |
| Casein kinase I isoform delta                               | Q9DC28 | 0.92342 | 0.90 | 1.11 | 2  |
| Gap junction beta-1 protein                                 | P28230 | 0.92342 | 0.87 | 1.15 | 2  |
| Glutamine synthetase                                        | P15105 | 0.92342 | 1.10 | 1.10 | 8  |
| Neural Wiskott-Aldrich syndrome protein                     | Q91YD9 | 0.92354 | 0.98 | 1.02 | 8  |
| Serine/threonine-protein kinase TAO2                        | Q6ZQ29 | 0.92354 | 0.94 | 1.06 | 9  |
| Disintegrin and metalloproteinase domain-containing protein | Q9R1V4 | 0.92371 | 0.99 | 1.01 | 4  |
| 60S ribosomal protein L6                                    | P47911 | 0.92371 | 1.08 | 1.08 | 10 |
| L-lactate dehydrogenase B chain                             | P16125 | 0.92371 | 1.10 | 1.10 | 2  |
| Voltage-dependent calcium channel gamma-8 subunit           | Q8VHW2 | 0.92395 | 0.94 | 1.06 | 3  |
| Very-long-chain (3R)-3-hydroxyacyl-CoA dehydratase          | Q8K2C9 | 0.92405 | 1.01 | 1.01 | 8  |
| Methylglutaconyl-CoA hydratase, mitochondrial               | Q9JLZ3 | 0.92405 | 0.93 | 1.07 | 7  |
| Immunoglobulin superfamily member 8                         | Q8R366 | 0.92421 | 0.98 | 1.02 | 10 |
| Neurochondrin                                               | Q9Z0E0 | 0.92421 | 1.03 | 1.03 | 3  |
| AP-2 complex subunit mu                                     | P84091 | 0.92435 | 0.96 | 1.04 | 13 |

|                                                     |        |         |      |      |    |
|-----------------------------------------------------|--------|---------|------|------|----|
| MICOS complex subunit Mic26                         | Q9DCZ4 | 0.92460 | 0.98 | 1.02 | 4  |
| Succinate dehydrogenase [ubiquinone] flavoprotein s | Q8K2B3 | 0.92499 | 1.08 | 1.08 | 2  |
| Solute carrier family 12 member 5                   | Q91V14 | 0.92596 | 0.98 | 1.02 | 3  |
| Gamma-aminobutyric acid receptor subunit beta-3     | P63080 | 0.92596 | 1.05 | 1.05 | 4  |
| Gamma-aminobutyric acid receptor subunit beta-1     | P50571 |         |      |      |    |
| Gamma-aminobutyric acid receptor subunit beta-2     | P63137 |         |      |      |    |
| V-type proton ATPase subunit B, brain isoform       | P62814 | 0.92631 | 1.05 | 1.05 | 9  |
| Tenascin                                            | Q80YX1 | 0.92671 | 1.14 | 1.14 | 2  |
| Calcium-activated potassium channel subunit alpha-  | Q08460 | 0.92690 | 1.02 | 1.02 | 13 |
| Uncharacterized protein C18orf8 homolog             | Q8VC42 | 0.92797 | 1.02 | 1.02 | 12 |
| Adhesion G protein-coupled receptor B3              | Q80ZF8 | 0.92797 | 0.87 | 1.15 | 8  |
| Tropomodulin-1                                      | P49813 | 0.92797 | 1.05 | 1.05 | 6  |
| Sialidase-4                                         | Q8BZL1 | 0.92797 | 1.01 | 1.01 | 2  |
| Ras-related protein Rab-3D                          | P35276 | 0.92797 | 0.87 | 1.15 | 3  |
| Ras-related protein Rab-3B                          | Q9CZT8 |         |      |      |    |
| Kinesin heavy chain isoform 5C                      | P28738 | 0.92800 | 0.99 | 1.01 | 2  |
| Sideroflexin-1                                      | Q99JR1 | 0.92800 | 0.90 | 1.11 | 2  |
| Hippocalcin-like protein 1                          | P62748 | 0.92813 | 1.03 | 1.03 | 8  |
| Laminin subunit alpha-2                             | Q60675 |         |      |      |    |
| Mitochondrial import inner membrane translocase su  | P62077 | 0.92813 | 0.92 | 1.08 | 2  |
| Putative tyrosine-protein phosphatase auxilin       | Q80TZ3 | 0.92813 | 1.04 | 1.04 | 3  |
| Transcription factor A, mitochondrial               | P40630 | 0.92845 | 0.98 | 1.02 | 2  |
| 60S ribosomal protein L35a                          | O55142 | 0.92845 | 0.99 | 1.01 | 3  |
| Neurabin-2                                          | Q6R891 | 0.92845 | 0.96 | 1.04 | 12 |
| Microtubule-associated protein 2                    | P20357 | 0.92870 | 0.98 | 1.02 | 21 |
| Cerebral cavernous malformationsprotein 2 homolog   | Q8K2Y9 | 0.92870 | 0.99 | 1.01 | 6  |
| Noelin-2                                            | Q8BM13 | 0.92881 | 0.96 | 1.04 | 4  |
| Integral membrane protein 2C                        | Q91VK4 | 0.92915 | 0.91 | 1.10 | 4  |
| Calcium uniporter protein, mitochondrial            | Q3UMR5 | 0.92915 | 0.98 | 1.02 | 2  |
| Barrier-to-autointegration factor                   | O54962 | 0.92927 | 0.88 | 1.14 | 3  |
| Kinesin-like protein KIF2A                          | P28740 | 0.92927 | 0.98 | 1.02 | 12 |
| Calcium-binding protein 39                          | Q06138 | 0.92965 | 1.27 | 1.27 | 2  |
| Superoxide dismutase [Mn], mitochondrial            | P09671 | 0.92985 | 1.05 | 1.05 | 7  |

|                                                        |        |         |      |      |    |
|--------------------------------------------------------|--------|---------|------|------|----|
| Glucose-6-phosphate isomerase                          | P06745 | 0.92985 | 1.27 | 1.27 | 2  |
| Striatin-4                                             | P58404 | 0.92985 | 1.02 | 1.02 | 2  |
| Sn1-specific diacylglycerol lipase alpha               | Q6WQJ1 | 0.92999 | 0.96 | 1.04 | 3  |
| Metabotropic glutamate receptor 1                      | P97772 | 0.92999 | 0.88 | 1.13 | 2  |
| ATP-dependent RNA helicase DDX3X                       | Q62167 | 0.92999 | 0.87 | 1.14 | 12 |
| ATP-dependent RNA helicase DDX3Y                       | Q62095 |         |      |      |    |
| Putative ATP-dependent RNA helicase PI10               | P16381 |         |      |      |    |
| Probable ATP-dependent RNA helicase DDX5               | Q61656 |         |      |      |    |
| Probable ATP-dependent RNA helicase DDX17              | Q501J6 |         |      |      |    |
| Probable ATP-dependent RNA helicase DDX4               | Q61496 |         |      |      |    |
| Microtubule-associated protein tau                     | P10637 | 0.93001 | 1.01 | 1.01 | 13 |
| Catenin alpha-1                                        | P26231 | 0.93003 | 0.94 | 1.06 | 6  |
| Cytochrome c oxidase subunit 1                         | P00397 | 0.93005 | 0.97 | 1.04 | 5  |
| Myosin phosphatase Rho-interacting protein             | P97434 | 0.93005 | 0.99 | 1.01 | 14 |
| Adenylyl cyclase-associated protein 1                  | P40124 | 0.93023 | 1.04 | 1.04 | 4  |
| Adenylyl cyclase-associated protein 2                  | Q9CYT6 |         |      |      |    |
| 60S ribosomal protein L24                              | Q8BP67 | 0.93023 | 0.62 | 1.61 | 3  |
| Cytochrome b-c1 complex subunit 9                      | Q8R111 | 0.93023 | 0.94 | 1.07 | 5  |
| Ribosome-binding protein 1                             | Q99PL5 | 0.93043 | 1.12 | 1.12 | 2  |
| cAMP-dependent protein kinase type II-alpha regulator  | P12367 | 0.93078 | 0.97 | 1.03 | 4  |
| 60S ribosomal protein L23                              | P62830 | 0.93078 | 0.84 | 1.19 | 2  |
| Inverted formin-2                                      | Q0GNC1 | 0.93097 | 1.02 | 1.02 | 6  |
| F-actin-capping protein subunit beta                   | P47757 | 0.93097 | 0.93 | 1.07 | 5  |
| Plexin-C1                                              | Q9QZC2 | 0.93125 | 0.98 | 1.02 | 7  |
| Signal-induced proliferation-associated 1-like protein | Q80TE4 | 0.93127 | 0.98 | 1.02 | 4  |
| 28S ribosomal protein S29, mitochondrial               | Q9ER88 | 0.93127 | 1.01 | 1.01 | 2  |
| 40S ribosomal protein S10                              | P63325 | 0.93127 | 1.06 | 1.06 | 2  |
| Protein kinase C epsilon type                          | P16054 | 0.93163 | 1.06 | 1.06 | 10 |
| Synaptonemal complex central element protein 1-like    | Q5D525 |         |      |      |    |
| Protein VAC14 homolog                                  | Q80WQ2 | 0.93167 | 1.17 | 1.17 | 4  |
| Contactin-3                                            | Q07409 | 0.93167 | 1.08 | 1.08 | 6  |
| Contactin-4                                            | Q69Z26 |         |      |      |    |
| Redox-regulatory protein FAM213A                       | Q9CYH2 | 0.93186 | 0.50 | 2.02 | 2  |

|                                                      |        |         |      |      |    |
|------------------------------------------------------|--------|---------|------|------|----|
| Stress-70 protein, mitochondrial                     | P38647 | 0.93194 | 0.96 | 1.04 | 4  |
| Dystrobrevin alpha                                   | Q9D2N4 | 0.93194 | 0.87 | 1.15 | 3  |
| Heterogeneous nuclear ribonucleoprotein K            | P61979 | 0.93201 | 0.83 | 1.20 | 5  |
| Disco-interacting protein 2 homolog B                | Q3UH60 | 0.93204 | 0.98 | 1.02 | 24 |
| Potassium voltage-gated channel subfamily A memb     | B2RQA1 | 0.93204 | 1.21 | 1.21 | 4  |
| Potassium voltage-gated channel subfamily A memb     | P16388 |         |      |      |    |
| Mitogen-activated protein kinase 4                   | P97820 | 0.93204 | 0.98 | 1.02 | 9  |
| Misshapen-like kinase 1                              | Q9JM52 |         |      |      |    |
| DmX-like protein 2                                   | Q8BPN8 | 0.93228 | 1.02 | 1.02 | 19 |
| Mitogen-activated protein kinase 3                   | Q99JP0 | 0.93230 | 0.89 | 1.12 | 4  |
| Cadherin-13                                          | Q9WTR5 | 0.93230 | 1.13 | 1.13 | 2  |
| Spectrin beta chain, erythrocytic                    | P15508 | 0.93237 | 0.99 | 1.01 | 30 |
| LRP2-binding protein                                 | Q9D4C6 |         |      |      |    |
| Regulator of microtubule dynamicsprotein 3           | Q3UJU9 | 0.93267 | 1.09 | 1.09 | 7  |
| Formin-like protein 1                                | Q9JL26 | 0.93303 | 1.02 | 1.02 | 3  |
| ATP-binding cassette sub-family D member 3           | P55096 | 0.93303 | 1.03 | 1.03 | 3  |
| Rap guanine nucleotide exchange factor 2             | Q8CHG7 | 0.93306 | 1.04 | 1.04 | 7  |
| Cytochrome b-c1 complex subunit Rieske, mitochond    | Q9CR68 | 0.93376 | 1.19 | 1.19 | 7  |
| Rho guanine nucleotide exchange factor 6             | Q8K4I3 | 0.93376 | 0.92 | 1.09 | 7  |
| Rho guanine nucleotide exchange factor 7             | Q9ES28 |         |      |      |    |
| 60S ribosomal protein L31                            | P62900 | 0.93376 | 0.97 | 1.03 | 2  |
| Alkyldihydroxyacetonephosphate synthase, peroxiso    | Q8C0I1 | 0.93380 | 1.00 | 1.00 | 3  |
| Guanylate cyclase soluble subunitbeta-1              | O54865 | 0.93561 | 0.96 | 1.04 | 2  |
| 1-phosphatidylinositol 4,5-bisphosphate phosphodie   | P51432 | 0.93836 | 0.89 | 1.12 | 9  |
| F-box only protein 2                                 | Q80UW2 | 0.93871 | 1.01 | 1.01 | 3  |
| Fat storage-inducing transmembrane protein 1         | Q91V79 | 0.94046 | 1.01 | 1.01 | 2  |
| APC membrane recruitment protein2                    | Q8CCJ4 | 0.94288 | 0.97 | 1.03 | 4  |
| F-BAR and double SH3 domains protein 1               | Q6PFY1 | 0.94288 | 0.98 | 1.02 | 5  |
| Ankyrin repeat domain-containingprotein 9            | Q8BH83 |         |      |      |    |
| ATP-binding cassette sub-family B member 9           | Q9JJ59 |         |      |      |    |
| Guanine nucleotide-binding protein subunit beta-4    | P29387 | 0.94356 | 1.03 | 1.03 | 5  |
| Guanine nucleotide-binding protein G(I)/G(S)/G(T) su | P62880 |         |      |      |    |
| Cytochrome b-c1 complex subunit 10                   | Q9CPX8 | 0.94356 | 1.01 | 1.01 | 2  |

|                                                                    |        |         |      |      |    |
|--------------------------------------------------------------------|--------|---------|------|------|----|
| MICOS complex subunit Mic60                                        | Q8CAQ8 | 0.94360 | 0.94 | 1.07 | 31 |
| Calcium-binding mitochondrial carrier protein SCA3                 | A2ASZ8 | 0.94386 | 1.01 | 1.01 | 5  |
| U5 small nuclear ribonucleoprotein 200 kDa helicase                | Q6P4T2 | 0.94386 | 1.10 | 1.10 | 9  |
| Cytochrome c1, heme protein, mitochondrial                         | Q9D0M3 |         |      |      |    |
| Protein monoglycylase TTL8                                         | A4Q9F1 | 0.94419 | 0.90 | 1.11 | 10 |
| 40S ribosomal protein S4, X isoform                                | P62702 |         |      |      |    |
| Tyrosine-protein kinase Fer                                        | P70451 | 0.94423 | 0.96 | 1.04 | 2  |
| 40S ribosomal protein S9                                           | Q6ZWN5 | 0.94423 | 0.96 | 1.04 | 10 |
| Actin-binding LIM protein 3                                        | Q69ZX8 | 0.94457 | 0.96 | 1.04 | 10 |
| Potassium-transporting ATPase alpha chain 2                        | Q9Z1W8 | 0.94762 | 1.00 | 1.00 | 21 |
| Sodium/potassium-transporting ATPase subunit alpha                 | Q9WV27 |         |      |      |    |
| Sodium/potassium-transporting ATPase subunit alpha                 | Q6PIE5 |         |      |      |    |
| Potassium-transporting ATPase alpha chain 1                        | Q64436 |         |      |      |    |
| Sodium/potassium-transporting ATPase subunit alpha                 | Q6PIC6 |         |      |      |    |
| Protein enabled homolog                                            | Q03173 | 0.94762 | 1.00 | 1.00 | 7  |
| Mediator of RNA polymerase II transcription subunit 1              | Q6JPI3 | 0.94795 | 0.80 | 1.25 | 2  |
| Histone acetyltransferase KAT2A                                    | Q9JHD2 |         |      |      |    |
| Serine/threonine-protein kinase mTOR                               | Q9JLN9 | 0.95032 | 0.89 | 1.12 | 5  |
| Myosin regulatory light polypeptide 9                              | Q9CQ19 | 0.95032 | 1.04 | 1.04 | 11 |
| Myosin regulatory light chain 10                                   | Q62082 |         |      |      |    |
| Myosin regulatory light chain 2,ventricular/cardiac muscle isoform | P51667 |         |      |      |    |
| Myosin regulatory light chain 2,skeletal muscle isoform            | P97457 |         |      |      |    |
| Myosin regulatory light chain 12B                                  | Q3THE2 |         |      |      |    |
| Retinoic acid receptor gamma                                       | P18911 | 0.95032 | 1.04 | 1.04 | 2  |
| Thioredoxin reductase 3                                            | Q99MD6 |         |      |      |    |
| Forkhead box protein H1                                            | O88621 |         |      |      |    |
| V-type proton ATPase subunit F                                     | Q9D1K2 | 0.95064 | 1.03 | 1.03 | 3  |
| Casein kinase II subunit alpha                                     | Q60737 | 0.95089 | 0.96 | 1.04 | 19 |
| Cytoplasmic dynein 1 light intermediate chain 1                    | Q8R1Q8 | 0.95089 | 0.93 | 1.08 | 7  |
| NADH dehydrogenase [ubiquinone] 1beta subcomplex                   | Q9CQZ6 | 0.95162 | 1.00 | 1.00 | 2  |
| MAP/microtubule affinity-regulating kinase 4                       | Q8CIP4 | 0.95162 | 0.98 | 1.02 | 5  |
| Peroxiredoxin-1                                                    | P35700 | 0.95186 | 0.94 | 1.06 | 10 |
| Actin-related protein 2/3 complex subunit 2                        | Q9CVB6 | 0.95186 | 0.93 | 1.08 | 12 |

|                                                            |        |         |      |      |    |
|------------------------------------------------------------|--------|---------|------|------|----|
| Nucleosome assembly protein 1-like 1                       | P28656 | 0.95186 | 0.92 | 1.08 | 4  |
| ELKS/Rab6-interacting/CAST family member 1                 | Q99MI1 | 0.95234 | 1.04 | 1.04 | 9  |
| Vacuolar protein sorting-associated protein 37C            | Q8R105 | 0.95490 | 0.93 | 1.08 | 3  |
| Calcium uptake protein 1, mitochondrial                    | Q8VCX5 | 0.95522 | 1.07 | 1.07 | 2  |
| CKLF-like MARVEL transmembrane domain-containing protein 1 | Q9D6G9 | 0.95857 | 0.92 | 1.09 | 4  |
| Protein tyrosine phosphatase type IVA 2                    | O70274 | 0.95857 | 0.98 | 1.02 | 2  |
| Cytochrome c oxidase subunit 4 isoform 1, mitochondrial    | P19783 | 0.95919 | 1.00 | 1.00 | 8  |
| Mitochondrial carrier homolog 2                            | Q791V5 | 0.95919 | 0.93 | 1.08 | 12 |
| Neuronal tyrosine-phosphorylated phosphoinositide-3-kinase | Q6PFX7 | 0.96032 | 0.93 | 1.07 | 4  |
| Dystrophia myotonica WD repeat-containing protein 1        | Q08274 | 0.96032 | 1.02 | 1.02 | 6  |
| Cytochrome b-c1 complex subunit 8                          | Q9CQ69 | 0.96074 | 1.00 | 1.00 | 8  |
| FERM, RhoGEF and pleckstrin domain-containing protein 1    | F8VPU2 | 0.96074 | 0.60 | 1.66 | 2  |
| Numb-like protein                                          | O08919 | 0.96074 | 1.02 | 1.02 | 3  |
| Limbic system-associated membrane protein                  | Q8BLK3 | 0.96074 | 0.99 | 1.01 | 13 |
| Hemoglobin subunit alpha                                   | P01942 | 0.96105 | 0.78 | 1.28 | 2  |
| Hemoglobin subunit zeta                                    | P06467 |         |      |      |    |
| Phosphatase and actin regulator 3                          | Q8BYK5 | 0.96194 | 0.89 | 1.12 | 6  |
| Phosphatase and actin regulator 1                          | Q2M3X8 |         |      |      |    |
| Phosphatase and actin regulator 4                          | Q501J7 |         |      |      |    |
| Voltage-dependent anion-selective channel protein 1        | Q60932 | 0.96194 | 0.93 | 1.07 | 23 |
| Krev interaction trapped protein 1                         | Q6S5J6 | 0.96194 | 1.03 | 1.03 | 2  |
| 60S ribosomal protein L14                                  | Q9CR57 | 0.96197 | 0.95 | 1.06 | 5  |
| Myelin protein P0                                          | P27573 | 0.96311 | 0.97 | 1.03 | 9  |
| V-type proton ATPase subunit d 1                           | P51863 | 0.96311 | 0.95 | 1.05 | 14 |
| V-type proton ATPase subunit d 2                           | Q80SY3 |         |      |      |    |
| Cytochrome c, somatic                                      | P62897 | 0.96311 | 1.10 | 1.10 | 7  |
| Wiskott-Aldrich syndrome protein family member 2           | Q8BH43 | 0.96329 | 1.00 | 1.00 | 12 |
| Wiskott-Aldrich syndrome protein family member 1           | Q8R5H6 |         |      |      |    |
| ATP-dependent 6-phosphofructokinase, platelet type 1       | Q9WUA3 | 0.96329 | 1.03 | 1.03 | 5  |
| Engulfment and cell motility protein 2                     | Q8BHL5 | 0.96329 | 0.96 | 1.04 | 18 |
| Disabled homolog 1                                         | P97318 | 0.96338 | 1.01 | 1.01 | 2  |
| Palmitoyl-protein thioesterase 1                           | O88531 | 0.96338 | 1.01 | 1.01 | 4  |
| MAP7 domain-containing protein 2                           | A2AG50 | 0.96338 | 0.98 | 1.02 | 9  |

|                                                       |        |         |      |      |    |
|-------------------------------------------------------|--------|---------|------|------|----|
| E3 ubiquitin-protein ligase TTC3                      | O88196 |         |      |      |    |
| Actin-related protein 2                               | P61161 | 0.96340 | 0.96 | 1.05 | 4  |
| Raftlin                                               | Q6A0D4 | 0.96356 | 1.00 | 1.00 | 9  |
| Endophilin-A2                                         | Q62419 | 0.96364 | 1.23 | 1.23 | 3  |
| Endophilin-A1                                         | Q62420 |         |      |      |    |
| Neurofilament light polypeptide                       | P08551 | 0.96364 | 0.93 | 1.08 | 44 |
| Calmodulin                                            | P62204 | 0.96364 | 0.94 | 1.06 | 11 |
| Calmodulin-like protein 3                             | Q9D6P8 |         |      |      |    |
| Serine/threonine-protein kinase A                     | P04627 | 0.96364 | 1.08 | 1.08 | 2  |
| MAP6 domain-containing protein 1                      | Q14BB9 | 0.96366 | 0.96 | 1.04 | 4  |
| MAP/microtubule affinity-regulating kinase 3          | Q03141 | 0.96377 | 0.94 | 1.06 | 4  |
| Galactocerebrosidase                                  | P54818 | 0.96377 | 0.96 | 1.04 | 5  |
| BTB/POZ domain-containing protein KCTD8               | Q50H33 | 0.96377 | 1.04 | 1.04 | 3  |
| NADH dehydrogenase [ubiquinone] 1 alpha subcomp       | Q9CQ91 | 0.96377 | 0.98 | 1.02 | 3  |
| Protein arginine N-methyltransferase 8                | Q6PAK3 | 0.96393 | 0.91 | 1.10 | 3  |
| Galectin-8                                            | Q9JL15 | 0.96409 | 1.08 | 1.08 | 2  |
| Histone-lysine N-methyltransferase 2B                 | O08550 | 0.96409 | 0.99 | 1.01 | 2  |
| Voltage-dependent L-type calcium channel subunit beta | Q8R3Z5 | 0.96421 | 1.04 | 1.04 | 2  |
| Double-stranded RNA-specific adenosine deaminase      | Q99MU3 |         |      |      |    |
| Calcium-binding mitochondrial carrier protein Aralar1 | Q8BH59 | 0.96437 | 1.01 | 1.01 | 49 |
| Abl interactor 2                                      | P62484 | 0.96449 | 1.02 | 1.02 | 3  |
| LETM1 and EF-hand domain-containing protein 1, m      | Q9Z2I0 | 0.96465 | 0.85 | 1.18 | 2  |
| Vam6/Vps39-like protein                               | Q8R5L3 | 0.96476 | 1.00 | 1.00 | 11 |
| Acyl-coenzyme A thioesterase THEM4                    | Q3UUI3 | 0.96477 | 0.99 | 1.01 | 3  |
| Regulator of G-protein signaling 20                   | Q9QZB1 | 0.96477 | 1.01 | 1.01 | 2  |
| 60S acidic ribosomal protein P1                       | P47955 | 0.96481 | 1.04 | 1.04 | 2  |
| DOMON domain-containing protein FRRS1L                | B1AXV0 | 0.96485 | 1.00 | 1.00 | 2  |
| 60S ribosomal protein L7a                             | P12970 | 0.96485 | 1.05 | 1.05 | 6  |
| Transmembrane and TPR repeat-containing protein 3     | Q8BRH0 | 0.96492 | 0.99 | 1.01 | 2  |
| Ras-related protein R-Ras2                            | P62071 | 0.96495 | 1.05 | 1.05 | 6  |
| Multivesicular body subunit 12B                       | Q6KAU4 | 0.96503 | 0.88 | 1.14 | 2  |
| Ras-related protein Rab-12                            | P35283 | 0.96503 | 1.01 | 1.01 | 6  |
| Ras-related protein Rab-37                            | Q9JKM7 |         |      |      |    |

|                                                               |        |         |      |      |    |
|---------------------------------------------------------------|--------|---------|------|------|----|
| Ras-related protein Rab-4B                                    | Q91ZR1 |         |      |      |    |
| Ras-related protein Rab-43                                    | Q8CG50 |         |      |      |    |
| Ras-related protein Rab-4A                                    | P56371 |         |      |      |    |
| Ras-related protein Rab-30                                    | Q923S9 |         |      |      |    |
| Ras-related protein Rab-9B                                    | Q8BHH2 |         |      |      |    |
| Casein kinase II subunit beta                                 | P67871 | 0.96506 | 0.97 | 1.03 | 4  |
| Protein phosphatase 1H                                        | Q3UYC0 | 0.96514 | 0.98 | 1.02 | 11 |
| Protein phosphatase 1M                                        | Q8BU27 |         |      |      |    |
| Cysteine-rich protein 2                                       | Q9DCT8 | 0.96543 | 0.94 | 1.07 | 5  |
| Cadherin-10                                                   | P70408 | 0.96549 | 1.03 | 1.03 | 5  |
| Vesicular glutamate transporter 3                             | Q8BFU8 | 0.96549 | 1.37 | 1.37 | 2  |
| Vesicular glutamate transporter 1                             | Q3TXX4 |         |      |      |    |
| Sodium-dependent phosphate transport protein 3                | Q5SZA1 |         |      |      |    |
| Vesicular glutamate transporter 2                             | Q8BLE7 |         |      |      |    |
| Sodium-dependent phosphate transport protein 1                | Q61983 |         |      |      |    |
| Serine/threonine-protein kinase SIK3                          | Q6P4S6 | 0.96549 | 0.92 | 1.09 | 2  |
| Dynamin-1-like protein                                        | Q8K1M6 | 0.96555 | 0.91 | 1.10 | 13 |
| Vimentin                                                      | P20152 | 0.96555 | 0.91 | 1.10 | 10 |
| Desmin                                                        | P31001 |         |      |      |    |
| Profilin-1                                                    | P62962 | 0.96574 | 1.27 | 1.27 | 2  |
| Pyrroline-5-carboxylate reductase2                            | Q922Q4 | 0.96574 | 0.92 | 1.09 | 10 |
| Pyrroline-5-carboxylate reductase1, mitochondrial             | Q922W5 |         |      |      |    |
| Neuron-specific calcium-binding protein hippocalcin           | P84075 | 0.96575 | 1.08 | 1.08 | 4  |
| N-terminal EF-hand calcium-binding protein 2                  | Q91ZP9 |         |      |      |    |
| Dihydropyrimidinase-related protein 2                         | O08553 | 0.96575 | 0.96 | 1.04 | 14 |
| Sodium/potassium-transporting ATPase subunit beta             | P14094 | 0.96575 | 1.04 | 1.04 | 8  |
| Pyruvate dehydrogenase E1 component subunit beta              | Q9D051 | 0.96603 | 1.00 | 1.00 | 8  |
| Septin-8                                                      | Q8CHH9 | 0.96626 | 1.04 | 1.04 | 27 |
| DnaJ homolog subfamily A member 2                             | Q9QYJ0 | 0.96636 | 0.99 | 1.01 | 8  |
| Ras-related protein Rab-5A                                    | Q9CQD1 | 0.96636 | 0.84 | 1.19 | 2  |
| NADH dehydrogenase [ubiquinone] 1beta subcomplex              | Q9CQJ8 | 0.96636 | 1.07 | 1.07 | 3  |
| Isocitrate dehydrogenase [NAD] subunit gamma 1, mitochondrial | P70404 | 0.96641 | 1.02 | 1.02 | 5  |
| T-complex protein 1 subunit eta                               | P80313 | 0.96644 | 1.65 | 1.65 | 2  |



|                                                       |        |         |      |      |    |
|-------------------------------------------------------|--------|---------|------|------|----|
| Cytochrome c oxidase subunit 6C                       | Q9CPQ1 | 0.96644 | 0.90 | 1.11 | 3  |
| Leucine-rich repeat transmembraneneuronal protein     | Q8BZ81 | 0.96649 | 0.93 | 1.08 | 6  |
| Ganglioside-induced differentiation-associated prote  | O88741 | 0.96649 | 1.01 | 1.01 | 3  |
| NADH dehydrogenase [ubiquinone] 1alpha subcomp        | Q9DCJ5 | 0.96658 | 0.98 | 1.02 | 13 |
| Charged multivesicular body protein 2a                | Q9DB34 | 0.96658 | 0.77 | 1.30 | 2  |
| Tubulin polyglutamylase TTLL7                         | A4Q9F0 | 0.96677 | 1.05 | 1.05 | 20 |
| Astrotactin-2                                         | Q80Z10 |         |      |      |    |
| Cytoplasmic FMR1-interacting protein 2                | Q5SQX6 |         |      |      |    |
| Guanine nucleotide-binding protein G(I)/G(S)/G(O) s   | Q9DAS9 | 0.96685 | 1.13 | 1.13 | 3  |
| PH and SEC7 domain-containing protein 2               | Q6P116 | 0.96690 | 1.09 | 1.09 | 2  |
| 60S ribosomal protein L3                              | P27659 | 0.96690 | 0.96 | 1.04 | 7  |
| Dynactin subunit 3                                    | Q9Z0Y1 | 0.96703 | 1.17 | 1.17 | 4  |
| Rho-related GTP-binding protein RhoG                  | P84096 | 0.96703 | 0.96 | 1.05 | 12 |
| Liprin-alpha-2                                        | Q8BSS9 | 0.96712 | 1.01 | 1.01 | 31 |
| KH domain-containing, RNA-binding, signal transduc    | Q9WU01 |         |      |      |    |
| Guanine nucleotide-binding protein subunit alpha-13   | P27601 | 0.96714 | 1.01 | 1.01 | 7  |
| Ankyrin-2                                             | Q8C8R3 | 0.96714 | 1.02 | 1.02 | 62 |
| AFG3-like protein 2                                   | Q8JZQ2 |         |      |      |    |
| Sarcoplasmic/endoplasmic reticulum calcium ATPase     | O55143 | 0.96717 | 1.08 | 1.08 | 5  |
| Sarcoplasmic/endoplasmic reticulum calcium ATPase     | Q8R429 |         |      |      |    |
| 78 kDa glucose-regulated protein                      | P20029 | 0.96724 | 1.01 | 1.01 | 3  |
| Carbonic anhydrase 4                                  | Q64444 | 0.96724 | 1.18 | 1.18 | 5  |
| Reticulon-1                                           | Q8K0T0 | 0.96724 | 0.94 | 1.07 | 3  |
| Vacuolar protein sorting-associated protein 41 homo   | Q5KU39 | 0.96737 | 1.03 | 1.03 | 7  |
| Mitochondrial Rho GTPase 1                            | Q8BG51 | 0.96737 | 0.96 | 1.04 | 6  |
| Radixin                                               | P26043 | 0.96738 | 1.04 | 1.04 | 3  |
| Merlin                                                | P46662 |         |      |      |    |
| High affinity cAMP-specific and IBMX-insensitive 3',5 | O88502 | 0.96750 | 1.00 | 1.00 | 15 |
| DNA topoisomerase 2-alpha                             | Q01320 |         |      |      |    |
| 14-3-3 protein epsilon                                | P62259 | 0.96750 | 0.91 | 1.10 | 5  |
| Sorting and assembly machinery component 50 hom       | Q8BGH2 | 0.96750 | 0.98 | 1.02 | 12 |
| Glutathione S-transferase P 1                         | P19157 | 0.96759 | 1.01 | 1.01 | 2  |
| Glutathione S-transferase P 2                         | P46425 |         |      |      |    |

|                                                          |        |         |      |      |    |
|----------------------------------------------------------|--------|---------|------|------|----|
| Charged multivesicular body prote                        | Q9D8B3 | 0.96759 | 1.03 | 1.03 | 7  |
| N-arachidonyl glycine receptor                           | Q8K1Z6 | 0.96772 | 1.16 | 1.16 | 12 |
| Dedicator of cytokinesis protein8                        | Q8C147 |         |      |      |    |
| Dedicator of cytokinesis protein6                        | Q8VDR9 |         |      |      |    |
| Dedicator of cytokinesis protein7                        | Q8R1A4 |         |      |      |    |
| Creatine kinase B-type                                   | Q04447 | 0.96772 | 0.96 | 1.04 | 9  |
| WD repeat-containing protein 47                          | Q8CGF6 | 0.96784 | 1.05 | 1.05 | 2  |
| Myosin-9                                                 | Q8VDD5 | 0.96784 | 1.01 | 1.01 | 50 |
| Syntaxin-binding protein 1                               | O08599 | 0.96785 | 1.01 | 1.01 | 25 |
| Centrosomal protein of 131 kDa                           | Q62036 |         |      |      |    |
| Bifunctional epoxide hydrolase 2                         | P34914 |         |      |      |    |
| Triple functional domain protein                         | Q0KL02 | 0.96785 | 1.00 | 1.00 | 16 |
| Glycogen [starch] synthase, liver                        | Q8VCB3 |         |      |      |    |
| Coiled-coil domain-containing protein 177                | Q3UHB8 | 0.96790 | 0.99 | 1.01 | 11 |
| Pleckstrin homology domain-containing family A member 1  | Q7TQG1 | 0.96792 | 0.87 | 1.15 | 4  |
| Voltage-dependent N-type calcium channel subunit alpha 1 | O55017 | 0.96793 | 0.96 | 1.05 | 5  |
| XK-related protein 6                                     | E9Q6C8 | 0.96793 | 0.94 | 1.07 | 15 |
| F-actin-uncapping protein LRRC16A                        | Q6EDY6 | 0.96793 | 1.01 | 1.01 | 6  |
| Vacuolar fusion protein CCZ1 homolog                     | Q8C1Y8 | 0.96804 | 1.03 | 1.03 | 10 |
| NADH dehydrogenase [ubiquinone] 1 subunit C2             | Q9CQ54 | 0.96804 | 0.90 | 1.11 | 4  |
| Septin-9                                                 | Q80UG5 | 0.96813 | 0.98 | 1.02 | 29 |
| Mitochondrial fission regulator 1                        | Q9CWE0 | 0.96817 | 0.95 | 1.05 | 4  |
| Amine oxidase [flavin-containing] a                      | Q64133 | 0.96826 | 1.03 | 1.03 | 5  |
| Protein ZNF365                                           | Q8BG89 | 0.96841 | 0.96 | 1.05 | 2  |
| ADP-ribosylation factor-like protein 8B                  | Q9CQW2 | 0.96844 | 0.88 | 1.14 | 2  |
| DnaJ homolog subfamily B member 6                        | O54946 | 0.96855 | 1.06 | 1.06 | 6  |
| DnaJ homolog subfamily B member 7                        | Q9QYI8 |         |      |      |    |
| Protein ELFN1                                            | Q8C8T7 | 0.96871 | 0.83 | 1.20 | 3  |
| Tyrosine-protein kinase Fgr                              | P14234 | 0.96884 | 0.95 | 1.05 | 6  |
| Tyrosine-protein kinase Fyn                              | P39688 |         |      |      |    |
| Vacuolar protein sorting-associated protein 45           | P97390 | 0.96885 | 1.27 | 1.27 | 3  |
| Copine-7                                                 | Q0VE82 | 0.96941 | 1.00 | 1.00 | 10 |
| Gelsolin                                                 | P13020 | 0.96941 | 1.00 | 1.00 | 13 |

|                                                                 |        |         |      |      |    |
|-----------------------------------------------------------------|--------|---------|------|------|----|
| Pyruvate dehydrogenase E1 component subunit alpha               | P35486 | 0.96950 | 0.98 | 1.02 | 19 |
| Sodium/potassium-transporting ATPase subunit beta               | P97370 | 0.96950 | 0.90 | 1.11 | 2  |
| Tripartite motif-containing protein 3                           | Q9R1R2 | 0.96950 | 1.12 | 1.12 | 4  |
| Cytohesin-3                                                     | O08967 | 0.96950 | 0.98 | 1.02 | 4  |
| Cytohesin-1                                                     | Q9QX11 |         |      |      |    |
| Clathrin coat assembly protein AP180                            | Q61548 | 0.96970 | 0.74 | 1.36 | 5  |
| Aconitate hydratase, mitochondrial                              | Q99K10 | 0.96985 | 1.04 | 1.04 | 20 |
| Sodium/potassium-transporting ATPase subunit alpha              | Q8VDN2 | 0.96985 | 0.96 | 1.05 | 9  |
| Band 4,1-like protein 2                                         | O70318 | 0.97015 | 0.93 | 1.08 | 8  |
| Exportin-5                                                      | Q924C1 |         |      |      |    |
| Catechol O-methyltransferase domain-containing protein          | Q8BIG7 | 0.97043 | 1.33 | 1.33 | 3  |
| Cytochrome b-c1 complex subunit 7                               | Q9D855 | 0.97043 | 1.09 | 1.09 | 6  |
| Dolichyl-diphosphooligosaccharide --protein glycosyltransferase | Q9DBG6 | 0.97057 | 1.03 | 1.03 | 2  |
| Spermatogenesis-associated protein 2-like protein               | Q8BNN1 | 0.97069 | 0.64 | 1.55 | 3  |
| Clathrin light chain A                                          | O08585 | 0.97083 | 1.06 | 1.06 | 3  |
| Zinc finger homeobox protein 4                                  | Q9JJN2 | 0.97096 | 1.06 | 1.06 | 2  |
| Tubulin beta-3 chain                                            | Q9ERD7 | 0.97109 | 0.96 | 1.04 | 12 |
| MAP7 domain-containing protein 1                                | A2AJI0 | 0.97134 | 0.93 | 1.08 | 4  |
| BAI1-associated protein 3                                       | Q80TT2 | 0.97134 | 1.03 | 1.03 | 10 |
| T-complex protein 1 subunit delta                               | P80315 | 0.97134 | 0.66 | 1.51 | 3  |
| TBC1 domain family member 24                                    | Q3UUG6 | 0.97174 | 1.01 | 1.01 | 10 |
| ADP-ribosylation factor GTPase-activating protein 2             | Q99K28 | 0.97174 | 0.93 | 1.08 | 4  |
| Fumarate hydratase, mitochondrial                               | P97807 | 0.97197 | 0.98 | 1.02 | 2  |
| Laminin subunit alpha-5                                         | Q61001 | 0.97197 | 1.04 | 1.04 | 2  |
| Ubiquitin carboxyl-terminal hydrolase 43                        | Q8BUM9 | 0.97209 | 0.98 | 1.02 | 24 |
| ATPase family AAA domain-containing protein 3                   | Q92511 |         |      |      |    |
| 5'-AMP-activated protein kinase subunit gamma-2                 | Q91WG5 | 0.97240 | 1.08 | 1.08 | 4  |
| Mitogen-activated protein kinase                                | P63085 | 0.97263 | 1.15 | 1.15 | 3  |
| Mitoguardin-1                                                   | Q4QQM5 | 0.97263 | 0.98 | 1.02 | 3  |
| Ras GTPase-activating protein 4                                 | Q6PFQ7 | 0.97263 | 1.08 | 1.08 | 2  |
| Mitochondrial import inner membrane translocase subunit         | P62075 | 0.97395 | 1.02 | 1.02 | 2  |
| T-complex protein 1 subunit theta                               | P42932 | 0.97412 | 0.98 | 1.02 | 4  |
| Vacuolar fusion protein MON1 homolog A                          | Q6PDG8 | 0.97412 | 0.97 | 1.03 | 14 |

|                                                                |        |         |      |      |    |
|----------------------------------------------------------------|--------|---------|------|------|----|
| Cytoplasmic dynein 1 intermediate chain 1                      | O88485 | 0.97412 | 1.08 | 1.08 | 2  |
| Isocitrate dehydrogenase [NAD] subunit alpha, mitochondrion    | Q9D6R2 | 0.97421 | 0.63 | 1.59 | 2  |
| GTP-binding protein Di-Ras2                                    | Q5PR73 | 0.97438 | 0.97 | 1.03 | 5  |
| Disintegrin and metalloproteinase domain-containing protein 1  | Q9R1V7 | 0.97463 | 0.97 | 1.03 | 9  |
| Synaptotagmin-1                                                | P46096 | 0.97488 | 1.03 | 1.03 | 14 |
| Synaptotagmin-5                                                | Q9R0N5 |         |      |      |    |
| cAMP-specific 3',5'-cyclic phosphodiesterase 4A                | O89084 | 0.97569 | 1.03 | 1.03 | 3  |
| cAMP-specific 3',5'-cyclic phosphodiesterase 4D                | Q01063 |         |      |      |    |
| Serine/threonine-protein kinase C hκ1                          | O35280 | 0.97569 | 0.81 | 1.23 | 2  |
| Aurora kinase C                                                | O88445 |         |      |      |    |
| Aurora kinase A                                                | P97477 |         |      |      |    |
| Aurora kinase B                                                | O70126 |         |      |      |    |
| Vesicle-associated membrane protein-associated protein 1       | Q9QY76 | 0.97569 | 1.02 | 1.02 | 2  |
| LETM1 domain-containing protein 1                              | Q924L1 | 0.97628 | 1.09 | 1.09 | 3  |
| Microtubule-associated protein 4                               | P27546 | 0.97700 | 1.02 | 1.02 | 10 |
| Myotubularin                                                   | Q9Z2C5 | 0.97725 | 0.91 | 1.10 | 4  |
| ATPase family AAA domain-containing protein 1                  | Q9D5T0 | 0.97884 | 0.97 | 1.03 | 12 |
| Tropomyosin alpha-1 chain                                      | P58771 | 0.97933 | 0.92 | 1.08 | 2  |
| Aspartate aminotransferase, mitochondrial                      | P05202 | 0.97933 | 1.03 | 1.03 | 31 |
| Protein FAM193A                                                | Q8CGI1 |         |      |      |    |
| Protein FAM193B                                                | Q3U2K0 |         |      |      |    |
| DnaJ homolog subfamily B member 2                              | Q9QYI5 | 0.98417 | 1.08 | 1.08 | 2  |
| Tumor protein D54                                              | Q9CYZ2 | 0.98441 | 0.68 | 1.48 | 2  |
| Protein BRICK1                                                 | Q91VR8 | 0.98574 | 1.04 | 1.04 | 4  |
| Rootletin                                                      | Q8CJ40 | 0.98574 | 0.66 | 1.51 | 4  |
| Gamma-aminobutyric acid type B receptor subunit 1              | Q9WV18 | 0.98574 | 1.04 | 1.04 | 10 |
| ADP-ribosylation factor 6                                      | P62331 | 0.98574 | 0.98 | 1.02 | 6  |
| Protein unc-13 homolog A                                       | Q4KUS2 | 0.98580 | 0.99 | 1.01 | 28 |
| Protein unc-13 homolog B                                       | Q9Z1N9 |         |      |      |    |
| Neural cell adhesion molecule 2                                | O35136 | 0.98597 | 1.03 | 1.03 | 9  |
| MAM domain-containing glycosylphosphatidylinositol transferase | P60755 | 0.98619 | 1.35 | 1.35 | 2  |
| Protein lin-7 homolog B                                        | O88951 | 0.98718 | 0.58 | 1.73 | 2  |
| NADH dehydrogenase [ubiquinone] 1 beta subcomplex 1            | Q9CQH3 | 0.98722 | 1.06 | 1.06 | 8  |

|                                                     |        |         |      |      |    |
|-----------------------------------------------------|--------|---------|------|------|----|
| Synaptojanin-2-binding protein                      | Q9D6K5 | 0.98722 | 1.00 | 1.00 | 2  |
| Serine/threonine-protein phosphatase 2A 65 kDa reg  | Q76MZ3 | 0.98722 | 1.07 | 1.07 | 16 |
| Serine/threonine-protein phosphatase 2A 65 kDa reg  | Q7TNP2 |         |      |      |    |
| Anionic trypsin-2                                   | P07146 | 0.98725 | 0.96 | 1.04 | 3  |
| Nucleosome assembly protein 1-like 4                | Q78ZA7 | 0.98725 | 1.05 | 1.05 | 3  |
| Neurexin-3                                          | Q6P9K9 | 0.98727 | 0.95 | 1.05 | 5  |
| Neurexin-3-beta                                     | Q8C985 |         |      |      |    |
| Nuclease EXOG, mitochondrial                        | Q8C163 | 0.98727 | 1.04 | 1.04 | 7  |
| Voltage-dependent anion-selective channel protein 3 | Q60931 | 0.98742 | 0.99 | 1.01 | 19 |
| Inactive ubiquitin carboxyl-terminal hydrolase 54   | Q8BL06 | 0.98746 | 1.20 | 1.20 | 2  |
| Potassium/sodium hyperpolarization-activated cyclic | O88703 | 0.98750 | 1.01 | 1.01 | 5  |
| Regulating synaptic membrane exocytosis protein 2   | Q9EQZ7 | 0.98767 | 0.97 | 1.03 | 31 |
| Talin-2                                             | Q71LX4 | 0.98767 | 0.98 | 1.02 | 3  |
| Dehydrogenase/reductase SDR family member 1         | Q99L04 | 0.98767 | 1.01 | 1.01 | 5  |
| ATP-dependent DNA helicase Q4                       | Q75NR7 | 0.98770 | 0.98 | 1.02 | 80 |
| SRC kinase signaling inhibitor 1                    | Q9QWI6 |         |      |      |    |
| Glycogen synthase kinase-3 alpha                    | Q2NL51 | 0.98774 | 1.01 | 1.01 | 10 |
| Glycogen synthase kinase-3 beta                     | Q9WV60 |         |      |      |    |
| NADH dehydrogenase [ubiquinone] 1beta subcomplex    | Q9DCS9 | 0.98790 | 0.94 | 1.07 | 8  |
| Synaptotagmin-2                                     | P46097 | 0.98793 | 1.18 | 1.18 | 5  |
| Synaptotagmin-8                                     | Q9R0N6 |         |      |      |    |
| Ubiquitin-protein ligase E3B                        | Q9ES34 | 0.98797 | 0.95 | 1.05 | 5  |
| ATP-citrate synthase                                | Q91V92 | 0.98809 | 1.07 | 1.07 | 7  |
| T-complex protein 1 subunit beta                    | P80314 | 0.98809 | 1.04 | 1.04 | 2  |
| Protein SCA1                                        | Q8C8N2 | 0.98851 | 1.00 | 1.00 | 26 |
| Dynactin subunit 4                                  | Q8CBY8 | 0.98851 | 1.26 | 1.26 | 3  |
| 40S ribosomal protein S18                           | P62270 | 0.98851 | 1.16 | 1.16 | 2  |
| AP-3 complex subunit mu-2                           | Q8R2R9 | 0.98859 | 0.57 | 1.75 | 3  |
| AP-3 complex subunit mu-1                           | Q9JKC8 |         |      |      |    |
| Leucine-rich repeat LGI family member 3             | Q8K406 | 0.98873 | 0.97 | 1.03 | 17 |
| Inositol 1,4,5-trisphosphate receptor type 1        | P11881 | 0.98880 | 1.05 | 1.05 | 8  |
| Phosphoglycerate mutase 2                           | O70250 | 0.98880 | 1.03 | 1.03 | 2  |
| Phosphoglycerate mutase 1                           | Q9DBJ1 |         |      |      |    |

|                                                             |        |         |      |      |    |
|-------------------------------------------------------------|--------|---------|------|------|----|
| Voltage-dependent calcium channel gamma-3 subunit           | Q9JJV5 | 0.98880 | 1.38 | 1.38 | 4  |
| Dihydropyrimidinase-related protein 4                       | O35098 | 0.98882 | 0.84 | 1.19 | 3  |
| Dihydropyrimidinase-related protein 1                       | P97427 |         |      |      |    |
| Triosephosphate isomerase                                   | P17751 | 0.98898 | 0.72 | 1.39 | 2  |
| Protein shisa-6 homolog                                     | Q3UH99 | 0.98898 | 0.69 | 1.46 | 6  |
| Vinexin                                                     | Q9R1Z8 | 0.98898 | 1.03 | 1.03 | 2  |
| Leucine-rich repeat LGI family member 2                     | Q8K4Z0 | 0.98898 | 1.15 | 1.15 | 4  |
| Double C2-like domain-containing protein alpha              | Q7TNF0 | 0.98898 | 0.95 | 1.06 | 11 |
| Synapsin-3                                                  | Q8JZP2 | 0.98905 | 1.01 | 1.01 | 18 |
| General receptor for phosphoinositides 1-associated         | Q9JJA9 | 0.98921 | 1.04 | 1.04 | 3  |
| Aquaporin-4                                                 | P55088 | 0.98928 | 0.86 | 1.16 | 4  |
| Inward rectifier potassium channel 4                        | P52189 | 0.98928 | 0.86 | 1.16 | 8  |
| CLIP-associating protein 1                                  | Q80TV8 | 0.98950 | 0.95 | 1.06 | 8  |
| Splicing factor 3B subunit 1                                | Q99NB9 |         |      |      |    |
| N-alpha-acetyltransferase 25, NatB auxiliary subunit        | Q8BWZ3 |         |      |      |    |
| Coiled-coil domain-containing protein 172                   | Q810N9 |         |      |      |    |
| Adenylate cyclase type 10                                   | Q8C0T9 | 0.98950 | 1.06 | 1.06 | 2  |
| 60S ribosomal protein L19                                   | P84099 | 0.98950 | 0.86 | 1.16 | 2  |
| FERM domain-containing protein 5                            | Q6P5H6 | 0.98972 | 0.98 | 1.02 | 3  |
| Ras-related protein Rab-2A                                  | P53994 | 0.98973 | 1.04 | 1.04 | 4  |
| Ras-related protein Rab-2B                                  | P59279 |         |      |      |    |
| Guanine nucleotide-binding protein G(i) subunit alpha       | P08752 | 0.98975 | 0.99 | 1.01 | 4  |
| Guanine nucleotide-binding protein G(t) subunit alpha       | P50149 |         |      |      |    |
| Annexin A11                                                 | P97384 | 0.98975 | 1.00 | 1.00 | 6  |
| IQ motif and SEC7 domain-containing protein 1               | Q8R0S2 | 0.98976 | 0.94 | 1.07 | 35 |
| Alpha-actinin-2                                             | Q9JI91 | 0.98976 | 0.99 | 1.01 | 18 |
| Amyloid beta A4 precursor protein-binding family B member 1 | Q9QXJ1 | 0.98976 | 1.05 | 1.05 | 2  |
| Pyruvate kinase PKM                                         | P52480 | 0.98979 | 1.00 | 1.00 | 8  |
| E3 ubiquitin-protein ligase DTX1                            | Q61010 | 0.98979 | 1.03 | 1.03 | 2  |
| ATP synthase subunit gamma                                  | Q91VR2 | 0.98991 | 1.03 | 1.03 | 8  |
| Glutamate receptor-interacting protein 1                    | Q925T6 | 0.98991 | 1.01 | 1.01 | 9  |
| Cytochrome b-c1 complex subunit 6                           | P99028 | 0.98994 | 1.06 | 1.06 | 5  |
| Phosphatidylserine decarboxylase proenzyme, mitochondrial   | Q8BSF4 | 0.98997 | 0.91 | 1.09 | 2  |

|                                                     |        |         |      |      |     |
|-----------------------------------------------------|--------|---------|------|------|-----|
| Excitatory amino acid transporter 1                 | P56564 | 0.98999 | 1.21 | 1.21 | 6   |
| Ras-related protein Rab-8B                          | P61028 | 0.99002 | 1.07 | 1.07 | 2   |
| Cytochrome c oxidase subunit 6B1                    | P56391 | 0.99019 | 0.96 | 1.04 | 6   |
| Thy-1 membrane glycoprotein                         | P01831 | 0.99021 | 1.00 | 1.00 | 19  |
| Mitochondrial ribosome-associatedGTPase 1           | Q8R2R6 | 0.99038 | 1.00 | 1.00 | 3   |
| Corticotropin-releasing factor receptor 1           | P35347 | 0.99038 | 1.00 | 1.00 | 2   |
| Splicing factor, arginine/serine-rich 19            | Q5U4C3 |         |      |      |     |
| Beta-glucuronidase                                  | P12265 |         |      |      |     |
| Brevican core protein                               | Q61361 | 0.99044 | 1.09 | 1.09 | 9   |
| Tubulin polymerization-promoting                    | Q7TQD2 | 0.99055 | 0.92 | 1.08 | 14  |
| DCC-interacting protein 13-beta                     | Q8K3G9 | 0.99055 | 0.98 | 1.02 | 251 |
| Uncharacterized protein C5orf34 h                   | Q3UJC8 |         |      |      |     |
| Protein piccolo                                     | Q9QYX7 |         |      |      |     |
| Guanine nucleotide-binding protein G(I)/G(S)/G(O) s | P63213 | 0.99070 | 0.98 | 1.02 | 3   |
| Luc7-like protein 3                                 | Q5SUF2 |         |      |      |     |
| Phospholipase D3                                    | Q35405 | 0.99070 | 1.09 | 1.09 | 3   |
| Ribosomal protein S6 kinase alpha-4                 | Q9Z2B9 | 0.99085 | 0.84 | 1.19 | 2   |
| Ribosomal protein S6 kinase alpha-2                 | Q9WUT3 |         |      |      |     |
| Ribosomal protein S6 kinase alpha-3                 | P18654 |         |      |      |     |
| Ribosomal protein S6 kinase alpha-1                 | P18653 |         |      |      |     |
| Ribosomal protein S6 kinase alpha-6                 | Q7TPS0 |         |      |      |     |
| Integrin alpha-D                                    | Q3V0T4 | 0.99085 | 0.98 | 1.02 | 3   |
| Solute carrier family 25 member 51                  | Q5HZI9 |         |      |      |     |
| Leucine zipper protein 1                            | Q8R4U7 | 0.99085 | 1.08 | 1.08 | 3   |
| NADH dehydrogenase [ubiquinone] iron-sulfur protei  | Q99LY9 | 0.99093 | 1.09 | 1.09 | 5   |
| Exocyst complex component 4                         | Q35382 | 0.99106 | 0.95 | 1.05 | 20  |
| Phosphoglycerate kinase 2                           | P09041 | 0.99116 | 0.81 | 1.23 | 3   |
| Phosphoglycerate kinase 1                           | P09411 |         |      |      |     |
| Serine/threonine-protein kinase DCLK2               | Q6PGN3 | 0.99119 | 1.05 | 1.05 | 7   |
| Synaptogyrin-3                                      | Q8R191 | 0.99129 | 1.05 | 1.05 | 3   |
| Myosin-14                                           | Q6URW6 | 0.99139 | 1.01 | 1.01 | 68  |
| 28S ribosomal protein S22, mitochondrial            | Q9CXW2 | 0.99213 | 0.75 | 1.33 | 2   |
| Gamma-aminobutyric acid receptorsubunit gamma-2     | P22723 | 0.99231 | 1.00 | 1.00 | 4   |

|                                                 |        |         |      |      |    |
|-------------------------------------------------|--------|---------|------|------|----|
| Gamma-aminobutyric acid receptorsubunit gamma-1 | Q9R0Y8 |         |      |      |    |
| Clusterin                                       | Q06890 | 0.99231 | 1.05 | 1.05 | 4  |
| Copine-9                                        | Q1RLL3 | 0.99275 | 1.03 | 1.03 | 8  |
| 60S acidic ribosomal protein P0                 | P14869 | 0.99298 | 1.00 | 1.00 | 11 |
| Cyclin-Y                                        | Q8BGU5 | 0.99362 | 0.97 | 1.04 | 3  |
| Elongation factor 1-alpha 1                     | P10126 | 0.99362 | 1.02 | 1.02 | 16 |
| Microtubule-actin cross-linking factor 1        | Q9QXZ0 | 0.99363 | 1.02 | 1.02 | 67 |
| Secretory carrier-associated membrane protein 5 | Q9JKD3 | 0.99363 | 0.69 | 1.45 | 2  |
| Serine/threonine-protein kinase PAK 1           | O88643 | 0.99363 | 0.79 | 1.26 | 2  |
| Serine/threonine-protein kinase PAK 2           | Q8CIN4 |         |      |      |    |
| Calmin                                          | Q8C5W0 | 0.99385 | 0.95 | 1.05 | 17 |
| 60S ribosomal protein L15                       | Q9CZM2 | 0.99406 | 0.96 | 1.04 | 10 |
| Elongation factor Tu, mitochondrial             | Q8BFR5 | 0.99427 | 1.00 | 1.00 | 16 |
| Junction plakoglobin                            | Q02257 | 0.99511 | 1.02 | 1.02 | 13 |
| Interleukin-1 receptor accessory protein        | Q61730 | 0.99511 | 0.67 | 1.49 | 2  |
| 14-3-3 protein gamma                            | P61982 | 0.99680 | 0.90 | 1.12 | 6  |
| Cysteine and glycine-rich protein1              | P97315 | 0.99680 | 1.02 | 1.02 | 5  |
| Titin                                           | A2ASS6 | 0.99701 | 1.01 | 1.01 | 2  |
| Interferon-induced GTP-binding protein Mx1      | P09922 | 0.99848 | 0.99 | 1.01 | 2  |
| 26S proteasome non-ATPase regulatory subunit 12 | Q9D8W5 |         |      |      |    |
| Tropomyosin alpha-3 chain                       | P21107 | 0.99973 | 0.94 | 1.06 | 3  |
| Tropomyosin beta chain                          | P58774 |         |      |      |    |
| Apoptosis-inducing factor 3                     | Q3TY86 | 0.99994 | 1.11 | 1.11 | 8  |
| CB1 cannabinoid receptor-interacting protein 1  | Q5M8N0 | 1.00000 | 0.97 | 1.03 | 3  |
| NADH dehydrogenase [ubiquinone] 1 alpha subcomp | Q9CQZ5 | 1.00000 | 0.96 | 1.04 | 7  |
| Dedicator of cytokinesis protein 3              | Q8CIQ7 | 1.00000 | 1.04 | 1.04 | 6  |
| Cytochrome c oxidase subunit 5B,mitochondrial   | P19536 | 1.00000 | 0.83 | 1.21 | 3  |
| 60S ribosomal protein L4                        | Q9D8E6 | 1.00000 | 1.00 | 1.00 | 14 |
| Centrosomal protein of 97 kDa                   | Q9CZ62 | 1.00000 | 1.01 | 1.01 | 2  |
| 60S ribosomal protein L23a                      | P62751 | 1.00000 | 0.97 | 1.03 | 3  |
| Prosaposin                                      | Q61207 | 1.00000 | 1.26 | 1.26 | 2  |
| Glutamate dehydrogenase 1, mitochondrial        | P26443 | 1.00000 | 1.00 | 1.00 | 19 |
| WD repeat-containing protein 48                 | Q8BH57 | 1.00000 | 0.97 | 1.03 | 12 |



|                                                       |        |         |      |      |    |
|-------------------------------------------------------|--------|---------|------|------|----|
| Formin-like protein 2                                 | A2APV2 | 1.00000 | 0.98 | 1.02 | 29 |
| Formin-like protein 3                                 | Q6ZPF4 |         |      |      |    |
| Ubiquitin carboxyl-terminal hydrolase CYLD            | Q80TQ2 | 1.00000 | 0.97 | 1.03 | 13 |
| Disks large homolog 1                                 | Q811D0 | 1.00000 | 0.99 | 1.01 | 21 |
| Unconventional myosin-le                              | E9Q634 | 1.00000 | 1.08 | 1.08 | 4  |
| Unconventional myosin-lf                              | P70248 |         |      |      |    |
| Phosphatidylinositol-binding clathrin assembly protei | Q7M6Y3 | 1.00000 | 1.11 | 1.11 | 3  |
| BAG family molecular chaperone regulator 2            | Q91YN9 | 1.00000 | 1.15 | 1.15 | 2  |
| Rho guanine nucleotide exchange factor 18             | Q6P9R4 | 1.00000 | 1.11 | 1.11 | 2  |
| Voltage-dependent anion-selective channel protein 2   | Q60930 | 1.00000 | 0.99 | 1.01 | 17 |
| Zinc finger protein 382                               | B2RXC5 | 1.00000 | 0.97 | 1.03 | 76 |
| Dedicator of cytokinesis protein9                     | Q8BIK4 |         |      |      |    |
| Tubulin alpha-8 chain                                 | Q9JJZ2 | 1.00000 | 0.99 | 1.01 | 68 |
| Tubulin alpha chain-like 3                            | Q3UX10 |         |      |      |    |
| Tubulin alpha-1C chain                                | P68373 |         |      |      |    |
| Tubulin alpha-1A chain                                | P68369 |         |      |      |    |
| Tubulin alpha-4A chain                                | P68368 |         |      |      |    |
| Tubulin alpha-1B chain                                | P05213 |         |      |      |    |
| Tubulin alpha-3 chain                                 | P05214 |         |      |      |    |
| Peripheral-type benzodiazepine receptor-associated    | Q7TNF8 | 1.00000 | 1.02 | 1.02 | 20 |
| RIMS-binding protein 2                                | Q80U40 |         |      |      |    |
| Serine/threonine-protein kinase PAK7                  | Q8C015 | 1.00000 | 1.01 | 1.01 | 10 |
| 55 kDa erythrocyte membrane protein                   | P70290 | 1.00000 | 0.98 | 1.02 | 4  |
| Semaphorin-7A                                         | Q9QUR8 | 1.00000 | 1.07 | 1.07 | 9  |
| Serine/threonine-protein phosphatase PGAM5, mitoc     | Q8BX10 | 1.00000 | 0.94 | 1.06 | 9  |
| F-actin-capping protein subunit alpha-2               | P47754 | 1.00000 | 0.98 | 1.02 | 10 |
| Polycystic kidney disease protein11-like 3            | Q2EG98 | 1.00000 | 0.83 | 1.20 | 2  |
| Neuromodulin                                          | P06837 | 1.00000 | 0.95 | 1.05 | 12 |
| 60S ribosomal protein L27a                            | P14115 | 1.00000 | 1.02 | 1.02 | 3  |
| Diacylglycerol kinase beta                            | Q6NS52 | 1.00000 | 1.01 | 1.01 | 5  |
| Diacylglycerol kinase theta                           | Q6P5E8 |         |      |      |    |
| Disabled homolog 2-interacting protein                | Q3UHC7 | 1.00000 | 1.12 | 1.12 | 3  |
| TELO2-interacting protein 1 homolog                   | Q91V83 | 1.00000 | 1.04 | 1.04 | 2  |

|                                                         |        |         |      |      |    |
|---------------------------------------------------------|--------|---------|------|------|----|
| Cytochrome c oxidase subunit 2                          | P00405 | 1.00000 | 1.01 | 1.01 | 16 |
| Ras-related protein Rab-21                              | P35282 | 1.00000 | 0.85 | 1.18 | 5  |
| Protein HEG homolog 1                                   | E9Q7X6 | 1.00000 | 0.91 | 1.09 | 2  |
| Cytohesin-2                                             | P63034 | 1.00000 | 0.88 | 1.14 | 4  |
| Actin-related protein 2/3 complex subunit 4             | P59999 | 1.00000 | 0.92 | 1.09 | 5  |
| ADP-ribosylation factor 1                               | P84078 | 1.00000 | 1.66 | 1.66 | 3  |
| ADP-ribosylation factor 3                               | P61205 |         |      |      |    |
| ADP-ribosylation factor 2                               | Q8BSL7 |         |      |      |    |
| Glypican-1                                              | Q9QZF2 | 1.00000 | 0.94 | 1.06 | 2  |
| DNA topoisomerase 2-beta                                | Q64511 | 1.00000 | 1.00 | 1.00 | 3  |
| Janus kinase and microtubule-interacting protein 3      | Q5DTN8 | 1.00000 | 1.18 | 1.18 | 5  |
| Janus kinase and microtubule-interacting protein 1      | Q8BVL9 |         |      |      |    |
| Tetratricopeptide repeat protein 7B                     | E9Q6P5 | 1.00000 | 1.25 | 1.25 | 5  |
| [Pyruvate dehydrogenase (acetyl-transferring)] kinase   | Q9JK42 | 1.00000 | 1.21 | 1.21 | 5  |
| Vesicle-fusing ATPase                                   | P46460 | 1.00000 | 1.00 | 1.00 | 45 |
| Myotubularin-related protein 10                         | Q7TPM9 | 1.00000 | 1.05 | 1.05 | 4  |
| Leucine-rich repeat transmembrane neuronal protein      | Q8BGA3 | 1.00000 | 0.83 | 1.21 | 4  |
| Protein kintoun                                         | Q8BPI1 |         |      |      |    |
| Copine-2                                                | P59108 | 1.00000 | 0.97 | 1.03 | 17 |
| NADH dehydrogenase [ubiquinone] iron-sulfur protein     | Q9CXZ1 | 1.00000 | 1.02 | 1.02 | 4  |
| Gamma-soluble NSF attachment protein                    | Q9CWZ7 | 1.00000 | 1.07 | 1.07 | 2  |
| NADH dehydrogenase [ubiquinone] iron-containing protein | Q91WD5 | 1.00000 | 0.99 | 1.01 | 16 |
| Fibronectin type III and SPRY domain                    | Q7TPM6 | 1.00000 | 1.11 | 1.11 | 4  |
| Drebrin-like protein                                    | Q62418 | 1.00000 | 1.11 | 1.11 | 2  |
| Pleckstrin homology-like domain family B member 1       | Q6PDH0 | 1.00000 | 0.92 | 1.09 | 27 |
| Pleckstrin homology-like domain family B member 2       | Q8K1N2 |         |      |      |    |
| Syntaxin-binding protein 3                              | Q60770 | 1.00000 | 1.11 | 1.11 | 3  |
| Mitochondrial amidoxime reducing component 2            | Q922Q1 | 1.00000 | 0.91 | 1.09 | 5  |
| Neuronal membrane glycoprotein M6                       | P35803 | 1.00000 | 1.10 | 1.10 | 2  |
